# Supplementary material for: Cancer type classification using plasma cell-free RNAs derived from human and microbes
Source: eLife. 2022 Jul 11;11:e75181. doi: 10.7554/eLife.75181 (PMC9273212; doi:10.7554/eLife.75181)
Supplement: Supplementary file 2. [file elife-75181-supp2.xlsx]

## Sheet: Quality Control
sample_id	raw	pass0	pass	clean	pass0	pass	spikeIn	spikeIn Ratio	pass0	pass	genome	genome ratio	genome_rmdup	pass0	pass	rRNA	rRNA ratio	pass0	pass	lncRNA	mRNA	mRNA+lncRNA	mRNA+lncRNA/genome-rmdup	pass0	pass	Classified	Unclassified	Unclassified/genome-rmdup	pass0	pass	Intron-spanning	pass0	pass	Intron-Spanning Ratio
CRC-2280766	18750622	TRUE	1	16975278	TRUE	1	404142	0.0238077	TRUE	1	8724427	0.513949	1736964	TRUE	1	859222	0.0506161	TRUE	1	89649	1315736	1405385	0.809104	TRUE	1	1662831	74133	0.0426796	TRUE	1	767001	TRUE	1	0.441576		All sample	Condition	295
CRC-2327118	29037955	TRUE	1	26436666	TRUE	1	424222	0.0160467	TRUE	1	24570767	0.92942	4752702	TRUE	1	411787	0.0155764	TRUE	1	331695	3789146	4120841	0.867052	TRUE	1	4685649	67053	0.0141084	TRUE	1	2331157	TRUE	1	0.490491		Raw Filter	10000000	294
CRC-2334660	30702919	TRUE	1	28296873	TRUE	1	549318	0.0194127	TRUE	1	9688459	0.342386	1849891	TRUE	1	228339	0.00806941	TRUE	1	103688	1480984	1584672	0.85663	TRUE	1	1815206	34685	0.0187498	TRUE	1	885357	TRUE	1	0.4786		Clean Filter	5000000	294
CRC-2362297	38567343	TRUE	1	31510205	TRUE	1	409979	0.013011	TRUE	1	28657686	0.909473	8921780	TRUE	1	972824	0.0308733	TRUE	1	535269	7257805	7793074	0.873489	TRUE	1	8791567	130213	0.014595	TRUE	1	4409637	TRUE	1	0.494255		Spike in	0.5	291
CRC-2372270	18053499	TRUE	1	15137168	TRUE	1	1407480	0.0929817	TRUE	1	12465166	0.823481	1221083	TRUE	1	212879	0.0140633	TRUE	1	70894	915164	986058	0.807527	TRUE	1	1204775	16308	0.0133554	TRUE	1	492405	TRUE	1	0.403253		Genome Aligned Reads	500000	277
CRC-2380493	87300093	TRUE	1	48069543	TRUE	1	273281	0.00568512	TRUE	1	12661935	0.263409	2032666	TRUE	1	245111	0.00509909	TRUE	1	376709	274582	651291	0.320412	TRUE	1	1721246	311420	0.153208	TRUE	1	54827	FALSE	0	0.026973		rRNA	0.5	276
CRC-2382513	18614646	TRUE	1	16185220	TRUE	1	600529	0.0371035	TRUE	1	10671024	0.659307	3179260	TRUE	1	2514913	0.155383	TRUE	1	225792	2369440	2595232	0.816301	TRUE	1	3021178	158082	0.0497229	TRUE	1	1436903	TRUE	1	0.451961		Long RNA ratio	0.2	276
CRC-2383018	36621882	TRUE	1	33535835	TRUE	1	1555790	0.0463919	TRUE	1	27671721	0.825139	1054077	TRUE	1	1916443	0.0571461	TRUE	1	70484	734153	804637	0.763357	TRUE	1	1034620	19457	0.0184588	TRUE	1	453862	TRUE	1	0.430578		Unclassified	0.3	276
CRC-2383387	43256072	TRUE	1	39553652	TRUE	1	1347813	0.0340756	TRUE	1	31796698	0.803888	1305419	TRUE	1	3284667	0.0830433	TRUE	1	85770	962471	1048241	0.802992	TRUE	1	1281719	23700	0.0181551	TRUE	1	606066	TRUE	1	0.464269		Intron Spanning	100000	263
CRC-2383420	40730788	TRUE	1	39255149	TRUE	1	364985	0.00929776	TRUE	1	35063291	0.893215	7844624	TRUE	1	691480	0.017615	TRUE	1	449111	6285704	6734815	0.858526	TRUE	1	7723076	121548	0.0154944	TRUE	1	3597297	TRUE	1	0.458568
CRC-2383555	15475863	TRUE	1	14094222	TRUE	1	99605	0.00706708	TRUE	1	11765635	0.834784	2633263	TRUE	1	803931	0.0570398	TRUE	1	175439	1936751	2112190	0.802119	TRUE	1	2537017	96246	0.0365501	TRUE	1	1061904	TRUE	1	0.403265
CRC-2383730	79420210	TRUE	1	76000619	TRUE	1	1287	1.69341e-05	TRUE	1	66686013	0.87744	13624085	TRUE	1	1632767	0.0214836	TRUE	1	1369528	8400037	9769565	0.71708	TRUE	1	12796075	828010	0.0607755	TRUE	1	4836350	TRUE	1	0.354985
CRC-2384058	87148665	TRUE	1	43419098	TRUE	1	79040	0.0018204	TRUE	1	25968631	0.598092	3151001	TRUE	1	1377299	0.031721	TRUE	1	708217	209682	917899	0.291304	TRUE	1	2608083	542918	0.1723	TRUE	1	79569	FALSE	0	0.025252
CRC-2384076	34577471	TRUE	1	28439835	TRUE	1	153656	0.00540284	TRUE	1	26133686	0.918911	6425060	TRUE	1	857711	0.0301588	TRUE	1	387452	5170868	5558320	0.8651	TRUE	1	6337318	87742	0.0136562	TRUE	1	3042366	TRUE	1	0.473516
CRC-2384108	35000606	TRUE	1	32002472	TRUE	1	871774	0.0272408	TRUE	1	27621110	0.863093	1374726	TRUE	1	1501540	0.0469195	TRUE	1	86125	1038582	1124707	0.818132	TRUE	1	1347251	27475	0.0199858	TRUE	1	627691	TRUE	1	0.456594
CRC-2384226	44573194	TRUE	1	42661755	TRUE	1	894836	0.0209751	TRUE	1	32422502	0.75999	7401685	TRUE	1	729361	0.0170964	TRUE	1	448175	5731292	6179467	0.834873	TRUE	1	7285306	116379	0.0157233	TRUE	1	3112662	TRUE	1	0.420534
CRC-2384272	32997288	TRUE	1	24665687	TRUE	1	1295889	0.0525381	TRUE	1	21521111	0.872512	1717222	TRUE	1	488605	0.0198091	TRUE	1	134728	1347951	1482679	0.863417	TRUE	1	1694808	22414	0.0130525	TRUE	1	909955	TRUE	1	0.529899
CRC-2384377	32100504	TRUE	1	31310975	TRUE	1	2333	7.45106e-05	TRUE	1	24777743	0.791344	6009416	TRUE	1	1564402	0.0499634	TRUE	1	351353	4766455	5117808	0.851632	TRUE	1	5904269	105147	0.017497	TRUE	1	2547833	TRUE	1	0.423973
CRC-2384422	44323371	TRUE	1	40681127	TRUE	1	492903	0.0121163	TRUE	1	37041406	0.91053	4780809	TRUE	1	1321210	0.0324772	TRUE	1	309138	3459523	3768661	0.788289	TRUE	1	4698127	82682	0.0172946	TRUE	1	1923663	TRUE	1	0.402372
CRC-2384541	56521789	TRUE	1	31545181	TRUE	1	1532632	0.0485853	TRUE	1	11219798	0.355674	597159	TRUE	1	6142552	0.194722	TRUE	1	68153	262101	330254	0.553042	TRUE	1	521948	75211	0.125948	TRUE	1	104384	TRUE	1	0.174801
CRC-2384548	43868757	TRUE	1	36740642	TRUE	1	1010287	0.0274978	TRUE	1	18001009	0.489948	3599712	TRUE	1	7446690	0.202683	TRUE	1	310920	2366402	2677322	0.74376	TRUE	1	3448063	151649	0.0421281	TRUE	1	1358536	TRUE	1	0.377401
CRC-2384796	39103282	TRUE	1	36327043	TRUE	1	282472	0.0077758	TRUE	1	32062647	0.882611	5843386	TRUE	1	1776364	0.0488992	TRUE	1	374546	4498721	4873267	0.83398	TRUE	1	5734891	108495	0.0185671	TRUE	1	2618862	TRUE	1	0.448175
CRC-2386412	46436715	TRUE	1	42833948	TRUE	1	2268278	0.0529551	TRUE	1	27120033	0.633143	2104090	TRUE	1	2469473	0.0576522	TRUE	1	153207	1483169	1636376	0.777712	TRUE	1	2045912	58178	0.02765	TRUE	1	792259	TRUE	1	0.376533
CRC-2386612	33467808	TRUE	1	31737690	TRUE	1	951904	0.0299929	TRUE	1	24895037	0.7844	2868481	TRUE	1	1294069	0.0407739	TRUE	1	167829	2222915	2390744	0.833453	TRUE	1	2820070	48411	0.0168769	TRUE	1	1376052	TRUE	1	0.479715
CRC-2387327	41742081	TRUE	1	39637526	TRUE	1	2595243	0.0654744	TRUE	1	29736658	0.750215	4304330	TRUE	1	1320244	0.0333079	TRUE	1	233704	3346651	3580355	0.831803	TRUE	1	4240614	63716	0.0148028	TRUE	1	1801061	TRUE	1	0.41843
CRC-2388859	73859780	TRUE	1	70106214	TRUE	1	4394129	0.0626782	TRUE	1	57020597	0.813346	9874735	TRUE	1	952350	0.0135844	TRUE	1	827202	6352198	7179400	0.727047	TRUE	1	9416639	458096	0.0463907	TRUE	1	3561991	TRUE	1	0.360718
CRC-2388932	47926735	TRUE	1	45682284	TRUE	1	798946	0.0174892	TRUE	1	41151463	0.900819	8070765	TRUE	1	1086382	0.0237813	TRUE	1	440533	6505931	6946464	0.860695	TRUE	1	7951623	119142	0.0147622	TRUE	1	4000696	TRUE	1	0.495702
CRC-2389212	33626655	TRUE	1	22466900	TRUE	1	1468025	0.0653417	TRUE	1	10280725	0.457594	693128	TRUE	1	1199873	0.0534063	TRUE	1	46830	417658	464488	0.670133	TRUE	1	653215	39913	0.0575839	TRUE	1	220959	TRUE	1	0.318785
CRC-2390502	63117867	TRUE	1	58571379	TRUE	1	1822504	0.0311159	TRUE	1	50933832	0.869603	9480403	TRUE	1	1708301	0.0291661	TRUE	1	585660	7563337	8148997	0.859562	TRUE	1	9344716	135687	0.0143124	TRUE	1	4628723	TRUE	1	0.488241
CRC-2390539	84632635	TRUE	1	42280161	TRUE	1	2824062	0.066794	TRUE	1	6180372	0.146177	356079	FALSE	0	788946	0.01866	TRUE	0	42657	146509	189166	0.531247	TRUE	0	319293	36786	0.103309	TRUE	0	79036	FALSE	0	0.221962
CRC-2390716	38619959	TRUE	1	36698920	TRUE	1	1727145	0.0470626	TRUE	1	29270132	0.797575	3969168	TRUE	1	3467010	0.0944717	TRUE	1	216995	3131283	3348278	0.843572	TRUE	1	3890355	78813	0.0198563	TRUE	1	1915156	TRUE	1	0.482508
CRC-2391097	32932963	TRUE	1	30146527	TRUE	1	791910	0.0262687	TRUE	1	27160630	0.900954	5419611	TRUE	1	488078	0.0161902	TRUE	1	365856	4215085	4580941	0.845253	TRUE	1	5334693	84918	0.0156687	TRUE	1	2496024	TRUE	1	0.460554
CRC-2393807	34832039	TRUE	1	33915306	TRUE	1	1526044	0.0449957	TRUE	1	25873861	0.762896	1893460	TRUE	1	1868652	0.0550976	TRUE	1	103715	1331651	1435366	0.758065	TRUE	1	1860799	32661	0.0172494	TRUE	1	751133	TRUE	1	0.396699
CRC-2396217	32899308	TRUE	1	31037987	TRUE	1	3085857	0.0994219	TRUE	1	22469823	0.723946	2275925	TRUE	1	793134	0.0255537	TRUE	1	125814	1723794	1849608	0.812684	TRUE	1	2235702	40223	0.0176733	TRUE	1	896570	TRUE	1	0.393937
CRC-2396837	44002385	TRUE	1	39728628	TRUE	1	1309447	0.0329598	TRUE	1	35338268	0.889491	6606822	TRUE	1	540096	0.0135946	TRUE	1	413024	5201859	5614883	0.849861	TRUE	1	6513062	93760	0.0141914	TRUE	1	3095349	TRUE	1	0.468508
CRC-2397180	36472500	TRUE	1	35186308	TRUE	1	843464	0.0239714	TRUE	1	28590988	0.81256	1972206	TRUE	1	1116828	0.0317404	TRUE	1	120101	1516001	1636102	0.82958	TRUE	1	1930240	41966	0.0212787	TRUE	1	799170	TRUE	1	0.405216
CRC-2398897	38793794	TRUE	1	36392713	TRUE	1	4421595	0.121497	TRUE	1	15253804	0.419144	2619243	TRUE	1	14463329	0.397424	TRUE	1	208305	1750428	1958733	0.747824	TRUE	1	2492890	126353	0.0482403	TRUE	1	1101017	TRUE	1	0.420357
CRC-2399129	50622889	TRUE	1	40012411	TRUE	1	1608445	0.0401987	TRUE	1	4393382	0.1098	219322	FALSE	0	372536	0.00931051	TRUE	0	39146	34637	73783	0.336414	TRUE	0	190685	28637	0.130571	TRUE	0	13071	FALSE	0	0.0595973
CRC-2405108	90883936	TRUE	1	22056319	TRUE	1	305298	0.0138417	TRUE	1	14407924	0.653233	1915552	TRUE	1	5007613	0.227038	TRUE	1	139269	1375002	1514271	0.790514	TRUE	1	1817221	98331	0.051333	TRUE	1	743263	TRUE	1	0.388015
CRC-2406345	45421429	TRUE	1	41049449	TRUE	1	573790	0.013978	TRUE	1	21027419	0.512246	4794867	TRUE	1	273724	0.00666815	TRUE	1	293265	3649712	3942977	0.822333	TRUE	1	4730629	64238	0.0133972	TRUE	1	2175914	TRUE	1	0.453801
CRC-2406552	41404008	TRUE	1	37658471	TRUE	1	348604	0.00925699	TRUE	1	23172202	0.615325	4936465	TRUE	1	284284	0.00754901	TRUE	1	311196	3819740	4130936	0.836821	TRUE	1	4851082	85383	0.0172964	TRUE	1	2174185	TRUE	1	0.440434
CRC-2407821	63268538	TRUE	1	59020678	TRUE	1	255793	0.00433396	TRUE	1	55740967	0.944431	6646076	TRUE	1	384598	0.00651633	TRUE	1	457779	5048644	5506423	0.828522	TRUE	1	6559426	86650	0.0130378	TRUE	1	3084029	TRUE	1	0.464038
CRC-2408137	47879807	TRUE	1	44627779	TRUE	1	325146	0.00728573	TRUE	1	25788212	0.577851	6102956	TRUE	1	737979	0.0165363	TRUE	1	385466	4772988	5158454	0.845239	TRUE	1	5981301	121655	0.0199338	TRUE	1	2974209	TRUE	1	0.487339
CRC-2408162	41597873	TRUE	1	38375956	TRUE	1	341056	0.00888723	TRUE	1	22680458	0.591007	5672269	TRUE	1	590495	0.0153871	TRUE	1	338197	4532555	4870752	0.858696	TRUE	1	5592611	79658	0.0140434	TRUE	1	2735356	TRUE	1	0.482233
CRC-2408206	51041405	TRUE	1	46979324	TRUE	1	1116157	0.0237585	TRUE	1	42427602	0.903112	8604753	TRUE	1	771459	0.0164212	TRUE	1	531167	7006843	7538010	0.876029	TRUE	1	8490666	114087	0.0132586	TRUE	1	4456618	TRUE	1	0.517925
CRC-2408346	42081586	TRUE	1	38869162	TRUE	1	1633325	0.0420211	TRUE	1	33400289	0.8593	7224848	TRUE	1	1062029	0.0273232	TRUE	1	453507	5768860	6222367	0.861245	TRUE	1	7098135	126713	0.0175385	TRUE	1	3764471	TRUE	1	0.521045
CRC-2408784	42949877	TRUE	1	38885883	TRUE	1	118602	0.00305	TRUE	1	32830882	0.844288	5870153	TRUE	1	221734	0.00570217	TRUE	1	392946	4508849	4901795	0.835037	TRUE	1	5797028	73125	0.0124571	TRUE	1	2705134	TRUE	1	0.460829
CRC-2410759	25855254	TRUE	1	22497027	TRUE	1	792558	0.0352295	TRUE	1	19452426	0.864667	3967085	TRUE	1	398883	0.0177305	TRUE	1	227757	3105479	3333236	0.840223	TRUE	1	3913903	53182	0.0134058	TRUE	1	1787816	TRUE	1	0.450662
CRC-2410966	28279172	TRUE	1	26041287	TRUE	1	10831	0.000415916	TRUE	1	23053699	0.885275	2713811	TRUE	1	249680	0.00958785	TRUE	1	173406	2093571	2266977	0.835348	TRUE	1	2674966	38845	0.0143138	TRUE	1	1240347	TRUE	1	0.45705
CRC-2411883	55009561	TRUE	1	52733249	TRUE	1	128711	0.00244079	TRUE	1	46592817	0.883557	5327637	TRUE	1	2304387	0.0436989	TRUE	1	383373	3832374	4215747	0.791298	TRUE	1	5183035	144602	0.0271419	TRUE	1	2149967	TRUE	1	0.40355
CRC-2411896	97065172	TRUE	1	92330350	TRUE	1	27601	0.000298937	TRUE	1	83050391	0.899492	7548643	TRUE	1	4298369	0.0465542	TRUE	1	635241	5107470	5742711	0.760761	TRUE	1	7272105	276538	0.0366341	TRUE	1	2842118	TRUE	1	0.376507
CRC-2412048	31709203	TRUE	1	28833794	TRUE	1	544417	0.0188812	TRUE	1	25178981	0.873246	4042935	TRUE	1	1631815	0.0565938	TRUE	1	231458	3208553	3440011	0.85087	TRUE	1	3982352	60583	0.0149849	TRUE	1	1960206	TRUE	1	0.484847
CRC-2412066	24954251	TRUE	1	23991477	TRUE	1	1046	4.35988e-05	TRUE	1	20975054	0.874271	1722605	TRUE	1	1169648	0.0487526	TRUE	1	140091	1177140	1317231	0.764674	TRUE	1	1671075	51530	0.029914	TRUE	1	634747	TRUE	1	0.368481
CRC-9299429	77101435	TRUE	1	73971785	TRUE	1	2232	3.01737e-05	TRUE	1	62472685	0.844547	9777386	TRUE	1	1921703	0.0259789	TRUE	1	811670	6815411	7627081	0.780074	TRUE	1	9391089	386297	0.0395092	TRUE	1	3887567	TRUE	1	0.397608
ESCA_KZ-10	38037751	TRUE	1	35913059	TRUE	1	9501762	0.264577	TRUE	1	2596994	0.0723134	241134	FALSE	0	17848894	0.497003	TRUE	0	19833	80185	100018	0.414782	TRUE	0	219173	21961	0.0910738	TRUE	0	65685	FALSE	0	0.2724
ESCA_KZ-17	38875884	TRUE	1	36661913	TRUE	1	6309497	0.1721	TRUE	1	13614808	0.371361	1154962	TRUE	1	8412791	0.22947	TRUE	1	216617	139209	355826	0.308085	TRUE	1	947568	207394	0.179568	TRUE	1	113559	TRUE	1	0.0983227
ESCA_KZ-19	34896133	TRUE	1	32354567	TRUE	1	10510227	0.324845	TRUE	1	7139345	0.22066	262156	FALSE	0	5226018	0.161523	TRUE	0	20750	77482	98232	0.374708	TRUE	0	242192	19964	0.0761531	TRUE	0	47029	FALSE	0	0.179393
ESCA_KZ-20	35793390	TRUE	1	32929231	TRUE	1	19111631	0.580385	FALSE	0	10155553	0.308405	777214	TRUE	0	933258	0.0283413	TRUE	0	88300	398157	486457	0.625898	TRUE	0	700245	76969	0.0990319	TRUE	0	297998	TRUE	0	0.383418
ESCA_KZ-5	37820998	TRUE	1	36152206	TRUE	1	5957092	0.164778	TRUE	1	8012847	0.221642	548331	TRUE	1	13213555	0.365498	TRUE	1	75118	136953	212071	0.386757	TRUE	1	479343	68988	0.125815	TRUE	1	99762	FALSE	0	0.181938
ESCA_KZ-7	34209469	TRUE	1	32051996	TRUE	1	12409568	0.38717	TRUE	1	2690206	0.0839326	189165	FALSE	0	9277470	0.289451	TRUE	0	16957	68061	85018	0.449438	TRUE	0	170544	18621	0.0984379	TRUE	0	54851	FALSE	0	0.289964
ESCA_PKU-2412110	31679454	TRUE	1	29972229	TRUE	1	327	1.09101e-05	TRUE	1	27471482	0.916565	4436293	TRUE	1	556773	0.0185763	TRUE	1	285988	3392378	3678366	0.829153	TRUE	1	4345715	90578	0.0204175	TRUE	1	1765719	TRUE	1	0.398017
ESCA_PKU-2412347	31958746	TRUE	1	30568879	TRUE	1	606	1.98241e-05	TRUE	1	26587910	0.869771	5199678	TRUE	1	1075901	0.035196	TRUE	1	370197	3846677	4216874	0.810988	TRUE	1	5069477	130201	0.0250402	TRUE	1	2043094	TRUE	1	0.392927
ESCA_PKU-2412565	32840593	TRUE	1	31427994	TRUE	1	669	2.12868e-05	TRUE	1	27625085	0.878996	6194209	TRUE	1	1356202	0.0431527	TRUE	1	358737	4881460	5240197	0.845983	TRUE	1	6076059	118150	0.0190743	TRUE	1	2550011	TRUE	1	0.411677
ESCA_PKU-2412866	27897495	TRUE	1	25834766	TRUE	1	852	3.29788e-05	TRUE	1	23173169	0.896976	4183843	TRUE	1	937698	0.036296	TRUE	1	266812	3225832	3492644	0.834793	TRUE	1	4087498	96345	0.0230279	TRUE	1	1720417	TRUE	1	0.411205
ESCA_PKU-2414413	32497453	TRUE	1	31028441	TRUE	1	4404	0.000141934	TRUE	1	22741950	0.732939	3068168	TRUE	1	1390233	0.0448051	TRUE	1	251022	2007863	2258885	0.736233	TRUE	1	2935081	133087	0.0433767	TRUE	1	1030215	TRUE	1	0.335775
ESCA_PKU-2414433	35740611	TRUE	1	34294030	TRUE	1	1592	4.64221e-05	TRUE	1	29182366	0.850946	4636965	TRUE	1	1114155	0.0324883	TRUE	1	270894	3529974	3800868	0.819689	TRUE	1	4552465	84500	0.0182231	TRUE	1	1877460	TRUE	1	0.40489
ESCA_PKU-2414466	35080356	TRUE	1	33370009	TRUE	1	2153	6.4519e-05	TRUE	1	28707275	0.860272	2731894	TRUE	1	937812	0.0281034	TRUE	1	156555	1975365	2131920	0.780382	TRUE	1	2673052	58842	0.0215389	TRUE	1	873458	TRUE	1	0.319726
ESCA_PKU-2414682	28681938	TRUE	1	27351977	TRUE	1	698	2.55192e-05	TRUE	1	24301852	0.888486	6434076	TRUE	1	1383401	0.0505777	TRUE	1	545249	4366663	4911912	0.763422	TRUE	1	6146889	287187	0.0446353	TRUE	1	2257692	TRUE	1	0.350896
ESCA_PKU-2414854	32432102	TRUE	1	30842534	TRUE	1	868	2.8143e-05	TRUE	1	26497887	0.859135	6296425	TRUE	1	2671170	0.0866067	TRUE	1	361519	4927313	5288832	0.839974	TRUE	1	6147509	148916	0.0236509	TRUE	1	2782656	TRUE	1	0.441942
ESCA_PKU-2415457	26060701	TRUE	1	24417294	TRUE	1	985	4.03403e-05	TRUE	1	20297385	0.831271	3934841	TRUE	1	802845	0.0328802	TRUE	1	268994	2928055	3197049	0.812498	TRUE	1	3828043	106798	0.0271416	TRUE	1	1592149	TRUE	1	0.404629
ESCA_PKU-2415469	58051944	TRUE	1	55183086	TRUE	1	1451	2.62943e-05	TRUE	1	39526336	0.716276	2317775	TRUE	1	1807482	0.0327543	TRUE	1	143062	1715139	1858201	0.801718	TRUE	1	2262651	55124	0.0237832	TRUE	1	828723	TRUE	1	0.357551
ESCA_PKU-2415974	32919526	TRUE	1	31373004	TRUE	1	940	2.99621e-05	TRUE	1	27511943	0.87693	3261362	TRUE	1	741547	0.0236365	TRUE	1	211458	2433326	2644784	0.810945	TRUE	1	3186164	75198	0.0230572	TRUE	1	1181427	TRUE	1	0.36225
ESCA_PKU-2418551	35982849	TRUE	1	34464932	TRUE	1	673	1.95271e-05	TRUE	1	29035427	0.842463	5694681	TRUE	1	1369521	0.0397367	TRUE	1	378624	4384918	4763542	0.83649	TRUE	1	5572544	122137	0.0214476	TRUE	1	2243904	TRUE	1	0.394035
ESCA_PKU-2418615	32314913	TRUE	1	31360871	TRUE	1	2657	8.47234e-05	TRUE	1	27608361	0.880344	5389432	TRUE	1	909173	0.0289907	TRUE	1	316210	4300219	4616429	0.856571	TRUE	1	5300892	88540	0.0164284	TRUE	1	2451740	TRUE	1	0.454916
ESCA_TJHH-569608	23420087	TRUE	1	22398903	TRUE	1	3906	0.000174384	TRUE	1	3506566	0.156551	964162	TRUE	1	625079	0.0279067	TRUE	1	142483	344606	487089	0.505194	TRUE	1	841124	123038	0.127611	TRUE	1	199569	TRUE	1	0.206987
ESCA_TJHH-569799	27083331	TRUE	1	24743002	TRUE	1	25697	0.00103856	TRUE	1	16091545	0.650347	1173068	TRUE	1	1465543	0.0592306	TRUE	1	163788	457591	621379	0.529704	TRUE	1	1028474	144594	0.123261	TRUE	1	324867	TRUE	1	0.276938
ESCA_UnionH-1620241	41908409	TRUE	1	39798187	TRUE	1	10544	0.000264937	TRUE	1	29217566	0.734143	4559068	TRUE	1	6396617	0.160726	TRUE	1	370754	3031946	3402700	0.746359	TRUE	1	4331543	227525	0.049906	TRUE	1	1760351	TRUE	1	0.386121
ESCA_UnionH-1626151	40009823	TRUE	1	37585649	TRUE	1	3737	9.94262e-05	TRUE	1	29220186	0.777429	5795645	TRUE	1	4304953	0.114537	TRUE	1	532788	3553745	4086533	0.705104	TRUE	1	5423159	372486	0.06427	TRUE	1	2257507	TRUE	1	0.389518
ESCA_UnionH-1626626	31403691	TRUE	1	30041377	TRUE	1	383723	0.0127731	TRUE	1	10634630	0.353999	261941	FALSE	0	1345495	0.0447881	TRUE	0	51477	24031	75508	0.288263	TRUE	0	212685	49256	0.188042	TRUE	0	16494	FALSE	0	0.0629684
ESCA_UnionH-1628973	49126334	TRUE	1	46123776	TRUE	1	10277	0.000222814	TRUE	1	37487660	0.812762	6185587	TRUE	1	4589317	0.0995	TRUE	1	363861	4858193	5222054	0.844229	TRUE	1	6059514	126073	0.0203817	TRUE	1	2945186	TRUE	1	0.476137
ESCA_UnionH-1629817	43837412	TRUE	1	41369402	TRUE	1	6896	0.000166693	TRUE	1	31996639	0.773437	4315612	TRUE	1	5219828	0.126176	TRUE	1	279173	3280832	3560005	0.824913	TRUE	1	4184119	131493	0.0304691	TRUE	1	2033082	TRUE	1	0.471099
ESCA_UnionH-1631432	33477640	TRUE	1	32370786	TRUE	1	4717	0.000145718	TRUE	1	18852775	0.582401	440263	FALSE	0	767306	0.0237037	TRUE	0	91293	31803	123096	0.279597	TRUE	0	356442	83821	0.190388	TRUE	0	20102	FALSE	0	0.0456591
ESCA_XieH-1630667	22096685	TRUE	1	21187957	TRUE	1	6832	0.000322447	TRUE	1	13459287	0.635233	4121572	TRUE	1	3929754	0.185471	TRUE	1	674481	1227781	1902262	0.461538	TRUE	1	3525350	596222	0.144659	TRUE	1	707387	TRUE	1	0.17163
ESCA_XieH-1630872	24055803	TRUE	1	22515146	TRUE	1	1821	8.08789e-05	TRUE	1	18962900	0.842229	4060853	TRUE	1	1467512	0.0651789	TRUE	1	289498	2937351	3226849	0.794623	TRUE	1	3941898	118955	0.0292931	TRUE	1	1688386	TRUE	1	0.415771
ESCA-15	23254878	TRUE	1	22116135	TRUE	1	3904373	0.17654	TRUE	1	5931087	0.268179	281446	FALSE	0	8641115	0.390715	TRUE	0	29404	59641	89045	0.316384	TRUE	0	251521	29925	0.106326	TRUE	0	41107	FALSE	0	0.146056
HCC_ChQ-33630257	37828625	TRUE	1	36754705	TRUE	1	217400	0.00591489	TRUE	1	23663227	0.643815	1793949	TRUE	1	4429792	0.120523	TRUE	1	326229	319508	645737	0.359953	TRUE	1	1467962	325987	0.181715	TRUE	1	257548	TRUE	1	0.143565
HCC_ChQ-7000014337	69586722	TRUE	1	67374441	TRUE	1	527483	0.00782913	TRUE	1	34957058	0.518847	1211681	TRUE	1	3424068	0.0508215	TRUE	1	238412	212641	451053	0.372254	TRUE	1	1014126	197555	0.163042	TRUE	1	236159	TRUE	1	0.194902
HCC_ChQ-8002011290	38339579	TRUE	1	36913190	TRUE	1	236865	0.00641681	TRUE	1	21400585	0.579754	1314298	TRUE	1	2308791	0.0625465	TRUE	1	206322	429192	635514	0.483539	TRUE	1	1130826	183472	0.139597	TRUE	1	343824	TRUE	1	0.261603
HCC_ChQ-8002020781	48018304	TRUE	1	45953877	TRUE	1	324563	0.0070628	TRUE	1	32657137	0.71065	4395934	TRUE	1	2167385	0.0471644	TRUE	1	880344	379342	1259686	0.286557	TRUE	1	3468597	927337	0.210953	TRUE	1	443283	TRUE	1	0.100839
HCC_ChQ-91244930	77700518	TRUE	1	75077970	TRUE	1	640853	0.00853583	TRUE	1	51822870	0.690254	1582061	TRUE	1	5859970	0.0780518	TRUE	1	219591	722099	941690	0.59523	TRUE	1	1431953	150108	0.0948813	TRUE	1	554665	TRUE	1	0.350596
HCC_ShH-214851	40830778	TRUE	1	39936277	TRUE	1	62957	0.00157644	TRUE	1	27427413	0.686779	2745529	TRUE	1	2113795	0.0529292	TRUE	1	287579	1422802	1710381	0.62297	TRUE	1	2539935	205594	0.0748832	TRUE	1	740228	TRUE	1	0.269612
HCC_ShH-216070	33475404	TRUE	1	31949500	TRUE	1	77124	0.00241393	TRUE	1	28043571	0.877747	6236668	TRUE	1	907535	0.0284053	TRUE	1	1060083	1407615	2467698	0.395676	TRUE	1	5336983	899685	0.144257	TRUE	1	820104	TRUE	1	0.131497
HCC_ShH-216159	30626720	TRUE	1	26850669	TRUE	1	1012266	0.0376998	TRUE	1	23660086	0.881173	2820159	TRUE	1	286365	0.0106651	TRUE	1	204681	2041417	2246098	0.796444	TRUE	1	2743999	76160	0.0270056	TRUE	1	1148491	TRUE	1	0.407243
HCC_ShH-216176	30036065	TRUE	1	27842881	TRUE	1	69664	0.00250204	TRUE	1	24214472	0.869683	6427973	TRUE	1	783269	0.0281318	TRUE	1	1083091	1516130	2599221	0.404361	TRUE	1	5530020	897953	0.139695	TRUE	1	879302	TRUE	1	0.136793
HCC_ShH-216180	37477940	TRUE	1	34421672	TRUE	1	7542208	0.219112	TRUE	1	13663001	0.39693	743874	TRUE	1	3548665	0.103094	TRUE	1	106511	305023	411534	0.553231	TRUE	1	680596	63278	0.0850655	TRUE	1	236933	TRUE	1	0.318512
HCC_ShH-216222	33598811	TRUE	1	31511670	TRUE	1	16903	0.000536404	TRUE	1	27352216	0.868003	8166793	TRUE	1	904792	0.0287129	TRUE	1	1235795	2263499	3499294	0.428478	TRUE	1	7190631	976162	0.119528	TRUE	1	1366506	TRUE	1	0.167325
HCC_ShH-216224	32287502	TRUE	1	30390804	TRUE	1	58799	0.00193476	TRUE	1	23688150	0.779451	8025731	TRUE	1	696238	0.0229095	TRUE	1	1476392	1373354	2849746	0.355076	TRUE	1	6689935	1335796	0.166439	TRUE	1	885386	TRUE	1	0.110318
HCC_ShH-216260	34862699	TRUE	1	33413986	TRUE	1	17169	0.000513827	TRUE	1	29128050	0.871732	7635501	TRUE	1	981912	0.0293863	TRUE	1	1175704	2029110	3204814	0.419725	TRUE	1	6690756	944745	0.123731	TRUE	1	1222615	TRUE	1	0.160122
HCC_ShH-216265	39333267	TRUE	1	38103526	TRUE	1	1307	3.43013e-05	TRUE	1	16583725	0.435228	6585482	TRUE	1	1447469	0.0379878	TRUE	1	715674	2982521	3698195	0.561568	TRUE	1	6115167	470315	0.0714169	TRUE	1	1468394	TRUE	1	0.222974
HCC_ShH-216276	38295174	TRUE	1	36694870	TRUE	1	63030	0.00171768	TRUE	1	28898537	0.787536	8225466	TRUE	1	856540	0.0233422	TRUE	1	1537380	1287538	2824918	0.343436	TRUE	1	6816407	1409059	0.171304	TRUE	1	846948	TRUE	1	0.102967
HCC_ShH-216287	33010043	TRUE	1	30405792	TRUE	1	15999	0.000526183	TRUE	1	26452667	0.869988	7163218	TRUE	1	496128	0.0163169	TRUE	1	895047	3413052	4308099	0.60142	TRUE	1	6496242	666976	0.0931112	TRUE	1	2275186	TRUE	1	0.317621
HCC_ShH-216288	32067592	TRUE	1	31455320	TRUE	1	17135	0.000544741	TRUE	1	25884735	0.822905	4192780	TRUE	1	1038552	0.0330167	TRUE	1	297737	2629615	2927352	0.698189	TRUE	1	4076036	116744	0.0278441	TRUE	1	1279418	TRUE	1	0.305148
HCC_ShH-216290	29707148	TRUE	1	27775415	TRUE	1	14133	0.000508831	TRUE	1	22326646	0.803828	10293811	TRUE	1	599873	0.0215973	TRUE	1	1826921	2071749	3898670	0.378739	TRUE	1	8731779	1562032	0.151745	TRUE	1	1266138	TRUE	1	0.123
HCC_ShH-216306	26059611	TRUE	1	24956058	TRUE	1	16448	0.000659078	TRUE	1	22512280	0.902077	3734980	TRUE	1	216164	0.00866178	TRUE	1	416071	2187396	2603467	0.69705	TRUE	1	3481568	253412	0.0678483	TRUE	1	1454006	TRUE	1	0.389294
HCC_ShH-216310	34663451	TRUE	1	31571004	TRUE	1	72659	0.00230145	TRUE	1	27539833	0.872314	6504128	TRUE	1	974640	0.0308714	TRUE	1	797003	2763664	3560667	0.547447	TRUE	1	5987209	516919	0.0794755	TRUE	1	1746098	TRUE	1	0.26846
HCC_ShH-216314	41488031	TRUE	1	39471516	TRUE	1	19927	0.000504845	TRUE	1	34418051	0.871972	7665671	TRUE	1	666670	0.0168899	TRUE	1	1007583	3383616	4391199	0.572839	TRUE	1	6881136	784535	0.102344	TRUE	1	2253471	TRUE	1	0.293969
HCC_ShH-216328	39964631	TRUE	1	38224982	TRUE	1	16434	0.000429928	TRUE	1	31479489	0.823532	11887988	TRUE	1	853780	0.0223357	TRUE	1	2154718	2200176	4354894	0.366327	TRUE	1	10014933	1873055	0.157559	TRUE	1	1358650	TRUE	1	0.114288
HCC_ShH-216336	32777239	TRUE	1	28940772	TRUE	1	1477248	0.0510438	TRUE	1	25232017	0.87185	2427047	TRUE	1	395579	0.0136686	TRUE	1	194350	1577000	1771350	0.729838	TRUE	1	2338497	88550	0.0364847	TRUE	1	822668	TRUE	1	0.338958
HCC_ShH-216368	44657420	TRUE	1	41537576	TRUE	1	20762	0.000499837	TRUE	1	30540212	0.735243	15165667	TRUE	1	289723	0.00697496	TRUE	1	2956564	2225753	5182317	0.341714	TRUE	1	12368891	2796776	0.184415	TRUE	1	1412939	TRUE	1	0.093167
HCC_ShH-216372	29634337	TRUE	1	26496813	TRUE	1	1556690	0.0587501	TRUE	1	22014267	0.830827	2305563	TRUE	1	802919	0.0303025	TRUE	1	151525	1688940	1840465	0.798271	TRUE	1	2260941	44622	0.0193541	TRUE	1	969200	TRUE	1	0.420375
HCC_ShH-216383	32690321	TRUE	1	31674198	TRUE	1	2773	8.75476e-05	TRUE	1	27910225	0.881166	8664029	TRUE	1	258070	0.00814764	TRUE	1	1671875	1408377	3080252	0.355522	TRUE	1	7279733	1384296	0.159775	TRUE	1	809385	TRUE	1	0.093419
HCC_ShH-216386	29907441	TRUE	1	27411260	TRUE	1	2181538	0.0795855	TRUE	1	20981035	0.765417	1631671	TRUE	1	1838909	0.0670859	TRUE	1	159007	764752	923759	0.566143	TRUE	1	1539593	92078	0.0564317	TRUE	1	440044	TRUE	1	0.269689
HCC_ShH-216387	36872117	TRUE	1	34959957	TRUE	1	77795	0.00222526	TRUE	1	30566613	0.874332	6009377	TRUE	1	1110977	0.0317786	TRUE	1	751704	2473853	3225557	0.536754	TRUE	1	5504912	504465	0.0839463	TRUE	1	1555076	TRUE	1	0.258775
HCC_ShH-216390	31666788	TRUE	1	29707037	TRUE	1	14894	0.000501363	TRUE	1	27396318	0.922216	9625092	TRUE	1	153555	0.00516898	TRUE	1	1734712	2217780	3952492	0.410645	TRUE	1	8268586	1356506	0.140934	TRUE	1	1285064	TRUE	1	0.133512
HCC_ShH-216393	29350133	TRUE	1	27357037	TRUE	1	1749303	0.0639434	TRUE	1	21302349	0.778679	1837001	TRUE	1	2292383	0.083795	TRUE	1	236655	638148	874803	0.476213	TRUE	1	1658904	178097	0.0969499	TRUE	1	368890	TRUE	1	0.200811
HCC_ShH-216398	39447100	TRUE	1	37887287	TRUE	1	17845	0.000471002	TRUE	1	29308525	0.773571	13606422	TRUE	1	273618	0.00722189	TRUE	1	2684598	1827362	4511960	0.331605	TRUE	1	11056452	2549970	0.187409	TRUE	1	1188470	TRUE	1	0.0873463
HCC_ShH-216435	36470678	TRUE	1	35632781	TRUE	1	10720	0.000300847	TRUE	1	30878429	0.866574	4872608	TRUE	1	891229	0.0250115	TRUE	1	352070	3201206	3553276	0.729235	TRUE	1	4746719	125889	0.0258361	TRUE	1	1649350	TRUE	1	0.338494
HCC_ShH-216447	38161103	TRUE	1	36744931	TRUE	1	4645	0.000126412	TRUE	1	30446055	0.828578	9880826	TRUE	1	940814	0.0256039	TRUE	1	1851674	1684328	3536002	0.357865	TRUE	1	8128616	1752210	0.177334	TRUE	1	1085631	TRUE	1	0.109872
HCC_ShH-216450	35448597	TRUE	1	33438958	TRUE	1	50965	0.00152412	TRUE	1	30680720	0.917514	13119767	TRUE	1	109194	0.00326547	TRUE	1	2787791	1196524	3984315	0.303688	TRUE	1	10891300	2228467	0.169856	TRUE	1	579952	TRUE	1	0.0442044
HCC_ShH-216469	15711563	TRUE	1	14559521	TRUE	1	2640717	0.181374	TRUE	1	9037990	0.620761	527156	TRUE	1	787718	0.0541033	TRUE	1	73795	178201	251996	0.478029	TRUE	1	466809	60347	0.114477	TRUE	1	101498	TRUE	1	0.192539
HCC_ShH-216517	30494796	TRUE	1	29858862	TRUE	1	10706	0.000358554	TRUE	1	24951262	0.83564	4255217	TRUE	1	1688808	0.0565597	TRUE	1	424205	2229930	2654135	0.623737	TRUE	1	3996429	258788	0.0608166	TRUE	1	1142384	TRUE	1	0.268467
HCC_ShH-216540	34353725	TRUE	1	33586957	TRUE	1	89835	0.0026747	TRUE	1	21775218	0.648324	2051267	TRUE	1	1470034	0.043768	TRUE	1	155511	1372396	1527907	0.74486	TRUE	1	1966305	84962	0.0414193	TRUE	1	711079	TRUE	1	0.346654
HCC_ShH-216565	35166925	TRUE	1	32350337	TRUE	1	2068	6.39251e-05	TRUE	1	29169513	0.901676	7438207	TRUE	1	263886	0.00815713	TRUE	1	1313015	1955588	3268603	0.439434	TRUE	1	6325426	1112781	0.149603	TRUE	1	1252935	TRUE	1	0.168446
HCC_ShH-216652	32346571	TRUE	1	30734902	TRUE	1	42412	0.00137993	TRUE	1	27528441	0.895674	5113525	TRUE	1	380015	0.0123643	TRUE	1	770471	1879768	2650239	0.51828	TRUE	1	4497726	615799	0.120426	TRUE	1	1162673	TRUE	1	0.227372
HCC_ShH-216692	34537692	TRUE	1	33072078	TRUE	1	1065	3.22024e-05	TRUE	1	30144106	0.911467	10387292	TRUE	1	338354	0.0102308	TRUE	1	1991483	1740760	3732243	0.359309	TRUE	1	8747611	1639681	0.157855	TRUE	1	1012745	TRUE	1	0.0974985
HCC_ShH-216730	40445836	TRUE	1	38563846	TRUE	1	1275	3.30621e-05	TRUE	1	34818672	0.902884	8032453	TRUE	1	218832	0.00567454	TRUE	1	1349878	2376798	3726676	0.463952	TRUE	1	6970617	1061836	0.132193	TRUE	1	1450079	TRUE	1	0.180528
HCC_ShH-216733	37174004	TRUE	1	35968108	TRUE	1	1169	3.2501e-05	TRUE	1	33215880	0.923481	13630720	TRUE	1	189972	0.00528168	TRUE	1	2899826	1274226	4174052	0.306224	TRUE	1	11063478	2567242	0.188342	TRUE	1	635787	TRUE	1	0.0466437
HCC_ShH-216749	39011285	TRUE	1	37106305	TRUE	1	965	2.60064e-05	TRUE	1	30244259	0.815071	8920857	TRUE	1	2905410	0.0782996	TRUE	1	1062196	4230794	5292990	0.593328	TRUE	1	8133192	787665	0.0882948	TRUE	1	2345361	TRUE	1	0.262908
HCC_ShHW-161444	33286121	TRUE	1	31434156	TRUE	1	5163	0.000164248	TRUE	1	23424994	0.745208	4826968	TRUE	1	4299905	0.136791	TRUE	1	437583	2150147	2587730	0.536098	TRUE	1	4579843	247125	0.0511967	TRUE	1	1208906	TRUE	1	0.250448
HCC_ShHW-224990	39525429	TRUE	1	36805814	TRUE	1	2791	7.58304e-05	TRUE	1	31329338	0.851206	19160592	TRUE	1	2927162	0.0795299	TRUE	1	1212731	7405710	8618441	0.4498	TRUE	1	18700766	459826	0.0239985	TRUE	1	3914837	TRUE	1	0.204317
HCC_ShHW-225048	37750430	TRUE	1	35680506	TRUE	1	5391	0.000151091	TRUE	1	26523356	0.743357	7122491	TRUE	1	3662844	0.102657	TRUE	1	657049	2789552	3446601	0.483904	TRUE	1	6800748	321743	0.0451728	TRUE	1	1563169	TRUE	1	0.219469
HCC_ShHW-225050	42907256	TRUE	1	40130941	TRUE	1	2957	7.36838e-05	TRUE	1	31403592	0.782528	13820842	TRUE	1	3339342	0.0832112	TRUE	1	1137489	5435699	6573188	0.4756	TRUE	1	13291211	529631	0.0383212	TRUE	1	3038834	TRUE	1	0.219873
HCC_ShHW-225181	42651229	TRUE	1	40601163	TRUE	1	22171	0.000546068	TRUE	1	18879159	0.464991	1604092	TRUE	1	7380153	0.181772	TRUE	1	266277	499963	766240	0.477678	TRUE	1	1387057	217035	0.135301	TRUE	1	375741	TRUE	1	0.234239
HCC_ShHW-225315	37203000	TRUE	1	36125499	TRUE	1	584	1.61659e-05	TRUE	1	32679436	0.904609	11964263	TRUE	1	182815	0.00506055	TRUE	1	2693925	355470	3049395	0.254875	TRUE	1	9427879	2536384	0.211997	TRUE	1	138827	TRUE	1	0.0116035
HCC-ChQ10	32761316	TRUE	1	29690944	TRUE	1	7818367	0.263325	TRUE	1	6115582	0.205975	1888830	TRUE	1	837924	0.0282215	TRUE	1	190119	1136540	1326659	0.702371	TRUE	1	1767113	121717	0.0644404	TRUE	1	747698	TRUE	1	0.395852
HCC-ChQ4	41083351	TRUE	1	35564687	TRUE	1	13437195	0.377824	TRUE	1	2353013	0.0661615	162890	FALSE	0	709660	0.0199541	TRUE	0	26668	44831	71499	0.43894	TRUE	0	143852	19038	0.116876	TRUE	0	32094	FALSE	0	0.197029
HCC-ChQ5	34804826	TRUE	1	30973459	TRUE	1	7224101	0.233235	TRUE	1	4376964	0.141313	231508	FALSE	0	599109	0.0193427	TRUE	0	32073	81781	113854	0.491793	TRUE	0	203766	27742	0.119832	TRUE	0	58123	FALSE	0	0.251063
HCC-ShHW-223960	25548828	TRUE	1	24577709	TRUE	1	1770	7.20165e-05	TRUE	1	19514553	0.793994	10537935	TRUE	1	104285	0.00424307	TRUE	1	2187716	353090	2540806	0.24111	TRUE	1	8843605	1694330	0.160784	TRUE	1	161292	TRUE	1	0.0153058
HCC-ShHW-224900	30219443	TRUE	1	28936136	TRUE	1	26882	0.000929011	TRUE	1	18665845	0.64507	9625606	TRUE	1	6136082	0.212056	TRUE	1	1475132	1856648	3331780	0.346137	TRUE	1	8417862	1207744	0.125472	TRUE	1	909434	TRUE	1	0.0944807
HCC-ShHW-224934	26064384	TRUE	1	25140692	TRUE	1	3294	0.000131023	TRUE	1	21777512	0.866226	16164113	TRUE	1	25580	0.00101747	TRUE	1	3698790	466514	4165304	0.257688	TRUE	1	12601692	3562421	0.220391	TRUE	1	318786	TRUE	1	0.0197218
HCC-ShHW-224995	25665749	TRUE	1	24193592	TRUE	1	1769	7.31185e-05	TRUE	1	14038449	0.580255	2711481	TRUE	1	5709041	0.235973	TRUE	1	496132	335944	832076	0.306871	TRUE	1	2289305	422176	0.155699	TRUE	1	167257	TRUE	1	0.0616847
HCC-ShHW-225464	22401368	TRUE	1	20719724	TRUE	1	646	3.1178e-05	TRUE	1	18426284	0.889311	9157881	TRUE	1	76514	0.00369281	TRUE	1	1922238	429859	2352097	0.256839	TRUE	1	7321392	1836489	0.200536	TRUE	1	108713	TRUE	1	0.011871
HCC-ShHW-225484	21898621	TRUE	1	21123155	TRUE	1	447	2.11616e-05	TRUE	1	17201788	0.814357	9377095	TRUE	1	34146	0.00161652	TRUE	1	2038481	385523	2424004	0.258503	TRUE	1	7543060	1834035	0.195587	TRUE	1	234668	TRUE	1	0.0250257
HCC-ShHW-351556	33251188	TRUE	1	27956470	TRUE	1	7786	0.000278504	TRUE	1	15134922	0.541375	1329797	TRUE	1	2354676	0.0842265	TRUE	1	211575	349431	561006	0.421873	TRUE	1	1163214	166583	0.125269	TRUE	1	221925	TRUE	1	0.166886
HCC-ShHW-352272	27075928	TRUE	1	23610338	TRUE	1	7248	0.000306984	TRUE	1	12990275	0.550194	1693092	TRUE	1	1534329	0.0649855	TRUE	1	364478	74815	439293	0.259462	TRUE	1	1350370	342722	0.202424	TRUE	1	84937	FALSE	0	0.0501668
HCC-ShHW-352347	29029100	TRUE	1	25975601	TRUE	1	2457	9.45888e-05	TRUE	1	16004695	0.616143	2115131	TRUE	1	1476772	0.0568523	TRUE	1	433341	132048	565389	0.267307	TRUE	1	1729562	385569	0.182291	TRUE	1	69664	FALSE	0	0.032936
HCC-ShHW-352598	28774450	TRUE	1	24520221	TRUE	1	6563	0.000267657	TRUE	1	9050724	0.369113	1357073	TRUE	1	3209635	0.130897	TRUE	1	276912	92012	368924	0.271853	TRUE	1	1115289	241784	0.178166	TRUE	1	94668	FALSE	0	0.069759
LUAD-2238350	74844778	TRUE	1	71010021	TRUE	1	4932357	0.06946	TRUE	1	58333887	0.821488	12462111	TRUE	1	980256	0.0138045	TRUE	1	1253771	7740190	8993961	0.721704	TRUE	1	11712335	749776	0.0601644	TRUE	1	4473184	TRUE	1	0.358943
LUAD-2359535	29188568	TRUE	1	21723240	TRUE	1	203677	0.009376	TRUE	1	17846297	0.82153	2030250	TRUE	1	1808303	0.0832428	TRUE	1	153333	1362887	1516220	0.746814	TRUE	1	1973261	56989	0.0280699	TRUE	1	665271	TRUE	1	0.327679
LUAD-2359570	36342768	TRUE	1	32481876	TRUE	1	2531036	0.0779215	TRUE	1	21131376	0.650559	1944776	TRUE	1	3463554	0.10663	TRUE	1	194386	1126864	1321250	0.679384	TRUE	1	1825816	118960	0.061169	TRUE	1	638958	TRUE	1	0.328551
LUAD-2378877	37164615	TRUE	1	34187667	TRUE	1	404041	0.0118183	TRUE	1	30817536	0.901423	5972810	TRUE	1	1247473	0.036489	TRUE	1	503050	3961082	4464132	0.747409	TRUE	1	5767222	205588	0.0344206	TRUE	1	2381970	TRUE	1	0.398802
LUAD-2379000	42624014	TRUE	1	40370321	TRUE	1	1492007	0.036958	TRUE	1	29603800	0.733306	2481745	TRUE	1	894798	0.0221647	TRUE	1	184034	1729597	1913631	0.771083	TRUE	1	2396404	85341	0.0343875	TRUE	1	882673	TRUE	1	0.355666
LUAD-2379197	40199201	TRUE	1	38135885	TRUE	1	1910123	0.0500873	TRUE	1	26854386	0.704176	4579614	TRUE	1	1065600	0.0279422	TRUE	1	310975	3330023	3640998	0.795045	TRUE	1	4456704	122910	0.0268385	TRUE	1	1715385	TRUE	1	0.37457
LUAD-2379223	75050882	TRUE	1	71942024	TRUE	1	1108	1.54013e-05	TRUE	1	61834147	0.8595	9368557	TRUE	1	1781455	0.0247624	TRUE	1	750008	6095652	6845660	0.730706	TRUE	1	8967219	401338	0.0428388	TRUE	1	3373914	TRUE	1	0.360132
LUAD-2379275	33325698	TRUE	1	30383229	TRUE	1	3513632	0.115644	TRUE	1	24902579	0.819616	4374213	TRUE	1	165096	0.00543379	TRUE	1	304582	3316931	3621513	0.827923	TRUE	1	4291309	82904	0.0189529	TRUE	1	1945186	TRUE	1	0.444694
LUAD-2380731	33717586	TRUE	1	31181972	TRUE	1	339648	0.0108924	TRUE	1	14546252	0.466496	2928916	TRUE	1	1149961	0.036879	TRUE	1	202441	2167360	2369801	0.809105	TRUE	1	2884533	44383	0.0151534	TRUE	1	1283061	TRUE	1	0.438067
LUAD-2380982	40444909	TRUE	1	37509456	TRUE	1	513334	0.0136855	TRUE	1	34860318	0.929374	6905895	TRUE	1	170522	0.00454611	TRUE	1	485387	5213410	5698797	0.825208	TRUE	1	6802114	103781	0.0150279	TRUE	1	3078750	TRUE	1	0.445815
LUAD-2381001	34017203	TRUE	1	31181322	TRUE	1	807190	0.025887	TRUE	1	27109991	0.86943	5385336	TRUE	1	720713	0.0231136	TRUE	1	388457	3999698	4388155	0.814834	TRUE	1	5282498	102838	0.0190959	TRUE	1	2329414	TRUE	1	0.432548
LUAD-2381036	30954834	TRUE	1	29011660	TRUE	1	1136125	0.039161	TRUE	1	21502897	0.741181	4417780	TRUE	1	1872545	0.0645446	TRUE	1	345666	3149399	3495065	0.791136	TRUE	1	4251550	166230	0.0376275	TRUE	1	1879568	TRUE	1	0.425455
LUAD-2381280	180663858	TRUE	1	148949154	TRUE	1	14007982	0.0940454	TRUE	1	103822872	0.697036	9112082	TRUE	1	6736950	0.0452299	TRUE	1	576507	6947124	7523631	0.825676	TRUE	1	8935332	176750	0.0193973	TRUE	1	4066513	TRUE	1	0.446277
LUAD-2381602	40739396	TRUE	1	38590845	TRUE	1	2253197	0.0583868	TRUE	1	29326920	0.759945	2966110	TRUE	1	2702605	0.0700323	TRUE	1	216410	2048134	2264544	0.763473	TRUE	1	2858361	107749	0.0363267	TRUE	1	1281078	TRUE	1	0.431905
LUAD-2381787	57243022	TRUE	1	46858050	TRUE	1	395164	0.00843321	TRUE	1	39688449	0.846993	6111524	TRUE	1	1091909	0.0233025	TRUE	1	439669	4471148	4910817	0.803534	TRUE	1	6002881	108643	0.0177767	TRUE	1	2663702	TRUE	1	0.435849
LUAD-2382152	48602818	TRUE	1	36788958	TRUE	1	303611	0.00825278	TRUE	1	30516647	0.829506	2577595	TRUE	1	1956259	0.0531752	TRUE	1	189732	1862811	2052543	0.796302	TRUE	1	2534883	42712	0.0165705	TRUE	1	1203497	TRUE	1	0.466907
LUAD-2382186	31854394	TRUE	1	29314131	TRUE	1	1597659	0.0545013	TRUE	1	25223677	0.860461	4252461	TRUE	1	339882	0.0115945	TRUE	1	487993	2173223	2661216	0.625806	TRUE	1	3951715	300746	0.0707228	TRUE	1	1217420	TRUE	1	0.286286
LUAD-2382392	61798902	TRUE	1	57106248	TRUE	1	39893	0.000698575	TRUE	1	48168455	0.843488	3422664	TRUE	1	1132581	0.0198329	TRUE	1	280841	2293741	2574582	0.752216	TRUE	1	3271547	151117	0.0441519	TRUE	1	1181553	TRUE	1	0.345214
LUAD-2382462	34272763	TRUE	1	29275656	TRUE	1	262720	0.00897401	TRUE	1	26367744	0.900671	1770604	TRUE	1	272259	0.00929984	TRUE	1	170014	1066076	1236090	0.698118	TRUE	1	1654200	116404	0.0657425	TRUE	1	577916	TRUE	1	0.326395
LUAD-2383484	32912796	TRUE	1	29977816	TRUE	1	1955407	0.0652285	TRUE	1	26589224	0.886963	4451723	TRUE	1	206512	0.00688883	TRUE	1	335953	3441540	3777493	0.848546	TRUE	1	4392646	59077	0.0132706	TRUE	1	2186663	TRUE	1	0.491195
LUAD-2383900	29332788	TRUE	1	25143052	TRUE	1	56687	0.00225458	TRUE	1	19853647	0.789628	1924222	TRUE	1	3852200	0.153211	TRUE	1	148688	1307863	1456551	0.756956	TRUE	1	1857547	66675	0.0346504	TRUE	1	621761	TRUE	1	0.323123
LUAD-2384213	31496853	TRUE	1	30109517	TRUE	1	769424	0.0255542	TRUE	1	26082537	0.866256	5370694	TRUE	1	709483	0.0235634	TRUE	1	341711	4207758	4549469	0.847091	TRUE	1	5248859	121835	0.0226852	TRUE	1	2732068	TRUE	1	0.508699
LUAD-2384220	32871064	TRUE	1	30723967	TRUE	1	228815	0.00744744	TRUE	1	28437872	0.925592	19727623	TRUE	1	101954	0.00331839	TRUE	1	4283980	1172758	5456738	0.276604	TRUE	1	16218816	3508807	0.177863	TRUE	1	201555	TRUE	1	0.0102169
LUAD-2384340	35383897	TRUE	1	33623122	TRUE	1	2360	7.01898e-05	TRUE	1	28368833	0.84373	4742384	TRUE	1	1051200	0.0312642	TRUE	1	418581	3120996	3539577	0.746371	TRUE	1	4494024	248360	0.0523703	TRUE	1	1593271	TRUE	1	0.335964
LUAD-2384356	34903224	TRUE	1	32940056	TRUE	1	591	1.79417e-05	TRUE	1	28242512	0.857391	3298639	TRUE	1	1313576	0.0398778	TRUE	1	246938	2330902	2577840	0.781486	TRUE	1	3178635	120004	0.0363799	TRUE	1	1181988	TRUE	1	0.358326
LUAD-2384360	29587145	TRUE	1	27415776	TRUE	1	1587873	0.0579182	TRUE	1	23850490	0.869955	5610621	TRUE	1	219059	0.00799025	TRUE	1	376863	4298762	4675625	0.833352	TRUE	1	5497067	113554	0.0202391	TRUE	1	2564303	TRUE	1	0.457044
LUAD-2386025	86666059	TRUE	1	81566683	TRUE	1	1996390	0.0244756	TRUE	1	65805019	0.806763	17790912	TRUE	1	1617190	0.0198266	TRUE	1	3026935	4886454	7913389	0.4448	TRUE	1	15548711	2242201	0.126031	TRUE	1	2317044	TRUE	1	0.130238
LUAD-2386178	26650160	TRUE	1	25129669	TRUE	1	5113946	0.203502	TRUE	1	14640782	0.582609	2651883	TRUE	1	85362	0.00339686	TRUE	1	484277	263745	748022	0.282072	TRUE	1	2141897	509986	0.192311	TRUE	1	96509	FALSE	0	0.0363926
LUAD-2386185	33024409	TRUE	1	31379693	TRUE	1	2109659	0.0672301	TRUE	1	23577429	0.751359	3649592	TRUE	1	1470172	0.0468511	TRUE	1	260474	2597951	2858425	0.783218	TRUE	1	3526170	123422	0.033818	TRUE	1	1539018	TRUE	1	0.421696
LUAD-2386375	24738281	TRUE	1	23036293	TRUE	1	1236472	0.053675	TRUE	1	15787882	0.685348	2721977	TRUE	1	817763	0.0354989	TRUE	1	224339	1849578	2073917	0.761916	TRUE	1	2627049	94928	0.0348747	TRUE	1	1096754	TRUE	1	0.402926
LUAD-2386387	27052316	TRUE	1	24110058	TRUE	1	408071	0.0169253	TRUE	1	20721334	0.859448	2751110	TRUE	1	303429	0.0125852	TRUE	1	413577	981220	1394797	0.506994	TRUE	1	2407400	343710	0.124935	TRUE	1	544632	TRUE	1	0.197968
LUAD-2387760	31699804	TRUE	1	29808258	TRUE	1	2188382	0.0734153	TRUE	1	18945099	0.635565	3188815	TRUE	1	2078098	0.0697155	TRUE	1	266925	2186328	2453253	0.769331	TRUE	1	3066852	121963	0.0382471	TRUE	1	1262528	TRUE	1	0.395924
LUAD-2388850	27454235	TRUE	1	26053582	TRUE	1	644280	0.024729	TRUE	1	22073532	0.847236	6055837	TRUE	1	691949	0.0265587	TRUE	1	441491	4503386	4944877	0.816547	TRUE	1	5860450	195387	0.0322642	TRUE	1	2912352	TRUE	1	0.480917
LUAD-2391958	34015986	TRUE	1	32563924	TRUE	1	3684	0.000113131	TRUE	1	25076970	0.770084	4773460	TRUE	1	1139825	0.0350027	TRUE	1	416664	3122608	3539272	0.741448	TRUE	1	4534472	238988	0.050066	TRUE	1	1577433	TRUE	1	0.330459
LUAD-2394433	38865280	TRUE	1	37197909	TRUE	1	1651	4.43842e-05	TRUE	1	26028727	0.699736	5015654	TRUE	1	2505317	0.067351	TRUE	1	445695	3020763	3466458	0.691128	TRUE	1	4728363	287291	0.0572789	TRUE	1	1620274	TRUE	1	0.323043
NC_ChQ-10	35195062	TRUE	1	32676609	TRUE	1	6001552	0.183665	TRUE	1	14301040	0.437654	3451188	TRUE	1	6607955	0.202223	TRUE	1	223375	2427665	2651040	0.768153	TRUE	1	3332311	118877	0.0344452	TRUE	1	1522445	TRUE	1	0.441137
NC_ChQ-11	33244790	TRUE	1	30922915	TRUE	1	7151890	0.231281	TRUE	1	14295416	0.462292	3926327	TRUE	1	4372992	0.141416	TRUE	1	221488	3020008	3241496	0.82558	TRUE	1	3815285	111042	0.0282814	TRUE	1	2011998	TRUE	1	0.512438
NC_ChQ-21	13710259	TRUE	1	8413514	TRUE	1	431592	0.0512975	TRUE	1	2380743	0.282967	131418	FALSE	0	415581	0.0493945	TRUE	0	26031	13590	39621	0.301488	TRUE	0	105715	25703	0.195582	TRUE	0	12179	FALSE	0	0.0926738
NC_ChQ-23	21397534	TRUE	1	10371725	TRUE	1	713743	0.0688162	TRUE	1	2597183	0.25041	143879	FALSE	0	158712	0.0153024	TRUE	0	30926	7437	38363	0.266634	TRUE	0	116813	27066	0.188116	TRUE	0	8191	FALSE	0	0.0569298
NC_ChQ-24	37750610	TRUE	1	32219703	TRUE	1	12243059	0.379987	TRUE	1	8029331	0.249206	946996	TRUE	1	1586669	0.0492453	TRUE	1	157279	235012	392291	0.414248	TRUE	1	804678	142318	0.150284	TRUE	1	165151	TRUE	1	0.174395
NC_ChQ-25	35022313	TRUE	1	32907690	TRUE	1	1457484	0.0442901	TRUE	1	1380830	0.0419607	317716	FALSE	0	2049516	0.0622808	TRUE	0	56080	39743	95823	0.3016	TRUE	0	232271	85445	0.268935	TRUE	0	23455	FALSE	0	0.0738238
NC_ChQ-26	35016164	TRUE	1	28996245	TRUE	1	1565349	0.0539845	TRUE	1	7423878	0.256029	670866	TRUE	1	6349927	0.218991	TRUE	1	110111	142771	252882	0.376949	TRUE	1	534465	136401	0.203321	TRUE	1	102511	TRUE	1	0.152804
NC_ChQ-27	30132943	TRUE	1	20248140	TRUE	1	606760	0.0299662	TRUE	1	3972321	0.196182	636300	TRUE	1	7837989	0.387097	TRUE	1	119444	76557	196001	0.308032	TRUE	1	496500	139800	0.219708	TRUE	1	45409	FALSE	0	0.0713641
NC_ChQ-28	90147476	TRUE	1	45267123	TRUE	1	26386660	0.58291	FALSE	0	6601894	0.145843	803258	TRUE	0	400218	0.00884125	TRUE	0	53663	603670	657333	0.818334	TRUE	0	768982	34276	0.0426712	TRUE	0	445280	TRUE	0	0.554342
NC_ChQ-29	44124088	TRUE	1	30072545	TRUE	1	1382705	0.045979	TRUE	1	7216222	0.23996	536180	TRUE	1	5089664	0.169246	TRUE	1	102443	63250	165693	0.309025	TRUE	1	427755	108425	0.202218	TRUE	1	56630	FALSE	0	0.105618
NC_ChQ-35	32958692	TRUE	1	30019801	TRUE	1	4390973	0.146269	TRUE	1	5483460	0.182661	1996716	TRUE	1	1228026	0.0409072	TRUE	1	140394	1453137	1593531	0.798076	TRUE	1	1927286	69430	0.0347721	TRUE	1	1012498	TRUE	1	0.507082
NC_ChQ-36	37432603	TRUE	1	32734941	TRUE	1	9740311	0.297551	TRUE	1	8777685	0.268144	2615401	TRUE	1	1088343	0.0332471	TRUE	1	393388	968678	1362066	0.520787	TRUE	1	2308755	306646	0.117246	TRUE	1	600393	TRUE	1	0.229561
NC_ChQ-40	40289181	TRUE	1	36317676	TRUE	1	16095397	0.443184	TRUE	1	3713748	0.102257	730211	TRUE	1	1167084	0.0321354	TRUE	1	131208	129884	261092	0.357557	TRUE	1	601863	128348	0.175768	TRUE	1	86180	FALSE	0	0.118021
NC_ChQ-49	23812662	TRUE	1	11438624	TRUE	1	2216540	0.193777	TRUE	1	2711276	0.237028	391008	FALSE	0	186071	0.0162669	TRUE	0	42221	211846	254067	0.649774	TRUE	0	355380	35628	0.0911183	TRUE	0	150853	TRUE	0	0.385805
NC_ChQ-51	43669777	TRUE	1	39294154	TRUE	1	8114420	0.206505	TRUE	1	15098428	0.384241	2959813	TRUE	1	4636246	0.117988	TRUE	1	314133	1604256	1918389	0.648145	TRUE	1	2711552	248261	0.0838773	TRUE	1	1173886	TRUE	1	0.396608
NC_ChQ-52	35737203	TRUE	1	33302372	TRUE	1	3206675	0.0962897	TRUE	1	19244345	0.577867	6495039	TRUE	1	2120461	0.063673	TRUE	1	1229290	1211203	2440493	0.375747	TRUE	1	5376700	1118339	0.172184	TRUE	1	827386	TRUE	1	0.127387
NC_ChQ-58	44050304	TRUE	1	20301853	TRUE	1	5600016	0.275838	TRUE	1	5342353	0.263146	703889	TRUE	1	122604	0.00603905	TRUE	1	46741	534918	581659	0.82635	TRUE	1	680615	23274	0.0330649	TRUE	1	376590	TRUE	1	0.535013
NC_ChQ-61	37519475	TRUE	1	32549177	TRUE	1	13397381	0.411604	TRUE	1	6811272	0.209261	959212	TRUE	1	2405669	0.0739088	TRUE	1	191106	104649	295755	0.308331	TRUE	1	792573	166639	0.173725	TRUE	1	66547	FALSE	0	0.0693767
NC_ChQ-65	32255770	TRUE	1	28447239	TRUE	1	8390717	0.294957	TRUE	1	5807744	0.204158	1738525	TRUE	1	1190466	0.0418482	TRUE	1	190307	959056	1149363	0.661114	TRUE	1	1600425	138100	0.0794352	TRUE	1	637426	TRUE	1	0.366648
NC_ChQ-70	35555343	TRUE	1	32720258	TRUE	1	10182219	0.31119	TRUE	1	8997813	0.274992	2029382	TRUE	1	5017862	0.153356	TRUE	1	281113	766081	1047194	0.516016	TRUE	1	1792237	237145	0.116856	TRUE	1	576135	TRUE	1	0.283897
NC_ChQ-71	36271598	TRUE	1	32887414	TRUE	1	7106443	0.216084	TRUE	1	13224242	0.402106	2518994	TRUE	1	3426293	0.104182	TRUE	1	273184	1378746	1651930	0.65579	TRUE	1	2304503	214491	0.0851495	TRUE	1	1017702	TRUE	1	0.404011
NC_HaiB-1	26812165	TRUE	1	24796957	TRUE	1	729050	0.0294008	TRUE	1	7137274	0.287829	516866	TRUE	1	15281420	0.616262	FALSE	0	22349	234205	256554	0.496365	TRUE	0	438483	78383	0.151651	TRUE	0	153726	TRUE	0	0.297419
NC_HaiB-2	31054098	TRUE	1	29038888	TRUE	1	2690268	0.0926436	TRUE	1	11177388	0.384911	1213880	TRUE	1	2718467	0.0936147	TRUE	1	225816	230079	455895	0.375568	TRUE	1	987868	226012	0.18619	TRUE	1	137167	TRUE	1	0.112999
NC_HaiB-3	33430180	TRUE	1	29784654	TRUE	1	4916515	0.165069	TRUE	1	10872193	0.365027	811957	TRUE	1	2783402	0.0934509	TRUE	1	55998	530334	586332	0.722122	TRUE	1	757536	54421	0.0670245	TRUE	1	330124	TRUE	1	0.406578
NC_PKU-2359973	31926757	TRUE	1	30309203	TRUE	1	571944	0.0188703	TRUE	1	26928732	0.888467	6015171	TRUE	1	624461	0.020603	TRUE	1	395254	4603394	4998648	0.831007	TRUE	1	5912352	102819	0.0170933	TRUE	1	2898747	TRUE	1	0.481906
NC_PKU-2392860	44580437	TRUE	1	42106598	TRUE	1	2332250	0.0553892	TRUE	1	33239711	0.789418	5553979	TRUE	1	2022075	0.0480228	TRUE	1	320963	4176189	4497152	0.809717	TRUE	1	5479106	74873	0.013481	TRUE	1	2387988	TRUE	1	0.42996
NC_PKU-2392931	38182385	TRUE	1	36320425	TRUE	1	399902	0.0110104	TRUE	1	32933120	0.906738	7423698	TRUE	1	821931	0.02263	TRUE	1	502412	5845058	6347470	0.855028	TRUE	1	7303458	120240	0.0161968	TRUE	1	3798421	TRUE	1	0.511662
NC_PKU-2392932	35597232	TRUE	1	34326091	TRUE	1	638898	0.0186126	TRUE	1	28472152	0.829461	6996599	TRUE	1	889075	0.0259009	TRUE	1	416953	5424415	5841368	0.834887	TRUE	1	6888658	107941	0.0154276	TRUE	1	3041854	TRUE	1	0.434762
NC_PKU-2392993	20784140	TRUE	1	19391973	TRUE	1	512161	0.026411	TRUE	1	16302334	0.840674	4358743	TRUE	1	610950	0.0315053	TRUE	1	272400	3338619	3611019	0.828454	TRUE	1	4281736	77007	0.0176672	TRUE	1	2098977	TRUE	1	0.481556
NC_PKU-2394780	55902383	TRUE	1	53044854	TRUE	1	2766276	0.0521498	TRUE	1	37218608	0.701644	7167354	TRUE	1	1261843	0.0237882	TRUE	1	434817	5285878	5720695	0.79816	TRUE	1	7014838	152516	0.0212793	TRUE	1	3097482	TRUE	1	0.432165
NC_PKU-2396996	23526415	TRUE	1	20275237	TRUE	1	9780023	0.482363	TRUE	1	3586271	0.176879	522731	TRUE	1	1110825	0.0547873	TRUE	1	84129	116484	200613	0.383779	TRUE	1	448069	74662	0.142831	TRUE	1	57183	FALSE	0	0.109393
NC_PKU-2397512	22626702	TRUE	1	20306759	TRUE	1	146633	0.0072209	TRUE	1	15697906	0.773038	1022884	TRUE	1	2788622	0.137325	TRUE	1	75831	660025	735856	0.719393	TRUE	1	993788	29096	0.0284451	TRUE	1	311160	TRUE	1	0.304199
NC_PKU-2397878	24502812	TRUE	1	22811296	TRUE	1	973150	0.0426609	TRUE	1	16992420	0.744913	4763863	TRUE	1	471110	0.0206525	TRUE	1	278224	3588350	3866574	0.811647	TRUE	1	4688217	75646	0.0158791	TRUE	1	1920095	TRUE	1	0.403054
NC_PKU-2399728	32669754	TRUE	1	31350230	TRUE	1	1944239	0.0620167	TRUE	1	18365274	0.58581	3758071	TRUE	1	1259870	0.0401869	TRUE	1	230407	2731749	2962156	0.788212	TRUE	1	3667367	90704	0.0241358	TRUE	1	1394306	TRUE	1	0.371016
NC_PKU-28	23253007	TRUE	1	21446971	TRUE	1	1876026	0.0874728	TRUE	1	16141112	0.752606	2723055	TRUE	1	1989433	0.0927606	TRUE	1	209288	1789415	1998703	0.733993	TRUE	1	2643483	79572	0.0292216	TRUE	1	1132462	TRUE	1	0.415879
NC_PKU-33	25631484	TRUE	1	22857048	TRUE	1	90512	0.00395992	TRUE	1	20903755	0.914543	5850499	TRUE	1	589547	0.0257928	TRUE	1	382537	4557226	4939763	0.844332	TRUE	1	5766637	83862	0.0143342	TRUE	1	2987443	TRUE	1	0.51063
NC_PKU-34	36825560	TRUE	1	33724363	TRUE	1	519294	0.0153982	TRUE	1	30407186	0.901639	6930786	TRUE	1	458033	0.0135817	TRUE	1	462730	5261356	5724086	0.825893	TRUE	1	6817405	113381	0.016359	TRUE	1	3254820	TRUE	1	0.469618
NC_PKU-37	48444175	TRUE	1	43628883	TRUE	1	2650866	0.0607594	TRUE	1	35689774	0.818031	5299668	TRUE	1	1810512	0.041498	TRUE	1	324947	4053436	4378383	0.826162	TRUE	1	5220134	79534	0.0150074	TRUE	1	2555251	TRUE	1	0.482153
NC_PKU-48	31132493	TRUE	1	30438283	TRUE	1	743	2.441e-05	TRUE	1	21001393	0.689966	3686287	TRUE	1	1543209	0.0506996	TRUE	1	340637	2327928	2668565	0.723917	TRUE	1	3477104	209183	0.0567463	TRUE	1	1229996	TRUE	1	0.333668
NC_PKU-50	39768468	TRUE	1	37166089	TRUE	1	523053	0.0140734	TRUE	1	32731657	0.880686	9032282	TRUE	1	1669499	0.04492	TRUE	1	573027	6751720	7324747	0.810952	TRUE	1	8875118	157164	0.0174003	TRUE	1	4290068	TRUE	1	0.474971
NC_PKU-56	28673208	TRUE	1	26492006	TRUE	1	275177	0.0103872	TRUE	1	23622679	0.891691	6206446	TRUE	1	424381	0.0160192	TRUE	1	427078	4723966	5151044	0.829951	TRUE	1	6107461	98985	0.0159487	TRUE	1	2939086	TRUE	1	0.473554
NC_PKU-69	32140209	TRUE	1	28807207	TRUE	1	297461	0.0103259	TRUE	1	26039869	0.903936	6863178	TRUE	1	487659	0.0169284	TRUE	1	452375	4961844	5414219	0.788879	TRUE	1	6770149	93029	0.0135548	TRUE	1	3140224	TRUE	1	0.457547
NC_PKU-8111237	38128121	TRUE	1	36556014	TRUE	1	1352307	0.0369927	TRUE	1	14108713	0.385948	4315434	TRUE	1	521604	0.0142686	TRUE	1	271988	3287715	3559703	0.824877	TRUE	1	4223401	92033	0.0213265	TRUE	1	1761578	TRUE	1	0.408204
NC_ShH-1	35940163	TRUE	1	32668816	TRUE	1	7514027	0.230006	TRUE	1	14556493	0.445578	3364232	TRUE	1	2282655	0.0698726	TRUE	1	352544	1872426	2224970	0.66136	TRUE	1	3119568	244664	0.0727251	TRUE	1	1241068	TRUE	1	0.368901
NC_ShH-14	40635010	TRUE	1	37853420	TRUE	1	8060861	0.212949	TRUE	1	16845077	0.445008	2313236	TRUE	1	742392	0.0196123	TRUE	1	322719	761527	1084246	0.468714	TRUE	1	2007321	305915	0.132245	TRUE	1	479043	TRUE	1	0.207088
NC_ShH-15	49348587	TRUE	1	46728419	TRUE	1	6517456	0.139475	TRUE	1	12642728	0.270558	2116852	TRUE	1	743405	0.0159091	TRUE	1	338162	552831	890993	0.420905	TRUE	1	1800014	316838	0.149674	TRUE	1	326562	TRUE	1	0.154268
NC_ShH-16	30141341	TRUE	1	28003593	TRUE	1	8277373	0.295583	TRUE	1	10628419	0.379538	2310288	TRUE	1	1343402	0.0479725	TRUE	1	331331	767560	1098891	0.475651	TRUE	1	1998987	311301	0.134746	TRUE	1	490814	TRUE	1	0.212447
NC_ShH-17	33886406	TRUE	1	32195573	TRUE	1	4220328	0.131084	TRUE	1	16522086	0.513179	4829267	TRUE	1	1574954	0.0489183	TRUE	1	868516	928537	1797053	0.372117	TRUE	1	4001556	827711	0.171395	TRUE	1	574776	TRUE	1	0.119019
NC_ShH-19	41116431	TRUE	1	38279831	TRUE	1	5923160	0.154733	TRUE	1	24851864	0.649216	4351231	TRUE	1	2848539	0.0744136	TRUE	1	297070	3195997	3493067	0.802777	TRUE	1	4188332	162899	0.0374375	TRUE	1	2018322	TRUE	1	0.463851
NC_ShH-1903250135	40127875	TRUE	1	38995875	TRUE	1	45778	0.00117392	TRUE	1	22516191	0.577399	2863899	TRUE	1	3841007	0.0984978	TRUE	1	398147	850682	1248829	0.436059	TRUE	1	2559324	304575	0.10635	TRUE	1	467045	TRUE	1	0.16308
NC_ShH-1903250204	27575919	TRUE	1	26930591	TRUE	1	53003	0.00196813	TRUE	1	13791636	0.512118	1574094	TRUE	1	1107758	0.0411338	TRUE	1	214504	595210	809714	0.5144	TRUE	1	1409401	164693	0.104627	TRUE	1	310054	TRUE	1	0.196973
NC_ShH-1903250374	26689069	TRUE	1	25801182	TRUE	1	2880	0.000111623	TRUE	1	19737014	0.764965	6519044	TRUE	1	2693844	0.104408	TRUE	1	1036555	1611855	2648410	0.406257	TRUE	1	5708105	810939	0.124395	TRUE	1	905818	TRUE	1	0.13895
NC_ShH-2	36533308	TRUE	1	31865650	TRUE	1	7259196	0.227806	TRUE	1	13087654	0.410714	2600990	TRUE	1	2545706	0.0798887	TRUE	1	182592	1843134	2025726	0.778829	TRUE	1	2486758	114232	0.0439187	TRUE	1	1168697	TRUE	1	0.449328
NC_ShH-20	35682409	TRUE	1	33125074	TRUE	1	12717673	0.383929	TRUE	1	7581482	0.228874	1430392	TRUE	1	2316048	0.0699183	TRUE	1	109838	992283	1102121	0.770503	TRUE	1	1365923	64469	0.0450709	TRUE	1	644594	TRUE	1	0.450642
NC_ShH-21	35515400	TRUE	1	32853942	TRUE	1	13254084	0.403424	TRUE	1	7160722	0.217956	1513946	TRUE	1	3838273	0.116828	TRUE	1	170243	758341	928584	0.613353	TRUE	1	1375829	138117	0.0912298	TRUE	1	504392	TRUE	1	0.333164
NC_ShH-22	34575780	TRUE	1	32419149	TRUE	1	9038695	0.278807	TRUE	1	3151227	0.0972026	737155	TRUE	1	2058589	0.0634992	TRUE	1	99600	273069	372669	0.50555	TRUE	1	649096	88059	0.119458	TRUE	1	192197	TRUE	1	0.260728
NC_ShH-23	29289188	TRUE	1	26434823	TRUE	1	8463635	0.32017	TRUE	1	8616090	0.325937	1416573	TRUE	1	1301209	0.0492233	TRUE	1	101197	1025535	1126732	0.795393	TRUE	1	1362121	54452	0.0384392	TRUE	1	682667	TRUE	1	0.481914
NC_ShH-24	35322572	TRUE	1	32377877	TRUE	1	9720220	0.300212	TRUE	1	11381880	0.351533	1602627	TRUE	1	1426486	0.0440574	TRUE	1	102886	1212149	1315035	0.82055	TRUE	1	1550875	51752	0.032292	TRUE	1	870043	TRUE	1	0.542886
NC_ShH-27	46201667	TRUE	1	43413210	TRUE	1	9190717	0.211703	TRUE	1	13655244	0.314541	2005645	TRUE	1	1083463	0.024957	TRUE	1	366865	346520	713385	0.355689	TRUE	1	1662879	342766	0.170901	TRUE	1	202430	TRUE	1	0.10093
NC_ShH-28	25391044	TRUE	1	23450593	TRUE	1	6709687	0.28612	TRUE	1	7776647	0.331618	567823	TRUE	1	481680	0.0205402	TRUE	1	50910	352716	403626	0.710831	TRUE	1	532276	35547	0.0626023	TRUE	1	229865	TRUE	1	0.404818
NC_ShH-3	37198212	TRUE	1	33699506	TRUE	1	4441647	0.131802	TRUE	1	17387512	0.515957	4091396	TRUE	1	3322770	0.0986	TRUE	1	360972	2557070	2918042	0.713214	TRUE	1	3837241	254155	0.0621194	TRUE	1	1671778	TRUE	1	0.408608
NC_ShH-31	40223543	TRUE	1	37487001	TRUE	1	9008814	0.240318	TRUE	1	16798813	0.448124	1759564	TRUE	1	2070524	0.0552331	TRUE	1	207187	881330	1088517	0.618629	TRUE	1	1604978	154586	0.0878547	TRUE	1	607007	TRUE	1	0.344976
NC_ShH-32	36191994	TRUE	1	33386443	TRUE	1	4173308	0.125	TRUE	1	21248008	0.636426	3427890	TRUE	1	2371114	0.0710203	TRUE	1	267665	2327454	2595119	0.75706	TRUE	1	3251903	175987	0.0513397	TRUE	1	1609443	TRUE	1	0.469514
NC_ShH-33	45823862	TRUE	1	42662304	TRUE	1	5907482	0.138471	TRUE	1	18972883	0.444722	3884821	TRUE	1	1547341	0.0362695	TRUE	1	633029	1213345	1846374	0.475279	TRUE	1	3392204	492617	0.126806	TRUE	1	752210	TRUE	1	0.193628
NC_ShH-34	43691806	TRUE	1	41862555	TRUE	1	4370774	0.104408	TRUE	1	10394581	0.248303	1659449	TRUE	1	1651142	0.039442	TRUE	1	191767	844747	1036514	0.624613	TRUE	1	1496772	162677	0.0980307	TRUE	1	523538	TRUE	1	0.315489
NC_ShH-37	34097333	TRUE	1	32392002	TRUE	1	5866001	0.181094	TRUE	1	11644220	0.359478	2725839	TRUE	1	515570	0.0159166	TRUE	1	412546	779615	1192161	0.437356	TRUE	1	2327439	398400	0.146157	TRUE	1	424981	TRUE	1	0.155908
NC_ShH-38	23572050	TRUE	1	22236566	TRUE	1	4825145	0.216991	TRUE	1	9807647	0.441059	2547974	TRUE	1	1013687	0.0455865	TRUE	1	425382	565509	990891	0.388894	TRUE	1	2109021	438953	0.172275	TRUE	1	393739	TRUE	1	0.15453
NC_ShH-4	32939073	TRUE	1	28884230	TRUE	1	8631390	0.298827	TRUE	1	9204066	0.318654	2542130	TRUE	1	5334157	0.184674	TRUE	1	284703	1240364	1525067	0.599917	TRUE	1	2286536	255594	0.100543	TRUE	1	853225	TRUE	1	0.335634
NC_ShH-42	26563622	TRUE	1	24027447	TRUE	1	7691930	0.320131	TRUE	1	5958356	0.247981	1063649	TRUE	1	1719731	0.0715736	TRUE	1	141340	489542	630882	0.59313	TRUE	1	961149	102500	0.0963664	TRUE	1	329186	TRUE	1	0.309487
NC_ShH-43	32486158	TRUE	1	29251331	TRUE	1	9755886	0.333519	TRUE	1	6157254	0.210495	1160258	TRUE	1	2432653	0.0831638	TRUE	1	179408	401268	580676	0.500471	TRUE	1	1018974	141284	0.121769	TRUE	1	256286	TRUE	1	0.220887
NC_ShH-5	35631028	TRUE	1	32882705	TRUE	1	5484070	0.166777	TRUE	1	12125161	0.36874	2946392	TRUE	1	8486278	0.258077	TRUE	1	262990	1784626	2047616	0.694957	TRUE	1	2767756	178636	0.0606287	TRUE	1	1189689	TRUE	1	0.403778
NC_ShH-50	22904523	TRUE	1	20275875	TRUE	1	11390367	0.561769	FALSE	0	2463666	0.121507	405533	FALSE	0	1368089	0.0674737	TRUE	0	72687	88309	160996	0.396999	TRUE	0	345144	60389	0.148913	TRUE	0	56467	FALSE	0	0.139241
NC_ShH-6	26327745	TRUE	1	23289302	TRUE	1	9057514	0.388913	TRUE	1	8449414	0.362802	1277599	TRUE	1	2084991	0.0895257	TRUE	1	119591	757221	876812	0.686297	TRUE	1	1195477	82122	0.0642784	TRUE	1	487988	TRUE	1	0.381957
NC_ShH-7	36970244	TRUE	1	33993186	TRUE	1	6530878	0.192123	TRUE	1	21736395	0.639434	4232301	TRUE	1	1833452	0.0539359	TRUE	1	266107	3228139	3494246	0.825614	TRUE	1	4097521	134780	0.0318456	TRUE	1	2100840	TRUE	1	0.496382
NC_ShH-8	23633619	TRUE	1	21528820	TRUE	1	5652526	0.262556	TRUE	1	11132101	0.517079	2939789	TRUE	1	427030	0.0198353	TRUE	1	616063	158339	774402	0.263421	TRUE	1	2369467	570322	0.194001	TRUE	1	61251	FALSE	0	0.0208352
NC_ShH-9	38462042	TRUE	1	35497531	TRUE	1	2337720	0.0658558	TRUE	1	15920908	0.448507	4065549	TRUE	1	9872221	0.27811	TRUE	1	368462	2437613	2806075	0.690208	TRUE	1	3801384	264165	0.0649765	TRUE	1	1588979	TRUE	1	0.39084
STAD-2121836	50475121	TRUE	1	49194061	TRUE	1	19556	0.000397528	TRUE	1	28562663	0.580612	2395040	TRUE	1	14422000	0.293165	TRUE	1	262651	1189552	1452203	0.606338	TRUE	1	2200863	194177	0.0810746	TRUE	1	625638	TRUE	1	0.261222
STAD-2163710	60240985	TRUE	1	46710095	TRUE	1	914744	0.0195834	TRUE	1	40651716	0.870298	7424040	TRUE	1	452926	0.00969653	TRUE	1	481785	5779358	6261143	0.843361	TRUE	1	7268625	155415	0.020934	TRUE	1	3525499	TRUE	1	0.474876
STAD-2244628	86056200	TRUE	1	59624514	TRUE	1	2867567	0.0480938	TRUE	1	46072730	0.772715	6956324	TRUE	1	860264	0.014428	TRUE	1	392416	5479513	5871929	0.844114	TRUE	1	6807072	149252	0.0214556	TRUE	1	3335672	TRUE	1	0.479516
STAD-2374161	34828490	TRUE	1	29178018	TRUE	1	103387	0.00354332	TRUE	1	21940620	0.751957	581852	TRUE	1	5621739	0.19267	TRUE	1	57103	319160	376263	0.646664	TRUE	1	552329	29523	0.0507397	TRUE	1	149468	TRUE	1	0.256883
STAD-2380893	36564696	TRUE	1	33904859	TRUE	1	446311	0.0131636	TRUE	1	30346723	0.895055	6067880	TRUE	1	1023443	0.0301857	TRUE	1	404690	4649327	5054017	0.832913	TRUE	1	5958425	109455	0.0180384	TRUE	1	2673201	TRUE	1	0.440549
STAD-2381588	50147279	TRUE	1	46493799	TRUE	1	10359	0.000222804	TRUE	1	42758134	0.919652	7265281	TRUE	1	962274	0.0206968	TRUE	1	487292	5615371	6102663	0.839976	TRUE	1	7142651	122630	0.0168789	TRUE	1	3410465	TRUE	1	0.46942
STAD-2382676	36569881	TRUE	1	35055463	TRUE	1	802423	0.0228901	TRUE	1	26358689	0.751914	5036276	TRUE	1	1567182	0.0447058	TRUE	1	365559	3672284	4037843	0.801752	TRUE	1	4853823	182453	0.0362278	TRUE	1	2224490	TRUE	1	0.441693
STAD-2382823	34580422	TRUE	1	32222597	TRUE	1	51094	0.00158566	TRUE	1	29771458	0.923931	3830332	TRUE	1	618547	0.0191961	TRUE	1	241236	3025094	3266330	0.852754	TRUE	1	3774902	55430	0.0144713	TRUE	1	1832783	TRUE	1	0.478492
STAD-2383295	36688288	TRUE	1	34829306	TRUE	1	1404490	0.0403249	TRUE	1	26010299	0.746793	5594481	TRUE	1	2690165	0.0772385	TRUE	1	403493	3880196	4283689	0.765699	TRUE	1	5442529	151952	0.0271611	TRUE	1	2218048	TRUE	1	0.396471
STAD-2383652	37443850	TRUE	1	35479760	TRUE	1	1599778	0.0450899	TRUE	1	28096788	0.79191	5051058	TRUE	1	2544321	0.0717119	TRUE	1	351127	3656831	4007958	0.793489	TRUE	1	4930278	120780	0.0239118	TRUE	1	2075250	TRUE	1	0.410855
STAD-2383723	26590385	TRUE	1	24351717	TRUE	1	74866	0.00307436	TRUE	1	23115662	0.949242	3321474	TRUE	1	208032	0.00854281	TRUE	1	206906	2515328	2722234	0.819586	TRUE	1	3280674	40800	0.0122837	TRUE	1	1561584	TRUE	1	0.470148
STAD-2384103	36452393	TRUE	1	34498489	TRUE	1	1572773	0.0455896	TRUE	1	27809851	0.806118	5528371	TRUE	1	1388419	0.0402458	TRUE	1	374636	4136810	4511446	0.816053	TRUE	1	5388353	140018	0.0253272	TRUE	1	2465055	TRUE	1	0.445892
STAD-2384513	38404734	TRUE	1	35731261	TRUE	1	2221614	0.0621756	TRUE	1	26995898	0.755526	6428079	TRUE	1	2209992	0.0618504	TRUE	1	471702	4621138	5092840	0.79228	TRUE	1	6232695	195384	0.0303954	TRUE	1	2871631	TRUE	1	0.446732
STAD-2386451	2202616	FALSE	0	2015835	FALSE	0	78596	0.0389893	TRUE	0	1568810	0.778243	35205	FALSE	0	27034	0.0134108	TRUE	0	2811	21820	24631	0.699645	TRUE	0	32568	2637	0.0749041	TRUE	0	9499	FALSE	0	0.26982
STAD-2386653	41883361	TRUE	1	38793822	TRUE	1	406201	0.0104708	TRUE	1	35493728	0.914932	4805297	TRUE	1	590323	0.0152169	TRUE	1	343491	3591095	3934586	0.818802	TRUE	1	4691818	113479	0.0236154	TRUE	1	2164373	TRUE	1	0.450414
STAD-2387639	29641034	TRUE	1	26843076	TRUE	1	338189	0.0125987	TRUE	1	24509366	0.913061	5375677	TRUE	1	611577	0.0227834	TRUE	1	326040	4210184	4536224	0.843842	TRUE	1	5301050	74627	0.0138823	TRUE	1	2557297	TRUE	1	0.475716
STAD-2387809	38644489	TRUE	1	36716475	TRUE	1	795622	0.0216693	TRUE	1	32678552	0.890024	7623684	TRUE	1	645477	0.01758	TRUE	1	533583	5753576	6287159	0.824688	TRUE	1	7427296	196388	0.0257602	TRUE	1	3696166	TRUE	1	0.484827
STAD-2390003	46182946	TRUE	1	43957067	TRUE	1	521716	0.0118688	TRUE	1	39820379	0.905893	8266513	TRUE	1	1096683	0.024949	TRUE	1	577761	6420692	6998453	0.846603	TRUE	1	8113571	152942	0.0185014	TRUE	1	4179398	TRUE	1	0.505582
STAD-2391832	40205157	TRUE	1	39429888	TRUE	1	979	2.48289e-05	TRUE	1	35964853	0.912122	6088034	TRUE	1	1130313	0.0286664	TRUE	1	423669	4637138	5060807	0.831271	TRUE	1	5970053	117981	0.0193792	TRUE	1	2828931	TRUE	1	0.464671
STAD-2393829	37249039	TRUE	1	35232845	TRUE	1	628	1.78243e-05	TRUE	1	29337697	0.83268	3969894	TRUE	1	1171358	0.0332462	TRUE	1	283875	2919638	3203513	0.806952	TRUE	1	3844686	125208	0.0315394	TRUE	1	1500700	TRUE	1	0.37802
STAD-2393878	38377795	TRUE	1	36270949	TRUE	1	1972141	0.0543725	TRUE	1	30128553	0.830652	6028141	TRUE	1	1157686	0.0319177	TRUE	1	397984	4671604	5069588	0.840987	TRUE	1	5922279	105862	0.0175613	TRUE	1	2663427	TRUE	1	0.441832
STAD-2394727	37629453	TRUE	1	35787181	TRUE	1	1660118	0.0463886	TRUE	1	29992752	0.838086	5332291	TRUE	1	469426	0.0131172	TRUE	1	350591	4097773	4448364	0.834231	TRUE	1	5222727	109564	0.0205473	TRUE	1	2481961	TRUE	1	0.465459
STAD-2396557	33314626	TRUE	1	31444652	TRUE	1	1084380	0.0344854	TRUE	1	26854355	0.85402	5063504	TRUE	1	1231650	0.0391688	TRUE	1	297597	3809155	4106752	0.811049	TRUE	1	4981908	81596	0.0161145	TRUE	1	2131762	TRUE	1	0.421005
STAD-2402396	35435466	TRUE	1	34627865	TRUE	1	877	2.53264e-05	TRUE	1	31734684	0.916449	6099310	TRUE	1	680117	0.0196407	TRUE	1	394687	4691818	5086505	0.833948	TRUE	1	6012617	86693	0.0142136	TRUE	1	2720860	TRUE	1	0.446093
STAD-2406523	39266155	TRUE	1	38505210	TRUE	1	1516	3.93713e-05	TRUE	1	35072309	0.910846	4840816	TRUE	1	1610712	0.041831	TRUE	1	315282	3622370	3937652	0.813427	TRUE	1	4731494	109322	0.0225834	TRUE	1	1934965	TRUE	1	0.399719
STAD-2406754	46779778	TRUE	1	45098859	TRUE	1	22091	0.000489835	TRUE	1	27413850	0.607861	4186014	TRUE	1	12843819	0.284793	TRUE	1	557009	1754745	2311754	0.552257	TRUE	1	3749827	436187	0.104201	TRUE	1	928046	TRUE	1	0.221702
STAD-2411921	41511192	TRUE	1	39924001	TRUE	1	1658	4.15289e-05	TRUE	1	36951903	0.925556	6306969	TRUE	1	1250257	0.0313159	TRUE	1	386959	5032081	5419040	0.859215	TRUE	1	6213586	93383	0.0148063	TRUE	1	2852037	TRUE	1	0.452204
STAD-2412284	33312122	TRUE	1	31566455	TRUE	1	11472	0.000363424	TRUE	1	23009958	0.728937	3233067	TRUE	1	5702342	0.180646	TRUE	1	229467	2319910	2549377	0.788532	TRUE	1	3140279	92788	0.0286997	TRUE	1	1128123	TRUE	1	0.348933
STAD-2412938	46671562	TRUE	1	44876530	TRUE	1	1594	3.55197e-05	TRUE	1	35042207	0.780858	5229608	TRUE	1	6195704	0.138061	TRUE	1	355822	3939044	4294866	0.82126	TRUE	1	5101419	128189	0.0245122	TRUE	1	2174531	TRUE	1	0.415811
STAD-2412941	34766760	TRUE	1	33994694	TRUE	1	9512	0.000279808	TRUE	1	30912192	0.909324	4462516	TRUE	1	1197313	0.0352206	TRUE	1	282926	3393949	3676875	0.823947	TRUE	1	4388309	74207	0.016629	TRUE	1	1842486	TRUE	1	0.412881
STAD-2414108	24836988	TRUE	1	23014814	TRUE	1	7498	0.00032579	TRUE	1	16384189	0.711898	2389950	TRUE	1	5494702	0.238746	TRUE	1	153281	1800491	1953772	0.817495	TRUE	1	2321639	68311	0.0285826	TRUE	1	906757	TRUE	1	0.379404
STAD-2414120	39418421	TRUE	1	38512671	TRUE	1	12193	0.000316597	TRUE	1	31556296	0.819374	3965834	TRUE	1	4256910	0.110533	TRUE	1	280598	2720827	3001425	0.756821	TRUE	1	3822996	142838	0.0360171	TRUE	1	1434591	TRUE	1	0.361738
STAD-2414426	33958068	TRUE	1	32633006	TRUE	1	5430	0.000166396	TRUE	1	24846392	0.761388	3472529	TRUE	1	4935117	0.151231	TRUE	1	241848	2496424	2738272	0.788553	TRUE	1	3363153	109376	0.0314975	TRUE	1	1425970	TRUE	1	0.410643
STAD-2414774	42530103	TRUE	1	40215970	TRUE	1	14648	0.000364233	TRUE	1	25870703	0.643294	4989653	TRUE	1	8057782	0.200363	TRUE	1	950336	669182	1619518	0.324575	TRUE	1	4058070	931583	0.186703	TRUE	1	357107	TRUE	1	0.0715695
STAD-2415291	42675613	TRUE	1	41490589	TRUE	1	4900	0.000118099	TRUE	1	38509219	0.928143	5978410	TRUE	1	723907	0.0174475	TRUE	1	397966	4692627	5090593	0.851496	TRUE	1	5883398	95012	0.0158925	TRUE	1	2793336	TRUE	1	0.467237
STAD-2416091	37731788	TRUE	1	36539855	TRUE	1	2671	7.30983e-05	TRUE	1	33440932	0.915191	4146853	TRUE	1	875272	0.0239539	TRUE	1	288918	3156257	3445175	0.830793	TRUE	1	4082595	64258	0.0154956	TRUE	1	1799313	TRUE	1	0.433898
STAD-2416272	32729617	TRUE	1	31247402	TRUE	1	11479	0.000367359	TRUE	1	20027049	0.640919	3411965	TRUE	1	8357474	0.267461	TRUE	1	264547	2285113	2549660	0.74727	TRUE	1	3282530	129435	0.0379356	TRUE	1	1140365	TRUE	1	0.334225
