# Supplementary material for: Cancer type classification using plasma cell-free RNAs derived from human and microbes
Source: eLife. 2022 Jul 11;11:e75181. doi: 10.7554/eLife.75181 (PMC9273212; doi:10.7554/eLife.75181)
Supplement: Supplementary file 3. [file elife-75181-supp3.xlsx]

## Sheet: Filtering of Genera
genera	common lab contamination	negative control samples	skin microbiome	virus with non human eukaryotic host	passed filter
10|Cellvibrio	0	0	1	0	0
1004301|Flavihumibacter	0	0	0	0	1
1007|Saprospira	0	0	0	0	1
1013|Weeksella	0	0	1	0	0
1016|Capnocytophaga	0	1	1	0	0
1021|Beggiatoa	0	0	1	0	0
102106|Collinsella	0	0	1	0	0
1033|Afipia	1	0	0	0	0
10358|Cytomegalovirus	0	0	0	0	1
10375|Lymphocryptovirus	0	0	0	0	1
10405|Orthohepadnavirus	0	0	0	0	1
1041|Erythrobacter	0	1	1	0	0
104204|Streptomonospora	0	0	0	0	1
104264|Cellulophaga	0	0	0	0	1
104267|Tenacibaculum	0	0	0	0	1
105|Runella	0	0	0	0	1
10509|Mastadenovirus	0	0	0	0	1
1051|Ectothiorhodospira	0	0	0	0	1
1055323|Aeribacillus	0	0	0	0	1
1055688|Sandaracinus	0	0	0	0	1
1055692|Chitinolyticbacter	0	0	0	0	1
1060|Rhodobacter	0	0	1	0	0
106146|Pelistega	0	0	0	0	1
10639|Caulimovirus	0	0	0	1	0
106589|Cupriavidus	1	1	1	0	0
106591|Ensifer	0	0	0	0	1
106633|Thioalkalivibrio	0	0	1	0	0
1068|Rhodomicrobium	0	0	1	0	0
1069494|Trueperella	0	0	0	0	1
107|Spirosoma	0	0	1	0	0
1073|Rhodopseudomonas	0	0	1	0	0
1073531|Mycolicibacter	0	0	0	0	1
1073986|Halobellus	0	0	0	0	1
1073987|Halorientalis	0	0	0	0	1
1075397|Halolamina	0	0	0	0	1
1077265|Chthonomonas	0	0	0	0	1
1078904|Candidatus Nitrosotalea	0	0	0	0	1
1081|Rhodospirillum	0	0	1	0	0
1082702|Lonsdalea	0	1	0	0	0
1082930|Pelagibacterium	0	0	1	0	0
1084558|Oceanicoccus	0	0	0	0	1
1085622|Propioniciclava	0	0	0	0	1
1091|Chlorobium	0	0	0	0	1
109262|Halothiobacillus	0	0	0	0	1
1097466|Defluviimonas	0	0	0	0	1
1099|Pelodictyon	0	0	0	0	1
11007|Totivirus	0	0	0	1	0
1100891|Paenalcaligenes	0	0	0	0	1
1101|Prosthecochloris	0	0	0	0	1
11019|Alphavirus	0	0	0	0	1
1107|Chloroflexus	0	0	0	0	1
110932|Leifsonia	0	0	1	0	0
1111|Porphyrobacter	0	1	0	0	0
111500|Muricauda	0	0	0	0	1
112040|Zobellia	0	0	0	0	1
1125|Microcystis	0	0	0	0	1
1129|Synechococcus	0	0	1	0	0
1129704|Kyrpidia	0	0	0	0	1
112987|Neochlamydia	0	0	0	0	1
113|Gemmata	0	0	1	0	0
1134403|Melioribacter	0	0	0	0	1
1137960|Allokutzneria	0	0	0	0	1
114185|Candidatus Carsonella	0	0	0	0	1
114627|Alkaliphilus	0	0	0	0	1
1156568|Methylovirgula	0	0	0	0	1
1158|Oscillatoria	0	0	0	0	1
116071|Micropruina	0	0	0	0	1
1160973|Auritidibacter	0	0	0	0	1
1161127|Murdochiella	0	0	0	0	1
1163|Anabaena	0	0	0	0	1
11646|Lentivirus	0	0	0	0	1
1164882|Lachnoanaerobaculum	0	1	0	0	0
117156|Actinopolymorpha	0	0	0	0	1
1172191|Catenovulum	0	0	0	0	1
1177|Nostoc	0	0	1	0	0
1184396|Mesotoga	0	0	0	0	1
1184606|Austwickia	0	0	0	0	1
1186|Calothrix	0	0	0	0	1
1190|Fischerella	0	0	0	0	1
119044|Filomicrobium	0	0	0	0	1
119164|Polerovirus	0	0	0	1	0
1193324|Alkalitalea	0	0	0	0	1
1193503|Gilliamella	0	1	0	0	0
1193515|Snodgrassella	0	0	0	0	1
119541|Rhodobaca	0	0	0	0	1
1195526|Gryllotalpicola	0	0	0	0	1
119977|Acidithiobacillus	0	0	1	0	0
1203|Scytonema	0	0	0	0	1
1204360|Siansivirga	0	0	0	0	1
1205|Trichodesmium	0	0	0	0	1
120652|Methylocella	0	0	1	0	0
120831|Dyadobacter	1	0	1	0	0
1209327|Flavivirga	0	0	0	0	1
1209988|Halopenitus	0	0	0	0	1
12137|Sobemovirus	0	0	0	1	0
12141|Tombusvirus	0	0	0	0	1
12148|Tymovirus	0	0	0	1	0
12160|Closterovirus	0	0	0	1	0
12163|Carlavirus	0	0	0	1	0
12174|Capillovirus	0	0	0	1	0
1217416|Halioglobus	0	0	0	0	1
12176|Potexvirus	0	0	0	1	0
1218|Prochlorococcus	0	0	0	0	1
121871|Haloterrigena	0	0	0	0	1
12195|Potyvirus	0	0	0	1	0
1221880|Psychrobacillus	0	0	0	0	1
122277|Pectobacterium	0	1	1	0	0
12234|Tobamovirus	0	0	0	1	0
1227|Nitrosococcus	0	0	0	0	1
123|Pirellula	0	0	0	0	1
12304|Cucumovirus	0	0	0	1	0
1230698|Marisediminicola	0	0	0	0	1
1231242|Ferrovibrio	0	0	0	0	1
12316|Ilarvirus	0	0	0	1	0
1234|Nitrospira	0	0	1	0	0
1237|Piscirickettsia	0	0	0	0	1
1243|Leuconostoc	0	1	1	0	0
125216|Roseomonas	1	1	0	0	0
125287|Ornithinimicrobium	0	0	0	0	1
1253|Pediococcus	0	0	1	0	0
1263|Ruminococcus	0	0	1	0	0
1269|Micrococcus	1	1	1	0	0
127|Isosphaera	0	0	0	0	1
1273155|Thiohalobacter	0	0	0	0	1
1274351|Kroppenstedtia	0	0	0	0	1
1278221|Auraticoccus	0	1	0	0	0
1279|Staphylococcus	1	1	1	0	0
1283313|Alloprevotella	0	0	0	0	1
1287916|Euzebyella	0	0	0	0	1
1291539|Candidatus Methanomethylophilus	0	0	0	0	1
12916|Acidovorax	1	1	1	0	0
129337|Geobacillus	0	1	1	0	0
1295327|Croceicoccus	0	0	0	0	1
129577|Oceanimonas	0	0	1	0	0
12960|Azoarcus	1	1	1	0	0
1298|Deinococcus	1	1	1	0	0
1299429|Yuavirus	0	0	0	0	1
1301|Streptococcus	1	1	1	0	0
1301080|Candidatus Nasuia	0	0	0	0	1
1302410|Candidatus Annandia	0	0	0	0	1
131079|Limnobacter	1	0	1	0	0
13134|Magnetospirillum	0	0	1	0	0
1329200|Fictibacillus	0	1	0	0	0
133|Methylocystis	0	0	1	0	0
1330545|Lelliottia	0	1	0	0	0
1330546|Pluralibacter	0	1	0	0	0
1330547|Kosakonia	0	1	0	0	0
1331051|Candidatus Saccharimonas	0	0	0	0	1
1331730|Chryseoglobus	0	0	0	0	1
1331737|Haloactinobacterium	0	0	0	0	1
133193|Alkalilimnicola	0	0	1	0	0
1335483|Shimwellia	0	0	1	0	0
1335631|Frischella	0	0	0	0	1
1335745|Spiribacter	0	0	0	0	1
133925|Olsenella	0	0	1	0	0
1344552|Noviherbaspirillum	0	0	0	0	1
134813|Natronorubrum	0	0	0	0	1
1348508|Roseimicrobium	0	0	0	0	1
1350|Enterococcus	0	1	1	0	0
135575|Idiomarina	0	0	0	0	1
1357|Lactococcus	0	0	1	0	0
13687|Sphingomonas	1	1	1	0	0
1372|Planococcus	0	1	0	0	0
1375|Aerococcus	0	1	1	0	0
1378|Gemella	0	0	1	0	0
1379908|Rufibacter	0	1	0	0	0
138|Borrelia	0	0	0	0	1
1381133|Candidatus Profftella	0	1	0	0	0
1386|Bacillus	1	1	1	0	0
1392389|Intestinimonas	0	0	0	0	1
1395974|Tardiphaga	0	0	0	0	1
140052|Betaretrovirus	0	0	0	0	1
140458|Thermacetogenium	0	0	0	0	1
140568|Allexivirus	0	0	0	1	0
1408194|Endomicrobium	0	0	0	0	1
141450|Oleiphilus	0	0	0	0	1
141948|Thermomonas	0	0	0	0	1
142577|Prauserella	0	0	0	0	1
143222|Salegentibacter	0	0	0	0	1
1433402|Glycocaulis	0	0	0	0	1
1433993|Chryseolinea	0	0	0	0	1
1433997|Diaminobutyricimonas	0	0	0	0	1
1434010|Jatrophihabitans	0	0	0	0	1
1434011|Komagataeibacter	0	0	1	0	0
1434018|Lysinimonas	0	0	0	0	1
1434019|Mameliella	0	0	0	0	1
1434032|Pontimonas	0	0	0	0	1
1434046|Sphingorhabdus	0	0	0	0	1
1434050|Zhongshania	0	0	0	0	1
143920|Alphanodavirus	0	0	0	1	0
144051|Cripavirus	0	0	0	1	0
1443590|Ferriphaselus	0	0	0	0	1
1443919|Tabrizicola	0	0	0	0	1
146|Spirochaeta	0	0	0	0	1
146784|Bacteriovorax	0	0	0	0	1
146918|Salinibacter	0	0	0	0	1
146937|Azospira	1	0	1	0	0
1470540|Jeotgalibaca	0	0	0	0	1
147067|Thermobispora	0	0	1	0	0
1471399|Draconibacterium	0	0	0	0	1
1484898|Methyloceanibacter	0	0	0	0	1
1485|Clostridium	0	1	1	0	0
1485594|Methyloligella	0	0	0	0	1
149698|Massilia	1	1	0	0	0
150022|Finegoldia	0	0	1	0	0
1501226|Romboutsia	0	1	0	0	0
150203|Blastomonas	0	1	0	0	0
150247|Anoxybacillus	0	1	1	0	0
1505663|Erysipelatoclostridium	0	0	0	0	1
1505664|Gottschalkia	0	0	0	0	1
1506553|Lachnoclostridium	0	0	1	0	0
1508657|Ruminiclostridium	0	0	0	0	1
1509243|Candidatus Nucleicultrix	0	0	0	0	1
1511635|Aquisphaera	0	0	0	0	1
1511648|Defluviitoga	0	0	0	0	1
1511810|Deltapartitivirus	0	0	0	1	0
1518147|Wenyingzhuangia	0	0	0	0	1
1518149|Thalassotalea	0	0	0	0	1
152053|Starkeya	0	0	1	0	0
1521255|Candidatus Paracaedibacter	0	0	0	0	1
152161|Stappia	0	0	0	0	1
1522056|Flaviflexus	0	1	0	0	0
1522431|Thermosulfurimonas	0	0	0	0	1
152267|Pigmentiphaga	0	0	0	0	1
1524214|Vulgatibacter	0	0	0	0	1
1524217|Labilithrix	0	0	0	0	1
1524249|Pseudohongiella	0	1	0	0	0
1525371|Neorhizobium	0	0	0	0	1
153135|Gammaretrovirus	0	0	0	0	1
153265|Aequorivita	0	0	0	0	1
153497|Kozakia	0	0	0	0	1
1537406|Bacterioplanes	0	0	0	0	1
154116|Georgenia	0	0	0	0	1
1541445|Candidatus Phaeomarinobacter	0	0	0	0	1
1542963|Halapricum	0	0	0	0	1
1543704|Niveispirillum	0	0	0	0	1
1543705|Nitrospirillum	0	0	0	0	1
1546255|Mumia	0	1	0	0	0
1551504|Candidatus Babela	0	0	0	0	1
155493|Gallibacterium	0	0	1	0	0
155977|Acaryochloris	0	0	0	0	1
1562|Desulfotomaculum	0	0	0	0	1
1565532|Rouxiella	0	0	0	0	1
1569|Sporosarcina	0	0	0	0	1
156973|Dysgonomonas	0	0	0	0	1
157|Treponema	0	0	1	0	0
157226|Jeotgalibacillus	0	0	0	0	1
1572860|Hartmannibacter	0	0	0	0	1
1573|Clavibacter	0	0	1	0	0
1573534|Faecalitalea	0	0	0	0	1
157591|Sterolibacterium	0	0	0	0	1
1578|Lactobacillus	0	1	1	0	0
157920|Cellulosimicrobium	0	0	0	0	1
1579315|Halocynthiibacter	0	0	0	0	1
1579506|Roseimaritima	0	0	0	0	1
1582879|Ezakiella	0	0	0	0	1
158481|Hahella	0	0	0	0	1
158483|Cedecea	0	1	0	0	0
158846|Megamonas	0	1	0	0	0
158876|Yokenella	0	0	0	0	1
159191|Nodularia	0	0	0	0	1
159345|Roseibacterium	0	0	0	0	1
1594166|Oricola	0	0	0	0	1
16|Methylophilus	1	0	0	0	0
1602345|Parasaccharibacter	0	0	0	0	1
160674|Raoultella	0	1	0	0	0
1607807|Candidatus Methanoplasma	0	0	0	0	1
160795|Ureibacillus	0	0	0	0	1
1608298|Thiolapillus	0	0	0	0	1
1611681|Mucinivorans	0	0	0	0	1
1612157|Pararhodospirillum	0	0	1	0	0
161492|Anaeromyxobacter	0	0	1	0	0
1616789|Salinispira	0	0	0	0	1
162027|Haliangium	0	0	1	0	0
1621534|Paraglaciecola	0	0	0	0	1
162171|Magnetococcus	0	0	0	0	1
162289|Peptoniphilus	0	0	0	0	1
162291|Planomicrobium	0	1	0	0	0
1623278|Bronvirus	0	0	0	0	1
1623297|Stanholtvirus	0	0	0	0	1
1623298|Phietavirus	0	0	0	0	1
1623304|Moineauvirus	0	0	0	0	1
162491|Oerskovia	0	0	0	0	1
1632780|Phreatobacter	0	0	0	0	1
1637|Listeria	0	0	1	0	0
1637257|Mageeibacillus	0	0	1	0	0
1644057|Salinigranum	0	0	0	0	1
1645|Renibacterium	0	0	1	0	0
1647|Erysipelothrix	0	0	0	0	1
1648508|Ciceribacter	0	0	0	0	1
1649|Kurthia	0	0	0	0	1
1649279|Epibacterium	0	0	0	0	1
1649453|Gimesia	0	0	0	0	1
1649454|Glaciihabitans	0	0	0	0	1
1649459|Hungatella	0	0	0	0	1
1649463|Lentilitoribacter	0	0	0	0	1
1649468|Melaminivora	0	0	0	0	1
1649470|Minicystis	0	0	0	0	1
1649474|Nibribacter	0	0	0	0	1
1649478|Pelolinea	0	0	0	0	1
1649480|Planctopirus	0	0	0	0	1
1649486|Rhizorhabdus	0	0	0	0	1
1649490|Rubinisphaera	0	0	0	0	1
1649510|Variibacter	0	0	0	0	1
1652133|Halobacteriovorax	0	0	0	0	1
165301|Lentzea	0	1	0	0	0
1653174|Actinotignum	0	0	0	0	1
1654|Actinomyces	0	1	0	0	0
1654741|Bombella	0	0	0	0	1
1654931|Crenobacter	0	0	0	0	1
1656823|Halanaeroarchaeum	0	0	0	0	1
165695|Sphingobium	1	1	1	0	0
165696|Novosphingobium	1	1	1	0	0
165697|Sphingopyxis	1	0	1	0	0
165779|Anaerococcus	0	0	1	0	0
1663|Arthrobacter	1	1	1	0	0
1663717|Herbinix	0	0	0	0	1
1676125|Thermogutta	0	0	0	0	1
1676142|Wenzhouxiangella	0	0	0	0	1
167639|Ilyobacter	0	0	0	0	1
1676651|Limnochorda	0	0	0	0	1
1677050|Novibacillus	0	0	0	0	1
1678|Bifidobacterium	0	1	1	0	0
1679002|Candidatus Methylopumilus	0	1	0	0	0
1682492|Candidatus Tachikawaea	0	0	0	0	1
168470|Laribacter	0	0	1	0	0
168694|Salinispora	0	0	1	0	0
168808|Sneathia	0	0	0	0	1
168934|Thalassospira	0	0	0	0	1
169055|Nordella	0	0	0	0	1
169133|Citricoccus	0	0	0	0	1
1692042|Sulfurifustis	0	0	0	0	1
1696|Brevibacterium	1	1	1	0	0
1705353|Aurantimicrobium	0	0	0	0	1
1706036|Gemmatirosa	0	0	0	0	1
1707|Cellulomonas	0	0	1	0	0
171|Leptospira	0	0	0	0	1
171003|Caloranaerobacter	0	0	0	0	1
171163|Halosimplex	0	0	0	0	1
1714270|Gammasphaerolipovirus	0	0	0	0	1
171436|Tistrella	0	0	1	0	0
1716|Corynebacterium	1	1	1	0	0
1720323|Lessievirus	0	0	0	0	1
1729679|Faecalibaculum	0	0	0	0	1
1730|Eubacterium	0	0	1	0	0
173479|Gemmatimonas	0	0	1	0	0
1734920|Pseudorhodoplanes	0	0	0	0	1
1738655|Woeseia	0	0	0	0	1
1740|Thermodesulfobacterium	0	0	0	0	1
1742989|Glutamicibacter	0	1	0	0	0
1742992|Paenarthrobacter	0	0	0	0	1
1742993|Pseudarthrobacter	0	1	0	0	0
1743|Propionibacterium	1	0	1	0	0
1744881|Sulfuricaulis	0	0	0	0	1
174951|Ramlibacter	0	1	1	0	0
1751872|Lacimicrobium	0	0	0	0	1
175304|Lentibacillus	0	0	0	0	1
1754|Thermoanaerobacter	0	0	0	0	1
1755825|Egicoccus	0	0	0	0	1
1755829|Ichthyobacterium	0	0	0	0	1
1759331|Cnuibacter	0	0	0	0	1
1763|Mycobacterium	1	0	1	0	0
1763521|Paludisphaera	0	0	0	0	1
1765964|Acidihalobacter	0	1	0	0	0
1769012|Arachidicoccus	0	0	0	0	1
1769729|Hathewaya	0	0	0	0	1
1778601|Apibacter	0	0	0	0	1
1778653|Sulfuriferula	0	0	0	0	1
1779136|Bradymonas	0	0	0	0	1
1780190|Izhakiella	0	0	0	0	1
178440|Opitutus	0	0	1	0	0
178469|Arenibacter	0	0	0	0	1
1784836|Fermentimonas	0	0	0	0	1
178898|Carboxydocella	0	0	0	0	1
18|Pelobacter	0	0	0	0	1
180252|Mardivirus	0	0	0	1	0
1802983|Candidatus Fokinia	0	0	0	0	1
1804663|Haematospirillum	0	0	0	0	1
180541|Salinisphaera	0	0	0	0	1
181083|Chlorovirus	0	0	0	1	0
1810868|Mycoavidus	0	1	0	0	0
1813|Amycolatopsis	0	0	1	0	0
1817|Nocardia	0	1	1	0	0
1822464|Paraburkholderia	0	1	0	0	0
1825023|Candidatus Nitrosotenuis	0	0	0	0	1
182639|Kribbella	0	0	1	0	0
1826864|Candidatus Nitrosocosmicus	0	0	0	0	1
1827|Rhodococcus	1	1	1	0	0
182709|Oceanobacillus	0	0	1	0	0
1827195|Caballeronia	0	1	0	0	0
1827478|Youhaiella	0	0	0	0	1
1835|Saccharopolyspora	0	0	1	0	0
1839|Nocardioides	0	1	1	0	0
1843210|Anaerocolumna	0	0	0	0	1
1847|Pseudonocardia	0	0	1	0	0
1847725|Lawsonella	0	0	0	0	1
1849|Actinopolyspora	0	0	0	0	1
1849530|Oblitimonas	0	1	0	0	0
1849822|Paraclostridium	0	0	0	0	1
1849828|Paeniclostridium	0	0	0	0	1
1851|Saccharomonospora	0	0	1	0	0
1854|Frankia	0	0	1	0	0
1855413|Brevirhabdus	0	1	0	0	0
1855416|Qipengyuania	0	0	0	0	1
1860|Geodermatophilus	1	0	1	0	0
1861863|Sinimarinibacterium	0	0	0	0	1
186188|Xylanimonas	0	0	1	0	0
1862|Dermatophilus	0	0	0	0	1
1865|Actinoplanes	0	0	1	0	0
186650|Microvirga	0	1	0	0	0
1866885|Mycolicibacterium	0	1	0	0	0
186767|Narnavirus	0	0	0	1	0
186831|Acetoanaerobium	0	0	0	0	1
1868332|Neomicrococcus	0	1	0	0	0
1869285|Allofrancisella	0	0	0	0	1
187|Aquaspirillum	0	0	0	0	1
1870884|Clostridioides	0	1	0	0	0
187217|Tunavirus	0	0	0	0	1
1873|Micromonospora	0	0	1	0	0
187492|Thalassolituus	0	0	0	0	1
188143|Enterovibrio	0	0	0	0	1
1882917|Pajaroellobacter	0	0	0	0	1
1883|Streptomyces	0	1	1	0	0
188905|Jannaschia	0	0	1	0	0
189384|Candidatus Tremblaya	0	0	0	0	1
1897649|Pistricoccus	0	0	0	0	1
1902583|Candidatus Desulfofervidus	0	0	0	0	1
190323|Plantibacter	0	0	0	0	1
1903434|Atlantibacter	0	1	0	0	0
1905344|Ruthenibacterium	0	0	0	0	1
1906657|Candidatus Doolittlea	0	0	0	0	1
1906659|Candidatus Hoaglandella	0	1	0	0	0
1906660|Candidatus Mikella	0	0	0	0	1
1906661|Candidatus Gullanella	0	1	0	0	0
1906945|Parageobacillus	0	0	0	0	1
191|Azospirillum	0	0	1	0	0
191028|Leisingera	0	0	0	0	1
1911549|Raineyella	0	0	0	0	1
1911573|Haloprofundus	0	0	0	0	1
1911577|Oryzomicrobium	0	0	0	0	1
1911599|Alphacarmovirus	0	0	0	1	0
1911601|Gammacarmovirus	0	0	0	1	0
1912215|Acidipropionibacterium	0	0	0	0	1
1912216|Cutibacterium	0	1	0	0	0
1912217|Pseudopropionibacterium	0	0	0	0	1
191303|Turicibacter	0	0	0	0	1
191494|Conexibacter	0	0	1	0	0
1915401|Roseitalea	0	0	0	0	1
191769|Marinilactibacillus	0	0	0	0	1
1918540|Muribaculum	0	0	0	0	1
1920864|Rtpvirus	0	0	0	0	1
1921582|Orrella	0	0	0	0	1
1921784|Kiritimatiella	0	0	0	0	1
1926259|Pseudactinotalea	0	0	0	0	1
1927833|Candidatus Fukatsuia	0	1	0	0	0
1930845|Ndongobacter	0	0	0	0	1
1934947|Immundisolibacter	0	0	0	0	1
1935188|Libanicoccus	0	0	0	0	1
1936111|Fuerstia	0	0	0	0	1
1937972|Bernardetia	0	0	0	0	1
194|Campylobacter	0	1	1	0	0
1940138|Candidatus Walczuchella	0	0	0	0	1
1941236|Gemykibivirus	0	0	0	0	1
194195|Alysiella	0	0	0	0	1
195950|Tannerella	0	0	1	0	0
1960084|Rodentibacter	0	0	0	0	1
196081|Scardovia	0	0	0	0	1
196082|Parascardovia	0	0	0	0	1
1961799|Lacunisphaera	0	0	0	0	1
1964366|Nissabacter	0	0	0	0	1
1970191|Salinivirga	0	0	0	0	1
1980513|Candidatus Nitrosoglobus	0	0	0	0	1
1980514|Halodesulfurarchaeum	0	0	0	0	1
1981050|Phoenicibacter	0	0	0	0	1
198251|Candidatus Pelagibacter	0	0	0	0	1
1988|Actinomadura	0	0	0	0	1
1988031|Candidatus Promineofilum	0	0	0	0	1
20|Phenylobacterium	0	0	1	0	0
2000|Streptosporangium	0	0	1	0	0
2003394|Alphaendornavirus	0	0	0	1	0
2004797|Luteitalea	0	1	0	0	0
2005363|Auricoccus	0	0	0	0	1
2005380|Mariniblastus	0	0	0	0	1
2005386|Arabia	0	0	0	0	1
200903|Paraliobacillus	0	0	0	0	1
201096|Alicycliphilus	0	0	1	0	0
2013|Nocardiopsis	0	1	1	0	0
2019|Thermomonospora	0	0	1	0	0
2019482|Brevefilum	0	0	0	0	1
2023|Thermoactinomyces	0	0	0	0	1
2024975|Silvanigrella	0	0	0	0	1
2025617|Ketobacter	0	0	0	0	1
202746|Sulfurimonas	0	0	0	0	1
2028344|Ereboglobus	0	0	0	0	1
2029|Kibdelosporangium	0	0	0	0	1
202907|Collimonas	0	1	1	0	0
203133|Propionimicrobium	0	0	0	0	1
203193|Halobiforma	0	0	0	0	1
2034|Curtobacterium	1	1	0	0	0
2035712|Guyparkeria	0	0	0	0	1
2035811|Pseudodesulfovibrio	0	0	0	0	1
2036021|Agarilytica	0	0	0	0	1
2038|Tropheryma	0	0	0	0	1
203804|Candidatus Blochmannia	0	0	0	0	1
2039240|Anaerotignum	0	0	0	0	1
2039639|Candidatus Nanopelagicus	0	1	0	0	0
2040|Aeromicrobium	1	0	0	0	0
204037|Dickeya	0	1	1	0	0
2042066|Paraphotobacterium	0	0	0	0	1
204286|Cobetia	0	0	0	0	1
2044|Pimelobacter	0	1	0	0	0
204447|Skermanella	0	0	0	0	1
204456|Gemmobacter	0	0	0	0	1
204476|Labrys	0	0	0	0	1
2045213|Candidatus Fonsibacter	0	0	0	0	1
204619|Candidatus Nardonella	0	0	0	0	1
2049301|Changchengzhania	0	0	0	0	1
2050|Mobiluncus	0	0	1	0	0
2051044|Tuwongella	0	0	0	0	1
2053|Gordonia	0	0	1	0	0
2055880|Pseudescherichia	0	0	0	0	1
2058174|Antarcticibacterium	0	0	0	0	1
2060|Tsukamurella	1	0	1	0	0
2060722|Labilibaculum	0	0	0	0	1
2063|Kitasatospora	0	0	1	0	0
2071|Saccharothrix	0	0	0	0	1
207244|Anaerostipes	0	1	0	0	0
2077|Sporolactobacillus	0	0	0	0	1
2078575|Psychromicrobium	0	0	0	0	1
2078948|Epidermidibacterium	0	0	0	0	1
208215|Parvularcula	0	0	0	0	1
209|Helicobacter	0	1	0	0	0
2093|Mycoplasma	0	0	0	0	1
2093783|Methylomusa	0	0	0	0	1
2094023|Glaesserella	0	0	0	0	1
2100764|Mixta	0	1	0	0	0
2115980|Candidatus Phycorickettsia	0	0	0	0	1
2126281|Mycolicibacillus	0	0	0	0	1
212743|Rhizobacter	0	1	0	0	0
2129|Ureaplasma	0	0	0	0	1
2132|Spiroplasma	0	0	0	0	1
213485|Micavibrio	0	0	1	0	0
2147|Acholeplasma	0	0	0	0	1
214906|Histophilus	0	0	1	0	0
2160|Methanobacterium	0	0	0	0	1
216851|Faecalibacterium	0	1	0	0	0
2172|Methanobrevibacter	0	0	0	0	1
2172100|Limnobaculum	0	1	0	0	0
2173039|Arcticibacterium	0	0	0	0	1
219181|Ottowia	0	0	0	0	1
22|Shewanella	0	0	1	0	0
2202|Methanospirillum	0	0	0	0	1
2207|Methanosarcina	0	0	0	0	1
221065|Kordia	0	0	0	0	1
2211641|Yoonia	0	0	0	0	1
222|Achromobacter	0	1	1	0	0
2220|Methanolobus	0	0	0	0	1
2222|Methanothrix	0	0	0	0	1
2233801|Ahniella	0	0	0	0	1
2237|Haloarcula	0	0	0	0	1
2239|Halobacterium	0	0	0	0	1
2251|Haloferax	0	0	0	0	1
225143|Oceanisphaera	0	0	0	0	1
2256|Natronobacterium	0	0	0	0	1
225842|Formosa	0	0	0	0	1
226|Alteromonas	0	0	1	0	0
227388|Thermodesulfobium	0	0	0	0	1
2276|Pyrobaculum	0	0	0	0	1
227873|Pannonibacter	0	0	0	0	1
227979|Jeotgalicoccus	0	1	0	0	0
2282523|Methylorubrum	0	0	0	0	1
2282740|Desulfallas	0	0	0	0	1
228398|Streptacidiphilus	0	0	0	0	1
2304692|Hungateiclostridium	0	0	0	0	1
2304693|Pseudoclostridium	0	0	0	0	1
230494|Reinekea	0	0	0	0	1
230666|Chitinibacter	0	0	0	0	1
231454|Dyella	0	0	0	0	1
2316020|Mediterraneibacter	0	0	0	0	1
231683|Saccharospirillum	0	0	0	0	1
2321111|Aliiarcobacter	0	0	0	0	1
2321113|Pseudoarcobacter	0	0	0	0	1
2321115|Halarcobacter	0	0	0	0	1
232244|Belliella	0	0	0	0	1
232523|Hylemonella	0	0	0	0	1
2330|Halanaerobium	0	0	0	0	1
233189|Anaerolinea	0	0	0	0	1
233191|Caldilinea	0	0	0	0	1
2335|Thermotoga	0	0	0	0	1
234|Brucella	0	0	0	0	1
235572|Candidatus Portiera	0	0	0	0	1
235888|Salinibacterium	0	0	0	0	1
236752|Fastidiosipila	0	0	0	0	1
237|Flavobacterium	1	1	1	0	0
2370|Xylella	0	0	0	0	1
2375|Sporomusa	0	0	0	0	1
238749|Diaphorobacter	0	0	0	0	1
238783|Pseudorhodobacter	0	0	0	0	1
239759|Alistipes	0	0	1	0	0
239934|Akkermansia	0	0	1	0	0
240411|Chitinimonas	0	0	0	0	1
241192|Thermodesulfatator	0	0	0	0	1
2420|Thermosipho	0	0	0	0	1
2422|Fervidobacterium	0	0	0	0	1
2425|Teredinibacter	0	0	0	0	1
242605|Luteibacter	0	0	0	0	1
2433|Roseobacter	0	0	1	0	0
244698|Gillisia	0	0	0	0	1
245876|Nitratireductor	0	0	0	0	1
246861|Grimontia	0	0	0	0	1
246875|Algoriphagus	0	0	0	0	1
2478349|Indioceanicola	0	0	0	0	1
2483368|Sedimentisphaera	0	0	0	0	1
2489367|Candidatus Cyclonatronum	0	0	0	0	1
2490452|Serpentinomonas	0	1	0	0	0
249199|Mandarivirus	0	0	0	1	0
249529|Caldanaerobacter	0	0	0	0	1
252301|Oceanicola	0	0	1	0	0
252306|Robiginitalea	0	0	0	0	1
252356|Maribacter	0	0	0	0	1
2529408|Schaalia	0	0	0	0	1
253238|Ethanoligenens	0	0	0	0	1
254245|Aquicella	0	0	0	0	1
254250|Isoptericola	0	0	1	0	0
2560087|Alphachrysovirus	0	0	0	1	0
256319|Chlorobaculum	0	0	0	0	1
2571159|Mycetohabitans	0	0	0	0	1
257820|Kerstersia	0	0	0	0	1
258255|Pseudovibrio	0	0	0	0	1
2600304|Baekduia	0	0	0	0	1
2603324|Acidibrevibacterium	0	0	0	0	1
2608728|Acidisarcina	0	0	0	0	1
261825|Agarivorans	0	0	0	0	1
261827|Algibacter	0	0	0	0	1
261963|Kangiella	0	0	0	0	1
262|Francisella	0	0	0	0	1
263377|Salipiger	0	0	0	0	1
264688|Trichormus	0	0	0	0	1
265|Paracoccus	1	1	1	0	0
265488|Rhodopirellula	0	0	0	0	1
265570|Sulfurovum	0	0	0	0	1
265976|Serinicoccus	0	1	0	0	0
2661818|Saliniradius	0	0	0	0	1
267408|Arsenicicoccus	0	0	0	0	1
2675229|Peribacillus	0	0	0	0	1
2675230|Cytobacillus	0	0	0	0	1
2675231|Mesobacillus	0	0	0	0	1
2675232|Neobacillus	0	1	0	0	0
2675233|Metabacillus	0	0	0	0	1
2675234|Alkalihalobacillus	0	1	0	0	0
2676060|Allopseudarcicella	0	0	0	0	1
2678343|Halalkaliarchaeum	0	0	0	0	1
267849|Nitrincola	0	0	0	0	1
2678886|Pulveribacter	0	1	0	0	0
2679910|Intestinibaculum	0	0	0	0	1
2680004|Protaetiibacter	0	0	0	0	1
2680021|Ephemeroptericola	0	1	0	0	0
2685905|Salicibibacter	0	0	0	0	1
2685927|Tardibacter	0	1	0	0	0
2689587|Suicoccus	0	0	0	0	1
2690159|Anaerohalosphaera	0	0	0	0	1
2690160|Limihaloglobus	0	0	0	0	1
2697|Heliobacterium	0	0	0	0	1
2698688|Paraflavitalea	0	0	0	0	1
270|Thermus	0	1	1	0	0
2700084|Urechidicola	0	0	0	0	1
2701|Gardnerella	0	1	1	0	0
2707020|Aerosticca	0	0	0	0	1
2717|Cardiobacterium	0	0	0	0	1
2717089|Massilistercora	0	0	0	0	1
273135|Candidatus Cardinium	0	0	0	0	1
2732587|Candidatus Vesicomyosocius	0	0	0	0	1
2732977|Citexvirus	0	0	0	0	1
2733115|Naesvirus	0	0	0	0	1
2735|Verrucomicrobium	0	0	0	0	1
2737|Vagococcus	0	0	0	0	1
2740557|Pauljensenia	0	0	0	0	1
2742|Marinobacter	0	0	1	0	0
2745|Halomonas	0	1	1	0	0
274591|Hoeflea	1	0	0	0	0
2747|Carnobacterium	0	0	1	0	0
2755|Brochothrix	1	0	0	0	0
2765402|Natrarchaeobaculum	0	0	0	0	1
2767842|Lactiplantibacillus	0	1	0	0	0
278993|Thermincola	0	0	0	0	1
279|Xanthobacter	0	0	1	0	0
280472|Aquiflexum	0	0	0	0	1
28050|Lachnospira	0	0	0	0	1
28065|Rhodoferax	0	0	1	0	0
28067|Rubrivivax	0	0	1	0	0
28100|Phyllobacterium	1	0	0	0	0
28105|Sinorhizobium	0	0	1	0	0
281472|Jiangella	0	0	0	0	1
281915|Curvibacter	1	1	0	0	0
28196|Arcobacter	0	0	0	0	1
28209|Chelatococcus	0	0	0	0	1
282132|Candidatus Protochlamydia	0	0	0	0	1
28228|Colwellia	0	0	0	0	1
28231|Geobacter	0	0	1	0	0
28236|Petrotoga	0	0	0	0	1
28250|Ornithobacterium	0	0	0	0	1
28253|Marinomonas	0	1	0	0	0
28263|Arcanobacterium	0	0	1	0	0
283|Comamonas	1	1	1	0	0
283168|Odoribacter	0	0	1	0	0
283735|Leeuwenhoekiella	0	0	0	0	1
283810|Stackebrandtia	0	0	1	0	0
28453|Sphingobacterium	0	1	0	0	0
285107|Thioclava	0	0	0	0	1
286|Pseudomonas	1	1	1	0	0
286104|Winogradskyella	0	0	0	0	1
286130|Sulfuricurvum	0	0	0	0	1
286801|Segniliparus	0	0	1	0	0
288793|Salinimonas	0	0	0	0	1
28884|Hydrogenovibrio	0	0	0	0	1
28895|Thermoanaerobacterium	0	0	0	0	1
289201|Pontibacillus	0	0	0	0	1
289244|Xylanimicrobium	0	0	0	0	1
290174|Aquimarina	0	0	0	0	1
290180|Roseivirga	0	1	0	0	0
290425|Advenella	0	0	1	0	0
291183|Lacinutrix	0	0	0	0	1
292486|Avibacterium	0	0	0	0	1
292635|Laceyella	0	0	0	0	1
292691|Gramella	0	0	0	0	1
29287|Natronococcus	0	0	0	0	1
293088|Martelella	0	0	0	0	1
29330|Alicyclobacillus	0	0	1	0	0
29331|Amphibacillus	0	0	0	0	1
293431|Haloquadratum	0	0	0	0	1
29393|Dolosigranulum	0	0	0	0	1
29404|Microlunatus	1	0	1	0	0
29407|Rhodoplanes	0	0	0	0	1
29465|Veillonella	0	0	1	0	0
294702|Proteiniphilum	0	0	0	0	1
29487|Photorhabdus	0	1	0	0	0
29521|Brachyspira	0	1	0	0	0
29526|Syntrophobacter	0	0	0	0	1
29548|Rhodothermus	0	0	1	0	0
295595|Candidatus Hepatoplasma	0	0	0	0	1
29574|Taylorella	0	0	0	0	1
29580|Janthinobacterium	1	1	1	0	0
299261|Tateyamaria	0	0	0	0	1
299566|Adhaeribacter	0	0	0	0	1
302485|Phaeobacter	0	0	1	0	0
303379|Herminiimonas	0	0	1	0	0
305899|Endozoicomonas	0	0	0	0	1
305976|Pusillimonas	0	0	1	0	0
307628|Petrimonas	0	0	0	0	1
308865|Elizabethkingia	0	1	0	0	0
309512|Dinoroseobacter	0	0	1	0	0
311181|Denitratisoma	0	0	0	0	1
314343|Sideroxydans	0	0	1	0	0
316612|Methylibium	0	0	1	0	0
316625|Saccharophagus	0	0	0	0	1
318147|Paucibacter	0	0	0	0	1
319458|Leadbetterella	0	0	1	0	0
31988|Aminobacter	0	0	0	0	1
32|Myxococcus	0	0	1	0	0
32008|Burkholderia	1	1	1	0	0
32012|Thiomonas	0	1	1	0	0
32014|Iodobacter	0	0	0	0	1
320496|Neoasaia	0	0	0	0	1
32067|Leptotrichia	0	0	1	0	0
32199|Buchnera	0	0	1	0	0
32207|Rothia	0	1	1	0	0
32257|Kingella	1	0	0	0	0
323413|Dokdonella	0	0	0	0	1
323449|Pontibacter	0	1	0	0	0
323620|Shinella	0	0	0	0	1
326319|Dokdonia	0	0	0	0	1
327159|Candidatus Accumulibacter	0	0	0	0	1
329857|Cohnella	0	0	0	0	1
33001|Desulfurella	0	0	0	0	1
33024|Phascolarctobacterium	0	0	0	0	1
33055|Candidatus Kinetoplastibacterium	0	0	0	0	1
33057|Thauera	0	0	1	0	0
33073|Zymobacter	0	0	0	0	1
332102|Fluviicola	0	0	0	0	1
332246|Halalkalicoccus	0	0	0	0	1
332248|Truepera	0	0	1	0	0
332951|Halovivax	0	0	0	0	1
334107|Conchiformibius	0	0	0	0	1
334202|Mupapillomavirus	0	0	0	0	1
335405|Sphingosinicella	0	0	0	0	1
335927|Thalassobius	0	0	0	0	1
336276|Olleya	0	0	0	0	1
336809|Candidatus Sulcia	0	0	0	0	1
337004|Microcella	0	1	0	0	0
338|Xanthomonas	1	0	1	0	0
338321|Turneriella	0	0	0	0	1
33877|Agromyces	0	0	0	0	1
33882|Microbacterium	1	1	1	0	0
33886|Rathayibacter	0	0	0	0	1
33951|Acetobacterium	0	0	0	0	1
33969|Melissococcus	0	0	1	0	0
33973|Acidobacterium	0	0	1	0	0
33981|Kineococcus	0	0	1	0	0
33986|Exiguobacterium	0	1	1	0	0
34008|Rhodovulum	0	0	0	0	1
34019|Liberibacter	0	0	0	0	1
34037|Rahnella	0	1	1	0	0
34067|Cycloclasticus	0	0	0	0	1
34072|Variovorax	1	1	1	0	0
34084|Riemerella	0	0	1	0	0
34093|Simkania	0	0	0	0	1
34098|Blattabacterium	0	0	0	0	1
34102|Sphaerotilus	0	0	0	0	1
34104|Streptobacillus	0	0	1	0	0
346096|Paludibacter	0	0	0	0	1
347533|Zobellella	0	0	0	0	1
349742|Sedimenticola	0	0	0	0	1
351195|Salimicrobium	0	0	0	0	1
352|Azotobacter	0	0	1	0	0
352450|Simplicispira	0	1	0	0	0
353799|Halostagnicola	0	0	0	0	1
354203|Yangia	0	0	0	0	1
354354|Niastella	1	0	1	0	0
357|Agrobacterium	0	0	1	0	0
35798|Nitrosospira	0	1	0	0	0
358023|Lutibacter	0	0	0	0	1
35823|Arthrospira	0	0	1	0	0
359336|Castellaniella	0	0	0	0	1
359407|Methylotenera	0	0	0	0	1
360528|Pelagibaca	0	0	0	0	1
361177|Altererythrobacter	0	1	0	0	0
363408|Nonlabens	0	0	0	0	1
364316|Verminephrobacter	0	0	1	0	0
364409|Granulibacter	0	0	1	0	0
365348|Pelosinus	0	0	0	0	1
366614|Haematobacter	0	0	0	0	1
367298|Phycicoccus	0	0	0	0	1
36739|Dermabacter	0	0	0	0	1
367771|Marinovum	0	0	0	0	1
36853|Desulfitobacterium	0	0	0	0	1
370735|Zhihengliuella	0	0	0	0	1
374|Bradyrhizobium	1	1	1	0	0
375288|Parabacteroides	0	0	1	0	0
375928|Natranaerobius	0	0	0	0	1
376170|Haloplanus	0	0	0	0	1
376469|Olivibacter	1	0	0	0	0
376488|Halotalea	0	0	0	0	1
377315|Mariprofundus	0	0	0	0	1
378210|Methyloversatilis	1	0	0	0	0
379|Rhizobium	1	0	1	0	0
379068|Galbibacter	0	0	0	0	1
379070|Gilvibacter	0	0	0	0	1
37914|Dietzia	1	1	0	0	0
379899|Niabella	0	0	0	0	1
380738|Candidatus Kuenenia	0	0	0	0	1
38501|Blastococcus	0	0	1	0	0
387095|Maribius	0	0	0	0	1
387342|Halopiger	0	0	0	0	1
388463|Edaphobacter	0	0	0	0	1
390805|Geosporobacter	0	0	0	0	1
390846|Echinicola	0	0	0	0	1
392332|Geoalkalibacter	0	0	0	0	1
392733|Terriglobus	0	0	1	0	0
393005|Tamlana	0	0	0	0	1
39643|Sorangium	0	0	1	0	0
39744|Rubulavirus	0	0	0	1	0
39773|Methylomicrobium	0	0	0	0	1
397864|Barnesiella	0	0	0	0	1
398041|Flavisolibacter	0	0	0	0	1
39948|Dialister	0	0	0	0	1
40|Stigmatella	0	0	1	0	0
400634|Lysinibacillus	0	1	1	0	0
400947|Deefgea	0	0	0	0	1
40136|Oligotropha	0	0	0	0	1
401469|Undibacterium	1	0	0	0	0
401618|Candidatus Riesia	0	0	0	0	1
40222|Methylophaga	0	0	0	0	1
40272|Roseolovirus	0	0	0	0	1
40323|Stenotrophomonas	1	0	1	0	0
404|Methylobacillus	0	0	1	0	0
404432|Salinicola	0	1	0	0	0
40544|Sutterella	0	0	0	0	1
40566|Actinosynnema	0	0	1	0	0
407|Methylobacterium	1	1	1	0	0
407217|Aquitalea	0	0	0	0	1
40751|Thioploca	0	0	0	0	1
41201|Ewingella	0	0	0	0	1
41273|Tissierella	0	0	0	0	1
41275|Brevundimonas	1	1	1	0	0
413|Methylococcus	0	0	1	0	0
413435|Solimonas	0	0	0	0	1
413496|Cronobacter	0	1	1	0	0
414371|Aureimonas	0	0	0	0	1
414878|Catenulispora	0	0	1	0	0
416|Methylomonas	0	0	0	0	1
416916|Aggregatibacter	0	1	1	0	0
41707|Lawsonia	0	0	0	0	1
417127|Zunongwangia	0	0	0	0	1
42|Cystobacter	0	1	0	0	0
42054|Chromohalobacter	0	0	1	0	0
42255|Rubrobacter	0	1	1	0	0
423349|Mucilaginibacter	0	1	0	0	0
425|Methylosinus	0	0	0	0	1
427753|Humibacter	0	0	0	0	1
428711|Jonquetella	0	0	0	0	1
432330|Tumebacillus	0	0	0	0	1
43356|Kutzneria	0	0	0	0	1
434|Acetobacter	0	0	0	0	1
436357|Thalassococcus	0	0	0	0	1
43668|Brachybacterium	0	1	1	0	0
43673|Jonesia	0	0	1	0	0
43773|Syntrophus	0	0	0	0	1
43947|Tolumonas	0	0	1	0	0
44|Melittangium	0	0	0	0	1
44000|Caldicellulosiruptor	0	0	0	0	1
44011|Ferrimonas	0	0	1	0	0
44013|Polynucleobacter	0	1	0	0	0
441|Gluconobacter	0	0	1	0	0
44249|Paenibacillus	1	0	1	0	0
44258|Caloramator	0	0	0	0	1
44259|Filifactor	0	0	1	0	0
44260|Moorella	0	0	0	0	1
444051|Mesoflavibacter	0	0	0	0	1
444459|Flagellimonas	0	0	0	0	1
44471|Microcoleus	0	0	0	0	1
44474|Pleurocapsa	0	0	0	0	1
445|Legionella	0	1	0	0	0
447020|Adlercreutzia	0	0	0	0	1
447237|Frondihabitans	0	0	0	0	1
447467|Simiduia	0	0	0	0	1
447792|Phytobacter	0	1	0	0	0
449972|Chelativorans	0	0	1	0	0
453161|Candidatus Nitrotoga	0	0	0	0	1
455076|Rhodocytophaga	0	0	0	0	1
456492|Saccharibacillus	0	0	0	0	1
45667|Halobacillus	0	0	0	0	1
45669|Salinicoccus	0	0	0	0	1
458032|Chloracidobacterium	0	0	0	0	1
458839|Actinotalea	0	0	0	0	1
459532|Terribacillus	0	0	0	0	1
459786|Oscillibacter	0	0	1	0	0
45989|Methanoculleus	0	0	0	0	1
461|Fluoribacter	0	0	0	0	1
46123|Abiotrophia	1	1	0	0	0
46205|Pseudobutyrivibrio	0	0	0	0	1
46238|Entomoplasma	0	0	0	0	1
46239|Mesoplasma	0	0	0	0	1
46254|Oenococcus	0	0	0	0	1
46255|Weissella	0	0	1	0	0
46352|Agrococcus	0	0	0	0	1
465|Tatlockia	0	0	0	0	1
466152|Singulisphaera	0	0	0	0	1
469|Acinetobacter	1	1	1	0	0
46913|Devosia	1	1	0	0	0
469322|Steroidobacter	0	0	0	0	1
47|Archangium	0	0	0	0	1
47251|Leptolyngbya	0	0	0	0	1
472568|Devriesea	0	0	0	0	1
472825|Candidatus Purcelliella	0	0	0	0	1
47420|Hydrogenophaga	0	1	0	0	0
475|Moraxella	0	1	1	0	0
47670|Lautropia	0	0	0	0	1
478070|Labrenzia	0	0	1	0	0
48073|Microbulbifer	0	0	0	0	1
48075|Marinobacterium	0	0	0	0	1
482|Neisseria	0	1	1	0	0
48736|Ralstonia	1	1	1	0	0
490567|Arenimonas	0	0	0	0	1
49277|Psychroserpens	0	0	0	0	1
497|Psychrobacter	1	1	1	0	0
497726|Nitrososphaera	0	0	0	0	1
499228|Tepidanaerobacter	0	0	0	0	1
50|Chondromyces	0	0	0	0	1
501783|Cloacibacterium	0	1	0	0	0
504090|Kushneria	0	0	0	0	1
507|Alcaligenes	0	1	0	0	0
508459|Cloacibacillus	0	0	0	0	1
511434|Candidatus Azobacteroides	0	0	0	0	1
511678|Aliivibrio	0	1	0	0	0
51366|Salinivibrio	0	0	0	0	1
51514|Dehalobacterium	0	0	0	0	1
51668|Tetragenococcus	0	0	1	0	0
517|Bordetella	0	1	1	0	0
518733|Microterricola	0	0	0	0	1
518753|Luteolibacter	0	0	0	0	1
522|Acidiphilium	0	0	1	0	0
527198|Mariniflexile	0	0	0	0	1
528|Ochrobactrum	1	0	1	0	0
52959|Polaribacter	0	0	0	0	1
52972|Polaromonas	1	0	1	0	0
529881|Candidatus Aquiluna	0	0	0	0	1
529883|Rhodoluna	0	0	0	0	1
532|Beijerinckia	1	0	0	0	0
53246|Pseudoalteromonas	0	1	1	0	0
53335|Pantoea	0	1	1	0	0
53357|Intrasporangium	0	0	1	0	0
53387|Friedmanniella	0	1	0	0	0
53392|Thiodictyon	0	0	0	0	1
53457|Janibacter	1	1	0	0	0
53460|Nakamurella	0	0	1	0	0
535|Chromobacterium	0	1	1	0	0
538|Eikenella	0	0	0	0	1
53945|Octadecabacter	0	0	0	0	1
54066|Xylophilus	0	0	0	0	1
541|Zymomonas	0	0	1	0	0
542837|Zindervirus	0	0	0	0	1
54298|Chroococcidiopsis	0	0	1	0	0
54304|Planktothrix	0	0	0	0	1
543311|Parvimonas	0	0	0	0	1
544|Citrobacter	0	1	1	0	0
547|Enterobacter	1	1	1	0	0
55079|Aneurinibacillus	0	0	0	0	1
55080|Brevibacillus	1	0	0	0	0
551|Erwinia	0	1	1	0	0
551759|Aromatoleum	0	0	1	0	0
556257|Pseudolabrys	0	0	0	0	1
558016|Alphabaculovirus	0	0	0	1	0
558017|Betabaculovirus	0	0	0	1	0
55968|Leucobacter	0	0	0	0	1
561|Escherichia	1	1	1	0	0
56106|Cylindrospermum	0	0	0	0	1
56358|Sandaracinobacter	0	0	0	0	1
56688|Halorubrum	0	0	1	0	0
568|Hafnia	0	0	0	0	1
568987|Candidatus Hamiltonella	0	1	0	0	0
570|Klebsiella	0	1	1	0	0
572511|Blautia	0	0	1	0	0
573657|Candidatus Hodgkinia	0	0	0	0	1
574697|Butyricimonas	0	0	0	0	1
57479|Microvirgula	0	0	0	0	1
57493|Kocuria	1	1	1	0	0
57494|Nesterenkonia	0	1	0	0	0
57495|Dermacoccus	0	0	0	0	1
57499|Kytococcus	0	0	1	0	0
57665|Sulfurospirillum	0	0	0	0	1
577309|Paraprevotella	0	0	0	0	1
57739|Vogesella	0	0	0	0	1
579|Kluyvera	0	1	0	0	0
58050|Moritella	0	0	0	0	1
581|Morganella	0	1	0	0	0
583|Proteus	0	1	1	0	0
586|Providencia	0	1	0	0	0
58842|Sagittula	0	0	1	0	0
59|Vitreoscilla	0	1	0	0	0
590|Salmonella	0	1	1	0	0
59195|Rickettsiella	0	0	1	0	0
59282|Blastochloris	0	0	0	0	1
596707|Sinomonas	0	0	0	0	1
59732|Chryseobacterium	1	0	0	0	0
59734|Empedobacter	0	0	0	0	1
59735|Bergeyella	0	0	0	0	1
59739|Flammeovirga	0	0	0	0	1
59753|Alcanivorax	0	1	1	0	0
599651|Bermanella	0	0	0	0	1
6|Azorhizobium	0	0	1	0	0
60136|Sulfitobacter	0	0	0	0	1
60846|Halogeometricum	0	0	0	0	1
60919|Sanguibacter	0	0	1	0	0
613|Serratia	0	1	1	0	0
61434|Dehalococcoides	0	0	0	0	1
620|Shigella	0	1	0	0	0
622681|Candidatus Planktophila	0	1	0	0	0
623276|Maritalea	0	0	0	0	1
626|Xenorhabdus	0	1	0	0	0
626119|Ruania	0	0	0	0	1
629|Yersinia	0	1	1	0	0
630749|Spongiibacter	0	0	0	0	1
635|Edwardsiella	0	1	1	0	0
637|Arsenophonus	0	1	0	0	0
63742|Natrialba	0	0	0	0	1
64159|Desulfurobacterium	0	0	0	0	1
642|Aeromonas	0	1	1	0	0
644355|Inhella	0	0	0	0	1
644652|Gordonibacter	0	0	0	0	1
648800|Solibacillus	0	0	1	0	0
648802|Rummeliibacillus	0	0	0	0	1
64895|Borreliella	0	0	0	0	1
649460|Filimonas	0	0	0	0	1
649461|Lacibacter	0	0	0	0	1
65047|Mitsuaria	0	0	0	0	1
651456|Kosmotoga	0	0	0	0	1
651660|Paenisporosarcina	0	0	0	0	1
65496|Actinoalloteichus	0	0	0	0	1
655184|Candidatus Thioglobus	0	0	0	0	1
655352|Cohaesibacter	0	0	0	0	1
65551|Meiothermus	0	0	1	0	0
657|Photobacterium	0	1	0	0	0
662|Vibrio	0	1	1	0	0
665568|Paraoerskovia	0	0	0	0	1
665874|Limnohabitans	0	1	0	0	0
670486|Dehalogenimonas	0	0	0	0	1
670516|Mycobacteroides	0	1	0	0	0
673534|Plantactinospora	0	0	0	0	1
67572|Psychromonas	0	0	0	0	1
67575|Rheinheimera	0	0	0	0	1
68|Lysobacter	0	0	0	0	1
682522|Ilumatobacter	0	0	0	0	1
68287|Mesorhizobium	1	1	1	0	0
68288|Cyclobacterium	0	0	0	0	1
687331|Alphatorquevirus	0	0	0	0	1
687332|Betatorquevirus	0	0	0	0	1
687333|Gammatorquevirus	0	0	0	0	1
692606|Cyprinivirus	0	0	0	1	0
69474|Orientia	0	0	0	0	1
69578|Cryobacterium	0	0	0	0	1
697025|Hoyosella	0	0	0	0	1
697331|Basfia	0	0	1	0	0
69965|Macrococcus	0	0	1	0	0
702|Plesiomonas	0	1	0	0	0
70411|Frateuria	0	0	1	0	0
70774|Hydrogenophilus	0	0	0	0	1
71|Simonsiella	0	0	0	0	1
713|Actinobacillus	0	1	1	0	0
71655|Brenneria	0	1	0	0	0
71666|Waddlia	0	0	0	0	1
72173|Citromicrobium	0	0	0	0	1
724|Haemophilus	0	1	1	0	0
72763|Tessaracoccus	0	0	0	0	1
73029|Dechloromonas	0	0	1	0	0
73778|Methylocaldum	0	0	0	0	1
73918|Thermaerobacter	0	0	1	0	0
74030|Roseovarius	0	1	1	0	0
74032|Antarctobacter	0	0	0	0	1
741759|Tomitella	0	0	0	0	1
74317|Maricaulis	0	0	1	0	0
743714|Orbus	0	0	0	0	1
74385|Gracilibacillus	0	0	0	0	1
744724|Halarchaeum	0	0	0	0	1
745|Pasteurella	0	1	1	0	0
745364|Luteipulveratus	0	0	0	0	1
745410|Gallaecimonas	0	0	0	0	1
748770|Dolichospermum	0	0	0	0	1
75|Caulobacter	1	1	1	0	0
752201|Sphaerospermopsis	0	0	0	0	1
75309|Rhodanobacter	0	0	0	0	1
754249|Luteimicrobium	0	0	0	0	1
75654|Duganella	1	0	0	0	0
75687|Neptunomonas	0	0	0	0	1
75905|Thermocrinis	0	0	0	0	1
75984|Mannheimia	0	0	1	0	0
762296|Methylovulum	0	0	0	0	1
76632|Thermobacillus	0	0	0	0	1
76634|Mycetocola	0	0	0	0	1
768|Anaplasma	0	0	0	0	1
76831|Myroides	0	0	0	0	1
76833|Actinobaculum	0	0	0	0	1
76890|Asticcacaulis	1	1	1	0	0
773|Bartonella	0	0	0	0	1
776|Coxiella	0	0	0	0	1
79206|Desulfosporosinus	0	0	0	0	1
79328|Chitinophaga	0	0	0	0	1
79603|Denitrobacterium	0	0	0	0	1
80865|Delftia	1	1	1	0	0
81|Hyphomicrobium	0	0	1	0	0
810|Chlamydia	0	0	0	0	1
816|Bacteroides	0	1	1	0	0
81682|Methylovorus	0	0	1	0	0
82976|Buttiauxella	0	0	0	0	1
82980|Leminorella	0	0	0	0	1
82982|Obesumbacterium	0	0	0	0	1
82984|Pragia	0	1	0	0	0
82986|Tatumella	0	1	0	0	0
830|Butyrivibrio	0	0	0	0	1
832|Fibrobacter	0	0	0	0	1
83461|Corallococcus	0	0	1	0	0
83551|Parachlamydia	0	0	0	0	1
836|Porphyromonas	0	0	1	0	0
83612|Psychroflexus	0	0	0	0	1
83614|Luteimonas	0	0	0	0	1
83618|Pseudoxanthomonas	1	0	1	0	0
83654|Leclercia	0	1	0	0	0
83677|Thermobifida	0	0	1	0	0
83681|Nonomuraea	0	0	0	0	1
83770|Succinivibrio	0	0	0	0	1
838|Prevotella	0	1	1	0	0
841|Roseburia	0	1	1	0	0
84108|Slackia	0	0	1	0	0
84111|Eggerthella	0	0	1	0	0
84162|Cryptobacterium	0	0	1	0	0
843|Wolinella	0	0	0	0	1
84406|Virgibacillus	0	0	0	0	1
84565|Sodalis	0	1	1	0	0
84567|Pedobacter	1	1	1	0	0
84593|Verrucosispora	0	0	1	0	0
846|Oxalobacter	1	0	1	0	0
84756|Beutenbergia	1	0	1	0	0
848|Fusobacterium	0	0	1	0	0
85|Hyphomonas	0	0	1	0	0
85072|Allochromatium	0	0	1	0	0
85076|Marichromatium	0	0	0	0	1
85108|Halorhodospira	0	0	1	0	0
85413|Bosea	1	1	0	0	0
86331|Mogibacterium	0	0	0	0	1
864|Pectinatus	0	0	0	0	1
86795|Marmoricola	0	0	0	0	1
869|Dichelobacter	0	0	0	0	1
869806|Marivirga	0	0	0	0	1
872|Desulfovibrio	0	0	1	0	0
875170|Celeribacter	0	0	0	0	1
88|Leptothrix	1	0	1	0	0
88138|Modestobacter	0	1	1	0	0
881616|Herbiconiux	0	0	0	0	1
885864|Jeongeupia	0	0	0	0	1
88723|Natrinema	0	0	0	0	1
890|Desulfuromonas	0	0	0	0	1
893|Desulfobulbus	0	0	0	0	1
89404|Glaciecola	0	0	0	0	1
89583|Gluconacetobacter	0	0	1	0	0
896|Desulfococcus	0	0	0	0	1
898|Desulfomicrobium	0	0	0	0	1
89966|Hymenobacter	0	0	0	0	1
90243|Oligella	0	0	0	0	1
904|Acidaminococcus	0	0	1	0	0
906|Megasphaera	0	0	1	0	0
907364|Phytohabitans	0	0	0	0	1
908623|Euzebya	0	0	0	0	1
909656|Phocaeicola	0	1	0	0	0
911|Nitrobacter	0	0	1	0	0
914|Nitrosomonas	0	1	1	0	0
919|Thiobacillus	0	1	1	0	0
91914|Asaia	0	0	0	0	1
92793|Aquabacterium	1	1	0	0	0
92944|Ketogulonicigenium	0	0	1	0	0
929509|Solitalea	0	0	0	0	1
929812|Gibbsiella	0	1	0	0	0
93|Stella	0	0	0	0	1
93217|Pandoraea	0	1	0	0	0
933|Thiomicrospira	0	0	0	0	1
93681|Roseateles	0	1	0	0	0
93682|Roseivivax	0	0	0	0	1
939|Hydrogenobacter	0	0	0	0	1
940557|Granulicella	0	0	1	0	0
946234|Flavonifractor	0	0	0	0	1
947525|Miniimonas	0	0	0	0	1
947567|Litoreibacter	0	0	0	0	1
953|Wolbachia	0	0	0	0	1
958|Bdellovibrio	0	0	0	0	1
96|Gallionella	0	0	0	0	1
963|Herbaspirillum	1	1	1	0	0
96492|Frigoribacterium	0	0	0	0	1
970|Selenomonas	0	0	1	0	0
97050|Ruegeria	0	0	1	0	0
978|Cytophaga	0	0	1	0	0
984996|Mobilicoccus	0	0	0	0	1
986106|Acidiferrobacter	0	0	0	0	1
99|Ancylobacter	0	0	0	0	1
990721|Christensenella	0	0	0	0	1
99479|Tetrasphaera	0	0	0	0	1
					787
1243 genera are detected by both k-mer and alignment based method, 1 mean a geneus is filtered by a criterion. 787 genera passed all filtered and were used for downstream analysis

## Sheet: Counts-Control Samples
genus	EH_L2	ET_L2	NC_L2
10|"Cellvibrio" Winogradsky 1929	0	0	2
1003030|Cerataulina	0	0	1
1003038|Ctenophora (Grunow) D.M.Williams & Round, 1986	0	0	1
10043|Phodopus	0	0	4
1008944|Rohrkolberia	0	1	0
101|Flectobacillus	0	0	2
101026|environmental samples	0	0	1
1011|Sporocytophaga Stanier 1940	0	0	6
101116|Sporodiniella	0	0	1
101118|Syzygites	0	0	3
101124|Utharomyces	0	0	1
10151|Chinchilla	0	0	6
1016|Sphaerocytophaga	0	0	5
10194|Brachionus	2	0	8
1027911|Anakinetica	0	0	1
1028513|unclassified Cystobacteraceae	0	0	1
1029658|Nuttalliella	0	0	3
1030|Thiothrix Winogradsky 1888 (Approved Lists 1980) emend. Howarth et al. 1999	0	0	1
103853|Auriporia	0	0	3
103943|Protobotrops	0	0	16
1041|Erythrobacter Shiba and Simidu 1982 emend. Subhash et al. 2013	0	0	5
104231|Lentaria	0	0	2
1042316|unclassified Armatimonadetes	0	0	2
104397|Epicoccum	0	0	5
1046309|Archipheretima	0	0	1
1046755|unclassified Araneoidea	0	0	2
1046829|unclassified Sparassidae	0	0	7
1046984|unclassified Parcubacteria	0	0	3
104702|Eurythoe	0	0	4
1047167|Zymoseptoria	0	0	2
104720|Lumbrineris	0	0	1
1051|"Ectothiorhodospira" Truper 1968	1	0	0
105411|Lessonia	2	0	6
105426|unclassified Actinomycetales	0	0	9
105880|Gorgonocephalus	0	0	1
1060|Rhodobacter	0	0	1
106173|Cynoglossus	0	0	1
106589|Wautersia Vaneechoutte et al. 2004	0	2	331
106591|Ensifer	0	0	2
107|Spirosoma	0	0	2
1070711|Macropodia	0	0	1
1073531|Mycolicibacter	0	0	1
1082702|Lonsdalea	15	21	2
108315|Pararhinebothroides	0	0	1
1085622|Propioniciclava Sugawara et al. 2011	0	0	1
1091044|Elstera	0	0	11
109718|Sumireyakko	0	0	1
109740|Pygoplites	0	0	1
109967|Rhizoclosmatium	0	0	1
1100891|Paenalcaligenes	0	0	1
110525|Kretzschmaria	0	0	1
1111|Porphyrobacter	0	0	11
1111431|Rhamphocaulus	0	0	1
1112317|unclassified Mimetidae	0	0	1
1112803|Metacypris	0	0	1
111527|pseudomallei group	1	0	137
111850|Ammopiptanthus S.H.Cheng, 1959	0	0	10
112008|Schineria Toth et al. 2001	0	0	1
112486|Uwebraunia	0	0	1
112497|Ramularia Unger, 1833	0	0	2
1131280|unclassified Zetaproteobacteria	0	0	1
114052|environmental samples	0	1	0
114181|unclassified Chrysophyceae	0	0	4
114248|Tepidimonas	0	0	32
114552|environmental samples	0	0	13
114554|environmental samples	0	0	7
114705|environmental samples	0	0	1
114709|environmental samples	0	0	2
114711|environmental samples	0	0	1
115860|unclassified Rheinheimera	1	0	28
1158982|Calidifontibacter	0	0	1
1164882|Lachnoanaerobaculum	0	0	4
1165752|Chironomus incertae sedis	0	0	3
1169898|Dastarcus	0	0	4
117533|Eulimnadia	0	0	3
117536|Leptestheria	0	0	1
1183400|Agrobacterium tumefaciens complex	0	0	5
118454|Bothropolys	0	0	1
118498|Scolopocryptops	0	0	1
118541|Phrynus	0	0	1
119059|unclassified Oxalobacter group	0	0	1
119067|unclassified Methylophilus group	0	0	2
1193503|Gilliamella	5	3	0
1193515|Snodgrassella	0	1	2
119977|Acidithiobacillus	0	0	1
119994|Lophiola	0	0	2
1202950|Australothele	0	0	3
120301|Oxyrhopus	0	0	19
1206363|Eogystia	1	0	0
121036|unclassified Acidimicrobiia	0	0	6
121508|Liometopum	0	0	2
121514|Technomyrmex	0	0	1
121621|Phyllosticta	0	0	3
1221209|Methylomarinum	1	0	1
122277|Pectobacterium Waldee 1945 (Approved Lists 1980) emend. Hauben et al. 1999	28	14	7
122612|unclassified Sphingomonas group (miscellaneous)	0	0	5
122706|unclassified Deltaproteobacteria	1	2	0
1231360|unclassified Uetakevirus	45	7	0
1232139|Pseudomonas oleovorans/pseudoalcaligenes group	0	0	19
12333|unclassified phages	7	4	1
1237|Piscirickettsia	1	1	0
124139|Penilia	0	0	1
124299|Atherix	0	0	4
1243|Leuconostoc van Tieghem 1878	0	0	4
1243176|Amoeboaphelidium	0	0	3
124333|Vermileo	0	0	1
125216|Teichococcus	0	0	6
1260114|Vermamoeba	0	0	3
1263|Ruminococcus Sijpesteijn 1948	0	0	2
126514|environmental samples	1	1	1
1269|Micrococcus	0	0	44
126908|Withania	2	0	0
127|Isosphaera	0	0	1
1273542|Esquamula Shiratori, Yabuki & Ishida 2012	0	0	3
1278221|Auraticoccus	0	0	4
1279|Staphylococcus	3	2	217
1280310|Psammamonas	0	0	2
128082|environmental samples	0	0	1
129017|Microhyla	0	0	2
12908|unclassified	133	153	217
12916|Acidovorax Willems et al. 1990 emend. Willems et al. 1992	0	0	63
129337|Geobacillus	0	0	3
1295327|Croceicoccus Xu et al. 2009 emend. Huang et al. 2015	0	0	2
12960|Azoarcus	0	0	5
129633|environmental samples	1	0	2
129670|environmental samples	0	0	1
129688|environmental samples	0	0	2
129696|environmental samples	0	0	1
129701|environmental samples	0	0	27
129707|environmental samples	0	0	1
1298|Deinococcus	0	0	15
1301|Streptococcus	0	3	173
130321|environmental samples	0	0	3
131316|Passalora	0	0	1
131324|Pseudocercospora Speg., 1911	0	0	3
131345|Stigmina	0	0	1
132388|Oxyuris	0	0	1
132490|unclassified Burkholderia group	0	0	67
132529|environmental samples	0	0	1
132616|Phytomyza	0	0	1
13287|Thlaspi	0	0	22
1329200|Fictibacillus	0	0	3
1330545|Lelliottia	9	5	1
1330546|Pluralibacter	9	2	0
1330547|Kosakonia	47	52	3
1334486|Euphorbia sect. Tirucalli	1	0	1
1335631|Frischella	0	1	0
13386|Calocedrus	0	0	2
13402|Carya	0	0	2
13414|Chamaecyparis Spach, 1841	0	0	5
134222|environmental samples	2	2	0
134345|environmental samples	12	18	1
13444|Colchicum	0	0	1
1344552|Noviherbaspirillum	0	0	2
1344959|Citrobacter freundii complex	140	148	4
134502|Chaetomella	0	0	1
134716|environmental samples	0	0	1
1350|"Enterococcus" Thiercelin and Jouhaud 1903	0	1	5
135028|environmental samples	0	0	3
135077|environmental samples	0	0	1
135094|environmental samples	0	0	1
135152|environmental samples	0	1	0
1351751|Parastagonospora	0	0	11
135475|Atkinsiella	1	0	0
135640|environmental samples	0	0	4
135644|environmental samples	0	0	1
13578|rushes	0	0	4
136099|Knoellia	0	0	2
13617|Myrmecia	0	0	3
136265|environmental samples	0	0	11
136841|Pseudomonas aeruginosa group	19	14	27
136842|Pseudomonas chlororaphis group	1	0	3
136843|Pseudomonas fluorescens group	5	1	32
136844|Pseudomonas pertucinogena group	1	0	0
136845|Pseudomonas putida group	3	1	7
136846|Pseudomonas stutzeri group	2	1	5
136849|Pseudomonas syringae group	0	0	1
13687|Sphingomonas Yabuuchi et al. 1990 emend. Yabuuchi et al. 2002	0	0	78
1372|Planococcus	0	0	39
1375|Aerococcus Williams et al. 1953	0	0	17
1379908|Rufibacter	0	0	4
1381133|Profftella	0	0	12
1386|Bacillus rRNA group 1	0	0	8
139043|environmental samples	0	0	1
139066|Infundibura	0	0	7
139131|Sistotrema	0	0	2
139271|Pinus subgen. Pinus	0	0	8
1394723|Schrenkiella	0	0	1
139534|Plesiommata	0	0	1
139574|Rhytidodus	0	0	1
139579|Pediopsoides	0	0	1
139586|Nirvana	0	0	1
1400059|Pontibaca	0	0	1
140052|Type D Retrovirus group	0	0	1
1401819|environmental samples	0	0	2
140625|Lachnobacterium Whitford et al. 2001	0	0	1
1407007|Biecheleriopsis	0	0	2
1407607|Fusicatenibacter Takada et al. 2013	0	0	2
1411023|unclassified Peptostreptococcaceae	0	0	2
141396|Cercopagis	0	0	2
141490|Marsdenia	0	0	1
143016|Jakoba	0	0	1
1433999|Domibacillus Seiler et al. 2013 emend. Sun and Sun 2016	0	0	4
1434014|Lentibacter	0	0	1
1434046|Sphingorhabdus	0	0	1
1434050|Zhongshania	1	1	0
143452|Pseudoperonospora	0	0	4
1445877|unclassified diatoms	1	0	0
145435|Glessula	0	0	1
1462605|Glycine subgen. Glycine	0	0	1
146293|Dermatocarpon	0	0	1
146507|aphid secondary symbionts	8	5	0
1484022|Diddensiella	0	1	0
1485|Clostridium	0	0	47
1490863|environmental samples	2	0	0
149698|Naxibacter Xu et al. 2005 emend. Kampfer et al. 2008	0	1	40
1499611|Gonactinia	0	0	1
150022|Finegoldia	0	0	1
1501226|Romboutsia	0	0	5
150203|Erythromonas Yurkov et al. 1997	0	0	22
150247|Anoxybacillus	0	0	13
1502593|Stosicia	0	0	1
150489|uncultured bacteria (human infant) ensemble	1	0	0
150570|uncultured bacteria GR-B1-2 ensemble	1	0	0
150670|environmental samples	0	0	6
1515428|Neocatenulostroma	0	0	2
151555|unclassified Eurotiomycetes	0	0	1
1515599|Pseudoteratosphaeria	0	0	1
151566|environmental samples	0	0	1
151659|environmental samples	490	859	238
151754|Xenophilus	0	0	1
152012|Congeria	0	0	1
1522056|Flaviflexus	0	0	6
1524249|Pseudohongiella Wang et al. 2015 emend. Xu et al. 2016	0	0	9
153036|unclassified Helotiaceae	0	0	1
153135|type C oncoviruses	0	0	2
153250|Cryptocaryon	0	0	1
1535326|Candida	0	1	0
1537667|environmental samples	0	0	1
154020|Ophiactis	0	0	1
154138|Hydrochus	0	0	1
1546255|Mumia	0	0	81
154967|Nuclearia	0	0	2
155493|Gallibacterium	1	0	0
1562575|Bradymyces	0	0	2
1565532|Rouxiella	1	1	0
156896|Microacontias	0	0	1
1573|Clavibacter	0	0	1
1578|Paralactobacillus	0	0	82
1580833|Davidsoniella Z.W. de Beer, T.A. Duong & M.J. Wingf., 2014	0	0	2
1580844|Endoconidiophora	0	0	7
158483|Cedecea	7	10	0
1586368|unclassified Palpimanidae	0	0	1
158750|environmental samples	0	0	4
158752|environmental samples	0	0	2
158788|environmental samples	0	0	1
1588169|Psychomora	0	0	1
158846|Megamonas Shah and Collins 1983	0	0	12
158848|Moellerella	1	1	0
158851|Trabulsiella	3	2	0
158876|Yokenella	0	2	0
16|Methylophilus	0	0	1
160284|Mitrodetus	0	0	1
160674|Raoultella	19	32	1
1608298|Thiolapillus	1	0	0
1609233|Acidithrix	1	0	0
1611681|Mucinivorans	0	0	1
1621534|Paraglaciecola Shivaji and Reddy 2014	1	0	0
162291|Planomicrobium Yoon et al. 2001	0	0	4
1629875|unclassified Amphipleuraceae	0	1	0
163097|Chlorosarcina	0	1	0
1632778|Diaminobutyricibacter	0	0	2
163517|environmental samples	0	0	1
163527|environmental samples	0	0	1
163536|environmental samples	0	0	5
1637|Listeria	0	0	1
1643524|Fayochytriomyces W.J. Davis et al., 2015	0	0	2
1645|Renibacterium	0	0	1
1648511|Cnuella Zhao et al. 2014	0	0	3
1649295|Franconibacter Stephan et al. 2014	2	1	0
1649298|Siccibacter Stephan et al. 2014	1	0	0
1649459|Hungatella	0	0	1
1649477|Paraherbaspirillum	0	0	1
1649845|Yersinia pseudotuberculosis complex	16	12	0
165189|environmental samples	0	0	1
165301|Lentzea Yassin et al. 1995 emend. Nouioui et al. 2018	0	0	3
1654|Discomyces	0	0	10
1654067|Pantoea agglomerans group	26	32	2
1654951|Chilenodes	0	0	1
165695|Sphingobium Takeuchi et al. 2001 emend. Li et al. 2013	0	0	39
165696|Novosphingobium Takeuchi et al. 2001	0	0	3
165697|Sphingopyxis Takeuchi et al. 2001 emend. Baik et al. 2013	0	0	1
165779|Anaerococcus	0	0	2
1663|Arthrobacter	1	0	8
1671297|Neophaeomoniella	0	0	1
1671305|Aequabiliella	0	0	2
167234|environmental samples	0	0	2
16728|Hexastylis	0	0	1
1678|Tissieria	0	0	17
1679002|Methylopumilus	0	0	10
168470|Laribacter Yuen et al. 2002	0	1	0
168934|Thalassospira	0	0	2
16921|Camptotheca	0	0	3
1696|Brevibacterium	0	0	4
1698739|unclassified Hartmannella	0	0	1
169972|environmental samples	0	0	2
1712443|Cubabodes	0	0	1
171412|Eremococcus	0	0	2
171436|Tistrella Shi et al. 2003	0	0	1
1716|Turicella	5	0	66
171627|Gibberella fujikuroi complex	0	0	1
171718|environmental samples	2	0	0
172107|Nemertoderma	0	0	1
172620|Imshaugia S.L.F. Mey., 1985	0	0	1
172634|Parmotrema	0	0	1
1738651|Sphingoaurantiacus	0	0	1
1739576|Ceratocoma	0	0	1
1742989|Glutamicibacter	0	0	22
1742992|Paenarthrobacter	0	0	1
1742993|Pseudarthrobacter	0	0	11
1743|Propionicibacterium	0	0	2
174389|environmental samples	0	0	1
174630|unclassified Tipulidae	0	0	1
174951|Ramlibacter	0	0	3
175304|Lentibacillus Yoon et al. 2002 emend. Sun et al. 2016	0	0	1
175536|environmental samples	0	0	1
1755683|Candidatus Berkiella	1	2	0
1759400|Paramesorhizobium	0	0	1
1763|Mycobacterium	0	0	1
1763018|Cryptocoryneum	0	0	1
1763570|unclassified Sorangiineae	0	0	13
1765964|Acidihalobacter	3	0	0
176679|Furia	0	0	21
1769710|Sellimonas Seo et al. 2016	0	0	1
177938|Colpodella	0	0	1
1780190|Izhakiella	1	0	0
1795255|Zamolgus	0	0	1
180252|Marek's disease-like viruses	0	0	1
181050|Erynia	0	0	2
1810868|Mycoavidus	0	0	3
1813|Amycolatopsis	0	0	1
1817|Nocardia Trevisan 1889	0	0	5
1822464|Paraburkholderia	2	0	66
182687|environmental samples	0	0	1
182689|environmental samples	0	0	2
1827|Rhodococcus Zopf 1891	2	0	24
1827195|Caballeronia	0	0	19
1837871|Rupestriomyces	0	0	1
1838245|Polygona	0	0	1
1839|Nocardioides	0	0	4
1847|Pseudonocardia	0	0	2
1847725|Lawsonella	0	0	1
184923|Methylocapsa	1	0	0
1849530|Oblitimonas	0	0	4
1849828|Paeniclostridium	0	0	1
185283|unclassified Propionibacteriaceae	0	0	1
1855413|Xuhuaishuia Wang et al. 2016	0	0	3
1855419|Ursidibacter	0	1	0
1857532|Muribacter	0	1	0
1859059|Chasechloa	0	0	1
185978|unclassified Paenibacillus	0	0	1
185979|unclassified Bacillus	2	1	18
186035|Fragilariopsis	1	0	0
1861843|Terasakiispira Zepeda et al. 2015	0	0	1
186650|Microvirga	0	0	13
1866885|Mycolicibacterium	0	0	7
186789|Punavirus	23	20	0
186794|P22virus	4	1	0
1868332|Neomicrococcus	0	0	4
186928|unclassified Lachnospiraceae	0	0	10
1870884|Clostridioides	0	1	10
187110|Didunculus	0	0	6
187217|Tunavirus	15771	87	3
1873|Micromonospora	0	0	1
187492|Thalassolituus Yakimov et al. 2004	1	0	0
187694|Sinella	0	0	4
187734|Alternaria alternata sensu lato	0	0	177
188184|Nemertopsis	0	0	2
1883|Streptoverticillium	0	0	9
188544|Demodex	0	0	5
188905|Jannaschia Wagner-Dobler et al. 2003	0	0	1
189330|Dorea Taras et al. 2002	0	0	1
189384|Tremblaya	0	1	1
189613|Xanthomendoza S.Y. Kondr. & Karnefelt, 1997	0	0	1
189703|environmental samples	0	0	1
1897064|Cryptococcus neoformans species complex	0	0	1
1897124|Ozestheria	0	0	1
189774|unclassified Chloroflexi	0	0	92
190017|unclassified Pseudomonadaceae	0	1	0
1903434|Atlantibacter	4	6	0
1903506|Drancourtella	0	0	2
1905125|Sinocoelotes	0	0	1
1906657|Doolittlea	1	2	0
1906659|Hoaglandella	4	0	0
1906660|Mikella	1	2	0
1906661|Gullanella	3	1	0
1907535|Thiosymbion	1	0	0
191|Azospirillum Tarrand et al. 1979 (Approved Lists 1980) emend. Falk et al. 1985	0	0	2
1911549|Raineyella	0	0	1
191214|environmental samples	1	0	0
1912216|Cutibacterium	1	0	52
191456|Colobanthus	1	0	2
1917874|unclassified Christensenellaceae	1	0	0
1920255|unclassified Frankiales	0	0	1
1921004|Escherichia virus ADB2	1068	6	0
1921005|Shigella virus PSf2	983	4	0
1927833|Fukatsuia	3	1	0
192944|unclassified Rhodococcus	0	0	19
1935196|Congobacterium	0	0	2
1936028|Tintelnotia	0	0	1
1938374|Operational Group B. amyloliquefaciens	3	0	6
194|Campylobacter Sebald and Veron 1963 (Approved Lists 1980) emend. Vandamme et al. 2010	1	0	8
1940395|Caenibacillus Tsujimoto et al. 2016	0	1	0
194690|unclassified Pseudoalteromonas	3	6	1
194915|Eosentomon	0	0	3
195027|environmental samples	1	0	2
195043|environmental samples	0	1	0
1956453|Iviraiva	0	0	1
1956473|Misionella	0	0	1
1956574|Utivarachna	0	0	2
1960084|Rodentibacter	0	1	0
196013|Caldimonas Takeda et al. 2002	0	0	1
196159|unclassified Sphingomonas	1	1	229
196198|unclassified Stenotrophomonas	0	0	1
1962113|unclassified Chlorella	0	0	2
196773|unclassified Devosia	0	0	3
196779|unclassified Rhodobacter	1	0	0
196795|unclassified Sulfitobacter	0	0	2
196806|unclassified Psychrobacter	3	1	41
196814|unclassified Marinomonas	1	2	0
196816|unclassified Acinetobacter	5782	39	144
196818|unclassified Shewanella	2	3	1
196821|unclassified Pseudomonas	7	3	70
196869|unclassified Flavobacterium	0	0	3
196894|unclassified Siphoviridae	0	0	1
196894|unclassified Siphoviridae	36	27	2
196896|unclassified Myoviridae	3	2	0
196896|unclassified Myoviridae	16	5	0
198346|Candidatus Baumannia	6	7	0
198413|Oecobius	0	1	319
198705|Lampropedia	0	0	2
1988031|Promineofilum	0	0	1
19933|Diervilla	0	0	1
199549|Ancistrosyllis	0	0	2
199891|mealybug secondary endosymbionts	13	3	0
20|Phenylobacterium	0	0	2
2004797|Luteitalea Vieira et al. 2017	0	0	3
200670|Crenothrix	0	0	1
2008781|Annwoodia	0	0	23
2013|Nocardiopsis	0	0	3
2017784|Eutomopeas	0	0	1
202907|Collimonas	0	0	7
2031119|Jiulongibacter	1	0	0
203162|Pulsellum	0	0	4
2034|Curtobacterium Yamada and Komagata 1972	0	0	3
2034146|unclassified Chlamydomonas	0	3	0
203525|Cystobasidium	0	0	16
203697|Derxia	0	0	2
2038280|Robbsia	0	0	3
2039639|Nanopelagicus	0	0	14
204037|Dickeya	13	21	5
2044|Pimelobacter Suzuki and Komagata 1983	0	0	3
2045110|Sarcinofilum	4	0	0
2045111|Tupiella	2	0	0
204719|environmental samples	1	0	0
204744|Synchaeta	0	0	8
204870|environmental samples	0	0	2
2049887|Escherichia virus JMPW1	7125	40	3
2049888|Escherichia virus JMPW2	12765	52	1
2051062|Neobartsia Uribe-Convers & Tank, 2016	0	0	1
205112|Travisia	0	0	1
2053|Gordonia	0	0	2
2053310|Asulcocephalium Takahashi, Moestrup & Iwataki 2017	0	0	1
2055880|Pseudescherichia	1	0	0
2058189|Heterostelium	0	0	1
2059808|Devonomyces Videira & Crous, 2017	0	0	1
206375|Prolinoborus	56	0	0
2065321|Seltsamia	0	0	1
2071980|"Pararheinheimera" Sisinthy et al. 2017	0	0	6
207244|Anaerostipes	0	0	10
207402|Latonopsis	0	0	1
2081632|Parvodinium	0	3	0
208545|environmental samples	0	0	10
209|Helicobacter	1	0	4
209112|unclassified Bifidobacteriales	0	0	1
2094023|Glaesserella	2	1	0
209466|environmental samples	0	0	1
209474|environmental samples	0	0	1
209769|unclassified Ralstonia	0	3	1385
210001|Cheiracanthium	0	0	2
2100764|Mixta	14	9	1
210601|Nanofrustulum	1	0	0
210842|Hyalosira	0	2	0
2108460|unclassified Tl2011virus	3	7	0
211084|Actina	0	0	3
211445|environmental samples	0	0	1
211456|environmental samples	0	0	1
211524|unclassified Phytophthora	0	0	1
211868|Proscelotes	0	0	1
212041|environmental samples	0	0	1
212743|Rhizobacter	0	0	7
212791|Enhydrobacter Staley et al. 1987	1	0	2
213598|Coccinia Wight & Arn., 1834	0	0	1
213602|Trochomeria	0	0	1
2137249|Neptunicoccus	0	0	1
215579|Schlegelella	0	0	1
2161862|unclassified Bracteacoccus	0	0	1
216200|Xenosiphon	0	0	1
216740|Sellaphora	0	1	0
216746|Encyonema	1	0	0
216851|Faecalibacterium	0	0	23
2169924|Escherichia virus HK633	9	0	0
2169967|Escherichia virus DE3	1	0	0
2169968|Escherichia virus HK629	2	0	0
2172100|Limnobaculum	3	6	0
2174330|Stricosus	2	0	0
218083|environmental samples	4	6	0
218202|environmental samples	0	0	1
2183612|Klenkia	0	0	2
219025|unclassified Phoma	0	0	9
219181|Ottowia Spring et al. 2004 emend. Felfoldi et al. 2011	0	0	2
22|Shewanella	2	2	0
2200833|Flexiseps	0	0	1
2203166|Begonia sect. Pritzelia	0	0	1
222|Achromobacter Yabuuchi and Yano 1981 emend. Yabuuchi et al. 1998	0	1	8
222790|Sterictiphora	0	0	1
2231024|unclassified Fragilaria	1	0	0
223385|'Grimontella'	1	0	0
224135|Glomeribacter	0	0	1
224471|Burkholderiales genera incertae sedis	0	0	3
224577|environmental samples	0	0	1
224765|unclassified Prevotellaceae	0	0	5
2250122|Candidatus Bipolaricaulis	1	0	0
225143|Oceanisphaera	1	0	2
226|Alteromonas	1	0	2
22665|Trapa	0	0	1
227979|Jeotgalicoccus Yoon et al. 2003 emend. Liu et al. 2011	0	0	6
2282523|Methylorubrum	0	0	1
228953|environmental samples	0	1	0
229768|Achipteria	0	1	0
229833|Galumna	0	0	1
2302914|Chloropicon	0	0	1
2304465|Dactylodinium	0	0	3
2305133|unclassified Ruminococcaceae	0	0	1
23080|Itea	0	0	1
231454|Dyella Xie and Yokota 2005	0	0	1
231595|Loxosomella	0	0	1
2316020|"Mediterraneibacter" Togo et al. 2018	0	0	2
231619|Euchlanis	1	0	0
231683|Saccharospirillum	1	0	0
233793|environmental samples	0	0	1
234440|unclassified Intrasporangiaceae	0	0	1
235627|unclassified Arthrobacter	0	0	31
235634|unclassified Iodobacter	0	0	4
237|Flavobacterium	0	1	3
237547|Ramulispora	0	0	1
237584|Teratosphaeria Syd. & P. Syd., 1912	0	0	5
238085|Lichenomphalia	0	1	0
238201|environmental samples	20	45	0
238749|Diaphorobacter	1	0	2
238783|Pseudorhodobacter Uchino et al. 2003 emend. Lee et al. 2016	0	0	1
239173|environmental samples	4	6	2
240134|environmental samples	0	0	1
240895|Neurigona	0	0	4
241590|unclassified Glomeromycotina	0	0	2
242508|Dothistroma	0	0	1
244768|Seyrigia	0	0	1
245876|Nitratireductor	0	0	2
246570|unclassified Paracoccus	0	0	19
246797|environmental samples	2	2	0
246861|Grimontia Thompson et al. 2003 emend. Choi et al. 2012	0	1	0
24735|Ulmus	0	0	1
2490452|"Serpentinomonas" Suzuki et al. 2014	0	0	6
2499256|Alternaria sect. Eureka	0	0	1
2499261|Alternaria sect. Phragmosporae	0	0	8
2499262|Alternaria sect. Porri	0	0	28
2499271|Alternaria sect. Soda	0	0	20
251695|Pseudomonas syringae group genomosp. 1	2	2	0
2529408|Schaalia	0	0	1
254878|Penicillium chrysogenum species complex	0	0	3
255204|Zimmermannella	0	0	6
255623|unclassified Psocidae	0	0	1
2560409|Edwardsiella virus GF2	0	3	0
2560452|Escherichia virus RCS47	1	1	0
2560650|Proteus virus Isfahan	0	0	2125
2560732|Salmonella virus SJ46	0	1	0
2560763|Shigella virus ISF002	1305	10	0
256090|Leptochiton	0	0	1
2563343|unclassified Peduovirus	2701	2489	141
25666|Araucaria	0	2	0
2571160|Trinickia	0	0	1
257482|unclassified Proteus	0	2	0
257493|unclassified Aeromonas	4	3	5
257496|unclassified Curtobacterium	0	0	13
257820|Kerstersia	0	0	2
2585208|Trichonephila	0	0	16
259314|environmental samples	0	0	2
2593313|unclassified Penicillium	0	0	11
25934|Tetrameles	0	0	1
2593540|unclassified Helicobacter	0	0	6
2593658|unclassified Nostoc	0	0	2
2593676|unclassified Streptomyces	1	1	5
2594125|Piofontia	0	0	1
259956|environmental samples	0	0	28
2602519|unclassified Cordyceps	0	0	1
2603270|unclassified Armillaria	0	0	1
2603312|unclassified Diversispora	0	0	3
2605682|unclassified Simocephalus	0	0	3
2606521|unclassified Polypaecilum	0	0	10
260758|environmental samples	0	0	1
2608261|Stammera	0	1	0
2608887|unclassified Streptococcus	0	0	4
2608889|unclassified Escherichia	96	92	3
2608891|unclassified Enterococcus	0	0	1
2608897|unclassified Bifidobacterium	0	0	2
2608905|unclassified Propionibacterium	1	0	56
2608920|unclassified Ruminococcus	0	0	13
2608929|unclassified Klebsiella	15	41	3
2608935|unclassified Enterobacter	105	152	5
2608980|unclassified Methylomonas	0	0	2
2609248|unclassified Actinomyces	0	0	1
2609267|unclassified Nitrosospira	0	0	3
2609274|unclassified Thauera	0	1	1
2609279|unclassified Massilia	0	0	21
2609290|unclassified Microbacterium	0	0	91
2609414|unclassified Cobetia	2	1	0
2609466|unclassified Ferrovum	0	0	1
2609468|unclassified Sphingobacterium	0	0	3
2609666|unclassified Halomonas	2	6	2
2609956|unclassified Raillietiella	0	0	1
2609962|unclassified Haemophilus	0	0	1
2610821|unclassified Alternaria	0	0	46
2610881|unclassified Janthinobacterium	0	0	43
2610897|unclassified Hydrogenophaga	0	0	8
2611147|unclassified Sphingobium	0	0	45
2613769|unclassified Rhizobium	0	1	9
2613772|unclassified Sinorhizobium	0	0	4
2613784|unclassified Burkholderia	2	0	104
2613839|unclassified Delftia	0	0	10
2614124|unclassified Brevibacterium	0	0	2
2614126|unclassified Anaerococcus	0	0	1
2614128|unclassified Clostridium	0	0	2
2614628|unclassified Cladosporium	0	0	31
2614656|unclassified Salmonella	8	12	0
2614829|unclassified Idiomarina	1	0	0
2614943|unclassified Sphingopyxis	0	0	15
2614945|unclassified Altererythrobacter	0	0	4
2614947|unclassified Sphingorhabdus	0	0	4
2614972|unclassified Thalassotalea	1	1	0
2614977|unclassified Vibrio	1	13	2
2614992|unclassified Alteromonas	1	1	1
2615055|unclassified Cyclobacterium	0	0	1
2615065|unclassified Agrococcus	0	0	11
2615069|unclassified Nocardioides	0	0	12
2615080|unclassified Ornithinimicrobium	0	0	5
2615126|unclassified Starkeya	0	0	4
2615168|unclassified Vorticella	1	0	0
2615202|unclassified Hymenobacter	0	1	1
2615204|unclassified Paraburkholderia	0	0	3
2615210|unclassified Methylobacterium	2	0	89
2617518|unclassified Micromonospora	0	0	4
2617605|unclassified Ramlibacter	0	0	3
2617746|unclassified Microvirga	0	0	3
2617939|unclassified Dietzia	0	1	162
2618194|unclassified Aquamicrobium	0	0	1
261825|Agarivorans	2	0	0
2618311|unclassified Macrocheles	0	0	2
2618749|unclassified Scytonema	0	0	2
2618972|unclassified Prolinoborus	1	0	0
2619002|unclassified Cochliobolus	0	0	1
2619149|unclassified Calidifontibacter	0	0	2
2619320|unclassified Pseudonocardia	0	0	5
2619321|unclassified Thermus	0	0	3
2619396|unclassified Blastococcus	0	0	6
2619397|unclassified Glossiphonia	0	0	1
2619626|unclassified Calothrix	0	0	1
2619674|unclassified Anabaena	0	0	2
2619833|unclassified Microbulbifer	0	0	2
2619925|unclassified Hyphomicrobium	0	0	4
2619995|unclassified Kluyvera	1	0	0
262|Francisella	0	2	0
2620175|unclassified Cellulomonas	0	0	5
2620237|unclassified Virgibacillus	0	0	2
262037|Prenolepis	0	0	1
2620435|unclassified Lactobacillus	0	0	2
2620592|unclassified Pseudacidovorax	0	0	3
2620789|unclassified Aquabacterium	0	0	79
2620948|unclassified Micrococcus	2	0	23
2621013|unclassified Thioalkalivibrio	1	0	0
2621245|unclassified Bothriurus	0	0	1
2621553|unclassified Rhodanobacter	1	0	0
2621637|unclassified Arhodomonas	0	1	0
2621730|unclassified Leucobacter	0	0	1
2621818|unclassified Misgolas	0	0	1
2621847|unclassified Trichinella	0	0	1
2622293|unclassified Facklamia	0	0	1
2622317|unclassified Malkara	0	0	3
2622383|unclassified Thielavia	0	0	2
2622466|unclassified Dickeya	5	4	0
2622555|unclassified Stratiolaelaps	0	0	1
2622653|unclassified Brevundimonas	0	0	108
2622705|unclassified Xysticus	0	0	1
2622719|unclassified Erwinia	21	25	3
2622970|unclassified Gemmata	0	0	3
2623332|unclassified Pichia	0	0	2
2623379|unclassified Stylocellus	0	0	2
2623447|unclassified Deania	0	0	3
2623546|unclassified Deinococcus	0	0	41
2623579|unclassified Garypinus	0	0	1
2623678|unclassified Marasmius	0	0	1
2623750|unclassified Neisseria	0	0	4
2623841|unclassified Brachybacterium	0	0	29
2624094|unclassified Pandoraea	1	0	21
2624150|unclassified Herbaspirillum	0	0	8
2624195|unclassified Tetracyclus	0	0	1
2624378|unclassified Corynebacterium	0	1	33
2624428|unclassified Nitrosovibrio	0	0	1
2624446|unclassified Chrysoxys	0	0	1
2624466|unclassified Cellulosimicrobium	0	0	1
2624500|unclassified Methylosinus	0	0	1
2624793|unclassified Cellvibrio	0	1	7
2624912|unclassified Cinnamodendron	0	0	4
2625085|unclassified Lachnoanaerobaculum	0	0	2
2625155|unclassified Verrucomicrobium	0	0	1
2625313|unclassified Chrysemys	0	0	3
2625466|unclassified Thiomonas	0	0	3
2625648|unclassified Sarocladium	0	0	2
2625768|unclassified Krisna	0	0	1
2625913|unclassified Methylocystis	0	0	3
2626121|unclassified Phytomyza	0	0	1
2626134|unclassified Limnohabitans	0	0	28
2626197|unclassified Rhagidia	0	0	1
2626248|unclassified Frondihabitans	0	0	1
2626256|unclassified Megasphaera	0	0	1
2626333|unclassified Flexivirga	0	0	2
2626536|unclassified Pseudocercosporella	0	0	1
2626549|unclassified Actinoplanes	0	0	3
2626550|unclassified Blastomonas	0	0	18
2626686|unclassified Zelinkaderes	0	0	1
2626812|unclassified Aulacigaster	0	0	3
2626865|unclassified Achromobacter	0	0	75
2626922|unclassified Stenembia	0	0	2
2626967|unclassified Ismarus	0	0	1
2626991|unclassified Roseateles	1	0	3
2627005|unclassified Frigoribacterium	0	0	1
2627044|unclassified Zalmoxis	0	0	1
2627268|unclassified Thiorhodovibrio	1	0	0
2627301|unclassified Emticicia	0	0	9
2627319|unclassified Rhizopus	0	0	1
2627334|unclassified Kerriona	0	0	1
2627398|unclassified Leclercia	6	9	1
2627457|unclassified Syarinus	0	0	1
2627600|unclassified Raoultella	5	3	0
2627687|unclassified Tausonia	0	0	2
2627806|unclassified Arcuospathidium	0	0	3
2627922|unclassified Vitreoscilla	0	0	2
2628112|unclassified Gardnerella	0	0	1
2628216|unclassified Tenebrio	0	0	1
2628254|unclassified Conchoecia	0	0	1
2628350|unclassified Asticcacaulis	0	0	9
2628588|unclassified Siccibacter	0	1	0
2628841|unclassified Methylopila	0	0	2
2628852|unclassified Photobacterium	0	2	0
2628915|unclassified Pedobacter	0	0	2
2628974|unclassified Alishewanella	2	0	0
2629088|unclassified Luteimonas	0	0	4
2629148|unclassified Eurotium	0	0	1
2629175|unclassified Neorhizobium	0	0	4
2629395|unclassified Jatrophihabitans	0	0	1
2629414|unclassified Shigella	19	30	3
2629438|unclassified Thermocyclops	0	0	1
2629448|unclassified Neoramia	0	0	2
2629609|unclassified Ewingella	0	0	1
2629769|unclassified Nesterenkonia	0	0	48
2630031|unclassified Bordetella	0	0	1
2630038|unclassified Shimia	0	0	1
2630113|unclassified Nannobisium	0	0	1
2630143|unclassified Methylophilus	0	0	3
2630155|unclassified Diploneis	1	0	0
2630203|unclassified Limnobacter	0	0	10
2630262|unclassified Zanclea	0	0	1
2630292|unclassified Oceanobacillus	0	0	1
2630326|unclassified Pantoea	22	31	1
2630439|unclassified Haliscomenobacter	0	0	1
263066|Malikia Spring et al. 2005	0	0	1
2630699|unclassified Hyphomonas	0	0	1
2630922|unclassified Azospirillum	1	2	0
2631038|unclassified Cryocola	1	0	0
2631174|unclassified Oleiphilus	2	1	0
2631580|unclassified Bradyrhizobium	6	1	21
2631705|unclassified Tepidimonas	0	0	3
2631712|unclassified Meringa	0	0	3
2631772|unclassified Epipyxis	0	0	1
2631904|unclassified Tolypocladium	0	0	6
2631937|unclassified Lysilla	0	0	1
2632204|unclassified Polycirrus	0	0	1
2632271|unclassified Chrysopilus	0	0	1
2632435|unclassified Citricoccus	0	0	1
2632611|unclassified Agrobacterium	0	0	9
2632724|unclassified Asinibacterium	0	0	3
2632833|unclassified Xenorhabdus	0	1	0
2632876|unclassified Kosakonia	2	6	0
2633043|unclassified Phaeosphaeria	0	0	8
2633097|unclassified Erythrobacter	0	0	4
2633101|unclassified Micoletzkya	0	0	1
2633235|unclassified Methylibium	1	0	18
2633330|unclassified Enterovirga	0	0	1
2633371|unclassified Ensifer	1	0	0
2633465|unclassified Providencia	1	1	0
2633570|unclassified Aeromicrobium	0	0	3
2633591|unclassified Kitasatospora	0	0	2
2633738|unclassified Nematogenia	0	0	1
2634020|unclassified Monecphora	0	0	1
2634022|unclassified Salinicola	1	0	0
2634027|unclassified Methylovorus	0	0	2
2634050|unclassified Pseudoruegeria	0	0	1
2634062|unclassified Buttiauxella	3	0	0
2634148|unclassified Collimonas	0	0	4
2634434|unclassified Brenneria	1	2	0
2634919|unclassified Ideonella	0	0	4
2635087|unclassified Rahnella	1	8	15
2635268|unclassified Ochromonas	1	0	4
2635278|unclassified Arsukibacterium	0	0	1
2635306|unclassified Obesumbacterium	0	1	0
2635362|unclassified Lysobacter	0	0	4
2635712|unclassified Siphonobacter	0	0	14
2635796|unclassified Marplesia	0	0	1
2636157|unclassified Gemmobacter	1	0	4
2636252|unclassified Williamsia	0	0	1
2636315|unclassified Oceanimonas	1	3	3
2636428|unclassified Histioteuthis	0	0	1
2636472|unclassified Halobacillus	0	0	1
2636512|unclassified Sodalis	2	1	0
2636536|unclassified Alsobacter	0	0	1
2636825|unclassified Salinivibrio	4	2	0
2636909|unclassified Duganella	0	0	8
2636952|unclassified Poterioochromonas	0	0	14
2637378|unclassified Selenomonas	0	0	2
2637578|unclassified Roseburia	0	0	4
2637603|unclassified Asperspina	0	0	1
263762|environmental samples	2	2	1
263764|environmental samples	0	1	0
263766|environmental samples	0	1	0
263770|environmental samples	4	4	0
2637762|unclassified Nocardia	0	0	1
2637796|unclassified Sagitta	0	0	1
2637803|unclassified Neogloea	0	0	4
2637907|unclassified Tersicoccus	0	0	1
2637918|unclassified Mimetus	0	0	3
2637926|unclassified Phycicoccus	0	0	4
2637987|unclassified Moritella	1	2	1
2638132|unclassified Pelomonas	0	0	48
2638150|unclassified Fannia	0	0	1
2638319|unclassified Polaromonas	2	0	3
2638362|unclassified Catenovulum	0	0	1
2638500|unclassified Comamonas	0	0	10
2638544|unclassified Pseudorhodoferax	0	0	3
2638727|unclassified Treponema	0	0	5
2638842|unclassified Alcanivorax	0	2	1
2639466|unclassified Butyrivibrio	0	0	1
2639610|unclassified Stenoterommata	0	0	2
2639626|unclassified Rufibacter	0	0	2
2639704|unclassified Anoxybacillus	0	0	3
2640012|unclassified Synechocystis	0	0	2
2640036|unclassified Dinobryon	0	0	1
2640088|unclassified Rhizobacter	0	0	4
2640191|unclassified Rhodotorula	0	0	1
2640428|unclassified Galloisiana	0	0	3
2640577|unclassified Synura	0	0	1
2640670|unclassified Phenylobacterium	0	0	8
2640874|unclassified Cupriavidus	0	1	184
2640945|unclassified Polynucleobacter	0	0	3
2641084|unclassified Nitratireductor	0	0	3
2641286|unclassified Thiocapsa	1	0	0
2641808|unclassified Eucoptacra	0	0	1
2641838|unclassified Chromobacterium	0	1	2
2641856|unclassified Alloscardovia	0	0	1
2641902|unclassified Melaminivora	0	0	1
2642018|unclassified Paenisporosarcina	0	0	1
2642050|unclassified Afipia	0	0	1
2642061|unclassified Mecysmauchenius	1	0	0
2642106|unclassified Propioniferax	0	0	1
2642155|unclassified Microcoleus	0	0	15
2642329|unclassified Aneurinibacillus	0	0	1
2642360|unclassified Bosmina	0	0	2
2642424|unclassified Lelliottia	3	1	0
2642485|unclassified Myroides	0	0	1
2642494|unclassified Mycobacterium	0	0	15
2642558|unclassified Pseudogulbenkiania	0	0	1
2642661|unclassified Marmoricola	0	0	1
2642720|unclassified Entomoneis	2	0	0
2642959|unclassified Paucibacter	1	0	1
2643009|unclassified Tanystylum	0	0	2
2643062|unclassified Shinella	0	0	6
2643271|unclassified Anaerovibrio	0	0	1
2643291|unclassified Ptychodera	0	0	2
2643294|unclassified Methylotenera	0	0	5
2643346|unclassified Tetrasphaera	0	0	17
2643372|unclassified Libocedrus	0	0	2
2643866|unclassified Modestobacter	0	0	2
2644090|unclassified Sutterella	0	0	1
2644389|unclassified Citrobacter	27	24	1
2644549|unclassified Sphingosinicella	0	0	1
2644606|unclassified Actinoalloteichus	0	0	1
2644629|unclassified Exiguobacterium	0	0	3
2644699|unclassified Ero	0	0	1
2644704|unclassified Aminobacter	0	0	1
2644724|unclassified Enoploctenus	0	0	8
2644732|unclassified Novosphingobium	0	0	9
2645054|unclassified Mannheimia	0	1	0
2645081|unclassified Ottowia	0	0	17
2645437|unclassified Elstera	0	0	1
2645455|unclassified Amblyseius	0	0	2
2645462|unclassified Tetrataenia	0	0	3
2645484|unclassified Mangrovibacter	4	2	0
2645491|unclassified Caenimonas	0	0	1
2645757|unclassified Gordius	0	0	1
2645844|unclassified Pahoroides	0	0	26
2645960|unclassified Paraphrynus	0	0	1
2645988|unclassified Yonghaparkia	0	0	4
2646048|unclassified Alicycliphilus	0	0	2
2646097|unclassified Bacteroides	0	0	2
2646205|unclassified Chroococcidiopsis	0	0	21
2646260|unclassified Rectijanua	0	0	8
2646444|unclassified Mycosphaerella	0	0	1
2646475|unclassified Diradius	0	0	1
2646630|unclassified Cryptocellus	0	0	1
2647060|unclassified Arctiostrotus	0	0	1
2647315|unclassified Aureobasidium	0	0	5
2647418|unclassified Deinopis	0	0	5
2647522|unclassified Serratia	20	24	1
2647621|unclassified Cladocopium	0	0	1
2647624|unclassified Pseudocercospora	0	0	1
2648076|unclassified Neurochaeta	0	0	1
2648079|unclassified Blautia	0	0	12
2648130|unclassified Minona	0	0	1
2648159|unclassified Peptococcus	0	0	1
2648619|unclassified Laemoglyptus	0	0	2
2648686|unclassified Labrenzia	0	0	1
2648776|unclassified Mitsuaria	0	0	4
2648921|unclassified Caulobacter	0	0	10
2648980|unclassified Pontibacter	0	0	4
2648997|unclassified Thalassospira	0	1	2
2649231|unclassified Pycnophyes	0	0	2
2649277|unclassified Cyanothece	0	0	1
2649294|unclassified Janibacter	0	0	2
2649512|unclassified Brachyspira	0	0	2
2649542|unclassified Tatumella	2	4	0
2649579|unclassified Kocuria	0	0	25
2649625|unclassified Citreicella	0	0	1
2649727|unclassified Iridomyrmex	0	0	1
2649760|unclassified Diaphorobacter	0	0	1
2649764|unclassified Cronobacter	2	8	0
2649820|unclassified Gelanor	0	0	2
2649846|unclassified Cedecea	1	0	0
2649915|unclassified Sandarakinorhabdus	0	0	2
2649957|unclassified Candidatus Stammerula	0	1	0
2649964|unclassified Hyomesalges	0	0	1
265|Paracoccus	0	0	16
2650499|unclassified Leptolyngbya	0	0	2
2652971|unclassified Orbilia	0	0	1
2653178|unclassified Bosea	0	0	28
2653513|unclassified Yersinia	0	5	0
265542|Minutocellus	1	0	0
2657482|unclassified Gordonia	0	0	3
265976|Serinicoccus Yi et al. 2004 emend. Xiao et al. 2011	0	0	3
2660153|unclassified Orthocladius	0	0	18
2662419|unclassified Planococcus	0	0	1
2663263|unclassified Aquabacter	0	0	2
2663824|unclassified Leifsonia	0	0	1
2663846|unclassified Arsenicicoccus	0	0	4
2675230|Cytobacillus	0	0	2
2675232|Neobacillus	0	0	3
2675234|Alkalihalobacillus	0	0	7
2676060|Allopseudarcicella	0	0	1
2676541|unclassified Edwardsiella (in: Bacteria)	1	0	0
2676560|unclassified Syntrophus (in: Bacteria)	0	0	1
2676603|unclassified Rivularia (in: Bacteria)	0	0	2
2676617|unclassified Preussia (in: Fungi)	0	0	10
2676636|unclassified Actinella (in: Bacillariophyta)	4	0	0
2676648|unclassified Coxiella (in: Bacteria)	0	1	1
2676700|unclassified Heterococcus (in: Xanthophyceae)	0	0	1
2676755|Croceibacterium	0	0	3
2678886|Pulveribacter	0	0	5
2680004|Protaetiibacter	0	0	1
2680021|Ephemeroptericola	0	0	3
2683265|unclassified Porphyrobacter	0	0	2
2684926|unclassified Acidovorax	0	0	58
2685023|unclassified Asaia	0	1	0
2685195|unclassified Licmophora	1	0	0
2685271|unclassified Curvibacter	0	0	4
2685557|unclassified Branchiibius	0	0	6
2685633|unclassified Trixoscelis	0	0	1
2685772|unclassified Scaptognathus	0	0	1
2685792|unclassified Leclercera	0	0	1
2685842|unclassified Rhodomonas	0	0	3
2685852|unclassified Moraxella	0	0	5
2685927|Tardibacter	0	0	3
2688300|unclassified Buchnera (in: Bacteria)	0	0	2
2688679|unclassified Meira (in: Fungi)	0	1	0
2689056|unclassified Rothia (in: Bacteria)	0	0	5
2689088|unclassified Candida (in: Saccharomycetales)	0	0	1
2699295|Embleya	0	0	1
270|Thermus	1	0	9
2701|Gardnerella	0	0	6
2706|Microcitrus Swingle	0	0	3
270892|Arachnocampa	1	0	0
271059|environmental samples	1	0	0
2720871|Aspergillus subgen. Circumdati W. Gams, M. Chr., Onions, Pitt & Samson, 1985	0	0	106
2720872|Aspergillus subgen. Fumigati W. Gams, M. Chr., Onions, Pitt & Samson, 1985	0	0	5
2720874|Aspergillus subgen. Aspergillus	0	0	7
272217|Cales	0	0	1
272352|Signiphora	0	0	1
273030|Poecilochaetus	0	0	1
27320|Metschnikowia T. Kamienski, 1900	0	1	0
2732980|Felsduovirus	2	1	0
2734022|Escherichia virus IME18	6508	41	0
2734023|Escherichia virus SH2	47842	208	21
2734025|Shigella virus ISF001	88	0	0
2734026|Shigella virus Sfin1	936	4	7
2734027|Shigella virus SH6	1555	12	0
2742|Marinobacter	2	0	0
2745|Volcaniella Quesada et al. 1990	8	1	4
2747|Carnobacterium	0	0	1
2748764|Escherichia virus HK620	0	1	0
2752542|Talaromyces sect. Islandici	0	0	4
27529|Orussus	0	0	4
2757714|unclassified Enterobacter cloacae complex	24	23	1
2759633|Pseudagkistrodon	0	0	3
2767842|Lactiplantibacillus Zheng et al. 2020	0	2	7
278059|Chilobrachys	0	0	1
2781|Gracilariopsis	0	0	1
279888|unclassified Symbiodinium	0	0	1
28065|Rhodoferax	0	0	1
28105|Sinorhizobium	0	0	1
281459|Nerada	0	0	1
28154|Bisgaard taxa	0	1	0
281915|Curvibacter	0	0	7
28231|Trichlorobacter	1	0	0
282354|Harveyella	0	0	1
28253|Marinomonas van Landschoot and De Ley 1984 emend. Espinosa et al. 2010	5	1	0
283|Comomonas	0	0	50
284010|environmental samples	7	22	0
2842|Skeletonema	1	1	0
28453|Sphingobacterium Yabuuchi et al. 1983 emend. Wauters et al. 2012	0	0	22
2849|Phaeodactylum	3	1	1
285107|Thioclava Sorokin et al. 2005 emend. Zhang et al. 2013	0	0	2
2852|Cylindrotheca	2	3	1
286|Serpens	7	1	30
286548|environmental samples	0	0	1
286563|Devriesia Seifert & N.L. Nick., 2004	0	0	1
286660|Peltaster Sydow & P. Sydow 1917	0	0	1
2871|Costaria	1	0	1
289415|Proctophyllodes	0	0	6
29002|Cercospora	0	0	1
290180|Roseivirga	0	0	3
290425|Tetrathiobacter	0	0	1
290593|environmental samples	0	0	1
290601|environmental samples	0	0	5
290910|unclassified Loktanella	0	0	1
2924|Alexandrium	1	0	0
29278|vectors	2	2	0
293323|environmental samples	0	1	0
293334|environmental samples	1	0	0
293404|environmental samples	0	0	1
2944|Prorocentrum	1	0	4
29487|Photorhabdus	20	20	0
2949|Symbiodinium	0	0	1
29521|Serpulina	0	0	14
29574|Taylorella Sugimoto et al. 1984	0	0	2
29580|Janthinobacterium	0	0	6
296193|Trouessartia	0	0	1
2976|Vaucheria	1	0	0
297738|Cyphophthalmus	0	0	1
2985|Ochromonas	0	0	5
2988|Mallomonas	4	1	1
29901|Mrakiella	0	0	3
2991|Synura	4	0	1
2995|Hydrurus	3	1	1
3002|Bacillaria	1	0	0
3004|Rhizosolenia	1	0	4
300848|environmental samples	0	1	0
3011|Fucus	0	1	0
301273|Ptilomera	0	0	1
3015|Sargassum	1	0	0
302485|Phaeobacter	0	0	1
303379|Herminiimonas	0	0	1
3052|Chlamydomonas	0	0	1
305752|unclassified Enterobacteriales (miscellaneous)	4	5	1
305899|Endozoicomonas	2	0	0
306876|Readeriella Syd. & P. Syd., 1908	0	0	2
307016|unclassified Polyxenidae	0	0	1
307506|Raphidocelis	0	0	1
307613|Ilyphagus	0	0	2
308580|Antennella	0	0	1
308865|Elizabethkingia	0	0	3
309357|Saccharina	1	0	4
309512|Dinoroseobacter	0	0	1
309584|Yaurina	0	0	5
309982|unclassified Pleosporaceae	0	0	4
310607|environmental samples	0	0	1
312142|environmental samples	0	0	2
312278|Emticicia	0	0	6
312470|Neobodo	0	0	1
31257|Stylochus	0	0	1
31311|Nephroselmis Stein, 1878	0	0	2
31339|Desmarestia	0	0	1
314007|environmental samples	0	0	2
314122|Dactylellina	0	0	1
31454|Grateloupia	0	0	2
316086|environmental samples	0	0	9
316340|unclassified Chaetothyriales	0	0	1
3164|Tetraselmis	0	1	0
317669|Phrynichus	0	0	1
317678|Damon	0	0	3
318149|environmental samples	0	0	1
318198|Coeliaxis	0	0	1
3189|Scherffelia	1	0	0
32008|Pseudomonas RNA homology group II	1	0	12
32012|Thiomonas	0	0	3
32014|Ioeidobacter	0	0	1
32036|sulfur-oxidizing symbionts	1	2	2
32199|Buchnera Munson et al. 1991	0	1	0
32207|Stomatococcus	0	0	11
32257|Kingella	0	0	1
323449|Pontibacter	0	0	4
32351|melanogaster subgroup	0	1	0
32415|Ropronia	0	0	4
3246|Selaginella	0	0	6
32506|Palaeolamprologus	0	0	1
325217|unclassified Mesorhizobium	0	0	3
326996|Baseodiscus	0	0	3
328841|Dictyosporium	0	0	1
329158|unclassified P22-like viruses	6	0	0
329895|Nannopus	0	0	1
33001|Desulfurella	0	1	0
33024|Phascolarctobacterium	0	0	1
33042|Coprococcus	0	0	1
3319|fir trees	0	0	9
33194|Cochliobolus	0	0	3
33196|Botrytis	0	0	2
3321|Cedrus Trew, 1755	0	0	3
3328|Picea	0	0	3
332958|environmental samples	1	2	0
333132|Voromonas	0	0	1
33504|Phoronis	0	0	10
33508|Sexostrea	0	0	2
33639|Asterionellopsis	1	0	0
33644|Fragilaria	2	0	0
336488|unclassified Agelenidae	0	0	1
336509|unclassified Thomisidae	0	0	5
336830|Arsukibacterium	0	0	1
337004|Microcella Tiago et al. 2005 emend. Tiago et al. 2006	0	0	4
337339|lice endosymbionts	1	6	0
338|Xanthomonas	0	0	2
33807|unclassified Alphaproteobacteria	0	0	11
33809|unclassified Betaproteobacteria	0	0	16
33811|unclassified Gammaproteobacteria	11	21	10
338267|Asplanchnopus	1	0	0
33858|environmental samples	1	0	2
33874|Planopolyspora	0	0	2
33882|Microbacterium	0	0	28
338912|Epiphanes	0	0	19
339423|Praticolella	0	0	1
33986|Exiguobacterium	1	1	4
34033|environmental samples	0	1	6
34037|Rahnella	2	1	4
340709|environmental samples	0	0	1
34072|Variovorax Willems et al. 1991	0	0	11
3418|Drimys	0	0	1
34416|Microbotryum	0	0	1
34482|Zoophthora	0	0	3
345401|Irus	0	0	1
3459|Coriaria	0	0	1
34699|Cyphomyrmex	0	0	5
347014|Averyella	0	1	0
347533|Zobellella	2	0	1
348171|Sartidia	0	0	2
348401|Mecaphesa Simon, 1900	0	0	3
349921|environmental samples	0	0	1
3511|Quercus	0	0	21
35127|Thalassiosira	1	2	0
35129|Asterionella	2	0	3
3515|Alnus	0	0	2
35167|Amphiroa	0	1	0
352450|Simplicispira	0	0	4
353794|environmental samples	1	0	0
353857|environmental samples	0	1	0
354276|Enterobacter cloacae complex	330	350	17
354349|Pseudochrobactrum	0	0	1
35510|Equus subg. Equus	0	0	2
355245|unclassified Tunavirus	4587	27	2
35571|Bradysia	0	0	5
35588|Myxosoma	0	0	1
35590|Henneguya	0	0	1
355929|Yonghaparkia Yoon et al. 2006	0	0	1
3573|Steris	0	0	1
35766|environmental samples	0	0	18
35798|Nitrosospira Winogradsky and Winogradsky 1933	0	0	4
359373|environmental samples	0	0	1
360660|Encentrum	1	0	7
360668|Lindia	0	0	1
361177|Altererythrobacter	0	0	9
361669|Hemiflagellochloris	0	0	4
362313|Pleuroxus	0	0	1
363886|unclassified Xanthobacteraceae	0	0	1
3653|Citrullus	0	0	33
3660|squashes	0	0	1
366614|Haematobacter	0	0	1
366933|Samaris	0	0	1
368001|environmental samples	1	0	0
3684|Tetrapathea	1	0	0
36862|Ideonella	0	0	2
36866|unclassified Enterobacteriaceae	67	62	4
3689|Populus	0	0	2
369107|Pheidologeton	0	0	1
36967|Nyctibora	0	0	1
369874|Heterophlebus	0	0	3
3705|Brassica	0	0	1
373301|Pentanymphon	0	0	1
37384|Gongrosira	0	0	1
374|Bradyrhizobium	3	1	6
374469|Vanderwaltozyma	0	1	0
37452|unclassified CFB group (miscellaneous)	0	0	31
374940|Sphaeropthalma	0	0	1
37820|Hydrostachys Thouars, 1805	0	0	6
378210|Methyloversatilis	0	0	2
37827|Eucnide Zucc., 1844	0	0	1
37839|unclassified Dothideales	0	0	2
37852|Aphidius	0	0	1
379|Rhizobium	0	0	1
37914|Dietzia	0	0	327
37933|Tolypella	0	0	1
380047|environmental samples	0	0	1
3808|Acacia	0	0	1
3817|Arachis	0	0	1
382381|Discostella	1	1	0
38334|Halichrysis	0	0	1
3853|Lathyrus	0	0	2
38721|Zoysia	0	0	1
3875|Macrotyloma (Wight & Arn.) Verdc., 1970	0	0	6
3877|medics	0	0	1
3883|Phaseolus	0	0	2
388977|Zygiella	0	0	1
38946|Paracoccidioides	0	0	1
389730|Cyclocosmia	0	0	1
389745|Cethegus	0	0	1
389767|Poecilomigas	0	0	1
390516|environmental samples	0	1	0
390851|unclassified Paradoxosomatidae	0	0	5
390858|Otostigmus	0	0	1
391952|Aquincola	0	0	2
39196|Hamigera	0	0	1
39217|Macrostomum	0	0	12
393224|Holcolaetis	0	0	1
395590|Zasmidium	0	0	1
39702|Septoria	0	0	5
397551|Glycinde	0	0	7
39779|unclassified Clostridiales	0	0	2
3980|Hevea	0	0	1
39965|Hypsizygus Singer, 1947	0	0	2
400531|environmental samples	0	0	3
400634|Lysinibacillus	0	0	5
40070|unclassified Chordopoxvirinae	0	0	1
401169|Paramblyops	0	0	1
402593|environmental samples	1	0	0
403068|environmental samples	0	0	1
40323|Stenotrophomonas	0	0	1
40443|Gloeophyllum	0	0	2
404432|Salinicola	3	0	0
404755|environmental samples	0	0	1
4053|Panax	0	0	4
40544|Sutterella Wexler et al. 1996	0	0	1
407|Protomonas Urakami and Komagata 1984	0	1	45
407217|Aquitalea	0	1	0
408169|metagenomes	874	1480	480
4085|Nicotiana	0	0	1
40903|environmental samples	0	0	1
410656|organism-associated metagenomes	189	174	605
410657|geographical metagenomes	31	9	181
410829|Sugiyamaella	0	2	0
411558|Burgoa	0	0	1
41201|Ewingella	0	0	1
41247|Mycena	0	0	1
41254|Mycosphaerella	0	0	2
41275|Brevundimonas Segers et al. 1994 emend. Abraham et al. 1999	0	0	23
41292|unclassified Rhizobiales	0	0	14
41296|unclassified Rhodospirillaceae	0	0	1
413496|Cronobacter	50	78	4
416|Methylomonas	1	0	1
416916|Aggregatibacter	0	3	0
417295|unclassified Verrucomicrobia	0	0	3
41783|Lardizabala	0	0	2
41809|Camptochironomus	0	0	12
41955|Amanita	0	0	1
42|Cystobacter	0	0	9
42054|Chromohalobacter Ventosa et al. 1989 emend. Arahal et al. 2001	0	0	2
421605|unclassified Neisseriaceae	0	0	1
42244|Macrobiotus	0	0	1
42255|Rubrobacter Suzuki et al. 1989 emend. Albuquerque et al. 2014	0	0	10
422608|unclassified Herpotrichiellaceae	0	0	10
423247|Alonopsis	0	0	1
423252|Dumontia Santos-Flores & Dodson, 2003	0	0	1
423349|Mucilaginibacter	0	0	3
426668|Ulnaria	6	2	0
426677|Hyalosynedra	1	0	0
429|Methylobacter	0	0	1
430933|Gnathonarium	0	0	1
43363|horse chestnuts	0	0	2
433923|Pseudacidovorax	0	0	1
434|Ulvina	0	0	2
43462|Cinchona	0	0	1
43668|Brachybacterium	0	0	42
43971|Blastobotrys	0	1	0
44000|Caldicellulosiruptor	1	0	0
44013|Polynucleobacter	0	0	39
4418|water-lilies	0	0	1
44260|Moorella	0	2	0
4427|Ceratophyllum	0	0	1
44417|Cyclospora	0	0	2
445|Sarcobium	7	2	4
44566|Pseudoneochloris Watanabe, 2000	1	0	0
446042|environmental samples	0	0	11
446045|Drosophila serrata species complex	0	0	2
44744|Haematococcus	0	0	1
447792|Phytobacter Zhang et al. 2017 emend. Pillonetto et al. 2018	4	3	0
45059|Frankliniella	0	0	1
450754|environmental samples	0	0	7
4512|Hordeum	0	2	0
45128|Clathrina	0	0	1
45132|Botryosphaeria	0	0	1
451512|Mangrovibacter	0	3	0
4520|Lolium	0	0	1
45234|Cordyceps	0	0	3
4527|Porteresia	0	0	2
45299|Clathrospora	0	0	1
453578|environmental samples	0	0	5
45402|Aquabacter	0	0	2
45426|unidentified Ascomycota	0	0	2
45617|Human Mmtv-Like retrovirus	0	0	77
4564|Triticum	0	0	8
45662|Desulfohalobium	0	1	0
4575|Zea	0	0	5
4583|Cenchrus	0	0	60
46093|Limonium	0	0	349
46123|Abiotrophia	0	0	3
46216|Ablabesmyia	0	0	1
46254|Oenococcus	0	0	2
46255|Weissella	0	0	1
46352|Agrococcus	0	0	2
463684|Neoscytalidium	0	0	2
46635|Hormonema	0	0	2
467980|Penidiella	0	0	1
468707|Choerades Walker, 1851	0	0	1
468729|Eudioctria	0	0	1
468737|Hoplistomerus	0	0	1
4688|Lilium	0	0	4
468807|Stiphrolamyra	0	0	1
469|Acinetobacter	2719	14	89
46913|Vasilyevaea Yee et al. 2010	0	0	3
470018|Rachicladosporium	0	0	1
470063|Toxicocladosporium	0	0	1
47025|Dactylella	0	0	1
47120|Notommata	0	0	1
47198|Otidea	0	0	1
472932|unclassified Tetragnathidae	0	0	6
4732|Typha	0	0	1
47420|Hydrogenophaga Willems et al. 1989	0	0	10
47424|Armillaria	0	0	1
475|Moraxella (subgen. Branhamella)	11	4	45
47578|Atelopus	0	0	2
4780|Plasmopara	0	0	53
4783|Phytophthora	0	0	3
47925|environmental samples	0	1	38
47926|environmental samples	4	1	149
47928|low G+C firmicute environmental samples	0	1	2
47936|environmental samples	3	1	52
47938|environmental samples	26	76	3
48073|Microbulbifer	0	2	0
48075|Marinobacterium	1	0	0
480915|Hygrobates	0	0	1
48130|Amorpha L., 1753	0	0	1
482|Neisseria Trevisan 1885	10	6	17
4830|Mucor	0	0	9
4842|Rhizopus	0	0	52
48479|Eubacteria environmental samples	4130	2050	3095
48504|environmental samples	0	0	1
48510|environmental samples	0	0	6
48531|Burmannia	0	0	2
48558|Pyricularia	0	0	14
486340|Thomisus Walckenaer, 1805	0	0	1
487009|environmental samples	0	0	1
48731|Bouteloua	0	0	53
487348|environmental samples	0	0	2
48736|Ralstonia Yabuuchi et al. 1996	3	4	3404
487613|Cymadothea	0	0	1
489203|Crassanapis	0	0	5
490353|Flamella	0	0	1
4910|Kluyveromyces Van der Walt, 1956	0	3	0
4919|Pichia	0	1	0
49237|Chaetoceros	4	0	0
4930|Saccharomyces	0	1	43
494041|Ophiognomonia	1	0	0
4943|Saccharomycopsis	0	1	0
4948|Torulaspora	0	0	2
4951|Yarrowia Van der Walt & Arx, 1981	0	0	3
497|Psychrobacter	1	5	17
49712|Doryanthes	0	0	1
49800|Cercis	36	0	2
498725|environmental samples	0	0	1
49928|unclassified Eubacteria (miscellaneous)	92	129	81
501783|Cloacibacterium	0	0	6
504090|Kushneria	0	1	0
50423|gamma proteobacteria environmental samples	23	41	12
504438|Isodiametra	0	0	3
5052|Polypaecilum	0	0	64
50559|environmental samples	0	0	1
507|Alcaligenes	0	0	3
507008|Anomiopsyllus	0	0	1
5073|Penicillium	0	0	25
50742|environmental samples	0	1	7
507510|Hyphopichia	0	1	0
5092|Byssochlamys Westling, 1909	0	0	3
50935|Physcia	0	0	1
5094|Talaromyces	0	0	1
50949|Navicula	8	3	0
510445|Calohypsibius	0	0	1
510448|Pseudechiniscus	0	0	1
51137|Pimephales	0	0	3
511678|Aliivibrio Urbanczyk et al. 2007 emend. Beaz-Hidalgo et al. 2010	0	4	0
5121|Erysiphe	0	0	7
512291|environmental samples	0	0	2
512311|environmental samples	1	2	0
51333|Rhynchobodo	0	0	2
51366|Salinivibrio	1	1	0
517|Bordetella	1	2	26
5182|Hymenoscyphus	0	0	2
518733|Phycicola	0	0	1
52018|unclassified Actinomycetes	0	0	6
52052|Nemertinoides	0	0	1
52282|Sarcoptes	0	0	1
52558|Tessellaria	1	0	0
5265|Gymnosporangium	0	0	2
52669|Austrofundulus	0	0	12
5277|Mastigobasidium	0	0	1
52927|Nerita	0	0	1
5296|Puccinia	0	0	17
53|Nannocystis	0	0	1
5314|Ganoderma	1	0	0
53246|Pseudoalteromonas	14	3	2
5328|Spongipellis	0	0	1
53335|Pantoea	46	57	7
53387|Friedmanniella	0	0	5
53457|Janibacter	0	0	8
535|Chromobacterium	0	0	3
538|Eikenella	2	0	1
54033|Monacrosporium	0	0	1
5406|Exobasidium Woronin, 1867	0	0	1
5410|Cystofilobasidium	0	0	1
541002|environmental samples	0	0	3
54197|unclassified Saccharomycetes	0	0	2
5422|Kabatiella	0	0	1
54393|unclassified Moraxellaceae	4	0	1
544|Levinea Young et al. 1971	43	32	3
544447|unclassified Erysipelotrichaceae	0	0	2
54522|environmental samples	0	0	1096
5453|Ascochyta	0	0	1
54683|Lanzia	0	0	2
54695|unidentified Leotiales	1	0	0
547|Enterobacter	2	3	0
54873|Gleditsia	0	1	0
54917|Ophichthus	0	0	2
5498|Cladosporium	1	0	149
54981|Valvata	0	0	6
5502|Curvularia	0	1	7
5506|Gibberella	0	0	1
551|Erwinia Winslow et al. 1920 (Approved Lists 1980) emend. Hauben et al. 1999	29	34	12
55170|Peyronellaea	0	0	1
55193|Malassezia	2	0	24
5533|Rhodotorula	0	0	6
5538|Scytalidium	0	0	2
55412|Kirchneriella	0	0	2
5543|Trichoderma	0	0	2
55703|Acanthochiton	0	0	1
5579|Aureobasidium Viala & G. Boyer, 1891	0	0	2
558017|GV	0	0	2
5583|Wangiella	1	0	0
5587|Rhinocladiella	0	0	5
5600|Phialophora	0	0	2
560275|unclassified Lestremiinae	0	0	1
560756|Metaforcipomyia	0	0	2
560780|Symmerus	0	0	1
561|Escherichia	7313	6762	921
5637|Polyporus	0	1	0
565224|environmental samples	0	0	1
56696|Phallusia	0	0	1
568|Hafnia	2	1	2
568987|Hamiltonella	2	3	0
569360|Fusarium sambucinum species complex	0	0	4
569442|Cyclosalpa	0	0	1
569836|unclassified Chitinophagaceae	0	0	1
570|Klebsiella Trevisan 1885 (Approved Lists 1980) emend. Drancourt et al. 2001	1428	1022	67
5714|Herpetomonas	0	0	1
572511|Blautia	0	0	2
573657|Hodgkinia	0	1	0
574054|Sobarocephala	0	0	1
57461|Pleochaeta	0	0	3
57493|Pelczaria	0	0	30
57494|Nesterenkonia Stackebrandt et al. 1995 emend. Li et al. 2005	0	0	50
575214|Daphnia laevis group	0	0	8
5754|Acanthamoeba	0	0	5
575425|environmental samples	0	0	3
575656|environmental samples	0	1	0
576134|Phialocephala fortinii species complex	0	0	1
57702|environmental samples	0	0	1
57727|environmental samples	1	2	2
57729|Alternaria sect. Embellisia	0	0	2
57731|environmental samples	0	2	81
578833|Pseudomonas stutzeri subgroup	4	0	7
579|Kluyvera	1	6	1
5790|Physarum	0	0	4
5792|Didymium	0	0	2
58050|Moritella Urakawa et al. 1999	2	1	0
581|Morganella	21	19	2
581186|environmental samples	0	0	8
5812|Sarcocystis	0	0	752
582472|Wohlfahrtiimonas Toth et al. 2008	0	1	0
58277|Monoculicoides	0	0	6
583|Proteus	17	19	1
586|Providencia	8	20	0
5864|Babesia Starcovici, 1893	0	0	1
58732|Diachasmimorpha	0	0	56
5884|Paramecium	2	0	2
58841|environmental samples	0	0	1
59|Vitreoscilla	0	0	4
590|Salmonella	444	412	19
59352|Platanthera	1	0	0
59585|Corynespora	0	0	2
59619|environmental samples	0	0	27
59732|Sejongia Yi et al. 2005	0	0	1
59753|Fundibacter	0	0	5
599652|Tropicimonas	0	0	1
60057|Isertia	0	0	1
602976|Axinidris	0	0	1
603009|Anergates	0	0	1
6083|Pelmatohydra	0	0	25
60849|Vorticella	0	0	6
60964|Cambarus	0	0	2
613|Serratia	92	103	17
61417|Spiromyces	0	0	1
61432|unclassified Flavobacteriaceae	0	0	1
61894|Achelia	0	0	1
61903|Belisarius	0	0	1
61964|environmental samples	10	3	79
620|Shigella	1331	1338	135
62104|environmental samples	2	0	8
622681|Planktophila	0	0	26
626|Xenorhabdus Thomas and Poinar 1979 (Approved Lists 1980) emend. Thomas and Poinar 1983	19	24	4
62669|environmental samples	0	0	1
627141|Pseudomonas nitroreducens/multiresinivorans group	0	0	1
627824|Macromusonia	0	0	1
62798|Trigonopteryx	0	0	1
629|Yersinia	39	46	7
63084|Tamarix	0	0	2
63228|Proasellus	0	0	1
6333|Trichinella	0	0	160
63429|Leptopilina	0	0	2
635|Edwardsiella Ewing and McWhorter 1965	31	20	4
635216|Alcimochthes Simon, 1885	0	0	1
635329|Simorcus Simon, 1895	0	0	1
635338|Strophius	0	0	1
637|Arsenophonus	59	52	15
642|Aeromonas Stanier 1943	20	17	26
6445|Sipunculus	0	0	1
645024|environmental samples	1	0	0
64616|Amylomyces	0	0	8
64704|Chrysolepidomonas	1	0	1
649460|Filimonas Shiratori et al. 2009 emend. Albert et al. 2016	0	0	1
64968|Marinospirillum	0	0	4
65115|environmental samples	0	0	1
65412|Togninia	0	0	1
655185|environmental samples	0	1	0
655776|unclassified Navicula	3	1	0
657|Photomonas	4	2	0
658121|Merotricha	0	0	1
661159|Schizoplasmodium	0	0	5
661161|Ceratiomyxella	0	0	1
662|Vibrio	50	39	7
663243|unclassified Variovorax	0	0	32
665874|Limnohabitans	0	0	3
6668|Daphniopsis	0	0	154
670167|environmental samples	0	0	1
670516|Mycobacteroides	130	0	6
671232|Streptococcus anginosus group	0	0	3
67475|Haslea	2	0	0
67575|Rheinheimera	0	0	2
67751|Pimpla	0	0	4
679429|Fusarium tricinctum species complex	0	0	2
682385|environmental samples	0	2	0
68287|Mesorhizobium	0	0	4
6836|Calanus	0	2	0
683666|unclassified Ocnerodrilidae	0	0	5
6851|Tachypleus	0	0	1
685691|Microneta	0	0	1
68745|Stropharia	0	0	4
6886|Tityus	0	0	1
6920|Loxosceles	0	0	1
69476|unclassified Planctomycetaceae	1	0	0
69720|Zantedeschia Spreng., 1826	0	0	2
697331|Basfia	0	1	0
700450|Siphonobacter Tancsics et al. 2010	0	0	12
700647|Desis Walckenaer, 1837	0	0	2
700701|Chresiona Simon, 1903	0	0	1
702|Plesiomonas	10	3	0
704140|unclassified Chromulinaceae	0	0	4
708224|Aptinoma	0	0	2
713|Actinobacillus	1	0	4
71323|Camelina	0	0	14
71655|Brenneria	4	5	0
717610|Vibrio harveyi group	28	38	0
71909|Pleurocybella Singer, 1947	0	0	7
72171|Zizyphus	0	0	1
724|Haemophilus Winslow et al. 1917	5	8	8
72537|Chironomus	0	0	2
72763|Tessaracoccus	0	0	1
730332|unclassified Entomobryomorpha	0	0	1
73579|Galloisiana	0	0	1
73872|environmental samples	0	1	0
74030|Roseovarius	0	0	6
7419|Diadromus	0	0	1
74202|environmental samples	0	1	2
745|Pasteurella Trevisan 1887 (Approved Lists 1980) emend. Mutters et al. 1985	9	1	0
745410|Gallaecimonas	0	1	0
75|Caulobacter	0	0	11
75365|Sinocyclocheilus	0	0	10
754015|environmental samples	0	0	1
75429|Thurnia	1	1	0
75661|environmental samples	141	0	15
75663|environmental samples	23	51	0
75671|environmental samples	0	0	1
75676|environmental samples	27	58	3
7571|Lingula	0	0	1
75924|environmental samples	3	0	0
759354|environmental samples	1	0	0
75984|Mannheimia	0	2	0
76016|Pandora	0	0	110
76125|Coriolopsis	0	0	2
764682|Trycherus	0	0	1
765820|environmental samples	0	0	15
7664|Strongylocentrotus	0	1	0
768111|unclassified Rhagidiidae	0	0	2
768136|Charinus	0	0	1
76890|Asticcacaulis	0	0	5
77118|environmental samples	0	0	12
77353|environmental samples	0	0	5
77643|Mycobacterium tuberculosis complex	0	1	12
77650|Simocephalus	0	0	25
77652|Scapholeberis	0	0	5
77661|Polyphemus	0	0	1
77671|Ceriodaphnia	0	0	11
77695|environmental samples	1	0	3
78156|Pseudogymnoascus	0	0	1
7840|Triakis	0	0	22
7901|Acipenser	0	0	2
79328|Chitinophaga	0	0	2
80744|Serpula	0	0	2
80820|Fragum	0	0	16
80841|unclassified Burkholderiales	0	0	6
80865|Delftia Wen et al. 1999	1	0	18
81|Hyphomicrobium Stutzer and Hartleb 1899 (sic)	0	0	2
81077|artificial sequences	12	15	9
8139|Oreochromis	0	0	4
81440|unclassified Caulobacter group	0	0	5
81490|unclassified prokaryotes	3	1	9
81525|Monosiga	0	0	2
816|Ristella	0	0	11
81684|unclassified Proteobacteria	1	0	3
82976|Buttiauxella	1	1	1
82980|Leminorella	2	1	0
82982|Obesumbacterium Shimwell 1963	1	2	0
82984|Pragia	2	6	0
82986|Tatumella	5	2	1
83173|Starmera Y. Yamada, Higashi, S. Ando & Mikata, 1997	0	1	0
83494|unclassified Comamonadaceae	0	0	7
83654|Leclercia Tamura et al. 1987	3	3	0
838|Xylanibacter Ueki et al. 2006	0	0	19
83889|unclassified Marinobacter	2	1	0
84086|unclassified Firmicutes	0	0	1
841|Roseburyella	0	0	24
84372|environmental samples	0	0	1
84396|Asplanchna	0	0	10
84406|Virgibacillus	0	0	1
84563|ant, tsetse, mealybug, aphid, etc. endosymbionts	1	2	0
84565|tsetse S-endosymbionts	48	42	0
84567|Pedobacter Steyn et al. 1998 emend. Zhou et al. 2012	0	0	6
846|Oxalobacter	0	0	2
84713|environmental samples	1	0	0
848|Fusobacterium	0	0	1
85024|unclassified Mycobacteriaceae	0	0	132
85108|Halorhodospira	0	1	0
85258|Rinorea	0	0	1
85413|Bosea Das et al. 1996 emend La Scola et al. 2003	0	0	7
85620|Phytoplasma asteris	0	0	1
860955|Scolebythus	0	0	3
86661|Bacillus cereus group	13	0	2
87003|Irvingbaileya	0	0	6
87270|Umbilicaria	0	0	1
8728|Crotalus	0	0	1
876695|Ophiocreas	0	0	1
87806|environmental samples	3	1	0
87828|environmental samples	0	0	1
87882|Burkholderia cepacia complex	60	67	177
880756|Fistulifera	1	0	0
88138|Modestobacter	0	0	7
88166|Poterioochromonas	0	0	86
88601|environmental samples	0	0	1
89043|Spumella	0	0	1
89290|environmental samples	0	0	2
89306|environmental samples	0	0	1
89443|unclassified Fungi	0	0	13
89521|unclassified Glomerales	0	0	1
89966|Taxeobacter	0	1	0
90316|unclassified Microbacteriaceae	0	0	1
906|Megasphaera	0	0	1
908989|unclassified Nitzschia	16	1	5
909656|Phocaeicola	0	0	3
909768|Acinetobacter calcoaceticus/baumannii complex	388	7	60
91378|Aspidosiphon	0	0	2
914|"Nitrosomonas" Winogradsky 1892 emend. Campbell et al. 2011	0	0	3
914216|Gordiodrilus	0	0	1
91493|Setosphaeria	0	0	2
91571|Parartemia	0	0	1
919|Thiobacillus	0	0	3
91994|unclassified Staphylococcus	0	1	40
92793|Aquabacterium	0	0	99
92862|unclassified Pleosporales	0	1	0
929812|Gibbsiella	4	0	0
93217|Pandoraea	2	1	408
93386|Pigeon herpesvirus	0	0	3
93660|unclassified Aeromonas group	0	1	0
93681|Roseateles Suyama et al. 1999 emend. Gomila et al. 2008	0	0	27
93682|Roseivivax Suzuki et al. 1999 emend. Park et al. 2010	0	0	2
93758|Corchorus	0	0	4
94032|Uloborus	0	0	1
946227|unclassified Idiomarinaceae	0	0	1
94674|Prionospio	0	0	1
94986|Hexanchus	0	0	6
95678|Rhagovelia	0	0	1
963|Herbispirillum	0	0	18
96312|Leptographium	0	0	1
96431|Scelotes	0	0	2
970|Selenomonas von Prowazek 1913	0	0	1
97938|environmental samples	0	0	3
97940|environmental samples	0	1	1
980970|Hexabathynella	0	0	2
98185|environmental samples	0	0	1
984452|Xenophyes	0	0	1
9903|oxen, cattle	0	0	64
99283|environmental samples	0	0	1
995085|Stenotrophomonas maltophilia group	1	1	6
99813|Sequoiadendron	0	0	1
