# Supplementary material for: Cancer type classification using plasma cell-free RNAs derived from human and microbes
Source: eLife. 2022 Jul 11;11:e75181. doi: 10.7554/eLife.75181 (PMC9273212; doi:10.7554/eLife.75181)
Supplement: Supplementary file 4. [file elife-75181-supp4.xlsx]

## Sheet: Reads Fraction
Fraction	genome	circRNA	microbe-rRNA-sortmerna	microbe-virus-bowtie2	virus-unmapped-homo-kraken2	virus-unmapped-microbe-kraken2	virus-unmapped-microbe-unclassified
CRC-2280766	8724427	114521	5223386	718	1147447	61794	422221
CRC-2327118	24570767	316147	216804	191	467004	21779	6788
CRC-2334660	9688459	110350	835059	163	815780	16018614	48291
CRC-2362297	28657686	460940	296401	482	653458	29020	28219
CRC-2372270	12465166	170532	442577	139	365770	42245	28362
CRC-2382513	10671024	254487	1111643	2642	743062	73680	120488
CRC-2383018	27671721	369771	1255315	870	549803	75729	102685
CRC-2383387	31796698	387696	1716286	460	741281	72988	193925
CRC-2383420	35063291	381523	1589259	1088	912602	102855	146781
CRC-2383555	11765635	111059	718543	790	483316	31233	65608
CRC-2383730	66686013	853960	4556725	1038	1718338	298840	250907
CRC-2384076	26133686	357316	307874	801	567270	29870	30234
CRC-2384108	27621110	471313	590073	1669	585120	154804	197499
CRC-2384226	32422502	475823	6576909	1186	1083268	311428	161988
CRC-2384272	21521111	414923	355334	388	521961	38360	26303
CRC-2384377	24777743	219956	3483258	1769	958593	167218	130784
CRC-2384422	37041406	274979	533769	815	884634	63780	63850
CRC-2384541	11219798	497531	2876011	12155	8339338	177065	459528
CRC-2384548	18001009	571808	6196864	1894	2547130	261391	523657
CRC-2384796	32062647	301710	838995	1161	854937	102964	102553
CRC-2386412	27120033	452011	7702054	2566	1968488	278939	562803
CRC-2386612	24895037	457072	3281341	513	656027	106132	93580
CRC-2387327	29736658	346099	4518073	839	790157	202385	120284
CRC-2388859	57020597	675717	4800553	753	1600117	400800	256358
CRC-2388932	41151463	668666	575707	438	1303585	52289	40187
CRC-2389212	10280725	523102	2299717	1531	6072364	222606	318873
CRC-2390502	50933832	823607	1064225	1122	1968716	167458	72185
CRC-2390716	29270132	182194	872899	981	1052852	73152	48224
CRC-2391097	27160630	480237	321013	371	838157	42834	18377
CRC-2393807	25873861	203604	3603236	868	605788	132738	98120
CRC-2396217	22469823	399300	3500936	496	507130	176287	97945
CRC-2396837	35338268	668432	634565	392	1087135	101259	42888
CRC-2397180	28590988	347379	3281485	1051	631460	206212	164843
CRC-2398897	15253804	114470	758486	637	1133523	153345	70320
CRC-2405108	14407924	218447	1082862	4394	539893	231446	254166
CRC-2406345	21027419	589867	621850	356456	1178815	15388347	1034350
CRC-2406552	23172202	521089	608390	395	1352187	11311413	55700
CRC-2407821	55740967	664962	369729	1819	1525168	43703	31128
CRC-2408137	25788212	510253	734978	858	1808308	14651581	65633
CRC-2408162	22680458	525409	621788	541	1255907	12300570	55140
CRC-2408206	42427602	876346	396454	237	1246547	117421	22817
CRC-2408346	33400289	777568	593489	213	1138167	206734	49508
CRC-2408784	32830882	529393	315535	935	1084531	3757341	25215
CRC-2410759	19452426	384112	575325	422	796887	66453	26157
CRC-2410966	23053699	533043	442549	322	1560701	102011	86145
CRC-2411883	46592817	635346	1043494	2670	1610127	205225	194931
CRC-2411896	83050391	621828	975772	10015	2735694	288827	292895
CRC-2412048	25178981	513206	348691	285	554844	36546	22350
CRC-2412066	20975054	281473	778712	626	677676	43201	53979
CRC-9299429	62472685	857675	6031321	1388	1783565	525290	374989
ESCA_KZ-17	13614808	228810	5765883	418	1989311	165452	159308
ESCA_PKU-2412110	27471482	395119	644787	670	825451	43691	32990
ESCA_PKU-2412347	26587910	277805	1800636	815	683221	71041	69952
ESCA_PKU-2412565	27625085	242227	1376882	1082	706154	61030	57306
ESCA_PKU-2412866	23173169	297763	649160	958	679928	59772	34206
ESCA_PKU-2414413	22741950	416886	4507213	1032	1614514	202345	141238
ESCA_PKU-2414433	29182366	368585	1805509	1117	1670445	91161	55676
ESCA_PKU-2414466	28707275	355840	2029030	1269	1116744	117195	98579
ESCA_PKU-2414682	24301852	250747	604430	622	738438	35929	34644
ESCA_PKU-2414854	26497887	261553	737098	1133	599772	36551	34697
ESCA_PKU-2415457	20297385	324639	1951392	1315	842064	116944	78054
ESCA_PKU-2415469	39526336	524689	10758295	2308	1661924	502013	396506
ESCA_PKU-2415974	27511943	369176	1751550	1014	801149	110632	84137
ESCA_PKU-2418551	29035427	324440	2533938	959	1017672	93912	87177
ESCA_PKU-2418615	27608361	246956	1752719	990	705760	88317	45385
ESCA_TJHH-569608	3506566	61713	16492450	1698	759639	433234	507830
ESCA_TJHH-569799	16091545	203388	3219349	4116	1948673	1367858	413508
ESCA_UnionH-1620241	29217566	399045	1524627	1860	1718942	272205	230483
ESCA_UnionH-1626151	29220186	372427	1474259	530	1894968	141502	156376
ESCA_UnionH-1628973	37487660	796513	984597	1149	1981285	124480	115973
ESCA_UnionH-1629817	31996639	505517	1649333	2348	1268461	418347	288079
ESCA_XieH-1630667	13459287	121362	1974030	867	1238739	183171	256078
ESCA_XieH-1630872	18962900	295071	675639	1092	715277	259539	123595
HCC-ChQ10	6115582	117223	11561779	5910	482810	1362373	1362327
HCC_ChQ-33630257	23663227	233532	2018238	1719	5455968	409540	313956
HCC_ChQ-7000014337	34957058	1352075	14224113	9971	9602722	1736421	1374480
HCC_ChQ-8002011290	21400585	472857	3019564	94002	5640647	1793916	1924742
HCC_ChQ-8002020781	32657137	690110	2522209	2026	6950849	198258	383822
HCC_ChQ-91244930	51822870	1692948	6548727	4127	6943620	690142	744141
HCC_ShH-214851	27427413	285848	6113343	3374	3436170	204818	277567
HCC_ShH-216070	28043571	215660	424584	735	2007021	201375	70769
HCC_ShH-216159	23660086	581517	326177	89	806948	147070	27485
HCC_ShH-216176	24214472	188691	425742	673	1859045	178594	62251
HCC_ShH-216180	13663001	361192	1611139	140	6646228	839163	158200
HCC_ShH-216222	27352216	229089	443687	2636	2360062	78582	47211
HCC_ShH-216224	23688150	164723	969464	532	4554788	113729	84144
HCC_ShH-216260	29128050	244641	430268	2546	2477670	79887	49716
HCC_ShH-216265	16583725	123693	12647937	813	1143317	617833	5533556
HCC_ShH-216276	28898537	200098	1038998	587	5398432	132869	100184
HCC_ShH-216287	26452667	581181	480950	927	2204374	58608	36975
HCC_ShH-216288	25884735	287309	2969245	1041	1055462	99601	100734
HCC_ShH-216290	22326646	175883	945201	717	3531798	55231	48223
HCC_ShH-216306	22512280	655793	440247	691	958450	95040	60627
HCC_ShH-216310	27539833	593217	398984	2036	1714293	168304	59035
HCC_ShH-216314	34418051	760880	600477	1093	2881500	72905	47975
HCC_ShH-216328	31479489	248853	980648	895	4499035	73181	66614
HCC_ShH-216336	25232017	436362	291390	210	936511	131515	36421
HCC_ShH-216368	30540212	412163	2731472	501	7391749	46002	99958
HCC_ShH-216372	22014267	447572	502528	255	982326	148145	36120
HCC_ShH-216383	27910225	221745	1082470	51739	1668693	231866	246106
HCC_ShH-216386	20981035	299070	522166	214	1210631	270575	100398
HCC_ShH-216387	30566613	667131	420016	2110	1875904	182931	53866
HCC_ShH-216390	27396318	300853	223137	248	1548995	37017	31345
HCC_ShH-216393	21302349	150135	605797	159	1017090	151787	83218
HCC_ShH-216398	29308525	378202	1037916	506	6737395	41956	85228
HCC_ShH-216435	30878429	348978	1626681	880	1234477	82217	557720
HCC_ShH-216447	30446055	177868	677463	2281	4354647	50342	89772
HCC_ShH-216450	30680720	112513	341366	377	2063100	22928	18105
HCC_ShH-216469	9037990	87887	607333	2456	760162	422155	207471
HCC_ShH-216517	24951262	256327	1274136	601	1568768	51709	53856
HCC_ShH-216540	21775218	382975	7675826	1388	1678435	217105	289677
HCC_ShH-216565	29169513	526458	357541	410	1826152	78362	49385
HCC_ShH-216652	27528441	583564	350736	235	1746438	62841	38542
HCC_ShH-216692	30144106	243387	334010	636	1950534	31415	26958
HCC_ShH-216730	34818672	654865	705226	1833	1898420	127100	136450
HCC_ShH-216733	33215880	187607	232613	1810	2051245	43563	42813
HCC_ShH-216749	30244259	372464	2119582	1010	1268720	102313	88701
HCC_ShHW-161444	23424994	263349	1495189	724	1572688	163101	193301
HCC-ShHW-223960	19514553	102110	1208647	932	3462137	97368	72733
HCC-ShHW-224900	18665845	301870	1365320	970	2054864	156517	171101
HCC-ShHW-224934	21777512	112938	534340	846	2494299	42847	137878
HCC_ShHW-224990	31329338	168054	620369	549	1709334	16095	22475
HCC-ShHW-224995	14038449	100973	1820596	1901	1380232	716585	406696
HCC_ShHW-225048	26523356	267521	1612843	1004	2905851	332692	346259
HCC_ShHW-225050	31403592	276665	1328078	485	3656532	42815	62191
HCC_ShHW-225181	18879159	267953	5723362	2749	4012385	2459510	1826505
HCC_ShHW-225315	32679436	59975	355032	1448	2421540	213099	208898
HCC-ShHW-225464	18426284	90732	225104	1263	1713351	85214	95304
HCC-ShHW-225484	17201788	43871	1079320	429	2265033	116260	378334
HCC-ShHW-351556	15134922	288151	3027612	1393	6356264	334225	389234
LUAD-2238350	58333887	688719	4119193	893	1401924	330094	217319
LUAD-2359535	17846297	202642	611552	1919	839141	57672	134018
LUAD-2359570	21131376	336482	2272591	2984	2253964	198632	271325
LUAD-2378877	30817536	311983	320691	548	989357	58771	35100
LUAD-2379000	29603800	496792	6346366	397	870358	412136	250531
LUAD-2379197	26854386	368546	6562222	1148	882205	305025	178632
LUAD-2379223	61834147	826303	5253184	670	1655764	328032	260746
LUAD-2379275	24902579	576115	223983	161	793174	123878	76846
LUAD-2380731	14546252	209237	13892705	1247	433216	201932	403907
LUAD-2380982	34860318	594715	221945	144	1094971	34475	17821
LUAD-2381001	27109991	389061	693717	555	1105682	205909	144934
LUAD-2381036	21502897	427724	934715	1086	2861913	125423	133143
LUAD-2381280	103822872	2843744	11580806	10511	4599701	1664640	3620663
LUAD-2381602	29326920	390236	1110385	687	2650980	104559	44249
LUAD-2381787	39688449	532616	900389	1036	2373983	1493179	373483
LUAD-2382152	30516647	443248	587509	391	1430331	1348382	175520
LUAD-2382186	25223677	489608	292379	362	1262444	73559	29940
LUAD-2382392	48168455	859784	2837646	1692	1822232	2041342	197539
LUAD-2382462	26367744	620233	235994	287	1232042	252762	29856
LUAD-2383484	26589224	328600	212014	113	636788	36707	9934
LUAD-2383900	19853647	251545	460468	5850	461594	48810	140006
LUAD-2384213	26082537	503818	588226	497	1343967	64793	41883
LUAD-2384220	28437872	20884	121037	1444	1760497	23420	26673
LUAD-2384340	28368833	338183	2835363	1097	805529	119265	100613
LUAD-2384356	28242512	426623	1908797	870	847549	105734	92350
LUAD-2384360	23850490	532869	227903	214	923194	55869	14624
LUAD-2386025	65805019	429451	8081194	2218	2901037	418948	304111
LUAD-2386185	23577429	224347	1466648	556	2064622	280002	175943
LUAD-2386375	15787882	309825	2750876	2346	1503319	298419	322770
LUAD-2386387	20721334	476840	184566	396	1468230	515639	30008
LUAD-2387760	18945099	439098	1665891	2487	3669259	365912	435458
LUAD-2388850	22073532	406351	842741	8269	686992	261842	432985
LUAD-2391958	25076970	270199	4810378	1402	858822	194355	201284
LUAD-2394433	26028727	384644	6808947	1547	913910	305114	246038
NC_ChQ-10	14301040	265010	1954769	1187	2466311	658180	392781
NC_ChQ-11	14295416	215688	2391541	1832	1207521	777503	483194
NC_ChQ-24	8029331	122487	6129035	23158	933697	1415343	1705098
NC_ChQ-26	7423878	993795	8393780	10778	2790292	447315	733950
NC_ChQ-35	5483460	129431	16947912	2766	264492	781095	771246
NC_ChQ-36	8777685	170412	8765380	6303	690765	1513362	1964277
NC_ChQ-51	15098428	341556	6319588	4685	2190443	1416436	1117641
NC_ChQ-52	19244345	171687	4767150	2235	1679654	1169165	917557
NC_ChQ-58	5342353	713389	3470628	7848	3930831	656347	208380
NC_ChQ-65	5807744	427864	10251853	3956	639043	756780	958714
NC_ChQ-70	8997813	149278	2942270	3139	1357591	2501897	1518239
NC_ChQ-71	13224242	249691	5204366	2044	1684894	1037677	904963
NC_HaiB-2	11177388	556186	5720728	1374	5502652	195934	261699
NC_HaiB-3	10872193	298581	4773972	2161	5517897	255790	260649
NC_PKU-2359973	26928732	673330	439148	457	974591	55014	36723
NC_PKU-2392860	33239711	374807	2833683	753	1045257	162757	88906
NC_PKU-2392931	32933120	697885	380857	708	1007672	49445	25856
NC_PKU-2392932	28472152	313684	2716725	1112	932985	188392	171231
NC_PKU-2392993	16302334	460917	659939	375	726448	62776	51986
NC_PKU-2394780	37218608	584186	7306674	1168	3210479	288893	394836
NC_PKU-2397512	15697906	160654	658029	1762	662780	62229	116510
NC_PKU-2397878	16992420	265315	2887854	974	780961	284825	151034
NC_PKU-2399728	18365274	202484	7682534	1494	937607	576501	372704
NC_PKU-28	16141112	418061	368673	156	531483	74399	41571
NC_PKU-33	20903755	478980	204399	440	560286	16134	11523
NC_PKU-34	30407186	634341	508035	267	1147884	29334	16549
NC_PKU-37	35689774	872942	1084161	485	1325436	116058	64457
NC_PKU-48	21001393	239062	6142105	2109	904116	321346	282106
NC_PKU-50	32731657	488153	680532	666	975852	56854	35532
NC_PKU-56	23622679	486276	559278	705	1044417	60396	14661
NC_PKU-69	26039869	728837	274545	396	928540	26758	21390
NC_PKU-8111237	14108713	211729	15696632	37084	826896	2735111	1048526
NC_ShH-14	16845077	143149	9362734	1483	1025187	726341	910017
NC_ShH-15	12642728	96705	23955723	1204	1020639	603665	1114484
NC_ShH-16	10628419	102959	5034517	2913	866706	765900	938584
NC_ShH-17	16522086	85433	5974832	3993	1245957	1105957	1432526
NC_ShH-1903250135	22516191	219610	8557217	1417	3215804	286911	300000
NC_ShH-1903250204	13791636	126590	9007347	1063	2210249	262361	363078
NC_ShH-1903250374	19737014	223482	1321146	660	1460638	159075	185355
NC_ShH-19	24851864	342328	1332082	1278	1933603	612408	413037
NC_ShH-1	14556493	274520	3107092	1813	2960578	1112918	811992
NC_ShH-20	7581482	111964	8656037	940	467445	595621	645460
NC_ShH-21	7160722	147834	5785741	2651	1169235	634594	816173
NC_ShH-22	3151227	63911	14800850	1543	480377	598740	2199959
NC_ShH-23	8616090	203350	5192276	1891	1018295	866688	740483
NC_ShH-24	11381880	251243	7256293	3607	628982	776781	905342
NC_ShH-27	13655244	80220	15549080	1899	1359984	747356	1702056
NC_ShH-28	7776647	141746	6203814	1828	448374	656141	1000743
NC_ShH-2	13087654	252802	2456801	1499	5161177	619631	427775
NC_ShH-31	16798813	175210	5196637	2321	1459949	1571026	1180901
NC_ShH-32	21248008	332233	2001141	893	1848728	519473	877747
NC_ShH-33	18972883	144520	11126916	904	1964928	1734060	1241854
NC_ShH-34	10394581	125582	20695455	2523	1976761	1606749	1024264
NC_ShH-37	11644220	72798	11583232	3112	662937	845203	1171074
NC_ShH-38	9807647	57735	4604972	3113	989198	461161	455143
NC_ShH-3	17387512	312348	2675248	2103	4194378	578981	743226
NC_ShH-42	5958356	148779	4669998	6529	1471331	1142699	1178781
NC_ShH-43	6157254	151154	6054932	4728	1593740	1416430	1636668
NC_ShH-4	9204066	133661	2885610	2148	1035895	993494	626677
NC_ShH-5	12125161	258549	2977523	1528	2383069	654474	482852
NC_ShH-6	8449414	97530	1366799	568	816965	812634	584125
NC_ShH-7	21736395	341260	1030566	764	1604718	555026	335453
NC_ShH-9	15920908	288232	3338514	2256	1683171	1145286	882594
STAD-2121836	28562663	374679	2231533	2815	3018815	253148	247156
STAD-2163710	40651716	911118	1169617	1240	2347081	168986	67109
STAD-2244628	46072730	1481408	2382762	2420	5321708	407304	143328
STAD-2374161	21940620	253072	536512	3757	519978	49616	89964
STAD-2380893	30346723	371650	396778	529	1096981	138779	80969
STAD-2381588	42758134	738393	510358	439	1433355	36641	41517
STAD-2382676	26358689	456301	2215097	526	2998256	120311	529148
STAD-2382823	29771458	662514	363590	192	692938	32365	29359
STAD-2383295	26010299	482002	1023070	1788	2976311	111855	113936
STAD-2383652	28096788	678394	642109	1613	1775320	76054	60227
STAD-2383723	23115662	303945	144906	1338	467634	20915	13994
STAD-2384103	27809851	479510	1682644	1397	1141508	205887	197324
STAD-2384513	26995898	563488	1504637	881	1436316	413407	377163
STAD-2386653	35493728	736900	343637	251	1030273	105042	84937
STAD-2387639	24509366	325175	375562	478	606361	42590	32313
STAD-2387809	32678552	557161	635727	642	1167515	124459	106630
STAD-2390003	39820379	721174	695279	1365	909238	95460	90348
STAD-2391832	35964853	424503	732054	1002	998118	94798	81884
STAD-2393829	29337697	400962	3275418	909	803072	139257	102488
STAD-2393878	30128553	474516	983351	1024	1270176	131115	146687
STAD-2394727	29992752	636880	1700448	641	1008784	158083	150327
STAD-2396557	26854355	422091	666400	972	1033301	68265	64770
STAD-2402396	31734684	357522	528274	1440	1237728	44439	39973
STAD-2406523	35072309	211518	464287	1370	1027242	54861	59551
STAD-2406754	27413850	361780	1293440	5200	2747572	149109	186592
STAD-2411921	36951903	342322	433799	878	867322	36433	34267
STAD-2412284	23009958	274750	1186204	7609	1142273	81482	115290
STAD-2412938	35042207	375902	1122211	3539	1901007	148729	80984
STAD-2412941	30912192	292953	547197	766	956181	48996	27617
STAD-2414108	16384189	237196	476981	7511	299824	45354	41712
STAD-2414120	31556296	291861	1108016	2074	1005799	138497	137616
STAD-2414426	24846392	309062	960934	1889	1411418	68004	60351
STAD-2414774	25870703	293559	1762967	3548	3440969	274087	415703
STAD-2415291	38509219	474420	444259	814	1248530	47208	35053
STAD-2416091	33440932	508563	605334	872	985065	67008	50852
STAD-2416272	20027049	256672	1038827	4892	1223203	141826	141214
