# Supplementary material for: Cancer type classification using plasma cell-free RNAs derived from human and microbes
Source: eLife. 2022 Jul 11;11:e75181. doi: 10.7554/eLife.75181 (PMC9273212; doi:10.7554/eLife.75181)
Supplement: Supplementary file 5. [file elife-75181-supp5.xlsx]

## Sheet: human cancer vs. HD
gene id	logFC	logCPM	F	PValue	FDR
ENSG00000000419.12|mRNA|DPM1|ENSG00000000419.12|ENSG00000000419.12|0|1207	-0.54717	4.30046	23.7142	1.88601e-06	5.76411e-06
ENSG00000000457.13|mRNA|SCYL3|ENSG00000000457.13|ENSG00000000457.13|0|6883	-0.193302	3.57528	1.46857	0.22661	0.265495
ENSG00000000460.16|mRNA|C1orf112|ENSG00000000460.16|ENSG00000000460.16|0|5967	0.943465	5.05732	32.4675	3.10996e-08	1.31388e-07
ENSG00000000938.12|mRNA|FGR|ENSG00000000938.12|ENSG00000000938.12|0|3474	-1.12796	6.20729	62.9616	5.32986e-14	9.73537e-13
ENSG00000000971.15|mRNA|CFH|ENSG00000000971.15|ENSG00000000971.15|0|8145	2.60279	5.67321	26.2631	5.61344e-07	1.89026e-06
ENSG00000001036.13|mRNA|FUCA2|ENSG00000001036.13|ENSG00000001036.13|0|2793	0.685973	3.91268	22.3189	3.68451e-06	1.07031e-05
ENSG00000001084.10|mRNA|GCLC|ENSG00000001084.10|ENSG00000001084.10|0|8463	-0.928917	4.28673	37.1738	3.6376e-09	1.84799e-08
ENSG00000001167.14|mRNA|NFYA|ENSG00000001167.14|ENSG00000001167.14|0|3811	-0.339154	4.0202	6.59721	0.010741	0.0162516
ENSG00000001460.17|mRNA|STPG1|ENSG00000001460.17|ENSG00000001460.17|0|8511	0.320628	2.24494	3.15501	0.0767974	0.0987191
ENSG00000001461.16|mRNA|NIPAL3|ENSG00000001461.16|ENSG00000001461.16|0|9404	1.00972	4.54087	43.5168	2.14277e-10	1.42221e-09
ENSG00000001497.16|mRNA|LAS1L|ENSG00000001497.16|ENSG00000001497.16|0|5589	-1.01165	4.56444	37.6653	2.91388e-09	1.50836e-08
ENSG00000001561.6|mRNA|ENPP4|ENSG00000001561.6|ENSG00000001561.6|0|4651	0.688611	2.06966	10.5378	0.00131412	0.00237777
ENSG00000001629.9|mRNA|ANKIB1|ENSG00000001629.9|ENSG00000001629.9|0|7130	0.310852	6.32028	9.60775	0.00213817	0.0037019
ENSG00000001630.15|mRNA|CYP51A1|ENSG00000001630.15|ENSG00000001630.15|0|4074	-0.206636	2.93299	1.78524	0.2085	0.246329
ENSG00000001631.15|mRNA|KRIT1|ENSG00000001631.15|ENSG00000001631.15|0|6204	0.524568	6.94258	31.5184	4.81746e-08	1.96451e-07
ENSG00000002016.17|mRNA|RAD52|ENSG00000002016.17|ENSG00000002016.17|0|4190	-0.256475	1.98667	1.50543	0.220885	0.259394
ENSG00000002330.13|mRNA|BAD|ENSG00000002330.13|ENSG00000002330.13|0|1708	0.66542	4.60394	27.3102	3.42606e-07	1.20008e-06
ENSG00000002549.12|mRNA|LAP3|ENSG00000002549.12|ENSG00000002549.12|0|3785	-0.770881	5.98259	42.2705	3.71834e-10	2.33803e-09
ENSG00000002586.18|mRNA|CD99|ENSG00000002586.18|ENSG00000002586.18|0|3284	1.53746	9.45661	71.1512	1.88686e-15	5.06505e-14
ENSG00000002822.15|mRNA|MAD1L1|ENSG00000002822.15|ENSG00000002822.15|0|7230	-0.314496	5.3104	5.32306	0.0217865	0.0310601
ENSG00000002834.17|mRNA|LASP1|ENSG00000002834.17|ENSG00000002834.17|0|7061	0.0912312	7.56052	1.52815	0.217443	0.255653
ENSG00000002919.14|mRNA|SNX11|ENSG00000002919.14|ENSG00000002919.14|0|3606	-0.52965	3.82195	22.3898	3.56082e-06	1.03619e-05
ENSG00000003056.7|mRNA|M6PR|ENSG00000003056.7|ENSG00000003056.7|0|3777	0.670665	5.79841	36.1726	5.7231e-09	2.79684e-08
ENSG00000003096.14|mRNA|KLHL13|ENSG00000003096.14|ENSG00000003096.14|0|6983	0.86444	2.43227	21.9655	4.36881e-06	1.25466e-05
ENSG00000003147.17|mRNA|ICA1|ENSG00000003147.17|ENSG00000003147.17|0|4891	0.786039	6.28726	39.7926	1.1208e-09	6.28993e-09
ENSG00000003393.14|mRNA|ALS2|ENSG00000003393.14|ENSG00000003393.14|0|10384	-0.164527	3.62937	1.56667	0.211753	0.24967
ENSG00000003400.14|mRNA|CASP10|ENSG00000003400.14|ENSG00000003400.14|0|7598	-0.849889	3.33447	24.0401	1.61397e-06	4.98847e-06
ENSG00000003402.19|mRNA|CFLAR|ENSG00000003402.19|ENSG00000003402.19|0|22529	-0.226507	7.77165	11.656	0.000736179	0.00139242
ENSG00000003436.15|mRNA|TFPI|ENSG00000003436.15|ENSG00000003436.15|0|11714	1.66075	8.60235	60.1711	1.69725e-13	2.7038e-12
ENSG00000003509.15|mRNA|NDUFAF7|ENSG00000003509.15|ENSG00000003509.15|0|3651	-0.637044	2.57091	12.3582	0.000513149	0.00100125
ENSG00000003756.16|mRNA|RBM5|ENSG00000003756.16|ENSG00000003756.16|0|10368	0.0894324	7.49012	1.27994	0.258894	0.299013
ENSG00000004059.10|mRNA|ARF5|ENSG00000004059.10|ENSG00000004059.10|0|1871	0.421006	6.12068	16.0841	7.80896e-05	0.000178081
ENSG00000004142.11|mRNA|POLDIP2|ENSG00000004142.11|ENSG00000004142.11|0|2121	-0.965704	4.10768	62.9614	5.33017e-14	9.73537e-13
ENSG00000004399.12|mRNA|PLXND1|ENSG00000004399.12|ENSG00000004399.12|0|9738	-0.52246	4.24352	7.89837	0.00530269	0.00850109
ENSG00000004455.16|mRNA|AK2|ENSG00000004455.16|ENSG00000004455.16|0|5727	-0.952543	4.77822	64.1244	3.29919e-14	6.36386e-13
ENSG00000004468.12|mRNA|CD38|ENSG00000004468.12|ENSG00000004468.12|0|6855	-0.263952	2.68529	1.57791	0.210125	0.247971
ENSG00000004478.7|mRNA|FKBP4|ENSG00000004478.7|ENSG00000004478.7|0|5180	-1.12322	4.85904	63.3509	4.5383e-14	8.46739e-13
ENSG00000004487.15|mRNA|KDM1A|ENSG00000004487.15|ENSG00000004487.15|0|5435	0.313031	7.34411	11.852	0.00066548	0.00127099
ENSG00000004534.14|mRNA|RBM6|ENSG00000004534.14|ENSG00000004534.14|0|7302	0.0379913	7.48592	0.14625	0.70244	0.737804
ENSG00000004660.14|mRNA|CAMKK1|ENSG00000004660.14|ENSG00000004660.14|0|7424	-0.0462316	2.43094	0.0621404	0.80333	0.830651
ENSG00000004700.15|mRNA|RECQL|ENSG00000004700.15|ENSG00000004700.15|0|3778	0.0421545	6.08794	0.231248	0.630982	0.670588
ENSG00000004766.15|mRNA|VPS50|ENSG00000004766.15|ENSG00000004766.15|0|9454	-0.0398351	5.43686	0.215205	0.643084	0.681525
ENSG00000004779.9|mRNA|NDUFAB1|ENSG00000004779.9|ENSG00000004779.9|0|1600	-1.23468	4.75944	82.4489	2.15171e-17	9.75359e-16
ENSG00000004799.7|mRNA|PDK4|ENSG00000004799.7|ENSG00000004799.7|0|4519	-0.798147	4.52698	24.8459	1.09925e-06	3.5096e-06
ENSG00000004864.13|mRNA|SLC25A13|ENSG00000004864.13|ENSG00000004864.13|0|3710	-0.0314536	3.70443	0.0571654	0.811211	0.837671
ENSG00000004866.20|mRNA|ST7|ENSG00000004866.20|ENSG00000004866.20|0|6742	1.18884	6.79587	42.0958	4.01778e-10	2.51285e-09
ENSG00000004897.11|mRNA|CDC27|ENSG00000004897.11|ENSG00000004897.11|0|6824	0.531699	7.75677	20.5463	8.68588e-06	2.36022e-05
ENSG00000004939.13|mRNA|SLC4A1|ENSG00000004939.13|ENSG00000004939.13|0|5287	-1.3793	7.8388	43.9932	1.73687e-10	1.17636e-09
ENSG00000004961.14|mRNA|HCCS|ENSG00000004961.14|ENSG00000004961.14|0|2335	-1.14933	3.80392	60.0765	1.76561e-13	2.79042e-12
ENSG00000004975.11|mRNA|DVL2|ENSG00000004975.11|ENSG00000004975.11|0|5350	-1.09945	2.43333	31.6523	4.52864e-08	1.85584e-07
ENSG00000005007.12|mRNA|UPF1|ENSG00000005007.12|ENSG00000005007.12|0|8600	0.0640794	5.80763	0.383014	0.536506	0.580167
ENSG00000005020.12|mRNA|SKAP2|ENSG00000005020.12|ENSG00000005020.12|0|5520	1.4019	9.90988	63.5397	4.19807e-14	7.91404e-13
ENSG00000005022.5|mRNA|SLC25A5|ENSG00000005022.5|ENSG00000005022.5|0|1500	-0.701607	5.80587	75.7918	2.94896e-16	9.70578e-15
ENSG00000005059.15|mRNA|MCUB|ENSG00000005059.15|ENSG00000005059.15|0|3566	-1.22056	4.53691	75.0612	3.94296e-16	1.23846e-14
ENSG00000005075.15|mRNA|POLR2J|ENSG00000005075.15|ENSG00000005075.15|0|1355	-0.338463	7.20853	15.348	0.00011283	0.000250184
ENSG00000005100.12|mRNA|DHX33|ENSG00000005100.12|ENSG00000005100.12|0|5872	0.348508	3.82244	6.13345	0.0138653	0.0205167
ENSG00000005156.11|mRNA|LIG3|ENSG00000005156.11|ENSG00000005156.11|0|12919	-0.468375	3.70739	6.46728	0.0115349	0.0173424
ENSG00000005175.9|mRNA|RPAP3|ENSG00000005175.9|ENSG00000005175.9|0|5381	0.398636	6.9141	14.6955	0.000156595	0.000338678
ENSG00000005187.11|mRNA|ACSM3|ENSG00000005187.11|ENSG00000005187.11|0|7822	0.357566	3.44777	3.95321	0.0477713	0.0638991
ENSG00000005189.19|mRNA|REXO5|ENSG00000005189.19|ENSG00000005189.19|0|4114	1.00946	3.73879	34.5366	1.20472e-08	5.51232e-08
ENSG00000005194.14|mRNA|CIAPIN1|ENSG00000005194.14|ENSG00000005194.14|0|3509	-0.543828	3.55484	15.166	0.000123617	0.000272074
ENSG00000005206.16|mRNA|SPPL2B|ENSG00000005206.16|ENSG00000005206.16|0|7130	0.845694	2.25424	11.5674	0.000770613	0.00145177
ENSG00000005238.19|mRNA|FAM214B|ENSG00000005238.19|ENSG00000005238.19|0|6409	-0.0612663	4.20883	0.242897	0.622514	0.662507
ENSG00000005243.9|mRNA|COPZ2|ENSG00000005243.9|ENSG00000005243.9|0|1851	-0.892886	2.30825	24.3976	1.36088e-06	4.27243e-06
ENSG00000005249.12|mRNA|PRKAR2B|ENSG00000005249.12|ENSG00000005249.12|0|4318	1.53446	11.4056	51.4962	6.65572e-12	6.5717e-11
ENSG00000005302.17|mRNA|MSL3|ENSG00000005302.17|ENSG00000005302.17|0|6496	-0.755697	5.61728	52.3439	4.62855e-12	4.79317e-11
ENSG00000005339.14|mRNA|CREBBP|ENSG00000005339.14|ENSG00000005339.14|0|15492	-0.0900049	7.21712	0.892206	0.345708	0.389182
ENSG00000005379.15|mRNA|TSPOAP1|ENSG00000005379.15|ENSG00000005379.15|0|11354	-0.679363	2.79602	9.17989	0.00267924	0.00455601
ENSG00000005381.7|mRNA|MPO|ENSG00000005381.7|ENSG00000005381.7|0|3526	-1.47925	2.84052	42.3569	3.57863e-10	2.25516e-09
ENSG00000005436.13|mRNA|GCFC2|ENSG00000005436.13|ENSG00000005436.13|0|5465	-0.754427	4.48232	45.4317	9.23163e-11	6.71009e-10
ENSG00000005448.16|mRNA|WDR54|ENSG00000005448.16|ENSG00000005448.16|0|2860	-1.51576	1.83928	50.3589	1.08533e-11	1.00543e-10
ENSG00000005469.11|mRNA|CROT|ENSG00000005469.11|ENSG00000005469.11|0|4979	-0.0151094	3.07248	0.0108383	0.951672	0.96136
ENSG00000005471.15|mRNA|ABCB4|ENSG00000005471.15|ENSG00000005471.15|0|7494	0.449242	3.71134	1.4421	0.230831	0.269851
ENSG00000005483.20|mRNA|KMT2E|ENSG00000005483.20|ENSG00000005483.20|0|9231	0.371538	8.54492	16.6301	5.95017e-05	0.000138819
ENSG00000005486.16|mRNA|RHBDD2|ENSG00000005486.16|ENSG00000005486.16|0|2441	0.0404884	3.60262	0.0833053	0.89008	0.908714
ENSG00000005700.14|mRNA|IBTK|ENSG00000005700.14|ENSG00000005700.14|0|8722	-0.0522569	5.40188	0.315569	0.574739	0.616731
ENSG00000005801.16|mRNA|ZNF195|ENSG00000005801.16|ENSG00000005801.16|0|5709	-1.11281	2.2382	28.577	1.89107e-07	6.9257e-07
ENSG00000005810.17|mRNA|MYCBP2|ENSG00000005810.17|ENSG00000005810.17|0|15945	0.555498	8.33892	33.3856	2.03974e-08	8.9021e-08
ENSG00000005812.10|mRNA|FBXL3|ENSG00000005812.10|ENSG00000005812.10|0|7082	0.000376242	6.02414	1.80004e-05	0.996618	0.997326
ENSG00000005844.17|mRNA|ITGAL|ENSG00000005844.17|ENSG00000005844.17|0|6472	-0.733438	6.21823	19.4239	1.50123e-05	3.9186e-05
ENSG00000005882.11|mRNA|PDK2|ENSG00000005882.11|ENSG00000005882.11|0|5481	0.461346	4.61214	13.1416	0.000343922	0.000695693
ENSG00000005889.15|mRNA|ZFX|ENSG00000005889.15|ENSG00000005889.15|0|9037	-0.78512	4.64075	49.8736	1.33789e-11	1.20853e-10
ENSG00000005893.15|mRNA|LAMP2|ENSG00000005893.15|ENSG00000005893.15|0|5526	1.19228	5.76788	55.8158	1.05689e-12	1.30524e-11
ENSG00000005961.17|mRNA|ITGA2B|ENSG00000005961.17|ENSG00000005961.17|0|5551	1.76071	11.2577	47.3899	3.92521e-11	3.11906e-10
ENSG00000006007.11|mRNA|GDE1|ENSG00000006007.11|ENSG00000006007.11|0|4416	0.791802	5.85652	34.965	9.9092e-09	4.60804e-08
ENSG00000006015.17|mRNA|C19orf60|ENSG00000006015.17|ENSG00000006015.17|0|3370	-0.601665	3.24007	11.7403	0.000704876	0.00133867
ENSG00000006025.11|mRNA|OSBPL7|ENSG00000006025.11|ENSG00000006025.11|0|6572	-0.275267	2.31147	1.23464	0.267475	0.308137
ENSG00000006062.14|mRNA|MAP3K14|ENSG00000006062.14|ENSG00000006062.14|0|5852	-0.706357	4.46303	14.6892	0.000157093	0.000339608
ENSG00000006125.17|mRNA|AP2B1|ENSG00000006125.17|ENSG00000006125.17|0|7587	0.728558	8.09064	42.6058	3.20516e-10	2.03849e-09
ENSG00000006194.9|mRNA|ZNF263|ENSG00000006194.9|ENSG00000006194.9|0|6945	-0.975335	1.87841	16.9493	5.07794e-05	0.000120156
ENSG00000006282.20|mRNA|SPATA20|ENSG00000006282.20|ENSG00000006282.20|0|5337	-0.760733	2.60702	12.9718	0.000375004	0.000753142
ENSG00000006451.7|mRNA|RALA|ENSG00000006451.7|ENSG00000006451.7|0|3665	-0.953873	5.2244	70.078	2.90917e-15	7.51599e-14
ENSG00000006459.10|mRNA|KDM7A|ENSG00000006459.10|ENSG00000006459.10|0|9430	0.167148	6.60122	2.94037	0.0875153	0.111178
ENSG00000006530.15|mRNA|AGK|ENSG00000006530.15|ENSG00000006530.15|0|6547	-0.974873	3.8761	60.3262	1.59099e-13	2.55699e-12
ENSG00000006534.15|mRNA|ALDH3B1|ENSG00000006534.15|ENSG00000006534.15|0|6626	-1.16195	3.79558	50.068	1.23027e-11	1.12198e-10
ENSG00000006576.16|mRNA|PHTF2|ENSG00000006576.16|ENSG00000006576.16|0|8646	1.13736	6.91312	51.6483	6.23538e-12	6.19556e-11
ENSG00000006607.13|mRNA|FARP2|ENSG00000006607.13|ENSG00000006607.13|0|14413	0.186538	5.33207	3.53541	0.0611262	0.0800552
ENSG00000006625.17|mRNA|GGCT|ENSG00000006625.17|ENSG00000006625.17|0|1597	-1.07977	2.90685	42.9822	2.71342e-10	1.75598e-09
ENSG00000006634.7|mRNA|DBF4|ENSG00000006634.7|ENSG00000006634.7|0|4583	-0.204073	4.66913	4.64219	0.0320619	0.0442727
ENSG00000006638.11|mRNA|TBXA2R|ENSG00000006638.11|ENSG00000006638.11|0|2793	1.23955	4.07534	37.932	2.58382e-09	1.35225e-08
ENSG00000006652.13|mRNA|IFRD1|ENSG00000006652.13|ENSG00000006652.13|0|7489	1.30059	7.66267	49.788	1.38826e-11	1.24837e-10
ENSG00000006695.10|mRNA|COX10|ENSG00000006695.10|ENSG00000006695.10|0|3172	-0.553093	2.6451	9.78361	0.00194943	0.00340021
ENSG00000006712.14|mRNA|PAF1|ENSG00000006712.14|ENSG00000006712.14|0|2668	-0.924774	5.93328	75.2233	3.69667e-16	1.18157e-14
ENSG00000006715.15|mRNA|VPS41|ENSG00000006715.15|ENSG00000006715.15|0|7801	0.8639	7.79437	50.5164	1.01415e-11	9.49187e-11
ENSG00000006744.18|mRNA|ELAC2|ENSG00000006744.18|ENSG00000006744.18|0|6345	-0.689557	3.92928	20.1741	1.04102e-05	2.78961e-05
ENSG00000006756.15|mRNA|ARSD|ENSG00000006756.15|ENSG00000006756.15|0|7030	0.365493	1.71295	1.91868	0.167122	0.20115
ENSG00000006757.11|mRNA|PNPLA4|ENSG00000006757.11|ENSG00000006757.11|0|3441	-1.28995	2.00184	36.3188	5.35586e-09	2.63175e-08
ENSG00000006831.9|mRNA|ADIPOR2|ENSG00000006831.9|ENSG00000006831.9|0|5878	0.957047	5.7216	54.2077	2.09021e-12	2.36602e-11
ENSG00000006837.11|mRNA|CDKL3|ENSG00000006837.11|ENSG00000006837.11|0|3057	1.02986	3.684	33.0647	2.36337e-08	1.02118e-07
ENSG00000007001.12|mRNA|UPP2|ENSG00000007001.12|ENSG00000007001.12|0|2957	1.22314	2.03131	24.5045	1.29322e-06	4.07607e-06
ENSG00000007047.14|mRNA|MARK4|ENSG00000007047.14|ENSG00000007047.14|0|6668	-0.265326	5.1603	8.06579	0.0048471	0.00781658
ENSG00000007080.10|mRNA|CCDC124|ENSG00000007080.10|ENSG00000007080.10|0|1660	-1.14058	4.79679	66.0478	1.49813e-14	3.18893e-13
ENSG00000007129.17|mRNA|CEACAM21|ENSG00000007129.17|ENSG00000007129.17|0|1964	-0.675887	3.80708	19.4583	1.47616e-05	3.85567e-05
ENSG00000007168.12|mRNA|PAFAH1B1|ENSG00000007168.12|ENSG00000007168.12|0|8127	0.171545	5.85965	3.07917	0.0804123	0.102869
ENSG00000007202.14|mRNA|KIAA0100|ENSG00000007202.14|ENSG00000007202.14|0|9235	0.115886	5.81728	0.434192	0.510489	0.554348
ENSG00000007237.18|mRNA|GAS7|ENSG00000007237.18|ENSG00000007237.18|0|10100	-1.04237	4.81074	49.1039	1.86576e-11	1.61583e-10
ENSG00000007255.10|mRNA|TRAPPC6A|ENSG00000007255.10|ENSG00000007255.10|0|933	-1.31978	2.53995	54.5638	1.79672e-12	2.07863e-11
ENSG00000007264.14|mRNA|MATK|ENSG00000007264.14|ENSG00000007264.14|0|4141	-1.27253	4.47166	63.9648	3.52335e-14	6.73114e-13
ENSG00000007312.12|mRNA|CD79B|ENSG00000007312.12|ENSG00000007312.12|0|2080	-1.55072	2.88549	67.8238	7.25751e-15	1.69102e-13
ENSG00000007341.18|mRNA|ST7L|ENSG00000007341.18|ENSG00000007341.18|0|8111	1.02651	6.38225	42.3993	3.5121e-10	2.21603e-09
ENSG00000007350.16|mRNA|TKTL1|ENSG00000007350.16|ENSG00000007350.16|0|3650	-1.22067	2.04289	29.2013	1.41264e-07	5.28912e-07
ENSG00000007376.7|mRNA|RPUSD1|ENSG00000007376.7|ENSG00000007376.7|0|2769	-0.973202	1.84958	23.7581	1.8468e-06	5.65466e-06
ENSG00000007392.16|mRNA|LUC7L|ENSG00000007392.16|ENSG00000007392.16|0|6176	0.0409087	4.63051	0.097692	0.754854	0.786684
ENSG00000007520.3|mRNA|TSR3|ENSG00000007520.3|ENSG00000007520.3|0|1243	-0.873551	4.20663	44.2568	1.54656e-10	1.06219e-09
ENSG00000007541.16|mRNA|PIGQ|ENSG00000007541.16|ENSG00000007541.16|0|7904	-0.756446	2.06805	11.1459	0.000958218	0.00177601
ENSG00000007545.15|mRNA|CRAMP1|ENSG00000007545.15|ENSG00000007545.15|0|8373	-0.176797	3.6189	1.52925	0.217278	0.255485
ENSG00000007923.15|mRNA|DNAJC11|ENSG00000007923.15|ENSG00000007923.15|0|5083	-0.662635	4.52508	21.7374	4.8773e-06	1.38968e-05
ENSG00000007944.14|mRNA|MYLIP|ENSG00000007944.14|ENSG00000007944.14|0|3033	-0.827658	3.5012	36.59	4.73666e-09	2.34948e-08
ENSG00000007968.6|mRNA|E2F2|ENSG00000007968.6|ENSG00000007968.6|0|5457	-1.28955	3.25572	41.9	4.3825e-10	2.71044e-09
ENSG00000008018.8|mRNA|PSMB1|ENSG00000008018.8|ENSG00000008018.8|0|2256	-0.698792	5.44591	61.407	1.01484e-13	1.72402e-12
ENSG00000008083.13|mRNA|JARID2|ENSG00000008083.13|ENSG00000008083.13|0|6015	1.13245	8.20037	53.626	2.67738e-12	2.93087e-11
ENSG00000008086.11|mRNA|CDKL5|ENSG00000008086.11|ENSG00000008086.11|0|17075	0.330435	3.59227	6.08683	0.0142276	0.0210069
ENSG00000008128.22|mRNA|CDK11A|ENSG00000008128.22|ENSG00000008128.22|0|4701	-0.345455	6.63673	9.87588	0.0018573	0.00325284
ENSG00000008130.15|mRNA|NADK|ENSG00000008130.15|ENSG00000008130.15|0|5570	-0.825037	5.72162	34.1321	1.44925e-08	6.519e-08
ENSG00000008256.15|mRNA|CYTH3|ENSG00000008256.15|ENSG00000008256.15|0|5808	-0.439034	3.33635	7.76913	0.00568427	0.00906277
ENSG00000008277.14|mRNA|ADAM22|ENSG00000008277.14|ENSG00000008277.14|0|12199	0.897635	5.28636	27.2891	3.46037e-07	1.21125e-06
ENSG00000008282.8|mRNA|SYPL1|ENSG00000008282.8|ENSG00000008282.8|0|2804	0.139461	3.74853	1.18585	0.277121	0.318257
ENSG00000008294.20|mRNA|SPAG9|ENSG00000008294.20|ENSG00000008294.20|0|11963	-0.0902129	6.47431	1.28464	0.258024	0.298111
ENSG00000008311.14|mRNA|AASS|ENSG00000008311.14|ENSG00000008311.14|0|4591	0.360878	2.21815	3.01775	0.0834751	0.106486
ENSG00000008324.11|mRNA|SS18L2|ENSG00000008324.11|ENSG00000008324.11|0|1298	-1.30536	3.00949	57.1832	5.9353e-13	7.86307e-12
ENSG00000008382.15|mRNA|MPND|ENSG00000008382.15|ENSG00000008382.15|0|2049	-0.980958	4.29653	52.9199	3.61846e-12	3.84052e-11
ENSG00000008394.12|mRNA|MGST1|ENSG00000008394.12|ENSG00000008394.12|0|7440	0.025217	2.59002	0.0107761	0.917397	0.932214
ENSG00000008405.11|mRNA|CRY1|ENSG00000008405.11|ENSG00000008405.11|0|5062	-0.23	3.33201	2.50972	0.114293	0.142029
ENSG00000008438.4|mRNA|PGLYRP1|ENSG00000008438.4|ENSG00000008438.4|0|720	-1.79345	2.68892	50.7737	9.07832e-12	8.63046e-11
ENSG00000008441.16|mRNA|NFIX|ENSG00000008441.16|ENSG00000008441.16|0|6302	-1.22379	5.22554	47.8141	3.264e-11	2.65283e-10
ENSG00000008513.14|mRNA|ST3GAL1|ENSG00000008513.14|ENSG00000008513.14|0|8729	0.0506257	4.16871	0.166143	0.683879	0.720396
ENSG00000008516.16|mRNA|MMP25|ENSG00000008516.16|ENSG00000008516.16|0|4126	-0.528779	2.49448	4.35203	0.0378844	0.0516123
ENSG00000008517.16|mRNA|IL32|ENSG00000008517.16|ENSG00000008517.16|0|3209	-1.29169	6.14809	83.9622	1.19518e-17	5.70284e-16
ENSG00000008710.19|mRNA|PKD1|ENSG00000008710.19|ENSG00000008710.19|0|18532	0.638253	2.77177	5.05349	0.0253672	0.0356755
ENSG00000008838.19|mRNA|MED24|ENSG00000008838.19|ENSG00000008838.19|0|6962	-0.694466	4.40267	31.6772	4.47681e-08	1.83649e-07
ENSG00000008853.16|mRNA|RHOBTB2|ENSG00000008853.16|ENSG00000008853.16|0|6580	-1.04045	3.1488	40.6493	7.64471e-10	4.46744e-09
ENSG00000008869.11|mRNA|HEATR5B|ENSG00000008869.11|ENSG00000008869.11|0|8206	0.176703	5.73775	2.64206	0.105212	0.131572
ENSG00000008952.16|mRNA|SEC62|ENSG00000008952.16|ENSG00000008952.16|0|7928	-0.198364	8.32327	3.51124	0.0620121	0.081125
ENSG00000008988.9|mRNA|RPS20|ENSG00000008988.9|ENSG00000008988.9|0|3002	-1.32403	9.22527	164.395	7.8888e-30	2.66681e-27
ENSG00000009307.15|mRNA|CSDE1|ENSG00000009307.15|ENSG00000009307.15|0|5778	0.157583	10.2533	3.26707	0.0717744	0.0928185
ENSG00000009335.17|mRNA|UBE3C|ENSG00000009335.17|ENSG00000009335.17|0|9220	0.141154	5.8974	3.34486	0.0684959	0.0889074
ENSG00000009413.15|mRNA|REV3L|ENSG00000009413.15|ENSG00000009413.15|0|12425	0.154578	5.4931	3.03386	0.0826597	0.105527
ENSG00000009780.15|mRNA|FAM76A|ENSG00000009780.15|ENSG00000009780.15|0|4034	-0.733306	3.33728	34.3	1.34219e-08	6.0703e-08
ENSG00000009790.14|mRNA|TRAF3IP3|ENSG00000009790.14|ENSG00000009790.14|0|7750	-1.04749	6.58163	59.2536	2.48971e-13	3.75215e-12
ENSG00000009844.15|mRNA|VTA1|ENSG00000009844.15|ENSG00000009844.15|0|7262	0.221585	5.55504	5.52687	0.0194314	0.0279947
ENSG00000009954.10|mRNA|BAZ1B|ENSG00000009954.10|ENSG00000009954.10|0|7053	-0.278116	6.57888	11.0871	0.000987824	0.00182698
ENSG00000010017.12|mRNA|RANBP9|ENSG00000010017.12|ENSG00000010017.12|0|3347	0.841969	8.69295	35.6971	7.1018e-09	3.3984e-08
ENSG00000010072.15|mRNA|SPRTN|ENSG00000010072.15|ENSG00000010072.15|0|5906	-0.547027	2.36509	9.78236	0.00195071	0.00340215
ENSG00000010165.19|mRNA|METTL13|ENSG00000010165.19|ENSG00000010165.19|0|3827	-0.773415	2.86705	15.7312	9.31384e-05	0.000209359
ENSG00000010219.13|mRNA|DYRK4|ENSG00000010219.13|ENSG00000010219.13|0|7054	-0.984852	3.41027	40.4856	8.22396e-10	4.76268e-09
ENSG00000010244.18|mRNA|ZNF207|ENSG00000010244.18|ENSG00000010244.18|0|15834	0.351101	7.6089	15.8321	8.856e-05	0.000199721
ENSG00000010256.10|mRNA|UQCRC1|ENSG00000010256.10|ENSG00000010256.10|0|3236	-0.993749	5.24339	60.5447	1.45258e-13	2.37085e-12
ENSG00000010270.13|mRNA|STARD3NL|ENSG00000010270.13|ENSG00000010270.13|0|4348	0.379714	4.95539	10.8599	0.00111139	0.00203589
ENSG00000010278.12|mRNA|CD9|ENSG00000010278.12|ENSG00000010278.12|0|3299	1.45342	8.64843	50.0055	1.2639e-11	1.14984e-10
ENSG00000010292.12|mRNA|NCAPD2|ENSG00000010292.12|ENSG00000010292.12|0|6487	-0.709017	5.44205	40.7578	7.2839e-10	4.28673e-09
ENSG00000010295.19|mRNA|IFFO1|ENSG00000010295.19|ENSG00000010295.19|0|5203	-0.5778	2.86757	7.57939	0.00629625	0.0099429
ENSG00000010318.20|mRNA|PHF7|ENSG00000010318.20|ENSG00000010318.20|0|3367	0.684874	4.80916	25.9908	6.38498e-07	2.13314e-06
ENSG00000010322.15|mRNA|NISCH|ENSG00000010322.15|ENSG00000010322.15|0|9161	-0.283968	3.81399	2.28307	0.131939	0.16185
ENSG00000010327.10|mRNA|STAB1|ENSG00000010327.10|ENSG00000010327.10|0|10588	0.558844	3.45017	5.57955	0.0188668	0.0272384
ENSG00000010361.13|mRNA|FUZ|ENSG00000010361.13|ENSG00000010361.13|0|2950	-0.0902164	1.75019	0.174815	0.676193	0.713166
ENSG00000010404.17|mRNA|IDS|ENSG00000010404.17|ENSG00000010404.17|0|9292	0.601805	7.15175	29.7358	1.10117e-07	4.2131e-07
ENSG00000010539.11|mRNA|ZNF200|ENSG00000010539.11|ENSG00000010539.11|0|7498	-1.07135	2.13662	25.2421	9.10562e-07	2.95312e-06
ENSG00000010610.9|mRNA|CD4|ENSG00000010610.9|ENSG00000010610.9|0|4583	0.39137	4.01261	1.68154	0.195804	0.232653
ENSG00000010626.14|mRNA|LRRC23|ENSG00000010626.14|ENSG00000010626.14|0|3054	0.805219	4.09108	27.6693	2.89401e-07	1.02597e-06
ENSG00000010671.15|mRNA|BTK|ENSG00000010671.15|ENSG00000010671.15|0|4575	0.747843	8.04991	34.9997	9.75378e-09	4.54531e-08
ENSG00000010803.16|mRNA|SCMH1|ENSG00000010803.16|ENSG00000010803.16|0|4447	-0.707683	5.88097	50.9265	8.50097e-12	8.15153e-11
ENSG00000010810.17|mRNA|FYN|ENSG00000010810.17|ENSG00000010810.17|0|7411	0.413277	8.05494	18.3516	2.54002e-05	6.34245e-05
ENSG00000010818.9|mRNA|HIVEP2|ENSG00000010818.9|ENSG00000010818.9|0|10682	-0.128804	4.23491	1.2705	0.308745	0.351299
ENSG00000011007.12|mRNA|ELOA|ENSG00000011007.12|ENSG00000011007.12|0|5391	-0.511269	4.6615	19.7904	1.25515e-05	3.31796e-05
ENSG00000011009.10|mRNA|LYPLA2|ENSG00000011009.10|ENSG00000011009.10|0|2196	-0.668575	3.63611	27.0421	3.88705e-07	1.3483e-06
ENSG00000011021.21|mRNA|CLCN6|ENSG00000011021.21|ENSG00000011021.21|0|6938	0.843993	3.41979	22.8922	2.79661e-06	8.28433e-06
ENSG00000011028.13|mRNA|MRC2|ENSG00000011028.13|ENSG00000011028.13|0|6860	-1.37477	2.10295	32.9326	2.51119e-08	1.0785e-07
ENSG00000011052.21|mRNA|NME1-NME2|ENSG00000011052.21|ENSG00000011052.21|0|1241	-1.5886	6.67637	157.768	6.46617e-29	1.79122e-26
ENSG00000011105.12|mRNA|TSPAN9|ENSG00000011105.12|ENSG00000011105.12|0|6905	1.64304	6.06099	62.1174	7.55826e-14	1.32121e-12
ENSG00000011114.14|mRNA|BTBD7|ENSG00000011114.14|ENSG00000011114.14|0|11333	0.109765	4.21638	1.1294	0.288835	0.330435
ENSG00000011132.11|mRNA|APBA3|ENSG00000011132.11|ENSG00000011132.11|0|5556	-0.748269	2.40967	18.91	1.93076e-05	4.93706e-05
ENSG00000011143.16|mRNA|MKS1|ENSG00000011143.16|ENSG00000011143.16|0|4078	-0.226806	2.24587	1.48285	0.224371	0.263055
ENSG00000011198.7|mRNA|ABHD5|ENSG00000011198.7|ENSG00000011198.7|0|3172	0.361163	4.98609	8.40226	0.00404895	0.00663514
ENSG00000011243.17|mRNA|AKAP8L|ENSG00000011243.17|ENSG00000011243.17|0|5081	-0.525382	5.22803	20.2647	9.96081e-06	2.67819e-05
ENSG00000011258.15|mRNA|MBTD1|ENSG00000011258.15|ENSG00000011258.15|0|7201	1.20315	7.74514	50.8797	8.67369e-12	8.28131e-11
ENSG00000011260.13|mRNA|UTP18|ENSG00000011260.13|ENSG00000011260.13|0|2721	-0.258798	5.78962	9.5923	0.00215562	0.00372919
ENSG00000011275.18|mRNA|RNF216|ENSG00000011275.18|ENSG00000011275.18|0|7619	0.669573	6.72662	41.278	5.77768e-10	3.47096e-09
ENSG00000011295.15|mRNA|TTC19|ENSG00000011295.15|ENSG00000011295.15|0|5966	0.458157	3.99715	12.0447	0.000602716	0.00116057
ENSG00000011304.19|mRNA|PTBP1|ENSG00000011304.19|ENSG00000011304.19|0|6883	0.039634	6.88109	0.178571	0.672933	0.710216
ENSG00000011376.9|mRNA|LARS2|ENSG00000011376.9|ENSG00000011376.9|0|5393	0.168364	2.25948	0.480687	0.488695	0.533032
ENSG00000011405.13|mRNA|PIK3C2A|ENSG00000011405.13|ENSG00000011405.13|0|9204	0.295786	6.61612	17.3433	4.17749e-05	0.000100469
ENSG00000011422.11|mRNA|PLAUR|ENSG00000011422.11|ENSG00000011422.11|0|4457	-0.339833	3.62937	1.88644	0.17072	0.205112
ENSG00000011426.10|mRNA|ANLN|ENSG00000011426.10|ENSG00000011426.10|0|6012	0.332491	4.79737	6.98788	0.00867637	0.0133454
ENSG00000011451.17|mRNA|WIZ|ENSG00000011451.17|ENSG00000011451.17|0|7965	-1.04713	2.24922	23.5619	2.02857e-06	6.16484e-06
ENSG00000011454.16|mRNA|RABGAP1|ENSG00000011454.16|ENSG00000011454.16|0|9162	1.00116	8.09857	55.3709	1.27586e-12	1.54506e-11
ENSG00000011485.14|mRNA|PPP5C|ENSG00000011485.14|ENSG00000011485.14|0|7059	-0.98045	5.15457	73.1303	8.52263e-16	2.45997e-14
ENSG00000011523.13|mRNA|CEP68|ENSG00000011523.13|ENSG00000011523.13|0|8623	0.135753	3.98287	1.07608	0.300485	0.342722
ENSG00000011566.14|mRNA|MAP4K3|ENSG00000011566.14|ENSG00000011566.14|0|6067	0.456411	5.36984	17.3457	4.17247e-05	0.000100362
ENSG00000011600.11|mRNA|TYROBP|ENSG00000011600.11|ENSG00000011600.11|0|907	-1.17908	7.09125	83.9684	1.19231e-17	5.70277e-16
ENSG00000011638.10|mRNA|TMEM159|ENSG00000011638.10|ENSG00000011638.10|0|2558	0.961986	4.07102	38.5373	1.9678e-09	1.05278e-08
ENSG00000011677.12|mRNA|GABRA3|ENSG00000011677.12|ENSG00000011677.12|0|4193	0.0369234	1.88674	0.00767789	0.93024	0.942814
ENSG00000012048.20|mRNA|BRCA1|ENSG00000012048.20|ENSG00000012048.20|0|8922	0.802419	5.41869	31.1387	5.74221e-08	2.30718e-07
ENSG00000012061.15|mRNA|ERCC1|ENSG00000012061.15|ENSG00000012061.15|0|5576	-0.630201	4.69498	26.3301	5.43844e-07	1.83443e-06
ENSG00000012124.16|mRNA|CD22|ENSG00000012124.16|ENSG00000012124.16|0|6159	-1.10774	4.88347	79.5301	6.7373e-17	2.6983e-15
ENSG00000012174.11|mRNA|MBTPS2|ENSG00000012174.11|ENSG00000012174.11|0|8927	0.340758	1.99428	3.13943	0.0775255	0.0995395
ENSG00000012211.12|mRNA|PRICKLE3|ENSG00000012211.12|ENSG00000012211.12|0|3194	-0.628774	1.99776	9.50251	0.00225994	0.00389177
ENSG00000012223.12|mRNA|LTF|ENSG00000012223.12|ENSG00000012223.12|0|4247	-1.52521	3.27613	49.6281	1.48749e-11	1.3221e-10
ENSG00000012232.8|mRNA|EXTL3|ENSG00000012232.8|ENSG00000012232.8|0|13220	-0.0526159	1.93927	0.056512	0.812273	0.838669
ENSG00000012660.13|mRNA|ELOVL5|ENSG00000012660.13|ENSG00000012660.13|0|3813	0.121275	6.04457	1.81405	0.179129	0.214411
ENSG00000012779.10|mRNA|ALOX5|ENSG00000012779.10|ENSG00000012779.10|0|3730	-1.11051	5.67326	67.8375	7.21727e-15	1.68756e-13
ENSG00000012817.15|mRNA|KDM5D|ENSG00000012817.15|ENSG00000012817.15|0|9463	0.832391	4.67225	7.40516	0.00691781	0.0108403
ENSG00000012822.15|mRNA|CALCOCO1|ENSG00000012822.15|ENSG00000012822.15|0|8898	0.830308	7.21114	45.9624	7.31746e-11	5.45188e-10
ENSG00000012963.14|mRNA|UBR7|ENSG00000012963.14|ENSG00000012963.14|0|3694	-0.395468	4.27594	13.5258	0.000282887	0.000580651
ENSG00000012983.11|mRNA|MAP4K5|ENSG00000012983.11|ENSG00000012983.11|0|7620	0.985822	7.92232	56.7592	7.09615e-13	9.14885e-12
ENSG00000013016.15|mRNA|EHD3|ENSG00000013016.15|ENSG00000013016.15|0|4636	1.02356	6.49147	34.4827	1.23475e-08	5.63418e-08
ENSG00000013275.7|mRNA|PSMC4|ENSG00000013275.7|ENSG00000013275.7|0|2387	-0.897091	5.35836	79.3035	7.36445e-17	2.92016e-15
ENSG00000013288.8|mRNA|MAN2B2|ENSG00000013288.8|ENSG00000013288.8|0|8898	-0.216628	2.72397	0.781077	0.377582	0.42178
ENSG00000013306.15|mRNA|SLC25A39|ENSG00000013306.15|ENSG00000013306.15|0|3526	-0.996978	6.50179	34.5752	1.18372e-08	5.42367e-08
ENSG00000013364.18|mRNA|MVP|ENSG00000013364.18|ENSG00000013364.18|0|6141	-0.810668	5.74879	30.7527	6.86632e-08	2.72698e-07
ENSG00000013374.15|mRNA|NUB1|ENSG00000013374.15|ENSG00000013374.15|0|5411	-0.674716	6.36975	48.6884	2.23344e-11	1.89477e-10
ENSG00000013375.15|mRNA|PGM3|ENSG00000013375.15|ENSG00000013375.15|0|7335	-0.00299881	2.87237	0.000232491	0.987846	0.990428
ENSG00000013441.15|mRNA|CLK1|ENSG00000013441.15|ENSG00000013441.15|0|5170	0.110738	6.74928	1.99659	0.158782	0.191899
ENSG00000013503.9|mRNA|POLR3B|ENSG00000013503.9|ENSG00000013503.9|0|4858	-0.295699	2.75183	3.42178	0.065412	0.0851928
ENSG00000013523.9|mRNA|ANGEL1|ENSG00000013523.9|ENSG00000013523.9|0|6414	0.202566	1.56814	0.517204	0.472646	0.517451
ENSG00000013561.17|mRNA|RNF14|ENSG00000013561.17|ENSG00000013561.17|0|4987	-0.194431	5.81376	4.81823	0.0289944	0.0403538
ENSG00000013563.13|mRNA|DNASE1L1|ENSG00000013563.13|ENSG00000013563.13|0|4130	0.0144255	3.78156	0.0118839	0.913271	0.928968
ENSG00000013573.16|mRNA|DDX11|ENSG00000013573.16|ENSG00000013573.16|0|8374	-0.1557	2.45644	0.326079	0.568442	0.610565
ENSG00000013583.8|mRNA|HEBP1|ENSG00000013583.8|ENSG00000013583.8|0|3442	-0.669493	3.96156	25.7115	7.2878e-07	2.40654e-06
ENSG00000013725.14|mRNA|CD6|ENSG00000013725.14|ENSG00000013725.14|0|5958	-0.985593	2.9491	28.3036	2.14927e-07	7.79402e-07
ENSG00000013810.18|mRNA|TACC3|ENSG00000013810.18|ENSG00000013810.18|0|6528	0.571333	6.69604	29.4024	1.28619e-07	4.86222e-07
ENSG00000014123.9|mRNA|UFL1|ENSG00000014123.9|ENSG00000014123.9|0|4539	-0.740352	5.04724	27.6474	2.92385e-07	1.03471e-06
ENSG00000014138.8|mRNA|POLA2|ENSG00000014138.8|ENSG00000014138.8|0|5726	-0.316378	3.27935	5.0799	0.0249907	0.0351958
ENSG00000014164.6|mRNA|ZC3H3|ENSG00000014164.6|ENSG00000014164.6|0|3731	-0.293354	3.12527	2.99159	0.0848176	0.108054
ENSG00000014216.15|mRNA|CAPN1|ENSG00000014216.15|ENSG00000014216.15|0|7553	1.07923	8.44461	49.3868	1.65095e-11	1.4493e-10
ENSG00000014257.15|mRNA|ACPP|ENSG00000014257.15|ENSG00000014257.15|0|4193	-0.13641	1.96442	0.315018	0.575073	0.617023
ENSG00000014641.17|mRNA|MDH1|ENSG00000014641.17|ENSG00000014641.17|0|4990	-0.987397	4.70484	68.6091	5.27423e-15	1.2775e-13
ENSG00000014824.13|mRNA|SLC30A9|ENSG00000014824.13|ENSG00000014824.13|0|7225	0.0448233	5.7719	0.302385	0.582836	0.624579
ENSG00000014914.20|mRNA|MTMR11|ENSG00000014914.20|ENSG00000014914.20|0|4562	-1.34078	2.5784	46.4577	5.89329e-11	4.50869e-10
ENSG00000014919.12|mRNA|COX15|ENSG00000014919.12|ENSG00000014919.12|0|4177	-0.714224	2.82963	16.5552	6.17596e-05	0.000143583
ENSG00000015133.18|mRNA|CCDC88C|ENSG00000015133.18|ENSG00000015133.18|0|12426	0.0150625	6.87911	0.0295623	0.863613	0.885046
ENSG00000015153.14|mRNA|YAF2|ENSG00000015153.14|ENSG00000015153.14|0|10839	0.0952187	5.07279	1.23199	0.267989	0.308676
ENSG00000015171.19|mRNA|ZMYND11|ENSG00000015171.19|ENSG00000015171.19|0|5300	0.371384	6.95833	14.6899	0.000157038	0.000339525
ENSG00000015285.10|mRNA|WAS|ENSG00000015285.10|ENSG00000015285.10|0|2381	-1.10039	6.55871	85.512	6.56309e-18	3.38245e-16
ENSG00000015475.18|mRNA|BID|ENSG00000015475.18|ENSG00000015475.18|0|4446	-0.261761	5.58115	6.14375	0.0137866	0.0204108
ENSG00000015479.18|mRNA|MATR3|ENSG00000015479.18|ENSG00000015479.18|0|12090	0.0962834	8.65523	1.52482	0.217943	0.256143
ENSG00000015532.9|mRNA|XYLT2|ENSG00000015532.9|ENSG00000015532.9|0|5472	1.29781	3.879	42.2821	3.69936e-10	2.32683e-09
ENSG00000015568.12|mRNA|RGPD5|ENSG00000015568.12|ENSG00000015568.12|0|14175	0.351929	5.3086	13.468	0.000291315	0.000596783
ENSG00000015676.17|mRNA|NUDCD3|ENSG00000015676.17|ENSG00000015676.17|0|10113	-0.576251	4.48364	22.4593	3.44365e-06	1.00517e-05
ENSG00000016864.18|mRNA|GLT8D1|ENSG00000016864.18|ENSG00000016864.18|0|3783	0.163067	3.20421	1.09864	0.295483	0.337402
ENSG00000017260.19|mRNA|ATP2C1|ENSG00000017260.19|ENSG00000017260.19|0|8533	1.17534	7.57035	55.8111	1.05901e-12	1.30706e-11
ENSG00000017483.14|mRNA|SLC38A5|ENSG00000017483.14|ENSG00000017483.14|0|4014	-0.51076	3.13058	8.18754	0.00454116	0.0073723
ENSG00000017797.12|mRNA|RALBP1|ENSG00000017797.12|ENSG00000017797.12|0|8043	-0.122497	7.15791	3.1707	0.0760719	0.0978495
ENSG00000018189.12|mRNA|RUFY3|ENSG00000018189.12|ENSG00000018189.12|0|8070	-0.441248	4.49427	6.19233	0.0134214	0.0199382
ENSG00000018280.16|mRNA|SLC11A1|ENSG00000018280.16|ENSG00000018280.16|0|8676	-0.494378	3.7588	5.49206	0.0198141	0.0285028
ENSG00000018408.14|mRNA|WWTR1|ENSG00000018408.14|ENSG00000018408.14|0|8413	-1.56597	5.11115	82.3713	2.21768e-17	1.00148e-15
ENSG00000018510.13|mRNA|AGPS|ENSG00000018510.13|ENSG00000018510.13|0|8745	-0.292915	5.43519	11.9442	0.000634676	0.00121717
ENSG00000018610.13|mRNA|CXorf56|ENSG00000018610.13|ENSG00000018610.13|0|2580	-0.890715	4.30056	60.6768	1.37486e-13	2.26251e-12
ENSG00000018699.11|mRNA|TTC27|ENSG00000018699.11|ENSG00000018699.11|0|3185	0.994065	6.89124	33.8607	1.64079e-08	7.29178e-08
ENSG00000019144.18|mRNA|PHLDB1|ENSG00000019144.18|ENSG00000019144.18|0|21722	-0.977621	2.5764	22.2996	3.71892e-06	1.07983e-05
ENSG00000019169.10|mRNA|MARCO|ENSG00000019169.10|ENSG00000019169.10|0|2079	-1.36627	3.35461	37.0837	3.78869e-09	1.91985e-08
ENSG00000019582.14|mRNA|CD74|ENSG00000019582.14|ENSG00000019582.14|0|3184	-0.337108	9.34044	4.53781	0.0340399	0.0467612
ENSG00000019995.6|mRNA|ZRANB1|ENSG00000019995.6|ENSG00000019995.6|0|5993	-0.542345	4.66766	21.4505	5.6029e-06	1.5795e-05
ENSG00000020256.19|mRNA|ZFP64|ENSG00000020256.19|ENSG00000020256.19|0|6997	-0.558217	2.43002	9.44683	0.0023272	0.00399966
ENSG00000020426.10|mRNA|MNAT1|ENSG00000020426.10|ENSG00000020426.10|0|3865	0.339692	5.32758	12.2057	0.0005549	0.0010766
ENSG00000020577.13|mRNA|SAMD4A|ENSG00000020577.13|ENSG00000020577.13|0|12170	-0.947213	3.35492	35.8404	6.65431e-09	3.20116e-08
ENSG00000020633.18|mRNA|RUNX3|ENSG00000020633.18|ENSG00000020633.18|0|4523	-1.29961	4.39564	62.9577	5.33832e-14	9.74134e-13
ENSG00000020922.12|mRNA|MRE11|ENSG00000020922.12|ENSG00000020922.12|0|7689	0.0687893	5.80135	0.559852	0.454958	0.499677
ENSG00000021355.12|mRNA|SERPINB1|ENSG00000021355.12|ENSG00000021355.12|0|3094	0.782964	8.61121	35.369	8.24414e-09	3.89735e-08
ENSG00000021574.11|mRNA|SPAST|ENSG00000021574.11|ENSG00000021574.11|0|5213	0.575686	6.18766	30.8443	6.58075e-08	2.62191e-07
ENSG00000021762.19|mRNA|OSBPL5|ENSG00000021762.19|ENSG00000021762.19|0|7466	-0.85888	4.06902	24.1051	1.56467e-06	4.85038e-06
ENSG00000021776.10|mRNA|AQR|ENSG00000021776.10|ENSG00000021776.10|0|13528	-0.0148079	5.94512	0.0297633	0.863155	0.884758
ENSG00000022267.16|mRNA|FHL1|ENSG00000022267.16|ENSG00000022267.16|0|5997	1.36138	7.52241	51.8778	5.65118e-12	5.70409e-11
ENSG00000022277.12|mRNA|RTFDC1|ENSG00000022277.12|ENSG00000022277.12|0|4063	-0.522281	6.74362	39.0845	1.53915e-09	8.4174e-09
ENSG00000022567.9|mRNA|SLC45A4|ENSG00000022567.9|ENSG00000022567.9|0|8608	1.07286	4.82849	54.44	1.89368e-12	2.17817e-11
ENSG00000022840.15|mRNA|RNF10|ENSG00000022840.15|ENSG00000022840.15|0|5911	-0.0304057	7.88308	0.0915956	0.762387	0.793747
ENSG00000023041.11|mRNA|ZDHHC6|ENSG00000023041.11|ENSG00000023041.11|0|3748	-0.671676	3.26104	14.306	0.000190577	0.000404324
ENSG00000023171.16|mRNA|GRAMD1B|ENSG00000023171.16|ENSG00000023171.16|0|14408	0.544061	3.7724	2.48615	0.115999	0.143935
ENSG00000023191.16|mRNA|RNH1|ENSG00000023191.16|ENSG00000023191.16|0|7374	-0.47358	5.64184	19.2777	1.61252e-05	4.18554e-05
ENSG00000023228.13|mRNA|NDUFS1|ENSG00000023228.13|ENSG00000023228.13|0|12268	-0.0718251	6.08316	0.773384	0.379938	0.42415
ENSG00000023287.12|mRNA|RB1CC1|ENSG00000023287.12|ENSG00000023287.12|0|7615	-0.762326	5.60838	56.6145	7.54263e-13	9.63727e-12
ENSG00000023318.7|mRNA|ERP44|ENSG00000023318.7|ENSG00000023318.7|0|4854	0.215428	5.91672	6.8977	0.00911349	0.0139747
ENSG00000023330.14|mRNA|ALAS1|ENSG00000023330.14|ENSG00000023330.14|0|2536	-1.02898	4.88172	76.051	2.66056e-16	8.85892e-15
ENSG00000023445.13|mRNA|BIRC3|ENSG00000023445.13|ENSG00000023445.13|0|7518	-0.615122	5.29842	16.8451	5.34748e-05	0.000125966
ENSG00000023516.8|mRNA|AKAP11|ENSG00000023516.8|ENSG00000023516.8|0|9920	-0.302736	4.65943	7.54518	0.0064136	0.0101082
ENSG00000023572.8|mRNA|GLRX2|ENSG00000023572.8|ENSG00000023572.8|0|1299	-0.931168	2.03926	23.6147	1.97798e-06	6.02027e-06
ENSG00000023608.4|mRNA|SNAPC1|ENSG00000023608.4|ENSG00000023608.4|0|2656	-0.307838	4.00014	7.11882	0.00807978	0.0125059
ENSG00000023697.12|mRNA|DERA|ENSG00000023697.12|ENSG00000023697.12|0|2844	1.27547	7.0999	58.3523	3.6314e-13	5.19571e-12
ENSG00000023734.10|mRNA|STRAP|ENSG00000023734.10|ENSG00000023734.10|0|2211	0.617161	6.48603	33.1813	2.24011e-08	9.70352e-08
ENSG00000023892.10|mRNA|DEF6|ENSG00000023892.10|ENSG00000023892.10|0|2545	-0.923496	6.22958	35.3203	8.42889e-09	3.97715e-08
ENSG00000023902.13|mRNA|PLEKHO1|ENSG00000023902.13|ENSG00000023902.13|0|6565	0.812551	8.34104	52.7017	3.97193e-12	4.17607e-11
ENSG00000023909.9|mRNA|GCLM|ENSG00000023909.9|ENSG00000023909.9|0|5420	0.920664	5.7828	34.251	1.3726e-08	6.20078e-08
ENSG00000024048.10|mRNA|UBR2|ENSG00000024048.10|ENSG00000024048.10|0|8840	0.0618349	7.46221	0.641769	0.423761	0.468562
ENSG00000024422.11|mRNA|EHD2|ENSG00000024422.11|ENSG00000024422.11|0|3923	0.601084	3.76714	14.5626	0.000167439	0.000360023
ENSG00000024526.16|mRNA|DEPDC1|ENSG00000024526.16|ENSG00000024526.16|0|5904	0.44748	2.77139	5.01916	0.0258655	0.0362994
ENSG00000024862.17|mRNA|CCDC28A|ENSG00000024862.17|ENSG00000024862.17|0|1507	-0.0349768	5.57993	0.076794	0.781898	0.811265
ENSG00000025039.14|mRNA|RRAGD|ENSG00000025039.14|ENSG00000025039.14|0|5072	-0.957091	3.10188	32.3283	3.31581e-08	1.39376e-07
ENSG00000025156.12|mRNA|HSF2|ENSG00000025156.12|ENSG00000025156.12|0|2702	-0.624475	3.05523	14.3346	0.000187838	0.000399151
ENSG00000025293.16|mRNA|PHF20|ENSG00000025293.16|ENSG00000025293.16|0|8383	0.0844464	6.39336	1.03054	0.310923	0.353555
ENSG00000025434.18|mRNA|NR1H3|ENSG00000025434.18|ENSG00000025434.18|0|4533	-1.33969	2.0805	43.1826	2.48353e-10	1.62088e-09
ENSG00000025708.13|mRNA|TYMP|ENSG00000025708.13|ENSG00000025708.13|0|3320	-0.881138	6.18439	40.2224	9.24938e-10	5.28593e-09
ENSG00000025770.18|mRNA|NCAPH2|ENSG00000025770.18|ENSG00000025770.18|0|3159	-0.851154	2.85687	18.4057	2.47337e-05	6.19196e-05
ENSG00000025772.7|mRNA|TOMM34|ENSG00000025772.7|ENSG00000025772.7|0|2062	-1.09032	2.93636	47.3029	4.07666e-11	3.22911e-10
ENSG00000025796.13|mRNA|SEC63|ENSG00000025796.13|ENSG00000025796.13|0|8587	0.538162	7.02591	30.3812	8.15766e-08	3.19844e-07
ENSG00000025800.13|mRNA|KPNA6|ENSG00000025800.13|ENSG00000025800.13|0|7480	-0.289645	4.88044	7.85778	0.00541962	0.00867043
ENSG00000026025.15|mRNA|VIM|ENSG00000026025.15|ENSG00000026025.15|0|5158	-1.37223	8.80615	132.383	2.80141e-25	4.87367e-23
ENSG00000026036.21|mRNA|RTEL1-TNFRSF6B|ENSG00000026036.21|ENSG00000026036.21|0|8738	-0.501706	2.97198	4.57115	0.0333945	0.0459416
ENSG00000026103.21|mRNA|FAS|ENSG00000026103.21|ENSG00000026103.21|0|4253	-1.09713	2.93343	29.0202	1.53728e-07	5.72143e-07
ENSG00000026297.15|mRNA|RNASET2|ENSG00000026297.15|ENSG00000026297.15|0|7643	-0.0276591	5.53581	0.0286091	0.865809	0.886886
ENSG00000026508.17|mRNA|CD44|ENSG00000026508.17|ENSG00000026508.17|0|10057	-0.851582	6.88215	50.9679	8.35091e-12	8.0294e-11
ENSG00000026751.16|mRNA|SLAMF7|ENSG00000026751.16|ENSG00000026751.16|0|4833	-0.0997325	4.07604	0.147429	0.701301	0.736763
ENSG00000026950.16|mRNA|BTN3A1|ENSG00000026950.16|ENSG00000026950.16|0|5547	0.469108	4.63257	12.4349	0.000493384	0.00096694
ENSG00000027001.9|mRNA|MIPEP|ENSG00000027001.9|ENSG00000027001.9|0|3407	0.0598912	3.21626	0.166631	0.68344	0.719971
ENSG00000027075.14|mRNA|PRKCH|ENSG00000027075.14|ENSG00000027075.14|0|8833	-1.17175	5.48784	65.8555	1.62079e-14	3.42081e-13
ENSG00000027697.13|mRNA|IFNGR1|ENSG00000027697.13|ENSG00000027697.13|0|2571	1.01507	5.91148	59.712	2.05565e-13	3.19066e-12
ENSG00000027847.13|mRNA|B4GALT7|ENSG00000027847.13|ENSG00000027847.13|0|4927	-0.527302	2.01487	5.61321	0.018515	0.0267674
ENSG00000027869.11|mRNA|SH2D2A|ENSG00000027869.11|ENSG00000027869.11|0|2512	-1.21443	4.0626	55.6076	1.15423e-12	1.40974e-11
ENSG00000028116.16|mRNA|VRK2|ENSG00000028116.16|ENSG00000028116.16|0|3509	0.564993	6.99002	31.9721	3.90726e-08	1.61883e-07
ENSG00000028137.18|mRNA|TNFRSF1B|ENSG00000028137.18|ENSG00000028137.18|0|3766	-0.0699789	4.16621	0.0894462	0.765108	0.796122
ENSG00000028203.17|mRNA|VEZT|ENSG00000028203.17|ENSG00000028203.17|0|8757	0.530442	5.75211	20.8777	7.39464e-06	2.03654e-05
ENSG00000028277.21|mRNA|POU2F2|ENSG00000028277.21|ENSG00000028277.21|0|9072	-1.10872	5.02609	58.9057	2.87982e-13	4.24838e-12
ENSG00000028310.17|mRNA|BRD9|ENSG00000028310.17|ENSG00000028310.17|0|9572	-0.475629	4.19245	9.71327	0.0020228	0.00351863
ENSG00000028528.14|mRNA|SNX1|ENSG00000028528.14|ENSG00000028528.14|0|9780	-0.136327	6.77648	3.50704	0.0621673	0.0813002
ENSG00000028839.9|mRNA|TBPL1|ENSG00000028839.9|ENSG00000028839.9|0|5039	0.959234	6.67627	43.8842	1.82228e-10	1.22664e-09
ENSG00000029153.14|mRNA|ARNTL2|ENSG00000029153.14|ENSG00000029153.14|0|6983	1.04038	5.86319	36.2697	5.47642e-09	2.6857e-08
ENSG00000029363.16|mRNA|BCLAF1|ENSG00000029363.16|ENSG00000029363.16|0|9533	-0.420542	6.69392	16.4666	6.45413e-05	0.000149527
ENSG00000029364.11|mRNA|SLC39A9|ENSG00000029364.11|ENSG00000029364.11|0|7136	0.320047	3.2033	5.02523	0.0257767	0.0361926
ENSG00000029534.19|mRNA|ANK1|ENSG00000029534.19|ENSG00000029534.19|0|10799	0.628272	8.31195	20.6642	8.20216e-06	2.23945e-05
ENSG00000029639.10|mRNA|TFB1M|ENSG00000029639.10|ENSG00000029639.10|0|2736	-1.00443	2.38638	24.4075	1.35442e-06	4.25416e-06
ENSG00000029725.16|mRNA|RABEP1|ENSG00000029725.16|ENSG00000029725.16|0|6531	-0.468933	7.28251	40.8686	6.93293e-10	4.10104e-09
ENSG00000029993.14|mRNA|HMGB3|ENSG00000029993.14|ENSG00000029993.14|0|3967	-0.897408	4.06185	28.133	2.32812e-07	8.39008e-07
ENSG00000030066.13|mRNA|NUP160|ENSG00000030066.13|ENSG00000030066.13|0|8576	-0.394722	4.82514	9.04366	0.00287943	0.00486573
ENSG00000030110.12|mRNA|BAK1|ENSG00000030110.12|ENSG00000030110.12|0|2212	-0.890086	2.74103	24.3879	1.36713e-06	4.28936e-06
ENSG00000030419.16|mRNA|IKZF2|ENSG00000030419.16|ENSG00000030419.16|0|12240	-0.887232	2.06791	17.6714	3.55192e-05	8.64402e-05
ENSG00000030582.17|mRNA|GRN|ENSG00000030582.17|ENSG00000030582.17|0|3680	0.676819	5.70331	9.94261	0.00179344	0.00315439
ENSG00000031003.10|mRNA|FAM13B|ENSG00000031003.10|ENSG00000031003.10|0|6808	0.622106	9.29473	26.8537	4.24787e-07	1.46404e-06
ENSG00000031081.10|mRNA|ARHGAP31|ENSG00000031081.10|ENSG00000031081.10|0|9384	-0.859523	3.83908	20.0232	1.12041e-05	2.98979e-05
ENSG00000031691.6|mRNA|CENPQ|ENSG00000031691.6|ENSG00000031691.6|0|1733	-0.632252	2.63552	13.4899	0.00028809	0.000590661
ENSG00000031698.12|mRNA|SARS|ENSG00000031698.12|ENSG00000031698.12|0|3836	-0.869603	6.08457	61.4778	9.85429e-14	1.67986e-12
ENSG00000031823.14|mRNA|RANBP3|ENSG00000031823.14|ENSG00000031823.14|0|7445	-0.422713	5.251	19.2119	1.66524e-05	4.31285e-05
ENSG00000032219.18|mRNA|ARID4A|ENSG00000032219.18|ENSG00000032219.18|0|7568	-0.474755	6.39121	25.4695	8.17389e-07	2.67654e-06
ENSG00000032389.12|mRNA|EIPR1|ENSG00000032389.12|ENSG00000032389.12|0|5775	-0.814968	2.98243	15.9468	8.36263e-05	0.000189688
ENSG00000032444.15|mRNA|PNPLA6|ENSG00000032444.15|ENSG00000032444.15|0|7055	0.036025	4.76025	0.0636245	0.801044	0.828717
ENSG00000032742.17|mRNA|IFT88|ENSG00000032742.17|ENSG00000032742.17|0|6111	0.749919	5.82081	37.0809	3.79351e-09	1.92181e-08
ENSG00000033030.13|mRNA|ZCCHC8|ENSG00000033030.13|ENSG00000033030.13|0|9124	-0.596261	3.82443	21.8501	4.61886e-06	1.32001e-05
ENSG00000033050.7|mRNA|ABCF2|ENSG00000033050.7|ENSG00000033050.7|0|4448	-1.24714	4.47511	74.1899	5.58009e-16	1.67109e-14
ENSG00000033170.16|mRNA|FUT8|ENSG00000033170.16|ENSG00000033170.16|0|6700	1.05143	7.46292	35.2974	8.51718e-09	4.01596e-08
ENSG00000033178.12|mRNA|UBA6|ENSG00000033178.12|ENSG00000033178.12|0|11432	-0.318642	5.1083	8.9671	0.00299858	0.00504868
ENSG00000033327.12|mRNA|GAB2|ENSG00000033327.12|ENSG00000033327.12|0|6771	-0.806079	5.23781	60.2003	1.67677e-13	2.67331e-12
ENSG00000033627.16|mRNA|ATP6V0A1|ENSG00000033627.16|ENSG00000033627.16|0|10955	0.869443	6.05985	60.2611	1.63481e-13	2.62089e-12
ENSG00000033800.13|mRNA|PIAS1|ENSG00000033800.13|ENSG00000033800.13|0|10776	0.279057	7.21914	8.32899	0.00421045	0.00687607
ENSG00000033867.16|mRNA|SLC4A7|ENSG00000033867.16|ENSG00000033867.16|0|9616	0.311363	5.31155	8.42438	0.00400143	0.00656483
ENSG00000034053.14|mRNA|APBA2|ENSG00000034053.14|ENSG00000034053.14|0|6869	-0.341399	3.74834	7.12091	0.0080706	0.0124937
ENSG00000034152.18|mRNA|MAP2K3|ENSG00000034152.18|ENSG00000034152.18|0|3783	0.5705	7.92154	28.3238	2.12902e-07	7.73184e-07
ENSG00000034510.5|mRNA|TMSB10|ENSG00000034510.5|ENSG00000034510.5|0|496	-1.25912	8.79052	105.675	3.40777e-21	3.22124e-19
ENSG00000034533.11|mRNA|ASTE1|ENSG00000034533.11|ENSG00000034533.11|0|3427	-1.14611	1.83973	32.2022	3.51398e-08	1.46747e-07
ENSG00000034677.12|mRNA|RNF19A|ENSG00000034677.12|ENSG00000034677.12|0|6031	-0.541258	5.30476	33.6266	1.82641e-08	8.04856e-08
ENSG00000034693.14|mRNA|PEX3|ENSG00000034693.14|ENSG00000034693.14|0|2222	0.490984	4.16702	15.8876	8.61385e-05	0.000194832
ENSG00000034713.7|mRNA|GABARAPL2|ENSG00000034713.7|ENSG00000034713.7|0|3034	1.00946	8.71141	69.0577	4.39671e-15	1.09342e-13
ENSG00000035115.21|mRNA|SH3YL1|ENSG00000035115.21|ENSG00000035115.21|0|11165	-0.987721	3.00943	33.5677	1.87645e-08	8.24536e-08
ENSG00000035141.7|mRNA|FAM136A|ENSG00000035141.7|ENSG00000035141.7|0|3086	-1.06171	3.54976	47.518	3.71241e-11	2.96651e-10
ENSG00000035403.17|mRNA|VCL|ENSG00000035403.17|ENSG00000035403.17|0|9992	1.54956	11.817	53.7762	2.5115e-12	2.77994e-11
ENSG00000035499.12|mRNA|DEPDC1B|ENSG00000035499.12|ENSG00000035499.12|0|3806	0.715892	3.51504	22.6874	3.0858e-06	9.07093e-06
ENSG00000035664.11|mRNA|DAPK2|ENSG00000035664.11|ENSG00000035664.11|0|13612	0.12628	3.27232	0.365699	0.545856	0.589192
ENSG00000035681.7|mRNA|NSMAF|ENSG00000035681.7|ENSG00000035681.7|0|6165	-0.825866	5.0551	44.9821	1.12441e-10	7.9876e-10
ENSG00000035687.9|mRNA|ADSS|ENSG00000035687.9|ENSG00000035687.9|0|3666	-0.79472	5.25434	45.5282	8.84922e-11	6.4746e-10
ENSG00000035720.7|mRNA|STAP1|ENSG00000035720.7|ENSG00000035720.7|0|1655	-1.60432	4.00537	102.992	9.09716e-21	8.1731e-19
ENSG00000035862.12|mRNA|TIMP2|ENSG00000035862.12|ENSG00000035862.12|0|5633	-0.263096	2.63428	1.73827	0.188453	0.224507
ENSG00000035928.15|mRNA|RFC1|ENSG00000035928.15|ENSG00000035928.15|0|6719	-0.28343	6.2422	11.7845	0.00068903	0.00131163
ENSG00000036054.12|mRNA|TBC1D23|ENSG00000036054.12|ENSG00000036054.12|0|5168	0.510647	6.49147	27.8531	2.65468e-07	9.46675e-07
ENSG00000036257.12|mRNA|CUL3|ENSG00000036257.12|ENSG00000036257.12|0|11505	-0.265212	6.38341	9.93969	0.00179619	0.00315834
ENSG00000036448.9|mRNA|MYOM2|ENSG00000036448.9|ENSG00000036448.9|0|7062	-1.7039	4.33583	55.181	1.38277e-12	1.6624e-11
ENSG00000036549.12|mRNA|ZZZ3|ENSG00000036549.12|ENSG00000036549.12|0|9008	-0.037087	4.90025	0.149693	0.699128	0.734751
ENSG00000037042.8|mRNA|TUBG2|ENSG00000037042.8|ENSG00000037042.8|0|2772	0.481292	3.2744	9.98309	0.0017558	0.00309387
ENSG00000037241.7|mRNA|RPL26L1|ENSG00000037241.7|ENSG00000037241.7|0|1164	-0.834165	4.62411	33.0587	2.36984e-08	1.02375e-07
ENSG00000037474.14|mRNA|NSUN2|ENSG00000037474.14|ENSG00000037474.14|0|5506	-0.23851	5.53944	6.24298	0.0130513	0.0194318
ENSG00000037637.10|mRNA|FBXO42|ENSG00000037637.10|ENSG00000037637.10|0|8984	-0.112942	3.4945	0.769162	0.38124	0.425413
ENSG00000037749.11|mRNA|MFAP3|ENSG00000037749.11|ENSG00000037749.11|0|4792	0.134971	2.35334	0.603837	0.437784	0.482623
ENSG00000037757.13|mRNA|MRI1|ENSG00000037757.13|ENSG00000037757.13|0|3456	-0.0561771	2.0585	0.038329	0.844928	0.868396
ENSG00000038002.8|mRNA|AGA|ENSG00000038002.8|ENSG00000038002.8|0|2675	-0.594727	2.4	9.51768	0.00224195	0.00386614
ENSG00000038210.12|mRNA|PI4K2B|ENSG00000038210.12|ENSG00000038210.12|0|3540	-0.335831	3.83157	6.03269	0.0146606	0.0215909
ENSG00000038219.12|mRNA|BOD1L1|ENSG00000038219.12|ENSG00000038219.12|0|15860	-0.410232	6.75697	12.6439	0.00044333	0.00087825
ENSG00000038274.16|mRNA|MAT2B|ENSG00000038274.16|ENSG00000038274.16|0|5153	-0.133878	7.00486	2.42684	0.120421	0.148865
ENSG00000038358.14|mRNA|EDC4|ENSG00000038358.14|ENSG00000038358.14|0|6173	-0.760636	4.23579	24.2977	1.42724e-06	4.46599e-06
ENSG00000038382.18|mRNA|TRIO|ENSG00000038382.18|ENSG00000038382.18|0|17500	-0.223472	6.03461	4.40201	0.0368073	0.0502788
ENSG00000038427.15|mRNA|VCAN|ENSG00000038427.15|ENSG00000038427.15|0|14831	0.763173	4.61506	6.66885	0.0103276	0.0156847
ENSG00000038532.14|mRNA|CLEC16A|ENSG00000038532.14|ENSG00000038532.14|0|12387	0.213687	5.65834	4.88678	0.0278847	0.0389223
ENSG00000038945.14|mRNA|MSR1|ENSG00000038945.14|ENSG00000038945.14|0|7812	-0.688295	2.61095	10.2454	0.00153068	0.00273462
ENSG00000039068.18|mRNA|CDH1|ENSG00000039068.18|ENSG00000039068.18|0|6177	-0.313811	2.43724	1.00522	0.31693	0.359791
ENSG00000039123.15|mRNA|SKIV2L2|ENSG00000039123.15|ENSG00000039123.15|0|6578	-0.236482	6.1853	7.96476	0.005117	0.00822389
ENSG00000039319.16|mRNA|ZFYVE16|ENSG00000039319.16|ENSG00000039319.16|0|11461	-0.609016	3.52172	13.6698	0.000262943	0.000543067
ENSG00000039523.19|mRNA|RIPOR1|ENSG00000039523.19|ENSG00000039523.19|0|6729	-0.65115	5.13789	13.7905	0.000247342	0.00051404
ENSG00000039560.13|mRNA|RAI14|ENSG00000039560.13|ENSG00000039560.13|0|7687	-1.86889	4.6384	89.0474	1.68879e-18	9.93597e-17
ENSG00000039650.11|mRNA|PNKP|ENSG00000039650.11|ENSG00000039650.11|0|4635	-0.602844	3.23334	10.4525	0.00137384	0.00247795
ENSG00000039987.6|mRNA|BEST2|ENSG00000039987.6|ENSG00000039987.6|0|2646	1.04474	1.92397	20.3133	9.72779e-06	2.62048e-05
ENSG00000040199.18|mRNA|PHLPP2|ENSG00000040199.18|ENSG00000040199.18|0|12493	-0.512613	3.19369	10.2663	0.00151404	0.00270683
ENSG00000040275.16|mRNA|SPDL1|ENSG00000040275.16|ENSG00000040275.16|0|4777	-0.0982211	4.33887	0.810822	0.674938	0.712105
ENSG00000040341.17|mRNA|STAU2|ENSG00000040341.17|ENSG00000040341.17|0|8998	0.966128	8.13954	48.9068	2.03187e-11	1.74154e-10
ENSG00000040531.14|mRNA|CTNS|ENSG00000040531.14|ENSG00000040531.14|0|3398	1.22373	4.7828	49.8367	1.35936e-11	1.22625e-10
ENSG00000040633.12|mRNA|PHF23|ENSG00000040633.12|ENSG00000040633.12|0|2783	-0.807764	3.56305	34.4708	1.24146e-08	5.65707e-08
ENSG00000040933.15|mRNA|INPP4A|ENSG00000040933.15|ENSG00000040933.15|0|13187	-0.117123	5.68865	0.345237	0.557303	0.599796
ENSG00000041353.9|mRNA|RAB27B|ENSG00000041353.9|ENSG00000041353.9|0|7432	1.39286	9.55342	39.6797	1.17889e-09	6.5918e-09
ENSG00000041357.15|mRNA|PSMA4|ENSG00000041357.15|ENSG00000041357.15|0|6996	-1.01397	6.07652	76.4555	2.26626e-16	7.84731e-15
ENSG00000041802.10|mRNA|LSG1|ENSG00000041802.10|ENSG00000041802.10|0|4818	-0.639293	4.20356	22.9191	2.76077e-06	8.18677e-06
ENSG00000041880.14|mRNA|PARP3|ENSG00000041880.14|ENSG00000041880.14|0|2928	-0.546169	2.6344	10.8835	0.00109789	0.00201299
ENSG00000041988.15|mRNA|THAP3|ENSG00000041988.15|ENSG00000041988.15|0|4072	-1.3949	1.85845	41.5266	5.17307e-10	3.14852e-09
ENSG00000042062.11|mRNA|RIPOR3|ENSG00000042062.11|ENSG00000042062.11|0|6009	0.297481	3.80329	3.93897	0.0481714	0.0643824
ENSG00000042088.13|mRNA|TDP1|ENSG00000042088.13|ENSG00000042088.13|0|6227	-0.694366	3.76008	21.7105	4.94106e-06	1.40684e-05
ENSG00000042317.16|mRNA|SPATA7|ENSG00000042317.16|ENSG00000042317.16|0|6872	0.296544	3.3282	2.47907	0.116518	0.144488
ENSG00000042429.11|mRNA|MED17|ENSG00000042429.11|ENSG00000042429.11|0|16610	-0.312974	4.35491	8.47478	0.00389532	0.0064076
ENSG00000042445.13|mRNA|RETSAT|ENSG00000042445.13|ENSG00000042445.13|0|4005	-0.372359	1.64257	1.97459	0.161088	0.194486
ENSG00000042493.15|mRNA|CAPG|ENSG00000042493.15|ENSG00000042493.15|0|2607	-1.03762	4.75146	39.2412	1.43475e-09	7.89844e-09
ENSG00000042753.11|mRNA|AP2S1|ENSG00000042753.11|ENSG00000042753.11|0|1704	0.321588	5.70111	8.85478	0.00318258	0.00532968
ENSG00000042980.12|mRNA|ADAM28|ENSG00000042980.12|ENSG00000042980.12|0|9351	-0.820639	3.50199	17.346	4.17184e-05	0.000100359
ENSG00000043093.13|mRNA|DCUN1D1|ENSG00000043093.13|ENSG00000043093.13|0|8412	0.598898	7.81844	26.8602	4.23486e-07	1.4598e-06
ENSG00000043143.20|mRNA|JADE2|ENSG00000043143.20|ENSG00000043143.20|0|9877	-0.629914	4.79784	33.7383	1.73536e-08	7.68126e-08
ENSG00000043462.11|mRNA|LCP2|ENSG00000043462.11|ENSG00000043462.11|0|7244	-0.444589	8.31055	32.6473	2.86298e-08	1.21675e-07
ENSG00000043514.15|mRNA|TRIT1|ENSG00000043514.15|ENSG00000043514.15|0|2663	-0.0427941	3.63105	0.134815	0.713773	0.748367
ENSG00000044090.8|mRNA|CUL7|ENSG00000044090.8|ENSG00000044090.8|0|5628	-0.332006	2.47776	1.8383	0.17626	0.211294
ENSG00000044115.20|mRNA|CTNNA1|ENSG00000044115.20|ENSG00000044115.20|0|8830	0.326909	7.37021	10.075	0.00167334	0.00296323
ENSG00000044446.11|mRNA|PHKA2|ENSG00000044446.11|ENSG00000044446.11|0|9029	0.0195821	3.78135	0.0225631	0.880709	0.900161
ENSG00000044459.14|mRNA|CNTLN|ENSG00000044459.14|ENSG00000044459.14|0|11064	1.24638	8.73844	54.6283	1.74814e-12	2.02713e-11
ENSG00000044574.7|mRNA|HSPA5|ENSG00000044574.7|ENSG00000044574.7|0|3908	0.0223208	4.16934	0.0087002	0.925753	0.939125
ENSG00000046647.13|mRNA|GEMIN8|ENSG00000046647.13|ENSG00000046647.13|0|2424	-0.519609	2.39943	9.0678	0.00284287	0.0048113
ENSG00000046651.14|mRNA|OFD1|ENSG00000046651.14|ENSG00000046651.14|0|5172	0.661967	7.1914	43.5855	2.07877e-10	1.38388e-09
ENSG00000046889.18|mRNA|PREX2|ENSG00000046889.18|ENSG00000046889.18|0|12058	-1.54036	4.68751	88.2467	2.29388e-18	1.29241e-16
ENSG00000047056.14|mRNA|WDR37|ENSG00000047056.14|ENSG00000047056.14|0|5656	0.178788	6.00129	3.55496	0.0604198	0.0792238
ENSG00000047188.15|mRNA|YTHDC2|ENSG00000047188.15|ENSG00000047188.15|0|10816	0.503791	5.86984	18.8801	1.95927e-05	5.00353e-05
ENSG00000047230.14|mRNA|CTPS2|ENSG00000047230.14|ENSG00000047230.14|0|5510	0.655775	4.66035	24.2805	1.43898e-06	4.4971e-06
ENSG00000047249.17|mRNA|ATP6V1H|ENSG00000047249.17|ENSG00000047249.17|0|5090	-0.189981	4.47622	3.3649	0.0676779	0.08792
ENSG00000047315.15|mRNA|POLR2B|ENSG00000047315.15|ENSG00000047315.15|0|5901	-0.467905	5.98527	20.8217	7.59824e-06	2.08915e-05
ENSG00000047346.12|mRNA|FAM214A|ENSG00000047346.12|ENSG00000047346.12|0|9832	0.733583	5.44989	30.6435	7.22286e-08	2.85776e-07
ENSG00000047365.11|mRNA|ARAP2|ENSG00000047365.11|ENSG00000047365.11|0|12428	-0.694127	5.47508	18.548	2.30618e-05	5.81282e-05
ENSG00000047410.13|mRNA|TPR|ENSG00000047410.13|ENSG00000047410.13|0|12350	-0.60269	7.80745	34.9169	1.01286e-08	4.7013e-08
ENSG00000047457.13|mRNA|CP|ENSG00000047457.13|ENSG00000047457.13|0|7296	3.48103	3.34052	31.8222	4.18701e-08	1.72505e-07
ENSG00000047578.12|mRNA|KIAA0556|ENSG00000047578.12|ENSG00000047578.12|0|9784	-0.145025	3.45791	0.710709	0.39994	0.444662
ENSG00000047579.19|mRNA|DTNBP1|ENSG00000047579.19|ENSG00000047579.19|0|3052	-0.858142	4.19846	34.7009	1.11774e-08	5.14144e-08
ENSG00000047597.5|mRNA|XK|ENSG00000047597.5|ENSG00000047597.5|0|5206	1.38079	6.51904	57.2307	5.8177e-13	7.7253e-12
ENSG00000047617.14|mRNA|ANO2|ENSG00000047617.14|ENSG00000047617.14|0|6255	0.289832	6.33756	6.06039	0.0144374	0.0212873
ENSG00000047621.11|mRNA|C12orf4|ENSG00000047621.11|ENSG00000047621.11|0|4939	-0.420204	3.87832	14.5485	0.000168635	0.000362282
ENSG00000047634.14|mRNA|SCML1|ENSG00000047634.14|ENSG00000047634.14|0|5497	0.639896	3.13582	12.7388	0.000422356	0.000839444
ENSG00000047644.18|mRNA|WWC3|ENSG00000047644.18|ENSG00000047644.18|0|7114	0.379794	6.39734	12.74	0.000422083	0.000838992
ENSG00000047648.21|mRNA|ARHGAP6|ENSG00000047648.21|ENSG00000047648.21|0|7885	1.4293	8.00285	46.221	6.53522e-11	4.94293e-10
ENSG00000047849.21|mRNA|MAP4|ENSG00000047849.21|ENSG00000047849.21|0|14943	-1.08293	6.27271	70.6482	2.31092e-15	6.08065e-14
ENSG00000047932.13|mRNA|GOPC|ENSG00000047932.13|ENSG00000047932.13|0|4628	-0.965591	3.50864	39.5881	1.22824e-09	6.83709e-09
ENSG00000048028.11|mRNA|USP28|ENSG00000048028.11|ENSG00000048028.11|0|5719	-1.1098	4.69717	64.3354	3.02478e-14	5.92044e-13
ENSG00000048052.21|mRNA|HDAC9|ENSG00000048052.21|ENSG00000048052.21|0|16827	0.519867	6.99567	19.0752	1.7806e-05	4.58719e-05
ENSG00000048140.17|mRNA|TSPAN17|ENSG00000048140.17|ENSG00000048140.17|0|5215	-1.45731	2.21308	52.2763	4.76444e-12	4.91094e-11
ENSG00000048162.20|mRNA|NOP16|ENSG00000048162.20|ENSG00000048162.20|0|2862	-1.19229	3.66533	49.7632	1.40319e-11	1.25896e-10
ENSG00000048392.11|mRNA|RRM2B|ENSG00000048392.11|ENSG00000048392.11|0|5548	-0.75869	3.97643	46.779	5.12218e-11	3.97672e-10
ENSG00000048405.9|mRNA|ZNF800|ENSG00000048405.9|ENSG00000048405.9|0|5793	-0.171549	4.49218	2.79422	0.09574	0.120727
ENSG00000048471.13|mRNA|SNX29|ENSG00000048471.13|ENSG00000048471.13|0|11298	0.145305	5.64637	1.95105	0.163598	0.197241
ENSG00000048544.5|mRNA|MRPS10|ENSG00000048544.5|ENSG00000048544.5|0|2110	-0.192955	4.30678	2.38571	0.123597	0.15245
ENSG00000048649.13|mRNA|RSF1|ENSG00000048649.13|ENSG00000048649.13|0|15740	0.401428	7.95349	22.8176	2.89863e-06	8.55858e-06
ENSG00000048707.13|mRNA|VPS13D|ENSG00000048707.13|ENSG00000048707.13|0|20023	0.448012	6.05511	14.0924	0.000212285	0.000446722
ENSG00000048740.18|mRNA|CELF2|ENSG00000048740.18|ENSG00000048740.18|0|10978	0.970089	8.10033	50.3917	1.07009e-11	9.94083e-11
ENSG00000048828.16|mRNA|FAM120A|ENSG00000048828.16|ENSG00000048828.16|0|7204	0.202764	7.45108	5.27897	0.0223341	0.0317704
ENSG00000048991.16|mRNA|R3HDM1|ENSG00000048991.16|ENSG00000048991.16|0|7898	0.587422	8.27089	28.2694	2.18403e-07	7.91433e-07
ENSG00000049089.13|mRNA|COL9A2|ENSG00000049089.13|ENSG00000049089.13|0|4151	-0.535868	2.02831	4.21672	0.0409713	0.0554693
ENSG00000049130.14|mRNA|KITLG|ENSG00000049130.14|ENSG00000049130.14|0|6030	1.10613	4.81568	38.0684	2.42992e-09	1.27875e-08
ENSG00000049167.13|mRNA|ERCC8|ENSG00000049167.13|ENSG00000049167.13|0|4847	-0.372952	2.8023	5.52941	0.0194038	0.027961
ENSG00000049192.14|mRNA|ADAMTS6|ENSG00000049192.14|ENSG00000049192.14|0|8567	1.34061	6.89265	55.4662	1.22544e-12	1.49124e-11
ENSG00000049245.12|mRNA|VAMP3|ENSG00000049245.12|ENSG00000049245.12|0|2760	0.287428	6.64325	8.16811	0.00458863	0.00744187
ENSG00000049246.14|mRNA|PER3|ENSG00000049246.14|ENSG00000049246.14|0|8099	-0.917594	3.94525	40.9921	6.56184e-10	3.90441e-09
ENSG00000049247.13|mRNA|UTS2|ENSG00000049247.13|ENSG00000049247.13|0|1791	-1.42734	3.13714	45.1946	1.02427e-10	7.34327e-10
ENSG00000049323.15|mRNA|LTBP1|ENSG00000049323.15|ENSG00000049323.15|0|7329	1.42547	9.93321	41.7014	4.78652e-10	2.93294e-09
ENSG00000049449.8|mRNA|RCN1|ENSG00000049449.8|ENSG00000049449.8|0|7225	-0.856558	2.62627	16.7093	5.72055e-05	0.000134042
ENSG00000049541.10|mRNA|RFC2|ENSG00000049541.10|ENSG00000049541.10|0|2211	-0.323725	3.97697	9.14609	0.00272755	0.00463184
ENSG00000049618.22|mRNA|ARID1B|ENSG00000049618.22|ENSG00000049618.22|0|44058	0.214988	6.56586	5.39839	0.0208832	0.0298898
ENSG00000049656.13|mRNA|CLPTM1L|ENSG00000049656.13|ENSG00000049656.13|0|6557	0.0952405	4.75295	0.711644	0.39963	0.444368
ENSG00000049759.17|mRNA|NEDD4L|ENSG00000049759.17|ENSG00000049759.17|0|17455	-0.241583	3.88519	3.97299	0.0472214	0.0632441
ENSG00000049769.12|mRNA|PPP1R3F|ENSG00000049769.12|ENSG00000049769.12|0|4173	-0.226551	1.97947	1.25648	0.263295	0.303708
ENSG00000049860.13|mRNA|HEXB|ENSG00000049860.13|ENSG00000049860.13|0|5067	-0.413989	3.75356	6.48943	0.0113954	0.0171469
ENSG00000049883.14|mRNA|PTCD2|ENSG00000049883.14|ENSG00000049883.14|0|12115	0.353407	1.97797	3.63032	0.0577768	0.0760432
ENSG00000050130.17|mRNA|JKAMP|ENSG00000050130.17|ENSG00000050130.17|0|4350	1.27906	5.65965	49.7453	1.41407e-11	1.26644e-10
ENSG00000050393.11|mRNA|MCUR1|ENSG00000050393.11|ENSG00000050393.11|0|6057	1.52268	9.86992	69.2478	4.07072e-15	1.01998e-13
ENSG00000050405.13|mRNA|LIMA1|ENSG00000050405.13|ENSG00000050405.13|0|6317	-1.05435	3.78167	63.0142	5.21516e-14	9.56913e-13
ENSG00000050426.15|mRNA|LETMD1|ENSG00000050426.15|ENSG00000050426.15|0|6032	-0.380885	3.67195	11.2657	0.000900593	0.00167528
ENSG00000050438.16|mRNA|SLC4A8|ENSG00000050438.16|ENSG00000050438.16|0|17980	0.0615711	1.86981	0.0481679	0.826445	0.851638
ENSG00000050628.20|mRNA|PTGER3|ENSG00000050628.20|ENSG00000050628.20|0|9653	1.10162	2.78913	24.3001	1.42559e-06	4.46224e-06
ENSG00000050730.15|mRNA|TNIP3|ENSG00000050730.15|ENSG00000050730.15|0|3768	0.0739245	2.25669	0.128967	0.719781	0.753993
ENSG00000050748.17|mRNA|MAPK9|ENSG00000050748.17|ENSG00000050748.17|0|8955	0.152667	6.35545	3.43069	0.0650649	0.0847794
ENSG00000051009.10|mRNA|FAM160A2|ENSG00000051009.10|ENSG00000051009.10|0|4736	-0.504401	2.03889	4.5975	0.0328935	0.0453174
ENSG00000051108.14|mRNA|HERPUD1|ENSG00000051108.14|ENSG00000051108.14|0|5155	-0.17332	4.61428	0.545521	0.460782	0.5056
ENSG00000051128.18|mRNA|HOMER3|ENSG00000051128.18|ENSG00000051128.18|0|3422	-1.52355	3.6733	54.1048	2.18371e-12	2.45513e-11
ENSG00000051341.13|mRNA|POLQ|ENSG00000051341.13|ENSG00000051341.13|0|9400	0.839473	4.63476	30.0497	9.51593e-08	3.68821e-07
ENSG00000051382.8|mRNA|PIK3CB|ENSG00000051382.8|ENSG00000051382.8|0|7850	1.23857	8.05309	49.1306	1.8443e-11	1.59864e-10
ENSG00000051523.10|mRNA|CYBA|ENSG00000051523.10|ENSG00000051523.10|0|3357	-0.744924	5.98474	19.4157	1.50724e-05	3.93326e-05
ENSG00000051596.9|mRNA|THOC3|ENSG00000051596.9|ENSG00000051596.9|0|3453	-1.21339	3.37117	60.4014	1.54193e-13	2.49018e-12
ENSG00000051620.10|mRNA|HEBP2|ENSG00000051620.10|ENSG00000051620.10|0|10356	-1.04051	5.15164	52.2023	4.91778e-12	5.04813e-11
ENSG00000051825.14|mRNA|MPHOSPH9|ENSG00000051825.14|ENSG00000051825.14|0|10304	0.632914	6.76121	38.9349	1.64601e-09	8.94054e-09
ENSG00000052126.14|mRNA|PLEKHA5|ENSG00000052126.14|ENSG00000052126.14|0|12558	0.95161	5.9233	46.1384	6.77548e-11	5.09951e-10
ENSG00000052723.11|mRNA|SIKE1|ENSG00000052723.11|ENSG00000052723.11|0|5894	-0.994638	4.04548	57.1336	6.0606e-13	7.99462e-12
ENSG00000052749.13|mRNA|RRP12|ENSG00000052749.13|ENSG00000052749.13|0|8529	-0.910236	4.25009	31.3328	5.24914e-08	2.1275e-07
ENSG00000052795.12|mRNA|FNIP2|ENSG00000052795.12|ENSG00000052795.12|0|10868	-0.624289	3.40976	17.9041	3.1665e-05	7.77111e-05
ENSG00000052841.14|mRNA|TTC17|ENSG00000052841.14|ENSG00000052841.14|0|11284	0.325392	5.29183	4.38243	0.0372253	0.0508011
ENSG00000053108.16|mRNA|FSTL4|ENSG00000053108.16|ENSG00000053108.16|0|6734	0.880479	3.08866	16.9949	4.96433e-05	0.000117677
ENSG00000053254.15|mRNA|FOXN3|ENSG00000053254.15|ENSG00000053254.15|0|11033	-0.365714	5.00453	12.7021	0.000430339	0.000854551
ENSG00000053371.12|mRNA|AKR7A2|ENSG00000053371.12|ENSG00000053371.12|0|1781	0.356658	4.97534	5.39532	0.0209192	0.0299393
ENSG00000053372.4|mRNA|MRTO4|ENSG00000053372.4|ENSG00000053372.4|0|2822	-1.36135	2.83138	51.3696	7.02752e-12	6.87555e-11
ENSG00000053501.12|mRNA|USE1|ENSG00000053501.12|ENSG00000053501.12|0|2431	-1.36511	4.19694	90.1621	1.10391e-18	6.75384e-17
ENSG00000053524.12|mRNA|MCF2L2|ENSG00000053524.12|ENSG00000053524.12|0|20568	1.0585	5.54044	31.7832	4.26312e-08	1.7546e-07
ENSG00000053770.11|mRNA|AP5M1|ENSG00000053770.11|ENSG00000053770.11|0|13034	0.030007	4.54439	0.0627577	0.802376	0.829793
ENSG00000053900.10|mRNA|ANAPC4|ENSG00000053900.10|ENSG00000053900.10|0|7494	-0.389772	4.36218	9.69917	0.00203783	0.00354325
ENSG00000053918.15|mRNA|KCNQ1|ENSG00000053918.15|ENSG00000053918.15|0|3971	-0.863108	2.68911	14.741	0.000153049	0.0003318
ENSG00000054116.11|mRNA|TRAPPC3|ENSG00000054116.11|ENSG00000054116.11|0|3527	-0.763233	3.59787	26.6074	4.77096e-07	1.62996e-06
ENSG00000054118.13|mRNA|THRAP3|ENSG00000054118.13|ENSG00000054118.13|0|4736	-0.499517	7.25565	25.6904	7.36101e-07	2.42911e-06
ENSG00000054148.17|mRNA|PHPT1|ENSG00000054148.17|ENSG00000054148.17|0|1612	-1.22056	3.5942	52.7941	3.81815e-12	4.03353e-11
ENSG00000054219.10|mRNA|LY75|ENSG00000054219.10|ENSG00000054219.10|0|8798	-0.0619761	3.88202	0.087103	0.768115	0.798877
ENSG00000054267.21|mRNA|ARID4B|ENSG00000054267.21|ENSG00000054267.21|0|11073	-0.194652	8.09083	5.32915	0.021712	0.0309606
ENSG00000054277.13|mRNA|OPN3|ENSG00000054277.13|ENSG00000054277.13|0|3716	-0.355824	2.84291	2.59704	0.108208	0.135125
ENSG00000054282.15|mRNA|SDCCAG8|ENSG00000054282.15|ENSG00000054282.15|0|5322	0.533434	7.49618	26.1996	5.78459e-07	1.94592e-06
ENSG00000054356.13|mRNA|PTPRN|ENSG00000054356.13|ENSG00000054356.13|0|8261	1.43471	3.21404	35.6411	7.2848e-09	3.47597e-08
ENSG00000054392.12|mRNA|HHAT|ENSG00000054392.12|ENSG00000054392.12|0|6641	1.16591	1.89114	8.24488	0.004404	0.00716283
ENSG00000054523.17|mRNA|KIF1B|ENSG00000054523.17|ENSG00000054523.17|0|17720	0.546937	6.12607	29.202	1.41223e-07	5.28856e-07
ENSG00000054611.13|mRNA|TBC1D22A|ENSG00000054611.13|ENSG00000054611.13|0|5315	-0.12702	5.70555	2.70199	0.101364	0.127111
ENSG00000054654.16|mRNA|SYNE2|ENSG00000054654.16|ENSG00000054654.16|0|31374	-0.527457	7.54228	15.3448	0.000113012	0.000250476
ENSG00000054793.13|mRNA|ATP9A|ENSG00000054793.13|ENSG00000054793.13|0|8317	0.442581	2.98492	7.67259	0.00598763	0.0094999
ENSG00000054965.10|mRNA|FAM168A|ENSG00000054965.10|ENSG00000054965.10|0|7887	-0.740203	3.74087	37.3028	3.43167e-09	1.75274e-08
ENSG00000054967.12|mRNA|RELT|ENSG00000054967.12|ENSG00000054967.12|0|6322	0.125887	3.11329	0.179425	0.672198	0.709491
ENSG00000054983.16|mRNA|GALC|ENSG00000054983.16|ENSG00000054983.16|0|6825	-0.203861	3.06539	1.77642	0.18369	0.219344
ENSG00000055044.10|mRNA|NOP58|ENSG00000055044.10|ENSG00000055044.10|0|3299	-0.405778	6.13083	26.3608	5.36016e-07	1.81017e-06
ENSG00000055070.16|mRNA|SZRD1|ENSG00000055070.16|ENSG00000055070.16|0|4747	0.0803496	6.27468	0.932545	0.335049	0.378401
ENSG00000055130.15|mRNA|CUL1|ENSG00000055130.15|ENSG00000055130.15|0|3548	-0.358515	5.83484	18.6547	2.18846e-05	5.54482e-05
ENSG00000055147.18|mRNA|FAM114A2|ENSG00000055147.18|ENSG00000055147.18|0|6543	-0.154752	5.58893	3.2067	0.0744347	0.0959788
ENSG00000055163.19|mRNA|CYFIP2|ENSG00000055163.19|ENSG00000055163.19|0|10498	-1.01616	7.28955	59.7193	2.04941e-13	3.18344e-12
ENSG00000055208.18|mRNA|TAB2|ENSG00000055208.18|ENSG00000055208.18|0|6010	0.712618	7.27402	41.7224	4.74205e-10	2.91016e-09
ENSG00000055211.12|mRNA|GINM1|ENSG00000055211.12|ENSG00000055211.12|0|2248	0.345241	4.41118	10.0294	0.00171369	0.00302821
ENSG00000055332.16|mRNA|EIF2AK2|ENSG00000055332.16|ENSG00000055332.16|0|10753	-0.244394	6.3799	5.16842	0.0237708	0.0336391
ENSG00000055483.19|mRNA|USP36|ENSG00000055483.19|ENSG00000055483.19|0|9235	-0.705825	4.31745	18.3368	2.55863e-05	6.38538e-05
ENSG00000055609.17|mRNA|KMT2C|ENSG00000055609.17|ENSG00000055609.17|0|20114	0.949802	9.43615	57.0039	6.40064e-13	8.36571e-12
ENSG00000055917.15|mRNA|PUM2|ENSG00000055917.15|ENSG00000055917.15|0|6978	0.171775	7.31018	3.99541	0.0466065	0.0625086
ENSG00000055950.16|mRNA|MRPL43|ENSG00000055950.16|ENSG00000055950.16|0|3573	-1.21157	3.18021	54.1658	2.12783e-12	2.40315e-11
ENSG00000055955.15|mRNA|ITIH4|ENSG00000055955.15|ENSG00000055955.15|0|5462	1.15059	2.27605	9.38479	0.00240456	0.00412089
ENSG00000056050.6|mRNA|HPF1|ENSG00000056050.6|ENSG00000056050.6|0|1436	-0.88931	3.76293	36.5127	4.90559e-09	2.42724e-08
ENSG00000056097.15|mRNA|ZFR|ENSG00000056097.15|ENSG00000056097.15|0|6792	0.0937375	7.55894	1.58892	0.208547	0.24637
ENSG00000056277.15|mRNA|ZNF280C|ENSG00000056277.15|ENSG00000056277.15|0|4634	-0.230192	3.12243	2.35854	0.125746	0.154873
ENSG00000056558.10|mRNA|TRAF1|ENSG00000056558.10|ENSG00000056558.10|0|6449	-0.4001	2.23103	2.56237	0.110581	0.137846
ENSG00000056586.15|mRNA|RC3H2|ENSG00000056586.15|ENSG00000056586.15|0|11545	1.0791	8.30928	62.9301	5.3997e-14	9.84433e-13
ENSG00000056972.18|mRNA|TRAF3IP2|ENSG00000056972.18|ENSG00000056972.18|0|6553	-1.39129	2.57091	56.9452	6.56108e-13	8.53625e-12
ENSG00000057019.15|mRNA|DCBLD2|ENSG00000057019.15|ENSG00000057019.15|0|11274	0.95611	3.58715	26.9763	4.00931e-07	1.38805e-06
ENSG00000057252.12|mRNA|SOAT1|ENSG00000057252.12|ENSG00000057252.12|0|7005	0.0294641	4.56096	0.0729162	0.787339	0.816184
ENSG00000057294.14|mRNA|PKP2|ENSG00000057294.14|ENSG00000057294.14|0|7043	0.797074	3.30555	16.9391	5.1037e-05	0.000120708
ENSG00000057608.16|mRNA|GDI2|ENSG00000057608.16|ENSG00000057608.16|0|4033	-0.492086	8.53547	41.2808	5.77065e-10	3.46778e-09
ENSG00000057657.15|mRNA|PRDM1|ENSG00000057657.15|ENSG00000057657.15|0|6369	-0.69224	3.54583	16.552	6.18559e-05	0.000143756
ENSG00000057663.14|mRNA|ATG5|ENSG00000057663.14|ENSG00000057663.14|0|5517	-0.198111	5.03371	4.44219	0.0359646	0.0492222
ENSG00000057704.12|mRNA|TMCC3|ENSG00000057704.12|ENSG00000057704.12|0|6515	-0.809811	2.24262	14.1178	0.000209578	0.000441583
ENSG00000057757.9|mRNA|PITHD1|ENSG00000057757.9|ENSG00000057757.9|0|2186	-0.291439	5.40137	6.2838	0.0127608	0.0190305
ENSG00000057935.13|mRNA|MTA3|ENSG00000057935.13|ENSG00000057935.13|0|10580	0.169495	3.8897	1.87344	0.878322	0.897952
ENSG00000058056.8|mRNA|USP13|ENSG00000058056.8|ENSG00000058056.8|0|8440	-0.338079	3.66564	7.06362	0.00832595	0.0128533
ENSG00000058063.15|mRNA|ATP11B|ENSG00000058063.15|ENSG00000058063.15|0|9196	0.906114	7.15398	51.6773	6.15838e-12	6.13427e-11
ENSG00000058091.16|mRNA|CDK14|ENSG00000058091.16|ENSG00000058091.16|0|6841	0.535052	6.22358	23.17	2.44759e-06	7.32459e-06
ENSG00000058262.9|mRNA|SEC61A1|ENSG00000058262.9|ENSG00000058262.9|0|4697	0.614898	4.64212	16.1572	7.52947e-05	0.000172338
ENSG00000058272.16|mRNA|PPP1R12A|ENSG00000058272.16|ENSG00000058272.16|0|11815	0.523863	8.78121	39.327	1.38061e-09	7.61511e-09
ENSG00000058453.16|mRNA|CROCC|ENSG00000058453.16|ENSG00000058453.16|0|8871	-0.157584	3.76599	0.539036	0.463457	0.508232
ENSG00000058600.15|mRNA|POLR3E|ENSG00000058600.15|ENSG00000058600.15|0|9488	-0.678199	4.18081	25.227	9.17122e-07	2.97286e-06
ENSG00000058668.14|mRNA|ATP2B4|ENSG00000058668.14|ENSG00000058668.14|0|9721	-0.305383	4.55324	2.3513	0.126326	0.155539
ENSG00000058673.16|mRNA|ZC3H11A|ENSG00000058673.16|ENSG00000058673.16|0|12798	0.531425	7.33951	28.9736	1.57112e-07	5.8354e-07
ENSG00000058729.10|mRNA|RIOK2|ENSG00000058729.10|ENSG00000058729.10|0|5502	-1.2085	3.61616	56.5607	7.71579e-13	9.83961e-12
ENSG00000058799.14|mRNA|YIPF1|ENSG00000058799.14|ENSG00000058799.14|0|2072	-0.422516	3.64775	11.9606	0.000629321	0.00120783
ENSG00000058804.11|mRNA|NDC1|ENSG00000058804.11|ENSG00000058804.11|0|5135	0.448516	4.20235	11.6655	0.000732592	0.00138603
ENSG00000058866.14|mRNA|DGKG|ENSG00000058866.14|ENSG00000058866.14|0|10978	1.1085	6.46203	38.9864	1.60839e-09	8.75525e-09
ENSG00000059122.16|mRNA|FLYWCH1|ENSG00000059122.16|ENSG00000059122.16|0|8419	-0.534899	2.20973	6.89302	0.00913674	0.0140093
ENSG00000059145.18|mRNA|UNKL|ENSG00000059145.18|ENSG00000059145.18|0|7494	0.346419	3.12791	4.49521	0.0348836	0.047851
ENSG00000059377.16|mRNA|TBXAS1|ENSG00000059377.16|ENSG00000059377.16|0|6200	1.0976	7.22928	71.7082	1.50791e-15	4.17132e-14
ENSG00000059378.12|mRNA|PARP12|ENSG00000059378.12|ENSG00000059378.12|0|6285	-0.829284	4.09752	32.4286	3.16613e-08	1.33647e-07
ENSG00000059573.8|mRNA|ALDH18A1|ENSG00000059573.8|ENSG00000059573.8|0|3766	-0.778524	2.61346	14.9418	0.000138348	0.000302129
ENSG00000059588.9|mRNA|TARBP1|ENSG00000059588.9|ENSG00000059588.9|0|7743	0.297239	4.25773	1.74778	0.187252	0.22319
ENSG00000059691.11|mRNA|GATB|ENSG00000059691.11|ENSG00000059691.11|0|11757	-0.972058	2.27809	25.5823	7.74809e-07	2.54883e-06
ENSG00000059728.10|mRNA|MXD1|ENSG00000059728.10|ENSG00000059728.10|0|6351	-0.0826921	6.51037	0.685428	0.40844	0.453128
ENSG00000059758.7|mRNA|CDK17|ENSG00000059758.7|ENSG00000059758.7|0|6547	0.648128	7.28431	36.5431	4.83833e-09	2.39693e-08
ENSG00000059804.15|mRNA|SLC2A3|ENSG00000059804.15|ENSG00000059804.15|0|6159	1.24203	7.60271	46.2243	6.5258e-11	4.93955e-10
ENSG00000060069.16|mRNA|CTDP1|ENSG00000060069.16|ENSG00000060069.16|0|7415	-0.534174	4.56855	17.3116	4.24341e-05	0.000101921
ENSG00000060138.12|mRNA|YBX3|ENSG00000060138.12|ENSG00000060138.12|0|8610	-0.0755911	9.06745	0.562447	0.453916	0.498615
ENSG00000060237.16|mRNA|WNK1|ENSG00000060237.16|ENSG00000060237.16|0|14370	-0.055805	8.43338	0.332581	0.564614	0.606747
ENSG00000060339.13|mRNA|CCAR1|ENSG00000060339.13|ENSG00000060339.13|0|6059	0.581895	8.33535	32.9809	2.45608e-08	1.05734e-07
ENSG00000060491.16|mRNA|OGFR|ENSG00000060491.16|ENSG00000060491.16|0|4702	-1.21657	3.98823	69.4724	3.71679e-15	9.38372e-14
ENSG00000060558.3|mRNA|GNA15|ENSG00000060558.3|ENSG00000060558.3|0|2613	0.94022	5.81755	40.4035	8.53081e-10	4.92039e-09
ENSG00000060688.12|mRNA|SNRNP40|ENSG00000060688.12|ENSG00000060688.12|0|3881	-0.805144	4.8447	67.6847	7.68029e-15	1.77707e-13
ENSG00000060749.14|mRNA|QSER1|ENSG00000060749.14|ENSG00000060749.14|0|10537	-0.164655	4.13068	1.9551	0.163162	0.196788
ENSG00000060762.18|mRNA|MPC1|ENSG00000060762.18|ENSG00000060762.18|0|1546	0.0866597	5.14305	0.691125	0.406502	0.451229
ENSG00000060971.17|mRNA|ACAA1|ENSG00000060971.17|ENSG00000060971.17|0|7106	-0.75238	4.3541	20.2534	1.00159e-05	2.69229e-05
ENSG00000060982.14|mRNA|BCAT1|ENSG00000060982.14|ENSG00000060982.14|0|11775	0.156762	3.57201	1.46542	0.227107	0.266043
ENSG00000061273.17|mRNA|HDAC7|ENSG00000061273.17|ENSG00000061273.17|0|9928	-0.924651	4.51732	43.3269	2.3301e-10	1.53177e-09
ENSG00000061676.14|mRNA|NCKAP1|ENSG00000061676.14|ENSG00000061676.14|0|22520	1.20502	8.2067	47.0243	4.60269e-11	3.60851e-10
ENSG00000061794.12|mRNA|MRPS35|ENSG00000061794.12|ENSG00000061794.12|0|1979	0.0858798	5.96511	0.733836	0.392387	0.436947
ENSG00000061918.12|mRNA|GUCY1B3|ENSG00000061918.12|ENSG00000061918.12|0|3724	1.53744	9.42629	58.1313	3.98427e-13	5.59228e-12
ENSG00000061936.9|mRNA|SFSWAP|ENSG00000061936.9|ENSG00000061936.9|0|10157	-0.656661	5.18874	20.678	8.14723e-06	2.2272e-05
ENSG00000061938.17|mRNA|TNK2|ENSG00000061938.17|ENSG00000061938.17|0|12015	0.180632	4.83498	1.73358	0.189049	0.225136
ENSG00000061987.15|mRNA|MON2|ENSG00000061987.15|ENSG00000061987.15|0|16017	0.354286	5.24201	8.20998	0.00448698	0.00728769
ENSG00000062194.15|mRNA|GPBP1|ENSG00000062194.15|ENSG00000062194.15|0|6472	0.442693	7.64416	21.6377	5.11785e-06	1.45283e-05
ENSG00000062485.18|mRNA|CS|ENSG00000062485.18|ENSG00000062485.18|0|6402	-1.02485	4.95849	74.2494	5.44912e-16	1.63433e-14
ENSG00000062524.15|mRNA|LTK|ENSG00000062524.15|ENSG00000062524.15|0|3490	1.18044	2.7767	7.34124	0.00716138	0.0111965
ENSG00000062582.13|mRNA|MRPS24|ENSG00000062582.13|ENSG00000062582.13|0|2613	-1.34458	2.87821	56.6169	7.53507e-13	9.63378e-12
ENSG00000062598.17|mRNA|ELMO2|ENSG00000062598.17|ENSG00000062598.17|0|6598	0.068476	5.15975	0.524924	0.469363	0.514083
ENSG00000062650.18|mRNA|WAPL|ENSG00000062650.18|ENSG00000062650.18|0|7228	0.0863589	6.85569	1.05345	0.384229	0.428508
ENSG00000062716.12|mRNA|VMP1|ENSG00000062716.12|ENSG00000062716.12|0|6916	-0.186202	6.64115	5.01135	0.0259803	0.0364451
ENSG00000062725.9|mRNA|APPBP2|ENSG00000062725.9|ENSG00000062725.9|0|9876	0.0134529	4.35849	0.0146768	0.903662	0.920507
ENSG00000062822.12|mRNA|POLD1|ENSG00000062822.12|ENSG00000062822.12|0|4858	-0.481912	3.39677	8.77417	0.00332172	0.00554407
ENSG00000063046.17|mRNA|EIF4B|ENSG00000063046.17|ENSG00000063046.17|0|6146	-1.26377	9.01702	142.059	1.08324e-26	2.27424e-24
ENSG00000063169.10|mRNA|BICRA|ENSG00000063169.10|ENSG00000063169.10|0|7507	-0.81752	2.39491	18.2523	2.66731e-05	6.63667e-05
ENSG00000063177.12|mRNA|RPL18|ENSG00000063177.12|ENSG00000063177.12|0|4209	-1.60686	8.92692	169.582	1.55434e-30	6.20026e-28
ENSG00000063180.8|mRNA|CA11|ENSG00000063180.8|ENSG00000063180.8|0|2075	-2.12563	2.28511	96.5235	1.00075e-19	7.31137e-18
ENSG00000063241.7|mRNA|ISOC2|ENSG00000063241.7|ENSG00000063241.7|0|4408	-1.47661	3.14224	68.6431	5.20211e-15	1.26532e-13
ENSG00000063244.12|mRNA|U2AF2|ENSG00000063244.12|ENSG00000063244.12|0|4115	-0.224873	6.48207	6.88852	0.00915921	0.0140383
ENSG00000063245.14|mRNA|EPN1|ENSG00000063245.14|ENSG00000063245.14|0|17616	-0.367035	5.84001	12.7747	0.00041467	0.000826296
ENSG00000063322.13|mRNA|MED29|ENSG00000063322.13|ENSG00000063322.13|0|3835	-0.974725	4.35968	65.027	2.27648e-14	4.55867e-13
ENSG00000063438.16|mRNA|AHRR|ENSG00000063438.16|ENSG00000063438.16|0|7678	-0.818284	3.58863	42.3151	3.64566e-10	2.29522e-09
ENSG00000063601.16|mRNA|MTMR1|ENSG00000063601.16|ENSG00000063601.16|0|6323	-0.542515	4.69018	14.2262	0.000198414	0.000419702
ENSG00000063854.12|mRNA|HAGH|ENSG00000063854.12|ENSG00000063854.12|0|5975	-1.16966	5.25136	65.2277	2.09648e-14	4.26242e-13
ENSG00000063978.15|mRNA|RNF4|ENSG00000063978.15|ENSG00000063978.15|0|7270	-0.509073	5.55515	31.006	6.10595e-08	2.44397e-07
ENSG00000064012.21|mRNA|CASP8|ENSG00000064012.21|ENSG00000064012.21|0|7243	-0.78628	5.16916	33.481	1.9525e-08	8.55883e-08
ENSG00000064042.17|mRNA|LIMCH1|ENSG00000064042.17|ENSG00000064042.17|0|10862	-1.70009	4.8809	92.8446	3.99024e-19	2.66171e-17
ENSG00000064102.14|mRNA|INTS13|ENSG00000064102.14|ENSG00000064102.14|0|3345	-0.314412	4.80836	10.195	0.00157151	0.0028003
ENSG00000064115.10|mRNA|TM7SF3|ENSG00000064115.10|ENSG00000064115.10|0|3888	0.824528	5.63198	32.8794	2.57329e-08	1.10209e-07
ENSG00000064201.15|mRNA|TSPAN32|ENSG00000064201.15|ENSG00000064201.15|0|3793	1.11026	3.35308	34.1027	1.46882e-08	6.5996e-08
ENSG00000064225.12|mRNA|ST3GAL6|ENSG00000064225.12|ENSG00000064225.12|0|6288	1.03583	4.84854	45.2075	1.01852e-10	7.31526e-10
ENSG00000064313.11|mRNA|TAF2|ENSG00000064313.11|ENSG00000064313.11|0|6547	0.330702	5.81576	9.44607	0.00232813	0.00400091
ENSG00000064393.15|mRNA|HIPK2|ENSG00000064393.15|ENSG00000064393.15|0|15402	0.890603	8.26898	48.7343	2.18947e-11	1.8654e-10
ENSG00000064419.13|mRNA|TNPO3|ENSG00000064419.13|ENSG00000064419.13|0|4676	0.0791025	5.92823	0.996699	0.318986	0.361796
ENSG00000064489.22|mRNA|BORCS8-MEF2B|ENSG00000064489.22|ENSG00000064489.22|0|1931	-0.582848	3.22916	14.7773	0.000150281	0.00032626
ENSG00000064490.13|mRNA|RFXANK|ENSG00000064490.13|ENSG00000064490.13|0|2503	-1.21193	3.70057	58.8737	2.91863e-13	4.2961e-12
ENSG00000064601.16|mRNA|CTSA|ENSG00000064601.16|ENSG00000064601.16|0|5856	1.48929	10.6359	48.6559	2.2652e-11	1.91844e-10
ENSG00000064607.16|mRNA|SUGP2|ENSG00000064607.16|ENSG00000064607.16|0|8468	0.297975	3.7429	2.53732	0.11233	0.13979
ENSG00000064651.13|mRNA|SLC12A2|ENSG00000064651.13|ENSG00000064651.13|0|10664	0.747846	5.38418	34.9	1.0207e-08	4.7311e-08
ENSG00000064652.10|mRNA|SNX24|ENSG00000064652.10|ENSG00000064652.10|0|3550	1.09359	5.25722	45.5103	8.91912e-11	6.51142e-10
ENSG00000064666.14|mRNA|CNN2|ENSG00000064666.14|ENSG00000064666.14|0|3645	-0.599933	7.60637	46.0545	7.02875e-11	5.2715e-10
ENSG00000064687.12|mRNA|ABCA7|ENSG00000064687.12|ENSG00000064687.12|0|8367	0.68854	4.628	8.17972	0.00456021	0.00740061
ENSG00000064703.11|mRNA|DDX20|ENSG00000064703.11|ENSG00000064703.11|0|6019	-1.02992	3.60771	63.7585	3.83605e-14	7.28666e-13
ENSG00000064726.9|mRNA|BTBD1|ENSG00000064726.9|ENSG00000064726.9|0|4169	0.0801635	5.45504	0.63515	0.426159	0.470795
ENSG00000064763.10|mRNA|FAR2|ENSG00000064763.10|ENSG00000064763.10|0|5411	0.362028	5.38668	7.86943	0.0053858	0.00861978
ENSG00000064886.13|mRNA|CHI3L2|ENSG00000064886.13|ENSG00000064886.13|0|3295	-1.45683	3.44994	66.2573	1.3751e-14	2.9459e-13
ENSG00000064932.15|mRNA|SBNO2|ENSG00000064932.15|ENSG00000064932.15|0|6626	-0.518876	5.49374	18.5853	2.26435e-05	5.71604e-05
ENSG00000064933.17|mRNA|PMS1|ENSG00000064933.17|ENSG00000064933.17|0|5454	0.658626	5.54823	23.8801	1.7422e-06	5.35523e-06
ENSG00000064961.18|mRNA|HMG20B|ENSG00000064961.18|ENSG00000064961.18|0|3857	1.19486	7.33506	78.127	1.17029e-16	4.40405e-15
ENSG00000064989.12|mRNA|CALCRL|ENSG00000064989.12|ENSG00000064989.12|0|6144	-1.75888	3.24425	88.6906	1.93555e-18	1.11252e-16
ENSG00000064995.16|mRNA|TAF11|ENSG00000064995.16|ENSG00000064995.16|0|1580	-0.538138	3.50883	16.5918	6.06452e-05	0.000141222
ENSG00000064999.13|mRNA|ANKS1A|ENSG00000064999.13|ENSG00000064999.13|0|6777	0.107507	4.74205	0.965759	0.326602	0.369614
ENSG00000065000.15|mRNA|AP3D1|ENSG00000065000.15|ENSG00000065000.15|0|8601	-0.463394	7.03782	20.2848	9.86363e-06	2.65493e-05
ENSG00000065029.14|mRNA|ZNF76|ENSG00000065029.14|ENSG00000065029.14|0|6789	-0.469916	3.33777	10.3257	0.00146777	0.00263238
ENSG00000065054.13|mRNA|SLC9A3R2|ENSG00000065054.13|ENSG00000065054.13|0|3550	-1.44294	7.90414	71.3002	1.77696e-15	4.79587e-14
ENSG00000065057.7|mRNA|NTHL1|ENSG00000065057.7|ENSG00000065057.7|0|2430	-1.1101	2.06315	24.8516	1.09626e-06	3.50119e-06
ENSG00000065060.16|mRNA|UHRF1BP1|ENSG00000065060.16|ENSG00000065060.16|0|9908	0.682845	4.95112	25.2053	9.26613e-07	3.0007e-06
ENSG00000065135.10|mRNA|GNAI3|ENSG00000065135.10|ENSG00000065135.10|0|27174	-0.490538	6.46855	41.9034	4.37585e-10	2.70792e-09
ENSG00000065150.18|mRNA|IPO5|ENSG00000065150.18|ENSG00000065150.18|0|9671	-1.07477	6.06549	93.1957	3.49469e-19	2.33898e-17
ENSG00000065154.11|mRNA|OAT|ENSG00000065154.11|ENSG00000065154.11|0|3388	-0.840307	4.3617	41.5043	5.22462e-10	3.17795e-09
ENSG00000065183.15|mRNA|WDR3|ENSG00000065183.15|ENSG00000065183.15|0|10275	-1.09022	4.11351	63.8263	3.73031e-14	7.09934e-13
ENSG00000065243.19|mRNA|PKN2|ENSG00000065243.19|ENSG00000065243.19|0|6897	0.66771	7.37598	35.1371	9.16202e-09	4.2906e-08
ENSG00000065268.10|mRNA|WDR18|ENSG00000065268.10|ENSG00000065268.10|0|2357	-1.13018	3.02241	37.0706	3.81117e-09	1.93027e-08
ENSG00000065308.4|mRNA|TRAM2|ENSG00000065308.4|ENSG00000065308.4|0|6908	0.496902	2.38385	6.03104	0.014674	0.0216091
ENSG00000065328.16|mRNA|MCM10|ENSG00000065328.16|ENSG00000065328.16|0|5454	0.544234	3.75922	10.5611	0.00129826	0.00235077
ENSG00000065357.19|mRNA|DGKA|ENSG00000065357.19|ENSG00000065357.19|0|10215	-0.596668	4.99606	31.3968	5.096e-08	2.06879e-07
ENSG00000065413.18|mRNA|ANKRD44|ENSG00000065413.18|ENSG00000065413.18|0|10839	-0.763405	5.60746	28.3492	2.10383e-07	7.64453e-07
ENSG00000065427.14|mRNA|KARS|ENSG00000065427.14|ENSG00000065427.14|0|4065	-1.13002	6.36082	113.318	2.15807e-22	2.59293e-20
ENSG00000065457.10|mRNA|ADAT1|ENSG00000065457.10|ENSG00000065457.10|0|4486	-0.263421	3.31417	3.14729	0.0771574	0.0991394
ENSG00000065485.19|mRNA|PDIA5|ENSG00000065485.19|ENSG00000065485.19|0|4030	0.867495	5.72615	34.3133	1.33405e-08	6.04123e-08
ENSG00000065491.8|mRNA|TBC1D22B|ENSG00000065491.8|ENSG00000065491.8|0|3462	-0.982418	3.43388	43.375	2.28114e-10	1.50206e-09
ENSG00000065518.7|mRNA|NDUFB4|ENSG00000065518.7|ENSG00000065518.7|0|1889	-0.135429	5.25672	1.58542	0.209047	0.246844
ENSG00000065526.10|mRNA|SPEN|ENSG00000065526.10|ENSG00000065526.10|0|13294	-0.00235911	5.45819	0.000630012	0.979993	0.983791
ENSG00000065534.18|mRNA|MYLK|ENSG00000065534.18|ENSG00000065534.18|0|22167	1.51688	9.56162	58.1227	3.99869e-13	5.60463e-12
ENSG00000065548.17|mRNA|ZC3H15|ENSG00000065548.17|ENSG00000065548.17|0|3125	-0.987146	6.65883	81.3084	3.35713e-17	1.44963e-15
ENSG00000065559.14|mRNA|MAP2K4|ENSG00000065559.14|ENSG00000065559.14|0|5714	0.561848	6.38976	25.9112	6.63004e-07	2.20872e-06
ENSG00000065600.12|mRNA|TMEM206|ENSG00000065600.12|ENSG00000065600.12|0|2914	0.654636	3.1779	13.9403	0.000229273	0.000479636
ENSG00000065613.13|mRNA|SLK|ENSG00000065613.13|ENSG00000065613.13|0|7974	-0.0863761	7.44814	1.30508	0.254279	0.294227
ENSG00000065615.13|mRNA|CYB5R4|ENSG00000065615.13|ENSG00000065615.13|0|9635	0.0118704	6.06579	0.0160023	0.899428	0.916991
ENSG00000065675.14|mRNA|PRKCQ|ENSG00000065675.14|ENSG00000065675.14|0|3295	0.908808	6.87587	47.0142	4.62294e-11	3.62297e-10
ENSG00000065717.14|mRNA|TLE2|ENSG00000065717.14|ENSG00000065717.14|0|4038	-1.45263	2.30369	45.9876	7.23741e-11	5.40435e-10
ENSG00000065802.11|mRNA|ASB1|ENSG00000065802.11|ENSG00000065802.11|0|7410	-1.10698	1.94062	25.8284	6.89518e-07	2.28799e-06
ENSG00000065809.13|mRNA|FAM107B|ENSG00000065809.13|ENSG00000065809.13|0|7019	-0.370283	7.0063	16.4699	6.44355e-05	0.000149334
ENSG00000065833.8|mRNA|ME1|ENSG00000065833.8|ENSG00000065833.8|0|3371	0.871383	4.72365	15.4418	0.000107652	0.000239634
ENSG00000065882.15|mRNA|TBC1D1|ENSG00000065882.15|ENSG00000065882.15|0|9032	0.0844451	7.64643	1.15917	0.282579	0.323874
ENSG00000065883.14|mRNA|CDK13|ENSG00000065883.14|ENSG00000065883.14|0|8921	-0.171675	5.36554	2.89912	0.0897559	0.113756
ENSG00000065911.11|mRNA|MTHFD2|ENSG00000065911.11|ENSG00000065911.11|0|4870	0.736637	6.7378	40.3264	8.82966e-10	5.0693e-09
ENSG00000065923.9|mRNA|SLC9A7|ENSG00000065923.9|ENSG00000065923.9|0|10033	0.89153	4.66096	31.311	5.30238e-08	2.14602e-07
ENSG00000065970.8|mRNA|FOXJ2|ENSG00000065970.8|ENSG00000065970.8|0|6296	0.00307394	4.63883	0.000582651	0.98076	0.984412
ENSG00000065978.18|mRNA|YBX1|ENSG00000065978.18|ENSG00000065978.18|0|1930	-0.824706	10.4391	89.8486	1.24394e-18	7.58725e-17
ENSG00000065989.15|mRNA|PDE4A|ENSG00000065989.15|ENSG00000065989.15|0|6646	-1.03676	2.7048	28.8257	1.68351e-07	6.21346e-07
ENSG00000066027.11|mRNA|PPP2R5A|ENSG00000066027.11|ENSG00000066027.11|0|3825	0.403255	6.91413	15.3682	0.000111698	0.000247837
ENSG00000066044.14|mRNA|ELAVL1|ENSG00000066044.14|ENSG00000066044.14|0|6956	0.330392	5.4432	10.8128	0.00113892	0.00208287
ENSG00000066084.12|mRNA|DIP2B|ENSG00000066084.12|ENSG00000066084.12|0|10361	-0.516475	4.9768	22.6066	3.20802e-06	9.40359e-06
ENSG00000066117.14|mRNA|SMARCD1|ENSG00000066117.14|ENSG00000066117.14|0|5136	-0.988022	4.32993	64.1812	3.22302e-14	6.23502e-13
ENSG00000066135.12|mRNA|KDM4A|ENSG00000066135.12|ENSG00000066135.12|0|5172	-0.734567	4.23559	23.9597	1.67713e-06	5.17247e-06
ENSG00000066136.20|mRNA|NFYC|ENSG00000066136.20|ENSG00000066136.20|0|5990	-0.117529	6.06109	2.08636	0.149756	0.181761
ENSG00000066185.12|mRNA|ZMYND12|ENSG00000066185.12|ENSG00000066185.12|0|2195	1.15263	4.2876	25.025	1.00948e-06	3.24759e-06
ENSG00000066279.17|mRNA|ASPM|ENSG00000066279.17|ENSG00000066279.17|0|10887	-0.028595	4.12682	0.0460501	0.830243	0.855154
ENSG00000066294.14|mRNA|CD84|ENSG00000066294.14|ENSG00000066294.14|0|9255	1.41208	6.3779	52.6652	4.03432e-12	4.2283e-11
ENSG00000066322.14|mRNA|ELOVL1|ENSG00000066322.14|ENSG00000066322.14|0|2507	-0.304996	3.1174	4.58579	0.0331152	0.0455946
ENSG00000066336.11|mRNA|SPI1|ENSG00000066336.11|ENSG00000066336.11|0|2069	-1.21721	6.85449	88.9719	1.73822e-18	1.01668e-16
ENSG00000066379.14|mRNA|ZNRD1|ENSG00000066379.14|ENSG00000066379.14|0|3672	-1.53186	3.27374	83.5662	1.3936e-17	6.5866e-16
ENSG00000066382.16|mRNA|MPPED2|ENSG00000066382.16|ENSG00000066382.16|0|8197	0.877338	2.21601	14.9589	0.000137168	0.000299716
ENSG00000066422.4|mRNA|ZBTB11|ENSG00000066422.4|ENSG00000066422.4|0|7416	0.0203143	5.49562	0.0473387	0.827922	0.853027
ENSG00000066427.21|mRNA|ATXN3|ENSG00000066427.21|ENSG00000066427.21|0|28202	-0.11966	5.86039	2.12683	0.145878	0.177444
ENSG00000066455.12|mRNA|GOLGA5|ENSG00000066455.12|ENSG00000066455.12|0|3295	-0.309881	5.54017	13.829	0.00024256	0.000505048
ENSG00000066557.5|mRNA|LRRC40|ENSG00000066557.5|ENSG00000066557.5|0|2884	-0.279318	3.82618	5.09081	0.0248368	0.0350011
ENSG00000066583.11|mRNA|ISOC1|ENSG00000066583.11|ENSG00000066583.11|0|1940	-0.130091	3.89949	1.19676	0.274925	0.31599
ENSG00000066629.16|mRNA|EML1|ENSG00000066629.16|ENSG00000066629.16|0|8899	-1.47814	2.33881	44.6884	1.27919e-10	8.96782e-10
ENSG00000066651.18|mRNA|TRMT11|ENSG00000066651.18|ENSG00000066651.18|0|2690	0.118999	3.29264	0.651674	0.420211	0.465049
ENSG00000066654.13|mRNA|THUMPD1|ENSG00000066654.13|ENSG00000066654.13|0|6501	0.137279	5.19216	1.30297	0.254662	0.294568
ENSG00000066697.14|mRNA|MSANTD3|ENSG00000066697.14|ENSG00000066697.14|0|3253	1.45842	7.33074	60.8974	1.25427e-13	2.08644e-12
ENSG00000066735.14|mRNA|KIF26A|ENSG00000066735.14|ENSG00000066735.14|0|6756	-0.81787	2.32802	12.0528	0.000600212	0.00115642
ENSG00000066739.11|mRNA|ATG2B|ENSG00000066739.11|ENSG00000066739.11|0|14778	0.107076	4.94934	0.856002	0.355669	0.399472
ENSG00000066777.8|mRNA|ARFGEF1|ENSG00000066777.8|ENSG00000066777.8|0|10964	0.484876	7.71954	23.9	1.72565e-06	5.30815e-06
ENSG00000066827.15|mRNA|ZFAT|ENSG00000066827.15|ENSG00000066827.15|0|8900	0.575634	4.82334	5.29095	0.0221839	0.0315883
ENSG00000066855.15|mRNA|MTFR1|ENSG00000066855.15|ENSG00000066855.15|0|4629	0.550561	3.84511	20.2026	1.02667e-05	2.75487e-05
ENSG00000066923.17|mRNA|STAG3|ENSG00000066923.17|ENSG00000066923.17|0|8583	-1.0347	3.10766	57.7883	4.60147e-13	6.32504e-12
ENSG00000066926.10|mRNA|FECH|ENSG00000066926.10|ENSG00000066926.10|0|4473	-0.34839	7.01754	4.98641	0.0263503	0.0369227
ENSG00000066933.15|mRNA|MYO9A|ENSG00000066933.15|ENSG00000066933.15|0|20253	0.17662	5.85238	3.45435	0.0641519	0.0836992
ENSG00000067048.16|mRNA|DDX3Y|ENSG00000067048.16|ENSG00000067048.16|0|5738	0.597272	6.23288	3.8705	0.0501448	0.0668319
ENSG00000067057.16|mRNA|PFKP|ENSG00000067057.16|ENSG00000067057.16|0|4836	0.674328	5.76312	27.0323	3.90493e-07	1.3538e-06
ENSG00000067064.10|mRNA|IDI1|ENSG00000067064.10|ENSG00000067064.10|0|3589	-0.757117	4.16967	40.6796	7.54231e-10	4.41536e-09
ENSG00000067066.16|mRNA|SP100|ENSG00000067066.16|ENSG00000067066.16|0|12618	-0.815106	7.27051	79.5163	6.77375e-17	2.70746e-15
ENSG00000067082.14|mRNA|KLF6|ENSG00000067082.14|ENSG00000067082.14|0|6139	-0.679031	5.19902	30.3735	8.18683e-08	3.20924e-07
ENSG00000067113.16|mRNA|PLPP1|ENSG00000067113.16|ENSG00000067113.16|0|2016	-1.14142	2.46787	36.2764	5.45996e-09	2.67894e-08
ENSG00000067167.7|mRNA|TRAM1|ENSG00000067167.7|ENSG00000067167.7|0|3878	1.36897	9.34465	68.8759	4.73315e-15	1.16547e-13
ENSG00000067182.7|mRNA|TNFRSF1A|ENSG00000067182.7|ENSG00000067182.7|0|4005	-0.767183	3.62613	16.5014	6.34351e-05	0.00014722
ENSG00000067191.15|mRNA|CACNB1|ENSG00000067191.15|ENSG00000067191.15|0|7094	0.903203	3.44672	27.0774	3.82295e-07	1.32745e-06
ENSG00000067208.14|mRNA|EVI5|ENSG00000067208.14|ENSG00000067208.14|0|8276	0.547209	6.85544	27.0842	3.8107e-07	1.32366e-06
ENSG00000067225.17|mRNA|PKM|ENSG00000067225.17|ENSG00000067225.17|0|8571	1.17062	10.9573	55.2141	1.36354e-12	1.64325e-11
ENSG00000067248.9|mRNA|DHX29|ENSG00000067248.9|ENSG00000067248.9|0|4734	0.667598	6.69556	38.1643	2.32724e-09	1.22893e-08
ENSG00000067334.13|mRNA|DNTTIP2|ENSG00000067334.13|ENSG00000067334.13|0|7519	-1.09162	5.19785	68.6172	5.25696e-15	1.2771e-13
ENSG00000067365.14|mRNA|METTL22|ENSG00000067365.14|ENSG00000067365.14|0|8254	1.33765	5.67335	53.5107	2.81228e-12	3.05672e-11
ENSG00000067369.13|mRNA|TP53BP1|ENSG00000067369.13|ENSG00000067369.13|0|12991	-0.315057	4.30535	5.66735	0.0179635	0.026036
ENSG00000067533.5|mRNA|RRP15|ENSG00000067533.5|ENSG00000067533.5|0|7883	-1.07593	3.349	50.6118	9.73331e-12	9.16124e-11
ENSG00000067560.10|mRNA|RHOA|ENSG00000067560.10|ENSG00000067560.10|0|2582	0.458934	9.69776	24.5596	1.25977e-06	3.97754e-06
ENSG00000067596.10|mRNA|DHX8|ENSG00000067596.10|ENSG00000067596.10|0|9302	-0.718044	5.26528	37.8017	2.74008e-09	1.42766e-08
ENSG00000067601.7|pseudogene|PMS2P4|ENSG00000067601.7|ENSG00000067601.7|0|1060	0.787618	3.15687	25.6018	7.67703e-07	2.52754e-06
ENSG00000067606.16|mRNA|PRKCZ|ENSG00000067606.16|ENSG00000067606.16|0|7636	-1.26341	2.5778	39.1566	1.49015e-09	8.17859e-09
ENSG00000067646.11|mRNA|ZFY|ENSG00000067646.11|ENSG00000067646.11|0|5527	-0.259767	3.57983	1.01319	0.315024	0.357851
ENSG00000067704.9|mRNA|IARS2|ENSG00000067704.9|ENSG00000067704.9|0|4165	-0.315098	4.04018	5.92181	0.0155906	0.0228542
ENSG00000067829.18|mRNA|IDH3G|ENSG00000067829.18|ENSG00000067829.18|0|2717	-0.610801	5.25074	38.4662	2.03172e-09	1.08364e-08
ENSG00000067836.12|mRNA|ROGDI|ENSG00000067836.12|ENSG00000067836.12|0|3683	-0.331627	4.66282	7.53177	0.00646023	0.0101759
ENSG00000067840.12|mRNA|PDZD4|ENSG00000067840.12|ENSG00000067840.12|0|4341	-0.734894	2.04185	12.6832	0.000434516	0.000862074
ENSG00000067900.7|mRNA|ROCK1|ENSG00000067900.7|ENSG00000067900.7|0|11113	0.359175	9.13177	14.4651	0.000175875	0.000376216
ENSG00000067955.13|mRNA|CBFB|ENSG00000067955.13|ENSG00000067955.13|0|4129	-0.560974	4.92033	29.6111	1.167e-07	4.44621e-07
ENSG00000067992.12|mRNA|PDK3|ENSG00000067992.12|ENSG00000067992.12|0|2695	1.03092	5.91352	51.9682	5.43635e-12	5.50956e-11
ENSG00000068024.16|mRNA|HDAC4|ENSG00000068024.16|ENSG00000068024.16|0|13368	-0.703557	4.18682	20.9895	7.00429e-06	1.93679e-05
ENSG00000068028.17|mRNA|RASSF1|ENSG00000068028.17|ENSG00000068028.17|0|3683	-0.936342	3.93736	45.1901	1.02631e-10	7.3553e-10
ENSG00000068079.7|mRNA|IFI35|ENSG00000068079.7|ENSG00000068079.7|0|1973	-1.2396	4.16496	59.8823	1.91461e-13	2.9974e-12
ENSG00000068097.14|mRNA|HEATR6|ENSG00000068097.14|ENSG00000068097.14|0|4868	-0.765832	2.65411	15.9091	8.52154e-05	0.000192963
ENSG00000068120.14|mRNA|COASY|ENSG00000068120.14|ENSG00000068120.14|0|4032	-0.147797	3.15648	0.931958	0.335201	0.378528
ENSG00000068305.17|mRNA|MEF2A|ENSG00000068305.17|ENSG00000068305.17|0|6925	0.617182	7.09972	36.1494	5.78355e-09	2.82313e-08
ENSG00000068308.13|mRNA|OTUD5|ENSG00000068308.13|ENSG00000068308.13|0|3592	0.519877	6.48147	22.3602	3.61196e-06	1.05046e-05
ENSG00000068323.16|mRNA|TFE3|ENSG00000068323.16|ENSG00000068323.16|0|4283	-0.217068	4.69623	4.31721	0.0386546	0.0525682
ENSG00000068354.15|mRNA|TBC1D25|ENSG00000068354.15|ENSG00000068354.15|0|4223	0.755976	3.87703	29.4637	1.25e-07	4.73799e-07
ENSG00000068366.19|mRNA|ACSL4|ENSG00000068366.19|ENSG00000068366.19|0|6415	0.837834	7.21225	41.8863	4.40928e-10	2.72354e-09
ENSG00000068383.18|mRNA|INPP5A|ENSG00000068383.18|ENSG00000068383.18|0|3706	0.898579	5.84935	37.393	3.29468e-09	1.691e-08
ENSG00000068394.10|mRNA|GPKOW|ENSG00000068394.10|ENSG00000068394.10|0|1742	-1.18133	4.21186	61.4756	9.86345e-14	1.67999e-12
ENSG00000068400.13|mRNA|GRIPAP1|ENSG00000068400.13|ENSG00000068400.13|0|6841	-0.00545527	6.55509	0.00365611	0.951829	0.96147
ENSG00000068438.14|mRNA|FTSJ1|ENSG00000068438.14|ENSG00000068438.14|0|2872	-1.1531	3.55665	45.6925	8.2349e-11	6.07416e-10
ENSG00000068489.12|mRNA|PRR11|ENSG00000068489.12|ENSG00000068489.12|0|4080	0.355766	4.84855	9.3061	0.00250647	0.00428708
ENSG00000068650.18|mRNA|ATP11A|ENSG00000068650.18|ENSG00000068650.18|0|13733	1.09774	5.61728	52.3029	4.71056e-12	4.86546e-11
ENSG00000068654.15|mRNA|POLR1A|ENSG00000068654.15|ENSG00000068654.15|0|13519	-0.345545	3.98244	5.20124	0.0233344	0.0330825
ENSG00000068697.6|mRNA|LAPTM4A|ENSG00000068697.6|ENSG00000068697.6|0|1946	-0.0241007	3.72141	0.026282	0.871332	0.891915
ENSG00000068724.15|mRNA|TTC7A|ENSG00000068724.15|ENSG00000068724.15|0|6949	-0.188641	5.01131	0.853815	0.356284	0.40014
ENSG00000068745.14|mRNA|IP6K2|ENSG00000068745.14|ENSG00000068745.14|0|5624	-0.221352	4.34181	3.7301	0.0544658	0.0720419
ENSG00000068781.21|mRNA|STON1-GTF2A1L|ENSG00000068781.21|ENSG00000068781.21|0|4294	1.21358	5.40326	38.4642	2.03349e-09	1.08415e-08
ENSG00000068784.12|mRNA|SRBD1|ENSG00000068784.12|ENSG00000068784.12|0|5045	0.140543	5.73949	2.80566	0.0950666	0.119931
ENSG00000068796.16|mRNA|KIF2A|ENSG00000068796.16|ENSG00000068796.16|0|4774	1.4791	12.0578	52.7473	3.89527e-12	4.10412e-11
ENSG00000068831.18|mRNA|RASGRP2|ENSG00000068831.18|ENSG00000068831.18|0|6084	0.703798	7.63245	36.4455	5.05709e-09	2.49724e-08
ENSG00000068878.14|mRNA|PSME4|ENSG00000068878.14|ENSG00000068878.14|0|10241	0.0316082	6.79044	0.107141	0.743671	0.776288
ENSG00000068885.14|mRNA|IFT80|ENSG00000068885.14|ENSG00000068885.14|0|7175	0.818522	5.45103	35.6184	7.36023e-09	3.51028e-08
ENSG00000068903.19|mRNA|SIRT2|ENSG00000068903.19|ENSG00000068903.19|0|6224	0.170978	5.19038	2.7259	0.0998716	0.125405
ENSG00000068912.13|mRNA|ERLEC1|ENSG00000068912.13|ENSG00000068912.13|0|2592	0.454143	4.98428	17.8343	3.27736e-05	8.02343e-05
ENSG00000068971.13|mRNA|PPP2R5B|ENSG00000068971.13|ENSG00000068971.13|0|3376	-0.727208	2.60052	18.4231	2.45225e-05	6.14216e-05
ENSG00000069020.18|mRNA|MAST4|ENSG00000069020.18|ENSG00000069020.18|0|14675	1.16744	7.22407	42.621	3.18366e-10	2.0261e-09
ENSG00000069122.18|mRNA|ADGRF5|ENSG00000069122.18|ENSG00000069122.18|0|6650	-0.995925	3.12261	25.6685	7.43786e-07	2.45244e-06
ENSG00000069188.16|mRNA|SDK2|ENSG00000069188.16|ENSG00000069188.16|0|11607	0.219343	2.27509	0.361416	0.548215	0.591355
ENSG00000069248.11|mRNA|NUP133|ENSG00000069248.11|ENSG00000069248.11|0|6080	-0.29741	4.87467	9.39048	0.00239736	0.00411033
ENSG00000069275.12|mRNA|NUCKS1|ENSG00000069275.12|ENSG00000069275.12|0|6546	0.161645	8.32862	4.46631	0.0354685	0.0485966
ENSG00000069329.16|mRNA|VPS35|ENSG00000069329.16|ENSG00000069329.16|0|9733	-0.63168	6.4692	51.796	5.85281e-12	5.86836e-11
ENSG00000069345.11|mRNA|DNAJA2|ENSG00000069345.11|ENSG00000069345.11|0|5065	-0.01855	7.00812	0.058687	0.808764	0.835489
ENSG00000069399.14|mRNA|BCL3|ENSG00000069399.14|ENSG00000069399.14|0|3242	-1.47785	4.31448	66.4439	1.27405e-14	2.74417e-13
ENSG00000069424.14|mRNA|KCNAB2|ENSG00000069424.14|ENSG00000069424.14|0|9534	-0.644225	5.2705	21.8735	4.56706e-06	1.30576e-05
ENSG00000069493.14|mRNA|CLEC2D|ENSG00000069493.14|ENSG00000069493.14|0|6957	-0.969303	4.258	58.1456	3.96039e-13	5.5666e-12
ENSG00000069509.5|mRNA|FUNDC1|ENSG00000069509.5|ENSG00000069509.5|0|1399	0.602831	5.61412	17.3785	4.10528e-05	9.8841e-05
ENSG00000069535.13|mRNA|MAOB|ENSG00000069535.13|ENSG00000069535.13|0|2891	1.32052	4.73052	39.9951	1.02379e-09	5.79439e-09
ENSG00000069667.15|mRNA|RORA|ENSG00000069667.15|ENSG00000069667.15|0|17040	-0.929679	3.95801	36.3823	5.20397e-09	2.56457e-08
ENSG00000069702.10|mRNA|TGFBR3|ENSG00000069702.10|ENSG00000069702.10|0|8705	-1.41333	2.8123	53.8665	2.41674e-12	2.68684e-11
ENSG00000069849.10|mRNA|ATP1B3|ENSG00000069849.10|ENSG00000069849.10|0|2584	-0.110522	3.4634	0.605594	0.917173	0.932081
ENSG00000069869.15|mRNA|NEDD4|ENSG00000069869.15|ENSG00000069869.15|0|9097	0.36881	5.60132	11.7228	0.000711271	0.00134966
ENSG00000069943.9|mRNA|PIGB|ENSG00000069943.9|ENSG00000069943.9|0|4542	0.770046	4.03086	24.5108	1.28939e-06	4.06521e-06
ENSG00000069956.11|mRNA|MAPK6|ENSG00000069956.11|ENSG00000069956.11|0|6388	0.706047	4.9097	24.4719	1.31352e-06	4.13417e-06
ENSG00000069966.18|mRNA|GNB5|ENSG00000069966.18|ENSG00000069966.18|0|13302	1.45261	7.761	75.6571	3.11101e-16	1.0172e-14
ENSG00000069974.15|mRNA|RAB27A|ENSG00000069974.15|ENSG00000069974.15|0|5605	-0.992865	4.41025	58.6639	3.18671e-13	4.62247e-12
ENSG00000069998.12|mRNA|HDHD5|ENSG00000069998.12|ENSG00000069998.12|0|4936	-1.20639	2.09873	31.7658	4.29743e-08	1.76799e-07
ENSG00000070010.18|mRNA|UFD1|ENSG00000070010.18|ENSG00000070010.18|0|8736	0.35964	6.70257	16.146	7.57151e-05	0.000173181
ENSG00000070018.8|mRNA|LRP6|ENSG00000070018.8|ENSG00000070018.8|0|10337	-0.425551	2.90541	5.11356	0.0245193	0.0345927
ENSG00000070047.11|mRNA|PHRF1|ENSG00000070047.11|ENSG00000070047.11|0|5769	-0.52852	5.26588	13.4626	0.000292113	0.000598296
ENSG00000070061.14|mRNA|ELP1|ENSG00000070061.14|ENSG00000070061.14|0|6048	-0.715946	4.28702	24.4966	1.2981e-06	4.0895e-06
ENSG00000070081.15|mRNA|NUCB2|ENSG00000070081.15|ENSG00000070081.15|0|8995	0.716334	7.60912	47.9399	3.0903e-11	2.5209e-10
ENSG00000070182.19|mRNA|SPTB|ENSG00000070182.19|ENSG00000070182.19|0|14772	0.627995	7.84428	16.8772	5.26294e-05	0.00012418
ENSG00000070190.12|mRNA|DAPP1|ENSG00000070190.12|ENSG00000070190.12|0|4548	1.36276	9.91836	58.4733	3.45181e-13	4.97444e-12
ENSG00000070214.15|mRNA|SLC44A1|ENSG00000070214.15|ENSG00000070214.15|0|12172	1.4271	6.68242	62.0976	7.62054e-14	1.33092e-12
ENSG00000070269.13|mRNA|TMEM260|ENSG00000070269.13|ENSG00000070269.13|0|8077	0.923695	3.38909	28.8032	1.70128e-07	6.27674e-07
ENSG00000070366.13|mRNA|SMG6|ENSG00000070366.13|ENSG00000070366.13|0|10554	-0.274023	3.71492	3.76799	0.053262	0.0706041
ENSG00000070367.15|mRNA|EXOC5|ENSG00000070367.15|ENSG00000070367.15|0|12575	0.211766	6.71568	5.22685	0.0229997	0.0326521
ENSG00000070413.19|mRNA|DGCR2|ENSG00000070413.19|ENSG00000070413.19|0|5605	1.1341	4.03854	39.2154	1.45144e-09	7.98369e-09
ENSG00000070423.17|mRNA|RNF126|ENSG00000070423.17|ENSG00000070423.17|0|3496	-1.46651	3.87126	91.7684	5.99659e-19	3.85813e-17
ENSG00000070444.14|mRNA|MNT|ENSG00000070444.14|ENSG00000070444.14|0|8728	-0.123529	3.97072	0.991296	0.320299	0.363037
ENSG00000070476.14|mRNA|ZXDC|ENSG00000070476.14|ENSG00000070476.14|0|7357	-0.341061	2.72884	2.59354	0.108445	0.135395
ENSG00000070495.14|mRNA|JMJD6|ENSG00000070495.14|ENSG00000070495.14|0|5969	-1.23974	3.21778	46.4454	5.92496e-11	4.53119e-10
ENSG00000070501.11|mRNA|POLB|ENSG00000070501.11|ENSG00000070501.11|0|4106	-0.641808	4.84141	32.3745	3.24601e-08	1.36615e-07
ENSG00000070540.12|mRNA|WIPI1|ENSG00000070540.12|ENSG00000070540.12|0|3402	0.995836	6.88974	49.5046	1.569e-11	1.38406e-10
ENSG00000070610.14|mRNA|GBA2|ENSG00000070610.14|ENSG00000070610.14|0|4803	-0.492901	3.32001	9.78955	0.00194337	0.00339023
ENSG00000070614.14|mRNA|NDST1|ENSG00000070614.14|ENSG00000070614.14|0|9529	1.19727	6.43261	43.4125	2.24377e-10	1.4799e-09
ENSG00000070669.16|mRNA|ASNS|ENSG00000070669.16|ENSG00000070669.16|0|4455	-0.534744	2.25099	6.53182	0.0111332	0.0167942
ENSG00000070718.11|mRNA|AP3M2|ENSG00000070718.11|ENSG00000070718.11|0|6276	0.215378	3.35196	2.36303	0.125388	0.154489
ENSG00000070756.15|mRNA|PABPC1|ENSG00000070756.15|ENSG00000070756.15|0|4752	-0.436563	10.8774	25.8741	6.7476e-07	2.24414e-06
ENSG00000070759.16|mRNA|TESK2|ENSG00000070759.16|ENSG00000070759.16|0|3322	0.330962	3.76367	7.19031	0.00777207	0.0120671
ENSG00000070761.7|mRNA|CFAP20|ENSG00000070761.7|ENSG00000070761.7|0|2375	-1.30145	3.29669	59.763	2.01231e-13	3.12826e-12
ENSG00000070770.8|mRNA|CSNK2A2|ENSG00000070770.8|ENSG00000070770.8|0|6905	-0.46454	4.83929	19.3102	1.58709e-05	4.12329e-05
ENSG00000070778.12|mRNA|PTPN21|ENSG00000070778.12|ENSG00000070778.12|0|7396	-1.30351	2.26344	26.9678	4.02538e-07	1.39265e-06
ENSG00000070785.16|mRNA|EIF2B3|ENSG00000070785.16|ENSG00000070785.16|0|3411	-0.965916	3.19963	40.3373	8.78663e-10	5.05041e-09
ENSG00000070814.17|mRNA|TCOF1|ENSG00000070814.17|ENSG00000070814.17|0|11278	-0.695129	5.27274	25.5364	7.9188e-07	2.6007e-06
ENSG00000070831.15|mRNA|CDC42|ENSG00000070831.15|ENSG00000070831.15|0|3598	0.675645	9.22921	36.9524	4.02045e-09	2.0229e-08
ENSG00000070882.12|mRNA|OSBPL3|ENSG00000070882.12|ENSG00000070882.12|0|8100	-0.395986	3.94693	8.12341	0.00469978	0.00759805
ENSG00000070915.9|mRNA|SLC12A3|ENSG00000070915.9|ENSG00000070915.9|0|6180	1.2254	2.56044	6.67492	0.0102933	0.0156383
ENSG00000070950.9|mRNA|RAD18|ENSG00000070950.9|ENSG00000070950.9|0|6983	0.310045	4.60108	7.23298	0.00759417	0.0118102
ENSG00000070961.15|mRNA|ATP2B1|ENSG00000070961.15|ENSG00000070961.15|0|9493	-0.102538	4.88844	0.443284	0.506099	0.549999
ENSG00000071051.13|mRNA|NCK2|ENSG00000071051.13|ENSG00000071051.13|0|2990	1.36252	7.91185	64.2847	3.08854e-14	6.02749e-13
ENSG00000071054.16|mRNA|MAP4K4|ENSG00000071054.16|ENSG00000071054.16|0|11961	-0.452431	8.3604	26.5854	4.82077e-07	1.64528e-06
ENSG00000071073.12|mRNA|MGAT4A|ENSG00000071073.12|ENSG00000071073.12|0|9630	-0.740654	3.82915	18.0486	2.94868e-05	7.28225e-05
ENSG00000071082.10|mRNA|RPL31|ENSG00000071082.10|ENSG00000071082.10|0|5791	-1.64717	8.87497	187.886	5.85001e-33	6.86344e-30
ENSG00000071127.16|mRNA|WDR1|ENSG00000071127.16|ENSG00000071127.16|0|7827	0.944856	10.2676	43.3225	2.33467e-10	1.53427e-09
ENSG00000071189.21|mRNA|SNX13|ENSG00000071189.21|ENSG00000071189.21|0|16418	0.403514	6.17112	13.4118	0.000299752	0.000612616
ENSG00000071205.11|mRNA|ARHGAP10|ENSG00000071205.11|ENSG00000071205.11|0|10759	1.29452	9.30496	49.7505	1.41092e-11	1.26419e-10
ENSG00000071242.11|mRNA|RPS6KA2|ENSG00000071242.11|ENSG00000071242.11|0|8243	-0.916776	4.60866	31.2521	5.44868e-08	2.19988e-07
ENSG00000071243.15|mRNA|ING3|ENSG00000071243.15|ENSG00000071243.15|0|5214	0.206252	5.48548	4.19252	0.0415507	0.0562079
ENSG00000071246.10|mRNA|VASH1|ENSG00000071246.10|ENSG00000071246.10|0|6502	-0.301405	4.49426	5.79432	0.0167359	0.0244058
ENSG00000071282.11|mRNA|LMCD1|ENSG00000071282.11|ENSG00000071282.11|0|9130	-1.4249	2.70737	46.3257	6.243e-11	4.74529e-10
ENSG00000071462.11|mRNA|BUD23|ENSG00000071462.11|ENSG00000071462.11|0|7944	-0.604531	4.03897	22.6432	3.15211e-06	9.25359e-06
ENSG00000071537.13|mRNA|SEL1L|ENSG00000071537.13|ENSG00000071537.13|0|9559	1.23427	5.98864	80.7988	4.09718e-17	1.71677e-15
ENSG00000071539.13|mRNA|TRIP13|ENSG00000071539.13|ENSG00000071539.13|0|3560	0.153325	2.35107	0.759648	0.384197	0.428508
ENSG00000071553.16|mRNA|ATP6AP1|ENSG00000071553.16|ENSG00000071553.16|0|4884	1.21903	4.83583	50.1843	1.17014e-11	1.07254e-10
ENSG00000071564.14|mRNA|TCF3|ENSG00000071564.14|ENSG00000071564.14|0|6080	-0.842188	5.38605	30.0696	9.42792e-08	3.65552e-07
ENSG00000071575.11|mRNA|TRIB2|ENSG00000071575.11|ENSG00000071575.11|0|4588	-0.848008	2.51239	20.9931	6.99202e-06	1.93481e-05
ENSG00000071626.16|mRNA|DAZAP1|ENSG00000071626.16|ENSG00000071626.16|0|9201	-0.790186	5.73819	60.106	1.74395e-13	2.76495e-12
ENSG00000071655.17|mRNA|MBD3|ENSG00000071655.17|ENSG00000071655.17|0|7845	-0.295367	4.24699	4.35504	0.0378186	0.0515304
ENSG00000071794.15|mRNA|HLTF|ENSG00000071794.15|ENSG00000071794.15|0|6024	0.679967	5.19338	29.2257	1.39668e-07	5.23428e-07
ENSG00000071859.14|mRNA|FAM50A|ENSG00000071859.14|ENSG00000071859.14|0|2567	0.185238	7.13077	3.71485	0.0549584	0.0726502
ENSG00000071889.16|mRNA|FAM3A|ENSG00000071889.16|ENSG00000071889.16|0|5098	0.0842424	3.37732	0.287112	0.592509	0.633512
ENSG00000071894.16|mRNA|CPSF1|ENSG00000071894.16|ENSG00000071894.16|0|6072	-0.563673	4.63008	11.0633	0.00100012	0.00184853
ENSG00000071909.18|mRNA|MYO3B|ENSG00000071909.18|ENSG00000071909.18|0|8236	1.60063	3.82863	25.9283	6.57659e-07	2.19238e-06
ENSG00000071967.11|mRNA|CYBRD1|ENSG00000071967.11|ENSG00000071967.11|0|5176	-0.744199	2.47342	15.4536	0.000107019	0.00023833
ENSG00000071994.10|mRNA|PDCD2|ENSG00000071994.10|ENSG00000071994.10|0|6476	-1.3292	4.74034	87.5334	3.01508e-18	1.67509e-16
ENSG00000072042.12|mRNA|RDH11|ENSG00000072042.12|ENSG00000072042.12|0|5518	1.32822	7.64978	41.3742	5.53573e-10	3.34475e-09
ENSG00000072062.13|mRNA|PRKACA|ENSG00000072062.13|ENSG00000072062.13|0|6144	-0.465018	6.5544	28.4222	2.03315e-07	7.40931e-07
ENSG00000072110.13|mRNA|ACTN1|ENSG00000072110.13|ENSG00000072110.13|0|10626	1.40643	10.7223	54.4824	1.85994e-12	2.14803e-11
ENSG00000072121.15|mRNA|ZFYVE26|ENSG00000072121.15|ENSG00000072121.15|0|15706	0.0710369	4.54111	0.106906	0.743943	0.776531
ENSG00000072134.15|mRNA|EPN2|ENSG00000072134.15|ENSG00000072134.15|0|8517	-0.910675	2.02107	17.7656	3.39048e-05	8.27902e-05
ENSG00000072135.12|mRNA|PTPN18|ENSG00000072135.12|ENSG00000072135.12|0|5774	0.74719	7.30177	36.2623	5.4949e-09	2.69343e-08
ENSG00000072163.19|mRNA|LIMS2|ENSG00000072163.19|ENSG00000072163.19|0|8487	-1.29007	2.86327	41.3393	5.62239e-10	3.39094e-09
ENSG00000072201.13|mRNA|LNX1|ENSG00000072201.13|ENSG00000072201.13|0|5725	-0.313097	2.55348	2.71249	0.100705	0.126333
ENSG00000072210.18|mRNA|ALDH3A2|ENSG00000072210.18|ENSG00000072210.18|0|6457	-1.12465	3.27868	49.4127	1.63253e-11	1.43566e-10
ENSG00000072274.12|mRNA|TFRC|ENSG00000072274.12|ENSG00000072274.12|0|7887	-1.04083	5.57243	41.2873	5.75397e-10	3.4588e-09
ENSG00000072310.16|mRNA|SREBF1|ENSG00000072310.16|ENSG00000072310.16|0|8030	-0.177697	2.11051	0.427766	0.513632	0.557488
ENSG00000072364.12|mRNA|AFF4|ENSG00000072364.12|ENSG00000072364.12|0|11297	-0.0658436	5.93936	0.674922	0.412051	0.45688
ENSG00000072401.14|mRNA|UBE2D1|ENSG00000072401.14|ENSG00000072401.14|0|3486	-1.13361	5.16674	67.4729	8.37214e-15	1.92155e-13
ENSG00000072415.8|mRNA|MPP5|ENSG00000072415.8|ENSG00000072415.8|0|8743	0.813102	5.67686	41.5293	5.167e-10	3.14578e-09
ENSG00000072422.16|mRNA|RHOBTB1|ENSG00000072422.16|ENSG00000072422.16|0|4841	1.57477	7.20044	65.1666	2.14969e-14	4.33525e-13
ENSG00000072501.17|mRNA|SMC1A|ENSG00000072501.17|ENSG00000072501.17|0|10484	-0.0720688	7.77286	0.932073	0.335171	0.378517
ENSG00000072506.12|mRNA|HSD17B10|ENSG00000072506.12|ENSG00000072506.12|0|1115	-1.42741	3.65876	81.3078	3.35788e-17	1.44963e-15
ENSG00000072518.20|mRNA|MARK2|ENSG00000072518.20|ENSG00000072518.20|0|6154	-0.839429	5.35361	52.2394	4.84032e-12	4.98144e-11
ENSG00000072571.19|mRNA|HMMR|ENSG00000072571.19|ENSG00000072571.19|0|3936	0.115544	4.34521	0.717225	0.397791	0.44252
ENSG00000072609.17|mRNA|CHFR|ENSG00000072609.17|ENSG00000072609.17|0|17127	-0.3903	5.15283	11.8104	0.000679884	0.00129565
ENSG00000072657.8|mRNA|TRHDE|ENSG00000072657.8|ENSG00000072657.8|0|11950	1.55244	4.47945	44.0743	1.6759e-10	1.14042e-09
ENSG00000072694.20|mRNA|FCGR2B|ENSG00000072694.20|ENSG00000072694.20|0|6651	-0.75656	1.8149	8.66155	0.0035266	0.00585418
ENSG00000072736.18|mRNA|NFATC3|ENSG00000072736.18|ENSG00000072736.18|0|8806	-0.313952	5.71611	14.9241	0.000139583	0.00030456
ENSG00000072756.16|mRNA|TRNT1|ENSG00000072756.16|ENSG00000072756.16|0|5518	0.564798	6.08361	24.1673	1.51884e-06	4.72742e-06
ENSG00000072778.19|mRNA|ACADVL|ENSG00000072778.19|ENSG00000072778.19|0|4865	0.206748	5.8253	2.98426	0.085198	0.108517
ENSG00000072786.12|mRNA|STK10|ENSG00000072786.12|ENSG00000072786.12|0|9083	-0.783818	7.80392	41.8125	4.55611e-10	2.80381e-09
ENSG00000072803.17|mRNA|FBXW11|ENSG00000072803.17|ENSG00000072803.17|0|5577	0.573978	6.34952	40.1482	9.56102e-10	5.44997e-09
ENSG00000072818.11|mRNA|ACAP1|ENSG00000072818.11|ENSG00000072818.11|0|7421	-0.790477	5.08588	24.8054	1.12062e-06	3.57154e-06
ENSG00000072849.10|mRNA|DERL2|ENSG00000072849.10|ENSG00000072849.10|0|6386	0.565276	4.29593	19.1576	1.71018e-05	4.41838e-05
ENSG00000072858.10|mRNA|SIDT1|ENSG00000072858.10|ENSG00000072858.10|0|8060	1.00588	4.20782	31.3835	5.12754e-08	2.0799e-07
ENSG00000072864.14|mRNA|NDE1|ENSG00000072864.14|ENSG00000072864.14|0|5512	-0.0951211	5.48926	1.3614	0.244304	0.283871
ENSG00000072952.18|mRNA|MRVI1|ENSG00000072952.18|ENSG00000072952.18|0|7700	0.858767	4.99143	29.4822	1.23927e-07	4.69909e-07
ENSG00000072958.8|mRNA|AP1M1|ENSG00000072958.8|ENSG00000072958.8|0|14371	-0.536332	5.89308	33.6183	1.8334e-08	8.07399e-08
ENSG00000073050.11|mRNA|XRCC1|ENSG00000073050.11|ENSG00000073050.11|0|3459	-0.429688	5.2121	18.9178	1.92342e-05	4.9208e-05
ENSG00000073060.15|mRNA|SCARB1|ENSG00000073060.15|ENSG00000073060.15|0|7741	0.293671	3.12099	0.724479	0.395418	0.440101
ENSG00000073111.13|mRNA|MCM2|ENSG00000073111.13|ENSG00000073111.13|0|4902	-0.842292	3.88161	37.2221	3.55899e-09	1.81221e-08
ENSG00000073169.13|mRNA|SELENOO|ENSG00000073169.13|ENSG00000073169.13|0|2363	-0.458943	2.13121	3.06588	0.0810646	0.103623
ENSG00000073331.17|mRNA|ALPK1|ENSG00000073331.17|ENSG00000073331.17|0|12325	-0.846316	2.91073	26.9452	4.06845e-07	1.40633e-06
ENSG00000073350.13|mRNA|LLGL2|ENSG00000073350.13|ENSG00000073350.13|0|7909	-0.765769	3.2029	13.6543	0.000265019	0.000546959
ENSG00000073417.14|mRNA|PDE8A|ENSG00000073417.14|ENSG00000073417.14|0|7886	-0.694264	4.39546	49.2307	1.7662e-11	1.5394e-10
ENSG00000073464.11|mRNA|CLCN4|ENSG00000073464.11|ENSG00000073464.11|0|6789	1.48602	4.2515	48.3701	2.56397e-11	2.14327e-10
ENSG00000073578.16|mRNA|SDHA|ENSG00000073578.16|ENSG00000073578.16|0|8383	0.661344	7.36459	46.0654	6.99534e-11	5.25507e-10
ENSG00000073584.18|mRNA|SMARCE1|ENSG00000073584.18|ENSG00000073584.18|0|11022	-0.278087	7.51011	12.9344	0.000382226	0.000765873
ENSG00000073605.18|mRNA|GSDMB|ENSG00000073605.18|ENSG00000073605.18|0|5905	0.512625	1.91172	5.8004	0.0166793	0.0243321
ENSG00000073614.12|mRNA|KDM5A|ENSG00000073614.12|ENSG00000073614.12|0|12091	-0.307011	6.46596	9.26951	0.00255536	0.00436135
ENSG00000073712.14|mRNA|FERMT2|ENSG00000073712.14|ENSG00000073712.14|0|8510	-0.329597	4.16287	4.94199	0.0270233	0.0377965
ENSG00000073754.5|mRNA|CD5L|ENSG00000073754.5|ENSG00000073754.5|0|2456	-1.53521	1.91707	34.0048	1.53613e-08	6.87724e-08
ENSG00000073756.11|mRNA|PTGS2|ENSG00000073756.11|ENSG00000073756.11|0|5269	-1.88392	2.34256	78.0586	1.20234e-16	4.50763e-15
ENSG00000073792.15|mRNA|IGF2BP2|ENSG00000073792.15|ENSG00000073792.15|0|4735	1.14387	7.84659	56.1191	9.29723e-13	1.16259e-11
ENSG00000073803.13|mRNA|MAP3K13|ENSG00000073803.13|ENSG00000073803.13|0|12623	-0.471607	2.78812	6.12654	0.0139184	0.020586
ENSG00000073849.14|mRNA|ST6GAL1|ENSG00000073849.14|ENSG00000073849.14|0|9151	0.981007	6.23623	54.5015	1.84491e-12	2.13315e-11
ENSG00000073861.2|mRNA|TBX21|ENSG00000073861.2|ENSG00000073861.2|0|2614	-1.60765	3.99036	76.8149	1.96556e-16	6.95089e-15
ENSG00000073910.20|mRNA|FRY|ENSG00000073910.20|ENSG00000073910.20|0|13810	0.142579	5.15127	2.03114	0.155237	0.187911
ENSG00000073921.17|mRNA|PICALM|ENSG00000073921.17|ENSG00000073921.17|0|5833	0.290338	8.86729	8.38531	0.00408572	0.00668825
ENSG00000073969.18|mRNA|NSF|ENSG00000073969.18|ENSG00000073969.18|0|5005	-0.43169	5.58318	16.4356	6.55446e-05	0.000151693
ENSG00000074054.17|mRNA|CLASP1|ENSG00000074054.17|ENSG00000074054.17|0|11052	0.312923	6.09777	11.6972	0.000720735	0.00136515
ENSG00000074071.14|mRNA|MRPS34|ENSG00000074071.14|ENSG00000074071.14|0|1097	-0.679567	3.83725	25.242	9.10587e-07	2.95312e-06
ENSG00000074201.8|mRNA|CLNS1A|ENSG00000074201.8|ENSG00000074201.8|0|4592	0.338555	8.636	13.1173	0.000348195	0.000703551
ENSG00000074219.13|mRNA|TEAD2|ENSG00000074219.13|ENSG00000074219.13|0|2980	-1.4508	1.84124	41.442	5.37139e-10	3.25927e-09
ENSG00000074266.19|mRNA|EED|ENSG00000074266.19|ENSG00000074266.19|0|7016	0.280905	5.64074	6.8878	0.0091628	0.0140427
ENSG00000074319.12|mRNA|TSG101|ENSG00000074319.12|ENSG00000074319.12|0|3839	-0.208306	5.2523	6.01152	0.0148336	0.0218328
ENSG00000074356.16|mRNA|NCBP3|ENSG00000074356.16|ENSG00000074356.16|0|14718	-0.196242	5.90714	5.37153	0.0212008	0.0302944
ENSG00000074370.17|mRNA|ATP2A3|ENSG00000074370.17|ENSG00000074370.17|0|6893	1.69206	8.43288	63.6871	3.95055e-14	7.48278e-13
ENSG00000074416.13|mRNA|MGLL|ENSG00000074416.13|ENSG00000074416.13|0|10102	1.4699	7.67582	67.1026	9.73655e-15	2.18197e-13
ENSG00000074603.18|mRNA|DPP8|ENSG00000074603.18|ENSG00000074603.18|0|10211	0.276088	6.23008	10.1699	0.00159229	0.00283327
ENSG00000074621.13|mRNA|SLC24A1|ENSG00000074621.13|ENSG00000074621.13|0|9084	-1.32192	3.34435	61.0718	1.1665e-13	1.95675e-12
ENSG00000074657.13|mRNA|ZNF532|ENSG00000074657.13|ENSG00000074657.13|0|11951	-1.22156	2.96895	42.9182	2.79135e-10	1.8029e-09
ENSG00000074660.15|mRNA|SCARF1|ENSG00000074660.15|ENSG00000074660.15|0|4961	0.945211	3.63539	30.9272	6.33293e-08	2.52975e-07
ENSG00000074695.5|mRNA|LMAN1|ENSG00000074695.5|ENSG00000074695.5|0|6767	0.990486	6.33285	65.5238	1.85676e-14	3.8416e-13
ENSG00000074696.12|mRNA|HACD3|ENSG00000074696.12|ENSG00000074696.12|0|7097	-0.574003	1.94954	5.93231	0.0155	0.0227347
ENSG00000074706.13|mRNA|IPCEF1|ENSG00000074706.13|ENSG00000074706.13|0|8474	0.728602	6.26438	28.5058	1.95518e-07	7.14867e-07
ENSG00000074755.14|mRNA|ZZEF1|ENSG00000074755.14|ENSG00000074755.14|0|15878	0.5591	6.69069	23.3416	2.25432e-06	6.79703e-06
ENSG00000074800.13|mRNA|ENO1|ENSG00000074800.13|ENSG00000074800.13|0|3958	0.00781443	8.49663	0.00897876	0.924577	0.938076
ENSG00000074842.7|mRNA|MYDGF|ENSG00000074842.7|ENSG00000074842.7|0|1678	-0.72926	2.47475	9.67272	0.00206636	0.00359003
ENSG00000074935.13|mRNA|TUBE1|ENSG00000074935.13|ENSG00000074935.13|0|6973	-1.03638	2.80797	34.7901	1.07316e-08	4.95352e-08
ENSG00000074964.16|mRNA|ARHGEF10L|ENSG00000074964.16|ENSG00000074964.16|0|7817	-0.710212	2.46383	11.1097	0.000976358	0.00180711
ENSG00000074966.10|mRNA|TXK|ENSG00000074966.10|ENSG00000074966.10|0|3472	0.161898	5.71358	2.47003	0.117183	0.145241
ENSG00000075089.9|mRNA|ACTR6|ENSG00000075089.9|ENSG00000075089.9|0|3813	-0.131472	4.62796	1.67565	0.196587	0.233472
ENSG00000075131.9|mRNA|TIPIN|ENSG00000075131.9|ENSG00000075131.9|0|2755	0.355969	3.84607	6.87154	0.0113461	0.0170804
ENSG00000075142.13|mRNA|SRI|ENSG00000075142.13|ENSG00000075142.13|0|4237	-0.899196	4.71529	51.6822	6.1453e-12	6.12533e-11
ENSG00000075151.20|mRNA|EIF4G3|ENSG00000075151.20|ENSG00000075151.20|0|9596	1.18399	10.2569	48.6215	2.29913e-11	1.9447e-10
ENSG00000075188.8|mRNA|NUP37|ENSG00000075188.8|ENSG00000075188.8|0|3492	-0.817092	2.72934	24.9582	1.04204e-06	3.34026e-06
ENSG00000075223.13|mRNA|SEMA3C|ENSG00000075223.13|ENSG00000075223.13|0|6268	0.367886	2.23963	1.65607	0.199215	0.236368
ENSG00000075234.16|mRNA|TTC38|ENSG00000075234.16|ENSG00000075234.16|0|3578	-1.26925	3.31906	57.1785	5.94707e-13	7.87088e-12
ENSG00000075239.13|mRNA|ACAT1|ENSG00000075239.13|ENSG00000075239.13|0|5584	-1.09969	4.44136	63.0893	5.0559e-14	9.31976e-13
ENSG00000075240.16|mRNA|GRAMD4|ENSG00000075240.16|ENSG00000075240.16|0|4885	-0.0492638	3.082	0.0377265	0.846136	0.869414
ENSG00000075292.18|mRNA|ZNF638|ENSG00000075292.18|ENSG00000075292.18|0|12474	0.0612485	7.01575	0.650069	0.420783	0.465553
ENSG00000075303.12|mRNA|SLC25A40|ENSG00000075303.12|ENSG00000075303.12|0|5081	-0.239124	3.88502	3.58113	0.0594877	0.0781042
ENSG00000075336.11|mRNA|TIMM21|ENSG00000075336.11|ENSG00000075336.11|0|5208	-1.22771	3.06452	39.6948	1.17097e-09	6.5512e-09
ENSG00000075340.22|mRNA|ADD2|ENSG00000075340.22|ENSG00000075340.22|0|12673	-1.52498	3.08923	65.5002	1.87476e-14	3.86282e-13
ENSG00000075391.16|mRNA|RASAL2|ENSG00000075391.16|ENSG00000075391.16|0|16044	0.498787	3.47448	11.1136	0.000974396	0.00180382
ENSG00000075399.13|mRNA|VPS9D1|ENSG00000075399.13|ENSG00000075399.13|0|3428	0.952688	3.89244	31.5179	4.81868e-08	1.9646e-07
ENSG00000075407.18|mRNA|ZNF37A|ENSG00000075407.18|ENSG00000075407.18|0|13190	-0.636657	2.71914	13.3047	0.00031652	0.000643789
ENSG00000075413.17|mRNA|MARK3|ENSG00000075413.17|ENSG00000075413.17|0|8891	0.28	7.37735	10.4814	0.00135327	0.0024444
ENSG00000075415.12|mRNA|SLC25A3|ENSG00000075415.12|ENSG00000075415.12|0|8896	-1.08207	6.13086	132.374	2.81009e-25	4.87367e-23
ENSG00000075420.12|mRNA|FNDC3B|ENSG00000075420.12|ENSG00000075420.12|0|13270	-0.886906	5.91495	66.1779	1.42047e-14	3.03658e-13
ENSG00000075426.11|mRNA|FOSL2|ENSG00000075426.11|ENSG00000075426.11|0|7157	-0.611275	4.00989	10.9573	0.00105659	0.00194282
ENSG00000075539.14|mRNA|FRYL|ENSG00000075539.14|ENSG00000075539.14|0|18161	0.0490547	6.71402	0.301974	0.583093	0.624787
ENSG00000075568.16|mRNA|TMEM131|ENSG00000075568.16|ENSG00000075568.16|0|12985	0.322888	5.47549	6.37451	0.0121387	0.0181762
ENSG00000075618.17|mRNA|FSCN1|ENSG00000075618.17|ENSG00000075618.17|0|3692	-1.42062	2.60711	45.5555	8.74415e-11	6.40713e-10
ENSG00000075624.13|mRNA|ACTB|ENSG00000075624.13|ENSG00000075624.13|0|3256	0.515982	12.8996	23.5493	2.04083e-06	6.19267e-06
ENSG00000075651.15|mRNA|PLD1|ENSG00000075651.15|ENSG00000075651.15|0|12859	-1.56105	3.32427	88.6043	2.00049e-18	1.14326e-16
ENSG00000075702.16|mRNA|WDR62|ENSG00000075702.16|ENSG00000075702.16|0|9775	-0.128783	2.45058	0.609427	0.435674	0.480668
ENSG00000075711.20|mRNA|DLG1|ENSG00000075711.20|ENSG00000075711.20|0|11001	0.827004	7.817	48.7223	2.20093e-11	1.87261e-10
ENSG00000075785.12|mRNA|RAB7A|ENSG00000075785.12|ENSG00000075785.12|0|2717	0.0710496	7.95051	0.775417	0.379314	0.423524
ENSG00000075790.10|mRNA|BCAP29|ENSG00000075790.10|ENSG00000075790.10|0|8409	1.23135	6.21424	74.5152	4.9009e-16	1.49462e-14
ENSG00000075826.16|mRNA|SEC31B|ENSG00000075826.16|ENSG00000075826.16|0|7938	1.11289	2.59306	10.0923	0.00165825	0.00293859
ENSG00000075856.11|mRNA|SART3|ENSG00000075856.11|ENSG00000075856.11|0|7271	-0.499632	5.478	24.6161	1.22627e-06	3.88343e-06
ENSG00000075884.13|mRNA|ARHGAP15|ENSG00000075884.13|ENSG00000075884.13|0|6226	-0.343713	6.57702	16.2151	7.31537e-05	0.000167842
ENSG00000075914.12|mRNA|EXOSC7|ENSG00000075914.12|ENSG00000075914.12|0|4442	-1.19939	3.23733	50.2428	1.14097e-11	1.04773e-10
ENSG00000075945.12|mRNA|KIFAP3|ENSG00000075945.12|ENSG00000075945.12|0|4978	1.25324	7.8341	54.2751	2.03123e-12	2.31238e-11
ENSG00000075975.15|mRNA|MKRN2|ENSG00000075975.15|ENSG00000075975.15|0|2848	-1.20337	3.48709	76.294	2.41615e-16	8.26588e-15
ENSG00000076003.4|mRNA|MCM6|ENSG00000076003.4|ENSG00000076003.4|0|4118	0.953003	6.57915	40.8581	6.96551e-10	4.1188e-09
ENSG00000076043.9|mRNA|REXO2|ENSG00000076043.9|ENSG00000076043.9|0|3699	0.345451	4.9397	7.06226	0.00833214	0.0128606
ENSG00000076053.10|mRNA|RBM7|ENSG00000076053.10|ENSG00000076053.10|0|7885	-0.436343	5.31636	14.6147	0.000163099	0.000351297
ENSG00000076067.12|mRNA|RBMS2|ENSG00000076067.12|ENSG00000076067.12|0|8808	-0.889272	4.76659	38.9946	1.60251e-09	8.73041e-09
ENSG00000076108.11|mRNA|BAZ2A|ENSG00000076108.11|ENSG00000076108.11|0|10918	-0.155795	6.84967	2.03779	0.154565	0.187131
ENSG00000076201.14|mRNA|PTPN23|ENSG00000076201.14|ENSG00000076201.14|0|5981	-0.181348	4.05294	1.17505	0.279313	0.320517
ENSG00000076242.14|mRNA|MLH1|ENSG00000076242.14|ENSG00000076242.14|0|3532	-0.451809	4.73089	20.1116	1.0732e-05	2.87161e-05
ENSG00000076248.10|mRNA|UNG|ENSG00000076248.10|ENSG00000076248.10|0|2567	-1.06898	2.30726	30.2666	8.60352e-08	3.35938e-07
ENSG00000076321.10|mRNA|KLHL20|ENSG00000076321.10|ENSG00000076321.10|0|4254	-0.563755	2.99575	11.3298	0.000871204	0.00162516
ENSG00000076356.6|mRNA|PLXNA2|ENSG00000076356.6|ENSG00000076356.6|0|13781	0.708648	2.96222	14.918	0.000140015	0.000305435
ENSG00000076382.16|mRNA|SPAG5|ENSG00000076382.16|ENSG00000076382.16|0|5472	-0.58749	2.61681	10.3326	0.00146251	0.00262364
ENSG00000076513.16|mRNA|ANKRD13A|ENSG00000076513.16|ENSG00000076513.16|0|7350	-0.457783	6.30947	32.1495	3.60049e-08	1.50108e-07
ENSG00000076554.15|mRNA|TPD52|ENSG00000076554.15|ENSG00000076554.15|0|8197	-0.876421	5.98713	38.9048	1.66835e-09	9.04957e-09
ENSG00000076555.15|mRNA|ACACB|ENSG00000076555.15|ENSG00000076555.15|0|14505	-0.887614	3.74498	31.8273	4.1771e-08	1.72168e-07
ENSG00000076604.14|mRNA|TRAF4|ENSG00000076604.14|ENSG00000076604.14|0|4596	-0.137888	2.83719	0.180115	0.671605	0.709002
ENSG00000076641.4|mRNA|PAG1|ENSG00000076641.4|ENSG00000076641.4|0|11023	0.452214	3.59004	5.79289	0.0167492	0.0244216
ENSG00000076650.6|mRNA|GPATCH1|ENSG00000076650.6|ENSG00000076650.6|0|4488	0.125176	6.23627	1.29603	0.255929	0.295913
ENSG00000076662.9|mRNA|ICAM3|ENSG00000076662.9|ENSG00000076662.9|0|2950	-1.37676	5.10163	93.502	3.11316e-19	2.10481e-17
ENSG00000076685.18|mRNA|NT5C2|ENSG00000076685.18|ENSG00000076685.18|0|5156	0.499346	6.61279	27.2529	3.51977e-07	1.23053e-06
ENSG00000076770.14|mRNA|MBNL3|ENSG00000076770.14|ENSG00000076770.14|0|12199	0.387252	8.3153	9.18572	0.00267101	0.00454279
ENSG00000076924.11|mRNA|XAB2|ENSG00000076924.11|ENSG00000076924.11|0|4673	-0.932848	4.74364	56.7446	7.14003e-13	9.18761e-12
ENSG00000076928.17|mRNA|ARHGEF1|ENSG00000076928.17|ENSG00000076928.17|0|8636	-0.720552	6.84011	21.8037	4.7236e-06	1.34878e-05
ENSG00000076944.15|mRNA|STXBP2|ENSG00000076944.15|ENSG00000076944.15|0|6036	0.81579	8.13677	46.2672	6.40473e-11	4.85343e-10
ENSG00000076984.17|mRNA|MAP2K7|ENSG00000076984.17|ENSG00000076984.17|0|5145	-0.972695	4.75506	53.5337	2.78478e-12	3.0351e-11
ENSG00000077044.10|mRNA|DGKD|ENSG00000077044.10|ENSG00000077044.10|0|9771	0.938807	8.38679	48.2634	2.68535e-11	2.2335e-10
ENSG00000077097.15|mRNA|TOP2B|ENSG00000077097.15|ENSG00000077097.15|0|6044	-0.32187	7.59633	13.1896	0.000335606	0.000679855
ENSG00000077147.14|mRNA|TM9SF3|ENSG00000077147.14|ENSG00000077147.14|0|7095	0.70789	7.01199	47.2905	4.09877e-11	3.24405e-10
ENSG00000077150.18|mRNA|NFKB2|ENSG00000077150.18|ENSG00000077150.18|0|4484	-1.04694	4.69929	50.7981	8.98378e-12	8.55282e-11
ENSG00000077157.21|mRNA|PPP1R12B|ENSG00000077157.21|ENSG00000077157.21|0|21069	-0.0765578	3.98289	0.320035	0.572047	0.614139
ENSG00000077232.17|mRNA|DNAJC10|ENSG00000077232.17|ENSG00000077232.17|0|21835	-0.0592161	5.25735	0.173717	0.677153	0.714027
ENSG00000077235.17|mRNA|GTF3C1|ENSG00000077235.17|ENSG00000077235.17|0|11562	0.174301	4.79255	1.36678	0.243376	0.283024
ENSG00000077238.13|mRNA|IL4R|ENSG00000077238.13|ENSG00000077238.13|0|5894	-1.06217	3.41218	35.8905	6.50468e-09	3.13523e-08
ENSG00000077254.14|mRNA|USP33|ENSG00000077254.14|ENSG00000077254.14|0|6918	0.868664	8.24455	53.628	2.67514e-12	2.93002e-11
ENSG00000077312.8|mRNA|SNRPA|ENSG00000077312.8|ENSG00000077312.8|0|2361	-1.47016	3.43479	78.4768	1.0196e-16	3.90324e-15
ENSG00000077348.8|mRNA|EXOSC5|ENSG00000077348.8|ENSG00000077348.8|0|1488	-1.36153	2.25543	37.4653	3.18896e-09	1.64181e-08
ENSG00000077380.15|mRNA|DYNC1I2|ENSG00000077380.15|ENSG00000077380.15|0|4695	0.371174	7.81201	17.0488	4.83346e-05	0.000114862
ENSG00000077420.15|mRNA|APBB1IP|ENSG00000077420.15|ENSG00000077420.15|0|3981	-0.766888	7.10493	43.5337	2.12686e-10	1.4126e-09
ENSG00000077454.15|mRNA|LRCH4|ENSG00000077454.15|ENSG00000077454.15|0|6838	-0.732802	5.19452	22.1318	4.03196e-06	1.16598e-05
ENSG00000077458.12|mRNA|FAM76B|ENSG00000077458.12|ENSG00000077458.12|0|6042	-0.40014	4.86409	17.4802	3.90392e-05	9.43573e-05
ENSG00000077463.14|mRNA|SIRT6|ENSG00000077463.14|ENSG00000077463.14|0|2787	-1.05334	2.09674	25.3661	8.58494e-07	2.79736e-06
ENSG00000077514.8|mRNA|POLD3|ENSG00000077514.8|ENSG00000077514.8|0|5508	-0.942107	3.16215	32.2165	3.49093e-08	1.45968e-07
ENSG00000077549.17|mRNA|CAPZB|ENSG00000077549.17|ENSG00000077549.17|0|3238	0.376785	8.91424	16.3661	6.78523e-05	0.000156597
ENSG00000077585.13|mRNA|GPR137B|ENSG00000077585.13|ENSG00000077585.13|0|2309	0.837187	5.62753	29.2321	1.39254e-07	5.2207e-07
ENSG00000077684.15|mRNA|JADE1|ENSG00000077684.15|ENSG00000077684.15|0|9129	-1.06764	3.88767	56.2256	8.88813e-13	1.11748e-11
ENSG00000077713.18|mRNA|SLC25A43|ENSG00000077713.18|ENSG00000077713.18|0|3115	0.499186	4.50844	13.9413	0.000229153	0.000479434
ENSG00000077721.15|mRNA|UBE2A|ENSG00000077721.15|ENSG00000077721.15|0|5276	-0.409911	4.47581	12.557	0.000463497	0.000913845
ENSG00000077984.5|mRNA|CST7|ENSG00000077984.5|ENSG00000077984.5|0|930	-0.551427	5.38385	17.7047	3.49389e-05	8.51382e-05
ENSG00000078018.19|mRNA|MAP2|ENSG00000078018.19|ENSG00000078018.19|0|11559	1.47993	3.84987	58.6772	3.16895e-13	4.60676e-12
ENSG00000078043.15|mRNA|PIAS2|ENSG00000078043.15|ENSG00000078043.15|0|17527	0.345811	4.86151	9.75584	0.00197807	0.00344715
ENSG00000078061.12|mRNA|ARAF|ENSG00000078061.12|ENSG00000078061.12|0|3535	0.0592081	5.80338	0.356227	0.551099	0.593984
ENSG00000078070.12|mRNA|MCCC1|ENSG00000078070.12|ENSG00000078070.12|0|4321	-0.022849	4.83679	0.0497391	0.823683	0.849142
ENSG00000078114.18|mRNA|NEBL|ENSG00000078114.18|ENSG00000078114.18|0|13654	-1.97021	2.19444	74.5182	4.89508e-16	1.49462e-14
ENSG00000078124.11|mRNA|ACER3|ENSG00000078124.11|ENSG00000078124.11|0|8442	0.943084	5.46726	24.1028	1.56635e-06	4.85485e-06
ENSG00000078140.13|mRNA|UBE2K|ENSG00000078140.13|ENSG00000078140.13|0|5245	0.893626	8.50647	44.5354	1.36814e-10	9.5112e-10
ENSG00000078142.12|mRNA|PIK3C3|ENSG00000078142.12|ENSG00000078142.12|0|15198	0.978266	8.54652	49.359	1.6709e-11	1.46488e-10
ENSG00000078177.13|mRNA|N4BP2|ENSG00000078177.13|ENSG00000078177.13|0|9835	0.0771587	4.38789	0.169778	0.68063	0.71739
ENSG00000078237.6|mRNA|TIGAR|ENSG00000078237.6|ENSG00000078237.6|0|4017	-0.932381	3.00007	26.8344	4.2867e-07	1.4764e-06
ENSG00000078246.16|mRNA|TULP3|ENSG00000078246.16|ENSG00000078246.16|0|3181	-1.02516	3.11425	29.4889	1.23538e-07	4.68522e-07
ENSG00000078269.14|mRNA|SYNJ2|ENSG00000078269.14|ENSG00000078269.14|0|12493	0.414106	4.07483	8.42765	0.00399446	0.00655555
ENSG00000078304.19|mRNA|PPP2R5C|ENSG00000078304.19|ENSG00000078304.19|0|14289	-0.808485	7.33179	85.726	6.0429e-18	3.15512e-16
ENSG00000078319.9|pseudogene|PMS2P1|ENSG00000078319.9|ENSG00000078319.9|0|1228	-0.157455	4.64974	2.5058	0.114575	0.142344
ENSG00000078369.17|mRNA|GNB1|ENSG00000078369.17|ENSG00000078369.17|0|6417	0.396845	9.84173	20.2366	1.00982e-05	2.71184e-05
ENSG00000078403.16|mRNA|MLLT10|ENSG00000078403.16|ENSG00000078403.16|0|6945	0.414764	6.29798	14.0225	0.000219926	0.000461486
ENSG00000078487.17|mRNA|ZCWPW1|ENSG00000078487.17|ENSG00000078487.17|0|3318	-0.301802	3.55716	6.9063	0.00907082	0.0139169
ENSG00000078589.12|mRNA|P2RY10|ENSG00000078589.12|ENSG00000078589.12|0|1803	0.531757	3.96612	9.16109	0.002706	0.00459839
ENSG00000078596.10|mRNA|ITM2A|ENSG00000078596.10|ENSG00000078596.10|0|2051	1.03743	5.29782	44.0207	1.71597e-10	1.16491e-09
ENSG00000078618.21|mRNA|NRDC|ENSG00000078618.21|ENSG00000078618.21|0|6773	1.22501	9.31385	76.1564	2.55161e-16	8.5821e-15
ENSG00000078668.13|mRNA|VDAC3|ENSG00000078668.13|ENSG00000078668.13|0|3141	1.15474	9.0023	56.6722	7.36122e-13	9.44111e-12
ENSG00000078674.17|mRNA|PCM1|ENSG00000078674.17|ENSG00000078674.17|0|14445	-0.155146	8.04725	3.0414	0.0822808	0.10509
ENSG00000078687.17|mRNA|TNRC6C|ENSG00000078687.17|ENSG00000078687.17|0|11111	0.330486	6.85044	12.3521	0.000514758	0.0010039
ENSG00000078699.21|mRNA|CBFA2T2|ENSG00000078699.21|ENSG00000078699.21|0|9457	0.119584	4.89819	1.09334	0.296649	0.338617
ENSG00000078747.14|mRNA|ITCH|ENSG00000078747.14|ENSG00000078747.14|0|6664	0.221653	7.48035	6.4815	0.0114452	0.0172178
ENSG00000078804.12|mRNA|TP53INP2|ENSG00000078804.12|ENSG00000078804.12|0|4228	0.0919058	3.64476	0.378771	0.538769	0.582394
ENSG00000078808.16|mRNA|SDF4|ENSG00000078808.16|ENSG00000078808.16|0|4709	-0.161623	5.31661	2.63569	0.818233	0.844047
ENSG00000078902.15|mRNA|TOLLIP|ENSG00000078902.15|ENSG00000078902.15|0|5983	0.752385	5.4031	34.5693	1.18686e-08	5.43684e-08
ENSG00000078967.12|mRNA|UBE2D4|ENSG00000078967.12|ENSG00000078967.12|0|4713	-0.669484	3.25799	22.7402	3.00846e-06	8.8645e-06
ENSG00000079102.16|mRNA|RUNX1T1|ENSG00000079102.16|ENSG00000079102.16|0|13535	-1.27915	3.71578	63.7203	3.89692e-14	7.39525e-13
ENSG00000079134.11|mRNA|THOC1|ENSG00000079134.11|ENSG00000079134.11|0|8102	-0.498424	4.47099	19.9953	1.13573e-05	3.02795e-05
ENSG00000079156.16|mRNA|OSBPL6|ENSG00000079156.16|ENSG00000079156.16|0|11486	1.27135	2.36759	30.5661	7.48665e-08	2.95101e-07
ENSG00000079246.15|mRNA|XRCC5|ENSG00000079246.15|ENSG00000079246.15|0|5463	-0.519743	7.97525	37.7314	2.82832e-09	1.46903e-08
ENSG00000079257.7|mRNA|LXN|ENSG00000079257.7|ENSG00000079257.7|0|1504	0.712567	3.74566	14.9631	0.000136876	0.00029921
ENSG00000079263.18|mRNA|SP140|ENSG00000079263.18|ENSG00000079263.18|0|5582	-1.13715	6.00734	80.8563	4.00612e-17	1.6857e-15
ENSG00000079277.19|mRNA|MKNK1|ENSG00000079277.19|ENSG00000079277.19|0|8070	0.627196	5.91091	37.3323	3.38624e-09	1.7326e-08
ENSG00000079308.16|mRNA|TNS1|ENSG00000079308.16|ENSG00000079308.16|0|15595	0.0748902	7.44431	0.444626	0.505456	0.549361
ENSG00000079313.13|mRNA|REXO1|ENSG00000079313.13|ENSG00000079313.13|0|5199	-0.541285	3.82484	10.3371	0.00145909	0.00261846
ENSG00000079332.14|mRNA|SAR1A|ENSG00000079332.14|ENSG00000079332.14|0|6914	0.0121553	5.6673	0.0199577	0.887758	0.906576
ENSG00000079335.18|mRNA|CDC14A|ENSG00000079335.18|ENSG00000079335.18|0|5579	0.543598	5.86204	24.445	1.33045e-06	4.18415e-06
ENSG00000079337.15|mRNA|RAPGEF3|ENSG00000079337.15|ENSG00000079337.15|0|12078	-0.925855	2.14166	15.4241	0.00010861	0.000241578
ENSG00000079387.13|mRNA|SENP1|ENSG00000079387.13|ENSG00000079387.13|0|6342	0.631109	6.0197	27.3623	3.34316e-07	1.17414e-06
ENSG00000079432.7|mRNA|CIC|ENSG00000079432.7|ENSG00000079432.7|0|9494	0.128014	5.82208	1.43552	0.231895	0.271032
ENSG00000079459.12|mRNA|FDFT1|ENSG00000079459.12|ENSG00000079459.12|0|5202	-0.961993	5.87314	105.868	3.17521e-21	3.03012e-19
ENSG00000079462.7|mRNA|PAFAH1B3|ENSG00000079462.7|ENSG00000079462.7|0|1419	-1.41653	2.22528	49.958	1.29007e-11	1.16903e-10
ENSG00000079482.12|mRNA|OPHN1|ENSG00000079482.12|ENSG00000079482.12|0|8224	1.33103	7.84188	44.0228	1.71432e-10	1.16419e-09
ENSG00000079616.12|mRNA|KIF22|ENSG00000079616.12|ENSG00000079616.12|0|4312	-0.994266	3.50791	36.2393	5.55254e-09	2.71968e-08
ENSG00000079691.17|mRNA|CARMIL1|ENSG00000079691.17|ENSG00000079691.17|0|6799	0.968397	5.44682	50.9148	8.54379e-12	8.17687e-11
ENSG00000079739.15|mRNA|PGM1|ENSG00000079739.15|ENSG00000079739.15|0|4090	-0.0989197	4.78803	0.640018	0.424394	0.469157
ENSG00000079785.14|mRNA|DDX1|ENSG00000079785.14|ENSG00000079785.14|0|3833	-0.777906	5.81858	45.1779	1.03181e-10	7.38671e-10
ENSG00000079805.16|mRNA|DNM2|ENSG00000079805.16|ENSG00000079805.16|0|13443	-0.424164	6.77208	13.5574	0.000278379	0.00057228
ENSG00000079819.18|mRNA|EPB41L2|ENSG00000079819.18|ENSG00000079819.18|0|10320	-0.691345	6.82437	38.21	2.27987e-09	1.20583e-08
ENSG00000079841.18|mRNA|RIMS1|ENSG00000079841.18|ENSG00000079841.18|0|12788	-2.73927	1.82632	138.922	3.08248e-26	5.96893e-24
ENSG00000079950.13|mRNA|STX7|ENSG00000079950.13|ENSG00000079950.13|0|16387	0.671241	8.07576	31.232	5.49963e-08	2.21686e-07
ENSG00000079974.17|mRNA|RABL2B|ENSG00000079974.17|ENSG00000079974.17|0|5870	-0.524778	3.08144	9.46969	0.00229934	0.00395587
ENSG00000079999.13|mRNA|KEAP1|ENSG00000079999.13|ENSG00000079999.13|0|3761	-0.796165	3.21352	27.9522	2.5341e-07	9.0741e-07
ENSG00000080007.7|mRNA|DDX43|ENSG00000080007.7|ENSG00000080007.7|0|2807	0.407652	2.46167	2.44353	0.119158	0.147423
ENSG00000080189.14|mRNA|SLC35C2|ENSG00000080189.14|ENSG00000080189.14|0|7708	0.117156	3.11681	0.389695	0.532976	0.57682
ENSG00000080200.9|mRNA|CRYBG3|ENSG00000080200.9|ENSG00000080200.9|0|10929	-0.271134	3.73726	1.65819	0.198928	0.236056
ENSG00000080298.15|mRNA|RFX3|ENSG00000080298.15|ENSG00000080298.15|0|11169	0.61321	4.65611	21.7585	4.82783e-06	1.37716e-05
ENSG00000080345.17|mRNA|RIF1|ENSG00000080345.17|ENSG00000080345.17|0|18166	0.208212	5.75306	4.85664	0.028367	0.0395346
ENSG00000080371.5|mRNA|RAB21|ENSG00000080371.5|ENSG00000080371.5|0|16036	0.634103	7.08714	36.6939	4.51903e-09	2.25274e-08
ENSG00000080503.22|mRNA|SMARCA2|ENSG00000080503.22|ENSG00000080503.22|0|18595	0.686	9.25822	40.3952	8.56259e-10	4.93444e-09
ENSG00000080546.13|mRNA|SESN1|ENSG00000080546.13|ENSG00000080546.13|0|5121	-0.619631	3.87624	21.8865	4.53856e-06	1.29836e-05
ENSG00000080603.16|mRNA|SRCAP|ENSG00000080603.16|ENSG00000080603.16|0|13674	-0.00826281	6.47888	0.00584763	0.939101	0.950635
ENSG00000080608.9|mRNA|PUM3|ENSG00000080608.9|ENSG00000080608.9|0|2707	-0.398274	5.42882	16.8593	5.30992e-05	0.000125155
ENSG00000080802.18|mRNA|CNOT4|ENSG00000080802.18|ENSG00000080802.18|0|6999	0.0143486	5.18094	0.0263249	0.967741	0.974237
ENSG00000080815.18|mRNA|PSEN1|ENSG00000080815.18|ENSG00000080815.18|0|9947	0.0997805	5.98271	1.40172	0.237456	0.276865
ENSG00000080819.6|mRNA|CPOX|ENSG00000080819.6|ENSG00000080819.6|0|3666	0.186923	5.18044	2.73272	0.0994507	0.124919
ENSG00000080822.16|mRNA|CLDND1|ENSG00000080822.16|ENSG00000080822.16|0|5217	0.417654	5.0915	11.0122	0.00102693	0.00189438
ENSG00000080824.18|mRNA|HSP90AA1|ENSG00000080824.18|ENSG00000080824.18|0|5248	-0.34099	9.71739	13.3266	0.000313022	0.000637388
ENSG00000080839.11|mRNA|RBL1|ENSG00000080839.11|ENSG00000080839.11|0|5954	0.828562	7.23379	56.1202	9.29283e-13	1.16259e-11
ENSG00000080845.17|mRNA|DLGAP4|ENSG00000080845.17|ENSG00000080845.17|0|8789	-0.306553	4.62865	8.11752	0.00471461	0.00762017
ENSG00000080947.14|pseudogene|CROCCP3|ENSG00000080947.14|ENSG00000080947.14|0|6813	0.0181172	1.65316	0.00344311	0.953251	0.962371
ENSG00000080986.12|mRNA|NDC80|ENSG00000080986.12|ENSG00000080986.12|0|3600	-0.29707	3.70781	4.88382	0.0279317	0.0389742
ENSG00000081014.10|mRNA|AP4E1|ENSG00000081014.10|ENSG00000081014.10|0|7359	0.460671	4.58698	16.3012	7.00795e-05	0.00016142
ENSG00000081019.13|mRNA|RSBN1|ENSG00000081019.13|ENSG00000081019.13|0|6819	-0.891177	4.04436	38.3608	2.13026e-09	1.13151e-08
ENSG00000081026.18|mRNA|MAGI3|ENSG00000081026.18|ENSG00000081026.18|0|8180	-0.0219592	2.65194	0.015832	0.899962	0.917441
ENSG00000081059.19|mRNA|TCF7|ENSG00000081059.19|ENSG00000081059.19|0|10063	-1.55904	5.38323	109.023	1.0105e-21	1.10133e-19
ENSG00000081087.14|mRNA|OSTM1|ENSG00000081087.14|ENSG00000081087.14|0|5325	1.12251	4.83485	52.1819	4.96089e-12	5.08192e-11
ENSG00000081154.11|mRNA|PCNP|ENSG00000081154.11|ENSG00000081154.11|0|3102	1.15215	8.80889	73.2957	7.97679e-16	2.32259e-14
ENSG00000081181.7|mRNA|ARG2|ENSG00000081181.7|ENSG00000081181.7|0|2418	1.36903	5.50853	41.8894	4.40323e-10	2.72065e-09
ENSG00000081189.15|mRNA|MEF2C|ENSG00000081189.15|ENSG00000081189.15|0|11755	0.961196	8.65046	62.1418	7.48207e-14	1.31134e-12
ENSG00000081237.18|mRNA|PTPRC|ENSG00000081237.18|ENSG00000081237.18|0|8371	-0.352009	7.65104	4.78507	0.0295478	0.0410769
ENSG00000081307.12|mRNA|UBA5|ENSG00000081307.12|ENSG00000081307.12|0|6827	-0.823792	3.78613	33.6235	1.82901e-08	8.05646e-08
ENSG00000081320.10|mRNA|STK17B|ENSG00000081320.10|ENSG00000081320.10|0|6580	-0.865438	6.87537	56.4863	7.96198e-13	1.00955e-11
ENSG00000081377.16|mRNA|CDC14B|ENSG00000081377.16|ENSG00000081377.16|0|10462	1.43259	8.45852	47.94	3.09015e-11	2.5209e-10
ENSG00000081386.12|mRNA|ZNF510|ENSG00000081386.12|ENSG00000081386.12|0|5921	-1.24022	2.51794	49.1238	1.84977e-11	1.60268e-10
ENSG00000081665.13|mRNA|ZNF506|ENSG00000081665.13|ENSG00000081665.13|0|8414	0.171514	5.04401	2.49291	0.115508	0.143387
ENSG00000081721.11|mRNA|DUSP12|ENSG00000081721.11|ENSG00000081721.11|0|1762	-0.896155	2.87519	36.6306	4.65049e-09	2.31134e-08
ENSG00000081760.16|mRNA|AACS|ENSG00000081760.16|ENSG00000081760.16|0|16094	-0.368635	2.98591	4.77225	0.0297647	0.0413525
ENSG00000081791.8|mRNA|KIAA0141|ENSG00000081791.8|ENSG00000081791.8|0|6047	-1.18442	3.59812	48.4864	2.43786e-11	2.04729e-10
ENSG00000081803.15|mRNA|CADPS2|ENSG00000081803.15|ENSG00000081803.15|0|6351	-1.44396	2.87897	56.0787	9.45725e-13	1.17964e-11
ENSG00000081870.11|mRNA|HSPB11|ENSG00000081870.11|ENSG00000081870.11|0|3236	0.0307284	5.48492	0.083896	0.772303	0.802563
ENSG00000081913.13|mRNA|PHLPP1|ENSG00000081913.13|ENSG00000081913.13|0|9142	0.565354	3.66354	13.1016	0.000350998	0.000708568
ENSG00000081923.11|mRNA|ATP8B1|ENSG00000081923.11|ENSG00000081923.11|0|6652	-1.66082	2.404	67.4257	8.53464e-15	1.94987e-13
ENSG00000082014.16|mRNA|SMARCD3|ENSG00000082014.16|ENSG00000082014.16|0|5198	-1.5466	3.14831	66.392	1.3014e-14	2.80006e-13
ENSG00000082068.8|mRNA|WDR70|ENSG00000082068.8|ENSG00000082068.8|0|7039	-0.355256	4.90475	5.38046	0.0210946	0.0301664
ENSG00000082074.15|mRNA|FYB1|ENSG00000082074.15|ENSG00000082074.15|0|6100	0.835931	10.2824	42.1276	3.96161e-10	2.48005e-09
ENSG00000082146.12|mRNA|STRADB|ENSG00000082146.12|ENSG00000082146.12|0|3242	-0.643508	7.09836	29.7156	1.11159e-07	4.24888e-07
ENSG00000082153.17|mRNA|BZW1|ENSG00000082153.17|ENSG00000082153.17|0|8085	-0.487512	7.01134	45.232	1.00761e-10	7.24994e-10
ENSG00000082212.12|mRNA|ME2|ENSG00000082212.12|ENSG00000082212.12|0|16243	0.414007	7.3905	20.6598	8.21991e-06	2.24399e-05
ENSG00000082213.17|mRNA|C5orf22|ENSG00000082213.17|ENSG00000082213.17|0|4172	-0.0385751	3.99267	0.0709424	0.790169	0.818782
ENSG00000082258.12|mRNA|CCNT2|ENSG00000082258.12|ENSG00000082258.12|0|9081	0.400718	4.17603	9.29914	0.0025157	0.00429991
ENSG00000082269.16|mRNA|FAM135A|ENSG00000082269.16|ENSG00000082269.16|0|10589	-0.417851	3.64189	11.23	0.000917366	0.00170457
ENSG00000082397.17|mRNA|EPB41L3|ENSG00000082397.17|ENSG00000082397.17|0|12203	0.604984	7.01701	19.981	1.14368e-05	3.04794e-05
ENSG00000082438.15|mRNA|COBLL1|ENSG00000082438.15|ENSG00000082438.15|0|17178	-0.57916	4.83113	9.17466	0.00268666	0.00456785
ENSG00000082458.11|mRNA|DLG3|ENSG00000082458.11|ENSG00000082458.11|0|7844	-0.582035	2.44106	9.36323	0.00243206	0.00416659
ENSG00000082512.14|mRNA|TRAF5|ENSG00000082512.14|ENSG00000082512.14|0|9022	-1.02536	4.11128	54.7016	1.69457e-12	1.96959e-11
ENSG00000082515.17|mRNA|MRPL22|ENSG00000082515.17|ENSG00000082515.17|0|5267	-0.687162	4.07541	38.8398	1.71779e-09	9.30255e-09
ENSG00000082516.8|mRNA|GEMIN5|ENSG00000082516.8|ENSG00000082516.8|0|5637	-0.734462	3.1821	20.3537	9.53862e-06	2.57509e-05
ENSG00000082641.15|mRNA|NFE2L1|ENSG00000082641.15|ENSG00000082641.15|0|5825	-0.934277	4.72844	42.8217	2.91303e-10	1.873e-09
ENSG00000082701.14|mRNA|GSK3B|ENSG00000082701.14|ENSG00000082701.14|0|8006	0.664537	6.82199	24.3038	1.42311e-06	4.45518e-06
ENSG00000082781.11|mRNA|ITGB5|ENSG00000082781.11|ENSG00000082781.11|0|6447	1.59019	8.32999	45.2358	1.00594e-10	7.24278e-10
ENSG00000082805.19|mRNA|ERC1|ENSG00000082805.19|ENSG00000082805.19|0|13484	0.125128	6.88728	2.90443	0.089464	0.113422
ENSG00000082898.16|mRNA|XPO1|ENSG00000082898.16|ENSG00000082898.16|0|11708	0.635908	8.73607	29.7928	1.07237e-07	4.11869e-07
ENSG00000082996.19|mRNA|RNF13|ENSG00000082996.19|ENSG00000082996.19|0|3635	0.384854	7.42828	13.4522	0.000293658	0.000601211
ENSG00000083093.9|mRNA|PALB2|ENSG00000083093.9|ENSG00000083093.9|0|4747	-0.324787	2.79521	4.0676	0.0446831	0.060119
ENSG00000083097.14|mRNA|DOPEY1|ENSG00000083097.14|ENSG00000083097.14|0|10045	0.032268	4.76959	0.0692191	0.792674	0.820994
ENSG00000083099.10|mRNA|LYRM2|ENSG00000083099.10|ENSG00000083099.10|0|8679	-0.818073	2.65371	21.1663	6.42928e-06	1.7912e-05
ENSG00000083123.14|mRNA|BCKDHB|ENSG00000083123.14|ENSG00000083123.14|0|4071	-0.0210946	3.51991	0.0205962	0.885989	0.90514
ENSG00000083168.9|mRNA|KAT6A|ENSG00000083168.9|ENSG00000083168.9|0|11852	0.59317	7.27019	27.9429	2.54518e-07	9.10721e-07
ENSG00000083223.17|mRNA|ZCCHC6|ENSG00000083223.17|ENSG00000083223.17|0|6707	0.489247	8.05926	34.1805	1.41752e-08	6.39074e-08
ENSG00000083290.19|mRNA|ULK2|ENSG00000083290.19|ENSG00000083290.19|0|9843	-0.603722	4.32742	33.3229	2.09925e-08	9.13185e-08
ENSG00000083312.17|mRNA|TNPO1|ENSG00000083312.17|ENSG00000083312.17|0|11977	0.915044	7.59045	43.6449	2.02506e-10	1.35083e-09
ENSG00000083444.16|mRNA|PLOD1|ENSG00000083444.16|ENSG00000083444.16|0|5320	0.392812	3.68659	7.74975	0.00574387	0.00914895
ENSG00000083454.21|mRNA|P2RX5|ENSG00000083454.21|ENSG00000083454.21|0|4190	-0.766728	3.61909	17.3666	4.12951e-05	9.93883e-05
ENSG00000083457.11|mRNA|ITGAE|ENSG00000083457.11|ENSG00000083457.11|0|6657	0.0647443	3.67845	0.174587	0.676393	0.713338
ENSG00000083520.14|mRNA|DIS3|ENSG00000083520.14|ENSG00000083520.14|0|10835	-0.431609	5.31028	20.6058	8.43821e-06	2.29804e-05
ENSG00000083535.15|mRNA|PIBF1|ENSG00000083535.15|ENSG00000083535.15|0|4253	0.3444	5.8187	12.1623	0.000567397	0.00109839
ENSG00000083544.13|mRNA|TDRD3|ENSG00000083544.13|ENSG00000083544.13|0|6814	0.644614	6.64946	29.5446	1.20375e-07	4.57485e-07
ENSG00000083635.7|mRNA|NUFIP1|ENSG00000083635.7|ENSG00000083635.7|0|3492	-0.00612413	3.5114	0.00226292	0.962093	0.969678
ENSG00000083642.18|mRNA|PDS5B|ENSG00000083642.18|ENSG00000083642.18|0|13212	0.397518	7.13004	19.0034	1.84437e-05	4.73497e-05
ENSG00000083720.12|mRNA|OXCT1|ENSG00000083720.12|ENSG00000083720.12|0|4194	0.198031	4.95703	3.76888	0.053234	0.0705718
ENSG00000083750.12|mRNA|RRAGB|ENSG00000083750.12|ENSG00000083750.12|0|2725	-0.101582	2.3449	0.301326	0.583497	0.625119
ENSG00000083799.17|mRNA|CYLD|ENSG00000083799.17|ENSG00000083799.17|0|12954	-0.546608	6.25783	41.4363	5.38495e-10	3.26651e-09
ENSG00000083814.13|mRNA|ZNF671|ENSG00000083814.13|ENSG00000083814.13|0|3532	-1.23905	2.13206	33.8966	1.6141e-08	7.19079e-08
ENSG00000083828.15|mRNA|ZNF586|ENSG00000083828.15|ENSG00000083828.15|0|3261	0.0584002	3.18672	0.186177	0.666455	0.704124
ENSG00000083844.10|mRNA|ZNF264|ENSG00000083844.10|ENSG00000083844.10|0|12532	-0.525775	2.39054	7.02682	0.00849434	0.0130887
ENSG00000083845.8|mRNA|RPS5|ENSG00000083845.8|ENSG00000083845.8|0|3617	-1.5608	7.79379	159.48	3.74363e-29	1.0734e-26
ENSG00000083896.12|mRNA|YTHDC1|ENSG00000083896.12|ENSG00000083896.12|0|7032	-0.958059	6.9625	76.7985	1.97829e-16	6.97119e-15
ENSG00000083937.8|mRNA|CHMP2B|ENSG00000083937.8|ENSG00000083937.8|0|3106	-0.679806	5.28494	52.68	4.00889e-12	4.20835e-11
ENSG00000084070.11|mRNA|SMAP2|ENSG00000084070.11|ENSG00000084070.11|0|3631	-0.89852	7.47204	58.1014	4.0346e-13	5.64307e-12
ENSG00000084072.16|mRNA|PPIE|ENSG00000084072.16|ENSG00000084072.16|0|8071	0.729091	5.8798	59.3383	2.40304e-13	3.64754e-12
ENSG00000084073.8|mRNA|ZMPSTE24|ENSG00000084073.8|ENSG00000084073.8|0|3572	1.07492	5.57271	41.8428	4.4952e-10	2.76975e-09
ENSG00000084090.13|mRNA|STARD7|ENSG00000084090.13|ENSG00000084090.13|0|4414	-0.994873	5.23096	68.7532	4.9748e-15	1.22045e-13
ENSG00000084092.6|mRNA|NOA1|ENSG00000084092.6|ENSG00000084092.6|0|3415	-1.36569	2.95451	70.8409	2.13813e-15	5.67087e-14
ENSG00000084093.16|mRNA|REST|ENSG00000084093.16|ENSG00000084093.16|0|7983	-0.308603	3.68384	5.34882	0.0214731	0.0306529
ENSG00000084110.10|mRNA|HAL|ENSG00000084110.10|ENSG00000084110.10|0|5146	-0.742711	2.80799	14.0887	0.000212691	0.000447529
ENSG00000084112.14|mRNA|SSH1|ENSG00000084112.14|ENSG00000084112.14|0|14537	0.763478	5.96223	44.2356	1.56102e-10	1.06992e-09
ENSG00000084207.15|mRNA|GSTP1|ENSG00000084207.15|ENSG00000084207.15|0|1915	-1.17562	6.29769	80.4127	4.76574e-17	1.97205e-15
ENSG00000084234.16|mRNA|APLP2|ENSG00000084234.16|ENSG00000084234.16|0|7451	0.01959	6.7937	0.0219244	0.882397	0.901794
ENSG00000084463.7|mRNA|WBP11|ENSG00000084463.7|ENSG00000084463.7|0|5315	0.00655418	6.9122	0.00546061	0.941147	0.95232
ENSG00000084623.11|mRNA|EIF3I|ENSG00000084623.11|ENSG00000084623.11|0|1725	-1.24007	5.45433	81.4982	3.11723e-17	1.36644e-15
ENSG00000084652.15|mRNA|TXLNA|ENSG00000084652.15|ENSG00000084652.15|0|5103	-0.560412	4.85094	21.4846	5.51117e-06	1.55562e-05
ENSG00000084674.14|mRNA|APOB|ENSG00000084674.14|ENSG00000084674.14|0|14828	0.616776	2.61244	1.87185	0.172378	0.206964
ENSG00000084676.15|mRNA|NCOA1|ENSG00000084676.15|ENSG00000084676.15|0|8633	0.46358	7.9181	24.2983	1.42686e-06	4.46553e-06
ENSG00000084693.15|mRNA|AGBL5|ENSG00000084693.15|ENSG00000084693.15|0|5283	0.932695	6.43983	32.4875	3.08143e-08	1.30376e-07
ENSG00000084731.14|mRNA|KIF3C|ENSG00000084731.14|ENSG00000084731.14|0|6403	1.37887	5.29697	41.9153	4.35281e-10	2.69533e-09
ENSG00000084733.10|mRNA|RAB10|ENSG00000084733.10|ENSG00000084733.10|0|3631	0.933666	8.68777	54.4432	1.89114e-12	2.1765e-11
ENSG00000084754.10|mRNA|HADHA|ENSG00000084754.10|ENSG00000084754.10|0|3811	-1.22219	6.88108	129.039	8.78255e-25	1.44767e-22
ENSG00000084764.10|mRNA|MAPRE3|ENSG00000084764.10|ENSG00000084764.10|0|3459	-0.752652	2.1665	15.3195	0.000114457	0.000253425
ENSG00000084774.13|mRNA|CAD|ENSG00000084774.13|ENSG00000084774.13|0|8422	-0.500306	3.46922	6.3124	0.0125612	0.0187595
ENSG00000085063.14|mRNA|CD59|ENSG00000085063.14|ENSG00000085063.14|0|4942	-0.0216055	3.64361	0.0247046	0.87522	0.895193
ENSG00000085117.11|mRNA|CD82|ENSG00000085117.11|ENSG00000085117.11|0|4054	1.48605	5.99911	69.8887	3.14061e-15	8.04101e-14
ENSG00000085185.15|mRNA|BCORL1|ENSG00000085185.15|ENSG00000085185.15|0|7996	0.268021	3.62884	3.59974	0.0588341	0.0773123
ENSG00000085224.21|mRNA|ATRX|ENSG00000085224.21|ENSG00000085224.21|0|19302	0.238854	9.19752	6.78703	0.00968108	0.0147882
ENSG00000085231.13|mRNA|AK6|ENSG00000085231.13|ENSG00000085231.13|0|2162	-0.510276	5.66022	28.9737	1.57105e-07	5.8354e-07
ENSG00000085265.10|mRNA|FCN1|ENSG00000085265.10|ENSG00000085265.10|0|4981	-0.399978	6.35997	4.0098	0.0462163	0.0620355
ENSG00000085274.15|mRNA|MYNN|ENSG00000085274.15|ENSG00000085274.15|0|5730	-1.1654	3.19061	49.9256	1.30823e-11	1.18334e-10
ENSG00000085276.17|mRNA|MECOM|ENSG00000085276.17|ENSG00000085276.17|0|9103	-1.33402	3.49968	61.0455	1.17936e-13	1.97524e-12
ENSG00000085365.17|mRNA|SCAMP1|ENSG00000085365.17|ENSG00000085365.17|0|5106	0.920774	5.43067	38.7112	1.8199e-09	9.79172e-09
ENSG00000085377.13|mRNA|PREP|ENSG00000085377.13|ENSG00000085377.13|0|3762	-0.853989	3.82417	32.8817	2.57059e-08	1.10117e-07
ENSG00000085382.11|mRNA|HACE1|ENSG00000085382.11|ENSG00000085382.11|0|9238	0.322491	5.03101	8.73291	0.00339533	0.00565888
ENSG00000085415.15|mRNA|SEH1L|ENSG00000085415.15|ENSG00000085415.15|0|10481	-0.913419	3.94791	47.4466	3.82956e-11	3.04912e-10
ENSG00000085433.15|mRNA|WDR47|ENSG00000085433.15|ENSG00000085433.15|0|4423	0.0343243	4.46035	0.124427	0.724551	0.758468
ENSG00000085449.14|mRNA|WDFY1|ENSG00000085449.14|ENSG00000085449.14|0|5516	0.238777	5.78938	6.64138	0.0104841	0.0159015
ENSG00000085491.15|mRNA|SLC25A24|ENSG00000085491.15|ENSG00000085491.15|0|6548	-0.826367	5.21402	61.5749	9.46518e-14	1.61655e-12
ENSG00000085511.19|mRNA|MAP3K4|ENSG00000085511.19|ENSG00000085511.19|0|7522	-0.523317	4.18149	16.6161	5.99176e-05	0.000139642
ENSG00000085514.15|mRNA|PILRA|ENSG00000085514.15|ENSG00000085514.15|0|2006	-1.11363	3.98015	38.7954	1.75239e-09	9.45657e-09
ENSG00000085563.14|mRNA|ABCB1|ENSG00000085563.14|ENSG00000085563.14|0|5806	-0.593406	2.6776	7.7767	0.00566118	0.00903008
ENSG00000085662.13|mRNA|AKR1B1|ENSG00000085662.13|ENSG00000085662.13|0|3660	-1.07118	4.07574	85.2264	7.32812e-18	3.71907e-16
ENSG00000085719.12|mRNA|CPNE3|ENSG00000085719.12|ENSG00000085719.12|0|6745	-0.770648	5.19652	49.756	1.40756e-11	1.26174e-10
ENSG00000085721.12|mRNA|RRN3|ENSG00000085721.12|ENSG00000085721.12|0|4156	-0.702754	4.14787	33.5653	1.87849e-08	8.25071e-08
ENSG00000085733.15|mRNA|CTTN|ENSG00000085733.15|ENSG00000085733.15|0|6949	1.54606	10.5593	58.0673	4.09271e-13	5.71632e-12
ENSG00000085760.14|mRNA|MTIF2|ENSG00000085760.14|ENSG00000085760.14|0|3374	-0.85375	4.82999	52.2294	4.86106e-12	5.00019e-11
ENSG00000085788.13|mRNA|DDHD2|ENSG00000085788.13|ENSG00000085788.13|0|10686	-0.365084	5.04931	17.5796	3.7166e-05	9.02126e-05
ENSG00000085832.16|mRNA|EPS15|ENSG00000085832.16|ENSG00000085832.16|0|7440	0.371333	8.7488	17.7848	3.35843e-05	8.2078e-05
ENSG00000085871.8|mRNA|MGST2|ENSG00000085871.8|ENSG00000085871.8|0|3182	-0.0942891	3.04443	0.446035	0.504783	0.548689
ENSG00000085872.14|mRNA|CHERP|ENSG00000085872.14|ENSG00000085872.14|0|6113	-0.64699	4.82832	31.79	4.24962e-08	1.7494e-07
ENSG00000085978.21|mRNA|ATG16L1|ENSG00000085978.21|ENSG00000085978.21|0|6047	0.519926	5.46248	23.7273	1.8742e-06	5.73151e-06
ENSG00000085982.13|mRNA|USP40|ENSG00000085982.13|ENSG00000085982.13|0|9352	-0.471045	3.37327	6.3985	0.0119795	0.0179472
ENSG00000085998.13|mRNA|POMGNT1|ENSG00000085998.13|ENSG00000085998.13|0|6198	0.149842	2.34952	0.241158	0.623762	0.663658
ENSG00000086015.20|mRNA|MAST2|ENSG00000086015.20|ENSG00000086015.20|0|7877	-0.62133	2.91562	16.3297	6.90931e-05	0.000159314
ENSG00000086061.15|mRNA|DNAJA1|ENSG00000086061.15|ENSG00000086061.15|0|2730	-0.854475	7.35256	55.8746	1.03094e-12	1.27714e-11
ENSG00000086062.12|mRNA|B4GALT1|ENSG00000086062.12|ENSG00000086062.12|0|4901	0.852819	4.58563	28.6119	1.86045e-07	6.82609e-07
ENSG00000086065.13|mRNA|CHMP5|ENSG00000086065.13|ENSG00000086065.13|0|2390	0.26612	7.28276	10.3719	0.00143282	0.00257502
ENSG00000086102.18|mRNA|NFX1|ENSG00000086102.18|ENSG00000086102.18|0|7147	0.309417	6.00124	12.2956	0.000529884	0.00103108
ENSG00000086189.9|mRNA|DIMT1|ENSG00000086189.9|ENSG00000086189.9|0|3736	-0.56678	3.74436	20.4633	9.04338e-06	2.44935e-05
ENSG00000086200.16|mRNA|IPO11|ENSG00000086200.16|ENSG00000086200.16|0|7540	0.954741	5.64515	41.0318	6.44698e-10	3.83836e-09
ENSG00000086232.12|mRNA|EIF2AK1|ENSG00000086232.12|ENSG00000086232.12|0|5550	1.30241	10.4454	68.9402	4.61135e-15	1.13828e-13
ENSG00000086288.11|mRNA|NME8|ENSG00000086288.11|ENSG00000086288.11|0|2439	-0.70835	2.18734	8.67273	0.0035057	0.00582289
ENSG00000086289.11|mRNA|EPDR1|ENSG00000086289.11|ENSG00000086289.11|0|2864	0.513543	3.30232	10.7079	0.00120278	0.00219062
ENSG00000086300.15|mRNA|SNX10|ENSG00000086300.15|ENSG00000086300.15|0|3518	-1.26488	5.48189	99.5284	3.26777e-20	2.63869e-18
ENSG00000086475.14|mRNA|SEPHS1|ENSG00000086475.14|ENSG00000086475.14|0|3888	-0.770973	4.21846	30.603	7.35968e-08	2.90556e-07
ENSG00000086504.15|mRNA|MRPL28|ENSG00000086504.15|ENSG00000086504.15|0|2404	-0.73867	4.20948	46.5693	5.6131e-11	4.31752e-10
ENSG00000086506.2|mRNA|HBQ1|ENSG00000086506.2|ENSG00000086506.2|0|536	0.709649	4.8655	18.103	2.87075e-05	7.1065e-05
ENSG00000086589.11|mRNA|RBM22|ENSG00000086589.11|ENSG00000086589.11|0|3615	-0.854096	5.05794	71.7609	1.47629e-15	4.09521e-14
ENSG00000086598.10|mRNA|TMED2|ENSG00000086598.10|ENSG00000086598.10|0|3830	0.492027	7.50204	27.3924	3.29627e-07	1.1593e-06
ENSG00000086619.13|mRNA|ERO1B|ENSG00000086619.13|ENSG00000086619.13|0|5361	0.68933	4.38698	21.5459	5.35005e-06	1.51375e-05
ENSG00000086666.18|mRNA|ZFAND6|ENSG00000086666.18|ENSG00000086666.18|0|5153	0.851193	8.46191	34.185	1.41461e-08	6.38045e-08
ENSG00000086712.12|mRNA|TXLNG|ENSG00000086712.12|ENSG00000086712.12|0|4460	-0.811956	3.9933	44.9606	1.13504e-10	8.0466e-10
ENSG00000086730.16|mRNA|LAT2|ENSG00000086730.16|ENSG00000086730.16|0|4545	-0.487509	4.48281	14.4798	0.00017457	0.000373824
ENSG00000086758.15|mRNA|HUWE1|ENSG00000086758.15|ENSG00000086758.15|0|17380	-0.0241371	7.99406	0.0788576	0.779062	0.808954
ENSG00000086827.8|mRNA|ZW10|ENSG00000086827.8|ENSG00000086827.8|0|2992	-0.519821	3.54098	15.9264	8.44833e-05	0.000191458
ENSG00000086848.14|mRNA|ALG9|ENSG00000086848.14|ENSG00000086848.14|0|8013	-0.259422	3.3626	3.9369	0.0482299	0.0644562
ENSG00000087008.15|mRNA|ACOX3|ENSG00000087008.15|ENSG00000087008.15|0|3846	-0.582386	2.65658	6.81648	0.00952654	0.0145722
ENSG00000087053.18|mRNA|MTMR2|ENSG00000087053.18|ENSG00000087053.18|0|6119	0.950865	6.75978	51.3256	7.16152e-12	6.99494e-11
ENSG00000087074.7|mRNA|PPP1R15A|ENSG00000087074.7|ENSG00000087074.7|0|3093	0.352913	4.63742	7.99925	0.00502317	0.00808547
ENSG00000087086.14|mRNA|FTL|ENSG00000087086.14|ENSG00000087086.14|0|878	-0.586585	10.4341	45.451	9.15384e-11	6.66083e-10
ENSG00000087087.19|mRNA|SRRT|ENSG00000087087.19|ENSG00000087087.19|0|4850	-0.718941	5.69266	25.4224	8.35879e-07	2.7326e-06
ENSG00000087088.19|mRNA|BAX|ENSG00000087088.19|ENSG00000087088.19|0|2587	-0.256926	4.73294	4.97511	0.0265197	0.037134
ENSG00000087095.12|mRNA|NLK|ENSG00000087095.12|ENSG00000087095.12|0|5290	1.22552	8.17584	46.1057	6.87293e-11	5.1709e-10
ENSG00000087111.20|mRNA|PIGS|ENSG00000087111.20|ENSG00000087111.20|0|5990	0.130274	3.15155	0.608117	0.436167	0.481132
ENSG00000087152.15|mRNA|ATXN7L3|ENSG00000087152.15|ENSG00000087152.15|0|5301	0.342743	5.72419	10.1469	0.00161152	0.00286366
ENSG00000087157.18|mRNA|PGS1|ENSG00000087157.18|ENSG00000087157.18|0|4965	0.317633	3.52942	5.06138	0.0252541	0.0355239
ENSG00000087191.12|mRNA|PSMC5|ENSG00000087191.12|ENSG00000087191.12|0|4490	-0.422929	5.95628	25.5075	8.02805e-07	2.63354e-06
ENSG00000087206.16|mRNA|UIMC1|ENSG00000087206.16|ENSG00000087206.16|0|4739	1.17438	9.47692	68.5516	5.39897e-15	1.30366e-13
ENSG00000087237.10|mRNA|CETP|ENSG00000087237.10|ENSG00000087237.10|0|2085	1.40592	5.27451	48.9185	2.02161e-11	1.73424e-10
ENSG00000087253.12|mRNA|LPCAT2|ENSG00000087253.12|ENSG00000087253.12|0|7439	-0.679761	2.17429	8.52922	0.00378395	0.00624087
ENSG00000087258.14|mRNA|GNAO1|ENSG00000087258.14|ENSG00000087258.14|0|13697	1.48037	6.09637	49.6293	1.48673e-11	1.32202e-10
ENSG00000087263.16|mRNA|OGFOD1|ENSG00000087263.16|ENSG00000087263.16|0|5806	-0.324855	4.38215	10.3747	0.00143076	0.00257156
ENSG00000087266.15|mRNA|SH3BP2|ENSG00000087266.15|ENSG00000087266.15|0|13968	-1.04912	5.37752	47.9982	3.0131e-11	2.47147e-10
ENSG00000087269.15|mRNA|NOP14|ENSG00000087269.15|ENSG00000087269.15|0|3538	-0.639999	6.56179	55.7225	1.09942e-12	1.35107e-11
ENSG00000087274.16|mRNA|ADD1|ENSG00000087274.16|ENSG00000087274.16|0|13106	0.188813	8.00273	5.56917	0.0189768	0.0273853
ENSG00000087299.11|mRNA|L2HGDH|ENSG00000087299.11|ENSG00000087299.11|0|6879	0.329531	2.39435	2.73091	0.0995623	0.125041
ENSG00000087301.8|mRNA|TXNDC16|ENSG00000087301.8|ENSG00000087301.8|0|4739	0.373444	6.12482	12.7465	0.000420694	0.000836647
ENSG00000087302.8|mRNA|C14orf166|ENSG00000087302.8|ENSG00000087302.8|0|8323	-0.722447	6.43059	70.5746	2.38058e-15	6.23106e-14
ENSG00000087303.17|mRNA|NID2|ENSG00000087303.17|ENSG00000087303.17|0|6392	1.27076	4.32105	41.3987	5.47584e-10	3.31245e-09
ENSG00000087338.4|mRNA|GMCL1|ENSG00000087338.4|ENSG00000087338.4|0|4922	0.109176	4.52155	1.07388	0.300979	0.343265
ENSG00000087365.15|mRNA|SF3B2|ENSG00000087365.15|ENSG00000087365.15|0|9795	-0.815691	8.02561	57.7841	4.60976e-13	6.33207e-12
ENSG00000087460.24|mRNA|GNAS|ENSG00000087460.24|ENSG00000087460.24|0|13320	1.07437	11.6109	58.0455	4.13027e-13	5.75487e-12
ENSG00000087470.17|mRNA|DNM1L|ENSG00000087470.17|ENSG00000087470.17|0|7282	1.1065	7.67263	52.4017	4.51559e-12	4.68836e-11
ENSG00000087495.16|mRNA|PHACTR3|ENSG00000087495.16|ENSG00000087495.16|0|6095	1.37516	4.88626	45.6929	8.23353e-11	6.07416e-10
ENSG00000087502.17|mRNA|ERGIC2|ENSG00000087502.17|ENSG00000087502.17|0|5826	-0.0504044	5.09411	0.140244	0.708327	0.743283
ENSG00000087586.17|mRNA|AURKA|ENSG00000087586.17|ENSG00000087586.17|0|2928	0.431787	4.63531	10.1405	0.00161697	0.00287257
ENSG00000087589.16|mRNA|CASS4|ENSG00000087589.16|ENSG00000087589.16|0|5069	0.13648	3.3113	0.863857	0.699449	0.73505
ENSG00000087842.10|mRNA|PIR|ENSG00000087842.10|ENSG00000087842.10|0|2512	-0.771861	2.74388	22.0519	4.19046e-06	1.20866e-05
ENSG00000087884.14|mRNA|AAMDC|ENSG00000087884.14|ENSG00000087884.14|0|1943	-0.735525	2.61112	17.8954	3.18008e-05	7.80157e-05
ENSG00000087903.12|mRNA|RFX2|ENSG00000087903.12|ENSG00000087903.12|0|9094	0.814954	4.06035	27.9993	2.47873e-07	8.88859e-07
ENSG00000087995.15|mRNA|METTL2A|ENSG00000087995.15|ENSG00000087995.15|0|3843	-0.978114	2.14038	24.5705	1.25321e-06	3.9606e-06
ENSG00000088035.15|mRNA|ALG6|ENSG00000088035.15|ENSG00000088035.15|0|4950	0.192966	2.23931	1.04181	0.308296	0.350808
ENSG00000088038.17|mRNA|CNOT3|ENSG00000088038.17|ENSG00000088038.17|0|6676	-0.452329	6.07318	23.9701	1.6688e-06	5.14882e-06
ENSG00000088053.11|mRNA|GP6|ENSG00000088053.11|ENSG00000088053.11|0|2703	1.3785	6.48764	43.8015	1.88998e-10	1.26781e-09
ENSG00000088179.8|mRNA|PTPN4|ENSG00000088179.8|ENSG00000088179.8|0|12486	-0.18029	6.50294	4.59928	0.03286	0.0452869
ENSG00000088205.12|mRNA|DDX18|ENSG00000088205.12|ENSG00000088205.12|0|7851	-0.918413	5.36587	54.0857	2.20156e-12	2.47381e-11
ENSG00000088247.17|mRNA|KHSRP|ENSG00000088247.17|ENSG00000088247.17|0|4563	-0.868305	5.98025	62.6163	6.14775e-14	1.09872e-12
ENSG00000088256.8|mRNA|GNA11|ENSG00000088256.8|ENSG00000088256.8|0|6242	-0.816395	2.15911	14.3125	0.000189946	0.000403115
ENSG00000088280.18|mRNA|ASAP3|ENSG00000088280.18|ENSG00000088280.18|0|4988	0.192493	2.50924	0.969784	0.325598	0.368582
ENSG00000088298.12|mRNA|EDEM2|ENSG00000088298.12|ENSG00000088298.12|0|1919	-0.287336	2.60301	2.30661	0.129971	0.159613
ENSG00000088305.18|mRNA|DNMT3B|ENSG00000088305.18|ENSG00000088305.18|0|4630	0.796849	2.38114	15.4227	0.000108686	0.00024172
ENSG00000088325.15|mRNA|TPX2|ENSG00000088325.15|ENSG00000088325.15|0|3605	-0.485463	4.32068	17.9256	3.13304e-05	7.69752e-05
ENSG00000088356.5|mRNA|PDRG1|ENSG00000088356.5|ENSG00000088356.5|0|1998	-1.08811	2.43938	41.6203	4.96203e-10	3.03117e-09
ENSG00000088367.21|mRNA|EPB41L1|ENSG00000088367.21|ENSG00000088367.21|0|9674	-0.498743	2.09178	6.47287	0.0114996	0.0172958
ENSG00000088387.18|mRNA|DOCK9|ENSG00000088387.18|ENSG00000088387.18|0|14816	-0.742555	4.92578	30.1029	9.28315e-08	3.60429e-07
ENSG00000088448.14|mRNA|ANKRD10|ENSG00000088448.14|ENSG00000088448.14|0|4563	0.945862	5.488	44.6936	1.27627e-10	8.95046e-10
ENSG00000088451.10|mRNA|TGDS|ENSG00000088451.10|ENSG00000088451.10|0|2589	-0.38835	3.23728	8.56235	0.00371777	0.0061424
ENSG00000088682.13|mRNA|COQ9|ENSG00000088682.13|ENSG00000088682.13|0|4324	-1.1288	3.87961	64.2449	3.13958e-14	6.10916e-13
ENSG00000088726.15|mRNA|TMEM40|ENSG00000088726.15|ENSG00000088726.15|0|3562	1.34004	8.33734	46.975	4.70259e-11	3.67672e-10
ENSG00000088727.12|mRNA|KIF9|ENSG00000088727.12|ENSG00000088727.12|0|5850	0.14354	2.43492	0.704681	0.401943	0.446591
ENSG00000088766.11|mRNA|CRLS1|ENSG00000088766.11|ENSG00000088766.11|0|5370	0.659141	5.18462	29.7421	1.09795e-07	4.20237e-07
ENSG00000088808.16|mRNA|PPP1R13B|ENSG00000088808.16|ENSG00000088808.16|0|9031	-1.36122	3.3995	52.1173	5.1001e-12	5.20847e-11
ENSG00000088812.17|mRNA|ATRN|ENSG00000088812.17|ENSG00000088812.17|0|8753	0.250442	3.02879	1.55838	0.212963	0.250896
ENSG00000088826.17|mRNA|SMOX|ENSG00000088826.17|ENSG00000088826.17|0|2946	1.41798	8.02371	47.0388	4.57377e-11	3.58866e-10
ENSG00000088832.16|mRNA|FKBP1A|ENSG00000088832.16|ENSG00000088832.16|0|2577	0.767566	8.71399	40.9369	6.72512e-10	3.99442e-09
ENSG00000088833.17|mRNA|NSFL1C|ENSG00000088833.17|ENSG00000088833.17|0|6531	-0.135663	5.90586	2.73268	0.0994528	0.124919
ENSG00000088854.12|mRNA|C20orf194|ENSG00000088854.12|ENSG00000088854.12|0|8541	0.592134	4.4696	21.9121	4.48277e-06	1.28443e-05
ENSG00000088876.11|mRNA|ZNF343|ENSG00000088876.11|ENSG00000088876.11|0|4643	-0.848927	1.99577	19.9683	1.15081e-05	3.06529e-05
ENSG00000088888.17|mRNA|MAVS|ENSG00000088888.17|ENSG00000088888.17|0|11771	0.860483	5.16049	40.8818	6.89241e-10	4.08162e-09
ENSG00000088930.7|mRNA|XRN2|ENSG00000088930.7|ENSG00000088930.7|0|3437	-0.544043	7.32656	51.1316	7.78386e-12	7.53271e-11
ENSG00000088970.15|mRNA|KIZ|ENSG00000088970.15|ENSG00000088970.15|0|5207	-0.237305	4.68042	6.32698	0.0124607	0.0186233
ENSG00000088986.10|mRNA|DYNLL1|ENSG00000088986.10|ENSG00000088986.10|0|2957	0.858929	9.22008	45.5049	8.93999e-11	6.52011e-10
ENSG00000088992.17|mRNA|TESC|ENSG00000088992.17|ENSG00000088992.17|0|1926	-1.07412	4.88154	53.846	2.43798e-12	2.70743e-11
ENSG00000089006.16|mRNA|SNX5|ENSG00000089006.16|ENSG00000089006.16|0|7953	-0.452582	7.0542	32.3662	3.25835e-08	1.37047e-07
ENSG00000089009.15|mRNA|RPL6|ENSG00000089009.15|ENSG00000089009.15|0|4447	-1.40008	9.42612	134.375	1.42458e-25	2.63086e-23
ENSG00000089022.13|mRNA|MAPKAPK5|ENSG00000089022.13|ENSG00000089022.13|0|14006	-0.555925	5.05205	32.3121	3.34053e-08	1.40238e-07
ENSG00000089041.16|mRNA|P2RX7|ENSG00000089041.16|ENSG00000089041.16|0|5546	-0.177484	1.72573	0.41057	0.522213	0.566093
ENSG00000089048.14|mRNA|ESF1|ENSG00000089048.14|ENSG00000089048.14|0|3216	-1.21023	5.82763	78.0847	1.19e-16	4.46977e-15
ENSG00000089050.15|mRNA|RBBP9|ENSG00000089050.15|ENSG00000089050.15|0|3861	-0.948266	2.08464	21.0554	6.78399e-06	1.88057e-05
ENSG00000089053.12|mRNA|ANAPC5|ENSG00000089053.12|ENSG00000089053.12|0|12304	1.07513	7.97362	50.369	1.08061e-11	1.0029e-10
ENSG00000089057.14|mRNA|SLC23A2|ENSG00000089057.14|ENSG00000089057.14|0|7515	0.730689	3.91093	18.2859	2.62353e-05	6.53767e-05
ENSG00000089060.11|mRNA|SLC8B1|ENSG00000089060.11|ENSG00000089060.11|0|6768	-0.155956	2.27504	0.356817	0.55077	0.593693
ENSG00000089063.14|mRNA|TMEM230|ENSG00000089063.14|ENSG00000089063.14|0|3051	0.044015	6.24413	0.217692	0.641173	0.67968
ENSG00000089094.18|mRNA|KDM2B|ENSG00000089094.18|ENSG00000089094.18|0|13623	-0.619986	4.73146	15.212	0.000120798	0.00026637
ENSG00000089123.15|mRNA|TASP1|ENSG00000089123.15|ENSG00000089123.15|0|2905	0.590585	5.18088	22.4882	3.39601e-06	9.91996e-06
ENSG00000089127.12|mRNA|OAS1|ENSG00000089127.12|ENSG00000089127.12|0|4947	-0.903607	4.48397	27.1269	3.73482e-07	1.29956e-06
ENSG00000089154.10|mRNA|GCN1|ENSG00000089154.10|ENSG00000089154.10|0|9654	-0.463665	5.1831	7.40799	0.00690723	0.0108271
ENSG00000089157.15|mRNA|RPLP0|ENSG00000089157.15|ENSG00000089157.15|0|4001	-1.61582	9.55837	165.436	5.68573e-30	1.9552e-27
ENSG00000089159.16|mRNA|PXN|ENSG00000089159.16|ENSG00000089159.16|0|7460	-1.19599	5.73974	82.5728	2.05031e-17	9.35777e-16
ENSG00000089177.18|mRNA|KIF16B|ENSG00000089177.18|ENSG00000089177.18|0|7721	-0.35339	4.50493	10.4244	0.00139415	0.00251276
ENSG00000089195.14|mRNA|TRMT6|ENSG00000089195.14|ENSG00000089195.14|0|3776	-0.93234	3.9373	35.561	7.555e-09	3.592e-08
ENSG00000089220.4|mRNA|PEBP1|ENSG00000089220.4|ENSG00000089220.4|0|1780	-1.15205	3.91257	65.8923	1.59658e-14	3.37327e-13
ENSG00000089234.15|mRNA|BRAP|ENSG00000089234.15|ENSG00000089234.15|0|4686	0.331505	6.64279	12.0606	0.000597797	0.00115221
ENSG00000089248.6|mRNA|ERP29|ENSG00000089248.6|ENSG00000089248.6|0|3083	-0.711303	4.6281	38.5078	1.99409e-09	1.06514e-08
ENSG00000089280.18|mRNA|FUS|ENSG00000089280.18|ENSG00000089280.18|0|10283	-0.967758	6.39052	52.6451	4.06927e-12	4.25598e-11
ENSG00000089289.15|mRNA|IGBP1|ENSG00000089289.15|ENSG00000089289.15|0|1862	-0.339322	6.88191	23.146	2.47587e-06	7.40126e-06
ENSG00000089327.14|mRNA|FXYD5|ENSG00000089327.14|ENSG00000089327.14|0|2993	0.849563	9.51498	44.1969	1.58784e-10	1.08494e-09
ENSG00000089335.20|mRNA|ZNF302|ENSG00000089335.20|ENSG00000089335.20|0|5032	-0.898878	3.14542	29.5603	1.19493e-07	4.54567e-07
ENSG00000089351.14|mRNA|GRAMD1A|ENSG00000089351.14|ENSG00000089351.14|0|5942	0.112287	5.73485	1.39645	0.238337	0.277812
ENSG00000089356.18|mRNA|FXYD3|ENSG00000089356.18|ENSG00000089356.18|0|3334	1.5965	1.91601	37.289	3.4531e-09	1.76324e-08
ENSG00000089486.16|mRNA|CDIP1|ENSG00000089486.16|ENSG00000089486.16|0|4268	1.19775	6.38952	47.2377	4.19414e-11	3.31427e-10
ENSG00000089505.17|mRNA|CMTM1|ENSG00000089505.17|ENSG00000089505.17|0|1465	1.17677	3.24955	30.657	7.17765e-08	2.84326e-07
ENSG00000089597.16|mRNA|GANAB|ENSG00000089597.16|ENSG00000089597.16|0|5027	0.505191	4.53966	10.5152	0.00132967	0.0024035
ENSG00000089639.10|mRNA|GMIP|ENSG00000089639.10|ENSG00000089639.10|0|3740	-0.149512	6.42721	2.50802	0.114415	0.142164
ENSG00000089682.16|mRNA|RBM41|ENSG00000089682.16|ENSG00000089682.16|0|6101	0.667919	4.74958	36.1327	5.82755e-09	2.84113e-08
ENSG00000089685.14|mRNA|BIRC5|ENSG00000089685.14|ENSG00000089685.14|0|3815	-1.86437	1.98273	68.295	5.99197e-15	1.43106e-13
ENSG00000089693.10|mRNA|MLF2|ENSG00000089693.10|ENSG00000089693.10|0|3781	-0.815069	4.78731	33.5988	1.84984e-08	8.13923e-08
ENSG00000089737.16|mRNA|DDX24|ENSG00000089737.16|ENSG00000089737.16|0|8636	-0.604909	6.42493	38.1171	2.37716e-09	1.2533e-08
ENSG00000089775.11|mRNA|ZBTB25|ENSG00000089775.11|ENSG00000089775.11|0|12229	-0.0340809	2.90658	0.0515013	0.820639	0.846346
ENSG00000089818.17|mRNA|NECAP1|ENSG00000089818.17|ENSG00000089818.17|0|8763	-1.17388	3.37365	55.0244	1.47773e-12	1.75855e-11
ENSG00000089820.15|mRNA|ARHGAP4|ENSG00000089820.15|ENSG00000089820.15|0|5580	-0.527087	6.60846	13.4279	0.000297302	0.000607986
ENSG00000089876.11|mRNA|DHX32|ENSG00000089876.11|ENSG00000089876.11|0|3948	-1.03209	2.86917	40.4015	8.5384e-10	4.92334e-09
ENSG00000089902.9|mRNA|RCOR1|ENSG00000089902.9|ENSG00000089902.9|0|6202	0.308625	5.405	8.95434	0.00301893	0.00507865
ENSG00000089916.17|mRNA|GPATCH2L|ENSG00000089916.17|ENSG00000089916.17|0|21987	0.759267	5.83293	45.4158	9.29628e-11	6.75216e-10
ENSG00000090006.17|mRNA|LTBP4|ENSG00000090006.17|ENSG00000090006.17|0|8108	0.219312	4.02732	2.37001	0.124833	0.153853
ENSG00000090013.9|mRNA|BLVRB|ENSG00000090013.9|ENSG00000090013.9|0|1665	-1.58536	4.87957	86.0143	5.40734e-18	2.84563e-16
ENSG00000090020.10|mRNA|SLC9A1|ENSG00000090020.10|ENSG00000090020.10|0|5974	1.35448	5.65215	54.8322	1.60319e-12	1.87761e-11
ENSG00000090054.13|mRNA|SPTLC1|ENSG00000090054.13|ENSG00000090054.13|0|3658	0.373217	4.00013	8.71263	0.00343211	0.00571446
ENSG00000090060.17|mRNA|PAPOLA|ENSG00000090060.17|ENSG00000090060.17|0|12766	0.138636	8.09086	2.74007	0.0989986	0.124411
ENSG00000090061.17|mRNA|CCNK|ENSG00000090061.17|ENSG00000090061.17|0|8220	-0.390456	6.17493	24.7118	1.17165e-06	3.72229e-06
ENSG00000090097.21|mRNA|PCBP4|ENSG00000090097.21|ENSG00000090097.21|0|3738	-0.788186	3.37411	31.0732	5.91903e-08	2.37392e-07
ENSG00000090238.11|mRNA|YPEL3|ENSG00000090238.11|ENSG00000090238.11|0|3181	-0.16008	7.25648	3.7882	0.0526315	0.0698381
ENSG00000090263.15|mRNA|MRPS33|ENSG00000090263.15|ENSG00000090263.15|0|5262	-1.38999	3.87767	78.4066	1.04817e-16	3.98964e-15
ENSG00000090266.12|mRNA|NDUFB2|ENSG00000090266.12|ENSG00000090266.12|0|4447	-1.1276	5.31814	62.4754	6.51675e-14	1.1574e-12
ENSG00000090273.13|mRNA|NUDC|ENSG00000090273.13|ENSG00000090273.13|0|2856	-0.84972	7.11155	77.6502	1.41264e-16	5.1888e-15
ENSG00000090316.15|mRNA|MAEA|ENSG00000090316.15|ENSG00000090316.15|0|9857	-0.774691	4.37467	36.1744	5.71847e-09	2.79546e-08
ENSG00000090339.8|mRNA|ICAM1|ENSG00000090339.8|ENSG00000090339.8|0|3706	-0.686693	2.35152	5.76144	0.0170452	0.0248115
ENSG00000090372.14|mRNA|STRN4|ENSG00000090372.14|ENSG00000090372.14|0|7641	0.912958	7.29656	51.7775	5.89941e-12	5.90682e-11
ENSG00000090376.10|mRNA|IRAK3|ENSG00000090376.10|ENSG00000090376.10|0|10004	0.682678	7.8124	33.3645	2.05954e-08	8.97477e-08
ENSG00000090382.6|mRNA|LYZ|ENSG00000090382.6|ENSG00000090382.6|0|1764	-0.970673	7.05012	40.6859	7.52105e-10	4.40939e-09
ENSG00000090447.11|mRNA|TFAP4|ENSG00000090447.11|ENSG00000090447.11|0|7867	-1.41773	3.0477	73.8721	6.335e-16	1.87744e-14
ENSG00000090470.14|mRNA|PDCD7|ENSG00000090470.14|ENSG00000090470.14|0|3263	-0.567175	3.45591	13.8957	0.000234502	0.000489548
ENSG00000090487.10|mRNA|SPG21|ENSG00000090487.10|ENSG00000090487.10|0|3984	-0.797731	5.02218	63.5844	4.12149e-14	7.77702e-13
ENSG00000090520.11|mRNA|DNAJB11|ENSG00000090520.11|ENSG00000090520.11|0|5731	-0.56038	4.51142	10.6655	0.00122959	0.00223618
ENSG00000090530.9|mRNA|P3H2|ENSG00000090530.9|ENSG00000090530.9|0|5605	0.818327	2.48492	7.22445	0.00762939	0.0118585
ENSG00000090554.12|mRNA|FLT3LG|ENSG00000090554.12|ENSG00000090554.12|0|2846	-1.56499	3.72465	82.9097	1.79846e-17	8.2916e-16
ENSG00000090565.15|mRNA|RAB11FIP3|ENSG00000090565.15|ENSG00000090565.15|0|6317	0.703987	5.71366	36.9779	3.97427e-09	2.00219e-08
ENSG00000090581.9|mRNA|GNPTG|ENSG00000090581.9|ENSG00000090581.9|0|4102	0.342668	4.13315	5.51073	0.0196078	0.0282224
ENSG00000090612.20|mRNA|ZNF268|ENSG00000090612.20|ENSG00000090612.20|0|14095	-0.564162	2.67585	14.6705	0.000158576	0.000342517
ENSG00000090615.14|mRNA|GOLGA3|ENSG00000090615.14|ENSG00000090615.14|0|10549	-0.400728	5.65491	8.31292	0.00424675	0.00693137
ENSG00000090621.13|mRNA|PABPC4|ENSG00000090621.13|ENSG00000090621.13|0|6782	-1.23098	6.34984	94.2828	2.31973e-19	1.6065e-17
ENSG00000090661.11|mRNA|CERS4|ENSG00000090661.11|ENSG00000090661.11|0|4059	-0.549576	2.17487	8.07938	0.00481193	0.00776614
ENSG00000090674.15|mRNA|MCOLN1|ENSG00000090674.15|ENSG00000090674.15|0|3956	-1.03367	3.09374	28.7673	1.73011e-07	6.37837e-07
ENSG00000090686.15|mRNA|USP48|ENSG00000090686.15|ENSG00000090686.15|0|9497	0.750919	8.27581	53.6971	2.59755e-12	2.85759e-11
ENSG00000090776.5|mRNA|EFNB1|ENSG00000090776.5|ENSG00000090776.5|0|3314	1.00752	3.46223	26.4	5.26183e-07	1.78028e-06
ENSG00000090857.13|mRNA|PDPR|ENSG00000090857.13|ENSG00000090857.13|0|10385	0.195449	3.0178	0.991089	0.32035	0.363074
ENSG00000090861.15|mRNA|AARS|ENSG00000090861.15|ENSG00000090861.15|0|4498	-0.263337	5.19165	7.94976	0.00515835	0.00828367
ENSG00000090863.11|mRNA|GLG1|ENSG00000090863.11|ENSG00000090863.11|0|14111	0.646077	6.18945	27.9998	2.47815e-07	8.88808e-07
ENSG00000090889.11|mRNA|KIF4A|ENSG00000090889.11|ENSG00000090889.11|0|4533	0.190333	3.72048	2.10957	0.147518	0.179296
ENSG00000090905.18|mRNA|TNRC6A|ENSG00000090905.18|ENSG00000090905.18|0|12924	0.418833	6.10073	30.3062	8.44656e-08	3.30392e-07
ENSG00000090924.14|mRNA|PLEKHG2|ENSG00000090924.14|ENSG00000090924.14|0|9200	-0.097865	2.51905	0.222138	0.637788	0.67664
ENSG00000090975.12|mRNA|PITPNM2|ENSG00000090975.12|ENSG00000090975.12|0|9161	1.40249	7.77525	45.7716	7.95485e-11	5.88063e-10
ENSG00000090989.17|mRNA|EXOC1|ENSG00000090989.17|ENSG00000090989.17|0|5347	-0.632939	5.03922	29.1328	1.45854e-07	5.44565e-07
ENSG00000091009.7|mRNA|RBM27|ENSG00000091009.7|ENSG00000091009.7|0|6578	-0.361353	6.35244	23.0026	2.6523e-06	7.892e-06
ENSG00000091039.16|mRNA|OSBPL8|ENSG00000091039.16|ENSG00000091039.16|0|9198	0.304383	8.10574	9.96442	0.00177306	0.00312234
ENSG00000091073.19|mRNA|DTX2|ENSG00000091073.19|ENSG00000091073.19|0|5042	-0.41394	3.8774	4.9684	0.0266211	0.0372732
ENSG00000091106.18|mRNA|NLRC4|ENSG00000091106.18|ENSG00000091106.18|0|3624	-1.03458	3.22955	38.0264	2.47628e-09	1.30075e-08
ENSG00000091127.13|mRNA|PUS7|ENSG00000091127.13|ENSG00000091127.13|0|4421	0.790036	6.03127	27.1447	3.70365e-07	1.28984e-06
ENSG00000091136.13|mRNA|LAMB1|ENSG00000091136.13|ENSG00000091136.13|0|8140	-1.26538	2.35816	35.287	8.55762e-09	4.03312e-08
ENSG00000091140.13|mRNA|DLD|ENSG00000091140.13|ENSG00000091140.13|0|5299	-0.753515	5.04948	49.0206	1.93421e-11	1.66787e-10
ENSG00000091157.13|mRNA|WDR7|ENSG00000091157.13|ENSG00000091157.13|0|15694	0.497342	6.18492	24.3488	1.39288e-06	4.36535e-06
ENSG00000091164.12|mRNA|TXNL1|ENSG00000091164.12|ENSG00000091164.12|0|11298	0.12182	6.58014	1.63743	0.201754	0.239182
ENSG00000091317.7|mRNA|CMTM6|ENSG00000091317.7|ENSG00000091317.7|0|4413	1.18536	6.63233	36.6976	4.51152e-09	2.24993e-08
ENSG00000091409.14|mRNA|ITGA6|ENSG00000091409.14|ENSG00000091409.14|0|6533	0.932681	6.50599	43.1642	2.50372e-10	1.63298e-09
ENSG00000091428.17|mRNA|RAPGEF4|ENSG00000091428.17|ENSG00000091428.17|0|7129	-1.2119	2.25434	33.745	1.73001e-08	7.66186e-08
ENSG00000091436.16|mRNA|MAP3K20|ENSG00000091436.16|ENSG00000091436.16|0|13799	-0.911846	3.43636	40.6251	7.72773e-10	4.50803e-09
ENSG00000091483.6|mRNA|FH|ENSG00000091483.6|ENSG00000091483.6|0|2142	-1.19912	3.65655	63.5283	4.21793e-14	7.94398e-13
ENSG00000091490.10|mRNA|SEL1L3|ENSG00000091490.10|ENSG00000091490.10|0|7489	0.897979	5.9239	24.5977	1.23708e-06	3.9152e-06
ENSG00000091513.14|mRNA|TF|ENSG00000091513.14|ENSG00000091513.14|0|8565	3.00477	3.4482	29.3923	1.29227e-07	4.88426e-07
ENSG00000091527.15|mRNA|CDV3|ENSG00000091527.15|ENSG00000091527.15|0|4367	-0.48718	7.66487	23.0027	2.65214e-06	7.892e-06
ENSG00000091542.8|mRNA|ALKBH5|ENSG00000091542.8|ENSG00000091542.8|0|3190	-0.129248	4.7207	1.33942	0.248139	0.287958
ENSG00000091583.10|mRNA|APOH|ENSG00000091583.10|ENSG00000091583.10|0|1332	1.88036	4.20605	14.7281	0.000154045	0.000333814
ENSG00000091592.15|mRNA|NLRP1|ENSG00000091592.15|ENSG00000091592.15|0|12808	-0.395181	4.61706	4.64358	0.0320364	0.0442435
ENSG00000091622.15|mRNA|PITPNM3|ENSG00000091622.15|ENSG00000091622.15|0|10609	-1.5192	3.37323	38.0232	2.47979e-09	1.30122e-08
ENSG00000091640.7|mRNA|SPAG7|ENSG00000091640.7|ENSG00000091640.7|0|2831	-1.01234	5.17929	69.8351	3.20943e-15	8.18569e-14
ENSG00000091732.15|mRNA|ZC3HC1|ENSG00000091732.15|ENSG00000091732.15|0|3011	0.258993	3.99759	4.74367	0.0302542	0.0419742
ENSG00000091972.18|mRNA|CD200|ENSG00000091972.18|ENSG00000091972.18|0|2991	-1.60359	2.19669	56.1672	9.11031e-13	1.14352e-11
ENSG00000092010.14|mRNA|PSME1|ENSG00000092010.14|ENSG00000092010.14|0|1781	-0.900388	8.13071	89.0616	1.67966e-18	9.91151e-17
ENSG00000092020.10|mRNA|PPP2R3C|ENSG00000092020.10|ENSG00000092020.10|0|3863	-0.0626017	6.4534	0.641932	0.423702	0.468549
ENSG00000092036.18|mRNA|HAUS4|ENSG00000092036.18|ENSG00000092036.18|0|2539	-1.07706	3.90528	62.8972	5.47366e-14	9.93377e-13
ENSG00000092094.10|mRNA|OSGEP|ENSG00000092094.10|ENSG00000092094.10|0|5037	-0.740808	3.59109	30.3427	8.30483e-08	3.25294e-07
ENSG00000092096.16|mRNA|SLC22A17|ENSG00000092096.16|ENSG00000092096.16|0|4278	1.05226	1.97795	17.0383	4.85877e-05	0.000115381
ENSG00000092098.16|mRNA|RNF31|ENSG00000092098.16|ENSG00000092098.16|0|4982	-0.811214	3.97346	23.1676	2.45038e-06	7.33165e-06
ENSG00000092108.20|mRNA|SCFD1|ENSG00000092108.20|ENSG00000092108.20|0|6571	0.522658	7.54685	27.123	3.74161e-07	1.3017e-06
ENSG00000092140.14|mRNA|G2E3|ENSG00000092140.14|ENSG00000092140.14|0|9237	-0.17585	4.42125	3.16132	0.0765051	0.0983622
ENSG00000092148.12|mRNA|HECTD1|ENSG00000092148.12|ENSG00000092148.12|0|12557	-0.0752784	6.98324	0.880786	0.45132	0.496146
ENSG00000092199.17|mRNA|HNRNPC|ENSG00000092199.17|ENSG00000092199.17|0|7309	-0.230317	8.64385	8.4741	0.00389675	0.00640943
ENSG00000092201.9|mRNA|SUPT16H|ENSG00000092201.9|ENSG00000092201.9|0|7151	-0.830467	6.84237	59.1741	2.57387e-13	3.85404e-12
ENSG00000092203.13|mRNA|TOX4|ENSG00000092203.13|ENSG00000092203.13|0|7091	-0.279826	5.38822	10.4008	0.00141135	0.0025401
ENSG00000092208.16|mRNA|GEMIN2|ENSG00000092208.16|ENSG00000092208.16|0|2532	-0.745375	2.5305	19.7444	1.28365e-05	3.38655e-05
ENSG00000092330.15|mRNA|TINF2|ENSG00000092330.15|ENSG00000092330.15|0|2712	-0.93051	4.13219	57.4506	5.30345e-13	7.16164e-12
ENSG00000092439.13|mRNA|TRPM7|ENSG00000092439.13|ENSG00000092439.13|0|12333	0.56665	6.8724	26.1298	5.97863e-07	2.00578e-06
ENSG00000092470.11|mRNA|WDR76|ENSG00000092470.11|ENSG00000092470.11|0|4078	-0.662638	3.65121	27.3059	3.43314e-07	1.20235e-06
ENSG00000092529.23|mRNA|CAPN3|ENSG00000092529.23|ENSG00000092529.23|0|4995	-0.166938	2.54939	0.342023	0.559142	0.601483
ENSG00000092531.9|mRNA|SNAP23|ENSG00000092531.9|ENSG00000092531.9|0|5900	1.3233	10.0607	65.1322	2.18025e-14	4.38357e-13
ENSG00000092621.12|mRNA|PHGDH|ENSG00000092621.12|ENSG00000092621.12|0|9217	1.00522	3.42009	23.3048	2.29444e-06	6.90445e-06
ENSG00000092820.17|mRNA|EZR|ENSG00000092820.17|ENSG00000092820.17|0|3342	-1.02384	7.75954	66.1579	1.43212e-14	3.05821e-13
ENSG00000092841.18|mRNA|MYL6|ENSG00000092841.18|ENSG00000092841.18|0|4609	0.685678	10.4569	35.768	6.87662e-09	3.29856e-08
ENSG00000092847.11|mRNA|AGO1|ENSG00000092847.11|ENSG00000092847.11|0|13886	0.593778	6.54998	23.5557	2.03457e-06	6.17743e-06
ENSG00000092853.13|mRNA|CLSPN|ENSG00000092853.13|ENSG00000092853.13|0|5411	-0.260892	4.33313	5.37868	0.0211157	0.0301901
ENSG00000092871.16|mRNA|RFFL|ENSG00000092871.16|ENSG00000092871.16|0|8512	-0.785968	3.58643	37.7843	2.7616e-09	1.437e-08
ENSG00000092929.11|mRNA|UNC13D|ENSG00000092929.11|ENSG00000092929.11|0|7752	0.83034	7.31958	34.1095	1.4643e-08	6.58372e-08
ENSG00000092931.11|mRNA|MFSD11|ENSG00000092931.11|ENSG00000092931.11|0|6587	0.854779	5.12778	30.4585	7.87004e-08	3.09236e-07
ENSG00000092964.17|mRNA|DPYSL2|ENSG00000092964.17|ENSG00000092964.17|0|7305	-0.620428	6.24304	31.8794	4.07798e-08	1.68466e-07
ENSG00000092969.11|mRNA|TGFB2|ENSG00000092969.11|ENSG00000092969.11|0|5151	1.48704	5.48438	46.4868	5.81877e-11	4.45853e-10
ENSG00000092978.10|mRNA|GPATCH2|ENSG00000092978.10|ENSG00000092978.10|0|8833	-0.297806	3.20969	4.00499	0.0463464	0.0622016
ENSG00000093000.18|mRNA|NUP50|ENSG00000093000.18|ENSG00000093000.18|0|8318	-0.283831	5.99064	10.0444	0.00170028	0.00300719
ENSG00000093010.13|mRNA|COMT|ENSG00000093010.13|ENSG00000093010.13|0|5195	0.991477	4.89175	45.2226	1.0118e-10	7.27483e-10
ENSG00000093072.15|mRNA|ADA2|ENSG00000093072.15|ENSG00000093072.15|0|5800	0.379068	4.07755	2.03585	0.15476	0.187345
ENSG00000093144.18|mRNA|ECHDC1|ENSG00000093144.18|ENSG00000093144.18|0|5678	-0.895616	4.84971	50.0475	1.24124e-11	1.13147e-10
ENSG00000093167.17|mRNA|LRRFIP2|ENSG00000093167.17|ENSG00000093167.17|0|10644	0.954207	8.92565	58.6683	3.18085e-13	4.62068e-12
ENSG00000093183.13|mRNA|SEC22C|ENSG00000093183.13|ENSG00000093183.13|0|8159	-0.541327	2.62098	8.45501	0.0039366	0.0064675
ENSG00000094631.18|mRNA|HDAC6|ENSG00000094631.18|ENSG00000094631.18|0|10412	0.436364	5.11008	15.9535	8.33479e-05	0.000189143
ENSG00000094804.9|mRNA|CDC6|ENSG00000094804.9|ENSG00000094804.9|0|5120	-0.352855	1.93784	2.97044	0.0859207	0.10934
ENSG00000094841.13|mRNA|UPRT|ENSG00000094841.13|ENSG00000094841.13|0|2825	0.278624	3.82843	4.35113	0.0379043	0.0516358
ENSG00000094880.10|mRNA|CDC23|ENSG00000094880.10|ENSG00000094880.10|0|4618	-0.476775	3.74018	17.2411	4.39419e-05	0.000105162
ENSG00000094914.12|mRNA|AAAS|ENSG00000094914.12|ENSG00000094914.12|0|4138	-0.95251	3.29797	33.4597	1.97161e-08	8.6293e-08
ENSG00000094916.15|mRNA|CBX5|ENSG00000094916.15|ENSG00000094916.15|0|15040	-0.248287	5.19885	6.28362	0.0127621	0.019031
ENSG00000094963.13|mRNA|FMO2|ENSG00000094963.13|ENSG00000094963.13|0|4786	0.0387844	3.95431	0.0392501	0.8431	0.866696
ENSG00000094975.13|mRNA|SUCO|ENSG00000094975.13|ENSG00000094975.13|0|7894	0.526477	7.28981	25.1731	9.40895e-07	3.04152e-06
ENSG00000095002.13|mRNA|MSH2|ENSG00000095002.13|ENSG00000095002.13|0|4552	-0.592713	4.06572	22.8659	2.83219e-06	8.38225e-06
ENSG00000095015.5|mRNA|MAP3K1|ENSG00000095015.5|ENSG00000095015.5|0|7716	-0.606098	6.64135	37.4108	3.26842e-09	1.67882e-08
ENSG00000095059.15|mRNA|DHPS|ENSG00000095059.15|ENSG00000095059.15|0|3006	-0.492585	4.66535	29.9474	9.97951e-08	3.85217e-07
ENSG00000095066.11|mRNA|HOOK2|ENSG00000095066.11|ENSG00000095066.11|0|5950	0.217884	2.06094	0.664926	0.415531	0.460451
ENSG00000095139.13|mRNA|ARCN1|ENSG00000095139.13|ENSG00000095139.13|0|4177	-0.244705	7.28483	14.3061	0.000190567	0.000404324
ENSG00000095209.11|mRNA|TMEM38B|ENSG00000095209.11|ENSG00000095209.11|0|4511	0.307897	2.83843	4.12498	0.0432143	0.0582805
ENSG00000095261.13|mRNA|PSMD5|ENSG00000095261.13|ENSG00000095261.13|0|4432	-0.554256	3.35037	16.2009	7.36738e-05	0.00016887
ENSG00000095303.14|mRNA|PTGS1|ENSG00000095303.14|ENSG00000095303.14|0|5790	1.42467	10.9794	53.8813	2.40159e-12	2.67329e-11
ENSG00000095319.14|mRNA|NUP188|ENSG00000095319.14|ENSG00000095319.14|0|8041	-0.542631	4.59282	16.2622	7.14573e-05	0.000164404
ENSG00000095321.16|mRNA|CRAT|ENSG00000095321.16|ENSG00000095321.16|0|3803	1.25795	6.90623	49.6488	1.47422e-11	1.31148e-10
ENSG00000095370.19|mRNA|SH2D3C|ENSG00000095370.19|ENSG00000095370.19|0|4659	-1.10808	4.98003	50.8357	8.83948e-12	8.4275e-11
ENSG00000095380.10|mRNA|NANS|ENSG00000095380.10|ENSG00000095380.10|0|4922	-0.968122	4.32639	49.0468	1.91239e-11	1.65048e-10
ENSG00000095383.19|mRNA|TBC1D2|ENSG00000095383.19|ENSG00000095383.19|0|3681	-0.723073	2.53462	13.8254	0.00024301	0.00050591
ENSG00000095485.17|mRNA|CWF19L1|ENSG00000095485.17|ENSG00000095485.17|0|3985	-1.08152	3.43351	66.8551	1.07708e-14	2.38692e-13
ENSG00000095564.13|mRNA|BTAF1|ENSG00000095564.13|ENSG00000095564.13|0|7582	0.565039	6.47427	16.4042	6.6579e-05	0.000153944
ENSG00000095574.11|mRNA|IKZF5|ENSG00000095574.11|ENSG00000095574.11|0|4934	-0.247868	3.40132	3.54023	0.0609514	0.0798473
ENSG00000095585.16|mRNA|BLNK|ENSG00000095585.16|ENSG00000095585.16|0|3655	-0.601337	5.1597	7.44192	0.00678161	0.0106478
ENSG00000095637.21|mRNA|SORBS1|ENSG00000095637.21|ENSG00000095637.21|0|10819	-0.749238	4.84264	36.3967	5.17029e-09	2.54959e-08
ENSG00000095787.21|mRNA|WAC|ENSG00000095787.21|ENSG00000095787.21|0|12188	0.0712431	8.20217	0.720278	0.396789	0.44148
ENSG00000095794.19|mRNA|CREM|ENSG00000095794.19|ENSG00000095794.19|0|5699	0.809837	5.97187	37.1514	3.67461e-09	1.86489e-08
ENSG00000095906.16|mRNA|NUBP2|ENSG00000095906.16|ENSG00000095906.16|0|4983	-1.24012	2.9459	36.2346	5.56434e-09	2.72479e-08
ENSG00000095932.6|mRNA|SMIM24|ENSG00000095932.6|ENSG00000095932.6|0|1498	-0.452058	2.38984	3.99858	0.0465202	0.0623971
ENSG00000095951.16|mRNA|HIVEP1|ENSG00000095951.16|ENSG00000095951.16|0|10979	0.327827	3.42972	3.08716	0.080023	0.102436
ENSG00000096060.14|mRNA|FKBP5|ENSG00000096060.14|ENSG00000096060.14|0|10628	-0.485936	6.66331	11.8439	0.000668266	0.00127534
ENSG00000096063.15|mRNA|SRPK1|ENSG00000096063.15|ENSG00000096063.15|0|6692	-0.456556	5.44865	19.9227	1.17668e-05	3.12627e-05
ENSG00000096070.19|mRNA|BRPF3|ENSG00000096070.19|ENSG00000096070.19|0|6613	-0.72332	3.1932	21.9212	4.46304e-06	1.28006e-05
ENSG00000096080.11|mRNA|MRPS18A|ENSG00000096080.11|ENSG00000096080.11|0|1284	-0.855426	4.25474	36.2659	5.486e-09	2.68973e-08
ENSG00000096092.5|mRNA|TMEM14A|ENSG00000096092.5|ENSG00000096092.5|0|992	-0.471918	2.48623	6.55483	0.0109936	0.0166036
ENSG00000096093.15|mRNA|EFHC1|ENSG00000096093.15|ENSG00000096093.15|0|22736	1.02395	2.86564	28.838	1.67382e-07	6.17998e-07
ENSG00000096384.19|mRNA|HSP90AB1|ENSG00000096384.19|ENSG00000096384.19|0|2980	-1.18273	8.89686	100.739	2.0872e-20	1.76395e-18
ENSG00000096401.7|mRNA|CDC5L|ENSG00000096401.7|ENSG00000096401.7|0|6423	0.0441982	6.93556	0.296183	0.586726	0.628072
ENSG00000096433.10|mRNA|ITPR3|ENSG00000096433.10|ENSG00000096433.10|0|9870	-0.517677	4.25318	9.56745	0.00218399	0.00377467
ENSG00000096654.15|mRNA|ZNF184|ENSG00000096654.15|ENSG00000096654.15|0|3122	-0.837526	1.95591	16.8942	5.21876e-05	0.000123181
ENSG00000096696.13|mRNA|DSP|ENSG00000096696.13|ENSG00000096696.13|0|10093	-1.13869	2.99083	30.6645	7.15272e-08	2.83508e-07
ENSG00000096717.11|mRNA|SIRT1|ENSG00000096717.11|ENSG00000096717.11|0|4551	-0.701993	4.19117	33.4542	1.97661e-08	8.6417e-08
ENSG00000096746.17|mRNA|HNRNPH3|ENSG00000096746.17|ENSG00000096746.17|0|5373	0.124766	8.46153	1.82247	0.178127	0.21334
ENSG00000096872.15|mRNA|IFT74|ENSG00000096872.15|ENSG00000096872.15|0|3755	0.870969	6.67513	46.5855	5.5735e-11	4.297e-10
ENSG00000096968.13|mRNA|JAK2|ENSG00000096968.13|ENSG00000096968.13|0|6170	0.984997	8.23139	57.9722	4.25947e-13	5.9161e-12
ENSG00000096996.15|mRNA|IL12RB1|ENSG00000096996.15|ENSG00000096996.15|0|4298	-0.94055	2.48216	17.6848	3.52842e-05	8.59165e-05
ENSG00000097007.17|mRNA|ABL1|ENSG00000097007.17|ENSG00000097007.17|0|6276	-0.449552	2.94107	4.47635	0.0352642	0.0483465
ENSG00000097021.19|mRNA|ACOT7|ENSG00000097021.19|ENSG00000097021.19|0|4124	1.27477	5.96661	54.1518	2.14051e-12	2.41473e-11
ENSG00000097033.14|mRNA|SH3GLB1|ENSG00000097033.14|ENSG00000097033.14|0|6881	0.41427	7.62439	19.6696	1.33136e-05	3.50546e-05
ENSG00000097046.12|mRNA|CDC7|ENSG00000097046.12|ENSG00000097046.12|0|3557	-0.548339	2.49141	11.2773	0.000895194	0.0016657
ENSG00000099139.13|mRNA|PCSK5|ENSG00000099139.13|ENSG00000099139.13|0|12705	-1.6546	2.25411	59.2649	2.47794e-13	3.74413e-12
ENSG00000099194.5|mRNA|SCD|ENSG00000099194.5|ENSG00000099194.5|0|5362	-0.534005	1.8973	4.19365	0.0415235	0.0561749
ENSG00000099204.18|mRNA|ABLIM1|ENSG00000099204.18|ENSG00000099204.18|0|9871	0.40912	7.21301	10.8475	0.00111859	0.00204775
ENSG00000099219.13|mRNA|ERMP1|ENSG00000099219.13|ENSG00000099219.13|0|6528	0.384845	3.314	6.74683	0.00989613	0.0150809
ENSG00000099246.16|mRNA|RAB18|ENSG00000099246.16|ENSG00000099246.16|0|6223	-0.196672	5.59657	5.07375	0.0250779	0.0352984
ENSG00000099250.17|mRNA|NRP1|ENSG00000099250.17|ENSG00000099250.17|0|11522	0.362142	4.4294	1.67583	0.196563	0.233457
ENSG00000099256.18|mRNA|PRTFDC1|ENSG00000099256.18|ENSG00000099256.18|0|2329	1.46137	5.6655	50.623	9.68666e-12	9.12184e-11
ENSG00000099260.10|mRNA|PALMD|ENSG00000099260.10|ENSG00000099260.10|0|8244	-1.16643	5.55787	51.5643	6.46412e-12	6.40154e-11
ENSG00000099282.9|mRNA|TSPAN15|ENSG00000099282.9|ENSG00000099282.9|0|2646	0.897761	4.34271	29.5494	1.20106e-07	4.56636e-07
ENSG00000099290.15|mRNA|WASHC2A|ENSG00000099290.15|ENSG00000099290.15|0|5159	-0.345645	6.24909	15.4633	0.0001065	0.000237325
ENSG00000099308.10|mRNA|MAST3|ENSG00000099308.10|ENSG00000099308.10|0|6772	-0.591263	5.82993	16.6994	5.74879e-05	0.000134609
ENSG00000099330.8|mRNA|OCEL1|ENSG00000099330.8|ENSG00000099330.8|0|1867	-0.844372	2.6089	23.3237	2.27367e-06	6.85022e-06
ENSG00000099331.13|mRNA|MYO9B|ENSG00000099331.13|ENSG00000099331.13|0|9948	-0.011208	7.53877	0.0118901	0.913249	0.928968
ENSG00000099337.4|mRNA|KCNK6|ENSG00000099337.4|ENSG00000099337.4|0|6169	1.30609	3.52425	54.3802	1.94243e-12	2.22654e-11
ENSG00000099341.11|mRNA|PSMD8|ENSG00000099341.11|ENSG00000099341.11|0|3105	-1.19605	5.75571	102.391	1.13493e-20	1.00605e-18
ENSG00000099364.16|mRNA|FBXL19|ENSG00000099364.16|ENSG00000099364.16|0|4340	0.112991	3.04529	0.363808	0.546895	0.590072
ENSG00000099365.10|mRNA|STX1B|ENSG00000099365.10|ENSG00000099365.10|0|5229	1.1794	2.32665	27.4965	3.13882e-07	1.10685e-06
ENSG00000099381.17|mRNA|SETD1A|ENSG00000099381.17|ENSG00000099381.17|0|6832	-0.597589	4.53983	12.479	0.000482368	0.000947305
ENSG00000099385.11|mRNA|BCL7C|ENSG00000099385.11|ENSG00000099385.11|0|4398	-1.40264	4.24991	77.6986	1.38588e-16	5.10931e-15
ENSG00000099622.13|mRNA|CIRBP|ENSG00000099622.13|ENSG00000099622.13|0|6368	-0.289859	6.53149	13.0993	0.000351404	0.000709244
ENSG00000099624.7|mRNA|ATP5D|ENSG00000099624.7|ENSG00000099624.7|0|2250	-1.07552	6.37951	80.428	4.73742e-17	1.96441e-15
ENSG00000099725.14|pseudogene|PRKY|ENSG00000099725.14|ENSG00000099725.14|0|7674	-0.0705357	2.49226	0.0634935	0.801245	0.828881
ENSG00000099783.11|mRNA|HNRNPM|ENSG00000099783.11|ENSG00000099783.11|0|5614	-0.1968	9.22091	7.27336	0.00742967	0.0115774
ENSG00000099785.10|mRNA|MARCH2|ENSG00000099785.10|ENSG00000099785.10|0|2216	1.29427	8.12563	49.9279	1.30694e-11	1.18271e-10
ENSG00000099795.6|mRNA|NDUFB7|ENSG00000099795.6|ENSG00000099795.6|0|531	-1.04387	4.93776	67.2816	9.05114e-15	2.05609e-13
ENSG00000099797.13|mRNA|TECR|ENSG00000099797.13|ENSG00000099797.13|0|5749	-0.0402571	4.40035	0.114279	0.89319	0.91147
ENSG00000099800.7|mRNA|TIMM13|ENSG00000099800.7|ENSG00000099800.7|0|1973	-1.26347	3.42061	49.0367	1.92082e-11	1.65704e-10
ENSG00000099804.8|mRNA|CDC34|ENSG00000099804.8|ENSG00000099804.8|0|1942	-0.901344	4.78006	45.9384	7.3948e-11	5.50128e-10
ENSG00000099810.18|mRNA|MTAP|ENSG00000099810.18|ENSG00000099810.18|0|14617	-0.216265	3.17275	2.33201	0.127886	0.157362
ENSG00000099817.11|mRNA|POLR2E|ENSG00000099817.11|ENSG00000099817.11|0|4865	0.530123	6.72215	20.685	8.11995e-06	2.22035e-05
ENSG00000099821.13|mRNA|POLRMT|ENSG00000099821.13|ENSG00000099821.13|0|5124	-0.402389	3.61487	3.93455	0.048296	0.064536
ENSG00000099860.8|mRNA|GADD45B|ENSG00000099860.8|ENSG00000099860.8|0|2138	-1.28864	2.94697	33.3377	2.08506e-08	9.07606e-08
ENSG00000099864.17|mRNA|PALM|ENSG00000099864.17|ENSG00000099864.17|0|4908	-0.633603	2.17929	6.31905	0.0125152	0.0186964
ENSG00000099875.14|mRNA|MKNK2|ENSG00000099875.14|ENSG00000099875.14|0|5221	-1.24474	5.95322	77.6651	1.40436e-16	5.16788e-15
ENSG00000099899.14|mRNA|TRMT2A|ENSG00000099899.14|ENSG00000099899.14|0|3963	-0.913458	3.09877	19.3713	1.54032e-05	4.01222e-05
ENSG00000099901.16|mRNA|RANBP1|ENSG00000099901.16|ENSG00000099901.16|0|4622	-1.05991	6.16923	57.0221	6.35198e-13	8.30756e-12
ENSG00000099904.15|mRNA|ZDHHC8|ENSG00000099904.15|ENSG00000099904.15|0|5542	0.175576	1.8241	0.387835	0.533955	0.577722
ENSG00000099910.16|mRNA|KLHL22|ENSG00000099910.16|ENSG00000099910.16|0|4646	-0.722432	1.83286	9.92086	0.00181401	0.00318574
ENSG00000099917.17|mRNA|MED15|ENSG00000099917.17|ENSG00000099917.17|0|10374	-0.560692	5.92096	31.6407	4.55301e-08	1.86544e-07
ENSG00000099940.11|mRNA|SNAP29|ENSG00000099940.11|ENSG00000099940.11|0|4953	0.643052	7.26522	41.994	4.20353e-10	2.61426e-09
ENSG00000099942.12|mRNA|CRKL|ENSG00000099942.12|ENSG00000099942.12|0|5325	0.699967	5.71008	23.6172	1.97561e-06	6.01398e-06
ENSG00000099949.18|mRNA|LZTR1|ENSG00000099949.18|ENSG00000099949.18|0|7556	-0.113785	3.49389	0.423842	0.515568	0.559437
ENSG00000099954.18|mRNA|CECR2|ENSG00000099954.18|ENSG00000099954.18|0|10759	1.23251	3.3012	36.9658	3.99613e-09	2.0127e-08
ENSG00000099956.18|mRNA|SMARCB1|ENSG00000099956.18|ENSG00000099956.18|0|2481	-0.810854	6.01233	73.8974	6.27136e-16	1.86134e-14
ENSG00000099958.14|mRNA|DERL3|ENSG00000099958.14|ENSG00000099958.14|0|3796	1.22955	2.15908	10.3861	0.00142224	0.00255809
ENSG00000099968.17|mRNA|BCL2L13|ENSG00000099968.17|ENSG00000099968.17|0|7662	-0.326264	4.80373	10.706	0.00120393	0.00219232
ENSG00000099974.7|mRNA|DDTL|ENSG00000099974.7|ENSG00000099974.7|0|1545	-1.2363	1.98205	49.0169	1.93731e-11	1.66982e-10
ENSG00000099977.13|mRNA|DDT|ENSG00000099977.13|ENSG00000099977.13|0|1753	-1.00098	3.41067	50.3286	1.0996e-11	1.01582e-10
ENSG00000099991.17|mRNA|CABIN1|ENSG00000099991.17|ENSG00000099991.17|0|9388	-0.13872	5.29075	1.38128	0.240898	0.280453
ENSG00000099992.15|mRNA|TBC1D10A|ENSG00000099992.15|ENSG00000099992.15|0|7047	-1.15661	3.58823	38.8259	1.72853e-09	9.35309e-09
ENSG00000099995.18|mRNA|SF3A1|ENSG00000099995.18|ENSG00000099995.18|0|6329	-0.101561	8.04755	1.46855	0.226613	0.265495
ENSG00000099999.14|mRNA|RNF215|ENSG00000099999.14|ENSG00000099999.14|0|10624	0.815634	2.39059	16.3475	6.84837e-05	0.000158018
ENSG00000100003.17|mRNA|SEC14L2|ENSG00000100003.17|ENSG00000100003.17|0|5985	0.81692	2.11079	12.0403	0.000604087	0.00116265
ENSG00000100014.19|mRNA|SPECC1L|ENSG00000100014.19|ENSG00000100014.19|0|7324	0.171826	5.62661	4.01907	0.0459667	0.0617378
ENSG00000100023.18|mRNA|PPIL2|ENSG00000100023.18|ENSG00000100023.18|0|7669	-0.694364	4.07566	20.2525	1.00202e-05	2.69308e-05
ENSG00000100028.11|mRNA|SNRPD3|ENSG00000100028.11|ENSG00000100028.11|0|2544	-0.543132	5.79395	41.1028	6.24632e-10	3.73003e-09
ENSG00000100029.17|mRNA|PES1|ENSG00000100029.17|ENSG00000100029.17|0|4557	-0.989268	5.08226	43.8891	1.81839e-10	1.22485e-09
ENSG00000100030.14|mRNA|MAPK1|ENSG00000100030.14|ENSG00000100030.14|0|11336	0.411148	7.3006	17.8316	3.28176e-05	8.03224e-05
ENSG00000100031.18|mRNA|GGT1|ENSG00000100031.18|ENSG00000100031.18|0|4434	0.402248	2.48338	3.63072	0.0577632	0.0760345
ENSG00000100034.13|mRNA|PPM1F|ENSG00000100034.13|ENSG00000100034.13|0|10083	-0.612946	4.26228	15.1595	0.000124021	0.000272873
ENSG00000100038.19|mRNA|TOP3B|ENSG00000100038.19|ENSG00000100038.19|0|6641	-0.497538	2.72964	4.93551	0.0271229	0.0379226
ENSG00000100055.20|mRNA|CYTH4|ENSG00000100055.20|ENSG00000100055.20|0|6161	-0.583189	5.70767	9.09508	0.00280213	0.00474879
ENSG00000100056.11|mRNA|ESS2|ENSG00000100056.11|ENSG00000100056.11|0|6003	-0.726684	3.07106	16.7832	5.51441e-05	0.000129486
ENSG00000100058.12|pseudogene|CRYBB2P1|ENSG00000100058.12|ENSG00000100058.12|0|6435	-0.0706965	3.05651	0.220515	0.63902	0.677758
ENSG00000100060.17|mRNA|MFNG|ENSG00000100060.17|ENSG00000100060.17|0|3042	-0.0618211	4.16671	0.226416	0.637747	0.67664
ENSG00000100065.14|mRNA|CARD10|ENSG00000100065.14|ENSG00000100065.14|0|5652	-0.701608	3.13396	11.7705	0.000694009	0.00131992
ENSG00000100075.9|mRNA|SLC25A1|ENSG00000100075.9|ENSG00000100075.9|0|2096	-0.736307	4.22557	33.1992	2.22187e-08	9.62744e-08
ENSG00000100077.14|mRNA|GRK3|ENSG00000100077.14|ENSG00000100077.14|0|9303	0.728886	7.58899	47.8499	3.21363e-11	2.61403e-10
ENSG00000100079.6|mRNA|LGALS2|ENSG00000100079.6|ENSG00000100079.6|0|828	-1.37779	3.67749	69.3122	3.96596e-15	9.9875e-14
ENSG00000100083.18|mRNA|GGA1|ENSG00000100083.18|ENSG00000100083.18|0|9369	-0.887729	3.86098	34.9098	1.01619e-08	4.71236e-08
ENSG00000100084.14|mRNA|HIRA|ENSG00000100084.14|ENSG00000100084.14|0|4299	-0.49158	5.25108	26.0708	6.14773e-07	2.05801e-06
ENSG00000100092.20|mRNA|SH3BP1|ENSG00000100092.20|ENSG00000100092.20|0|6170	-1.42834	5.49688	97.3024	7.48064e-20	5.60908e-18
ENSG00000100097.11|mRNA|LGALS1|ENSG00000100097.11|ENSG00000100097.11|0|1099	-1.33935	5.53237	96.5399	9.94608e-20	7.29319e-18
ENSG00000100099.20|mRNA|HPS4|ENSG00000100099.20|ENSG00000100099.20|0|10782	0.434019	4.99535	9.72129	0.00201429	0.00350479
ENSG00000100100.12|mRNA|PIK3IP1|ENSG00000100100.12|ENSG00000100100.12|0|3805	-0.748799	2.6477	14.269	0.000194162	0.000411405
ENSG00000100101.15|mRNA|Z83844.1|ENSG00000100101.15|ENSG00000100101.15|0|4904	-0.865925	4.30249	41.377	5.52878e-10	3.34177e-09
ENSG00000100104.13|mRNA|SRRD|ENSG00000100104.13|ENSG00000100104.13|0|4319	-1.11754	3.07502	36.412	5.13436e-09	2.53289e-08
ENSG00000100105.17|mRNA|PATZ1|ENSG00000100105.17|ENSG00000100105.17|0|5693	-1.14825	1.83624	27.6679	2.89589e-07	1.02645e-06
ENSG00000100106.19|mRNA|TRIOBP|ENSG00000100106.19|ENSG00000100106.19|0|12238	-0.531878	6.2327	26.3346	5.42708e-07	1.83121e-06
ENSG00000100109.16|mRNA|TFIP11|ENSG00000100109.16|ENSG00000100109.16|0|5436	-1.15646	4.37786	69.0772	4.36204e-15	1.08615e-13
ENSG00000100116.16|mRNA|GCAT|ENSG00000100116.16|ENSG00000100116.16|0|2104	0.187739	1.88163	0.788487	0.375332	0.419525
ENSG00000100124.14|mRNA|ANKRD54|ENSG00000100124.14|ENSG00000100124.14|0|4487	-0.3015	1.91178	2.06778	0.151575	0.183801
ENSG00000100129.17|mRNA|EIF3L|ENSG00000100129.17|ENSG00000100129.17|0|4296	-1.50646	7.61613	167.727	2.77286e-30	1.00554e-27
ENSG00000100138.13|mRNA|SNU13|ENSG00000100138.13|ENSG00000100138.13|0|2780	-0.485094	5.3449	28.0098	2.46653e-07	8.84801e-07
ENSG00000100139.13|mRNA|MICALL1|ENSG00000100139.13|ENSG00000100139.13|0|5968	-0.4952	3.70441	9.21298	0.0026328	0.00448354
ENSG00000100142.14|mRNA|POLR2F|ENSG00000100142.14|ENSG00000100142.14|0|7042	-1.17684	4.1453	59.0867	2.66968e-13	3.97365e-12
ENSG00000100147.13|mRNA|CCDC134|ENSG00000100147.13|ENSG00000100147.13|0|1270	-0.43226	2.9289	7.66652	0.00600725	0.00952724
ENSG00000100150.16|mRNA|DEPDC5|ENSG00000100150.16|ENSG00000100150.16|0|8196	0.189293	4.81092	2.92552	0.0883144	0.112107
ENSG00000100151.15|mRNA|PICK1|ENSG00000100151.15|ENSG00000100151.15|0|4371	-0.941603	1.87672	19.0269	1.82326e-05	4.68559e-05
ENSG00000100154.14|mRNA|TTC28|ENSG00000100154.14|ENSG00000100154.14|0|12645	0.702732	3.09063	17.1932	4.4996e-05	0.000107491
ENSG00000100181.22|pseudogene|TPTEP1|ENSG00000100181.22|ENSG00000100181.22|0|9653	1.30733	9.21459	39.4976	1.27904e-09	7.10004e-09
ENSG00000100201.20|mRNA|DDX17|ENSG00000100201.20|ENSG00000100201.20|0|9995	0.118896	7.72354	1.86124	0.173595	0.20835
ENSG00000100206.9|mRNA|DMC1|ENSG00000100206.9|ENSG00000100206.9|0|3524	1.18094	5.05402	49.8013	1.3803e-11	1.24214e-10
ENSG00000100207.18|mRNA|TCF20|ENSG00000100207.18|ENSG00000100207.18|0|7548	0.390515	2.75305	6.11665	0.0139948	0.0206944
ENSG00000100209.9|mRNA|HSCB|ENSG00000100209.9|ENSG00000100209.9|0|1462	-0.95415	2.90026	30.2407	8.70754e-08	3.39655e-07
ENSG00000100211.10|mRNA|CBY1|ENSG00000100211.10|ENSG00000100211.10|0|2348	-0.0702772	2.94931	0.200596	0.878099	0.897769
ENSG00000100216.5|mRNA|TOMM22|ENSG00000100216.5|ENSG00000100216.5|0|2191	-1.29667	4.12182	76.0558	2.65557e-16	8.85709e-15
ENSG00000100219.16|mRNA|XBP1|ENSG00000100219.16|ENSG00000100219.16|0|3028	-0.347231	5.66828	3.96087	0.0475577	0.0636603
ENSG00000100220.11|mRNA|RTCB|ENSG00000100220.11|ENSG00000100220.11|0|2948	-1.15585	4.8874	71.454	1.6703e-15	4.56359e-14
ENSG00000100221.10|mRNA|JOSD1|ENSG00000100221.10|ENSG00000100221.10|0|4326	1.01523	4.57845	52.9958	3.50297e-12	3.72822e-11
ENSG00000100225.17|mRNA|FBXO7|ENSG00000100225.17|ENSG00000100225.17|0|8521	-0.228525	8.4999	5.3472	0.0214926	0.0306743
ENSG00000100226.15|mRNA|GTPBP1|ENSG00000100226.15|ENSG00000100226.15|0|8166	0.0758104	5.30323	0.53659	0.464472	0.509201
ENSG00000100227.17|mRNA|POLDIP3|ENSG00000100227.17|ENSG00000100227.17|0|3650	-0.578236	4.60686	26.512	4.99091e-07	1.69638e-06
ENSG00000100234.11|mRNA|TIMP3|ENSG00000100234.11|ENSG00000100234.11|0|4603	-0.634911	2.39019	9.67492	0.00206398	0.0035862
ENSG00000100239.15|mRNA|PPP6R2|ENSG00000100239.15|ENSG00000100239.15|0|5349	-0.26171	5.08596	4.70064	0.0310072	0.0429382
ENSG00000100241.20|mRNA|SBF1|ENSG00000100241.20|ENSG00000100241.20|0|9441	-0.436735	5.17363	7.32756	0.00721463	0.0112727
ENSG00000100242.15|mRNA|SUN2|ENSG00000100242.15|ENSG00000100242.15|0|6489	-0.237985	4.96668	1.99523	0.158923	0.192035
ENSG00000100243.20|mRNA|CYB5R3|ENSG00000100243.20|ENSG00000100243.20|0|5973	1.47319	8.96379	76.0616	2.64945e-16	8.85148e-15
ENSG00000100246.12|mRNA|DNAL4|ENSG00000100246.12|ENSG00000100246.12|0|2430	0.227756	3.0604	2.10851	0.147619	0.179408
ENSG00000100258.17|mRNA|LMF2|ENSG00000100258.17|ENSG00000100258.17|0|3054	-0.132526	2.74117	0.284609	0.594126	0.634938
ENSG00000100266.18|mRNA|PACSIN2|ENSG00000100266.18|ENSG00000100266.18|0|4554	1.23015	8.59522	60.9866	1.20858e-13	2.01885e-12
ENSG00000100271.16|mRNA|TTLL1|ENSG00000100271.16|ENSG00000100271.16|0|1749	-0.596918	3.06603	18.2751	2.63745e-05	6.56893e-05
ENSG00000100280.16|mRNA|AP1B1|ENSG00000100280.16|ENSG00000100280.16|0|6721	0.318805	7.22005	10.7697	0.00116471	0.00212652
ENSG00000100281.13|mRNA|HMGXB4|ENSG00000100281.13|ENSG00000100281.13|0|6006	-0.306805	3.57647	5.87124	0.0160348	0.0234623
ENSG00000100284.20|mRNA|TOM1|ENSG00000100284.20|ENSG00000100284.20|0|5871	-0.913484	4.53307	35.9994	6.19098e-09	2.99925e-08
ENSG00000100288.19|mRNA|CHKB|ENSG00000100288.19|ENSG00000100288.19|0|3021	-0.546281	3.07127	6.1491	0.0137459	0.020355
ENSG00000100292.16|mRNA|HMOX1|ENSG00000100292.16|ENSG00000100292.16|0|2405	-1.36854	4.27547	69.2995	3.98638e-15	1.00263e-13
ENSG00000100296.13|mRNA|THOC5|ENSG00000100296.13|ENSG00000100296.13|0|7878	-0.672969	5.00864	44.6427	1.3051e-10	9.12703e-10
ENSG00000100297.15|mRNA|MCM5|ENSG00000100297.15|ENSG00000100297.15|0|7338	-0.864958	4.80198	35.9298	6.38965e-09	3.0865e-08
ENSG00000100299.17|mRNA|ARSA|ENSG00000100299.17|ENSG00000100299.17|0|2932	0.603625	2.77087	9.02849	0.00290266	0.0049029
ENSG00000100300.17|mRNA|TSPO|ENSG00000100300.17|ENSG00000100300.17|0|1455	-1.48196	4.074	94.609	2.05181e-19	1.44606e-17
ENSG00000100304.12|mRNA|TTLL12|ENSG00000100304.12|ENSG00000100304.12|0|4622	-1.02736	3.61873	36.3041	5.39179e-09	2.64875e-08
ENSG00000100307.12|mRNA|CBX7|ENSG00000100307.12|ENSG00000100307.12|0|7461	-0.74211	3.77254	26.7896	4.37805e-07	1.50526e-06
ENSG00000100311.16|mRNA|PDGFB|ENSG00000100311.16|ENSG00000100311.16|0|3761	0.6508	3.11408	12.2556	0.000540856	0.00105099
ENSG00000100316.15|mRNA|RPL3|ENSG00000100316.15|ENSG00000100316.15|0|4787	-1.55386	10.359	160.347	2.84129e-29	8.58629e-27
ENSG00000100319.12|mRNA|ZMAT5|ENSG00000100319.12|ENSG00000100319.12|0|3200	-0.890622	2.98925	32.9346	2.50882e-08	1.07795e-07
ENSG00000100324.13|mRNA|TAB1|ENSG00000100324.13|ENSG00000100324.13|0|4456	-0.845646	2.99801	23.2277	2.38082e-06	7.1396e-06
ENSG00000100325.14|mRNA|ASCC2|ENSG00000100325.14|ENSG00000100325.14|0|5416	-0.901687	6.12748	54.3859	1.93774e-12	2.22244e-11
ENSG00000100330.15|mRNA|MTMR3|ENSG00000100330.15|ENSG00000100330.15|0|9903	-0.244011	5.31486	7.00412	0.00859996	0.0132412
ENSG00000100335.13|mRNA|MIEF1|ENSG00000100335.13|ENSG00000100335.13|0|7555	0.105763	3.42293	0.659071	0.417589	0.462455
ENSG00000100344.10|mRNA|PNPLA3|ENSG00000100344.10|ENSG00000100344.10|0|3232	-0.995201	2.71067	26.5204	4.97114e-07	1.69082e-06
ENSG00000100345.20|mRNA|MYH9|ENSG00000100345.20|ENSG00000100345.20|0|8959	1.31838	13.1217	62.4082	6.70067e-14	1.1869e-12
ENSG00000100347.14|mRNA|SAMM50|ENSG00000100347.14|ENSG00000100347.14|0|6435	-1.33445	4.05692	77.0557	1.78681e-16	6.37531e-15
ENSG00000100348.9|mRNA|TXN2|ENSG00000100348.9|ENSG00000100348.9|0|2050	-1.26097	4.39972	75.2802	3.614e-16	1.16309e-14
ENSG00000100351.16|mRNA|GRAP2|ENSG00000100351.16|ENSG00000100351.16|0|6190	1.32737	10.6134	47.503	3.73666e-11	2.98349e-10
ENSG00000100353.17|mRNA|EIF3D|ENSG00000100353.17|ENSG00000100353.17|0|4070	-1.30027	7.15948	154.353	1.93691e-28	4.95278e-26
ENSG00000100354.20|mRNA|TNRC6B|ENSG00000100354.20|ENSG00000100354.20|0|19998	0.136904	6.18473	2.11201	0.147285	0.179034
ENSG00000100359.20|mRNA|SGSM3|ENSG00000100359.20|ENSG00000100359.20|0|4770	0.112251	5.26222	0.743316	0.38935	0.433735
ENSG00000100360.14|mRNA|IFT27|ENSG00000100360.14|ENSG00000100360.14|0|8009	-0.739886	2.22397	13.2258	0.00032949	0.000668398
ENSG00000100362.12|mRNA|PVALB|ENSG00000100362.12|ENSG00000100362.12|0|1050	1.15538	7.29311	26.3002	5.51606e-07	1.85872e-06
ENSG00000100364.18|mRNA|KIAA0930|ENSG00000100364.18|ENSG00000100364.18|0|10019	-0.956738	5.51326	55.4053	1.25741e-12	1.52642e-11
ENSG00000100365.14|mRNA|NCF4|ENSG00000100365.14|ENSG00000100365.14|0|1759	-1.03477	5.30505	45.5872	8.62354e-11	6.32573e-10
ENSG00000100368.13|mRNA|CSF2RB|ENSG00000100368.13|ENSG00000100368.13|0|5000	0.115992	4.53343	0.161756	0.687856	0.724164
ENSG00000100372.14|mRNA|SLC25A17|ENSG00000100372.14|ENSG00000100372.14|0|3989	0.161183	3.38843	1.33553	0.248826	0.288671
ENSG00000100376.11|mRNA|FAM118A|ENSG00000100376.11|ENSG00000100376.11|0|6512	0.166542	3.26425	0.467653	0.494644	0.538784
ENSG00000100379.17|mRNA|KCTD17|ENSG00000100379.17|ENSG00000100379.17|0|2786	-0.922908	2.10605	18.6613	2.18134e-05	5.52819e-05
ENSG00000100380.13|mRNA|ST13|ENSG00000100380.13|ENSG00000100380.13|0|4147	-0.42951	8.68991	33.467	1.96504e-08	8.60242e-08
ENSG00000100385.13|mRNA|IL2RB|ENSG00000100385.13|ENSG00000100385.13|0|4700	-1.00733	3.18043	26.7961	4.36483e-07	1.50175e-06
ENSG00000100387.8|mRNA|RBX1|ENSG00000100387.8|ENSG00000100387.8|0|3092	1.08203	8.52307	43.229	2.43311e-10	1.59266e-09
ENSG00000100393.12|mRNA|EP300|ENSG00000100393.12|ENSG00000100393.12|0|12500	0.214985	7.63513	6.46741	0.0115341	0.0173424
ENSG00000100395.14|mRNA|L3MBTL2|ENSG00000100395.14|ENSG00000100395.14|0|6451	-0.610183	3.41417	12.8868	0.000391621	0.000783518
ENSG00000100401.19|mRNA|RANGAP1|ENSG00000100401.19|ENSG00000100401.19|0|5348	-0.631889	5.10648	24.0598	1.59888e-06	4.94489e-06
ENSG00000100403.11|mRNA|ZC3H7B|ENSG00000100403.11|ENSG00000100403.11|0|10525	-0.381743	5.27236	12.6804	0.000435143	0.000863145
ENSG00000100410.7|mRNA|PHF5A|ENSG00000100410.7|ENSG00000100410.7|0|1235	-0.739914	3.90439	35.9721	6.26807e-09	3.03291e-08
ENSG00000100412.15|mRNA|ACO2|ENSG00000100412.15|ENSG00000100412.15|0|4041	-0.768966	5.01159	36.7868	4.33306e-09	2.16599e-08
ENSG00000100413.16|mRNA|POLR3H|ENSG00000100413.16|ENSG00000100413.16|0|6594	-1.20157	1.9565	30.7998	6.71784e-08	2.67173e-07
ENSG00000100416.12|mRNA|TRMU|ENSG00000100416.12|ENSG00000100416.12|0|8390	-0.13205	3.08572	0.941501	0.332743	0.375924
ENSG00000100417.11|mRNA|PMM1|ENSG00000100417.11|ENSG00000100417.11|0|5082	-1.01172	2.7855	35.7486	6.93761e-09	3.32302e-08
ENSG00000100418.7|mRNA|DESI1|ENSG00000100418.7|ENSG00000100418.7|0|4972	-0.222841	4.36217	4.07413	0.0445133	0.0598986
ENSG00000100422.13|mRNA|CERK|ENSG00000100422.13|ENSG00000100422.13|0|4938	-1.12462	4.98689	57.4228	5.36584e-13	7.23608e-12
ENSG00000100425.18|mRNA|BRD1|ENSG00000100425.18|ENSG00000100425.18|0|5850	-0.344204	4.14894	5.70343	0.0176055	0.0255635
ENSG00000100426.6|mRNA|ZBED4|ENSG00000100426.6|ENSG00000100426.6|0|6893	0.992836	2.51187	24.5688	1.25425e-06	3.96325e-06
ENSG00000100427.15|mRNA|MLC1|ENSG00000100427.15|ENSG00000100427.15|0|4297	1.33698	4.11826	33.5784	1.86719e-08	8.21012e-08
ENSG00000100429.17|mRNA|HDAC10|ENSG00000100429.17|ENSG00000100429.17|0|4951	0.093897	4.09508	0.423225	0.515874	0.559738
ENSG00000100439.10|mRNA|ABHD4|ENSG00000100439.10|ENSG00000100439.10|0|4070	1.15415	5.24039	44.1034	1.65456e-10	1.12706e-09
ENSG00000100441.9|mRNA|KHNYN|ENSG00000100441.9|ENSG00000100441.9|0|8015	-0.701689	3.64255	20.9783	7.04262e-06	1.94685e-05
ENSG00000100442.10|mRNA|FKBP3|ENSG00000100442.10|ENSG00000100442.10|0|2262	0.138472	6.87004	1.8877	0.170578	0.204976
ENSG00000100445.17|mRNA|SDR39U1|ENSG00000100445.17|ENSG00000100445.17|0|3099	-0.177644	2.54035	1.02325	0.312636	0.355381
ENSG00000100448.3|mRNA|CTSG|ENSG00000100448.3|ENSG00000100448.3|0|1374	-1.55295	2.29089	37.758	2.7946e-09	1.4519e-08
ENSG00000100450.12|mRNA|GZMH|ENSG00000100450.12|ENSG00000100450.12|0|951	-1.55782	3.90296	78.3034	1.09169e-16	4.13951e-15
ENSG00000100453.12|mRNA|GZMB|ENSG00000100453.12|ENSG00000100453.12|0|1411	-0.60063	5.8949	6.57208	0.01089	0.0164584
ENSG00000100461.17|mRNA|RBM23|ENSG00000100461.17|ENSG00000100461.17|0|14022	-0.26103	8.37313	12.0175	0.000611191	0.00117541
ENSG00000100462.15|mRNA|PRMT5|ENSG00000100462.15|ENSG00000100462.15|0|3467	-0.86971	3.88473	36.4161	5.12503e-09	2.52892e-08
ENSG00000100473.15|mRNA|COCH|ENSG00000100473.15|ENSG00000100473.15|0|3621	0.452387	2.21028	4.96166	0.026723	0.037408
ENSG00000100478.14|mRNA|AP4S1|ENSG00000100478.14|ENSG00000100478.14|0|7223	0.455353	3.47986	8.92491	0.00306639	0.00515155
ENSG00000100479.12|mRNA|POLE2|ENSG00000100479.12|ENSG00000100479.12|0|2955	1.16351	7.20675	43.2565	2.40376e-10	1.57603e-09
ENSG00000100485.11|mRNA|SOS2|ENSG00000100485.11|ENSG00000100485.11|0|6938	0.249066	6.93962	9.15845	0.00270979	0.00460403
ENSG00000100490.9|mRNA|CDKL1|ENSG00000100490.9|ENSG00000100490.9|0|6149	1.26794	6.31839	54.8264	1.60714e-12	1.88113e-11
ENSG00000100503.23|mRNA|NIN|ENSG00000100503.23|ENSG00000100503.23|0|13683	0.612252	8.32732	31.1584	5.68998e-08	2.28666e-07
ENSG00000100504.16|mRNA|PYGL|ENSG00000100504.16|ENSG00000100504.16|0|4798	0.941624	8.41182	38.5546	1.95257e-09	1.0452e-08
ENSG00000100519.11|mRNA|PSMC6|ENSG00000100519.11|ENSG00000100519.11|0|7482	-0.709546	5.73566	61.1296	1.13883e-13	1.91518e-12
ENSG00000100522.8|mRNA|GNPNAT1|ENSG00000100522.8|ENSG00000100522.8|0|4009	-0.916138	3.18932	26.9341	4.08995e-07	1.41303e-06
ENSG00000100523.14|mRNA|DDHD1|ENSG00000100523.14|ENSG00000100523.14|0|17944	-0.119036	3.82735	0.687911	0.407594	0.452214
ENSG00000100526.19|mRNA|CDKN3|ENSG00000100526.19|ENSG00000100526.19|0|1836	0.286675	4.9823	4.52381	0.0343148	0.0471259
ENSG00000100528.11|mRNA|CNIH1|ENSG00000100528.11|ENSG00000100528.11|0|5060	-0.0256184	4.6992	0.0424686	0.836881	0.861191
ENSG00000100532.11|mRNA|CGRRF1|ENSG00000100532.11|ENSG00000100532.11|0|4564	1.16132	5.55895	45.9124	7.47928e-11	5.55998e-10
ENSG00000100554.11|mRNA|ATP6V1D|ENSG00000100554.11|ENSG00000100554.11|0|4251	0.719999	6.41302	45.3286	9.65818e-11	6.99149e-10
ENSG00000100558.8|mRNA|PLEK2|ENSG00000100558.8|ENSG00000100558.8|0|1603	-0.97475	2.24453	16.2266	7.2736e-05	0.000167095
ENSG00000100567.12|mRNA|PSMA3|ENSG00000100567.12|ENSG00000100567.12|0|3119	-0.72354	5.45245	49.718	1.43086e-11	1.27689e-10
ENSG00000100568.10|mRNA|VTI1B|ENSG00000100568.10|ENSG00000100568.10|0|5789	0.301691	7.79528	12.1612	0.000567709	0.00109889
ENSG00000100575.13|mRNA|TIMM9|ENSG00000100575.13|ENSG00000100575.13|0|1500	-1.13553	3.8112	65.7611	1.68467e-14	3.5295e-13
ENSG00000100578.14|mRNA|KIAA0586|ENSG00000100578.14|ENSG00000100578.14|0|10184	0.21055	5.30934	4.18231	0.0417978	0.0565192
ENSG00000100580.7|mRNA|TMED8|ENSG00000100580.7|ENSG00000100580.7|0|7784	0.826702	4.91688	32.9031	2.54544e-08	1.09133e-07
ENSG00000100591.7|mRNA|AHSA1|ENSG00000100591.7|ENSG00000100591.7|0|2948	-0.691535	5.84683	58.9676	2.8061e-13	4.15191e-12
ENSG00000100592.15|mRNA|DAAM1|ENSG00000100592.15|ENSG00000100592.15|0|10712	1.26222	9.11688	51.9875	5.39155e-12	5.47528e-11
ENSG00000100596.6|mRNA|SPTLC2|ENSG00000100596.6|ENSG00000100596.6|0|9143	0.436318	4.51437	10.8903	0.00109398	0.00200695
ENSG00000100599.15|mRNA|RIN3|ENSG00000100599.15|ENSG00000100599.15|0|8683	-0.850973	5.06107	42.1985	3.83906e-10	2.40938e-09
ENSG00000100600.14|mRNA|LGMN|ENSG00000100600.14|ENSG00000100600.14|0|3899	1.14419	5.63695	56.8536	6.81926e-13	8.83183e-12
ENSG00000100601.9|mRNA|ALKBH1|ENSG00000100601.9|ENSG00000100601.9|0|2844	-1.28235	2.26757	39.3521	1.36517e-09	7.54038e-09
ENSG00000100603.13|mRNA|SNW1|ENSG00000100603.13|ENSG00000100603.13|0|2432	0.130658	7.46394	2.03661	0.154684	0.187263
ENSG00000100605.16|mRNA|ITPK1|ENSG00000100605.16|ENSG00000100605.16|0|6783	-0.94661	5.05291	43.9596	1.76273e-10	1.19178e-09
ENSG00000100612.13|mRNA|DHRS7|ENSG00000100612.13|ENSG00000100612.13|0|3248	0.118922	5.1237	0.888804	0.346627	0.390151
ENSG00000100614.17|mRNA|PPM1A|ENSG00000100614.17|ENSG00000100614.17|0|11860	1.16835	8.77681	70.1949	2.77506e-15	7.18813e-14
ENSG00000100629.16|mRNA|CEP128|ENSG00000100629.16|ENSG00000100629.16|0|9400	0.738163	6.49261	41.6856	4.82033e-10	2.95184e-09
ENSG00000100632.10|mRNA|ERH|ENSG00000100632.10|ENSG00000100632.10|0|1446	-0.815533	5.41767	59.3354	2.40594e-13	3.64916e-12
ENSG00000100644.16|mRNA|HIF1A|ENSG00000100644.16|ENSG00000100644.16|0|5151	0.13561	7.34138	2.48282	0.116243	0.14421
ENSG00000100647.7|mRNA|SUSD6|ENSG00000100647.7|ENSG00000100647.7|0|5830	0.530883	3.73425	13.0973	0.000351768	0.000709836
ENSG00000100650.15|mRNA|SRSF5|ENSG00000100650.15|ENSG00000100650.15|0|5357	-0.605468	6.54645	28.3028	2.15003e-07	7.79537e-07
ENSG00000100664.10|mRNA|EIF5|ENSG00000100664.10|ENSG00000100664.10|0|8505	0.104996	7.62889	1.61581	0.204748	0.242342
ENSG00000100678.18|mRNA|SLC8A3|ENSG00000100678.18|ENSG00000100678.18|0|8444	1.48352	4.32829	46.9815	4.68944e-11	3.66788e-10
ENSG00000100697.14|mRNA|DICER1|ENSG00000100697.14|ENSG00000100697.14|0|12294	0.305267	7.0657	10.2452	0.00153081	0.00273462
ENSG00000100711.13|mRNA|ZFYVE21|ENSG00000100711.13|ENSG00000100711.13|0|8390	0.896218	6.08221	43.4053	2.25089e-10	1.48361e-09
ENSG00000100714.15|mRNA|MTHFD1|ENSG00000100714.15|ENSG00000100714.15|0|9377	-1.02692	4.85838	84.7098	8.9476e-18	4.46149e-16
ENSG00000100721.10|mRNA|TCL1A|ENSG00000100721.10|ENSG00000100721.10|0|2236	-1.4451	3.76999	66.7815	1.10993e-14	2.45397e-13
ENSG00000100722.18|mRNA|ZC3H14|ENSG00000100722.18|ENSG00000100722.18|0|20977	0.228072	5.89553	6.18902	0.013446	0.0199658
ENSG00000100726.14|mRNA|TELO2|ENSG00000100726.14|ENSG00000100726.14|0|4239	-0.483478	2.90475	3.7977	0.0523379	0.0694901
ENSG00000100731.15|mRNA|PCNX1|ENSG00000100731.15|ENSG00000100731.15|0|16715	-0.0943813	4.97034	0.470303	0.493424	0.537543
ENSG00000100744.14|mRNA|GSKIP|ENSG00000100744.14|ENSG00000100744.14|0|4567	-0.492254	2.88467	11.3743	0.000851405	0.0015909
ENSG00000100749.7|mRNA|VRK1|ENSG00000100749.7|ENSG00000100749.7|0|2744	0.144946	6.62557	2.06015	0.152329	0.184636
ENSG00000100764.13|mRNA|PSMC1|ENSG00000100764.13|ENSG00000100764.13|0|6161	-0.934559	5.9103	84.8675	8.41812e-18	4.2292e-16
ENSG00000100767.15|mRNA|PAPLN|ENSG00000100767.15|ENSG00000100767.15|0|7699	1.29372	2.55467	7.37355	0.00703715	0.0110178
ENSG00000100784.10|mRNA|RPS6KA5|ENSG00000100784.10|ENSG00000100784.10|0|27726	-0.172669	4.42555	3.17562	0.0758461	0.0975842
ENSG00000100796.17|mRNA|PPP4R3A|ENSG00000100796.17|ENSG00000100796.17|0|5912	-0.214001	6.86832	5.97426	0.0151433	0.0222607
ENSG00000100802.14|mRNA|C14orf93|ENSG00000100802.14|ENSG00000100802.14|0|4243	-0.666595	2.06571	11.7301	0.000708613	0.00134526
ENSG00000100804.18|mRNA|PSMB5|ENSG00000100804.18|ENSG00000100804.18|0|1765	-0.897398	2.54106	23.6813	1.91592e-06	5.84385e-06
ENSG00000100811.12|mRNA|YY1|ENSG00000100811.12|ENSG00000100811.12|0|8720	0.00232444	5.59583	0.000744474	0.978252	0.982534
ENSG00000100813.14|mRNA|ACIN1|ENSG00000100813.14|ENSG00000100813.14|0|9110	-0.73335	7.28067	29.7897	1.07389e-07	4.12218e-07
ENSG00000100814.17|mRNA|CCNB1IP1|ENSG00000100814.17|ENSG00000100814.17|0|3680	-0.406228	3.48174	9.32139	0.00248634	0.00425374
ENSG00000100815.12|mRNA|TRIP11|ENSG00000100815.12|ENSG00000100815.12|0|10372	0.792798	6.95825	40.2002	9.34155e-10	5.33554e-09
ENSG00000100823.11|mRNA|APEX1|ENSG00000100823.11|ENSG00000100823.11|0|1886	-0.944321	5.17992	67.3717	8.72465e-15	1.991e-13
ENSG00000100836.10|mRNA|PABPN1|ENSG00000100836.10|ENSG00000100836.10|0|3876	0.19803	7.60615	5.59596	0.0186945	0.0270112
ENSG00000100852.12|mRNA|ARHGAP5|ENSG00000100852.12|ENSG00000100852.12|0|10888	0.613155	5.70419	24.7418	1.15505e-06	3.67482e-06
ENSG00000100865.14|mRNA|CINP|ENSG00000100865.14|ENSG00000100865.14|0|5344	-0.990932	3.03284	34.5275	1.20975e-08	5.53406e-08
ENSG00000100883.11|mRNA|SRP54|ENSG00000100883.11|ENSG00000100883.11|0|3903	-0.326708	5.69437	14.9071	0.000140783	0.000306943
ENSG00000100888.12|mRNA|CHD8|ENSG00000100888.12|ENSG00000100888.12|0|9781	-0.455492	6.05371	17.5825	3.7113e-05	9.00948e-05
ENSG00000100889.11|mRNA|PCK2|ENSG00000100889.11|ENSG00000100889.11|0|4189	-0.373173	3.07625	6.05574	0.0144746	0.0213375
ENSG00000100890.15|mRNA|KIAA0391|ENSG00000100890.15|ENSG00000100890.15|0|6982	-0.774241	3.37868	30.629	7.27139e-08	2.87411e-07
ENSG00000100897.17|mRNA|DCAF11|ENSG00000100897.17|ENSG00000100897.17|0|6350	-0.691737	5.64774	57.306	5.63611e-13	7.51922e-12
ENSG00000100902.10|mRNA|PSMA6|ENSG00000100902.10|ENSG00000100902.10|0|6506	-0.253117	6.88762	9.14545	0.00272847	0.00463301
ENSG00000100906.10|mRNA|NFKBIA|ENSG00000100906.10|ENSG00000100906.10|0|2373	-0.878999	5.57952	40.5404	8.02524e-10	4.66385e-09
ENSG00000100911.15|mRNA|PSME2|ENSG00000100911.15|ENSG00000100911.15|0|3582	-1.19957	6.65709	88.8512	1.82024e-18	1.05845e-16
ENSG00000100916.13|mRNA|BRMS1L|ENSG00000100916.13|ENSG00000100916.13|0|3897	0.19888	3.50778	2.50098	0.384513	0.428778
ENSG00000100918.12|mRNA|REC8|ENSG00000100918.12|ENSG00000100918.12|0|3844	-0.401959	2.82538	2.66125	0.103962	0.130116
ENSG00000100926.14|mRNA|TM9SF1|ENSG00000100926.14|ENSG00000100926.14|0|3536	0.561857	2.2907	6.22503	0.0131812	0.0196106
ENSG00000100934.14|mRNA|SEC23A|ENSG00000100934.14|ENSG00000100934.14|0|8945	0.45325	5.86037	14.2083	0.00020021	0.000423277
ENSG00000100938.17|mRNA|GMPR2|ENSG00000100938.17|ENSG00000100938.17|0|3640	-0.520763	4.75384	34.4831	1.2345e-08	5.63418e-08
ENSG00000100941.8|mRNA|PNN|ENSG00000100941.8|ENSG00000100941.8|0|4201	0.137578	7.92704	3.20527	0.0744994	0.0960498
ENSG00000100949.14|mRNA|RABGGTA|ENSG00000100949.14|ENSG00000100949.14|0|3545	-1.25609	3.31442	48.3243	2.61533e-11	2.18028e-10
ENSG00000100979.14|mRNA|PLTP|ENSG00000100979.14|ENSG00000100979.14|0|2541	0.881659	3.71808	23.2485	2.35711e-06	7.07807e-06
ENSG00000100982.11|mRNA|PCIF1|ENSG00000100982.11|ENSG00000100982.11|0|3219	0.103043	5.57693	1.17551	0.27922	0.320428
ENSG00000100983.9|mRNA|GSS|ENSG00000100983.9|ENSG00000100983.9|0|1922	0.0559907	4.76431	0.299485	0.584649	0.626219
ENSG00000100985.7|mRNA|MMP9|ENSG00000100985.7|ENSG00000100985.7|0|2336	-0.843113	2.39464	11.4919	0.000801224	0.00150432
ENSG00000100991.11|mRNA|TRPC4AP|ENSG00000100991.11|ENSG00000100991.11|0|3226	-0.55689	4.6967	14.0181	0.000220418	0.00046242
ENSG00000100994.11|mRNA|PYGB|ENSG00000100994.11|ENSG00000100994.11|0|4474	1.4699	7.88979	61.8154	8.56642e-14	1.47418e-12
ENSG00000100997.18|mRNA|ABHD12|ENSG00000100997.18|ENSG00000100997.18|0|3429	0.252498	3.2767	2.67536	0.103054	0.129036
ENSG00000101003.9|mRNA|GINS1|ENSG00000101003.9|ENSG00000101003.9|0|4068	0.715508	3.89523	22.0116	4.27271e-06	1.2306e-05
ENSG00000101017.13|mRNA|CD40|ENSG00000101017.13|ENSG00000101017.13|0|2527	0.517812	3.75322	13.0793	0.000354996	0.000715988
ENSG00000101019.21|mRNA|UQCC1|ENSG00000101019.21|ENSG00000101019.21|0|6782	0.449633	4.22965	11.0281	0.00101852	0.00187975
ENSG00000101040.19|mRNA|ZMYND8|ENSG00000101040.19|ENSG00000101040.19|0|7625	0.81685	7.54767	41.872	4.43735e-10	2.73749e-09
ENSG00000101052.12|mRNA|IFT52|ENSG00000101052.12|ENSG00000101052.12|0|2542	-0.883162	4.0967	62.4875	6.48432e-14	1.1537e-12
ENSG00000101057.15|mRNA|MYBL2|ENSG00000101057.15|ENSG00000101057.15|0|2777	-1.0672	4.54111	40.1622	9.50141e-10	5.41909e-09
ENSG00000101079.20|mRNA|NDRG3|ENSG00000101079.20|ENSG00000101079.20|0|3248	0.538198	6.08051	19.6912	1.31738e-05	3.47187e-05
ENSG00000101082.13|mRNA|SLA2|ENSG00000101082.13|ENSG00000101082.13|0|2757	1.41713	6.60513	64.2334	3.15443e-14	6.13208e-13
ENSG00000101084.17|mRNA|C20orf24|ENSG00000101084.17|ENSG00000101084.17|0|1549	-0.693747	4.33241	41.255	5.83722e-10	3.50567e-09
ENSG00000101096.19|mRNA|NFATC2|ENSG00000101096.19|ENSG00000101096.19|0|8286	-0.134448	6.01668	1.59362	0.207877	0.24568
ENSG00000101104.12|mRNA|PABPC1L|ENSG00000101104.12|ENSG00000101104.12|0|4984	0.616299	2.38422	3.37464	0.0672838	0.087465
ENSG00000101109.11|mRNA|STK4|ENSG00000101109.11|ENSG00000101109.11|0|9075	0.826411	9.24867	51.1655	7.67114e-12	7.44168e-11
ENSG00000101126.15|mRNA|ADNP|ENSG00000101126.15|ENSG00000101126.15|0|7081	0.287489	4.37713	6.09528	0.0141612	0.0209188
ENSG00000101132.9|mRNA|PFDN4|ENSG00000101132.9|ENSG00000101132.9|0|1975	-1.05208	4.30944	38.4287	2.0662e-09	1.09982e-08
ENSG00000101138.11|mRNA|CSTF1|ENSG00000101138.11|ENSG00000101138.11|0|4800	-1.16693	2.93793	48.677	2.24451e-11	1.90335e-10
ENSG00000101146.12|mRNA|RAE1|ENSG00000101146.12|ENSG00000101146.12|0|5855	-1.20886	3.49939	57.2642	5.73618e-13	7.6323e-12
ENSG00000101150.17|mRNA|TPD52L2|ENSG00000101150.17|ENSG00000101150.17|0|4694	-0.502868	5.04642	24.7106	1.17232e-06	3.72382e-06
ENSG00000101152.10|mRNA|DNAJC5|ENSG00000101152.10|ENSG00000101152.10|0|5287	-0.402203	3.95224	10.084	0.00166549	0.0029501
ENSG00000101158.13|mRNA|NELFCD|ENSG00000101158.13|ENSG00000101158.13|0|6298	0.0885577	5.43216	1.0171	0.314093	0.356895
ENSG00000101160.13|mRNA|CTSZ|ENSG00000101160.13|ENSG00000101160.13|0|2038	-0.368479	5.56538	5.33542	0.0216355	0.0308582
ENSG00000101161.7|mRNA|PRPF6|ENSG00000101161.7|ENSG00000101161.7|0|3044	-0.955928	6.52487	70.527	2.42673e-15	6.33523e-14
ENSG00000101162.3|mRNA|TUBB1|ENSG00000101162.3|ENSG00000101162.3|0|3496	1.50558	10.5962	52.4313	4.45873e-12	4.63415e-11
ENSG00000101166.15|mRNA|PRELID3B|ENSG00000101166.15|ENSG00000101166.15|0|2977	-0.799921	4.22799	42.7232	3.04288e-10	1.94333e-09
ENSG00000101181.17|mRNA|MTG2|ENSG00000101181.17|ENSG00000101181.17|0|5209	-1.32796	2.38673	45.9741	7.28022e-11	5.43022e-10
ENSG00000101182.14|mRNA|PSMA7|ENSG00000101182.14|ENSG00000101182.14|0|1750	-0.870101	6.98113	90.7831	8.71631e-19	5.41579e-17
ENSG00000101189.6|mRNA|MRGBP|ENSG00000101189.6|ENSG00000101189.6|0|2781	-1.16534	3.12368	53.6815	2.61493e-12	2.87196e-11
ENSG00000101190.12|mRNA|TCFL5|ENSG00000101190.12|ENSG00000101190.12|0|3436	-0.919099	3.30584	38.7571	1.78273e-09	9.60987e-09
ENSG00000101191.16|mRNA|DIDO1|ENSG00000101191.16|ENSG00000101191.16|0|13281	-0.00941011	4.50969	0.00381921	0.950767	0.960641
ENSG00000101193.7|mRNA|GID8|ENSG00000101193.7|ENSG00000101193.7|0|4622	-0.297661	5.49785	10.7307	0.00118856	0.00216749
ENSG00000101199.12|mRNA|ARFGAP1|ENSG00000101199.12|ENSG00000101199.12|0|6613	-0.763873	2.79451	14.5335	0.000169907	0.000364662
ENSG00000101216.10|mRNA|GMEB2|ENSG00000101216.10|ENSG00000101216.10|0|4707	-0.772044	2.9053	17.7915	3.34742e-05	8.18391e-05
ENSG00000101220.17|mRNA|C20orf27|ENSG00000101220.17|ENSG00000101220.17|0|2415	-1.2059	3.97844	56.7939	6.99308e-13	9.02763e-12
ENSG00000101224.17|mRNA|CDC25B|ENSG00000101224.17|ENSG00000101224.17|0|4314	-1.30084	4.76897	74.9494	4.12246e-16	1.28272e-14
ENSG00000101236.16|mRNA|RNF24|ENSG00000101236.16|ENSG00000101236.16|0|7668	1.01457	6.954	31.2307	5.50301e-08	2.21777e-07
ENSG00000101246.19|mRNA|ARFRP1|ENSG00000101246.19|ENSG00000101246.19|0|7627	-0.111086	4.18316	0.842521	0.35948	0.403343
ENSG00000101247.17|mRNA|NDUFAF5|ENSG00000101247.17|ENSG00000101247.17|0|7217	-0.515567	2.06376	7.00577	0.00859225	0.0132303
ENSG00000101265.15|mRNA|RASSF2|ENSG00000101265.15|ENSG00000101265.15|0|5759	-0.832854	6.26679	39.0687	1.55012e-09	8.46812e-09
ENSG00000101266.17|mRNA|CSNK2A1|ENSG00000101266.17|ENSG00000101266.17|0|6047	-0.416747	5.40861	19.7821	1.26023e-05	3.32962e-05
ENSG00000101290.13|mRNA|CDS2|ENSG00000101290.13|ENSG00000101290.13|0|11893	1.26174	6.25628	56.2247	8.89162e-13	1.11748e-11
ENSG00000101294.16|mRNA|HM13|ENSG00000101294.16|ENSG00000101294.16|0|10000	-0.175765	4.64213	1.30315	0.254631	0.294549
ENSG00000101298.13|mRNA|SNPH|ENSG00000101298.13|ENSG00000101298.13|0|5574	1.12251	2.56496	23.9954	1.64883e-06	5.08991e-06
ENSG00000101307.15|mRNA|SIRPB1|ENSG00000101307.15|ENSG00000101307.15|0|6091	-0.505819	3.16191	4.49274	0.0349331	0.0479157
ENSG00000101310.14|mRNA|SEC23B|ENSG00000101310.14|ENSG00000101310.14|0|4039	-0.5363	5.01314	29.2171	1.40229e-07	5.2533e-07
ENSG00000101311.15|mRNA|FERMT1|ENSG00000101311.15|ENSG00000101311.15|0|5359	0.706258	1.87828	6.94221	0.00889497	0.0136595
ENSG00000101331.15|mRNA|CCM2L|ENSG00000101331.15|ENSG00000101331.15|0|2587	-1.35596	2.33599	32.6806	2.81955e-08	1.20008e-07
ENSG00000101333.16|mRNA|PLCB4|ENSG00000101333.16|ENSG00000101333.16|0|6900	0.934624	6.61916	45.0164	1.10757e-10	7.88101e-10
ENSG00000101335.9|mRNA|MYL9|ENSG00000101335.9|ENSG00000101335.9|0|2821	1.47744	10.0786	57.5609	5.06302e-13	6.88357e-12
ENSG00000101336.13|mRNA|HCK|ENSG00000101336.13|ENSG00000101336.13|0|3092	-1.23731	6.21552	93.9812	2.59868e-19	1.79345e-17
ENSG00000101337.15|mRNA|TM9SF4|ENSG00000101337.15|ENSG00000101337.15|0|5415	0.625733	4.74996	23.1534	2.46718e-06	7.37751e-06
ENSG00000101343.14|mRNA|CRNKL1|ENSG00000101343.14|ENSG00000101343.14|0|4567	-0.682931	5.80424	53.6496	2.65069e-12	2.90483e-11
ENSG00000101346.13|mRNA|POFUT1|ENSG00000101346.13|ENSG00000101346.13|0|6426	-0.962422	2.09166	19.5347	1.42202e-05	3.72354e-05
ENSG00000101347.8|mRNA|SAMHD1|ENSG00000101347.8|ENSG00000101347.8|0|5038	-0.659441	7.23824	20.2458	1.00526e-05	2.70143e-05
ENSG00000101350.7|mRNA|KIF3B|ENSG00000101350.7|ENSG00000101350.7|0|6103	-0.686225	4.58264	45.8296	7.75515e-11	5.74579e-10
ENSG00000101353.14|mRNA|MROH8|ENSG00000101353.14|ENSG00000101353.14|0|3878	0.388827	2.31908	4.18062	0.041839	0.0565671
ENSG00000101361.16|mRNA|NOP56|ENSG00000101361.16|ENSG00000101361.16|0|5398	-1.00703	5.15543	44.9995	1.11582e-10	7.93404e-10
ENSG00000101363.12|mRNA|MANBAL|ENSG00000101363.12|ENSG00000101363.12|0|2045	-0.693506	2.02644	10.5249	0.00132297	0.00239249
ENSG00000101365.20|mRNA|IDH3B|ENSG00000101365.20|ENSG00000101365.20|0|2567	-0.818173	4.67497	36.1857	5.68907e-09	2.78246e-08
ENSG00000101367.8|mRNA|MAPRE1|ENSG00000101367.8|ENSG00000101367.8|0|2623	0.592894	7.62993	35.7644	6.88802e-09	3.30244e-08
ENSG00000101391.20|mRNA|CDK5RAP1|ENSG00000101391.20|ENSG00000101391.20|0|4567	-0.279717	3.36747	3.92288	0.0486274	0.0649527
ENSG00000101407.12|mRNA|TTI1|ENSG00000101407.12|ENSG00000101407.12|0|4479	-0.413496	2.66612	3.43454	0.0649154	0.0846178
ENSG00000101412.12|mRNA|E2F1|ENSG00000101412.12|ENSG00000101412.12|0|2503	1.23856	3.86354	32.9254	2.5195e-08	1.0816e-07
ENSG00000101413.11|mRNA|RPRD1B|ENSG00000101413.11|ENSG00000101413.11|0|5511	0.27561	5.12753	6.90261	0.00908909	0.0139394
ENSG00000101417.11|mRNA|PXMP4|ENSG00000101417.11|ENSG00000101417.11|0|5723	0.502135	1.94812	6.2693	0.0128632	0.0191746
ENSG00000101421.3|mRNA|CHMP4B|ENSG00000101421.3|ENSG00000101421.3|0|1646	0.27382	8.09656	9.65108	0.00209001	0.00362764
ENSG00000101425.12|mRNA|BPI|ENSG00000101425.12|ENSG00000101425.12|0|5626	-1.99843	4.05946	56.5851	7.6366e-13	9.74484e-12
ENSG00000101439.8|mRNA|CST3|ENSG00000101439.8|ENSG00000101439.8|0|3695	0.884481	7.99046	34.4661	1.24416e-08	5.66546e-08
ENSG00000101442.9|mRNA|ACTR5|ENSG00000101442.9|ENSG00000101442.9|0|2565	-0.713015	1.99961	9.1529	0.00271775	0.00461559
ENSG00000101444.12|mRNA|AHCY|ENSG00000101444.12|ENSG00000101444.12|0|3894	-1.43869	3.48835	58.3927	3.57041e-13	5.12315e-12
ENSG00000101445.9|mRNA|PPP1R16B|ENSG00000101445.9|ENSG00000101445.9|0|6400	-0.825078	4.78296	25.5951	7.70114e-07	2.53464e-06
ENSG00000101447.14|mRNA|FAM83D|ENSG00000101447.14|ENSG00000101447.14|0|2475	0.203058	3.14597	1.30196	0.254846	0.294764
ENSG00000101452.14|mRNA|DHX35|ENSG00000101452.14|ENSG00000101452.14|0|4930	-0.602036	2.42292	10.6504	0.00123927	0.00225205
ENSG00000101457.12|mRNA|DNTTIP1|ENSG00000101457.12|ENSG00000101457.12|0|1883	-0.459514	4.75746	20.3502	9.55485e-06	2.57843e-05
ENSG00000101460.12|mRNA|MAP1LC3A|ENSG00000101460.12|ENSG00000101460.12|0|1762	0.601673	3.69006	13.5285	0.000282493	0.000579962
ENSG00000101464.10|mRNA|PIGU|ENSG00000101464.10|ENSG00000101464.10|0|2705	0.10571	2.32106	0.38634	0.534743	0.578512
ENSG00000101470.9|mRNA|TNNC2|ENSG00000101470.9|ENSG00000101470.9|0|876	1.65029	6.33219	60.9355	1.23457e-13	2.06054e-12
ENSG00000101473.16|mRNA|ACOT8|ENSG00000101473.16|ENSG00000101473.16|0|4213	-0.059274	3.55162	0.22037	0.63913	0.677839
ENSG00000101474.11|mRNA|APMAP|ENSG00000101474.11|ENSG00000101474.11|0|2454	-0.0298166	3.04893	0.0388759	0.84384	0.867367
ENSG00000101493.10|mRNA|ZNF516|ENSG00000101493.10|ENSG00000101493.10|0|8217	-0.605322	2.13382	7.34989	0.0071279	0.0111468
ENSG00000101546.12|mRNA|RBFA|ENSG00000101546.12|ENSG00000101546.12|0|3722	-0.489256	2.68041	10.2268	0.00154557	0.00275876
ENSG00000101557.14|mRNA|USP14|ENSG00000101557.14|ENSG00000101557.14|0|5987	0.0149116	5.99119	0.0392095	0.84318	0.866734
ENSG00000101558.13|mRNA|VAPA|ENSG00000101558.13|ENSG00000101558.13|0|11880	0.951523	8.56069	49.5053	1.56852e-11	1.38406e-10
ENSG00000101574.14|mRNA|METTL4|ENSG00000101574.14|ENSG00000101574.14|0|5724	-0.0664525	2.90156	0.223853	0.636494	0.675475
ENSG00000101577.9|mRNA|LPIN2|ENSG00000101577.9|ENSG00000101577.9|0|6800	-0.13788	6.12027	2.25514	0.134317	0.164555
ENSG00000101596.14|mRNA|SMCHD1|ENSG00000101596.14|ENSG00000101596.14|0|12210	-0.388333	7.90291	16.3835	6.72656e-05	0.000155423
ENSG00000101605.12|mRNA|MYOM1|ENSG00000101605.12|ENSG00000101605.12|0|6574	1.43632	6.46691	54.397	1.92867e-12	2.21586e-11
ENSG00000101608.12|mRNA|MYL12A|ENSG00000101608.12|ENSG00000101608.12|0|3245	0.869309	11.7986	52.5228	4.28762e-12	4.47262e-11
ENSG00000101624.10|mRNA|CEP76|ENSG00000101624.10|ENSG00000101624.10|0|6158	-0.329661	2.63237	4.47862	0.035218	0.0482865
ENSG00000101639.18|mRNA|CEP192|ENSG00000101639.18|ENSG00000101639.18|0|9901	0.0697451	7.15664	0.636167	0.425789	0.470439
ENSG00000101654.17|mRNA|RNMT|ENSG00000101654.17|ENSG00000101654.17|0|6982	-0.582591	3.99631	15.5174	0.000103651	0.000231502
ENSG00000101695.8|mRNA|RNF125|ENSG00000101695.8|ENSG00000101695.8|0|6508	-0.710369	4.09165	33.9853	1.54985e-08	6.93091e-08
ENSG00000101745.16|mRNA|ANKRD12|ENSG00000101745.16|ENSG00000101745.16|0|12252	0.890626	10.222	46.5361	5.69488e-11	4.37031e-10
ENSG00000101751.10|mRNA|POLI|ENSG00000101751.10|ENSG00000101751.10|0|9471	0.677483	6.11179	26.1358	5.96187e-07	2.0005e-06
ENSG00000101752.11|mRNA|MIB1|ENSG00000101752.11|ENSG00000101752.11|0|10033	-0.00316559	6.47954	0.00130316	0.971229	0.976763
ENSG00000101773.18|mRNA|RBBP8|ENSG00000101773.18|ENSG00000101773.18|0|5091	0.0389802	6.21442	0.233891	0.629038	0.668736
ENSG00000101782.14|mRNA|RIOK3|ENSG00000101782.14|ENSG00000101782.14|0|5320	1.08182	10.3378	55.7326	1.09476e-12	1.34701e-11
ENSG00000101811.13|mRNA|CSTF2|ENSG00000101811.13|ENSG00000101811.13|0|2187	-0.917584	3.02684	30.5421	7.5705e-08	2.97935e-07
ENSG00000101843.18|mRNA|PSMD10|ENSG00000101843.18|ENSG00000101843.18|0|2459	-0.733943	3.22628	27.6249	2.95505e-07	1.04482e-06
ENSG00000101844.17|mRNA|ATG4A|ENSG00000101844.17|ENSG00000101844.17|0|2927	-0.399904	3.44493	9.24466	0.00258912	0.00441483
ENSG00000101846.6|mRNA|STS|ENSG00000101846.6|ENSG00000101846.6|0|6521	-0.23217	2.16396	1.53147	0.216946	0.255159
ENSG00000101849.15|mRNA|TBL1X|ENSG00000101849.15|ENSG00000101849.15|0|7009	-0.643225	4.54708	21.3724	5.81846e-06	1.6345e-05
ENSG00000101856.9|mRNA|PGRMC1|ENSG00000101856.9|ENSG00000101856.9|0|1919	1.74913	9.7621	67.4639	8.40309e-15	1.92422e-13
ENSG00000101868.10|mRNA|POLA1|ENSG00000101868.10|ENSG00000101868.10|0|6336	0.335537	5.56513	13.3036	0.000316699	0.000644087
ENSG00000101882.9|mRNA|NKAP|ENSG00000101882.9|ENSG00000101882.9|0|7894	-0.926186	5.14996	72.5672	1.06802e-15	3.04309e-14
ENSG00000101888.11|mRNA|NXT2|ENSG00000101888.11|ENSG00000101888.11|0|3064	1.09578	4.0395	43.659	2.01249e-10	1.34334e-09
ENSG00000101901.11|mRNA|ALG13|ENSG00000101901.11|ENSG00000101901.11|0|8188	0.201923	5.06549	3.10849	0.0789933	0.101211
ENSG00000101911.12|mRNA|PRPS2|ENSG00000101911.12|ENSG00000101911.12|0|2758	-0.832055	4.95665	65.1571	2.15804e-14	4.34768e-13
ENSG00000101928.12|mRNA|MOSPD1|ENSG00000101928.12|ENSG00000101928.12|0|2675	-0.762571	3.20139	20.7914	7.71095e-06	2.11839e-05
ENSG00000101935.9|mRNA|AMMECR1|ENSG00000101935.9|ENSG00000101935.9|0|6516	0.0979592	2.68402	0.419899	0.597382	0.637973
ENSG00000101940.17|mRNA|WDR13|ENSG00000101940.17|ENSG00000101940.17|0|7884	0.570964	4.61642	17.0498	4.83109e-05	0.000114819
ENSG00000101945.16|mRNA|SUV39H1|ENSG00000101945.16|ENSG00000101945.16|0|3368	-0.523195	2.19802	9.53312	0.0022238	0.00383916
ENSG00000101966.12|mRNA|XIAP|ENSG00000101966.12|ENSG00000101966.12|0|9025	-0.123493	4.58135	1.39936	0.237851	0.277304
ENSG00000101972.18|mRNA|STAG2|ENSG00000101972.18|ENSG00000101972.18|0|8187	0.233139	8.63181	5.8848	0.0159145	0.0232947
ENSG00000101974.14|mRNA|ATP11C|ENSG00000101974.14|ENSG00000101974.14|0|7407	0.562624	5.09156	23.4492	2.141e-06	6.47691e-06
ENSG00000101986.11|mRNA|ABCD1|ENSG00000101986.11|ENSG00000101986.11|0|4233	0.53065	2.82901	8.42039	0.00400998	0.00657668
ENSG00000101997.12|mRNA|CCDC22|ENSG00000101997.12|ENSG00000101997.12|0|2516	-0.965765	3.45387	30.2667	8.60308e-08	3.35938e-07
ENSG00000102007.10|mRNA|PLP2|ENSG00000102007.10|ENSG00000102007.10|0|1279	-0.919834	5.87348	45.6444	8.41011e-11	6.18737e-10
ENSG00000102010.14|mRNA|BMX|ENSG00000102010.14|ENSG00000102010.14|0|2806	-1.47505	2.12235	36.4206	5.11449e-09	2.52434e-08
ENSG00000102024.17|mRNA|PLS3|ENSG00000102024.17|ENSG00000102024.17|0|4099	-0.0553456	5.7392	0.243843	0.621837	0.661852
ENSG00000102030.15|mRNA|NAA10|ENSG00000102030.15|ENSG00000102030.15|0|4742	-1.09785	4.82205	114.257	1.54344e-22	1.91205e-20
ENSG00000102032.12|mRNA|RENBP|ENSG00000102032.12|ENSG00000102032.12|0|2057	-0.258492	3.50859	3.44196	0.0646282	0.0842655
ENSG00000102034.16|mRNA|ELF4|ENSG00000102034.16|ENSG00000102034.16|0|4316	-1.02626	4.58264	46.8387	4.99054e-11	3.8851e-10
ENSG00000102038.15|mRNA|SMARCA1|ENSG00000102038.15|ENSG00000102038.15|0|4363	-0.676428	2.78121	14.124	0.000208927	0.000440491
ENSG00000102043.15|mRNA|MTMR8|ENSG00000102043.15|ENSG00000102043.15|0|2782	-0.604715	1.95884	12.9541	0.000378393	0.000759184
ENSG00000102053.12|mRNA|ZC3H12B|ENSG00000102053.12|ENSG00000102053.12|0|7829	1.08784	3.31929	29.6597	1.14092e-07	4.35432e-07
ENSG00000102054.17|mRNA|RBBP7|ENSG00000102054.17|ENSG00000102054.17|0|7392	0.0693648	5.99297	0.646165	0.42218	0.466917
ENSG00000102081.13|mRNA|FMR1|ENSG00000102081.13|ENSG00000102081.13|0|8827	-0.0423497	6.63375	0.276059	0.599719	0.639886
ENSG00000102096.9|mRNA|PIM2|ENSG00000102096.9|ENSG00000102096.9|0|2761	-1.03429	3.64503	34.6418	1.14826e-08	5.27331e-08
ENSG00000102098.17|mRNA|SCML2|ENSG00000102098.17|ENSG00000102098.17|0|4203	0.386005	2.07996	3.08104	0.080321	0.102778
ENSG00000102100.15|mRNA|SLC35A2|ENSG00000102100.15|ENSG00000102100.15|0|3745	0.615966	1.80632	8.25235	0.00438645	0.00713719
ENSG00000102103.15|mRNA|PQBP1|ENSG00000102103.15|ENSG00000102103.15|0|1903	-1.47577	4.93945	136.667	6.57198e-26	1.24836e-23
ENSG00000102119.10|mRNA|EMD|ENSG00000102119.10|ENSG00000102119.10|0|2020	1.06863	6.52758	53.9658	2.31673e-12	2.59075e-11
ENSG00000102125.15|mRNA|TAZ|ENSG00000102125.15|ENSG00000102125.15|0|4721	-0.723793	2.34352	12.1919	0.000558822	0.00108326
ENSG00000102144.13|mRNA|PGK1|ENSG00000102144.13|ENSG00000102144.13|0|5415	0.0758919	7.31429	0.793131	0.373932	0.418124
ENSG00000102145.13|mRNA|GATA1|ENSG00000102145.13|ENSG00000102145.13|0|1500	0.700823	4.75624	23.1699	2.44765e-06	7.32459e-06
ENSG00000102158.19|mRNA|MAGT1|ENSG00000102158.19|ENSG00000102158.19|0|4862	0.787528	4.14768	35.9503	6.33049e-09	3.06015e-08
ENSG00000102172.15|mRNA|SMS|ENSG00000102172.15|ENSG00000102172.15|0|2160	0.751459	7.88124	45.1105	1.06279e-10	7.58401e-10
ENSG00000102174.8|mRNA|PHEX|ENSG00000102174.8|ENSG00000102174.8|0|6384	1.11203	3.1186	17.0625	4.8008e-05	0.000114167
ENSG00000102178.12|mRNA|UBL4A|ENSG00000102178.12|ENSG00000102178.12|0|2630	1.39091	5.55231	57.5731	5.0371e-13	6.853e-12
ENSG00000102181.20|mRNA|CD99L2|ENSG00000102181.20|ENSG00000102181.20|0|5762	0.520935	5.904	20.1275	1.06491e-05	2.8502e-05
ENSG00000102189.16|mRNA|EEA1|ENSG00000102189.16|ENSG00000102189.16|0|10150	0.526612	6.90728	33.0287	2.40269e-08	1.03637e-07
ENSG00000102218.5|mRNA|RP2|ENSG00000102218.5|ENSG00000102218.5|0|3803	0.107152	3.88289	0.610641	0.435217	0.480217
ENSG00000102221.13|mRNA|JADE3|ENSG00000102221.13|ENSG00000102221.13|0|5137	-0.278628	2.90005	3.4332	0.0649672	0.0846743
ENSG00000102225.15|mRNA|CDK16|ENSG00000102225.15|ENSG00000102225.15|0|6524	0.589294	5.32728	26.1032	6.05432e-07	2.02913e-06
ENSG00000102226.9|mRNA|USP11|ENSG00000102226.9|ENSG00000102226.9|0|5269	-0.260964	5.59122	7.61272	0.00618405	0.00977965
ENSG00000102230.13|mRNA|PCYT1B|ENSG00000102230.13|ENSG00000102230.13|0|5555	1.58135	7.47341	49.23	1.7667e-11	1.5394e-10
ENSG00000102241.11|mRNA|HTATSF1|ENSG00000102241.11|ENSG00000102241.11|0|3136	-1.1657	5.09394	82.6579	1.98352e-17	9.09457e-16
ENSG00000102245.7|mRNA|CD40LG|ENSG00000102245.7|ENSG00000102245.7|0|1817	1.00062	4.67855	35.2281	8.79029e-09	4.13399e-08
ENSG00000102265.11|mRNA|TIMP1|ENSG00000102265.11|ENSG00000102265.11|0|1541	1.3388	9.5304	54.2376	2.06384e-12	2.34415e-11
ENSG00000102309.12|mRNA|PIN4|ENSG00000102309.12|ENSG00000102309.12|0|4011	-0.0658916	5.20536	0.292724	0.588917	0.63008
ENSG00000102316.16|mRNA|MAGED2|ENSG00000102316.16|ENSG00000102316.16|0|2940	0.838939	6.63436	37.2035	3.58905e-09	1.82611e-08
ENSG00000102317.17|mRNA|RBM3|ENSG00000102317.17|ENSG00000102317.17|0|3731	-1.39296	5.87264	128.459	1.0718e-24	1.75221e-22
ENSG00000102362.15|mRNA|SYTL4|ENSG00000102362.15|ENSG00000102362.15|0|7428	1.57142	7.65275	51.8616	5.69036e-12	5.73493e-11
ENSG00000102383.13|mRNA|ZDHHC15|ENSG00000102383.13|ENSG00000102383.13|0|6820	0.814694	3.25522	15.8473	8.78887e-05	0.000198364
ENSG00000102384.13|mRNA|CENPI|ENSG00000102384.13|ENSG00000102384.13|0|4321	0.855115	4.21729	23.88	1.7423e-06	5.35523e-06
ENSG00000102390.10|mRNA|PBDC1|ENSG00000102390.10|ENSG00000102390.10|0|1201	-0.897434	4.68561	33.6863	1.77718e-08	7.84894e-08
ENSG00000102393.9|mRNA|GLA|ENSG00000102393.9|ENSG00000102393.9|0|2065	1.35648	6.31129	40.7459	7.32271e-10	4.30703e-09
ENSG00000102401.19|mRNA|ARMCX3|ENSG00000102401.19|ENSG00000102401.19|0|4239	1.40615	7.22238	90.7628	8.7838e-19	5.44077e-17
ENSG00000102409.9|mRNA|BEX4|ENSG00000102409.9|ENSG00000102409.9|0|1328	1.06039	6.59809	60.2093	1.67049e-13	2.6697e-12
ENSG00000102445.18|mRNA|RUBCNL|ENSG00000102445.18|ENSG00000102445.18|0|6105	-0.278227	4.2574	1.39172	0.239132	0.278624
ENSG00000102524.11|mRNA|TNFSF13B|ENSG00000102524.11|ENSG00000102524.11|0|3059	0.118507	5.1134	1.13465	0.287718	0.329253
ENSG00000102531.16|mRNA|FNDC3A|ENSG00000102531.16|ENSG00000102531.16|0|7698	0.31712	6.71786	14.2945	0.000191678	0.000406487
ENSG00000102543.14|mRNA|CDADC1|ENSG00000102543.14|ENSG00000102543.14|0|3863	-0.784996	2.31333	16.9854	4.98786e-05	0.000118207
ENSG00000102547.18|mRNA|CAB39L|ENSG00000102547.18|ENSG00000102547.18|0|5006	-0.318827	2.66661	4.19983	0.0413748	0.055989
ENSG00000102572.14|mRNA|STK24|ENSG00000102572.14|ENSG00000102572.14|0|12077	0.918919	8.91804	54.0371	2.2475e-12	2.52117e-11
ENSG00000102575.10|mRNA|ACP5|ENSG00000102575.10|ENSG00000102575.10|0|2814	-0.434082	2.36883	2.94448	0.0872956	0.110934
ENSG00000102580.14|mRNA|DNAJC3|ENSG00000102580.14|ENSG00000102580.14|0|5591	1.13454	8.55286	56.2522	8.7889e-13	1.10666e-11
ENSG00000102595.19|mRNA|UGGT2|ENSG00000102595.19|ENSG00000102595.19|0|8105	0.992301	6.02299	50.4672	1.03585e-11	9.64968e-11
ENSG00000102606.17|mRNA|ARHGEF7|ENSG00000102606.17|ENSG00000102606.17|0|11768	0.115849	5.69446	1.53636	0.216216	0.25439
ENSG00000102699.5|mRNA|PARP4|ENSG00000102699.5|ENSG00000102699.5|0|6080	-0.478831	6.93843	23.7232	1.87787e-06	5.74186e-06
ENSG00000102710.19|mRNA|SUPT20H|ENSG00000102710.19|ENSG00000102710.19|0|10933	-0.124313	6.11266	2.02734	0.155623	0.188332
ENSG00000102738.7|mRNA|MRPS31|ENSG00000102738.7|ENSG00000102738.7|0|2124	-0.627001	4.31068	29.1967	1.41567e-07	5.29948e-07
ENSG00000102743.14|mRNA|SLC25A15|ENSG00000102743.14|ENSG00000102743.14|0|1837	0.641455	3.65096	15.4451	0.000107475	0.00023932
ENSG00000102753.9|mRNA|KPNA3|ENSG00000102753.9|ENSG00000102753.9|0|4474	0.738828	7.17357	44.7071	1.26872e-10	8.90066e-10
ENSG00000102755.11|mRNA|FLT1|ENSG00000102755.11|ENSG00000102755.11|0|12567	-0.265302	3.78445	3.93548	0.04827	0.0645055
ENSG00000102760.12|mRNA|RGCC|ENSG00000102760.12|ENSG00000102760.12|0|1032	0.156836	5.8909	2.07913	0.150461	0.18255
ENSG00000102763.17|mRNA|VWA8|ENSG00000102763.17|ENSG00000102763.17|0|7633	0.877206	6.71885	40.2326	9.20699e-10	5.26321e-09
ENSG00000102780.16|mRNA|DGKH|ENSG00000102780.16|ENSG00000102780.16|0|19637	1.27671	5.14332	50.7238	9.27551e-12	8.7906e-11
ENSG00000102781.13|mRNA|KATNAL1|ENSG00000102781.13|ENSG00000102781.13|0|8105	0.908613	6.55213	49.602	1.50435e-11	1.33531e-10
ENSG00000102786.14|mRNA|INTS6|ENSG00000102786.14|ENSG00000102786.14|0|25509	0.18988	5.80895	4.84076	0.0286246	0.0398769
ENSG00000102796.10|mRNA|DHRS12|ENSG00000102796.10|ENSG00000102796.10|0|3525	-0.707869	2.93229	17.0537	4.82179e-05	0.000114625
ENSG00000102804.14|mRNA|TSC22D1|ENSG00000102804.14|ENSG00000102804.14|0|8586	1.40756	9.70318	47.4512	3.82193e-11	3.04426e-10
ENSG00000102858.12|mRNA|MGRN1|ENSG00000102858.12|ENSG00000102858.12|0|10219	0.0575823	5.34439	0.317616	0.573502	0.615569
ENSG00000102871.15|mRNA|TRADD|ENSG00000102871.15|ENSG00000102871.15|0|2567	-0.892835	2.50871	20.1705	1.04282e-05	2.79406e-05
ENSG00000102879.15|mRNA|CORO1A|ENSG00000102879.15|ENSG00000102879.15|0|4871	-1.38609	7.74688	111.938	3.53651e-22	4.1249e-20
ENSG00000102882.11|mRNA|MAPK3|ENSG00000102882.11|ENSG00000102882.11|0|3669	-0.346998	5.42038	11.4963	0.000799399	0.00150146
ENSG00000102893.15|mRNA|PHKB|ENSG00000102893.15|ENSG00000102893.15|0|11822	1.18397	9.21404	50.1088	1.20885e-11	1.10447e-10
ENSG00000102897.9|mRNA|LYRM1|ENSG00000102897.9|ENSG00000102897.9|0|3593	0.443323	5.31415	14.5364	0.000169666	0.000364221
ENSG00000102898.11|mRNA|NUTF2|ENSG00000102898.11|ENSG00000102898.11|0|3895	1.15971	8.30918	68.9801	4.53733e-15	1.12279e-13
ENSG00000102900.12|mRNA|NUP93|ENSG00000102900.12|ENSG00000102900.12|0|11136	-0.883774	4.37306	55.1172	1.4207e-12	1.69981e-11
ENSG00000102901.12|mRNA|CENPT|ENSG00000102901.12|ENSG00000102901.12|0|5539	1.12947	6.19131	57.3615	5.50614e-13	7.39e-12
ENSG00000102904.14|mRNA|TSNAXIP1|ENSG00000102904.14|ENSG00000102904.14|0|3852	1.08727	3.08771	25.0137	1.01491e-06	3.26333e-06
ENSG00000102908.20|mRNA|NFAT5|ENSG00000102908.20|ENSG00000102908.20|0|16401	1.12246	7.07097	54.1909	2.10521e-12	2.38029e-11
ENSG00000102910.13|mRNA|LONP2|ENSG00000102910.13|ENSG00000102910.13|0|9957	-0.158843	5.10832	2.86999	0.0913751	0.115647
ENSG00000102921.7|mRNA|N4BP1|ENSG00000102921.7|ENSG00000102921.7|0|7839	-0.656916	3.39188	18.9537	1.88985e-05	4.84361e-05
ENSG00000102931.7|mRNA|ARL2BP|ENSG00000102931.7|ENSG00000102931.7|0|2155	-0.922542	4.52097	58.0017	4.20708e-13	5.85147e-12
ENSG00000102935.11|mRNA|ZNF423|ENSG00000102935.11|ENSG00000102935.11|0|8997	-1.80288	2.03009	66.675	1.1593e-14	2.54091e-13
ENSG00000102974.14|mRNA|CTCF|ENSG00000102974.14|ENSG00000102974.14|0|4301	0.584904	7.27375	32.1996	3.51827e-08	1.46865e-07
ENSG00000102977.13|mRNA|ACD|ENSG00000102977.13|ENSG00000102977.13|0|3223	-0.153081	3.79905	1.57472	0.210587	0.248456
ENSG00000102978.12|mRNA|POLR2C|ENSG00000102978.12|ENSG00000102978.12|0|3940	-1.17131	3.93059	77.863	1.29879e-16	4.84195e-15
ENSG00000102981.9|mRNA|PARD6A|ENSG00000102981.9|ENSG00000102981.9|0|1488	0.0849153	1.96588	0.180203	0.67153	0.70896
ENSG00000102984.14|mRNA|ZNF821|ENSG00000102984.14|ENSG00000102984.14|0|3402	0.216957	2.25754	1.3776	0.241523	0.281147
ENSG00000103005.11|mRNA|USB1|ENSG00000103005.11|ENSG00000103005.11|0|8265	-0.910885	3.70058	46.2824	6.36216e-11	4.82301e-10
ENSG00000103018.16|mRNA|CYB5B|ENSG00000103018.16|ENSG00000103018.16|0|6903	-0.872771	3.26979	42.3075	3.65791e-10	2.30221e-09
ENSG00000103035.10|mRNA|PSMD7|ENSG00000103035.10|ENSG00000103035.10|0|2740	-1.05541	5.96799	107.403	1.81704e-21	1.88755e-19
ENSG00000103037.11|mRNA|SETD6|ENSG00000103037.11|ENSG00000103037.11|0|5078	-0.890178	1.81227	14.9596	0.000137113	0.00029963
ENSG00000103043.14|mRNA|VAC14|ENSG00000103043.14|ENSG00000103043.14|0|8276	-0.594862	3.84837	18.1737	2.77247e-05	6.87943e-05
ENSG00000103047.7|mRNA|TANGO6|ENSG00000103047.7|ENSG00000103047.7|0|6839	-0.68365	3.43915	17.6575	3.57641e-05	8.69896e-05
ENSG00000103051.18|mRNA|COG4|ENSG00000103051.18|ENSG00000103051.18|0|4786	-0.607474	3.73627	17.3266	4.21213e-05	0.000101218
ENSG00000103056.11|mRNA|SMPD3|ENSG00000103056.11|ENSG00000103056.11|0|7166	0.567719	2.58611	2.1709	0.141785	0.172897
ENSG00000103061.12|mRNA|SLC7A6OS|ENSG00000103061.12|ENSG00000103061.12|0|5229	-0.911213	2.89003	31.6975	4.4351e-08	1.822e-07
ENSG00000103064.13|mRNA|SLC7A6|ENSG00000103064.13|ENSG00000103064.13|0|7588	0.431259	2.89944	2.5877	0.108842	0.135839
ENSG00000103066.12|mRNA|PLA2G15|ENSG00000103066.12|ENSG00000103066.12|0|4464	0.315529	1.80574	2.0084	0.157559	0.190548
ENSG00000103091.14|mRNA|WDR59|ENSG00000103091.14|ENSG00000103091.14|0|9422	-0.222692	3.76592	3.11369	0.0787446	0.100949
ENSG00000103111.14|mRNA|MON1B|ENSG00000103111.14|ENSG00000103111.14|0|6942	-0.0377364	3.74094	0.0313795	0.859526	0.881401
ENSG00000103121.8|mRNA|CMC2|ENSG00000103121.8|ENSG00000103121.8|0|12781	0.999393	6.19085	40.6295	7.71276e-10	4.50457e-09
ENSG00000103126.14|mRNA|AXIN1|ENSG00000103126.14|ENSG00000103126.14|0|7487	-0.0174703	5.45577	0.0266732	0.870387	0.891163
ENSG00000103145.10|mRNA|HCFC1R1|ENSG00000103145.10|ENSG00000103145.10|0|1433	-0.129389	3.83317	0.852192	0.356741	0.40054
ENSG00000103148.15|mRNA|NPRL3|ENSG00000103148.15|ENSG00000103148.15|0|6609	0.770389	7.4638	40.7117	7.43506e-10	4.3641e-09
ENSG00000103150.5|mRNA|MLYCD|ENSG00000103150.5|ENSG00000103150.5|0|16161	-0.0612433	3.77703	0.256393	0.649373	0.687569
ENSG00000103152.11|mRNA|MPG|ENSG00000103152.11|ENSG00000103152.11|0|1661	-0.870953	3.22274	28.1275	2.33413e-07	8.40785e-07
ENSG00000103160.11|mRNA|HSDL1|ENSG00000103160.11|ENSG00000103160.11|0|4507	1.44318	4.94769	67.2613	9.12616e-15	2.07078e-13
ENSG00000103168.16|mRNA|TAF1C|ENSG00000103168.16|ENSG00000103168.16|0|5577	0.136937	1.96509	0.251452	0.616455	0.656549
ENSG00000103174.11|mRNA|NAGPA|ENSG00000103174.11|ENSG00000103174.11|0|5484	-0.326884	1.94473	1.80363	0.180379	0.215765
ENSG00000103175.10|mRNA|WFDC1|ENSG00000103175.10|ENSG00000103175.10|0|8785	0.779305	2.36259	12.7431	0.000421435	0.000837955
ENSG00000103184.11|mRNA|SEC14L5|ENSG00000103184.11|ENSG00000103184.11|0|6477	1.74524	5.85895	51.9489	5.48144e-12	5.54961e-11
ENSG00000103187.7|mRNA|COTL1|ENSG00000103187.7|ENSG00000103187.7|0|6762	-0.291603	9.65533	10.1513	0.00160785	0.00285808
ENSG00000103194.15|mRNA|USP10|ENSG00000103194.15|ENSG00000103194.15|0|5083	1.00966	7.57279	45.9836	7.24993e-11	5.41167e-10
ENSG00000103197.16|mRNA|TSC2|ENSG00000103197.16|ENSG00000103197.16|0|11121	-0.550995	4.7943	16.2271	7.27173e-05	0.000167071
ENSG00000103202.12|mRNA|NME4|ENSG00000103202.12|ENSG00000103202.12|0|3670	0.164675	5.97048	1.30863	0.253635	0.293551
ENSG00000103222.18|mRNA|ABCC1|ENSG00000103222.18|ENSG00000103222.18|0|7575	0.815535	6.32299	41.9801	4.22938e-10	2.6287e-09
ENSG00000103226.17|mRNA|NOMO3|ENSG00000103226.17|ENSG00000103226.17|0|8274	1.22985	6.35292	39.7323	1.15148e-09	6.4512e-09
ENSG00000103227.18|mRNA|LMF1|ENSG00000103227.18|ENSG00000103227.18|0|8233	0.15031	1.62715	0.260898	0.609913	0.650067
ENSG00000103245.13|mRNA|NARFL|ENSG00000103245.13|ENSG00000103245.13|0|8101	-0.779667	2.27041	12.2447	0.000543894	0.00105617
ENSG00000103248.18|mRNA|MTHFSD|ENSG00000103248.18|ENSG00000103248.18|0|6863	-0.667619	2.13527	11.4892	0.000802327	0.00150611
ENSG00000103249.17|mRNA|CLCN7|ENSG00000103249.17|ENSG00000103249.17|0|8119	0.44335	3.49827	4.6542	0.0318421	0.0439997
ENSG00000103254.9|mRNA|FAM173A|ENSG00000103254.9|ENSG00000103254.9|0|1923	-1.19344	1.7434	23.861	1.75812e-06	5.39972e-06
ENSG00000103257.8|mRNA|SLC7A5|ENSG00000103257.8|ENSG00000103257.8|0|4745	-0.332695	3.96675	2.59247	0.108518	0.13546
ENSG00000103264.17|mRNA|FBXO31|ENSG00000103264.17|ENSG00000103264.17|0|6897	-0.519217	2.16936	6.38835	0.0120466	0.0180424
ENSG00000103266.10|mRNA|STUB1|ENSG00000103266.10|ENSG00000103266.10|0|2316	-0.242131	5.34611	5.17646	0.0236632	0.033501
ENSG00000103274.10|mRNA|NUBP1|ENSG00000103274.10|ENSG00000103274.10|0|1955	-1.15713	4.45568	65.818	1.6459e-14	3.45916e-13
ENSG00000103275.19|mRNA|UBE2I|ENSG00000103275.19|ENSG00000103275.19|0|9679	-0.407562	6.44367	23.4974	2.09217e-06	6.33785e-06
ENSG00000103313.12|mRNA|MEFV|ENSG00000103313.12|ENSG00000103313.12|0|4819	-0.709916	4.56801	20.8978	7.32306e-06	2.01822e-05
ENSG00000103316.10|mRNA|CRYM|ENSG00000103316.10|ENSG00000103316.10|0|3782	1.27284	2.87479	27.343	3.3737e-07	1.18382e-06
ENSG00000103319.11|mRNA|EEF2K|ENSG00000103319.11|ENSG00000103319.11|0|8020	-0.0520441	3.87377	0.0803725	0.777006	0.806987
ENSG00000103326.11|mRNA|CAPN15|ENSG00000103326.11|ENSG00000103326.11|0|7987	-0.26848	3.09228	1.19647	0.274984	0.316036
ENSG00000103335.21|mRNA|PIEZO1|ENSG00000103335.21|ENSG00000103335.21|0|10855	0.0448303	4.28998	0.032814	0.856386	0.878632
ENSG00000103342.12|mRNA|GSPT1|ENSG00000103342.12|ENSG00000103342.12|0|8018	-0.460062	7.63973	16.7077	5.72519e-05	0.000134135
ENSG00000103351.12|mRNA|CLUAP1|ENSG00000103351.12|ENSG00000103351.12|0|7798	-0.167496	4.49658	2.09941	0.148493	0.180371
ENSG00000103353.15|mRNA|UBFD1|ENSG00000103353.15|ENSG00000103353.15|0|8619	-0.759571	3.11573	19.6642	1.33488e-05	3.51288e-05
ENSG00000103356.15|mRNA|EARS2|ENSG00000103356.15|ENSG00000103356.15|0|5730	-0.892042	1.96721	17.865	3.22821e-05	7.91088e-05
ENSG00000103363.14|mRNA|ELOB|ENSG00000103363.14|ENSG00000103363.14|0|1128	-0.709137	7.04198	62.1341	7.50624e-14	1.31442e-12
ENSG00000103365.15|mRNA|GGA2|ENSG00000103365.15|ENSG00000103365.15|0|8231	-0.514033	5.77764	11.4679	0.000811227	0.00152124
ENSG00000103381.11|mRNA|CPPED1|ENSG00000103381.11|ENSG00000103381.11|0|6484	-1.11636	4.74947	56.4871	7.95924e-13	1.00955e-11
ENSG00000103404.14|mRNA|USP31|ENSG00000103404.14|ENSG00000103404.14|0|12017	1.09126	5.68095	41.3205	5.6696e-10	3.41426e-09
ENSG00000103415.11|mRNA|HMOX2|ENSG00000103415.11|ENSG00000103415.11|0|3793	-1.38027	4.63227	88.6936	1.93329e-18	1.11252e-16
ENSG00000103423.13|mRNA|DNAJA3|ENSG00000103423.13|ENSG00000103423.13|0|7071	-1.08869	3.55364	48.8973	2.04025e-11	1.74797e-10
ENSG00000103426.12|mRNA|CORO7-PAM16|ENSG00000103426.12|ENSG00000103426.12|0|3815	-0.746845	4.90047	21.0237	6.88908e-06	1.9089e-05
ENSG00000103429.10|mRNA|BFAR|ENSG00000103429.10|ENSG00000103429.10|0|4401	-0.270091	3.57537	5.43459	0.020463	0.0293475
[truncated: 17,946 more rows]

## Sheet: kraken2 cancer vs. HD
genus id	logFC	logCPM	F	PValue	FDR
157226|Jeotgalibacillus	-5.45613	13.6718	156.853	9.84687e-29	7.74949e-26
54304|Planktothrix	-3.13691	11.6031	111.657	4.21926e-22	1.66028e-19
1055323|Aeribacillus	-3.05518	11.2513	98.9547	4.30316e-20	1.12886e-17
1906945|Parageobacillus	-2.61532	10.4674	86.1852	5.32055e-18	1.04682e-15
380738|Candidatus Kuenenia	-2.53064	9.40665	74.7502	4.64121e-16	7.30526e-14
1649|Kurthia	-2.22127	9.31485	63.6922	4.06174e-14	5.32764e-12
10375|Lymphocryptovirus	5.4315	6.33632	58.9372	2.91726e-13	3.27983e-11
687332|Betatorquevirus	6.79629	10.6016	56.046	9.82099e-13	9.6614e-11
687331|Alphatorquevirus	7.02395	13.656	52.563	4.30585e-12	3.76522e-10
1218|Prochlorococcus	-2.38406	11.4254	51.7961	5.97599e-12	4.7031e-10
687333|Gammatorquevirus	5.70132	9.22873	49.9074	1.34457e-11	9.61977e-10
40272|Roseolovirus	6.19984	9.55576	46.8075	5.14819e-11	3.24402e-09
10509|Mastadenovirus	4.74963	6.76466	46.7155	5.35862e-11	3.24402e-09
153135|Gammaretrovirus	4.13841	6.61083	44.6896	1.29925e-10	7.30366e-09
538|Eikenella	-1.53731	9.97402	43.5692	2.12627e-10	1.11558e-08
140052|Betaretrovirus	4.79484	11.4776	43.125	2.58627e-10	1.27212e-08
91914|Asaia	-1.89271	8.11886	41.3939	5.56518e-10	2.57635e-08
46254|Oenococcus	-1.48191	8.86309	40.8722	7.0176e-10	3.06825e-08
1729679|Faecalibaculum	-1.7074	8.63376	40.4279	8.55277e-10	3.54265e-08
390846|Echinicola	-1.55462	10.1532	37.5584	3.09414e-09	1.21754e-07
1107|Chloroflexus	-1.46335	10.5223	35.866	6.64923e-09	2.49188e-07
64895|Borreliella	2.16552	8.34269	31.0998	5.89605e-08	2.10918e-06
1906660|Candidatus Mikella	3.5058	10.6951	30.8557	6.60071e-08	2.25859e-06
1918540|Muribaculum	-1.59251	9.48187	29.9786	9.9133e-08	3.25074e-06
529883|Rhodoluna	1.35089	12.4371	29.4045	1.29475e-07	3.94868e-06
1193324|Alkalitalea	2.78623	10.345	29.3884	1.30452e-07	3.94868e-06
630749|Spongiibacter	2.39343	8.50356	28.8485	1.67795e-07	4.8909e-06
11646|Lentivirus	2.89008	5.29948	28.0839	2.39905e-07	6.74306e-06
2093|Mycoplasma	2.42711	16.0468	27.8827	2.63629e-07	6.93022e-06
265570|Sulfurovum	2.53874	8.68476	27.8783	2.64176e-07	6.93022e-06
875170|Celeribacter	-1.30381	11.4715	26.4778	5.10397e-07	1.26927e-05
2732587|Candidatus Vesicomyosocius	2.81768	8.25612	26.4543	5.16093e-07	1.26927e-05
390805|Geosporobacter	-1.56338	7.72141	26.258	5.66206e-07	1.35032e-05
11019|Alphavirus	2.38592	4.55769	25.5261	8.00444e-07	1.85279e-05
191303|Turicibacter	-1.50664	11.9996	24.0239	1.63513e-06	3.6767e-05
2211641|Yoonia	-1.3344	10.3799	23.9313	1.70899e-06	3.73603e-05
2732977|Citexvirus	1.64332	4.14318	23.7528	1.86107e-06	3.95854e-05
2321111|Aliiarcobacter	2.36308	7.00183	22.5983	3.23612e-06	6.70217e-05
1331737|Haloactinobacterium	1.07175	10.524	22.2453	3.83494e-06	7.73871e-05
47251|Leptolyngbya	-1.37427	12.303	22.1467	4.02138e-06	7.91206e-05
1051|Ectothiorhodospira	1.83785	9.78859	22.0855	4.14173e-06	7.9501e-05
156973|Dysgonomonas	-1.31388	10.4172	21.4428	5.64778e-06	0.000105829
673534|Plantactinospora	1.96693	11.4373	21.1687	6.44863e-06	0.000118025
1231242|Ferrovibrio	1.60585	12.6568	19.1778	1.69926e-05	0.000303937
1632780|Phreatobacter	1.17636	14.3283	18.9329	1.91571e-05	0.000335036
1518149|Thalassotalea	-1.19552	7.97223	18.8553	1.98997e-05	0.000340459
2202|Methanospirillum	1.91803	6.23958	18.5806	2.27712e-05	0.000381296
18|Pelobacter	1.4705	11.3283	18.3947	2.4948e-05	0.000409044
254245|Aquicella	1.47023	10.1486	18.3418	2.56055e-05	0.000411256
2078948|Epidermidibacterium	-1.05977	11.3598	18.2162	2.72377e-05	0.000428722
444051|Mesoflavibacter	1.85561	6.9441	18.0532	2.95137e-05	0.000455436
1295327|Croceicoccus	-0.760269	9.54126	17.1723	4.55965e-05	0.000690085
1849|Actinopolyspora	-1.34422	12.8263	16.7505	5.61996e-05	0.000834511
67572|Psychromonas	-1.41185	9.2153	16.6111	6.02275e-05	0.000875566
238749|Diaphorobacter	0.755307	10.78	16.5792	6.11895e-05	0.000875566
1602345|Parasaccharibacter	-1.2144	6.82098	16.5309	6.26777e-05	0.000880845
68|Lysobacter	-0.558016	13.1635	16.3761	6.76924e-05	0.00093463
2042066|Paraphotobacterium	-1.14203	5.82519	16.3389	6.89563e-05	0.000935665
232523|Hylemonella	1.14752	10.355	16.0997	7.76839e-05	0.00103622
202746|Sulfurimonas	1.94094	10.6687	15.9819	8.2381e-05	0.00106319
65496|Actinoalloteichus	-0.883761	10.7919	15.9681	8.2953e-05	0.00106319
316625|Saccharophagus	1.80833	8.57847	15.9487	8.37585e-05	0.00106319
169133|Citricoccus	-0.834192	13.6555	15.8731	8.69779e-05	0.00108653
267849|Nitrincola	-1.22506	7.35203	15.8283	8.89476e-05	0.00109378
1964366|Nissabacter	-1.3601	7.42844	15.6592	9.67862e-05	0.00117186
36739|Dermabacter	1.15595	11.2607	14.9828	0.000135828	0.00161933
2036021|Agarilytica	1.65601	8.54398	14.9533	0.000137859	0.00161933
1663717|Herbinix	-1.12795	8.82775	14.8933	0.00014208	0.00164437
191769|Marinilactibacillus	-1.23067	10.6299	14.6723	0.000158781	0.00181102
53392|Thiodictyon	1.22566	9.18904	14.5711	0.000167078	0.00185003
1849828|Paeniclostridium	-1.43198	8.78469	14.5561	0.00016834	0.00185003
85076|Marichromatium	1.30402	9.08313	14.5454	0.000169253	0.00185003
44|Melittangium	1.60656	9.97565	14.4255	0.000179796	0.00193835
1911577|Oryzomicrobium	-0.745965	12.0957	14.3969	0.000182403	0.00193988
138|Borrelia	1.3275	9.0015	14.3529	0.000186496	0.00195697
28895|Thermoanaerobacterium	-0.96393	11.626	13.3034	0.000317296	0.00328568
1843210|Anaerocolumna	-0.941905	10.833	13.0082	0.000368745	0.00376886
198251|Candidatus Pelagibacter	1.00479	9.77445	12.5969	0.000454871	0.00458953
990721|Christensenella	-0.835783	10.5916	12.3598	0.000513538	0.00511588
273135|Candidatus Cardinium	1.14056	8.74101	12.2366	0.00054701	0.00538121
231683|Saccharospirillum	-1.05063	7.80625	11.993	0.00061985	0.0060225
1849822|Paraclostridium	-1.07384	7.17337	11.7518	0.000701737	0.00673497
1434050|Zhongshania	1.22623	6.60986	11.5174	0.000791859	0.00750835
2675231|Mesobacillus	-0.875213	9.25697	11.2868	0.000892022	0.00828044
43356|Kutzneria	-0.837877	9.34865	11.2818	0.00089433	0.00828044
86795|Marmoricola	-0.59725	10.9716	11.2148	0.000925833	0.00847245
1160973|Auritidibacter	-0.740528	11.6379	11.1884	0.000938593	0.00849049
1443590|Ferriphaselus	1.09774	9.31583	10.9461	0.00106411	0.00951649
187492|Thalassolituus	1.05974	7.86375	10.8758	0.00110365	0.00975921
28250|Ornithobacterium	1.13307	9.30328	10.8046	0.00114524	0.00993877
2035811|Pseudodesulfovibrio	0.892443	8.98413	10.7764	0.00116213	0.00993877
427753|Humibacter	-0.849029	9.6516	10.7586	0.00117289	0.00993877
1611681|Mucinivorans	1.07301	9.67036	10.756	0.00117447	0.00993877
2603324|Acidibrevibacterium	-0.728761	11.1925	10.6107	0.00126664	0.0104867
1769729|Hathewaya	-0.944127	7.38268	10.5942	0.00127761	0.0104867
2733115|Naesvirus	0.943555	4.09869	10.5918	0.00127919	0.0104867
2679910|Intestinibaculum	-0.795678	8.30559	10.4468	0.00137953	0.0111927
1941236|Gemykibivirus	1.6044	4.62313	10.3948	0.00141746	0.011383
89966|Hymenobacter	0.860363	14.2565	10.2895	0.00149749	0.0117886
2005363|Auricoccus	-0.797617	11.2681	10.2769	0.00150735	0.0117886
305899|Endozoicomonas	-0.946559	9.09955	10.2699	0.00151289	0.0117886
1335745|Spiribacter	1.00629	10.4303	10.196	0.00157246	0.0121326
1237|Piscirickettsia	0.961627	8.6518	9.8884	0.00184709	0.0141132
99|Ancylobacter	0.879313	9.94304	9.81916	0.00191539	0.0144943
10405|Orthohepadnavirus	3.15604	16.1641	9.71565	0.00202234	0.0151579
119541|Rhodobaca	0.92724	9.26437	9.64302	0.002101	0.0155989
12141|Tombusvirus	0.847523	4.02838	9.68278	0.00230453	0.0169501
56106|Cylindrospermum	1.2304	7.58204	9.22965	0.00261215	0.0190348
307628|Petrimonas	-0.833452	9.86929	9.04037	0.00288705	0.020845
939|Hydrogenobacter	-1.00574	9.48707	8.89981	0.00311018	0.0222519
28196|Arcobacter	0.781992	11.2688	8.82595	0.00323443	0.0229324
1007|Saprospira	0.956338	8.9044	8.68122	0.00349282	0.0245433
1291539|Candidatus Methanomethylophilus	1.14037	6.1818	8.57048	0.00370474	0.025802
106146|Pelistega	1.05259	11.4312	8.53094	0.00378354	0.0261197
367298|Phycicoccus	-0.534826	11.2842	8.44823	0.00395401	0.0270592
417127|Zunongwangia	-0.984005	7.63701	8.33464	0.00420103	0.0285018
745364|Luteipulveratus	-0.630614	9.44423	8.23844	0.00442257	0.0297484
57739|Vogesella	-0.828498	10.2672	8.2125	0.00448433	0.0299082
947567|Litoreibacter	-0.769579	7.4099	8.17586	0.00457307	0.0302046
1649279|Epibacterium	1.1042	7.41548	8.16264	0.00460553	0.0302046
299261|Tateyamaria	0.954738	7.54855	8.13051	0.00468541	0.0304745
1524217|Labilithrix	0.669076	11.6262	8.08546	0.00479982	0.0309627
353799|Halostagnicola	-0.887162	6.89931	7.97177	0.00510143	0.0323378
1569|Sporosarcina	-0.843492	12.3083	7.96852	0.00511034	0.0323378
1579315|Halocynthiibacter	-0.807227	8.58488	7.9591	0.00513625	0.0323378
40222|Methylophaga	1.13798	11.3097	7.93613	0.00519994	0.0324011
465|Tatlockia	1.07047	7.53876	7.92588	0.00522865	0.0324011
2282523|Methylorubrum	-1.17585	16.246	7.85166	0.00544127	0.0334553
90243|Oligella	0.999686	11.4283	7.69902	0.00590695	0.036037
869806|Marivirga	-0.713233	8.72697	7.579	0.00630171	0.0381496
1960084|Rodentibacter	0.865226	6.11326	7.50647	0.00655332	0.0391697
1443919|Tabrizicola	-0.564175	10.1012	7.48787	0.00661951	0.0391697
2697|Heliobacterium	-0.691119	7.43362	7.48786	0.00661953	0.0391697
2370|Xylella	0.681448	9.39192	7.34396	0.00715528	0.0420239
1395974|Tardiphaga	0.479342	11.3268	7.30701	0.00729989	0.0425556
1616789|Salinispira	0.987898	7.24584	7.28887	0.00737197	0.0426599
29393|Dolosigranulum	-0.630882	12.5024	7.24292	0.0075579	0.0434166
70774|Hydrogenophilus	-0.636916	12.0542	7.16467	0.0078857	0.0446844
40751|Thioploca	0.776849	8.03501	7.15546	0.00792524	0.0446844
2600304|Baekduia	-0.569866	11.9202	7.14996	0.00794895	0.0446844
1184606|Austwickia	-0.589318	9.76527	7.07985	0.0082576	0.0460903
32014|Iodobacter	0.91827	6.94323	7.01122	0.00857171	0.0475066
76831|Myroides	-0.620188	9.32127	6.94316	0.00889537	0.0489556
1692042|Sulfurifustis	0.463022	9.65946	6.91725	0.00902184	0.0493069
885864|Jeongeupia	1.16216	11.2438	6.7646	0.00980576	0.0528706
2304693|Pseudoclostridium	0.918714	8.47112	6.75627	0.00985049	0.0528706
241192|Thermodesulfatator	0.794329	6.36749	6.75164	0.00987544	0.0528706
376488|Halotalea	0.883521	8.33766	6.64764	0.0104536	0.055588
1754|Thermoanaerobacter	-0.630147	9.21727	6.60109	0.0107237	0.0564693
262|Francisella	0.698144	11.1593	6.59443	0.0107629	0.0564693
46352|Agrococcus	-0.425267	12.8167	6.52698	0.0111685	0.0582093
1847725|Lawsonella	-0.576543	14.3392	6.48088	0.0114548	0.0593085
245876|Nitratireductor	-0.458866	9.57358	6.26931	0.0128692	0.0661965
286130|Sulfuricurvum	0.966422	8.624	6.18081	0.0135133	0.0690585
1654741|Bombella	0.650996	10.5992	5.97684	0.0151282	0.0768124
2316020|Mediterraneibacter	-0.715698	9.80154	5.94526	0.0153955	0.0772416
10358|Cytomegalovirus	0.923599	4.71052	5.94368	0.0154091	0.0772416
2094023|Glaesserella	0.692463	9.69464	5.89064	0.0158696	0.0790466
577309|Paraprevotella	-0.718972	9.12647	5.85365	0.0161992	0.079877
140458|Thermacetogenium	-0.723687	8.29689	5.8492	0.0162393	0.079877
33055|Candidatus Kinetoplastibacterium	0.758725	10.3995	5.83573	0.0163614	0.0799777
186831|Acetoanaerobium	-0.711339	8.12054	5.80481	0.0166453	0.0808635
294702|Proteiniphilum	-0.681776	9.372	5.73225	0.0173318	0.0836816
1738655|Woeseia	0.830878	9.37625	5.70803	0.0175673	0.0843018
1934947|Immundisolibacter	0.547248	10.0778	5.68234	0.0178209	0.0850004
71|Simonsiella	-0.672007	8.2195	5.62476	0.0184031	0.0865052
44000|Caldicellulosiruptor	0.780397	9.56085	5.62276	0.0184237	0.0865052
2035712|Guyparkeria	1.09421	11.4051	5.61864	0.0184662	0.0865052
425|Methylosinus	0.476359	9.05326	5.52308	0.0194801	0.0907148
1677050|Novibacillus	-0.571244	9.89918	5.49082	0.0198353	0.0918259
29526|Syntrophobacter	0.734541	8.81142	5.4484	0.0203127	0.0934859
453161|Candidatus Nitrotoga	0.607452	9.39588	5.43274	0.0204919	0.0937622
347533|Zobellella	0.752145	7.47663	5.41588	0.0206866	0.0941062
890|Desulfuromonas	0.68521	9.27682	5.39235	0.0209618	0.0948098
114627|Alkaliphilus	-0.612074	8.40235	5.30195	0.0220547	0.0989049
1869285|Allofrancisella	0.823731	8.64812	5.29217	0.0221764	0.0989049
416|Methylomonas	0.566761	9.1952	5.2863	0.0222498	0.0989049
2321115|Halarcobacter	0.802216	6.64356	5.27675	0.0223698	0.0989049
1902583|Candidatus Desulfofervidus	0.539232	9.10527	5.21054	0.0232203	0.101657
1784836|Fermentimonas	-0.739748	9.95354	5.20822	0.0232507	0.101657
36853|Desulfitobacterium	-0.470237	9.46531	5.1806	0.0236159	0.102578
1572860|Hartmannibacter	-0.464852	10.2171	5.17266	0.0237221	0.102578
204619|Candidatus Nardonella	-0.633292	8.10684	5.15668	0.023937	0.102847
346096|Paludibacter	-0.697475	10.279	5.13075	0.0242903	0.102847
461|Fluoribacter	0.749666	5.90131	5.1287	0.0243184	0.102847
280472|Aquiflexum	-0.724084	8.13393	5.12242	0.0244049	0.102847
143222|Salegentibacter	-0.791787	8.89192	5.11368	0.0245258	0.102847
289201|Pontibacillus	-0.715383	7.82774	5.11061	0.0245684	0.102847
1302410|Candidatus Annandia	0.723205	6.98547	5.09086	0.0248444	0.103452
160795|Ureibacillus	0.833691	8.28997	5.04117	0.0255532	0.105812
2489367|Candidatus Cyclonatronum	0.817158	12.8223	5.0211	0.0258453	0.105812
234|Brucella	0.417497	10.2665	5.01552	0.0259271	0.105812
358023|Lutibacter	0.724216	6.92524	5.01405	0.0259488	0.105812
68288|Cyclobacterium	-0.552991	7.89074	4.99537	0.026225	0.106387
2078575|Psychromicrobium	0.556749	9.00779	4.95063	0.0268994	0.107866
1193515|Snodgrassella	0.654153	8.93779	4.94489	0.0269872	0.107866
45989|Methanoculleus	-0.6687	6.20475	4.944	0.0270008	0.107866
1335631|Frischella	0.72238	7.80323	4.9195	0.0273792	0.108658
2425|Teredinibacter	0.847677	10.1212	4.91335	0.027475	0.108658
1184396|Mesotoga	0.625811	7.05133	4.88154	0.0279764	0.109503
329857|Cohnella	-0.516359	10.2189	4.87925	0.0280129	0.109503
392332|Geoalkalibacter	0.632286	8.65752	4.8734	0.0281063	0.109503
189384|Candidatus Tremblaya	0.824391	10.9629	4.84769	0.0285206	0.11057
2207|Methanosarcina	-0.577827	8.05725	4.83794	0.0286793	0.11064
57495|Dermacoccus	0.605841	10.6538	4.82225	0.0289368	0.111089
171003|Caloranaerobacter	-0.6243	8.72044	4.80203	0.0292722	0.111831
1912217|Pseudopropionibacterium	0.63641	11.3637	4.71865	0.0306986	0.116714
1621534|Paraglaciecola	0.736576	9.5439	4.68937	0.0312168	0.118113
599651|Bermanella	0.878471	9.22189	4.664	0.0316731	0.119266
33951|Acetobacterium	-0.630933	9.51965	4.6452	0.0320157	0.119983
57479|Microvirgula	0.636068	8.66439	4.63673	0.0321713	0.119994
28050|Lachnospira	-0.611114	9.66776	4.59003	0.0330438	0.122667
40136|Oligotropha	0.454887	10.3316	4.57277	0.0333727	0.123073
2115980|Candidatus Phycorickettsia	-0.388774	9.08825	4.56791	0.0334657	0.123073
1097466|Defluviimonas	-0.429849	10.2977	4.54503	0.0339082	0.12337
29407|Rhodoplanes	0.445882	11.7169	4.53525	0.0340991	0.12337
2675230|Cytobacillus	-0.845782	11.4377	4.5229	0.0343419	0.12337
2058174|Antarcticibacterium	-0.842253	10.7538	4.52097	0.03438	0.12337
556257|Pseudolabrys	0.334747	10.6883	4.51634	0.0344717	0.12337
45669|Salinicoccus	-0.678289	12.7652	4.51556	0.034487	0.12337
33886|Rathayibacter	0.394472	11.4671	4.4813	0.0351732	0.125255
33877|Agromyces	-0.320352	12.2018	4.4584	0.0356397	0.126329
267408|Arsenicicoccus	0.530658	10.8428	4.45081	0.0357958	0.126329
332246|Halalkalicoccus	-0.638278	8.51193	4.42774	0.0362747	0.127447
1172191|Catenovulum	0.713283	9.48774	4.41234	0.036598	0.128012
1980513|Candidatus Nitrosoglobus	-0.61448	7.33744	4.40238	0.0368088	0.128179
1299429|Yuavirus	0.968137	4.95187	4.38318	0.0372186	0.129036
99479|Tetrasphaera	-0.427221	9.18452	4.36681	0.037572	0.129297
648802|Rummeliibacillus	-0.651904	7.46366	4.36448	0.0376226	0.129297
283735|Leeuwenhoekiella	-0.684771	6.4081	4.32742	0.0384366	0.13152
114185|Candidatus Carsonella	0.517859	9.59175	4.29441	0.0391776	0.133475
57665|Sulfurospirillum	0.581594	9.1072	4.28628	0.0393622	0.133526
1705353|Aurantimicrobium	0.704771	10.7375	4.27366	0.0396509	0.133928
748770|Dolichospermum	0.910793	10.0304	4.2423	0.0403776	0.134977
204447|Skermanella	0.718679	13.7245	4.23886	0.0404583	0.134977
773|Bartonella	0.319076	11.1198	4.23811	0.0404758	0.134977
1911549|Raineyella	0.558577	10.3603	4.22431	0.040801	0.135218
1981050|Phoenicibacter	-0.543848	8.06702	4.22048	0.0408918	0.135218
518753|Luteolibacter	0.351933	10.162	4.20353	0.0412958	0.135657
292486|Avibacterium	0.540355	7.00505	4.20047	0.0413693	0.135657
2024975|Silvanigrella	0.619813	7.01804	4.17535	0.041977	0.137078
2276|Pyrobaculum	0.702566	7.14483	4.15508	0.0424744	0.137207
40544|Sutterella	0.734503	12.987	4.1537	0.0425085	0.137207
86331|Mogibacterium	-0.546358	9.5602	4.15245	0.0425393	0.137207
1541445|Candidatus Phaeomarinobacter	0.618995	7.64975	4.07962	0.0443812	0.142563
1511648|Defluviitoga	-0.551667	6.07627	4.05631	0.0449885	0.143927
752201|Sphaerospermopsis	0.763466	7.70407	4.00509	0.0463537	0.147694
28228|Colwellia	0.630346	9.33765	3.98824	0.0468125	0.148373
48073|Microbulbifer	0.476389	9.93652	3.98345	0.0469438	0.148373
335927|Thalassobius	0.69455	6.86685	3.94621	0.0479778	0.150846
2005380|Mariniblastus	0.574203	8.29427	3.93492	0.0482961	0.150846
34098|Blattabacterium	0.415469	10.4083	3.93474	0.0483012	0.150846
1653174|Actinotignum	0.543152	8.29038	3.91802	0.0487767	0.150974
75905|Thermocrinis	-0.658757	8.17702	3.91114	0.0489736	0.150974
204476|Labrys	0.498081	10.9229	3.90185	0.0492411	0.150974
336809|Candidatus Sulcia	-0.524652	9.92275	3.90176	0.0492438	0.150974
655184|Candidatus Thioglobus	0.599831	8.87458	3.89976	0.0493017	0.150974
43773|Syntrophus	-0.452969	7.61406	3.86839	0.0502176	0.153183
51514|Dehalobacterium	-0.577573	7.22484	3.82588	0.0514876	0.156451
1203|Scytonema	0.587613	11.4645	3.80286	0.0521895	0.157974
1511635|Aquisphaera	0.475367	10.9135	3.78511	0.052738	0.159022
261825|Agarivorans	0.58187	7.68022	3.77195	0.0531482	0.159647
162491|Oerskovia	-0.450648	9.09523	3.72978	0.0544865	0.16263
896|Desulfococcus	-0.40156	9.65255	3.72238	0.0547253	0.16263
59735|Bergeyella	0.585245	9.87186	3.71946	0.0548196	0.16263
52959|Polaribacter	0.519796	9.26147	3.7149	0.0549676	0.16263
1649468|Melaminivora	0.33306	11.3407	3.70241	0.0553744	0.162897
1751872|Lacimicrobium	0.632166	6.40733	3.69944	0.0554718	0.162897
527198|Mariniflexile	0.625298	6.44633	3.62458	0.0579844	0.169642
447020|Adlercreutzia	-0.572479	7.59742	3.59657	0.0589556	0.171845
370735|Zhihengliuella	0.636698	7.57072	3.58075	0.0595117	0.172825
2707020|Aerosticca	0.442103	8.70456	3.56836	0.0599512	0.173462
360528|Pelagibaca	-0.488355	8.19836	3.56159	0.0601931	0.173524
2045213|Candidatus Fonsibacter	0.474622	8.82978	3.52289	0.0615943	0.176915
1525371|Neorhizobium	-0.373964	10.7902	3.50558	0.0622325	0.178098
76632|Thermobacillus	0.60919	9.95649	3.49423	0.0626548	0.178657
292691|Gramella	-0.502404	9.49739	3.45989	0.0639511	0.181695
1537406|Bacterioplanes	-0.683884	7.93143	3.43875	0.0647633	0.183341
46238|Entomoplasma	0.545312	6.52644	3.41301	0.0657674	0.185173
2675229|Peribacillus	-0.515312	9.21713	3.4076	0.0659803	0.185173
1980514|Halodesulfurarchaeum	0.651765	6.35704	3.39993	0.066284	0.185173
171|Leptospira	-0.416939	10.8796	3.39367	0.0665327	0.185173
159345|Roseibacterium	0.536382	9.14208	3.39201	0.0665986	0.185173
1608298|Thiolapillus	0.587718	8.41412	3.38641	0.0668224	0.185173
34102|Sphaerotilus	0.475842	12.2472	3.36697	0.067605	0.186685
1779136|Bradymonas	-0.545353	7.82656	3.31695	0.0696647	0.191653
281472|Jiangella	0.446824	10.5906	3.30565	0.0701392	0.191653
2060722|Labilibaculum	-0.493997	9.54339	3.30213	0.0702875	0.191653
508459|Cloacibacillus	0.657826	7.98983	3.29964	0.070393	0.191653
542837|Zindervirus	-0.67991	4.36604	3.29424	0.0706217	0.191653
2571159|Mycetohabitans	0.643942	11.7611	3.2689	0.0717065	0.193839
187|Aquaspirillum	0.572635	9.7954	3.26396	0.07192	0.193839
1921582|Orrella	0.43832	8.05301	3.2509	0.072488	0.194526
96|Gallionella	0.675653	10.614	3.24676	0.0726691	0.194526
2685905|Salicibibacter	-0.516747	10.2954	3.22113	0.0738007	0.196437
106591|Ensifer	0.386008	9.83536	3.2193	0.0738821	0.196437
354203|Yangia	0.475451	8.88907	3.19601	0.0749286	0.198548
203804|Candidatus Blochmannia	-0.399418	11.5078	3.16375	0.0764041	0.200874
1055692|Chitinolyticbacter	0.676416	9.92375	3.16043	0.0765574	0.200874
244698|Gillisia	0.642152	7.83346	3.1572	0.0767072	0.200874
776|Coxiella	0.540863	10.7974	3.15226	0.0769368	0.200874
2689587|Suicoccus	-0.615185	11.9688	3.14464	0.0772928	0.200874
1434032|Pontimonas	-0.475966	10.5318	3.14368	0.0773377	0.200874
227873|Pannonibacter	0.449494	9.24466	3.12885	0.0780357	0.20202
104267|Tenacibaculum	0.42823	8.92975	3.09953	0.0794356	0.204689
447467|Simiduia	0.520573	7.56412	3.0964	0.0795867	0.204689
1825023|Candidatus Nitrosotenuis	-0.536127	6.77397	3.07108	0.0808201	0.20693
810|Chlamydia	0.45749	9.66361	3.06321	0.0812077	0.20693
72173|Citromicrobium	-0.407275	8.3466	3.06242	0.0812468	0.20693
768|Anaplasma	0.325868	8.61307	3.03346	0.0826912	0.209929
1649478|Pelolinea	0.547575	10.2179	3.00238	0.084273	0.213257
34008|Rhodovulum	-0.364911	9.86177	2.96867	0.086025	0.21667
82982|Obesumbacterium	-0.505267	5.47208	2.96453	0.0862429	0.21667
958|Bdellovibrio	-0.25925	12.0788	2.96066	0.0864476	0.21667
265488|Rhodopirellula	-0.547993	7.12538	2.94549	0.087253	0.217994
1100891|Paenalcaligenes	0.450575	10.388	2.94007	0.087543	0.218026
290174|Aquimarina	0.448218	9.21027	2.9147	0.0889141	0.220743
219181|Ottowia	0.280985	12.0605	2.89982	0.0897289	0.222065
162289|Peptoniphilus	-0.345567	12.5535	2.87832	0.0909209	0.223882
1543705|Nitrospirillum	0.454402	10.1955	2.87633	0.0910319	0.223882
249529|Caldanaerobacter	-0.448797	7.86345	2.86516	0.0916589	0.224626
83612|Psychroflexus	-0.497938	8.28292	2.86079	0.0919054	0.224626
898|Desulfomicrobium	-0.394985	8.73477	2.84303	0.0929146	0.225852
2676060|Allopseudarcicella	0.604288	11.0866	2.84187	0.0929809	0.225852
447237|Frondihabitans	0.381945	9.60676	2.80837	0.0949194	0.229751
233191|Caldilinea	-0.375825	10.7686	2.8041	0.0951701	0.229751
292635|Laceyella	0.512435	8.96476	2.77981	0.0966073	0.232508
236752|Fastidiosipila	-0.62823	10.6559	2.76781	0.0973261	0.233523
1434046|Sphingorhabdus	0.259961	10.732	2.75418	0.0981501	0.234441
1073987|Halorientalis	-0.443141	7.32602	2.75164	0.0983044	0.234441
359336|Castellaniella	0.475044	9.93445	2.74332	0.0988116	0.234939
2330|Halanaerobium	-0.391917	9.38682	2.73626	0.0992444	0.235224
472568|Devriesea	-0.429086	7.73874	2.73163	0.0995294	0.235224
240411|Chitinimonas	0.534458	9.78341	2.71105	0.100807	0.237531
2740557|Pauljensenia	-0.452119	9.26456	2.70427	0.101232	0.237623
187217|Tunavirus	-0.570558	4.70075	2.7008	0.10145	0.237623
289244|Xylanimicrobium	0.475639	8.71324	2.69586	0.101762	0.237645
1209327|Flavivirga	0.538937	6.31227	2.65915	0.10411	0.242409
96492|Frigoribacterium	0.414488	9.91529	2.64692	0.104906	0.243542
74032|Antarctobacter	0.499149	7.22978	2.63274	0.105836	0.244979
44471|Microcoleus	0.675882	13.1127	2.62397	0.106416	0.245408
327159|Candidatus Accumulibacter	0.414175	9.34733	2.62053	0.106645	0.245408
135575|Idiomarina	0.46911	9.35093	2.60801	0.107481	0.246028
401618|Candidatus Riesia	0.595878	8.82353	2.60259	0.107846	0.246028
984996|Mobilicoccus	-0.320476	10.1583	2.60004	0.108018	0.246028
2717|Cardiobacterium	0.48906	10.5502	2.59786	0.108165	0.246028
1936111|Fuerstia	0.455774	8.33515	2.554	0.111174	0.252143
1802983|Candidatus Fokinia	0.340981	7.81575	2.5053	0.114623	0.259219
2478349|Indioceanicola	-0.316059	9.96478	2.47785	0.116619	0.26229
2690159|Anaerohalosphaera	-0.435405	8.25547	2.47747	0.116647	0.26229
2737|Vagococcus	-0.424617	10.222	2.47219	0.117035	0.262413
41707|Lawsonia	0.357915	9.03674	2.45403	0.118383	0.264155
907364|Phytohabitans	-0.300801	9.88651	2.44832	0.11881	0.264155
1826864|Candidatus Nitrosocosmicus	-0.425528	9.7283	2.4482	0.118819	0.264155
1649490|Rubinisphaera	-0.389503	8.37177	2.39051	0.123234	0.273197
295595|Candidatus Hepatoplasma	0.553605	9.1765	2.35701	0.12588	0.27828
830|Butyrivibrio	-0.374854	10.3702	2.31487	0.129301	0.28406
1778653|Sulfuriferula	0.384021	9.61945	2.31207	0.129532	0.28406
246875|Algoriphagus	-0.333887	9.86087	2.31151	0.129578	0.28406
171163|Halosimplex	-0.421476	7.49191	2.29126	0.131262	0.286954
75309|Rhodanobacter	0.360479	9.72817	2.26646	0.133359	0.29073
286104|Winogradskyella	0.459213	10.3465	2.262	0.13374	0.290755
54066|Xylophilus	0.342692	8.98194	2.2538	0.134443	0.291327
1470540|Jeotgalibaca	-0.424918	11.952	2.25032	0.134743	0.291327
1734920|Pseudorhodoplanes	0.266528	9.69696	2.22599	0.136862	0.295072
1623304|Moineauvirus	-0.280244	3.9558	2.22052	0.137343	0.295072
497726|Nitrososphaera	-0.393951	8.6981	2.2176	0.1376	0.295072
1607807|Candidatus Methanoplasma	-0.593003	5.77677	2.19801	0.139344	0.297999
2529408|Schaalia	-0.332739	12.6431	2.18914	0.140141	0.29857
332102|Fluviicola	0.49889	8.6576	2.18661	0.140369	0.29857
2304692|Hungateiclostridium	-0.354362	9.32705	2.17445	0.141473	0.299367
46205|Pseudobutyrivibrio	-0.47615	8.56743	2.16731	0.142126	0.299367
1778601|Apibacter	0.369447	9.11758	2.16571	0.142272	0.299367
84406|Virgibacillus	0.415323	10.5801	2.1643	0.142402	0.299367
1961799|Lacunisphaera	-0.371147	8.25282	2.16164	0.142646	0.299367
379070|Gilvibacter	-0.462267	7.21888	2.13951	0.144699	0.302868
191028|Leisingera	0.342342	9.62102	2.12901	0.145684	0.304121
1623297|Stanholtvirus	-0.518588	4.50389	2.12105	0.146438	0.304885
141450|Oleiphilus	0.438681	7.76714	2.1134	0.147165	0.305515
375928|Natranaerobius	-0.365132	7.30431	2.10971	0.147517	0.305515
1273155|Thiohalobacter	0.370497	9.0654	2.09844	0.148598	0.306518
499228|Tepidanaerobacter	-0.382607	7.44695	2.09656	0.14878	0.306518
79603|Denitrobacterium	-0.360368	8.79682	2.08681	0.149724	0.307129
59734|Empedobacter	-0.353917	10.9024	2.08544	0.149857	0.307129
73778|Methylocaldum	0.373247	8.04904	2.06432	0.151928	0.310565
1579506|Roseimaritima	0.450011	7.27804	2.0575	0.152604	0.311138
2126281|Mycolicibacillus	0.382061	8.15696	2.04086	0.154268	0.312965
682522|Ilumatobacter	-0.268911	11.6469	2.04058	0.154296	0.312965
123|Pirellula	0.334211	10.1933	2.02012	0.156369	0.315739
121871|Haloterrigena	0.625509	11.0648	2.01918	0.156465	0.315739
119044|Filomicrobium	-0.321684	10.0579	2.01288	0.157111	0.316231
311181|Denitratisoma	-0.262507	10.9752	1.99468	0.158993	0.318923
157591|Sterolibacterium	0.394453	12.2152	1.99212	0.159259	0.318923
28884|Hydrogenovibrio	0.51831	8.6845	1.9797	0.16056	0.320193
1522431|Thermosulfurimonas	0.423483	6.36376	1.97831	0.160707	0.320193
44474|Pleurocapsa	0.615528	9.73781	1.93849	0.164967	0.327851
157920|Cellulosimicrobium	-0.26829	10.9108	1.93359	0.165499	0.328081
1227|Nitrosococcus	0.312256	10.0706	1.91164	0.167912	0.331217
744724|Halarchaeum	-0.402145	6.50658	1.91127	0.167953	0.331217
1158|Oscillatoria	0.510836	13.51	1.90775	0.168344	0.331217
258255|Pseudovibrio	-0.465923	8.84418	1.89124	0.170191	0.334015
178469|Arenibacter	0.432941	6.94774	1.85324	0.174531	0.341681
291183|Lacinutrix	0.420969	6.54908	1.82791	0.177494	0.34521
2025617|Ketobacter	-0.449455	10.2538	1.82494	0.177847	0.34521
1649486|Rhizorhabdus	0.270776	9.05435	1.82362	0.178002	0.34521
1137960|Allokutzneria	-0.35018	9.60992	1.81823	0.178643	0.34521
2256|Natronobacterium	0.460585	6.37512	1.81319	0.179244	0.34521
518733|Microterricola	0.297385	9.48612	1.81258	0.179317	0.34521
238783|Pseudorhodobacter	-0.352068	9.55333	1.81185	0.179404	0.34521
1755825|Egicoccus	-0.373692	9.71603	1.80198	0.18059	0.34618
152267|Pigmentiphaga	0.358541	11.5057	1.80034	0.180788	0.34618
2765402|Natrarchaeobaculum	-0.345801	8.18555	1.79478	0.181461	0.346625
529881|Candidatus Aquiluna	0.287294	10.2401	1.77905	0.183379	0.349442
1186|Calothrix	0.378228	12.8853	1.75042	0.186932	0.355352
76833|Actinobaculum	-0.356806	9.45451	1.72252	0.190472	0.361209
1915401|Roseitalea	-0.274553	8.36804	1.70994	0.192095	0.362077
230666|Chitinibacter	0.511035	9.8593	1.70992	0.192097	0.362077
2220|Methanolobus	-0.43106	4.50075	1.70828	0.19231	0.362077
180541|Salinisphaera	0.342103	8.99894	1.67283	0.196974	0.36942
82980|Leminorella	0.382651	5.80159	1.67152	0.197149	0.36942
252306|Robiginitalea	0.375451	7.50055	1.66741	0.1977	0.369572
125287|Ornithinimicrobium	0.230483	13.8446	1.6602	0.198668	0.370502
293431|Haloquadratum	0.501841	5.75719	1.65138	0.199861	0.371846
2019482|Brevefilum	0.39222	10.5984	1.63762	0.20174	0.37236
573657|Candidatus Hodgkinia	-0.299193	11.5566	1.63585	0.201983	0.37236
490567|Arenimonas	0.307225	10.2509	1.63582	0.201987	0.37236
34067|Cycloclasticus	0.39944	6.74844	1.63551	0.20203	0.37236
225842|Formosa	0.331906	9.62598	1.62634	0.203296	0.373659
2700084|Urechidicola	-0.370837	7.31143	1.62353	0.203684	0.373659
153497|Kozakia	-0.375343	7.17156	1.61168	0.205338	0.375816
28236|Petrotoga	0.426755	5.47381	1.60658	0.206054	0.376252
282132|Candidatus Protochlamydia	0.380703	9.85526	1.6026	0.206615	0.376403
69578|Cryobacterium	0.226743	10.3931	1.59241	0.20806	0.378161
257820|Kerstersia	0.314339	8.14642	1.58409	0.209249	0.379444
2071|Saccharothrix	-0.312005	10.4842	1.56833	0.211522	0.382685
1163|Anabaena	0.357953	10.3161	1.5578	0.213059	0.384581
230494|Reinekea	0.327721	8.20469	1.55133	0.214008	0.385411
1301080|Candidatus Nasuia	0.391411	11.4347	1.53682	0.216157	0.388391
152161|Stappia	0.28388	9.09496	1.53212	0.216859	0.388765
953|Wolbachia	0.25118	10.9648	1.51836	0.218929	0.391584
29574|Taylorella	0.397747	11.9925	1.4972	0.222159	0.39646
336276|Olleya	0.317217	7.35555	1.49001	0.223269	0.397108
1926259|Pseudactinotalea	0.254403	9.41307	1.48832	0.223531	0.397108
83614|Luteimonas	0.23291	12.169	1.48129	0.224625	0.398153
2420|Thermosipho	0.317086	7.84631	1.47443	0.225699	0.398375
1055688|Sandaracinus	-0.202298	11.0827	1.47402	0.225762	0.398375
1988|Actinomadura	-0.207107	11.2417	1.46301	0.2275	0.400542
2039240|Anaerotignum	-0.435529	10.0119	1.45584	0.228638	0.401648
623276|Maritalea	0.358139	8.36334	1.45254	0.229165	0.401677
318147|Paucibacter	0.278158	10.5809	1.43687	0.231687	0.405194
293088|Martelella	0.213199	9.80866	1.38989	0.239451	0.417845
141948|Thermomonas	-0.196249	11.3481	1.38235	0.240727	0.419141
367771|Marinovum	0.357682	7.8381	1.37485	0.242003	0.419387
53945|Octadecabacter	0.312337	8.62932	1.37281	0.242353	0.419387
55968|Leucobacter	0.202024	11.4713	1.37214	0.242466	0.419387
432330|Tumebacillus	-0.276335	10.3396	1.36149	0.244298	0.421231
1073986|Halobellus	-0.351888	6.56165	1.35973	0.244603	0.421231
644355|Inhella	0.246782	12.1644	1.35288	0.245792	0.422354
1649459|Hungatella	-0.363877	7.95608	1.33514	0.248905	0.426771
1940138|Candidatus Walczuchella	0.298917	6.99325	1.32154	0.251324	0.429982
1656823|Halanaeroarchaeum	-0.364752	5.56248	1.31608	0.252302	0.430148
414371|Aureimonas	-0.249939	10.8797	1.31403	0.252672	0.430148
188143|Enterovibrio	0.336637	6.9494	1.31187	0.25306	0.430148
56358|Sandaracinobacter	0.212989	9.80449	1.27555	0.25972	0.439828
365348|Pelosinus	0.285993	9.71228	1.27473	0.259873	0.439828
649460|Filimonas	0.262224	9.90877	1.25766	0.263081	0.443161
1905344|Ruthenibacterium	-0.355642	10.3924	1.2551	0.263566	0.443161
1644057|Salinigranum	-0.356622	7.0668	1.25411	0.263754	0.443161
626119|Ruania	0.233049	10.0151	1.25232	0.264095	0.443161
117156|Actinopolymorpha	-0.203811	10.0369	1.23874	0.266695	0.446572
142577|Prauserella	0.343462	9.9304	1.22883	0.268611	0.448826
1331730|Chryseoglobus	-0.245951	9.26614	1.22539	0.269281	0.448991
75687|Neptunomonas	0.348577	7.38213	1.20898	0.272505	0.451855
48075|Marinobacterium	0.273822	8.01697	1.20711	0.272874	0.451855
44258|Caloramator	-0.339729	8.8288	1.20417	0.273457	0.451855
158481|Hahella	0.311493	8.3977	1.2023	0.273831	0.451855
299566|Adhaeribacter	0.318006	11.4157	1.20003	0.274281	0.451855
60846|Halogeometricum	0.367963	6.07478	1.19923	0.274443	0.451855
76634|Mycetocola	-0.274268	10.6821	1.18679	0.27694	0.455013
1649470|Minicystis	0.2164	10.3486	1.18317	0.277672	0.455267
221065|Kordia	0.329867	9.75543	1.14887	0.284733	0.465872
1623298|Phietavirus	-0.313424	4.05749	1.12653	0.289455	0.472616
1682492|Candidatus Tachikawaea	-0.350038	6.33745	1.09983	0.295232	0.481051
169055|Nordella	-0.164428	10.5399	1.0683	0.302244	0.491459
2038|Tropheryma	0.224563	9.55451	1.05947	0.304247	0.493696
252356|Maribacter	0.290402	7.81273	1.05441	0.305403	0.494552
1101|Prosthecochloris	-0.262674	7.29252	1.05073	0.306248	0.494901
28209|Chelatococcus	0.195827	10.4306	1.04731	0.307034	0.495156
71666|Waddlia	0.262896	7.74511	1.01873	0.313714	0.504894
1283313|Alloprevotella	-0.346132	11.831	1.01227	0.315251	0.50541
72763|Tessaracoccus	0.217052	13.2356	1.00965	0.315877	0.50541
651660|Paenisporosarcina	-0.26722	10.8614	1.00451	0.317111	0.50541
743714|Orbus	-0.308839	6.93637	1.00337	0.317384	0.50541
864|Pectinatus	-0.30868	6.38908	0.998736	0.318502	0.50541
332951|Halovivax	-0.307468	7.15648	0.998695	0.318512	0.50541
428711|Jonquetella	-0.274847	6.63595	0.998622	0.31853	0.50541
1217416|Halioglobus	-0.241783	8.21589	0.993857	0.319685	0.506222
34019|Liberibacter	0.164749	11.4333	0.98533	0.321766	0.507886
893|Desulfobulbus	0.262645	9.03796	0.984267	0.322027	0.507886
762296|Methylovulum	-0.207665	8.25756	0.965891	0.326578	0.513276
1156568|Methylovirgula	-0.223713	8.30984	0.965209	0.326749	0.513276
2172|Methanobrevibacter	-0.334602	9.69092	0.950595	0.330432	0.518028
2282740|Desulfallas	-0.301221	7.98184	0.945085	0.331835	0.519193
2129|Ureaplasma	-0.231944	8.79401	0.938306	0.333572	0.520876
33073|Zymobacter	-0.292969	7.5669	0.93033	0.335632	0.523054
231454|Dyella	0.233568	9.89989	0.92047	0.338201	0.526017
111500|Muricauda	0.286273	8.29494	0.909404	0.341117	0.529505
2690160|Limihaloglobus	-0.243841	7.49561	0.899622	0.343723	0.5325
1855416|Qipengyuania	-0.194691	9.47414	0.89484	0.345007	0.533438
203133|Propionimicrobium	0.180366	10.2232	0.884878	0.347702	0.536052
1676142|Wenzhouxiangella	0.297278	8.90139	0.883564	0.348059	0.536052
2005386|Arabia	-0.259889	6.57356	0.873709	0.350757	0.53846
2335|Thermotoga	0.266956	7.19403	0.871152	0.351462	0.53846
1078904|Candidatus Nitrosotalea	0.323037	5.26279	0.870381	0.351675	0.53846
1720323|Lessievirus	-0.210413	3.96264	0.853444	0.356396	0.544629
2661818|Saliniradius	0.260723	6.01333	0.844196	0.359012	0.547562
393005|Tamlana	0.324419	5.46001	0.832671	0.362307	0.55152
63742|Natrialba	-0.289078	5.66764	0.827543	0.363787	0.552704
407217|Aquitalea	0.312291	10.342	0.819445	0.366142	0.555209
1649480|Planctopirus	0.254955	9.78003	0.811219	0.368555	0.557794
2160|Methanobacterium	0.318191	8.03242	0.806565	0.36993	0.5588
1676125|Thermogutta	-0.209421	9.18599	0.786152	0.376047	0.565481
2051044|Tuwongella	-0.166826	10.4893	0.785016	0.376392	0.565481
1906657|Candidatus Doolittlea	0.247558	6.71232	0.784633	0.376508	0.565481
323620|Shinella	0.172045	9.75878	0.747958	0.387884	0.581456
1073531|Mycolicibacter	0.210398	9.59118	0.734834	0.392074	0.58662
134813|Natronorubrum	0.273079	6.75539	0.72914	0.393911	0.588251
2049301|Changchengzhania	-0.285416	6.22565	0.719699	0.396987	0.59172
1714270|Gammasphaerolipovirus	0.562447	3.84124	7.85793	0.401577	0.597431
1654931|Crenobacter	0.206026	7.89283	0.699979	0.403523	0.598242
2028344|Ereboglobus	-0.243718	8.69751	0.699623	0.403643	0.598242
455076|Rhodocytophaga	0.271137	10.6217	0.687656	0.407688	0.603102
1649454|Glaciihabitans	0.211992	9.8946	0.684413	0.408794	0.603605
1562|Desulfotomaculum	-0.214861	9.11557	0.676628	0.411469	0.606416
167639|Ilyobacter	0.238618	7.03021	0.657153	0.418274	0.615292
1543704|Niveispirillum	0.186144	9.4888	0.641793	0.42376	0.619799
363408|Nonlabens	0.202738	8.82224	0.640932	0.424071	0.619799
116071|Micropruina	-0.152045	11.1999	0.640384	0.424268	0.619799
1274351|Kroppenstedtia	-0.185477	9.31117	0.639777	0.424488	0.619799
946234|Flavonifractor	-0.268355	9.86811	0.622477	0.430814	0.627534
1565532|Rouxiella	-0.28022	7.86257	0.618945	0.432123	0.627534
377315|Mariprofundus	0.21553	10.7614	0.618798	0.432177	0.627534
398041|Flavisolibacter	-0.164763	13.0698	0.612906	0.434375	0.629564
1077265|Chthonomonas	-0.162393	9.91377	0.596139	0.440724	0.637591
47670|Lautropia	0.131344	13.8056	0.593571	0.441709	0.637843
204456|Gemmobacter	-0.181399	10.0006	0.589709	0.443196	0.638819
1551504|Candidatus Babela	0.286109	10.2949	0.568614	0.451461	0.649542
175304|Lentibacillus	-0.206466	10.9484	0.562922	0.453732	0.651619
2321113|Pseudoarcobacter	0.27202	7.25593	0.55386	0.457386	0.654835
162171|Magnetococcus	-0.222347	8.57796	0.553243	0.457636	0.654835
596707|Sinomonas	-0.179008	12.3655	0.550648	0.458692	0.654972
232244|Belliella	0.243961	7.85816	0.548923	0.459396	0.654972
2698688|Paraflavitalea	-0.162603	9.78792	0.540859	0.462709	0.658019
1882917|Pajaroellobacter	-0.147755	9.7835	0.539658	0.463206	0.658019
29331|Amphibacillus	-0.23749	9.26075	0.536653	0.464452	0.658602
83770|Succinivibrio	-0.177283	9.66127	0.524031	0.469748	0.664689
2735|Verrucomicrobium	-0.148995	10.9166	0.519454	0.471692	0.664689
89404|Glaciecola	0.194985	8.19929	0.516253	0.47306	0.664689
1085622|Propioniciclava	0.173527	11.0458	0.515882	0.473218	0.664689
649461|Lacibacter	-0.15715	10.7272	0.514891	0.473644	0.664689
379068|Galbibacter	0.222251	7.36595	0.514497	0.473812	0.664689
1649510|Variibacter	-0.136524	10.1953	0.506799	0.477136	0.668161
1195526|Gryllotalpicola	-0.176151	9.4236	0.501625	0.479392	0.670127
1649453|Gimesia	-0.226616	4.86298	0.494668	0.482453	0.672055
200903|Paraliobacillus	-0.206578	8.86393	0.494607	0.482479	0.672055
2717089|Massilistercora	0.234243	8.77187	0.486908	0.485904	0.67563
67575|Rheinheimera	-0.140484	13.1571	0.481439	0.488362	0.677027
242605|Luteibacter	0.211024	12.374	0.479283	0.489336	0.677027
1209988|Halopenitus	0.231385	6.24637	0.478944	0.48949	0.677027
263377|Salipiger	0.20617	7.9409	0.47625	0.490712	0.677435
1125|Microcystis	-0.211436	12.1173	0.474508	0.491506	0.677435
196082|Parascardovia	0.195696	7.12072	0.470931	0.493142	0.678501
832|Fibrobacter	-0.1478	8.72802	0.459858	0.498265	0.683467
159191|Nodularia	0.238167	8.92098	0.45847	0.498914	0.683467
79328|Chitinophaga	-0.099622	11.8356	0.457525	0.499356	0.683467
2222|Methanothrix	0.272406	9.30419	0.450617	0.50261	0.686726
288793|Salinimonas	0.191335	6.84107	0.433498	0.510833	0.696752
338321|Turneriella	0.1496	8.30235	0.431557	0.51178	0.696835
1287916|Euzebyella	0.211282	5.88039	0.429085	0.51299	0.697277
359407|Methylotenera	0.189317	11.3572	0.425552	0.514729	0.698434
1759331|Cnuibacter	-0.204839	6.93594	0.419704	0.51763	0.700291
1912215|Acidipropionibacterium	-0.0907203	11.8162	0.418648	0.518157	0.700291
326319|Dokdonia	0.175924	7.22258	0.417427	0.518767	0.700291
1763521|Paludisphaera	0.160139	9.61093	0.415579	0.519693	0.70034
466152|Singulisphaera	0.166316	11.2013	0.407464	0.523795	0.704661
82976|Buttiauxella	0.204166	6.52939	0.402443	0.526362	0.706682
109262|Halothiobacillus	0.177435	11.5683	0.401021	0.527093	0.706682
665568|Paraoerskovia	0.168285	8.96355	0.389557	0.533054	0.713458
933|Thiomicrospira	0.155007	9.16614	0.37887	0.538722	0.71982
1075397|Halolamina	0.193338	6.93911	0.374154	0.541258	0.721984
379899|Niabella	-0.116298	10.5178	0.370857	0.543045	0.723141
1004301|Flavihumibacter	-0.122975	9.96174	0.366729	0.545296	0.724429
1408194|Endomicrobium	-0.125979	8.8703	0.365713	0.545853	0.724429
127|Isosphaera	0.188174	10.0848	0.355773	0.551358	0.729811
155977|Acaryochloris	-0.15927	8.68854	0.355049	0.551763	0.729811
504090|Kushneria	0.163198	9.96479	0.347436	0.556056	0.734255
39773|Methylomicrobium	0.127981	8.63636	0.34039	0.560086	0.737467
568|Hafnia	-0.190068	6.19345	0.33991	0.560363	0.737467
334107|Conchiformibius	-0.160697	6.3604	0.331914	0.565009	0.741753
112987|Neochlamydia	0.135746	9.07211	0.33107	0.565504	0.741753
88723|Natrinema	-0.145227	8.54233	0.328908	0.566775	0.742184
50|Chondromyces	0.124064	9.71129	0.325575	0.568746	0.743527
387342|Halopiger	0.190125	6.76334	0.31988	0.572145	0.74673
1935188|Libanicoccus	-0.180019	6.17229	0.317898	0.573337	0.746895
1433993|Chryseolinea	-0.156995	10.5711	0.316518	0.57417	0.746895
574697|Butyricimonas	0.177598	7.97458	0.313584	0.575949	0.747758
376170|Haloplanus	0.170551	7.70028	0.31163	0.57714	0.747758
1190|Fischerella	-0.17232	10.6386	0.310741	0.577683	0.747758
79206|Desulfosporosinus	-0.167805	12.6983	0.305066	0.581176	0.751044
33024|Phascolarctobacterium	-0.193862	9.328	0.298987	0.584965	0.754058
60136|Sulfitobacter	-0.100483	10.0933	0.294126	0.588031	0.754058
154116|Georgenia	0.111455	12.1872	0.293733	0.588281	0.754058
511434|Candidatus Azobacteroides	-0.160402	8.58504	0.292495	0.589067	0.754058
105|Runella	0.144243	9.09404	0.29238	0.589141	0.754058
1230698|Marisediminicola	-0.139096	8.72579	0.290685	0.590222	0.754058
543311|Parvimonas	-0.155147	9.4822	0.289294	0.591112	0.754058
655352|Cohaesibacter	0.109436	7.75959	0.287823	0.592056	0.754058
158876|Yokenella	0.152479	7.071	0.287705	0.592132	0.754058
168808|Sneathia	-0.149778	7.05978	0.281406	0.596213	0.757349
366614|Haematobacter	-0.128834	10.9915	0.28075	0.596641	0.757349
908623|Euzebya	-0.132937	10.3412	0.27633	0.599544	0.759768
44260|Moorella	-0.116788	8.02293	0.274919	0.600477	0.759768
469322|Steroidobacter	-0.0935837	12.0483	0.27191	0.602476	0.760425
33001|Desulfurella	0.121099	7.80186	0.271233	0.602929	0.760425
1573534|Faecalitalea	-0.168898	9.43759	0.268582	0.604705	0.761445
881616|Herbiconiux	0.113626	8.66928	0.266368	0.606197	0.762104
41273|Tissierella	-0.14087	8.27438	0.254111	0.614602	0.771438
1920864|Rtpvirus	-0.196404	5.84839	0.24753	0.619221	0.775998
194195|Alysiella	-0.162214	8.03389	0.245589	0.620597	0.776487
29287|Natronococcus	-0.16565	8.82208	0.242051	0.623125	0.778411
45667|Halobacillus	-0.145448	8.74929	0.234336	0.628716	0.784151
1921784|Kiritimatiella	0.128544	7.53156	0.230627	0.631444	0.784501
208215|Parvularcula	0.129917	7.22069	0.229652	0.632166	0.784501
400947|Deefgea	0.165235	7.47007	0.229266	0.632452	0.784501
246861|Grimontia	0.165217	7.30054	0.228551	0.632983	0.784501
1647|Erysipelothrix	0.12324	10.0593	0.225793	0.635041	0.785814
2132|Spiroplasma	0.0830026	9.22066	0.220239	0.639233	0.789759
204286|Cobetia	-0.124386	7.54203	0.218382	0.640649	0.790267
235888|Salinibacterium	-0.0872361	10.1837	0.21558	0.642799	0.791679
1084558|Oceanicoccus	-0.147131	7.15373	0.210706	0.646581	0.793708
2675233|Metabacillus	0.123579	9.19775	0.210361	0.64685	0.793708
349742|Sedimenticola	0.128189	7.40073	0.209566	0.647472	0.793708
2251|Haloferax	-0.131453	7.25542	0.208105	0.64862	0.793878
203193|Halobiforma	-0.145122	6.34303	0.204623	0.651374	0.795696
458032|Chloracidobacterium	-0.0763582	10.6161	0.203678	0.652127	0.795696
1742992|Paenarthrobacter	0.142895	7.05575	0.195897	0.658404	0.802111
59282|Blastochloris	-0.0684535	10.1406	0.192912	0.660851	0.803849
1862|Dermatophilus	0.0978138	9.78503	0.184324	0.668022	0.811317
55079|Aneurinibacillus	-0.117461	9.92829	0.180845	0.670983	0.811988
146784|Bacteriovorax	-0.0980868	9.98713	0.180827	0.670999	0.811988
2237|Haloarcula	0.123362	8.71815	0.180044	0.67167	0.811988
1069494|Trueperella	0.0952945	9.6459	0.175819	0.675322	0.815032
387095|Maribius	0.147894	9.87191	0.17432	0.676629	0.815032
1706036|Gemmatirosa	0.0877263	12.1243	0.17356	0.677295	0.815032
1649463|Lentilitoribacter	0.131837	6.98367	0.171016	0.679535	0.81648
1204360|Siansivirga	-0.128368	6.61194	0.161171	0.688396	0.825865
1897649|Pistricoccus	-0.12382	8.45404	0.157694	0.691599	0.828445
196081|Scardovia	0.135462	6.71214	0.156457	0.692749	0.828562
261963|Kangiella	-0.0971972	8.30875	0.154892	0.694211	0.82905
2608728|Acidisarcina	0.0873533	10.1037	0.148066	0.70069	0.834613
1134403|Melioribacter	0.0807617	8.75027	0.147754	0.70099	0.834613
986106|Acidiferrobacter	0.105484	10.7412	0.143875	0.704753	0.836281
1508657|Ruminiclostridium	-0.136156	6.28299	0.143843	0.704785	0.836281
1524214|Vulgatibacter	-0.0885804	8.79752	0.143033	0.705579	0.836281
47|Archangium	-0.102286	9.80798	0.141028	0.707553	0.836632
1744881|Sulfuricaulis	0.110669	10.6393	0.139928	0.708643	0.836632
651456|Kosmotoga	0.0961651	6.79249	0.139505	0.709064	0.836632
1676651|Limnochorda	-0.104367	9.21073	0.136259	0.712315	0.839209
1988031|Candidatus Promineofilum	0.0864743	10.5849	0.125362	0.723564	0.851188
285107|Thioclava	0.122112	11.7874	0.122421	0.726693	0.853594
1505663|Erysipelatoclostridium	-0.0991919	8.27075	0.119523	0.729819	0.855987
1129704|Kyrpidia	-0.0727529	9.3071	0.116657	0.732952	0.858282
1861863|Sinimarinibacterium	0.0964198	12.4976	0.115746	0.733957	0.858282
2029|Kibdelosporangium	0.0825015	9.63769	0.112124	0.737996	0.861725
168934|Thalassospira	-0.0740312	9.23161	0.108811	0.741755	0.864832
351195|Salimicrobium	-0.106734	9.24627	0.106935	0.743912	0.866063
1161127|Murdochiella	0.0943355	8.47947	0.100015	0.752053	0.872769
83551|Parachlamydia	0.0985058	9.23619	0.0994246	0.752762	0.872769
104264|Cellulophaga	-0.082012	8.37713	0.0992283	0.752999	0.872769
64159|Desulfurobacterium	0.0998239	6.47974	0.0959279	0.757009	0.876126
1509243|Candidatus Nucleicultrix	0.0847638	10.5583	0.0931673	0.760421	0.878784
1434019|Mameliella	0.0894246	7.91281	0.0896788	0.764814	0.882564
253238|Ethanoligenens	-0.0779801	10.189	0.0865198	0.768873	0.885003
2147|Acholeplasma	-0.0537631	10.349	0.0860791	0.769445	0.885003
1582879|Ezakiella	0.0879905	9.20905	0.0854228	0.770301	0.885003
456492|Saccharibacillus	0.0855549	9.05342	0.0827996	0.773757	0.887678
1937972|Bernardetia	-0.0730115	7.53482	0.0788907	0.779019	0.891343
227388|Thermodesulfobium	-0.0699491	8.43326	0.0787455	0.779217	0.891343
65047|Mitsuaria	-0.0496521	10.3558	0.0765292	0.782267	0.892739
41201|Ewingella	-0.0857632	7.15355	0.0760901	0.782877	0.892739
670486|Dehalogenimonas	-0.0574547	8.74063	0.0737703	0.78613	0.892739
413435|Solimonas	-0.0669626	12.5147	0.0735146	0.786492	0.892739
104204|Streptomonospora	-0.0688438	9.01026	0.0730136	0.787203	0.892739
74385|Gracilibacillus	-0.0838325	7.41341	0.0729851	0.787243	0.892739
153265|Aequorivita	0.0816559	8.47634	0.0720496	0.788579	0.892966
869|Dichelobacter	-0.0897015	8.91367	0.0703965	0.790961	0.893985
1099|Pelodictyon	0.0756459	6.53348	0.0698533	0.79175	0.893985
1930845|Ndongobacter	-0.075131	8.01011	0.0651134	0.798782	0.900632
178898|Carboxydocella	-0.0715688	8.00831	0.0625778	0.802655	0.903705
644652|Gordonibacter	0.0668666	8.11456	0.0616785	0.804049	0.903981
1755829|Ichthyobacterium	0.0702079	7.3702	0.0586095	0.808889	0.906618
1518147|Wenyingzhuangia	0.070154	6.88589	0.0582371	0.809486	0.906618
93|Stella	0.0531898	12.437	0.05801	0.80985	0.906618
436357|Thalassococcus	-0.0713892	6.68245	0.0530394	0.818029	0.914473
745410|Gallaecimonas	-0.0603896	7.5415	0.0516675	0.820357	0.914923
1471399|Draconibacterium	0.0609957	7.75754	0.0514338	0.820757	0.914923
1594166|Oricola	-0.059902	7.65936	0.0473491	0.827905	0.919625
1623278|Bronvirus	0.33631	3.91582	1.67497	0.828575	0.919625
1331051|Candidatus Saccharimonas	0.0544223	9.9366	0.0467365	0.829004	0.919625
434|Acetobacter	-0.0336482	11.4281	0.0463794	0.829649	0.919625
1091|Chlorobium	-0.0554231	7.30719	0.0451688	0.831853	0.920373
459532|Terribacillus	0.0722598	8.63407	0.0447283	0.832662	0.920373
741759|Tomitella	0.044649	9.42266	0.0434268	0.835079	0.92066
228398|Streptacidiphilus	0.0454873	9.70239	0.0428379	0.836185	0.92066
1505664|Gottschalkia	0.0742967	9.73623	0.0427072	0.836432	0.92066
146|Spirochaeta	-0.0542776	9.74684	0.0396202	0.842373	0.92548
49277|Psychroserpens	0.0637135	5.16362	0.0388557	0.843882	0.92548
2678343|Halalkaliarchaeum	0.0656103	5.84883	0.0386257	0.844339	0.92548
2093783|Methylomusa	0.0557723	8.42952	0.0335548	0.854793	0.935636
1433402|Glycocaulis	0.0412049	10.2243	0.0316707	0.858884	0.937317
61434|Dehalococcoides	-0.0426865	11.8291	0.0316	0.85904	0.937317
2023|Thermoactinomyces	-0.0429568	9.69281	0.031101	0.860146	0.937317
335405|Sphingosinicella	0.0290175	11.1469	0.030677	0.861093	0.937317
1804663|Haematospirillum	-0.0397849	9.70516	0.0299032	0.862838	0.93792
754249|Luteimicrobium	0.0470991	9.47545	0.0258344	0.872424	0.947032
233189|Anaerolinea	-0.0436879	10.8842	0.024695	0.875246	0.948786
472825|Candidatus Purcelliella	0.0440207	7.54334	0.0229963	0.879579	0.952171
1434010|Jatrophihabitans	-0.0456741	7.4303	0.0215422	0.88342	0.954383
31988|Aminobacter	-0.0252667	10.1388	0.0210612	0.884719	0.954383
947525|Miniimonas	-0.0330456	10.0995	0.0208627	0.88526	0.954383
112040|Zobellia	-0.0513804	6.82005	0.0195354	0.888946	0.956846
397864|Barnesiella	-0.0430514	7.93776	0.0191722	0.889976	0.956846
1392389|Intestinimonas	0.290276	4.36603	0.709805	0.89628	0.962309
256319|Chlorobaculum	0.0314694	7.10602	0.015832	0.899963	0.964947
190323|Plantibacter	-0.0254656	9.71401	0.0152084	0.901943	0.965753
1769012|Arachidicoccus	0.0213556	11.4595	0.0146929	0.903611	0.96601
323413|Dokdonella	-0.0236565	8.94811	0.0143802	0.904637	0.96601
697025|Hoyosella	-0.0274252	9.31904	0.0137851	0.906622	0.966817
261827|Algibacter	0.0313515	7.04166	0.0122964	0.911786	0.97092
264688|Trichormus	-0.0318801	6.66845	0.0117134	0.913894	0.97092
59739|Flammeovirga	0.0257166	8.18941	0.0113074	0.915394	0.97092
444459|Flagellimonas	-0.0313596	5.87742	0.0112787	0.915501	0.97092
58050|Moritella	-0.027503	8.14428	0.0107728	0.917411	0.97092
929509|Solitalea	0.0266112	8.58316	0.0106525	0.917871	0.97092
1970191|Salinivirga	0.0279207	7.9651	0.009823	0.921123	0.973052
1221880|Psychrobacillus	-0.0256142	9.18453	0.00900294	0.924477	0.974623
146918|Salinibacter	-0.0214359	8.16428	0.00861451	0.926119	0.974623
1484898|Methyloceanibacter	-0.0186631	8.56688	0.00856635	0.926325	0.974623
2173039|Arcticibacterium	-0.0266153	7.34248	0.00798964	0.928842	0.974729
34093|Simkania	0.0267786	8.16057	0.00797583	0.928903	0.974729
46239|Mesoplasma	0.0244798	6.82746	0.00766203	0.930312	0.974908
69474|Orientia	-0.0169901	8.86249	0.00715912	0.932632	0.976039
1649474|Nibribacter	0.0280674	8.47068	0.00680111	0.934334	0.976522
1348508|Roseimicrobium	0.01805	9.2654	0.00559179	0.940446	0.981606
83681|Nonomuraea	0.013547	10.419	0.00532178	0.941899	0.98182
2055880|Pseudescherichia	0.0233348	6.63352	0.00495175	0.943952	0.982659
1485594|Methyloligella	-0.0154986	8.08435	0.00439158	0.947212	0.983288
388463|Edaphobacter	0.0171156	8.14541	0.003935	0.950028	0.983288
1780190|Izhakiella	0.0184772	7.37915	0.00376729	0.951103	0.983288
2375|Sporomusa	0.0232293	12.1279	0.00358199	0.952319	0.983288
1434018|Lysinimonas	0.0125789	9.60283	0.00356568	0.952428	0.983288
93682|Roseivivax	0.0149873	8.83902	0.00317565	0.955102	0.983288
1911573|Haloprofundus	-0.0173955	6.30686	0.00284107	0.957531	0.983288
2239|Halobacterium	-0.013953	8.02658	0.00271562	0.958478	0.983288
1648508|Ciceribacter	-0.0131019	7.83478	0.00257669	0.959553	0.983288
1205|Trichodesmium	0.0249078	11.9114	0.00247541	0.960355	0.983288
1344552|Noviherbaspirillum	-0.0126092	10.3627	0.00245852	0.960491	0.983288
1433997|Diaminobutyricimonas	0.0109464	8.9874	0.00226902	0.962043	0.983288
1521255|Candidatus Paracaedibacter	-0.0115853	8.91476	0.002194	0.962675	0.983288
1652133|Halobacteriovorax	0.0111582	9.90923	0.00212888	0.963233	0.983288
458839|Actinotalea	-0.0108066	11.4046	0.00212139	0.963297	0.983288
843|Wolinella	0.0104603	5.56716	0.00157171	0.968405	0.986234
334202|Mupapillomavirus	0.0920884	3.96617	0.00148746	0.969263	0.986234
51366|Salinivibrio	-0.0111723	6.613	0.00142233	0.969943	0.986234
235572|Candidatus Portiera	0.0104016	9.92701	0.00116613	0.972784	0.987846
39948|Dialister	-0.00723226	9.76648	0.000955906	0.975358	0.988418
2077|Sporolactobacillus	-0.00850098	8.30958	0.000917395	0.975859	0.988418
2680004|Protaetiibacter	0.00559529	8.94019	0.00070212	0.97888	0.990204
1542963|Halapricum	-0.00705742	5.96328	0.000576397	0.980864	0.990937
320496|Neoasaia	0.00693517	6.67342	0.000429961	0.983472	0.992298
2483368|Sedimentisphaera	-0.00488617	7.70276	0.000260607	0.987132	0.994715
278993|Thermincola	-0.00329892	8.07308	0.000201114	0.988696	0.995017
2233801|Ahniella	-0.0028823	8.26409	0.000151922	0.990175	0.995233
2422|Fervidobacterium	-0.0035333	8.57095	8.58463e-05	0.992614	0.996412
1827478|Youhaiella	0.00166257	7.85513	4.28882e-05	0.99478	0.997314
225143|Oceanisphaera	0.00111196	9.21548	1.34236e-05	0.997079	0.998348
1740|Thermodesulfobacterium	0.000227695	8.28611	1.01784e-06	0.999196	0.999196

## Sheet: bowtie2 cancer vs. NC
genus id	logFC	logCPM	F	PValue	FDR
157226|Jeotgalibacillus	-7.36188	16.9141	206.234	2.13799e-35	1.6826e-32
1055323|Aeribacillus	-4.05254	13.5472	185.05	1.11827e-32	4.40038e-30
56106|Cylindrospermum	-3.41887	7.56813	112.486	2.64209e-22	6.93108e-20
1205|Trichodesmium	-2.63261	7.14584	110.791	4.86638e-22	9.5746e-20
1649|Kurthia	-3.08031	9.9582	110.067	6.32257e-22	9.95173e-20
596707|Sinomonas	-2.57269	11.2545	104.492	4.82372e-21	6.32712e-19
2207|Methanosarcina	-3.83823	8.83702	102.26	1.09765e-20	1.23407e-18
1729679|Faecalibaculum	-3.55615	9.87936	97.9208	5.50452e-20	5.41507e-18
267849|Nitrincola	-3.30292	9.66048	96.1702	1.06076e-19	9.2758e-18
434|Acetobacter	-2.17358	12.4413	95.3077	1.46723e-19	1.15471e-17
1511648|Defluviitoga	-2.44927	7.29521	87.2895	3.10845e-18	2.22395e-16
898|Desulfomicrobium	-3.08899	9.01539	81.192	3.3221e-17	2.17875e-15
10375|Lymphocryptovirus	4.42578	7.94067	76.599	2.03501e-16	1.23196e-14
2051044|Tuwongella	-2.53087	7.21901	75.7823	2.8162e-16	1.5831e-14
1861863|Sinimarinibacterium	-2.41003	7.25172	73.7469	6.35031e-16	3.3318e-14
2220|Methanolobus	-2.25987	7.1106	72.4358	1.07496e-15	5.28748e-14
538|Eikenella	-2.14738	11.0454	64.9628	2.24927e-14	1.04128e-12
2422|Fervidobacterium	-2.56814	8.25836	63.2183	4.62111e-14	2.02045e-12
46254|Oenococcus	-1.92371	9.95215	60.2529	1.58596e-13	6.5692e-12
2679910|Intestinibaculum	-2.54696	8.11779	59.9376	1.80943e-13	7.12012e-12
169133|Citricoccus	-2.051	11.0529	55.2642	1.29669e-12	4.8595e-11
46352|Agrococcus	-1.50018	14.0402	54.6171	1.70728e-12	6.1074e-11
1906945|Parageobacillus	-2.44878	13.4772	53.8572	2.36e-12	8.07529e-11
187217|Tunavirus	-1.82925	6.98902	120.138	1.02649e-11	3.26655e-10
1918540|Muribaculum	-2.33544	9.26845	50.4058	1.03766e-11	3.26655e-10
1184606|Austwickia	-1.78579	11.1122	48.7579	2.11734e-11	6.40902e-10
39948|Dialister	-1.98144	9.12653	48.6296	2.23853e-11	6.5249e-10
1230698|Marisediminicola	-1.70784	7.60852	48.3926	2.48126e-11	6.97412e-10
320496|Neoasaia	-1.77199	9.04234	45.651	8.21357e-11	2.22899e-09
370735|Zhihengliuella	-1.82254	8.99087	44.242	1.52638e-10	4.00421e-09
1295327|Croceicoccus	-1.1716	12.3003	43.4023	2.21147e-10	5.61428e-09
56358|Sandaracinobacter	-1.87571	7.48926	43.2809	2.33352e-10	5.739e-09
1911573|Haloprofundus	2.97677	7.71644	43.1182	2.50771e-10	5.98052e-09
86795|Marmoricola	-1.38072	13.7431	42.76	2.9389e-10	6.66328e-09
153497|Kozakia	-1.49535	9.8945	42.7242	2.98586e-10	6.66328e-09
2282740|Desulfallas	2.81547	7.62468	42.6437	3.09442e-10	6.66328e-09
114185|Candidatus Carsonella	-1.84038	8.08601	42.6017	3.15248e-10	6.66328e-09
2740557|Pauljensenia	-2.16486	9.3271	42.5558	3.21734e-10	6.66328e-09
10509|Mastadenovirus	2.18212	7.20873	53.9301	3.38002e-10	6.82071e-09
687331|Alphatorquevirus	5.69814	14.2334	41.964	4.18434e-10	8.2327e-09
687332|Betatorquevirus	3.44919	8.14333	40.9274	6.63928e-10	1.27442e-08
40272|Roseolovirus	4.90487	10.7349	40.1965	9.20328e-10	1.72452e-08
204286|Cobetia	-1.96322	9.67041	39.9548	1.02545e-09	1.87682e-08
41273|Tissierella	-1.95691	7.52891	39.499	1.25786e-09	2.24986e-08
65496|Actinoalloteichus	-1.8012	11.8192	39.3822	1.32552e-09	2.31819e-08
191769|Marinilactibacillus	-2.01167	10.129	38.3447	2.11338e-09	3.61572e-08
67572|Psychromonas	-2.16333	8.42662	37.2519	3.46108e-09	5.79547e-08
648802|Rummeliibacillus	-1.68997	9.75691	36.5989	4.65206e-09	7.62744e-08
191303|Turicibacter	-2.18483	12.6025	36.5484	4.7599e-09	7.64498e-08
1779136|Bradymonas	-1.89488	9.1057	35.2221	8.69968e-09	1.36933e-07
649461|Lacibacter	-1.74202	7.72096	34.7455	1.08135e-08	1.66867e-07
168808|Sneathia	-1.78395	8.58873	34.4543	1.23526e-08	1.86951e-07
1911577|Oryzomicrobium	-1.64509	8.45654	34.2522	1.35489e-08	2.01189e-07
33951|Acetobacterium	-2.09348	9.35556	33.8522	1.62723e-08	2.37154e-07
1742992|Paenarthrobacter	-1.30605	11.8939	32.2572	3.38811e-08	4.84808e-07
76831|Myroides	-1.4499	10.9343	31.6761	4.43101e-08	6.22715e-07
367298|Phycicoccus	-1.43768	11.2445	31.5303	4.74011e-08	6.53697e-07
200903|Paraliobacillus	-1.66869	8.02814	31.4953	4.81759e-08	6.53697e-07
1849828|Paeniclostridium	-2.11143	12.2895	31.4396	4.94324e-08	6.59378e-07
47251|Leptolyngbya	-1.7485	10.6173	31.0758	5.85038e-08	7.56874e-07
28895|Thermoanaerobacterium	-1.86332	12.4325	31.0699	5.8665e-08	7.56874e-07
929509|Solitalea	-1.3716	7.08036	30.4655	7.76592e-08	9.85771e-07
1193324|Alkalitalea	3.11725	10.9411	29.4193	1.26412e-07	1.57914e-06
91914|Asaia	-1.27625	8.91144	28.2738	2.16045e-07	2.65667e-06
984996|Mobilicoccus	-1.4925	11.6136	27.4632	3.16177e-07	3.82817e-06
2005363|Auricoccus	-1.52049	12.7661	26.5915	4.76933e-07	5.68706e-06
947567|Litoreibacter	-1.50094	10.3517	26.4256	5.15849e-07	6.0593e-06
2600304|Baekduia	-1.08178	7.01154	29.0613	5.46381e-07	6.32356e-06
44471|Microcoleus	2.31889	8.13226	25.5741	7.72144e-07	8.80533e-06
44258|Caloramator	-1.6128	8.61144	25.5442	7.83193e-07	8.80533e-06
1485594|Methyloligella	-1.32502	8.26508	25.3514	8.58309e-07	9.51393e-06
1616789|Salinispira	1.91005	7.53729	25.2134	9.16464e-07	1.00175e-05
33877|Agromyces	-1.1224	11.6844	24.9729	1.02756e-06	1.09478e-05
568|Hafnia	-1.3281	9.22616	24.9692	1.02939e-06	1.09478e-05
141948|Thermomonas	-1.22113	10.8124	24.5362	1.26521e-06	1.32762e-05
76634|Mycetocola	-1.38685	13.2094	24.0775	1.57505e-06	1.631e-05
1980514|Halodesulfurarchaeum	-1.03411	7.0309	24.0444	1.60016e-06	1.63549e-05
2036021|Agarilytica	2.64983	10.5911	23.8785	1.73229e-06	1.74784e-05
2029|Kibdelosporangium	-1.41868	10.0027	23.7309	1.85903e-06	1.85197e-05
232244|Belliella	-1.53256	8.18748	23.6033	1.9762e-06	1.94408e-05
332246|Halalkalicoccus	-1.77811	10.0418	23.1569	2.44801e-06	2.3785e-05
687333|Gammatorquevirus	2.50861	8.31131	23.1181	2.49395e-06	2.39358e-05
157920|Cellulosimicrobium	-1.06481	12.1256	22.5126	3.33695e-06	3.16408e-05
682522|Ilumatobacter	-1.47866	7.18348	29.7684	3.7326e-06	3.48182e-05
68|Lysobacter	-0.995895	13.6466	22.2646	3.76054e-06	3.48182e-05
1940138|Candidatus Walczuchella	-1.34857	7.2761	22.1944	3.89015e-06	3.55994e-05
2661818|Saliniradius	2.05821	8.85721	22.1274	4.01796e-06	3.60167e-05
1847725|Lawsonella	-1.19075	16.4269	22.1226	4.02728e-06	3.60167e-05
53392|Thiodictyon	2.3366	9.96251	22.0063	4.25976e-06	3.75253e-05
413435|Solimonas	-1.21666	10.543	21.991	4.29133e-06	3.75253e-05
1862|Dermatophilus	-1.26867	10.0977	21.8423	4.61086e-06	3.98764e-05
82982|Obesumbacterium	-1.18001	7.90442	21.6056	5.17013e-06	4.42271e-05
316625|Saccharophagus	0.541288	6.94781	21.2373	6.17957e-06	5.22938e-05
159191|Nodularia	-1.4545	8.27546	21.0218	6.8603e-06	5.74368e-05
51514|Dehalobacterium	-1.26864	7.66831	20.8329	7.51913e-06	6.229e-05
146|Spirochaeta	2.16681	9.57866	20.6645	8.16035e-06	6.68978e-05
36853|Desulfitobacterium	-1.37264	8.7011	20.5969	8.43321e-06	6.8422e-05
265570|Sulfurovum	1.70389	7.75928	20.5468	8.64122e-06	6.93926e-05
2675231|Mesobacillus	-1.41487	12.2848	20.5259	8.72919e-06	6.93926e-05
2420|Thermosipho	-1.23122	7.27822	20.4879	8.89212e-06	6.9981e-05
1055688|Sandaracinus	-1.17615	11.5099	20.4054	9.25666e-06	7.15015e-05
1186|Calothrix	-0.9994	6.96485	36.0554	9.26703e-06	7.15015e-05
57739|Vogesella	-1.41927	9.10533	20.3653	9.43921e-06	7.21229e-05
171003|Caloranaerobacter	2.26966	9.12085	19.9003	1.18407e-05	8.96022e-05
1849822|Paraclostridium	-1.25038	8.15302	19.785	1.25265e-05	9.36545e-05
1826864|Candidatus Nitrosocosmicus	-1.38658	10.1166	19.7707	1.26142e-05	9.36545e-05
1209988|Halopenitus	-1.18377	7.29111	19.2648	1.61562e-05	0.000118831
1335745|Spiribacter	2.08739	9.80721	19.1634	1.69796e-05	0.000123731
1849|Actinopolyspora	-1.9302	13.1934	19.0888	1.76117e-05	0.000127159
2675229|Peribacillus	-1.14711	11.7192	18.6383	2.19713e-05	0.000157194
33886|Rathayibacter	-0.932537	11.5297	18.5871	2.25305e-05	0.000159743
125287|Ornithinimicrobium	-1.21392	11.7513	18.437	2.42576e-05	0.000170453
907364|Phytohabitans	-1.18772	7.22608	18.3862	2.48719e-05	0.000173223
168934|Thalassospira	-0.834542	10.0959	18.323	2.5658e-05	0.00017713
1508657|Ruminiclostridium	-1.23239	7.2327	18.1877	2.74265e-05	0.000187693
29526|Syntrophobacter	0.997316	7.04369	18.1029	2.85971e-05	0.000194016
472568|Devriesea	-1.1077	9.17575	17.9607	3.06743e-05	0.000206331
1331730|Chryseoglobus	-0.986754	7.26648	17.7947	3.32945e-05	0.000222057
307628|Petrimonas	-1.48251	9.13069	17.7479	3.40736e-05	0.000225344
153135|Gammaretrovirus	1.68865	7.41902	17.7178	3.45834e-05	0.000226809
99|Ancylobacter	-0.851713	9.86161	17.4469	3.95415e-05	0.000257183
469322|Steroidobacter	-0.912808	13.6165	17.1965	4.47647e-05	0.000288769
397864|Barnesiella	-0.840904	6.93916	53.6896	4.57406e-05	0.000292665
1160973|Auritidibacter	-1.07644	7.39171	17.0825	4.73675e-05	0.000298968
83681|Nonomuraea	-1.09566	9.03911	17.0775	4.74854e-05	0.000298968
162289|Peptoniphilus	-1.0482	13.7988	17.0101	4.90989e-05	0.000306673
70774|Hydrogenophilus	-1.16559	12.385	16.9139	5.15e-05	0.000319138
1137960|Allokutzneria	-1.09976	11.0879	16.7757	5.51609e-05	0.000339153
29393|Dolosigranulum	-1.12726	13.3368	16.7297	5.64373e-05	0.000344311
1204360|Siansivirga	1.00744	6.9901	30.1092	6.52687e-05	0.000395127
1649459|Hungatella	-1.29519	8.26365	16.3502	6.81695e-05	0.000409537
2237|Haloarcula	-1.0322	7.14012	18.0242	7.31208e-05	0.000435594
543311|Parvimonas	-1.32084	9.50024	16.1961	7.36137e-05	0.000435594
142577|Prauserella	-1.18147	10.7431	16.1657	7.47385e-05	0.000438949
349742|Sedimenticola	1.63288	9.61451	16.1427	7.56002e-05	0.000440721
2093|Mycoplasma	1.81277	10.0593	16.0266	8.01118e-05	0.000463588
1607807|Candidatus Methanoplasma	-1.3806	7.52233	15.8115	8.92017e-05	0.000512422
577309|Paraprevotella	-1.20087	7.71551	15.7587	9.15879e-05	0.000522317
196081|Scardovia	-0.969714	7.18808	15.6977	9.44261e-05	0.000534628
1569|Sporosarcina	-1.33035	14.2565	15.6819	9.51742e-05	0.000535015
875170|Celeribacter	-0.899725	11.1263	15.5246	0.000102975	0.000574759
939|Hydrogenobacter	-1.33324	8.00155	15.4605	0.000106335	0.000589333
134813|Natronorubrum	-1.16783	8.09128	15.1186	0.000126235	0.000694732
190323|Plantibacter	-0.845241	10.8562	15.0394	0.000131363	0.000717935
203193|Halobiforma	-1.11956	7.45882	14.9053	0.000140521	0.000758795
93682|Roseivivax	-0.977968	11.0578	14.9019	0.000140768	0.000758795
1085622|Propioniciclava	-1.0184	7.27074	14.8802	0.00014231	0.000761892
1759331|Cnuibacter	-0.886554	9.99248	14.7237	0.000153974	0.00081877
1348508|Roseimicrobium	-1.24388	7.29511	14.7021	0.000155656	0.000822156
28050|Lachnospira	-1.12463	7.96454	14.6784	0.000157526	0.000826489
105|Runella	1.46706	7.59982	14.4184	0.000179601	0.000936065
347533|Zobellella	1.67947	10.2258	14.3953	0.000181708	0.000940817
398041|Flavisolibacter	-0.9679	13.049	14.2131	0.000199226	0.00102478
1007|Saprospira	0.752326	6.97782	22.1407	0.000204172	0.00103735
1663717|Herbinix	-1.19413	11.1348	14.1548	0.000205185	0.00103735
76833|Actinobaculum	1.84503	11.0799	14.1506	0.000205624	0.00103735
171163|Halosimplex	-0.994865	7.12627	16.2609	0.000226237	0.00113407
1941236|Gemykibivirus	1.53271	9.68923	13.8775	0.000236106	0.00117605
48073|Microbulbifer	1.44523	10.974	13.8434	0.000240226	0.00118905
162491|Oerskovia	-0.942004	11.1191	13.8049	0.000244961	0.00120323
59734|Empedobacter	-1.06573	11.6629	13.7953	0.00024615	0.00120323
43356|Kutzneria	-1.01817	7.34929	13.7242	0.000255185	0.0012397
28228|Colwellia	-1.18948	10.6166	13.6507	0.000264892	0.00127896
280472|Aquiflexum	0.848812	7.07355	13.6067	0.000270864	0.00129982
651660|Paenisporosarcina	-1.32063	10.6977	13.5491	0.000278915	0.00133034
497726|Nitrososphaera	-1.15463	8.35952	13.5098	0.000284532	0.00134318
1649478|Pelolinea	1.56947	8.33855	13.5064	0.000285021	0.00134318
46205|Pseudobutyrivibrio	-0.878305	7.03225	18.3184	0.000303503	0.00142176
2603324|Acidibrevibacterium	-0.960975	9.89418	13.2949	0.000317391	0.00147803
542837|Zindervirus	-1.15328	7.2793	13.2518	0.000324426	0.0015019
2058174|Antarcticibacterium	1.57765	7.82574	13.2212	0.000329522	0.00151657
2675230|Cytobacillus	-1.21688	14.0732	13.0324	0.000362799	0.00166002
204456|Gemmobacter	-0.868597	10.0033	12.9696	0.000374609	0.00170415
2233801|Ahniella	-0.944151	9.2604	12.938	0.000380709	0.00171673
1195526|Gryllotalpicola	-0.870864	9.76906	12.9327	0.000381739	0.00171673
44|Melittangium	1.89063	9.83219	12.8339	0.000401491	0.0017953
294702|Proteiniphilum	-1.19828	8.39929	12.7743	0.0004139	0.00184034
1769729|Hathewaya	-1.01785	7.39413	12.7389	0.000421461	0.00184685
1926259|Pseudactinotalea	-1.11267	8.15914	12.735	0.000422304	0.00184685
1897649|Pistricoccus	-1.30111	9.09965	12.7345	0.000422405	0.00184685
85076|Marichromatium	1.41703	9.05149	12.6321	0.000445106	0.00193535
45669|Salinicoccus	-1.22461	14.6864	12.6203	0.000447819	0.00193645
762296|Methylovulum	-1.07217	8.13832	12.6035	0.000451687	0.0019425
1623304|Moineauvirus	-0.610337	6.93788	38.7724	0.000456678	0.00195329
1754|Thermoanaerobacter	-1.01781	7.80794	12.5678	0.000459999	0.00195686
2239|Halobacterium	-1.10238	8.07767	12.4054	0.000499919	0.00211525
428711|Jonquetella	-1.02475	7.26339	12.3222	0.00052169	0.00219556
896|Desulfococcus	1.08377	7.80885	12.1313	0.000575416	0.00240879
1935188|Libanicoccus	-1.09479	7.24017	14.7387	0.000597912	0.00248382
1433997|Diaminobutyricimonas	-0.978622	7.54588	12.051	0.000599651	0.00248382
1221880|Psychrobacillus	-1.10689	10.6174	12.0286	0.000606596	0.00249943
1649453|Gimesia	-0.922896	8.20275	12.013	0.000611458	0.00250634
2055880|Pseudescherichia	-1.13189	7.78693	11.9924	0.000617986	0.00251998
2282523|Methylorubrum	-1.65372	19.4452	11.9767	0.000623007	0.00252736
1649468|Melaminivora	-0.720993	10.6333	11.9502	0.000631562	0.00254892
208215|Parvularcula	-0.913516	7.90091	11.7313	0.000706924	0.00283852
1720323|Lessievirus	-0.871191	7.1037	11.5917	0.000759679	0.00303486
228398|Streptacidiphilus	-0.772305	9.61132	11.4596	0.000813331	0.00323279
1740|Thermodesulfobacterium	-0.797979	7.15976	11.3964	0.000840344	0.00331257
186831|Acetoanaerobium	-1.31555	9.85657	11.393	0.000841821	0.00331257
227388|Thermodesulfobium	0.93276	7.16059	11.3093	0.00087904	0.00344181
360528|Pelagibaca	-1.05369	8.01804	11.271	0.000896629	0.0034933
2732587|Candidatus Vesicomyosocius	0.744535	7.06808	11.1591	0.000950123	0.00368348
116071|Micropruina	-0.942626	12.2966	11.0499	0.00100548	0.00387899
1573534|Faecalitalea	-1.07017	7.38511	10.9943	0.00103488	0.00397295
233189|Anaerolinea	1.23722	7.78235	10.9568	0.00105523	0.0040314
2425|Teredinibacter	1.3348	8.42167	10.906	0.00108344	0.00411915
263377|Salipiger	-0.930464	8.91307	10.8728	0.00110229	0.00416074
1912215|Acidipropionibacterium	-0.70859	11.1159	10.8681	0.00110495	0.00416074
1078904|Candidatus Nitrosotalea	-0.899478	6.97482	28.1665	0.00115565	0.00433094
154116|Georgenia	-0.968661	10.5485	10.7681	0.00116391	0.00434123
2316020|Mediterraneibacter	-0.945311	10.6829	10.7241	0.00119088	0.00442086
2172|Methanobrevibacter	-1.31199	10.8386	10.7128	0.00119787	0.00442593
2689587|Suicoccus	-1.22553	12.211	10.6848	0.00121548	0.00447
2489367|Candidatus Cyclonatronum	-1.01902	8.94936	10.6071	0.00126562	0.00463275
2685905|Salicibibacter	1.77072	11.3569	10.5678	0.00129181	0.00470672
67575|Rheinheimera	-0.84311	10.818	10.5008	0.00133774	0.00485163
1649454|Glaciihabitans	-0.824078	7.38994	10.4503	0.00137341	0.00495812
76632|Thermobacillus	-0.961837	7.2321	10.3819	0.00142333	0.00511491
28250|Ornithobacterium	-0.853297	7.29047	10.3701	0.0014321	0.00512302
10405|Orthohepadnavirus	3.02281	16.499	10.3193	0.00147064	0.00523707
2202|Methanospirillum	0.980154	7.18865	10.2965	0.00148828	0.00527602
246875|Algoriphagus	-0.911996	10.6691	10.269	0.00150979	0.00532827
75905|Thermocrinis	-1.0846	7.90007	10.2506	0.00152437	0.00535571
1099|Pelodictyon	-0.932957	7.41162	10.1418	0.00161361	0.00564405
74032|Antarctobacter	1.26239	8.46109	10.0605	0.00168381	0.00586352
2698688|Paraflavitalea	-0.772989	11.0316	10.0317	0.00170935	0.00592624
511434|Candidatus Azobacteroides	-0.830835	7.19399	9.99884	0.00173905	0.00600278
69578|Cryobacterium	-0.679126	11.3516	9.98286	0.00175368	0.00602684
293431|Haloquadratum	-0.58765	6.93697	30.7467	0.00184194	0.00630263
387095|Maribius	-0.848604	9.7409	9.85992	0.00187048	0.00637258
1572860|Hartmannibacter	-0.710748	9.56513	9.77873	0.00195193	0.00662142
82976|Buttiauxella	-0.930109	8.05955	9.70577	0.00202821	0.00680027
1677050|Novibacillus	-0.890674	8.27948	9.70384	0.00203028	0.00680027
89966|Hymenobacter	-0.920582	13.3361	9.70356	0.00203058	0.00680027
1964366|Nissabacter	-1.5225	10.2023	9.69474	0.00204001	0.00680291
1649486|Rhizorhabdus	-0.614733	10.7765	9.64327	0.00209598	0.00696007
830|Butyrivibrio	-0.902602	7.81287	9.61984	0.00212197	0.00701676
1649510|Variibacter	-0.679684	10.2514	9.59957	0.00214473	0.00706234
295595|Candidatus Hepatoplasma	0.908614	7.25611	9.56438	0.00218482	0.00716439
1331737|Haloactinobacterium	-0.782611	10.2115	9.55371	0.00219713	0.00717486
61434|Dehalococcoides	-0.995867	9.72941	9.30879	0.00249999	0.00813013
233191|Caldilinea	-0.713419	6.9429	25.7002	0.00251974	0.00816065
1434032|Pontimonas	-0.680207	8.57319	9.27485	0.0025452	0.00820932
2023|Thermoactinomyces	-0.98966	8.56773	9.14603	0.00272454	0.00875189
1902583|Candidatus Desulfofervidus	0.779436	7.21376	9.10145	0.00278956	0.00892432
2697|Heliobacterium	-0.774735	6.96462	25.637	0.00304451	0.00970053
745364|Luteipulveratus	-0.688606	11.9869	8.67342	0.00350079	0.0111094
379899|Niabella	-0.689352	9.92522	8.63544	0.00357226	0.0112906
191028|Leisingera	-0.7589	7.08784	11.6386	0.00360468	0.0113475
2680004|Protaetiibacter	-0.694647	11.5491	8.57697	0.0036852	0.0115548
2700084|Urechidicola	-0.886959	8.10502	8.55955	0.00371956	0.0116162
60846|Halogeometricum	0.638076	7.04067	8.54801	0.0037425	0.0116417
1287916|Euzebyella	0.642867	7.07077	8.50359	0.00383214	0.0118736
2071|Saccharothrix	-0.84714	10.0016	8.42929	0.00398706	0.0123052
2129|Ureaplasma	0.990721	7.44472	8.4191	0.0040088	0.0123239
46239|Mesoplasma	-0.733856	7.31908	8.32339	0.004219	0.0129197
447020|Adlercreutzia	-0.871629	7.33922	8.2991	0.00427412	0.0130377
353799|Halostagnicola	-0.889578	7.46869	8.27511	0.0043293	0.013155
2608728|Acidisarcina	1.14283	9.12814	8.18161	0.00455135	0.0137766
1392389|Intestinimonas	-1.03501	11.021	8.06794	0.00483713	0.0145855
366614|Haematobacter	-0.818865	12.4994	8.02771	0.00494262	0.0148467
472825|Candidatus Purcelliella	-0.780265	7.26414	8.0116	0.00498551	0.0149037
1623298|Phietavirus	-0.978003	7.68202	8.00639	0.00499947	0.0149037
1988031|Candidatus Promineofilum	-1.02579	10.2633	7.93944	0.00518243	0.0153908
278993|Thermincola	-0.731591	7.16526	7.84912	0.00544017	0.0160697
1537406|Bacterioplanes	-1.05742	9.2519	7.84513	0.00545186	0.0160697
388463|Edaphobacter	0.830105	7.3508	7.81039	0.00555473	0.0163118
46238|Entomoplasma	-0.573038	7.0414	7.71886	0.0058353	0.017072
665568|Paraoerskovia	-0.711399	11.4681	7.68567	0.00594059	0.0173157
29287|Natronococcus	-0.999289	9.27812	7.65298	0.00604622	0.0175586
117156|Actinopolymorpha	-0.682987	10.0608	7.60911	0.00619102	0.017901
444459|Flagellimonas	-0.674551	7.15346	7.60356	0.00620961	0.017901
2077|Sporolactobacillus	-0.854909	7.86892	7.59333	0.00624395	0.0179343
885864|Jeongeupia	0.682916	7.04523	9.81604	0.00630828	0.0180532
673534|Plantactinospora	-0.733404	7.3957	7.54908	0.00639493	0.0182348
387342|Halopiger	-0.854964	7.99486	7.504	0.0065526	0.018617
377315|Mariprofundus	0.805144	7.93984	7.32429	0.00722188	0.0204447
1649279|Epibacterium	-0.668359	9.89353	7.2944	0.00733983	0.0207041
2147|Acholeplasma	1.36018	10.4196	7.2749	0.00741786	0.0208495
375928|Natranaerobius	-0.718611	7.2285	7.187	0.00778028	0.0217903
2039240|Anaerotignum	-0.563469	7.03818	7.14287	0.00796903	0.0222398
504090|Kushneria	-0.754029	10.3803	7.12162	0.00806164	0.0224188
1004301|Flavihumibacter	-0.639137	10.9938	7.1141	0.00809467	0.0224313
1299429|Yuavirus	0.556121	7.04511	7.08918	0.00820507	0.0226575
323413|Dokdonella	-0.706264	9.59614	7.02294	0.00850627	0.0234071
54066|Xylophilus	-0.642582	12.1155	6.9745	0.00873367	0.0239491
432330|Tumebacillus	-0.83922	11.7293	6.80183	0.0095966	0.026224
83614|Luteimonas	-0.651531	12.0422	6.7739	0.00974427	0.0265354
2049301|Changchengzhania	0.796784	7.03417	11.3224	0.00993505	0.0269617
1784836|Fermentimonas	-1.06191	10.0388	6.718	0.0100468	0.0271713
34098|Blattabacterium	-0.682903	7.5521	6.68225	0.0102453	0.0276133
499228|Tepidanaerobacter	-0.906802	7.13053	13.7238	0.0104891	0.0281738
2478349|Indioceanicola	0.925162	7.5236	6.62757	0.0105569	0.0281822
518733|Microterricola	-0.559384	10.4521	6.62637	0.0105639	0.0281822
1921784|Kiritimatiella	0.651063	7.0865	6.60011	0.010717	0.0284943
1097466|Defluviimonas	-0.75517	11.663	6.56626	0.0109179	0.0288634
843|Wolinella	-0.712963	7.29613	6.56437	0.0109292	0.0288634
1190|Fischerella	-0.897295	8.00919	6.55784	0.0109685	0.0288703
90243|Oligella	1.1089	11.3185	6.53406	0.0111126	0.029152
529883|Rhodoluna	1.12304	13.355	6.44469	0.0116719	0.0305175
390805|Geosporobacter	-0.682709	8.26263	6.37881	0.0121028	0.0315393
93|Stella	0.665523	6.98823	14.2698	0.0121927	0.0316688
286130|Sulfuricurvum	1.08766	9.44333	6.32894	0.0124398	0.0322044
458839|Actinotalea	-0.74111	9.57149	6.2662	0.0128777	0.0332287
1769012|Arachidicoccus	-0.651131	8.69795	6.19789	0.0133726	0.03429
121871|Haloterrigena	-0.822872	9.27496	6.19741	0.0133761	0.03429
414371|Aureimonas	-0.642255	11.6104	6.1752	0.0135413	0.0345016
1676651|Limnochorda	-0.69727	7.42034	6.17019	0.0135789	0.0345016
1621534|Paraglaciecola	0.557311	7.11684	6.16868	0.0135902	0.0345016
2717|Cardiobacterium	-0.701198	11.0963	6.0741	0.0143203	0.0362381
79328|Chitinophaga	-0.533027	10.9723	6.06425	0.0143986	0.0363195
311181|Denitratisoma	-0.646824	7.62373	5.98801	0.0150201	0.0377215
41201|Ewingella	-0.735213	7.78812	5.9844	0.0150503	0.0377215
1505664|Gottschalkia	-0.606017	6.95782	14.925	0.0151443	0.0378366
1073986|Halobellus	0.528641	7.0425	5.93876	0.0154363	0.0384442
169055|Nordella	-0.674357	7.30018	5.86807	0.0160548	0.0398583
1051|Ectothiorhodospira	0.717215	9.1841	5.82879	0.0164094	0.0406108
231683|Saccharospirillum	-0.781399	8.45312	5.7896	0.0167714	0.0413764
119044|Filomicrobium	-0.587242	10.3258	5.76947	0.0169605	0.0417123
264688|Trichormus	-0.615126	7.15784	5.70618	0.0175697	0.043048
2126281|Mycolicibacillus	-0.983606	7.58878	15.0827	0.017613	0.043048
34008|Rhodovulum	-0.6323	10.7499	5.65165	0.0181128	0.0441325
1763521|Paludisphaera	-0.684388	11.7548	5.61148	0.0185241	0.0449953
52959|Polaribacter	0.914453	9.20447	5.58974	0.0187507	0.0453943
74385|Gracilibacillus	-0.725684	8.92328	5.58469	0.0188037	0.0453943
72763|Tessaracoccus	-0.663494	14.738	5.54549	0.0192208	0.0462592
953|Wolbachia	-0.597833	8.18025	5.53753	0.0193066	0.0462663
1930845|Ndongobacter	1.08776	9.14275	5.53433	0.0193413	0.0462663
1906660|Candidatus Mikella	0.791569	7.92923	5.52386	0.0194551	0.0463974
45989|Methanoculleus	-0.860174	7.16906	8.95934	0.01966	0.0467444
2707020|Aerosticca	-0.606939	8.74236	5.48414	0.0198929	0.0471559
141450|Oleiphilus	0.884385	9.55056	5.46731	0.0200816	0.0474395
34067|Cycloclasticus	0.641848	7.25297	5.46274	0.0201331	0.0474395
143222|Salegentibacter	-0.853352	10.8828	5.40072	0.0208465	0.0489737
869|Dichelobacter	-0.646999	9.00648	5.3327	0.0216592	0.0507314
334202|Mupapillomavirus	-0.407167	7.01555	5.29943	0.0220686	0.051537
180541|Salinisphaera	0.776422	7.6019	5.28276	0.0222766	0.0518416
187492|Thalassolituus	0.740446	8.10975	5.27557	0.0223672	0.0518416
1632780|Phreatobacter	0.958466	15.2574	5.27323	0.0223966	0.0518416
109262|Halothiobacillus	0.874597	8.15879	5.21167	0.0231876	0.053441
1654741|Bombella	-0.60433	7.76	5.20894	0.0232234	0.053441
744724|Halarchaeum	-0.74744	7.36619	5.20005	0.0233403	0.0535534
2304693|Pseudoclostridium	0.846087	8.4474	5.16481	0.0238094	0.0544708
1936111|Fuerstia	0.797488	8.49146	5.15058	0.0240016	0.0546441
359407|Methylotenera	0.562412	7.16681	5.14893	0.024024	0.0546441
773|Bartonella	-0.421034	10.7518	5.14065	0.0241367	0.0546882
2529408|Schaalia	-0.681968	11.4585	5.1341	0.0242261	0.0546882
254245|Aquicella	0.504383	6.98262	8.78389	0.0242518	0.0546882
893|Desulfobulbus	-0.634645	7.69916	5.09067	0.0248287	0.0558292
299566|Adhaeribacter	-0.773839	8.94758	5.05804	0.0252917	0.0565957
335927|Thalassobius	-0.631218	8.77881	5.05652	0.0253135	0.0565957
245876|Nitratireductor	-0.522079	11.009	5.04311	0.0255065	0.0568657
2737|Vagococcus	-0.649164	10.8206	5.03293	0.0256541	0.0570332
1804663|Haematospirillum	0.656511	9.96479	5.01791	0.0258735	0.057359
178469|Arenibacter	-0.718794	8.74779	4.93257	0.0271576	0.0600366
88723|Natrinema	-0.712615	7.86898	4.91818	0.0273807	0.0603234
196082|Parascardovia	-0.545406	7.006	7.67225	0.0274406	0.0603234
34093|Simkania	0.691806	7.4977	4.8796	0.0279882	0.0613557
83551|Parachlamydia	0.797237	9.58733	4.7412	0.030286	0.0662086
1227|Nitrosococcus	0.688974	8.43275	4.73379	0.0304144	0.0662591
752201|Sphaerospermopsis	0.369341	6.98671	4.73017	0.0304775	0.0662591
55079|Aneurinibacillus	-0.862177	11.7489	4.69277	0.0311361	0.0675044
40136|Oligotropha	-0.531239	8.87333	4.64894	0.031927	0.069029
990721|Christensenella	-0.809368	8.93057	4.6361	0.0321626	0.0693478
2005386|Arabia	-0.631771	7.28719	4.6236	0.0323939	0.0696557
2078575|Psychromicrobium	0.654318	10.2445	4.59533	0.0329232	0.070601
354203|Yangia	-0.582092	8.46242	4.51008	0.0345751	0.0738013
2765402|Natrarchaeobaculum	-0.6832	8.13833	4.50867	0.0346032	0.0738013
2160|Methanobacterium	0.909471	9.40905	4.47111	0.035359	0.0751156
1623297|Stanholtvirus	0.410137	6.97645	6.6326	0.0354103	0.0751156
281472|Jiangella	-0.548068	10.8455	4.40185	0.0367989	0.0778515
890|Desulfuromonas	0.748536	8.79064	4.35275	0.0378569	0.0798749
2025617|Ketobacter	0.882492	9.75992	4.32637	0.0384385	0.0808853
1084558|Oceanicoccus	0.639623	7.67864	4.23791	0.0404586	0.0849091
1780190|Izhakiella	-0.620792	7.64004	4.18955	0.0416102	0.0870937
1827478|Youhaiella	-0.466773	7.0099	4.86503	0.0431379	0.0900517
2483368|Sedimentisphaera	0.677194	8.29068	4.10724	0.0436505	0.0908808
1988|Actinomadura	-0.581013	8.65355	4.05407	0.0450245	0.0934942
2370|Xylella	-0.442306	10.1204	4.01867	0.0459648	0.0951954
96492|Frigoribacterium	-0.55897	9.02403	4.00653	0.0462919	0.0956214
1524214|Vulgatibacter	-0.666577	8.67563	3.95853	0.0476101	0.0980869
1843210|Anaerocolumna	-1.80884	7.30331	35.4544	0.0481542	0.0989488
33073|Zymobacter	-0.643436	8.60976	3.89516	0.0494116	0.101268
71|Simonsiella	-0.562794	7.21327	4.83314	0.0499113	0.102026
1069494|Trueperella	-0.62234	10.6558	3.85412	0.0506165	0.1032
810|Chlamydia	-0.832942	14.2475	3.83197	0.05128	0.104283
1706036|Gemmatirosa	-0.555751	12.2933	3.79799	0.0523158	0.106115
1594166|Oricola	0.535624	7.08278	5.01425	0.052707	0.106633
947525|Miniimonas	-0.747323	7.20769	6.8439	0.0535623	0.108086
946234|Flavonifractor	-0.703826	9.87298	3.74015	0.0541303	0.108953
75687|Neptunomonas	0.690061	8.6908	3.72389	0.0546525	0.109723
238783|Pseudorhodobacter	-0.471467	11.9058	3.68434	0.0559448	0.112032
336276|Olleya	-0.542123	7.89458	3.6196	0.0581316	0.116116
159345|Roseibacterium	0.597261	7.62049	3.61441	0.0583109	0.116179
1602345|Parasaccharibacter	-0.543376	7.90594	3.60274	0.058716	0.116691
1543705|Nitrospirillum	-0.479584	7.33036	3.59043	0.0591464	0.117225
1434010|Jatrophihabitans	-0.536245	10.5325	3.58655	0.059283	0.117225
1331051|Candidatus Saccharimonas	-0.541985	10.8956	3.56485	0.0600519	0.118448
40222|Methylophaga	0.914271	13.2261	3.48497	0.0629767	0.123907
1551504|Candidatus Babela	0.734677	9.36285	3.42573	0.0652442	0.128048
29574|Taylorella	0.650121	12.3458	3.41333	0.0657298	0.12868
47|Archangium	-0.587552	11.2398	3.37453	0.0672747	0.13134
1075397|Halolamina	-0.619709	7.67289	3.37086	0.0674225	0.13134
158876|Yokenella	-0.575754	7.50851	3.35922	0.0678948	0.131934
1649490|Rubinisphaera	-0.516184	8.99038	3.33757	0.0687821	0.133329
1217416|Halioglobus	0.625062	8.59632	3.32835	0.069164	0.13374
63742|Natrialba	-0.546424	7.60451	3.30239	0.0702514	0.135509
1484898|Methyloceanibacter	0.518455	11.5199	3.28969	0.0707898	0.136214
346096|Paludibacter	-0.576105	8.60457	3.28049	0.0711829	0.136636
219181|Ottowia	-0.28273	12.3172	3.24035	0.0729247	0.139639
864|Pectinatus	-0.528937	7.56652	3.15461	0.0768022	0.146707
447467|Simiduia	0.283164	6.99443	3.13838	0.0775607	0.147797
44000|Caldicellulosiruptor	0.825101	9.77303	3.13028	0.0779422	0.148165
1915401|Roseitalea	-0.543767	6.96235	11.4298	0.0787539	0.149348
1649474|Nibribacter	-0.613911	8.20459	3.09257	0.0797463	0.150866
60136|Sulfitobacter	-0.459082	9.09776	3.0795	0.0803818	0.151704
106591|Ensifer	-0.385585	11.0154	3.04882	0.0818957	0.154191
2321115|Halarcobacter	0.540552	7.95525	3.03642	0.0825166	0.154989
10358|Cytomegalovirus	0.661841	7.40943	3.00446	0.0841401	0.157425
236752|Fastidiosipila	-0.869793	11.9634	3.00044	0.0843467	0.157425
167639|Ilyobacter	0.591627	7.44224	2.99914	0.0844135	0.157425
2330|Halanaerobium	-0.501883	7.31697	2.97921	0.085447	0.158976
444051|Mesoflavibacter	0.210508	6.94208	3.22642	0.0866835	0.160896
47670|Lautropia	-0.470448	8.39607	2.94022	0.087509	0.162046
86331|Mogibacterium	-0.612968	10.638	2.90422	0.0894607	0.165271
1433993|Chryseolinea	-0.592598	10.3552	2.89274	0.0900933	0.16605
1525371|Neorhizobium	-0.342015	10.8715	2.88342	0.0906103	0.166613
261963|Kangiella	0.595144	10.2064	2.86395	0.0917008	0.168225
390846|Echinicola	-0.589012	8.58942	2.85471	0.0922232	0.16879
73778|Methylocaldum	-0.492535	8.19532	2.84545	0.0927503	0.169171
83612|Psychroflexus	-0.518361	8.11102	2.8435	0.0928613	0.169171
1434050|Zhongshania	0.492559	7.57883	2.81788	0.0943387	0.171466
33055|Candidatus Kinetoplastibacterium	0.648627	8.9303	2.79752	0.0955309	0.173232
55968|Leucobacter	-0.419357	11.1406	2.79243	0.0958313	0.173378
187|Aquaspirillum	0.74445	10.0905	2.76673	0.097365	0.175748
1738655|Woeseia	0.690003	10.682	2.7279	0.0997333	0.179602
400947|Deefgea	0.51572	7.56397	2.72362	0.099998	0.179602
96|Gallionella	0.569324	9.56136	2.72052	0.100191	0.179602
189384|Candidatus Tremblaya	0.764967	13.7998	2.71368	0.100617	0.179602
175304|Lentibacillus	-0.531669	10.7971	2.71328	0.100641	0.179602
292691|Gramella	-0.632182	10.0556	2.70352	0.101253	0.180285
630749|Spongiibacter	0.480781	7.378	2.62566	0.106278	0.188805
244698|Gillisia	-0.653731	10.2861	2.57569	0.109647	0.194228
2321113|Pseudoarcobacter	0.530837	7.48627	2.57312	0.109824	0.194228
401618|Candidatus Riesia	0.442223	7.56676	2.55301	0.111216	0.196107
1542963|Halapricum	-0.342848	7.04379	2.55058	0.111385	0.196107
832|Fibrobacter	0.548431	7.61268	2.52748	0.11301	0.198525
1283313|Alloprevotella	0.617075	7.90072	2.50847	0.114368	0.200463
225143|Oceanisphaera	-0.557836	11.6607	2.49063	0.115658	0.202273
2222|Methanothrix	0.764226	9.24725	2.4293	0.120219	0.209784
655184|Candidatus Thioglobus	0.413204	7.34087	2.42304	0.120696	0.210149
257820|Kerstersia	0.452735	10.6475	2.40433	0.122133	0.212182
1882917|Pajaroellobacter	-0.422285	8.95631	2.37932	0.124084	0.215097
235888|Salinibacterium	-0.411255	8.63566	2.36142	0.125501	0.217076
465|Tatlockia	0.528306	10.3404	2.33298	0.127791	0.220552
358023|Lutibacter	-0.435799	9.1465	2.30934	0.129731	0.223409
1172191|Catenovulum	0.48634	7.70206	2.29724	0.130736	0.224649
32014|Iodobacter	0.458678	7.67126	2.29079	0.131275	0.225084
1676125|Thermogutta	-0.448367	9.60555	2.25211	0.134562	0.230129
2042066|Paraphotobacterium	0.46469	7.96314	2.24833	0.134889	0.230129
335405|Sphingosinicella	-0.360238	10.4709	2.24595	0.135095	0.230129
158481|Hahella	-0.408204	7.06171	2.19664	0.13944	0.237017
1623278|Bronvirus	0.516708	7.68092	2.18822	0.140198	0.237793
2676060|Allopseudarcicella	0.701278	12.2925	2.17019	0.141835	0.239817
466152|Singulisphaera	0.421542	7.46546	2.16838	0.142001	0.239817
111500|Muricauda	-0.405915	8.11974	2.1572	0.143029	0.240573
459532|Terribacillus	-0.48927	9.58188	2.15687	0.14306	0.240573
253238|Ethanoligenens	-0.452961	10.7846	2.11713	0.146783	0.246307
986106|Acidiferrobacter	0.535873	9.51686	2.07835	0.150522	0.252044
1734920|Pseudorhodoplanes	-0.3095	10.6144	2.0643	0.151904	0.253819
1647|Erysipelothrix	-0.488887	9.99695	2.06065	0.152265	0.253883
327159|Candidatus Accumulibacter	-0.392643	9.39995	2.0296	0.155378	0.258306
1755825|Egicoccus	-0.53211	7.67821	2.02268	0.156082	0.258306
1470540|Jeotgalibaca	-0.527553	12.0007	2.0216	0.156192	0.258306
162171|Magnetococcus	0.388066	7.47821	2.02122	0.156231	0.258306
1273155|Thiohalobacter	-0.410534	8.15219	1.96272	0.162333	0.267833
1652133|Halobacteriovorax	-0.394161	7.47694	1.95726	0.162917	0.268234
51366|Salinivibrio	-0.3884	7.97593	1.94812	0.163899	0.269287
178898|Carboxydocella	-0.39068	7.64835	1.93244	0.165599	0.271513
318147|Paucibacter	-0.328411	9.41011	1.87576	0.171918	0.281059
556257|Pseudolabrys	-0.320582	10.715	1.87385	0.172135	0.281059
754249|Luteimicrobium	-0.38024	7.36626	1.99237	0.172503	0.281076
1912217|Pseudopropionibacterium	-0.395403	7.75061	1.86622	0.173008	0.281317
379070|Gilvibacter	0.113596	6.95791	1.84923	0.17497	0.283921
2675233|Metabacillus	-0.427214	12.5107	1.77452	0.18391	0.297814
1611681|Mucinivorans	-0.349747	7.2806	1.74928	0.18705	0.302276
1077265|Chthonomonas	-0.427284	8.53308	1.74363	0.187761	0.302804
1107|Chloroflexus	-0.452781	7.86466	1.73441	0.188929	0.304064
2678343|Halalkaliarchaeum	-0.410537	6.99491	4.63505	0.191858	0.308147
1301080|Candidatus Nasuia	0.558675	10.1962	1.70764	0.192368	0.308337
40751|Thioploca	0.439063	8.66432	1.69445	0.194088	0.310462
1218|Prochlorococcus	-0.391863	7.21894	2.34566	0.196635	0.313899
1541445|Candidatus Phaeomarinobacter	-0.353371	8.62065	1.65086	0.199907	0.318475
1434046|Sphingorhabdus	0.399632	8.33675	1.61363	0.20504	0.325249
1656823|Halanaeroarchaeum	-0.48558	7.10401	3.41431	0.2052	0.325249
11646|Lentivirus	0.577477	7.5872	1.61003	0.205544	0.325249
57495|Dermacoccus	-0.3662	12.0006	1.60813	0.205812	0.325249
1209327|Flavivirga	-0.373767	7.50867	1.59599	0.207526	0.3273
84406|Virgibacillus	-0.42079	12.8018	1.58805	0.208658	0.327852
83770|Succinivibrio	-0.312597	6.95026	4.03459	0.208709	0.327852
65047|Mitsuaria	-0.303437	9.85994	1.56902	0.211397	0.331414
2005380|Mariniblastus	-0.375006	8.53724	1.56205	0.212411	0.332342
40544|Sutterella	0.531198	12.4975	1.55403	0.213587	0.333518
1521255|Candidatus Paracaedibacter	0.403282	10.9923	1.53803	0.215952	0.336543
1231242|Ferrovibrio	0.403605	8.12883	1.53496	0.21641	0.33659
599651|Bermanella	0.468626	9.9166	1.51712	0.219092	0.34009
221065|Kordia	-0.376008	7.59358	1.50837	0.220422	0.341481
1981050|Phoenicibacter	-0.745068	7.02196	10.7529	0.226382	0.350025
156973|Dysgonomonas	-0.421909	8.61485	1.45792	0.228284	0.352273
89404|Glaciecola	-0.535856	7.10862	4.32725	0.229707	0.353256
1579315|Halocynthiibacter	-0.289542	8.69207	1.44831	0.229818	0.353256
393005|Tamlana	-0.374117	8.1391	1.43997	0.231161	0.354424
380738|Candidatus Kuenenia	-0.296096	6.96807	3.53214	0.231479	0.354424
332951|Halovivax	-0.693905	7.21987	5.27285	0.232289	0.354525
39773|Methylomicrobium	-0.324138	8.54554	1.43205	0.232446	0.354525
290174|Aquimarina	-0.354935	8.58068	1.42862	0.233004	0.354689
112987|Neochlamydia	-0.379538	8.99031	1.40814	0.236374	0.359124
1905344|Ruthenibacterium	-0.3913	7.78075	1.40155	0.237471	0.360096
240411|Chitinimonas	-0.372966	8.77268	1.39208	0.239058	0.361805
776|Coxiella	0.336	9.69171	1.34923	0.246405	0.372209
1073531|Mycolicibacter	0.338086	10.0291	1.343	0.247496	0.37314
261827|Algibacter	-0.324845	8.62435	1.33915	0.248173	0.373446
1906657|Candidatus Doolittlea	0.300246	7.25868	1.33309	0.249243	0.37434
1443919|Tabrizicola	0.24821	7.06859	1.31449	0.252566	0.378608
1291539|Candidatus Methanomethylophilus	-0.315987	6.96581	4.17813	0.254695	0.381073
291183|Lacinutrix	-0.501276	7.97658	3.52991	0.258933	0.38668
2717089|Massilistercora	-0.439934	9.4449	1.27344	0.260091	0.386705
376170|Haloplanus	-0.340184	7.22427	1.27227	0.26031	0.386705
1565532|Rouxiella	-0.405153	10.0641	1.27166	0.260424	0.386705
171|Leptospira	0.341315	8.19842	1.26455	0.261757	0.387945
881616|Herbiconiux	-0.346656	11.0561	1.26196	0.262245	0.387945
152161|Stappia	-0.281046	9.05117	1.25372	0.263805	0.388285
2335|Thermotoga	0.301837	7.25754	1.25345	0.263857	0.388285
241192|Thermodesulfatator	-0.354265	7.33139	1.25293	0.263955	0.388285
1682492|Candidatus Tachikawaea	-0.364461	7.63872	1.24987	0.264539	0.388418
252306|Robiginitalea	-0.284027	7.14025	1.19425	0.275416	0.403366
285107|Thioclava	-0.307737	11.9596	1.19261	0.275745	0.403366
119541|Rhodobaca	-0.290462	9.63204	1.18294	0.277697	0.405469
908623|Euzebya	-0.348364	7.20118	1.16218	0.281945	0.410909
2304692|Hungateiclostridium	-0.337178	7.91388	1.14804	0.284884	0.414249
1395974|Tardiphaga	-0.272311	10.2815	1.14374	0.285787	0.414249
2078948|Epidermidibacterium	0.369889	7.58373	1.1436	0.285816	0.414249
2132|Spiroplasma	-0.276822	8.08977	1.13302	0.288051	0.416721
1961799|Lacunisphaera	-0.350327	9.50434	1.12806	0.289107	0.417482
1960084|Rodentibacter	-0.329526	9.48095	1.12091	0.290638	0.418924
283735|Leeuwenhoekiella	0.328904	7.68364	1.11333	0.292271	0.420507
29407|Rhodoplanes	-0.295596	8.2673	1.10495	0.294092	0.422354
72173|Citromicrobium	-0.512037	7.07579	4.54132	0.296115	0.424485
623276|Maritalea	-0.305756	8.04448	1.09164	0.297012	0.424997
573657|Candidatus Hodgkinia	0.303799	9.02909	1.08143	0.299277	0.427317
869806|Marivirga	-0.339631	8.012	1.07945	0.299719	0.427317
262|Francisella	0.312653	10.9553	1.06939	0.301979	0.429532
2733115|Naesvirus	0.444485	7.14165	2.35014	0.302684	0.429532
59735|Bergeyella	-0.323031	8.14308	1.0629	0.303448	0.429532
458032|Chloracidobacterium	0.338534	7.85194	1.06286	0.303456	0.429532
933|Thiomicrospira	0.262837	7.38615	1.05721	0.304743	0.430105
2060722|Labilibaculum	0.288758	8.23196	1.05629	0.304954	0.430105
1705353|Aurantimicrobium	0.358984	10.2219	1.05085	0.306198	0.431087
34102|Sphaerotilus	-0.277278	13.1596	1.03838	0.309081	0.434369
1509243|Candidatus Nucleicultrix	-0.34149	9.87875	1.01077	0.315589	0.442724
57479|Microvirgula	0.297665	10.1717	0.981891	0.32259	0.451741
1344552|Noviherbaspirillum	0.312221	13.5437	0.976207	0.323993	0.452899
31988|Aminobacter	-0.255116	10.0086	0.938083	0.33361	0.464654
59282|Blastochloris	0.204353	12.1395	0.937564	0.333743	0.464654
644355|Inhella	-0.325477	8.75785	0.935896	0.334173	0.464654
160795|Ureibacillus	0.384236	10.8508	0.93325	0.334856	0.464783
249529|Caldanaerobacter	-0.328985	7.01789	2.74255	0.339542	0.470457
453161|Candidatus Nitrotoga	0.307188	10.223	0.907098	0.341709	0.472628
1751872|Lacimicrobium	0.256066	7.60066	0.898066	0.344121	0.475128
1654931|Crenobacter	0.339127	11.0315	0.86393	0.353444	0.486887
363408|Nonlabens	0.266843	8.25414	0.862383	0.353875	0.486887
36739|Dermabacter	0.326716	10.924	0.845504	0.358621	0.492556
2735|Verrucomicrobium	0.244875	7.37525	0.816014	0.367127	0.503361
12141|Tombusvirus	-0.163816	6.96242	0.794933	0.373381	0.511044
127|Isosphaera	-0.235342	8.20927	0.792435	0.374131	0.511183
490567|Arenimonas	-0.255294	7.98856	0.771152	0.380616	0.519142
336809|Candidatus Sulcia	-0.224373	8.07604	0.765401	0.382396	0.520667
188143|Enterovibrio	-0.238461	7.76581	0.747014	0.388165	0.52761
2690160|Limihaloglobus	0.294164	8.08907	0.743841	0.389174	0.528068
153265|Aequorivita	-0.308465	10.0399	0.727942	0.394283	0.53408
518753|Luteolibacter	-0.26557	7.77138	0.715568	0.398326	0.538092
2251|Haloferax	-0.229146	7.08606	0.7147	0.398612	0.538092
252356|Maribacter	0.245653	8.21025	0.69358	0.405661	0.54667
2375|Sporomusa	-0.3215	11.4126	0.690831	0.406592	0.546988
2045213|Candidatus Fonsibacter	-0.186335	7.14875	0.657997	0.417959	0.56132
53945|Octadecabacter	-0.368381	7.81669	1.73782	0.422839	0.566907
1091|Chlorobium	-0.341312	7.08201	1.98231	0.425655	0.569712
574697|Butyricimonas	-0.187153	7.06739	0.634062	0.426546	0.569935
235572|Candidatus Portiera	0.220432	9.24357	0.624372	0.430098	0.57346
104204|Streptomonospora	-0.273387	8.62816	0.6229	0.430641	0.57346
292486|Avibacterium	-0.240718	7.85412	0.609463	0.435652	0.578834
135575|Idiomarina	0.285931	9.78393	0.608145	0.436148	0.578834
1161127|Murdochiella	-0.260744	8.86382	0.599849	0.439291	0.581158
1511635|Aquisphaera	-0.286569	7.8956	0.599626	0.439376	0.581158
2732977|Citexvirus	0.275	7.4512	0.588431	0.443675	0.585859
1193515|Snodgrassella	0.277142	11.9569	0.578134	0.447686	0.590166
1579506|Roseimaritima	-0.258496	8.70491	0.574046	0.449295	0.591296
1676142|Wenzhouxiangella	0.226004	8.14557	0.568586	0.451457	0.59315
140052|Betaretrovirus	0.313392	11.5124	0.560893	0.454531	0.596194
1100891|Paenalcaligenes	0.247831	11.7855	0.554117	0.457267	0.598783
1129704|Kyrpidia	0.23319	7.54613	0.544958	0.461005	0.601853
1433402|Glycocaulis	-0.217367	7.48047	0.544629	0.46114	0.601853
230494|Reinekea	-0.21869	8.19864	0.527194	0.468397	0.610312
28884|Hydrogenovibrio	0.180585	7.32786	0.525073	0.469292	0.610468
28236|Petrotoga	-0.108441	7.01528	0.513138	0.474383	0.61602
1184396|Mesotoga	-0.417993	7.13604	2.71125	0.475126	0.61602
1934947|Immundisolibacter	0.236708	9.43419	0.484311	0.487055	0.630059
64895|Borreliella	-0.279436	7.03597	1.46815	0.487555	0.630059
461|Fluoribacter	0.191149	9.09212	0.471191	0.493009	0.636063
79206|Desulfosporosinus	-0.244585	8.73707	0.456002	0.500057	0.6441
326319|Dokdonia	-0.18595	7.0046	0.440626	0.507368	0.652449
1911549|Raineyella	-0.25623	8.28454	0.419128	0.517905	0.6645
365348|Pelosinus	-0.196913	9.36576	0.418079	0.518428	0.6645
152267|Pigmentiphaga	0.211177	9.26607	0.413238	0.520858	0.665707
44474|Pleurocapsa	0.200914	7.39414	0.412834	0.521062	0.665707
427753|Humibacter	-0.419032	7.33875	2.76173	0.522153	0.66602
1644057|Salinigranum	-0.219592	7.00806	0.839744	0.524551	0.667996
146784|Bacteriovorax	0.219289	11.07	0.39738	0.528961	0.671951
234|Brucella	-0.114366	11.7379	0.396602	0.529364	0.671951
69474|Orientia	0.169661	7.96363	0.392304	0.531603	0.673706
289201|Pontibacillus	-0.544165	7.21161	3.74013	0.537875	0.680558
1335631|Frischella	0.202074	7.96652	0.370269	0.543352	0.685509
329857|Cohnella	-0.214618	10.1627	0.369944	0.543529	0.685509
743714|Orbus	-0.267429	7.81481	0.365691	0.545854	0.687339
68288|Cyclobacterium	-0.240317	9.37114	0.362846	0.547419	0.68793
655352|Cohaesibacter	-0.155291	8.10432	0.361664	0.548072	0.68793
338321|Turneriella	0.42326	7.07558	2.39815	0.54979	0.688988
407217|Aquitalea	-0.279106	12.3599	0.353716	0.552499	0.691283
1505663|Erysipelatoclostridium	0.215416	8.64269	0.349585	0.554826	0.693093
351195|Salimicrobium	-0.219145	10.0158	0.343655	0.558201	0.695141
1237|Piscirickettsia	0.177328	10.0341	0.343599	0.558233	0.695141
745410|Gallaecimonas	-0.154343	7.97216	0.339289	0.56071	0.696506
146918|Salinibacter	-0.16781	7.03849	0.569686	0.561099	0.696506
112040|Zobellia	0.156451	7.45173	0.334258	0.563628	0.698544
1980513|Candidatus Nitrosoglobus	0.151722	7.79961	0.324452	0.569403	0.703957
79603|Denitrobacterium	-0.486698	7.40972	2.97964	0.569785	0.703957
28209|Chelatococcus	-0.122019	12.1363	0.314022	0.575672	0.710115
33024|Phascolarctobacterium	-0.196367	8.60494	0.310257	0.577969	0.711833
2024975|Silvanigrella	0.180894	8.4323	0.297244	0.586051	0.720659
1125|Microcystis	-0.159319	7.8754	0.282628	0.595406	0.731022
1778601|Apibacter	-0.189121	10.3008	0.278479	0.598119	0.733209
1649470|Minicystis	-0.140551	11.336	0.276793	0.599229	0.733426
157591|Sterolibacterium	-0.15338	10.4734	0.273866	0.601165	0.734654
288793|Salinimonas	-0.158469	7.47949	0.265936	0.606479	0.73901
425|Methylosinus	0.140131	8.41578	0.264378	0.607535	0.73901
49277|Psychroserpens	0.152968	8.56863	0.262793	0.608613	0.73901
75309|Rhodanobacter	-0.138222	9.29789	0.260806	0.609971	0.73901
1163|Anabaena	0.13403	7.31802	0.260803	0.609973	0.73901
106146|Pelistega	0.280117	14.004	0.260017	0.610512	0.73901
2019482|Brevefilum	-0.263281	7.58502	0.681173	0.611303	0.73901
1471399|Draconibacterium	0.163447	8.1162	0.252382	0.615799	0.742259
28196|Arcobacter	-0.16615	11.581	0.252271	0.615877	0.742259
1518147|Wenyingzhuangia	0.127302	7.49576	0.23967	0.624829	0.751897
2571159|Mycetohabitans	0.246255	10.9062	0.234007	0.628948	0.755697
1714270|Gammasphaerolipovirus	0.166119	6.96725	0.846712	0.632202	0.758449
305899|Endozoicomonas	0.149538	9.4246	0.227063	0.634083	0.758731
293088|Martelella	-0.121626	8.42552	0.225462	0.635281	0.758731
34019|Liberibacter	-0.101032	10.18	0.225398	0.635329	0.758731
2038|Tropheryma	-0.431826	7.40054	3.00025	0.63806	0.760839
2256|Natronobacterium	-0.106983	7.09961	0.219468	0.639812	0.761773
256319|Chlorobaculum	-0.109631	7.03762	0.209813	0.64727	0.769489
204476|Labrys	0.127124	8.28291	0.207622	0.648992	0.770372
104264|Cellulophaga	-0.116953	7.85288	0.192274	0.66137	0.783883
1203|Scytonema	0.15591	10.9773	0.190781	0.662605	0.784165
1274351|Kroppenstedtia	-0.17027	7.33298	0.181853	0.670115	0.790888
436357|Thalassococcus	0.114636	7.84658	0.181549	0.670374	0.790888
286104|Winogradskyella	0.126123	7.91976	0.179926	0.671764	0.790888
44260|Moorella	-0.124919	7.83086	0.179296	0.672305	0.790888
246861|Grimontia	0.119113	7.96661	0.177888	0.673519	0.791133
227873|Pannonibacter	-0.124456	10.2969	0.175509	0.675584	0.792377
644652|Gordonibacter	-0.1622	8.35054	0.17157	0.679038	0.795243
155977|Acaryochloris	0.0696078	7.00663	0.170105	0.680335	0.795577
299261|Tateyamaria	0.128818	7.53077	0.167007	0.683099	0.797625
2211641|Yoonia	-0.142747	10.386	0.162818	0.686884	0.799552
1855416|Qipengyuania	-0.436967	7.15487	2.8177	0.687749	0.799552
265488|Rhodopirellula	0.14755	8.82603	0.160006	0.689457	0.799552
1101|Prosthecochloris	-0.100838	7.04811	0.159865	0.689587	0.799552
768|Anaplasma	0.110926	7.5623	0.159134	0.69026	0.799552
71666|Waddlia	0.090348	7.25527	0.1585	0.690845	0.799552
332102|Fluviicola	-0.135359	10.9829	0.148023	0.700724	0.809374
18|Pelobacter	0.139463	8.85782	0.147333	0.701389	0.809374
1921582|Orrella	0.11568	10.129	0.145969	0.702709	0.809437
1648508|Ciceribacter	0.0761426	7.21655	0.145154	0.7035	0.809437
198251|Candidatus Pelagibacter	0.0920579	8.06162	0.136815	0.711748	0.817594
379068|Galbibacter	-0.160455	9.37443	0.135865	0.712706	0.817594
1937972|Bernardetia	-0.217584	6.98728	0.638154	0.713707	0.817594
2035811|Pseudodesulfovibrio	-0.115611	7.2025	0.130051	0.718652	0.822063
1744881|Sulfuricaulis	-0.109565	9.11305	0.122236	0.726885	0.828356
1562|Desulfotomaculum	0.130254	8.18387	0.121738	0.72742	0.828356
59739|Flammeovirga	0.0475623	7.04956	0.120904	0.728319	0.828356
1055692|Chitinolyticbacter	0.084741	7.13002	0.120282	0.72899	0.828356
1582879|Ezakiella	-0.126417	8.82074	0.119889	0.729416	0.828356
1073987|Halorientalis	-0.119779	7.27545	0.115956	0.733719	0.832041
11019|Alphavirus	0.83877	7.16414	5.80053	0.735197	0.832518
1156568|Methylovirgula	0.0494642	7.06891	0.111714	0.738452	0.835003
267408|Arsenicicoccus	0.117907	10.099	0.109507	0.740954	0.835898
2115980|Candidatus Phycorickettsia	0.0961959	7.84856	0.109144	0.741368	0.835898
43773|Syntrophus	-0.214269	7.4491	0.54319	0.745558	0.83942
258255|Pseudovibrio	-0.0797982	9.01415	0.103769	0.747594	0.840509
1825023|Candidatus Nitrosotenuis	-0.107692	7.47875	0.0969425	0.755762	0.846089
447237|Frondihabitans	0.0861675	7.59774	0.0968613	0.755861	0.846089
508459|Cloacibacillus	0.127171	7.81109	0.0967411	0.756008	0.846089
958|Bdellovibrio	0.0734557	11.3864	0.096047	0.756857	0.846089
41707|Lawsonia	-0.0718863	7.15424	0.091238	0.762834	0.849724
99479|Tetrasphaera	0.108616	8.90169	0.0906472	0.76358	0.849724
1543704|Niveispirillum	-0.0915924	11.9635	0.0901906	0.764159	0.849724
2093783|Methylomusa	-0.106402	9.76833	0.0894865	0.765054	0.849724
114627|Alkaliphilus	0.0924092	7.90692	0.0891307	0.765507	0.849724
48075|Marinobacterium	0.0896248	9.57449	0.0878341	0.767169	0.849923
626119|Ruania	0.0333861	7.07421	0.0871184	0.768092	0.849923
456492|Saccharibacillus	-0.118874	8.83775	0.0864743	0.768927	0.849923
292635|Laceyella	0.111773	9.74121	0.0846594	0.771296	0.851281
1920864|Rtpvirus	-0.0520052	7.10418	0.0832812	0.773113	0.851281
367771|Marinovum	-0.0861512	7.82915	0.0830647	0.7734	0.851281
225842|Formosa	-0.0847497	8.18241	0.0821618	0.774602	0.851413
1522431|Thermosulfurimonas	0.019198	6.99955	0.0802044	0.77723	0.853111
230666|Chitinibacter	0.0896427	7.13972	0.124216	0.783332	0.85861
1608298|Thiolapillus	0.0605197	7.48021	0.0734906	0.786521	0.860907
289244|Xylanimicrobium	0.0635613	7.12708	0.0719958	0.788651	0.862039
104267|Tenacibaculum	-0.0760861	8.95737	0.0703025	0.791092	0.863509
1653174|Actinotignum	-0.0866352	8.67546	0.0693227	0.79252	0.863869
1802983|Candidatus Fokinia	-0.0815167	7.47698	0.0588334	0.808527	0.880098
2276|Pyrobaculum	-0.17219	7.03721	0.37299	0.811251	0.881844
58050|Moritella	-0.0657899	8.51268	0.0518973	0.819961	0.889121
45667|Halobacillus	0.0832241	11.8879	0.0517537	0.820206	0.889121
417127|Zunongwangia	0.0596743	7.76034	0.0438982	0.834196	0.901325
334107|Conchiformibius	0.0646788	8.18187	0.0434757	0.834984	0.901325
1434019|Mameliella	0.0577938	7.82928	0.0434585	0.835016	0.901325
282132|Candidatus Protochlamydia	-0.0749824	10.7233	0.0429105	0.836045	0.901325
376488|Halotalea	-0.0690843	9.04547	0.0418084	0.838134	0.902342
1649480|Planctopirus	0.0661728	10.1596	0.0397385	0.842138	0.904693
455076|Rhodocytophaga	0.0751449	8.00336	0.0392772	0.843045	0.904693
203804|Candidatus Blochmannia	-0.291434	7.19226	1.1683	0.843767	0.904693
748770|Dolichospermum	-0.0607729	7.75874	0.0366002	0.84842	0.908187
741759|Tomitella	-0.0750035	7.28183	0.0360892	0.849469	0.908187
2094023|Glaesserella	0.0532394	9.33642	0.0349649	0.851805	0.908187
1970191|Salinivirga	-0.394531	7.4183	2.0586	0.852515	0.908187
50|Chondromyces	-0.0549051	11.1721	0.0344936	0.852796	0.908187
140458|Thermacetogenium	-0.0294405	6.98194	0.0297502	0.863183	0.916932
202746|Sulfurimonas	0.00794698	7.29562	0.0296825	0.863337	0.916932
2028344|Ereboglobus	0.0459504	7.91276	0.0284254	0.866235	0.918769
2690159|Anaerohalosphaera	-0.0695581	7.27476	0.0258953	0.872273	0.923928
57665|Sulfurospirillum	0.0594511	7.90154	0.0248166	0.874939	0.924863
273135|Candidatus Cardinium	0.0449988	7.55443	0.0245903	0.875506	0.924863
670486|Dehalogenimonas	0.192608	7.0256	0.585684	0.878841	0.92629
1434018|Lysinimonas	0.0328944	7.447	0.0231372	0.879211	0.92629
1524217|Labilithrix	0.041663	12.7851	0.0194639	0.889145	0.935504
1408194|Endomicrobium	0.0411773	7.19888	0.0180156	0.893324	0.938646
1755829|Ichthyobacterium	0.0209485	7.11115	0.0162492	0.898658	0.942992
242605|Luteibacter	0.0357666	10.2217	0.0151594	0.902098	0.944443
231454|Dyella	-0.0399653	10.8344	0.014919	0.902873	0.944443
54304|Planktothrix	-0.0396305	8.19025	0.014683	0.903641	0.944443
1649463|Lentilitoribacter	0.0480715	7.04966	0.0686519	0.911797	0.951703
1869285|Allofrancisella	-0.041286	7.1964	0.0236072	0.913407	0.952121
203133|Propionimicrobium	0.0167384	7.0735	0.0111919	0.915823	0.953377
1443590|Ferriphaselus	0.0274549	9.60395	0.0104415	0.918684	0.955092
649460|Filimonas	0.0239794	10.7524	0.00917405	0.923763	0.958815
194195|Alysiella	-0.0358171	8.96151	0.00894881	0.924702	0.958815
138|Borrelia	-0.297641	7.07007	1.25958	0.925939	0.958834
2173039|Arcticibacterium	-0.684629	7.80776	4.96811	0.928279	0.959995
323620|Shinella	-0.0267872	9.43606	0.00772092	0.930044	0.960557
64159|Desulfurobacterium	-0.165996	6.97981	0.477954	0.931624	0.960928
123|Pirellula	-0.0253261	9.71311	0.0068504	0.934096	0.962217
392332|Geoalkalibacter	-0.0272141	8.39385	0.0059594	0.938522	0.963824
82980|Leminorella	-0.768947	7.60753	7.14131	0.93878	0.963824
1518149|Thalassotalea	0.0156984	8.10527	0.00580347	0.93933	0.963824
359336|Castellaniella	0.02486	8.91143	0.00496028	0.943902	0.967254
1692042|Sulfurifustis	0.0200733	8.70938	0.00427962	0.947887	0.968511
232523|Hylemonella	-0.0217632	8.96095	0.00416722	0.948575	0.968511
261825|Agarivorans	-0.022674	7.92177	0.00409097	0.949047	0.968511
204447|Skermanella	0.0242335	12.2951	0.00393114	0.950051	0.968511
1778653|Sulfuriferula	0.0419475	7.05852	0.0575834	0.952206	0.969451
204619|Candidatus Nardonella	-0.299515	7.26994	1.38223	0.958115	0.973728
529881|Candidatus Aquiluna	-0.0919657	7.17147	0.0909536	0.959322	0.973728
651456|Kosmotoga	-0.372741	7.01622	2.64512	0.960469	0.973728
416|Methylomonas	0.0131168	9.2759	0.00229274	0.961844	0.973728
29331|Amphibacillus	-0.0188707	8.62786	0.00211135	0.963383	0.973728
1134403|Melioribacter	-0.168915	7.33696	0.335305	0.96383	0.973728
2321111|Aliiarcobacter	-0.0121927	8.05022	0.00110477	0.973509	0.981309
2035712|Guyparkeria	-0.0170956	6.99568	0.00100523	0.97473	0.981309
527198|Mariniflexile	-0.132783	7.26818	0.159788	0.975075	0.981309
33001|Desulfurella	-0.00806258	7.86865	0.000755387	0.978093	0.98309
238749|Diaphorobacter	0.00454867	11.811	0.000621542	0.980128	0.983879
1302410|Candidatus Annandia	0.216881	7.0774	0.634333	0.982007	0.984509
1158|Oscillatoria	-0.48586	7.00316	4.2683	0.990091	0.991351
697025|Hoyosella	-0.00820154	7.6944	8.54215e-06	0.99767	0.99767

## Sheet: human colorectal vs. HD
gene id	logFC	logCPM	F	PValue	FDR
ENSG00000089157.15|mRNA|RPLP0|ENSG00000089157.15|ENSG00000089157.15|0|4001	-2.11211	9.55837	152.426	3.67691e-28	7.3336e-24
ENSG00000233927.4|mRNA|RPS28|ENSG00000233927.4|ENSG00000233927.4|0|2119	-1.94462	7.40409	145.292	3.77817e-27	3.40045e-23
ENSG00000114942.13|mRNA|EEF1B2|ENSG00000114942.13|ENSG00000114942.13|0|1915	-1.94928	8.8458	144.374	5.11474e-27	3.40045e-23
ENSG00000147403.16|mRNA|RPL10|ENSG00000147403.16|ENSG00000147403.16|0|4825	-1.84657	8.83456	141.675	1.25045e-26	6.23504e-23
ENSG00000231500.6|mRNA|RPS18|ENSG00000231500.6|ENSG00000231500.6|0|1898	-2.1238	9.0039	139.493	2.58763e-26	9.17773e-23
ENSG00000136942.14|mRNA|RPL35|ENSG00000136942.14|ENSG00000136942.14|0|1535	-1.92196	8.71028	139.299	2.76091e-26	9.17773e-23
ENSG00000198755.10|mRNA|RPL10A|ENSG00000198755.10|ENSG00000198755.10|0|1501	-2.05995	7.90802	137.187	5.60233e-26	1.59626e-22
ENSG00000124614.13|mRNA|RPS10|ENSG00000124614.13|ENSG00000124614.13|0|1642	-1.97836	9.01321	136.402	7.29627e-26	1.81905e-22
ENSG00000198034.10|mRNA|RPS4X|ENSG00000198034.10|ENSG00000198034.10|0|2982	-1.90983	9.57106	135.823	8.86759e-26	1.92752e-22
ENSG00000168028.13|mRNA|RPSA|ENSG00000168028.13|ENSG00000168028.13|0|3936	-1.79982	8.89129	135.568	9.66417e-26	1.92752e-22
ENSG00000161016.17|mRNA|RPL8|ENSG00000161016.17|ENSG00000161016.17|0|2159	-1.9987	9.1592	135.113	1.12689e-25	2.04326e-22
ENSG00000142937.11|mRNA|RPS8|ENSG00000142937.11|ENSG00000142937.11|0|2847	-2.08219	9.50339	134.204	1.53228e-25	2.54678e-22
ENSG00000156482.10|mRNA|RPL30|ENSG00000156482.10|ENSG00000156482.10|0|4027	-2.00516	8.28068	133.632	1.86011e-25	2.85384e-22
ENSG00000204628.11|mRNA|RACK1|ENSG00000204628.11|ENSG00000204628.11|0|5990	-1.94433	9.52806	133.328	2.06169e-25	2.93717e-22
ENSG00000171863.12|mRNA|RPS7|ENSG00000171863.12|ENSG00000171863.12|0|5583	-1.99114	8.44651	132.773	2.48913e-25	3.12967e-22
ENSG00000186468.12|mRNA|RPS23|ENSG00000186468.12|ENSG00000186468.12|0|4204	-1.8241	9.59607	132.716	2.53799e-25	3.12967e-22
ENSG00000167526.13|mRNA|RPL13|ENSG00000167526.13|ENSG00000167526.13|0|6172	-2.01624	9.60942	132.57	2.66755e-25	3.12967e-22
ENSG00000134419.15|mRNA|RPS15A|ENSG00000134419.15|ENSG00000134419.15|0|6679	-1.73598	8.99258	131.369	4.01411e-25	4.44786e-22
ENSG00000197756.9|mRNA|RPL37A|ENSG00000197756.9|ENSG00000197756.9|0|6841	-2.04596	8.2229	131.075	4.43755e-25	4.65826e-22
ENSG00000198918.7|mRNA|RPL39|ENSG00000198918.7|ENSG00000198918.7|0|2141	-1.96577	7.90344	130.478	5.44165e-25	5.42669e-22
ENSG00000063177.12|mRNA|RPL18|ENSG00000063177.12|ENSG00000063177.12|0|4209	-1.96771	8.92692	130.238	5.90549e-25	5.60881e-22
ENSG00000105640.12|mRNA|RPL18A|ENSG00000105640.12|ENSG00000105640.12|0|3527	-1.91495	9.35701	130.067	6.26299e-25	5.67797e-22
ENSG00000071082.10|mRNA|RPL31|ENSG00000071082.10|ENSG00000071082.10|0|5791	-1.97029	8.87497	129.687	7.1307e-25	6.18356e-22
ENSG00000026025.15|mRNA|VIM|ENSG00000026025.15|ENSG00000026025.15|0|5158	-1.78423	8.80615	129.32	8.08721e-25	6.72081e-22
ENSG00000275688.4|mRNA|CCL15-CCL14|ENSG00000275688.4|ENSG00000275688.4|0|1047	-3.21031	4.67042	128.827	9.57783e-25	7.64119e-22
ENSG00000276409.4|mRNA|CCL14|ENSG00000276409.4|ENSG00000276409.4|0|3269	-3.286	4.6505	126.931	1.83806e-24	1.39713e-21
ENSG00000011052.21|mRNA|NME1-NME2|ENSG00000011052.21|ENSG00000011052.21|0|1241	-1.94769	6.67637	126.849	1.89133e-24	1.39713e-21
ENSG00000138326.18|mRNA|RPS24|ENSG00000138326.18|ENSG00000138326.18|0|4880	-1.88686	8.98041	126.471	2.15426e-24	1.53452e-21
ENSG00000105193.8|mRNA|RPS16|ENSG00000105193.8|ENSG00000105193.8|0|2603	-1.95841	7.81279	126.328	2.26359e-24	1.5568e-21
ENSG00000130255.12|mRNA|RPL36|ENSG00000130255.12|ENSG00000130255.12|0|2272	-1.9641	7.74821	125.705	2.80725e-24	1.86635e-21
ENSG00000145425.9|mRNA|RPS3A|ENSG00000145425.9|ENSG00000145425.9|0|2341	-1.78808	9.8745	125.396	3.12458e-24	2.01031e-21
ENSG00000171858.17|mRNA|RPS21|ENSG00000171858.17|ENSG00000171858.17|0|1023	-2.03307	7.84133	125.283	3.24825e-24	2.02458e-21
ENSG00000115268.9|mRNA|RPS15|ENSG00000115268.9|ENSG00000115268.9|0|2137	-1.90996	8.63011	125.032	3.54411e-24	2.1139e-21
ENSG00000166441.12|mRNA|RPL27A|ENSG00000166441.12|ENSG00000166441.12|0|7193	-1.89303	8.49554	124.984	3.60355e-24	2.1139e-21
ENSG00000109686.17|mRNA|SH3D19|ENSG00000109686.17|ENSG00000109686.17|0|7789	-2.18774	4.61987	124.675	4.01015e-24	2.28521e-21
ENSG00000169442.8|mRNA|CD52|ENSG00000169442.8|ENSG00000169442.8|0|935	-2.08989	6.67562	123.981	5.10283e-24	2.82711e-21
ENSG00000148303.16|mRNA|RPL7A|ENSG00000148303.16|ENSG00000148303.16|0|2242	-1.85672	8.92417	123.491	6.04962e-24	3.26107e-21
ENSG00000243678.11|mRNA|NME2|ENSG00000243678.11|ENSG00000243678.11|0|2632	-1.95578	6.54878	122.99	7.20416e-24	3.78124e-21
ENSG00000140988.15|mRNA|RPS2|ENSG00000140988.15|ENSG00000140988.15|0|2413	-2.03554	9.49613	122.615	8.20964e-24	4.14734e-21
ENSG00000170889.13|mRNA|RPS9|ENSG00000170889.13|ENSG00000170889.13|0|4371	-2.04219	7.91441	122.577	8.31755e-24	4.14734e-21
ENSG00000147604.13|mRNA|RPL7|ENSG00000147604.13|ENSG00000147604.13|0|2907	-1.80829	9.0151	121.762	1.1057e-23	5.3788e-21
ENSG00000108107.14|mRNA|RPL28|ENSG00000108107.14|ENSG00000108107.14|0|6933	-1.81478	9.96446	120.906	1.49161e-23	7.08337e-21
ENSG00000100129.17|mRNA|EIF3L|ENSG00000100129.17|ENSG00000100129.17|0|4296	-1.74407	7.61613	120.685	1.61147e-23	7.38167e-21
ENSG00000156508.17|mRNA|EEF1A1|ENSG00000156508.17|ENSG00000156508.17|0|5948	-1.73338	11.8719	120.655	1.62845e-23	7.38167e-21
ENSG00000110700.6|mRNA|RPS13|ENSG00000110700.6|ENSG00000110700.6|0|2186	-1.87965	7.42454	120.487	1.72716e-23	7.65516e-21
ENSG00000255508.7|mRNA|AP002990.1|ENSG00000255508.7|ENSG00000255508.7|0|5197	-1.69389	9.62223	120.356	1.80813e-23	7.83984e-21
ENSG00000254772.9|mRNA|EEF1G|ENSG00000254772.9|ENSG00000254772.9|0|2716	-1.69345	9.61764	120.246	1.87933e-23	7.97518e-21
ENSG00000279738.1|lncRNA|AL022311.1|ENSG00000279738.1|ENSG00000279738.1|0|19416	-1.78569	6.76454	119.908	2.11634e-23	8.79383e-21
ENSG00000142534.6|mRNA|RPS11|ENSG00000142534.6|ENSG00000142534.6|0|1390	-1.67799	9.22657	119.728	2.25397e-23	9.1746e-21
ENSG00000149273.14|mRNA|RPS3|ENSG00000149273.14|ENSG00000149273.14|0|5894	-1.84395	9.25017	119.493	2.44867e-23	9.76775e-21
ENSG00000112306.7|mRNA|RPS12|ENSG00000112306.7|ENSG00000112306.7|0|767	-1.85009	8.56573	119.385	2.54342e-23	9.94677e-21
ENSG00000182718.16|mRNA|ANXA2|ENSG00000182718.16|ENSG00000182718.16|0|8824	-1.90082	7.55723	117.401	5.11722e-23	1.96275e-20
ENSG00000143947.13|mRNA|RPS27A|ENSG00000143947.13|ENSG00000143947.13|0|3130	-1.86381	8.87423	117.101	5.69029e-23	2.12698e-20
ENSG00000137154.12|mRNA|RPS6|ENSG00000137154.12|ENSG00000137154.12|0|2714	-1.88183	10.0898	117.067	5.75868e-23	2.12698e-20
ENSG00000277957.1|mRNA|SENP3-EIF4A1|ENSG00000277957.1|ENSG00000277957.1|0|3519	-1.62993	7.64711	116.213	7.79205e-23	2.82568e-20
ENSG00000123349.13|mRNA|PFDN5|ENSG00000123349.13|ENSG00000123349.13|0|3380	-1.41528	7.83492	116.112	8.07535e-23	2.87612e-20
ENSG00000169100.13|mRNA|SLC25A6|ENSG00000169100.13|ENSG00000169100.13|0|2164	-1.87491	6.73703	115.851	8.85833e-23	3.09964e-20
ENSG00000163682.15|mRNA|RPL9|ENSG00000163682.15|ENSG00000163682.15|0|3259	-1.89322	8.57912	115.756	9.1636e-23	3.15117e-20
ENSG00000142541.16|mRNA|RPL13A|ENSG00000142541.16|ENSG00000142541.16|0|2369	-1.75151	10.9989	114.94	1.22437e-22	4.13898e-20
ENSG00000182774.10|mRNA|RPS17|ENSG00000182774.10|ENSG00000182774.10|0|3812	-1.92754	8.76638	114.791	1.29138e-22	4.29276e-20
ENSG00000118181.10|mRNA|RPS25|ENSG00000118181.10|ENSG00000118181.10|0|1477	-1.78559	8.55176	114.481	1.44173e-22	4.714e-20
ENSG00000161960.14|mRNA|EIF4A1|ENSG00000161960.14|ENSG00000161960.14|0|5316	-1.63545	7.59334	114.27	1.55442e-22	5.00046e-20
ENSG00000215021.8|mRNA|PHB2|ENSG00000215021.8|ENSG00000215021.8|0|2499	-1.89416	6.19305	113.692	1.90999e-22	6.04678e-20
ENSG00000114391.12|mRNA|RPL24|ENSG00000114391.12|ENSG00000114391.12|0|2682	-1.76958	8.50098	113.449	2.08311e-22	6.49183e-20
ENSG00000125691.12|mRNA|RPL23|ENSG00000125691.12|ENSG00000125691.12|0|5979	-1.80396	9.17234	112.885	2.54842e-22	7.81972e-20
ENSG00000008988.9|mRNA|RPS20|ENSG00000008988.9|ENSG00000008988.9|0|3002	-1.5066	9.22527	111.859	3.68025e-22	1.11216e-19
ENSG00000197958.12|mRNA|RPL12|ENSG00000197958.12|ENSG00000197958.12|0|2452	-1.77182	9.39185	111.586	4.05775e-22	1.20794e-19
ENSG00000172053.17|mRNA|QARS|ENSG00000172053.17|ENSG00000172053.17|0|4708	-1.81535	6.23919	111.396	4.34401e-22	1.27414e-19
ENSG00000260342.2|mRNA|AC138811.2|ENSG00000260342.2|ENSG00000260342.2|0|764	-1.26297	9.15472	111.116	4.80352e-22	1.3885e-19
ENSG00000083845.8|mRNA|RPS5|ENSG00000083845.8|ENSG00000083845.8|0|3617	-1.81463	7.79379	110.879	5.23178e-22	1.49068e-19
ENSG00000206596.1|snRNA|RNU1-27P|ENSG00000206596.1|ENSG00000206596.1|0|164	-3.16749	4.70704	110.755	5.46952e-22	1.53647e-19
ENSG00000108298.9|mRNA|RPL19|ENSG00000108298.9|ENSG00000108298.9|0|2368	-1.74224	10.5856	110.386	6.24566e-22	1.73013e-19
ENSG00000175390.13|mRNA|EIF3F|ENSG00000175390.13|ENSG00000175390.13|0|9431	-1.81998	6.64713	110.018	7.1308e-22	1.94827e-19
ENSG00000102317.17|mRNA|RBM3|ENSG00000102317.17|ENSG00000102317.17|0|3731	-1.72838	5.87264	109.614	8.24977e-22	2.22354e-19
ENSG00000128989.10|mRNA|ARPP19|ENSG00000128989.10|ENSG00000128989.10|0|6917	1.49615	8.07562	109.531	8.50021e-22	2.26049e-19
ENSG00000270800.2|mRNA|RPS10-NUDT3|ENSG00000270800.2|ENSG00000270800.2|0|5018	-1.31258	9.43907	109.326	9.15334e-22	2.40215e-19
ENSG00000169230.9|mRNA|PRELID1|ENSG00000169230.9|ENSG00000169230.9|0|1875	-1.70681	6.36362	109.127	9.83448e-22	2.54739e-19
ENSG00000117394.20|mRNA|SLC2A1|ENSG00000117394.20|ENSG00000117394.20|0|4721	-3.09161	5.6364	108.15	1.40064e-21	3.5815e-19
ENSG00000260836.1|mRNA|AC245033.1|ENSG00000260836.1|ENSG00000260836.1|0|880	-1.85211	8.15068	107.781	1.6009e-21	4.04177e-19
ENSG00000178982.9|mRNA|EIF3K|ENSG00000178982.9|ENSG00000178982.9|0|2798	-1.73934	6.28173	107.558	1.73548e-21	4.32677e-19
ENSG00000155463.12|mRNA|OXA1L|ENSG00000155463.12|ENSG00000155463.12|0|4497	-1.81294	5.50749	105.994	3.06397e-21	7.54457e-19
ENSG00000142676.12|mRNA|RPL11|ENSG00000142676.12|ENSG00000142676.12|0|1987	-1.72804	9.26143	105.832	3.25077e-21	7.9069e-19
ENSG00000130811.11|mRNA|EIF3G|ENSG00000130811.11|ENSG00000130811.11|0|3486	-1.59493	6.8517	104.789	4.75579e-21	1.14282e-18
ENSG00000152234.15|mRNA|ATP5A1|ENSG00000152234.15|ENSG00000152234.15|0|10908	-1.64692	6.74478	104.372	5.5406e-21	1.31556e-18
ENSG00000104408.9|mRNA|EIF3E|ENSG00000104408.9|ENSG00000104408.9|0|6005	-1.48396	8.06661	103.731	7.00649e-21	1.64405e-18
ENSG00000173848.18|mRNA|NET1|ENSG00000173848.18|ENSG00000173848.18|0|4175	-2.16349	6.81325	103.385	7.95334e-21	1.83558e-18
ENSG00000131469.12|mRNA|RPL27|ENSG00000131469.12|ENSG00000131469.12|0|2026	-1.72987	8.82794	103.367	8.0068e-21	1.83558e-18
ENSG00000100353.17|mRNA|EIF3D|ENSG00000100353.17|ENSG00000100353.17|0|4070	-1.46777	7.15948	102.322	1.17549e-20	2.66422e-18
ENSG00000163220.10|mRNA|S100A9|ENSG00000163220.10|ENSG00000163220.10|0|577	-2.08361	7.78974	102.032	1.30785e-20	2.93091e-18
ENSG00000125538.11|mRNA|IL1B|ENSG00000125538.11|ENSG00000125538.11|0|3096	-2.5796	3.37348	101.631	1.51609e-20	3.35983e-18
ENSG00000175061.17|lncRNA|LRRC75A-AS1|ENSG00000175061.17|ENSG00000175061.17|0|3759	-1.90727	5.53478	101.506	1.58748e-20	3.47936e-18
ENSG00000197956.9|mRNA|S100A6|ENSG00000197956.9|ENSG00000197956.9|0|971	-1.64465	6.85039	101.321	1.69979e-20	3.68502e-18
ENSG00000250479.8|mRNA|CHCHD10|ENSG00000250479.8|ENSG00000250479.8|0|1360	-1.88942	4.95831	101.224	1.76177e-20	3.77834e-18
ENSG00000102103.15|mRNA|PQBP1|ENSG00000102103.15|ENSG00000102103.15|0|1903	-1.77568	4.93945	101.182	1.78924e-20	3.79642e-18
ENSG00000145592.13|mRNA|RPL37|ENSG00000145592.13|ENSG00000145592.13|0|8153	-1.64444	8.69986	101.033	1.89047e-20	3.96899e-18
ENSG00000137818.11|mRNA|RPLP1|ENSG00000137818.11|ENSG00000137818.11|0|3271	-1.64297	9.07073	100.894	1.98949e-20	4.13337e-18
ENSG00000144713.12|mRNA|RPL32|ENSG00000144713.12|ENSG00000144713.12|0|3720	-1.77866	8.87552	100.844	2.02646e-20	4.16677e-18
ENSG00000147677.10|mRNA|EIF3H|ENSG00000147677.10|ENSG00000147677.10|0|6434	-1.37821	7.82217	100.686	2.14857e-20	4.37278e-18
ENSG00000039560.13|mRNA|RAI14|ENSG00000039560.13|ENSG00000039560.13|0|7687	-2.76876	4.6384	100.526	2.27945e-20	4.59229e-18
ENSG00000117091.9|mRNA|CD48|ENSG00000117091.9|ENSG00000117091.9|0|3274	-1.72147	6.68452	99.8141	2.9668e-20	5.88336e-18
ENSG00000011600.11|mRNA|TYROBP|ENSG00000011600.11|ENSG00000011600.11|0|907	-1.64671	7.09125	99.8027	2.97929e-20	5.88336e-18
ENSG00000257267.3|pseudogene|ZNF271P|ENSG00000257267.3|ENSG00000257267.3|0|7450	1.78624	7.64735	99.5217	3.30642e-20	6.41028e-18
ENSG00000164713.9|mRNA|BRI3|ENSG00000164713.9|ENSG00000164713.9|0|5139	-1.98656	4.31652	99.5184	3.3104e-20	6.41028e-18
ENSG00000157554.18|mRNA|ERG|ENSG00000157554.18|ENSG00000157554.18|0|7588	-2.37136	6.42238	99.4841	3.35281e-20	6.42998e-18
ENSG00000100316.15|mRNA|RPL3|ENSG00000100316.15|ENSG00000100316.15|0|4787	-1.72688	10.359	99.281	3.61508e-20	6.86693e-18
ENSG00000109475.16|mRNA|RPL34|ENSG00000109475.16|ENSG00000109475.16|0|3393	-1.66833	8.67827	97.9377	5.95634e-20	1.12075e-17
ENSG00000143546.9|mRNA|S100A8|ENSG00000143546.9|ENSG00000143546.9|0|1006	-2.03003	7.93039	97.8691	6.11049e-20	1.13901e-17
hsa_circ_0001730|circRNA|hsa_circ_0001730|hsa_circ_0001730|hsa_circ_0001730|0|600	-3.2554	2.56675	97.7034	6.49961e-20	1.20032e-17
ENSG00000206588.1|snRNA|RNU1-28P|ENSG00000206588.1|ENSG00000206588.1|0|164	-3.35607	7.17892	97.6021	6.74962e-20	1.2272e-17
ENSG00000204287.13|mRNA|HLA-DRA|ENSG00000204287.13|ENSG00000204287.13|0|1280	-1.86219	7.34681	97.5947	6.76822e-20	1.2272e-17
ENSG00000162244.10|mRNA|RPL29|ENSG00000162244.10|ENSG00000162244.10|0|1912	-1.67708	8.37665	97.3885	7.30922e-20	1.31335e-17
ENSG00000177600.8|mRNA|RPLP2|ENSG00000177600.8|ENSG00000177600.8|0|1955	-1.83953	9.65629	97.3315	7.46632e-20	1.32961e-17
ENSG00000122026.10|mRNA|RPL21|ENSG00000122026.10|ENSG00000122026.10|0|2249	-1.56019	9.13748	97.1571	7.96819e-20	1.40642e-17
ENSG00000116251.9|mRNA|RPL22|ENSG00000116251.9|ENSG00000116251.9|0|4900	-1.52863	9.32373	97.0851	8.18541e-20	1.43209e-17
ENSG00000272168.6|lncRNA|CASC15|ENSG00000272168.6|ENSG00000272168.6|0|13289	2.12838	5.84245	97.0112	8.41421e-20	1.45932e-17
ENSG00000162298.18|mRNA|SYVN1|ENSG00000162298.18|ENSG00000162298.18|0|5496	-1.54134	7.56372	96.8857	8.81792e-20	1.51615e-17
ENSG00000075790.10|mRNA|BCAP29|ENSG00000075790.10|ENSG00000075790.10|0|8409	1.57342	6.21424	96.5315	1.00659e-19	1.70447e-17
ENSG00000172340.14|mRNA|SUCLG2|ENSG00000172340.14|ENSG00000172340.14|0|3090	-1.49228	4.93747	96.5267	1.00841e-19	1.70447e-17
ENSG00000267009.6|lncRNA|AC007780.1|ENSG00000267009.6|ENSG00000267009.6|0|1863	1.49356	10.3455	96.3133	1.09216e-19	1.83052e-17
ENSG00000234961.1|lncRNA|AL133415.1|ENSG00000234961.1|ENSG00000234961.1|0|706	-2.23269	4.48925	96.2733	1.10864e-19	1.84265e-17
ENSG00000234741.7|lncRNA|GAS5|ENSG00000234741.7|ENSG00000234741.7|0|3631	-1.77866	5.74668	95.645	1.40272e-19	2.31079e-17
ENSG00000161940.10|mRNA|BCL6B|ENSG00000161940.10|ENSG00000161940.10|0|4373	-2.6645	4.52476	95.6246	1.41347e-19	2.31079e-17
ENSG00000105372.6|mRNA|RPS19|ENSG00000105372.6|ENSG00000105372.6|0|3805	-1.79472	8.84789	95.4819	1.49118e-19	2.41802e-17
ENSG00000078618.21|mRNA|NRDC|ENSG00000078618.21|ENSG00000078618.21|0|6773	1.52975	9.31385	95.3781	1.55033e-19	2.49366e-17
ENSG00000263809.1|mRNA|AC135178.2|ENSG00000263809.1|ENSG00000263809.1|0|3087	-1.50381	10.2456	95.1775	1.6715e-19	2.65083e-17
ENSG00000174444.14|mRNA|RPL4|ENSG00000174444.14|ENSG00000174444.14|0|5637	-1.27065	10.2473	95.1726	1.67463e-19	2.65083e-17
ENSG00000161970.12|mRNA|RPL26|ENSG00000161970.12|ENSG00000161970.12|0|2472	-1.50459	10.2443	95.1185	1.70896e-19	2.68302e-17
ENSG00000108946.14|mRNA|PRKAR1A|ENSG00000108946.14|ENSG00000108946.14|0|6821	1.46417	10.669	95.0985	1.72187e-19	2.68302e-17
ENSG00000116288.12|mRNA|PARK7|ENSG00000116288.12|ENSG00000116288.12|0|2397	1.29473	8.23452	94.8623	1.88153e-19	2.90907e-17
ENSG00000147526.19|mRNA|TACC1|ENSG00000147526.19|ENSG00000147526.19|0|12609	1.11327	7.68313	94.8238	1.90891e-19	2.92871e-17
ENSG00000079841.18|mRNA|RIMS1|ENSG00000079841.18|ENSG00000079841.18|0|12788	-3.41003	1.82632	94.7732	1.9456e-19	2.96221e-17
ENSG00000104529.17|mRNA|EEF1D|ENSG00000104529.17|ENSG00000104529.17|0|9390	-1.66506	8.75561	94.5125	2.14584e-19	3.24234e-17
ENSG00000182899.14|mRNA|RPL35A|ENSG00000182899.14|ENSG00000182899.14|0|2977	-1.22519	7.91739	94.4724	2.1785e-19	3.26693e-17
ENSG00000220804.8|pseudogene|LINC01881|ENSG00000220804.8|ENSG00000220804.8|0|1931	1.55283	6.93705	94.1626	2.44771e-19	3.6332e-17
ENSG00000188846.13|mRNA|RPL14|ENSG00000188846.13|ENSG00000188846.13|0|8626	-1.54069	9.16165	94.1502	2.45917e-19	3.6332e-17
ENSG00000134333.13|mRNA|LDHA|ENSG00000134333.13|ENSG00000134333.13|0|6210	-1.36878	6.29012	94.0137	2.58888e-19	3.79671e-17
ENSG00000125991.19|mRNA|ERGIC3|ENSG00000125991.19|ENSG00000125991.19|0|6012	-1.64882	5.63441	93.8327	2.77152e-19	4.03489e-17
ENSG00000149823.8|mRNA|VPS51|ENSG00000149823.8|ENSG00000149823.8|0|4878	-1.83526	4.66542	93.6632	2.95423e-19	4.26971e-17
ENSG00000189403.14|mRNA|HMGB1|ENSG00000189403.14|ENSG00000189403.14|0|7723	1.50685	11.0365	93.5799	3.04854e-19	4.37432e-17
ENSG00000173442.12|mRNA|EHBP1L1|ENSG00000173442.12|ENSG00000173442.12|0|6741	-2.01375	6.42664	93.5103	3.12951e-19	4.45844e-17
ENSG00000198242.13|mRNA|RPL23A|ENSG00000198242.13|ENSG00000198242.13|0|2824	-1.629	9.96236	93.4649	3.18357e-19	4.50328e-17
ENSG00000163931.15|mRNA|TKT|ENSG00000163931.15|ENSG00000163931.15|0|9507	-1.68028	7.46769	93.3799	3.28724e-19	4.61719e-17
ENSG00000111144.9|mRNA|LTA4H|ENSG00000111144.9|ENSG00000111144.9|0|7350	-1.64154	6.70333	93.3026	3.38458e-19	4.72066e-17
hsa_circ_0055020|circRNA|hsa_circ_0055020|hsa_circ_0055020|hsa_circ_0055020|0|600	3.68744	2.7705	92.5091	4.5673e-19	6.32603e-17
ENSG00000152082.13|mRNA|MZT2B|ENSG00000152082.13|ENSG00000152082.13|0|1815	-1.94958	4.16992	92.2959	4.95082e-19	6.80994e-17
ENSG00000130741.10|mRNA|EIF2S3|ENSG00000130741.10|ENSG00000130741.10|0|3472	-1.37752	7.33431	92.2754	4.98943e-19	6.81604e-17
ENSG00000105993.14|mRNA|DNAJB6|ENSG00000105993.14|ENSG00000105993.14|0|14981	1.60743	9.7101	92.2187	5.09757e-19	6.9164e-17
ENSG00000178035.11|mRNA|IMPDH2|ENSG00000178035.11|ENSG00000178035.11|0|2773	-1.78402	5.60494	92.17	5.19241e-19	6.99747e-17
ENSG00000146278.10|mRNA|PNRC1|ENSG00000146278.10|ENSG00000146278.10|0|2992	-1.67997	7.80287	92.0794	5.37363e-19	7.19309e-17
ENSG00000034713.7|mRNA|GABARAPL2|ENSG00000034713.7|ENSG00000034713.7|0|3034	1.302	8.71141	91.9661	5.60921e-19	7.45838e-17
ENSG00000241343.9|mRNA|RPL36A|ENSG00000241343.9|ENSG00000241343.9|0|3964	-1.44387	9.0387	91.8369	5.8904e-19	7.78039e-17
ENSG00000102401.19|mRNA|ARMCX3|ENSG00000102401.19|ENSG00000102401.19|0|4239	1.58011	7.22238	91.6802	6.25085e-19	8.20219e-17
ENSG00000169567.11|mRNA|HINT1|ENSG00000169567.11|ENSG00000169567.11|0|1936	-1.85475	5.19937	91.6463	6.33176e-19	8.25405e-17
ENSG00000135486.17|mRNA|HNRNPA1|ENSG00000135486.17|ENSG00000135486.17|0|5093	-1.32861	9.63408	91.6201	6.39478e-19	8.28207e-17
ENSG00000164587.11|mRNA|RPS14|ENSG00000164587.11|ENSG00000164587.11|0|4544	-1.70182	7.9459	91.3782	7.0092e-19	9.01926e-17
ENSG00000063046.17|mRNA|EIF4B|ENSG00000063046.17|ENSG00000063046.17|0|6146	-1.39857	9.01702	91.131	7.69853e-19	9.84277e-17
ENSG00000146963.17|mRNA|LUC7L2|ENSG00000146963.17|ENSG00000146963.17|0|6316	1.5726	9.67545	90.9728	8.17505e-19	1.03272e-16
ENSG00000084754.10|mRNA|HADHA|ENSG00000084754.10|ENSG00000084754.10|0|3811	-1.40154	6.88108	90.9709	8.18095e-19	1.03272e-16
ENSG00000173113.6|mRNA|TRMT112|ENSG00000173113.6|ENSG00000173113.6|0|1625	-1.52597	5.524	90.6888	9.10668e-19	1.14234e-16
ENSG00000115875.18|mRNA|SRSF7|ENSG00000115875.18|ENSG00000115875.18|0|4045	-1.56588	5.32398	90.6207	9.34533e-19	1.16495e-16
ENSG00000134986.13|mRNA|NREP|ENSG00000134986.13|ENSG00000134986.13|0|9337	1.61334	5.8126	90.43	1.0048e-18	1.23715e-16
ENSG00000185825.15|mRNA|BCAP31|ENSG00000185825.15|ENSG00000185825.15|0|2624	1.84114	8.15176	90.4299	1.00486e-18	1.23715e-16
ENSG00000269955.2|mRNA|C7orf55-LUC7L2|ENSG00000269955.2|ENSG00000269955.2|0|1661	1.56698	9.64187	90.3595	1.03212e-18	1.26159e-16
ENSG00000257341.5|mRNA|AL928654.4|ENSG00000257341.5|ENSG00000257341.5|0|1408	-2.01514	5.48044	90.3462	1.03736e-18	1.26159e-16
hsa_circ_0002882|circRNA|hsa_circ_0002882|hsa_circ_0002882|hsa_circ_0002882|0|348	-3.439	0.817997	90.2188	1.08889e-18	1.31624e-16
hsa_circ_0075796|circRNA|hsa_circ_0075796|hsa_circ_0075796|hsa_circ_0075796|0|600	1.88418	5.02158	90.1892	1.10125e-18	1.32316e-16
ENSG00000213145.9|mRNA|CRIP1|ENSG00000213145.9|ENSG00000213145.9|0|2485	-2.01944	5.46322	90.0388	1.16613e-18	1.39272e-16
ENSG00000152291.13|mRNA|TGOLN2|ENSG00000152291.13|ENSG00000152291.13|0|7081	1.63222	6.8946	90.0126	1.1778e-18	1.39829e-16
ENSG00000172809.12|mRNA|RPL38|ENSG00000172809.12|ENSG00000172809.12|0|3829	-1.61544	8.95488	89.9617	1.20089e-18	1.41726e-16
ENSG00000081154.11|mRNA|PCNP|ENSG00000081154.11|ENSG00000081154.11|0|3102	1.41251	8.80889	89.6416	1.35665e-18	1.59167e-16
ENSG00000235162.8|mRNA|C12orf75|ENSG00000235162.8|ENSG00000235162.8|0|2693	1.54379	9.27081	89.5076	1.4278e-18	1.66535e-16
ENSG00000110090.12|mRNA|CPT1A|ENSG00000110090.12|ENSG00000110090.12|0|6565	1.51384	7.45381	89.4194	1.47661e-18	1.71227e-16
ENSG00000149100.12|mRNA|EIF3M|ENSG00000149100.12|ENSG00000149100.12|0|7428	-1.43295	6.69815	89.2486	1.57607e-18	1.81703e-16
ENSG00000145919.10|mRNA|BOD1|ENSG00000145919.10|ENSG00000145919.10|0|2018	-2.37249	2.82084	89.1798	1.61797e-18	1.85462e-16
ENSG00000110092.3|mRNA|CCND1|ENSG00000110092.3|ENSG00000110092.3|0|4830	-2.24891	4.56841	89.1421	1.64147e-18	1.87081e-16
ENSG00000100453.12|mRNA|GZMB|ENSG00000100453.12|ENSG00000100453.12|0|1411	-2.24844	5.8949	89.0917	1.67335e-18	1.8963e-16
ENSG00000129250.11|mRNA|KIF1C|ENSG00000129250.11|ENSG00000129250.11|0|8580	-2.18736	7.11566	88.8354	1.84543e-18	2.07949e-16
ENSG00000257529.5|mRNA|RPL36A-HNRNPH2|ENSG00000257529.5|ENSG00000257529.5|0|695	-1.34279	9.12885	88.7886	1.87873e-18	2.10512e-16
ENSG00000169925.16|mRNA|BRD3|ENSG00000169925.16|ENSG00000169925.16|0|6876	1.48097	7.98086	88.5619	2.04878e-18	2.28284e-16
ENSG00000108691.9|mRNA|CCL2|ENSG00000108691.9|ENSG00000108691.9|0|1986	-3.48835	2.15775	88.5252	2.07773e-18	2.30225e-16
ENSG00000109971.13|mRNA|HSPA8|ENSG00000109971.13|ENSG00000109971.13|0|4849	-1.42731	8.55618	88.4525	2.13632e-18	2.35408e-16
ENSG00000138411.10|mRNA|HECW2|ENSG00000138411.10|ENSG00000138411.10|0|12692	-2.40658	4.28891	88.4074	2.17354e-18	2.38193e-16
ENSG00000064042.17|mRNA|LIMCH1|ENSG00000064042.17|ENSG00000064042.17|0|10862	-2.29016	4.8809	88.2536	2.3053e-18	2.51252e-16
ENSG00000265681.7|mRNA|RPL17|ENSG00000265681.7|ENSG00000265681.7|0|2466	-1.54078	9.75311	88.1019	2.44311e-18	2.64825e-16
ENSG00000145632.14|mRNA|PLK2|ENSG00000145632.14|ENSG00000145632.14|0|4768	-2.51509	4.20872	87.8339	2.70722e-18	2.9164e-16
ENSG00000162817.6|mRNA|C1orf115|ENSG00000162817.6|ENSG00000162817.6|0|3413	-2.22117	4.49903	87.8219	2.71973e-18	2.9164e-16
ENSG00000117118.9|mRNA|SDHB|ENSG00000117118.9|ENSG00000117118.9|0|2462	-1.57733	5.14005	87.7193	2.82883e-18	3.01716e-16
ENSG00000149806.10|mRNA|FAU|ENSG00000149806.10|ENSG00000149806.10|0|1846	-1.54206	8.81652	87.5466	3.02243e-18	3.20651e-16
ENSG00000265491.4|mRNA|RNF115|ENSG00000265491.4|ENSG00000265491.4|0|11041	1.40619	7.29789	87.5078	3.0678e-18	3.23743e-16
ENSG00000133112.16|mRNA|TPT1|ENSG00000133112.16|ENSG00000133112.16|0|7269	-1.09094	11.1618	87.4633	3.12054e-18	3.27575e-16
ENSG00000076662.9|mRNA|ICAM3|ENSG00000076662.9|ENSG00000076662.9|0|2950	-1.79725	5.10163	87.4491	3.13761e-18	3.27642e-16
ENSG00000175324.9|mRNA|LSM1|ENSG00000175324.9|ENSG00000175324.9|0|1690	1.45769	6.65832	87.3041	3.31712e-18	3.44584e-16
ENSG00000102879.15|mRNA|CORO1A|ENSG00000102879.15|ENSG00000102879.15|0|4871	-1.67745	7.74688	87.1856	3.47149e-18	3.5875e-16
ENSG00000119636.15|mRNA|BBOF1|ENSG00000119636.15|ENSG00000119636.15|0|4620	1.49817	7.06025	87.0825	3.61168e-18	3.71314e-16
ENSG00000105373.18|mRNA|NOP53|ENSG00000105373.18|ENSG00000105373.18|0|5341	-1.73119	8.42422	86.9581	3.78851e-18	3.87496e-16
ENSG00000125743.10|mRNA|SNRPD2|ENSG00000125743.10|ENSG00000125743.10|0|1608	-1.85399	4.8731	86.9063	3.86465e-18	3.93267e-16
ENSG00000196683.10|mRNA|TOMM7|ENSG00000196683.10|ENSG00000196683.10|0|1751	-1.57051	6.00827	86.8348	3.97223e-18	4.02163e-16
ENSG00000137845.14|mRNA|ADAM10|ENSG00000137845.14|ENSG00000137845.14|0|16168	1.47358	7.99678	86.7852	4.0487e-18	4.07835e-16
ENSG00000182220.14|mRNA|ATP6AP2|ENSG00000182220.14|ENSG00000182220.14|0|9560	1.5121	6.64715	86.7502	4.10356e-18	4.11284e-16
ENSG00000280571.1|mRNA|AC099329.3|ENSG00000280571.1|ENSG00000280571.1|0|602	1.43309	8.13409	86.5888	4.36633e-18	4.35432e-16
ENSG00000077312.8|mRNA|SNRPA|ENSG00000077312.8|ENSG00000077312.8|0|2361	-2.11748	3.43479	86.5747	4.39006e-18	4.35621e-16
ENSG00000235288.3|lncRNA|AC099329.1|ENSG00000235288.3|ENSG00000235288.3|0|1956	1.44876	8.15878	86.528	4.46965e-18	4.39238e-16
ENSG00000128595.16|mRNA|CALU|ENSG00000128595.16|ENSG00000128595.16|0|4537	1.69512	7.19628	86.5274	4.47056e-18	4.39238e-16
ENSG00000145741.15|mRNA|BTF3|ENSG00000145741.15|ENSG00000145741.15|0|2467	-1.08147	7.89299	86.4367	4.62943e-18	4.52022e-16
ENSG00000136490.8|mRNA|LIMD2|ENSG00000136490.8|ENSG00000136490.8|0|4745	-1.65751	5.66097	86.4274	4.646e-18	4.52022e-16
ENSG00000171700.13|mRNA|RGS19|ENSG00000171700.13|ENSG00000171700.13|0|2028	-1.81742	4.58198	86.303	4.87379e-18	4.71882e-16
ENSG00000165476.13|mRNA|REEP3|ENSG00000165476.13|ENSG00000165476.13|0|5248	1.39237	5.7187	86.2022	5.06651e-18	4.88172e-16
ENSG00000240247.7|mRNA|DEFA1B|ENSG00000240247.7|ENSG00000240247.7|0|491	-3.07851	5.78995	86.0732	5.32466e-18	5.10578e-16
ENSG00000181061.13|mRNA|HIGD1A|ENSG00000181061.13|ENSG00000181061.13|0|1675	1.44499	8.12897	85.9512	5.5809e-18	5.32589e-16
ENSG00000137033.11|mRNA|IL33|ENSG00000137033.11|ENSG00000137033.11|0|3253	-3.05751	3.02964	85.9193	5.64994e-18	5.3661e-16
ENSG00000163631.16|mRNA|ALB|ENSG00000163631.16|ENSG00000163631.16|0|3377	-3.69658	8.13724	85.8435	5.81736e-18	5.49892e-16
hsa_circ_0086425|circRNA|hsa_circ_0086425|hsa_circ_0086425|hsa_circ_0086425|0|600	3.04185	3.37417	85.6847	6.18471e-18	5.81858e-16
ENSG00000168961.16|mRNA|LGALS9|ENSG00000168961.16|ENSG00000168961.16|0|5714	-1.67602	5.80434	85.5876	6.42052e-18	6.01208e-16
ENSG00000130313.6|mRNA|PGLS|ENSG00000130313.6|ENSG00000130313.6|0|2847	-1.9885	4.33751	85.518	6.59517e-18	6.14676e-16
ENSG00000117450.13|mRNA|PRDX1|ENSG00000117450.13|ENSG00000117450.13|0|1522	-1.51186	5.17381	85.4999	6.64136e-18	6.16102e-16
ENSG00000117640.17|mRNA|MTFR1L|ENSG00000117640.17|ENSG00000117640.17|0|5817	1.64637	6.78567	85.4736	6.70924e-18	6.19517e-16
ENSG00000120727.12|mRNA|PAIP2|ENSG00000120727.12|ENSG00000120727.12|0|3158	1.39876	10.2123	85.4215	6.84536e-18	6.29174e-16
ENSG00000215472.10|mRNA|RPL17-C18orf32|ENSG00000215472.10|ENSG00000215472.10|0|1529	-1.42643	9.82799	85.2274	7.37816e-18	6.75034e-16
ENSG00000268173.3|mRNA|AC007192.1|ENSG00000268173.3|ENSG00000268173.3|0|5142	-1.66158	7.14967	85.1725	7.53614e-18	6.86339e-16
ENSG00000139597.17|mRNA|N4BP2L1|ENSG00000139597.17|ENSG00000139597.17|0|6053	1.49529	6.25701	85.046	7.91333e-18	7.17415e-16
ENSG00000100092.20|mRNA|SH3BP1|ENSG00000100092.20|ENSG00000100092.20|0|6170	-1.79431	5.49688	85.007	8.03341e-18	7.25006e-16
ENSG00000081189.15|mRNA|MEF2C|ENSG00000081189.15|ENSG00000081189.15|0|11755	1.26333	8.65046	84.8748	8.45464e-18	7.59584e-16
ENSG00000102007.10|mRNA|PLP2|ENSG00000102007.10|ENSG00000102007.10|0|1279	-1.50459	5.87348	84.6725	9.14248e-18	8.17699e-16
ENSG00000161057.11|mRNA|PSMC2|ENSG00000161057.11|ENSG00000161057.11|0|3547	-1.39934	5.39342	84.5452	9.6037e-18	8.55115e-16
ENSG00000108953.16|mRNA|YWHAE|ENSG00000108953.16|ENSG00000108953.16|0|3847	1.46782	10.2324	84.4961	9.78814e-18	8.64098e-16
ENSG00000182487.12|pseudogene|NCF1B|ENSG00000182487.12|ENSG00000182487.12|0|1902	-1.68627	5.95492	84.4952	9.79123e-18	8.64098e-16
ENSG00000064989.12|mRNA|CALCRL|ENSG00000064989.12|ENSG00000064989.12|0|6144	-2.47646	3.24425	84.4353	1.0021e-17	8.8048e-16
ENSG00000075415.12|mRNA|SLC25A3|ENSG00000075415.12|ENSG00000075415.12|0|8896	-1.17457	6.13086	84.3924	1.01889e-17	8.91307e-16
ENSG00000108561.8|mRNA|C1QBP|ENSG00000108561.8|ENSG00000108561.8|0|2335	-1.63913	5.52765	84.2239	1.08757e-17	9.47231e-16
ENSG00000249751.3|mRNA|ECSCR|ENSG00000249751.3|ENSG00000249751.3|0|1035	-2.36221	4.28933	84.1098	1.13669e-17	9.85712e-16
ENSG00000180398.11|mRNA|MCFD2|ENSG00000180398.11|ENSG00000180398.11|0|5994	1.46046	5.74085	83.972	1.19903e-17	1.03527e-15
ENSG00000145495.15|mRNA|MARCH6|ENSG00000145495.15|ENSG00000145495.15|0|11336	1.53934	8.69772	83.8312	1.26628e-17	1.08862e-15
ENSG00000198168.8|mRNA|SVIP|ENSG00000198168.8|ENSG00000198168.8|0|5263	1.45059	7.91961	83.6123	1.37845e-17	1.17997e-15
ENSG00000223865.10|mRNA|HLA-DPB1|ENSG00000223865.10|ENSG00000223865.10|0|2791	-1.43221	7.14965	83.5747	1.39871e-17	1.19219e-15
ENSG00000279686.1|mRNA|AC142391.1|ENSG00000279686.1|ENSG00000279686.1|0|1002	-2.36132	4.31589	83.5614	1.40596e-17	1.19327e-15
ENSG00000099875.14|mRNA|MKNK2|ENSG00000099875.14|ENSG00000099875.14|0|5221	-1.72954	5.95322	83.3446	1.52939e-17	1.29253e-15
ENSG00000105559.11|mRNA|PLEKHA4|ENSG00000105559.11|ENSG00000105559.11|0|3851	-3.14304	2.65266	83.2756	1.57088e-17	1.32199e-15
ENSG00000165283.15|mRNA|STOML2|ENSG00000165283.15|ENSG00000165283.15|0|1806	-1.59872	4.15876	83.1866	1.62615e-17	1.36275e-15
ENSG00000171033.12|mRNA|PKIA|ENSG00000171033.12|ENSG00000171033.12|0|4216	2.03122	6.18913	83.1626	1.64135e-17	1.36974e-15
ENSG00000164346.9|mRNA|NSA2|ENSG00000164346.9|ENSG00000164346.9|0|4962	-1.56644	7.19966	82.993	1.75316e-17	1.45695e-15
ENSG00000070423.17|mRNA|RNF126|ENSG00000070423.17|ENSG00000070423.17|0|3496	-1.94365	3.87126	82.9767	1.76432e-17	1.46014e-15
ENSG00000152492.13|mRNA|CCDC50|ENSG00000152492.13|ENSG00000152492.13|0|9202	-1.95281	6.77005	82.9039	1.81491e-17	1.4958e-15
hsa_circ_0046842|circRNA|hsa_circ_0046842|hsa_circ_0046842|hsa_circ_0046842|0|600	2.68814	4.32391	82.7957	1.89295e-17	1.5537e-15
ENSG00000250722.5|mRNA|SELENOP|ENSG00000250722.5|ENSG00000250722.5|0|5688	-2.40172	4.2932	82.6529	2.00103e-17	1.63568e-15
ENSG00000104763.18|mRNA|ASAH1|ENSG00000104763.18|ENSG00000104763.18|0|15378	1.90829	9.66857	82.5589	2.07556e-17	1.68967e-15
ENSG00000173457.10|mRNA|PPP1R14B|ENSG00000173457.10|ENSG00000173457.10|0|1655	-2.119	4.18139	82.52	2.10718e-17	1.70845e-15
ENSG00000149516.13|mRNA|MS4A3|ENSG00000149516.13|ENSG00000149516.13|0|2095	-3.40211	3.19153	82.4409	2.17312e-17	1.75477e-15
ENSG00000240972.1|mRNA|MIF|ENSG00000240972.1|ENSG00000240972.1|0|1109	-1.54866	4.78471	82.1017	2.48001e-17	1.99451e-15
ENSG00000143222.11|mRNA|UFC1|ENSG00000143222.11|ENSG00000143222.11|0|2274	-1.22247	5.27867	82.0336	2.54668e-17	2.0399e-15
ENSG00000216490.3|mRNA|IFI30|ENSG00000216490.3|ENSG00000216490.3|0|2481	-1.66053	7.02372	82.0046	2.57567e-17	2.05487e-15
ENSG00000121766.15|mRNA|ZCCHC17|ENSG00000121766.15|ENSG00000121766.15|0|1921	1.69901	9.02839	81.922	2.65989e-17	2.11361e-15
ENSG00000179091.4|mRNA|CYC1|ENSG00000179091.4|ENSG00000179091.4|0|1975	-1.95763	3.93751	81.637	2.97259e-17	2.35271e-15
ENSG00000177954.11|mRNA|RPS27|ENSG00000177954.11|ENSG00000177954.11|0|946	-1.45886	9.33548	81.6069	3.00778e-17	2.37115e-15
ENSG00000154240.16|mRNA|CEP112|ENSG00000154240.16|ENSG00000154240.16|0|7849	-2.10316	4.92852	81.5669	3.05499e-17	2.39078e-15
ENSG00000244528.1|pseudogene|SEPT14P2|ENSG00000244528.1|ENSG00000244528.1|0|183	1.60759	6.08139	81.5656	3.05666e-17	2.39078e-15
ENSG00000122545.18|mRNA|SEPT7|ENSG00000122545.18|ENSG00000122545.18|0|10906	1.43464	11.1139	81.5112	3.12222e-17	2.43253e-15
ENSG00000151327.12|mRNA|FAM177A1|ENSG00000151327.12|ENSG00000151327.12|0|8385	1.50722	7.67592	81.3322	3.34814e-17	2.59303e-15
ENSG00000138758.11|mRNA|SEPT11|ENSG00000138758.11|ENSG00000138758.11|0|9787	1.8181	9.21104	81.3276	3.35424e-17	2.59303e-15
ENSG00000121691.4|mRNA|CAT|ENSG00000121691.4|ENSG00000121691.4|0|3347	-1.58535	6.65722	81.132	3.62059e-17	2.78121e-15
ENSG00000213741.9|mRNA|RPS29|ENSG00000213741.9|ENSG00000213741.9|0|9743	-1.75075	6.34528	81.1285	3.62555e-17	2.78121e-15
ENSG00000104164.10|mRNA|BLOC1S6|ENSG00000104164.10|ENSG00000104164.10|0|6812	1.61141	8.32299	81.1085	3.65394e-17	2.79225e-15
ENSG00000108106.13|mRNA|UBE2S|ENSG00000108106.13|ENSG00000108106.13|0|2788	-1.97362	3.57794	81.0221	3.77938e-17	2.87709e-15
ENSG00000147123.10|mRNA|NDUFB11|ENSG00000147123.10|ENSG00000147123.10|0|1418	-1.51131	4.41508	80.9945	3.82045e-17	2.89729e-15
ENSG00000069966.18|mRNA|GNB5|ENSG00000069966.18|ENSG00000069966.18|0|13302	1.727	7.761	80.9684	3.85965e-17	2.90544e-15
ENSG00000107829.13|mRNA|FBXW4|ENSG00000107829.13|ENSG00000107829.13|0|5038	-1.70984	4.37668	80.9679	3.86033e-17	2.90544e-15
ENSG00000117318.8|mRNA|ID3|ENSG00000117318.8|ENSG00000117318.8|0|1797	-2.72338	2.75845	80.9475	3.89128e-17	2.91773e-15
ENSG00000113638.13|mRNA|TTC33|ENSG00000113638.13|ENSG00000113638.13|0|6821	1.90005	7.72459	80.7603	4.1869e-17	3.12763e-15
hsa_circ_0000117|circRNA|hsa_circ_0000117|hsa_circ_0000117|hsa_circ_0000117|0|600	1.39301	7.40674	80.7507	4.20266e-17	3.12769e-15
ENSG00000117519.15|mRNA|CNN3|ENSG00000117519.15|ENSG00000117519.15|0|2838	-2.42598	3.96522	80.7127	4.26562e-17	3.16274e-15
ENSG00000162722.8|mRNA|TRIM58|ENSG00000162722.8|ENSG00000162722.8|0|3225	1.52585	9.56562	80.662	4.35106e-17	3.21414e-15
ENSG00000131778.18|mRNA|CHD1L|ENSG00000131778.18|ENSG00000131778.18|0|3376	1.36136	7.62702	80.5752	4.50128e-17	3.31284e-15
ENSG00000154310.16|mRNA|TNIK|ENSG00000154310.16|ENSG00000154310.16|0|8523	1.58721	8.54574	80.541	4.56201e-17	3.3452e-15
ENSG00000018408.14|mRNA|WWTR1|ENSG00000018408.14|ENSG00000018408.14|0|8413	-2.13846	5.11115	80.507	4.62316e-17	3.37762e-15
ENSG00000166794.4|mRNA|PPIB|ENSG00000166794.4|ENSG00000166794.4|0|1911	-1.42025	5.8817	80.4561	4.71618e-17	3.433e-15
ENSG00000179195.15|mRNA|ZNF664|ENSG00000179195.15|ENSG00000179195.15|0|6340	1.42454	6.34633	80.4273	4.76971e-17	3.45934e-15
ENSG00000149600.11|mRNA|COMMD7|ENSG00000149600.11|ENSG00000149600.11|0|2584	1.17886	6.82029	80.3994	4.82211e-17	3.48467e-15
ENSG00000247556.6|lncRNA|OIP5-AS1|ENSG00000247556.6|ENSG00000247556.6|0|12673	1.21815	5.8098	80.2903	5.03249e-17	3.62358e-15
ENSG00000166681.13|mRNA|BEX3|ENSG00000166681.13|ENSG00000166681.13|0|1080	1.75769	9.71364	80.2598	5.09297e-17	3.65393e-15
ENSG00000100097.11|mRNA|LGALS1|ENSG00000100097.11|ENSG00000100097.11|0|1099	-1.68704	5.53237	80.2396	5.13353e-17	3.66983e-15
ENSG00000111639.7|mRNA|MRPL51|ENSG00000111639.7|ENSG00000111639.7|0|1551	-1.65704	4.85462	80.214	5.18523e-17	3.69355e-15
ENSG00000204482.10|mRNA|LST1|ENSG00000204482.10|ENSG00000204482.10|0|2281	-1.51714	6.71327	80.0203	5.59421e-17	3.97069e-15
ENSG00000147274.14|mRNA|RBMX|ENSG00000147274.14|ENSG00000147274.14|0|5882	-1.17615	6.65698	79.9131	5.83435e-17	4.12646e-15
ENSG00000168385.17|mRNA|SEPT2|ENSG00000168385.17|ENSG00000168385.17|0|7378	1.36515	9.16915	79.7979	6.10397e-17	4.3019e-15
ENSG00000148516.21|mRNA|ZEB1|ENSG00000148516.21|ENSG00000148516.21|0|8650	-1.87507	7.20355	79.7744	6.16064e-17	4.32655e-15
ENSG00000174748.18|mRNA|RPL15|ENSG00000174748.18|ENSG00000174748.18|0|6528	-1.20679	8.76562	79.7325	6.2628e-17	4.38286e-15
ENSG00000143622.10|mRNA|RIT1|ENSG00000143622.10|ENSG00000143622.10|0|3919	1.65921	7.83917	79.6367	6.50265e-17	4.5348e-15
ENSG00000196531.10|mRNA|NACA|ENSG00000196531.10|ENSG00000196531.10|0|10008	-1.44883	10.4253	79.5695	6.67649e-17	4.63981e-15
ENSG00000146731.10|mRNA|CCT6A|ENSG00000146731.10|ENSG00000146731.10|0|3901	-1.32846	6.22561	79.5503	6.72701e-17	4.65869e-15
ENSG00000100614.17|mRNA|PPM1A|ENSG00000100614.17|ENSG00000100614.17|0|11860	1.40616	8.77681	79.5373	6.76134e-17	4.66626e-15
ENSG00000274874.1|mRNA|AC068790.8|ENSG00000274874.1|ENSG00000274874.1|0|504	1.44151	5.90444	79.4889	6.891e-17	4.73533e-15
ENSG00000176046.8|mRNA|NUPR1|ENSG00000176046.8|ENSG00000176046.8|0|5674	-2.8531	2.55531	79.4823	6.9089e-17	4.73533e-15
ENSG00000239961.2|mRNA|LILRA4|ENSG00000239961.2|ENSG00000239961.2|0|2171	-3.07822	4.12583	79.4353	7.03778e-17	4.80714e-15
ENSG00000120159.11|mRNA|CAAP1|ENSG00000120159.11|ENSG00000120159.11|0|3014	1.5521	6.34135	79.4043	7.12376e-17	4.84926e-15
ENSG00000239839.6|mRNA|DEFA3|ENSG00000239839.6|ENSG00000239839.6|0|498	-3.00902	5.25077	79.381	7.18934e-17	4.87725e-15
ENSG00000143575.14|mRNA|HAX1|ENSG00000143575.14|ENSG00000143575.14|0|2155	-1.71766	4.84742	79.3337	7.32421e-17	4.95191e-15
ENSG00000185201.16|mRNA|IFITM2|ENSG00000185201.16|ENSG00000185201.16|0|1543	-1.54749	6.9473	79.2057	7.70184e-17	5.18964e-15
ENSG00000140416.19|mRNA|TPM1|ENSG00000140416.19|ENSG00000140416.19|0|12492	1.91556	9.97722	79.1342	7.92146e-17	5.31965e-15
ENSG00000170515.13|mRNA|PA2G4|ENSG00000170515.13|ENSG00000170515.13|0|3795	-1.45437	6.21056	79.1163	7.97742e-17	5.33925e-15
ENSG00000237854.3|pseudogene|LINC00674|ENSG00000237854.3|ENSG00000237854.3|0|734	1.54255	6.56027	78.9541	8.50284e-17	5.67188e-15
ENSG00000198563.13|mRNA|DDX39B|ENSG00000198563.13|ENSG00000198563.13|0|7007	-1.66444	5.4055	78.8036	9.02144e-17	5.99776e-15
ENSG00000141101.12|mRNA|NOB1|ENSG00000141101.12|ENSG00000141101.12|0|2119	-1.72151	4.57416	78.7892	9.0727e-17	6.01179e-15
ENSG00000137942.16|mRNA|FNBP1L|ENSG00000137942.16|ENSG00000137942.16|0|5798	1.43326	7.22359	78.7203	9.32203e-17	6.15656e-15
ENSG00000090013.9|mRNA|BLVRB|ENSG00000090013.9|ENSG00000090013.9|0|1665	-2.08371	4.87957	78.5632	9.91652e-17	6.52756e-15
ENSG00000138594.13|mRNA|TMOD3|ENSG00000138594.13|ENSG00000138594.13|0|10632	1.35858	9.11043	78.497	1.01784e-16	6.67787e-15
ENSG00000111371.15|mRNA|SLC38A1|ENSG00000111371.15|ENSG00000111371.15|0|10015	-1.5161	5.25349	78.3394	1.08305e-16	7.06703e-15
ENSG00000215039.6|lncRNA|CD27-AS1|ENSG00000215039.6|ENSG00000215039.6|0|3411	1.90308	5.94183	78.3336	1.0855e-16	7.06703e-15
ENSG00000117676.13|mRNA|RPS6KA1|ENSG00000117676.13|ENSG00000117676.13|0|5884	-1.6104	5.75193	78.3283	1.08778e-16	7.06703e-15
ENSG00000167460.14|mRNA|TPM4|ENSG00000167460.14|ENSG00000167460.14|0|7414	1.35739	11.7989	78.1852	1.1509e-16	7.4528e-15
hsa_circ_0085616|circRNA|hsa_circ_0085616|hsa_circ_0085616|hsa_circ_0085616|0|458	-2.97484	1.43709	78.1186	1.1815e-16	7.62619e-15
ENSG00000160014.16|mRNA|CALM3|ENSG00000160014.16|ENSG00000160014.16|0|3667	1.48139	11.2444	78.1007	1.18987e-16	7.65548e-15
ENSG00000108061.11|mRNA|SHOC2|ENSG00000108061.11|ENSG00000108061.11|0|4429	1.4248	8.1967	78.0714	1.20373e-16	7.71972e-15
ENSG00000117448.13|mRNA|AKR1A1|ENSG00000117448.13|ENSG00000117448.13|0|3121	-1.77145	4.3883	77.9576	1.25898e-16	8.0482e-15
ENSG00000171928.13|mRNA|TVP23B|ENSG00000171928.13|ENSG00000171928.13|0|5862	1.72543	7.14708	77.885	1.29553e-16	8.25536e-15
ENSG00000162444.11|mRNA|RBP7|ENSG00000162444.11|ENSG00000162444.11|0|861	-1.86489	4.91964	77.8613	1.3077e-16	8.30636e-15
hsa_circ_0000826|circRNA|hsa_circ_0000826|hsa_circ_0000826|hsa_circ_0000826|0|600	1.65989	6.64141	77.5114	1.50139e-16	9.50642e-15
ENSG00000125835.18|mRNA|SNRPB|ENSG00000125835.18|ENSG00000125835.18|0|1278	-1.23655	5.88801	77.491	1.51356e-16	9.55313e-15
ENSG00000122406.12|mRNA|RPL5|ENSG00000122406.12|ENSG00000122406.12|0|2890	-1.52356	10.2797	77.309	1.62638e-16	1.02178e-14
ENSG00000163219.11|mRNA|ARHGAP25|ENSG00000163219.11|ENSG00000163219.11|0|5452	-1.39093	6.17475	77.3048	1.62912e-16	1.02178e-14
ENSG00000140740.10|mRNA|UQCRC2|ENSG00000140740.10|ENSG00000140740.10|0|5217	-1.04237	5.85594	77.2321	1.67662e-16	1.04756e-14
ENSG00000122483.17|mRNA|CCDC18|ENSG00000122483.17|ENSG00000122483.17|0|5633	1.3881	8.3162	77.2259	1.68072e-16	1.04756e-14
ENSG00000254870.5|mRNA|ATP6V1G2-DDX39B|ENSG00000254870.5|ENSG00000254870.5|0|2372	-1.63098	5.41635	77.1687	1.71916e-16	1.06818e-14
ENSG00000100243.20|mRNA|CYB5R3|ENSG00000100243.20|ENSG00000100243.20|0|5973	1.72084	8.96379	77.145	1.73536e-16	1.07403e-14
ENSG00000069399.14|mRNA|BCL3|ENSG00000069399.14|ENSG00000069399.14|0|3242	-2.07869	4.31448	77.1392	1.73935e-16	1.07403e-14
ENSG00000113851.14|mRNA|CRBN|ENSG00000113851.14|ENSG00000113851.14|0|8068	1.17175	8.08144	77.0047	1.83439e-16	1.12923e-14
ENSG00000159128.14|mRNA|IFNGR2|ENSG00000159128.14|ENSG00000159128.14|0|2960	-1.26425	5.94623	76.9022	1.91031e-16	1.17234e-14
ENSG00000128284.19|mRNA|APOL3|ENSG00000128284.19|ENSG00000128284.19|0|5901	-1.72671	4.81402	76.707	2.06369e-16	1.26259e-14
ENSG00000185989.10|mRNA|RASA3|ENSG00000185989.10|ENSG00000185989.10|0|4763	1.48158	9.20334	76.6551	2.10659e-16	1.28489e-14
ENSG00000204406.12|mRNA|MBD5|ENSG00000204406.12|ENSG00000204406.12|0|24256	1.41289	6.70027	76.5994	2.15354e-16	1.30952e-14
ENSG00000113319.12|mRNA|RASGRF2|ENSG00000113319.12|ENSG00000113319.12|0|10717	1.25635	6.1198	76.4405	2.2935e-16	1.38688e-14
ENSG00000084623.11|mRNA|EIF3I|ENSG00000084623.11|ENSG00000084623.11|0|1725	-1.61721	5.45433	76.4392	2.29467e-16	1.38688e-14
ENSG00000143621.16|mRNA|ILF2|ENSG00000143621.16|ENSG00000143621.16|0|2281	-1.49321	5.47465	76.383	2.34635e-16	1.41384e-14
ENSG00000159388.5|mRNA|BTG2|ENSG00000159388.5|ENSG00000159388.5|0|2757	-1.83061	4.17209	76.3185	2.40705e-16	1.44604e-14
ENSG00000160593.18|mRNA|JAML|ENSG00000160593.18|ENSG00000160593.18|0|8587	-1.71805	6.01351	76.1712	2.55188e-16	1.52844e-14
ENSG00000128340.14|mRNA|RAC2|ENSG00000128340.14|ENSG00000128340.14|0|2532	-1.37826	7.30196	76.1545	2.56882e-16	1.53399e-14
ENSG00000100300.17|mRNA|TSPO|ENSG00000100300.17|ENSG00000100300.17|0|1455	-1.85088	4.074	76.1108	2.6137e-16	1.55613e-14
ENSG00000145819.15|mRNA|ARHGAP26|ENSG00000145819.15|ENSG00000145819.15|0|13347	-1.223	6.05181	76.0824	2.64336e-16	1.56699e-14
ENSG00000255054.3|mRNA|AL020996.2|ENSG00000255054.3|ENSG00000255054.3|0|792	1.60479	6.48189	76.0783	2.64766e-16	1.56699e-14
ENSG00000130775.15|mRNA|THEMIS2|ENSG00000130775.15|ENSG00000130775.15|0|4621	-1.58541	5.60831	75.9328	2.80496e-16	1.65517e-14
ENSG00000122786.19|mRNA|CALD1|ENSG00000122786.19|ENSG00000122786.19|0|9843	1.55173	9.48293	75.8108	2.94421e-16	1.7312e-14
ENSG00000178882.14|mRNA|RFLNA|ENSG00000178882.14|ENSG00000178882.14|0|3173	1.47667	5.92675	75.8048	2.95116e-16	1.7312e-14
ENSG00000167658.15|mRNA|EEF2|ENSG00000167658.15|ENSG00000167658.15|0|4027	-1.48009	10.0135	75.7506	3.01533e-16	1.76366e-14
ENSG00000128609.14|mRNA|NDUFA5|ENSG00000128609.14|ENSG00000128609.14|0|9851	1.55755	8.39178	75.6563	3.13048e-16	1.82566e-14
ENSG00000101425.12|mRNA|BPI|ENSG00000101425.12|ENSG00000101425.12|0|5626	-3.43243	4.05946	75.6054	3.19441e-16	1.85751e-14
ENSG00000206177.6|mRNA|HBM|ENSG00000206177.6|ENSG00000206177.6|0|916	-2.61793	4.69333	75.5718	3.23735e-16	1.877e-14
ENSG00000241837.6|mRNA|ATP5O|ENSG00000241837.6|ENSG00000241837.6|0|3336	-1.32425	6.29852	75.3082	3.5948e-16	2.07821e-14
ENSG00000106400.11|mRNA|ZNHIT1|ENSG00000106400.11|ENSG00000106400.11|0|5510	-1.67007	4.36842	75.2502	3.67868e-16	2.12056e-14
ENSG00000168118.11|mRNA|RAB4A|ENSG00000168118.11|ENSG00000168118.11|0|3310	1.62695	8.44016	75.243	3.68932e-16	2.12056e-14
ENSG00000214212.8|mRNA|C19orf38|ENSG00000214212.8|ENSG00000214212.8|0|1565	-1.93014	4.16251	75.1183	3.87683e-16	2.22194e-14
ENSG00000105568.17|mRNA|PPP2R1A|ENSG00000105568.17|ENSG00000105568.17|0|7437	-1.33069	5.54457	75.0621	3.96456e-16	2.26571e-14
ENSG00000065150.18|mRNA|IPO5|ENSG00000065150.18|ENSG00000065150.18|0|9671	-1.29555	6.06549	74.9727	4.10817e-16	2.34107e-14
ENSG00000102030.15|mRNA|NAA10|ENSG00000102030.15|ENSG00000102030.15|0|4742	-1.22883	4.82205	74.9383	4.16477e-16	2.36656e-14
ENSG00000090621.13|mRNA|PABPC4|ENSG00000090621.13|ENSG00000090621.13|0|6782	-1.49546	6.34984	74.9089	4.21375e-16	2.38759e-14
ENSG00000114209.14|mRNA|PDCD10|ENSG00000114209.14|ENSG00000114209.14|0|3275	1.39751	8.9233	74.81	4.3831e-16	2.47651e-14
ENSG00000005020.12|mRNA|SKAP2|ENSG00000005020.12|ENSG00000005020.12|0|5520	1.69243	9.90988	74.7978	4.40432e-16	2.48147e-14
ENSG00000163687.13|mRNA|DNASE1L3|ENSG00000163687.13|ENSG00000163687.13|0|3148	-2.75935	4.40069	74.7138	4.55424e-16	2.55871e-14
ENSG00000147400.8|mRNA|CETN2|ENSG00000147400.8|ENSG00000147400.8|0|1928	1.57093	7.11143	74.685	4.6067e-16	2.58092e-14
ENSG00000196411.9|mRNA|EPHB4|ENSG00000196411.9|ENSG00000196411.9|0|6435	-2.30049	3.63167	74.6743	4.62643e-16	2.58471e-14
ENSG00000280227.1|lncRNA|AC079416.3|ENSG00000280227.1|ENSG00000280227.1|0|549	1.95066	7.05901	74.5995	4.76634e-16	2.65544e-14
ENSG00000145703.15|mRNA|IQGAP2|ENSG00000145703.15|ENSG00000145703.15|0|7904	1.429	9.85993	74.5411	4.87855e-16	2.71038e-14
ENSG00000154229.11|mRNA|PRKCA|ENSG00000154229.11|ENSG00000154229.11|0|11152	1.63386	6.9676	74.5272	4.90561e-16	2.71785e-14
ENSG00000162894.11|mRNA|FCMR|ENSG00000162894.11|ENSG00000162894.11|0|2348	-1.74664	4.62867	74.4611	5.03662e-16	2.78044e-14
ENSG00000034510.5|mRNA|TMSB10|ENSG00000034510.5|ENSG00000034510.5|0|496	-1.49984	8.79052	74.4562	5.04647e-16	2.78044e-14
ENSG00000134297.6|pseudogene|PLEKHA8P1|ENSG00000134297.6|ENSG00000134297.6|0|2320	1.96808	6.67281	74.4417	5.0757e-16	2.78884e-14
ENSG00000102409.9|mRNA|BEX4|ENSG00000102409.9|ENSG00000102409.9|0|1328	1.33412	6.59809	74.3845	5.19283e-16	2.84536e-14
ENSG00000107890.16|mRNA|ANKRD26|ENSG00000107890.16|ENSG00000107890.16|0|7941	-1.89466	4.43163	74.3701	5.22273e-16	2.8539e-14
ENSG00000196154.11|mRNA|S100A4|ENSG00000196154.11|ENSG00000196154.11|0|1025	-1.82602	5.5231	74.3259	5.31556e-16	2.89669e-14
ENSG00000079459.12|mRNA|FDFT1|ENSG00000079459.12|ENSG00000079459.12|0|5202	-1.1113	5.87314	74.2975	5.37625e-16	2.91451e-14
ENSG00000168116.13|mRNA|KIAA1586|ENSG00000168116.13|ENSG00000168116.13|0|3109	1.32636	5.63023	74.2969	5.37749e-16	2.91451e-14
ENSG00000000938.12|mRNA|FGR|ENSG00000000938.12|ENSG00000000938.12|0|3474	-1.58766	6.20729	74.2889	5.39466e-16	2.91589e-14
ENSG00000033327.12|mRNA|GAB2|ENSG00000033327.12|ENSG00000033327.12|0|6771	-1.15938	5.23781	74.2753	5.42394e-16	2.9238e-14
ENSG00000184602.5|mRNA|SNN|ENSG00000184602.5|ENSG00000184602.5|0|3312	1.77354	7.27935	74.2274	5.52861e-16	2.97219e-14
ENSG00000071994.10|mRNA|PDCD2|ENSG00000071994.10|ENSG00000071994.10|0|6476	-1.68921	4.74034	74.1458	5.71151e-16	3.06226e-14
ENSG00000143486.15|mRNA|EIF2D|ENSG00000143486.15|ENSG00000143486.15|0|8064	-1.57221	4.45019	74.1287	5.7507e-16	3.07501e-14
ENSG00000101336.13|mRNA|HCK|ENSG00000101336.13|ENSG00000101336.13|0|3092	-1.49354	6.21552	73.9867	6.086e-16	3.2456e-14
ENSG00000206047.2|mRNA|DEFA1|ENSG00000206047.2|ENSG00000206047.2|0|486	-3.55379	2.72323	73.8767	6.35925e-16	3.37957e-14
ENSG00000131100.12|mRNA|ATP6V1E1|ENSG00000131100.12|ENSG00000131100.12|0|3212	1.15677	8.00554	73.872	6.37112e-16	3.37957e-14
ENSG00000139211.6|mRNA|AMIGO2|ENSG00000139211.6|ENSG00000139211.6|0|3956	1.64086	4.43086	73.834	6.4686e-16	3.42218e-14
ENSG00000186470.13|mRNA|BTN3A2|ENSG00000186470.13|ENSG00000186470.13|0|7042	1.20272	6.44751	73.7624	6.65625e-16	3.51214e-14
ENSG00000115523.16|mRNA|GNLY|ENSG00000115523.16|ENSG00000115523.16|0|3051	-1.66067	5.55777	73.749	6.69181e-16	3.51639e-14
ENSG00000158985.13|mRNA|CDC42SE2|ENSG00000158985.13|ENSG00000158985.13|0|6024	1.3818	9.52891	73.7461	6.69957e-16	3.51639e-14
ENSG00000247774.6|lncRNA|PCED1B-AS1|ENSG00000247774.6|ENSG00000247774.6|0|3092	-1.61603	5.01702	73.7211	6.76705e-16	3.54249e-14
ENSG00000221983.7|mRNA|UBA52|ENSG00000221983.7|ENSG00000221983.7|0|4306	-1.01872	8.9359	73.6398	6.99029e-16	3.64977e-14
ENSG00000185885.15|mRNA|IFITM1|ENSG00000185885.15|ENSG00000185885.15|0|1080	-1.72579	5.06024	73.6216	7.04129e-16	3.6668e-14
ENSG00000011454.16|mRNA|RABGAP1|ENSG00000011454.16|ENSG00000011454.16|0|9162	1.27634	8.09857	73.6065	7.08415e-16	3.67951e-14
ENSG00000197694.15|mRNA|SPTAN1|ENSG00000197694.15|ENSG00000197694.15|0|16236	-1.40698	7.94579	73.592	7.12518e-16	3.69122e-14
ENSG00000204136.10|pseudogene|GGTA1P|ENSG00000204136.10|ENSG00000204136.10|0|4501	1.70881	9.25413	73.5746	7.17481e-16	3.69929e-14
[truncated: 19,559 more rows]

## Sheet: kraken2 colorectal vs. HD
genus id	logFC	logCPM	F	PValue	FDR
[truncated: 787 more rows]

[truncated: 13 more sheets: bowtie2 colorectal vs. HD, human stomach vs. HD, kraken2 stomach vs. HD, bowtie2 stomach vs. HD, human liver vs. HD, kraken2 liver vs. HD, bowtie2 liver vs. HD, human lung cancer vs. HD, kraken2 lung vs. HD, bowtie2 lung vs. HD, human esophagus cancer vs. HD, kraken2 esophagus vs. HD, bowtie2 esophagus vs. HD]
