# Supplementary material for: Cancer type classification using plasma cell-free RNAs derived from human and microbes
Source: eLife. 2022 Jul 11;11:e75181. doi: 10.7554/eLife.75181 (PMC9273212; doi:10.7554/eLife.75181)
Supplement: Supplementary file 6. [file elife-75181-supp6.xlsx]

## Sheet: human colorectum OvR
gene id	logFC	logCPM	F	PValue	FDR
hsa_circ_0032261|circRNA|hsa_circ_0032261|hsa_circ_0032261|hsa_circ_0032261|0|600	2.63099	1.56013	70.5779	2.38294e-15	2.37639e-11
hsa_circ_0055020|circRNA|hsa_circ_0055020|hsa_circ_0055020|hsa_circ_0055020|0|600	2.57881	2.8057	80.724	4.23118e-17	8.43908e-13
hsa_circ_0037006|circRNA|hsa_circ_0037006|hsa_circ_0037006|hsa_circ_0037006|0|600	2.39454	1.63254	65.69	1.73807e-14	5.74324e-11
hsa_circ_0072689|circRNA|hsa_circ_0072689|hsa_circ_0072689|hsa_circ_0072689|0|600	2.2072	1.91142	53.4537	2.88562e-12	1.48492e-09
hsa_circ_0005852|circRNA|hsa_circ_0005852|hsa_circ_0005852|hsa_circ_0005852|0|600	2.18533	1.8159	55.1126	1.42564e-12	1.01551e-09
hsa_circ_0086425|circRNA|hsa_circ_0086425|hsa_circ_0086425|hsa_circ_0086425|0|600	2.14104	3.40344	68.2057	6.22712e-15	4.14e-11
hsa_circ_0023176|circRNA|hsa_circ_0023176|hsa_circ_0023176|hsa_circ_0023176|0|600	2.08812	1.20843	37.1243	3.72268e-09	3.48586e-07
hsa_circ_0020251|circRNA|hsa_circ_0020251|hsa_circ_0020251|hsa_circ_0020251|0|600	2.04009	1.82847	50.446	1.0467e-11	3.66255e-09
hsa_circ_0003808|circRNA|hsa_circ_0003808|hsa_circ_0003808|hsa_circ_0003808|0|600	2.00348	2.57118	58.7723	3.05035e-13	3.80245e-10
hsa_circ_0054893|circRNA|hsa_circ_0054893|hsa_circ_0054893|hsa_circ_0054893|0|600	1.96386	2.00739	53.7435	2.55041e-12	1.48481e-09
hsa_circ_0082056|circRNA|hsa_circ_0082056|hsa_circ_0082056|hsa_circ_0082056|0|600	1.95196	1.10054	37.3356	3.38378e-09	3.24468e-07
ENSG00000264707.1|lncRNA|L3MBTL4-AS1|ENSG00000264707.1|ENSG00000264707.1|0|2044	1.86689	2.21689	46.4776	5.84891e-11	1.32564e-08
hsa_circ_0065160|circRNA|hsa_circ_0065160|hsa_circ_0065160|hsa_circ_0065160|0|600	1.86388	0.986092	37.4216	3.25488e-09	3.15139e-07
hsa_circ_0075655|circRNA|hsa_circ_0075655|hsa_circ_0075655|hsa_circ_0075655|0|600	1.81473	3.04995	45.9188	7.4667e-11	1.6547e-08
hsa_circ_0046842|circRNA|hsa_circ_0046842|hsa_circ_0046842|hsa_circ_0046842|0|600	1.69084	4.32931	52.459	4.41239e-12	1.83344e-09
hsa_circ_0036350|circRNA|hsa_circ_0036350|hsa_circ_0036350|hsa_circ_0036350|0|600	1.66314	1.412	24.2057	1.4918e-06	3.40046e-05
hsa_circ_0087248|circRNA|hsa_circ_0087248|hsa_circ_0087248|hsa_circ_0087248|0|600	1.65581	2.33767	38.0537	2.44791e-09	2.44118e-07
hsa_circ_0055024|circRNA|hsa_circ_0055024|hsa_circ_0055024|hsa_circ_0055024|0|600	1.65574	2.81506	37.849	2.68435e-09	2.65046e-07
hsa_circ_0001520|circRNA|hsa_circ_0001520|hsa_circ_0001520|hsa_circ_0001520|0|600	1.63781	1.76004	39.8022	1.11695e-09	1.31045e-07
hsa_circ_0074837|circRNA|hsa_circ_0074837|hsa_circ_0074837|hsa_circ_0074837|0|600	1.63353	2.42431	45.1395	1.05047e-10	2.07442e-08
hsa_circ_0057521|circRNA|hsa_circ_0057521|hsa_circ_0057521|hsa_circ_0057521|0|600	1.5931	2.56844	45.4427	9.19711e-11	1.8718e-08
hsa_circ_0042092|circRNA|hsa_circ_0042092|hsa_circ_0042092|hsa_circ_0042092|0|600	1.49746	1.99492	31.2884	5.36085e-08	2.74864e-06
hsa_circ_0008448|circRNA|hsa_circ_0008448|hsa_circ_0008448|hsa_circ_0008448|0|600	1.48664	1.70649	22.9088	2.77525e-06	5.4267e-05
hsa_circ_0088047|circRNA|hsa_circ_0088047|hsa_circ_0088047|hsa_circ_0088047|0|600	1.45579	3.45165	34.6819	1.1282e-08	8.55587e-07
hsa_circ_0017246|circRNA|hsa_circ_0017246|hsa_circ_0017246|hsa_circ_0017246|0|600	1.45325	3.13953	35.6381	7.30006e-09	6.01652e-07
hsa_circ_0044705|circRNA|hsa_circ_0044705|hsa_circ_0044705|hsa_circ_0044705|0|600	1.42577	1.38898	27.6167	2.96763e-07	9.78682e-06
ENSG00000225972.1|pseudogene|MTND1P23|ENSG00000225972.1|ENSG00000225972.1|0|372	1.42101	3.15411	28.6814	1.8018e-07	6.79338e-06
ENSG00000237973.1|pseudogene|MTCO1P12|ENSG00000237973.1|ENSG00000237973.1|0|1543	1.34455	2.60173	30.4926	7.75054e-08	3.64586e-06
ENSG00000248527.1|pseudogene|MTATP6P1|ENSG00000248527.1|ENSG00000248527.1|0|681	1.31408	3.63604	38.0858	2.41285e-09	2.43052e-07
hsa_circ_0008255|circRNA|hsa_circ_0008255|hsa_circ_0008255|hsa_circ_0008255|0|600	1.3069	1.89262	21.6005	5.21239e-06	8.85528e-05
hsa_circ_0035451|circRNA|hsa_circ_0035451|hsa_circ_0035451|hsa_circ_0035451|0|600	1.30633	0.953165	29.1972	1.41606e-07	5.73323e-06
hsa_circ_0030229|circRNA|hsa_circ_0030229|hsa_circ_0030229|hsa_circ_0030229|0|600	1.29905	0.778519	32.7694	2.70829e-08	1.61965e-06
hsa_circ_0073434|circRNA|hsa_circ_0073434|hsa_circ_0073434|hsa_circ_0073434|0|600	1.29033	1.66177	28.2965	2.15742e-07	7.81992e-06
hsa_circ_0071092|circRNA|hsa_circ_0071092|hsa_circ_0071092|hsa_circ_0071092|0|436	1.27594	1.57952	19.6298	1.35783e-05	0.000181514
hsa_circ_0009918|circRNA|hsa_circ_0009918|hsa_circ_0009918|hsa_circ_0009918|0|600	1.2728	1.16166	13.8417	0.000241033	0.00155378
ENSG00000240356.6|pseudogene|RPL23AP7|ENSG00000240356.6|ENSG00000240356.6|0|2128	1.26348	6.76865	13.9542	0.000227689	0.00149138
ENSG00000248334.6|pseudogene|WHAMMP2|ENSG00000248334.6|ENSG00000248334.6|0|6657	1.24645	7.45167	22.1358	4.02554e-06	7.27785e-05
ENSG00000264235.5|lncRNA|AP005329.1|ENSG00000264235.5|ENSG00000264235.5|0|1063	1.23839	3.74738	31.6356	4.5663e-08	2.40303e-06
hsa_circ_0086730|circRNA|hsa_circ_0086730|hsa_circ_0086730|hsa_circ_0086730|0|600	1.21081	4.08263	27.8276	2.68795e-07	9.14408e-06
hsa_circ_0079275|circRNA|hsa_circ_0079275|hsa_circ_0079275|hsa_circ_0079275|0|600	1.20695	3.93302	28.8586	1.6586e-07	6.40249e-06
hsa_circ_0030051|circRNA|hsa_circ_0030051|hsa_circ_0030051|hsa_circ_0030051|0|600	1.20595	4.60689	33.8905	1.61958e-08	1.10992e-06
ENSG00000278828.1|mRNA|HIST1H3H|ENSG00000278828.1|ENSG00000278828.1|0|1237	1.2	2.15736	19.6046	1.37463e-05	0.000183146
hsa_circ_0000563|circRNA|hsa_circ_0000563|hsa_circ_0000563|hsa_circ_0000563|0|600	1.19946	1.22083	19.8985	1.19094e-05	0.000165875
hsa_circ_0082584|circRNA|hsa_circ_0082584|hsa_circ_0082584|hsa_circ_0082584|0|600	1.19919	0.916092	22.4558	3.45049e-06	6.41206e-05
hsa_circ_0021604|circRNA|hsa_circ_0021604|hsa_circ_0021604|hsa_circ_0021604|0|600	1.19548	1.68824	24.465	1.3183e-06	3.10064e-05
hsa_circ_0001028|circRNA|hsa_circ_0001028|hsa_circ_0001028|hsa_circ_0001028|0|600	1.19209	2.14477	25.6403	7.54083e-07	2.04907e-05
ENSG00000071909.18|mRNA|MYO3B|ENSG00000071909.18|ENSG00000071909.18|0|8236	1.18862	3.83064	15.9985	8.15119e-05	0.000695659
ENSG00000120051.14|mRNA|CFAP58|ENSG00000120051.14|ENSG00000120051.14|0|3548	1.18458	2.82588	40.9276	6.75927e-10	8.86932e-08
hsa_circ_0004966|circRNA|hsa_circ_0004966|hsa_circ_0004966|hsa_circ_0004966|0|600	1.1755	4.56733	27.2377	3.54656e-07	1.11924e-05
hsa_circ_0028980|circRNA|hsa_circ_0028980|hsa_circ_0028980|hsa_circ_0028980|0|600	1.16969	1.14556	23.8279	1.7868e-06	3.85272e-05
hsa_circ_0031762|circRNA|hsa_circ_0031762|hsa_circ_0031762|hsa_circ_0031762|0|600	1.16197	1.43053	24.5177	1.28562e-06	3.06719e-05
hsa_circ_0045134|circRNA|hsa_circ_0045134|hsa_circ_0045134|hsa_circ_0045134|0|600	1.15577	1.8073	24.0741	1.58852e-06	3.52034e-05
hsa_circ_0000240|circRNA|hsa_circ_0000240|hsa_circ_0000240|hsa_circ_0000240|0|600	1.14791	1.22897	26.5338	4.94166e-07	1.46234e-05
hsa_circ_0023065|circRNA|hsa_circ_0023065|hsa_circ_0023065|hsa_circ_0023065|0|600	1.13905	0.891652	22.9281	2.74971e-06	5.39778e-05
hsa_circ_0054894|circRNA|hsa_circ_0054894|hsa_circ_0054894|hsa_circ_0054894|0|600	1.11311	1.68607	19.3522	1.55516e-05	0.000201022
hsa_circ_0079607|circRNA|hsa_circ_0079607|hsa_circ_0079607|hsa_circ_0079607|0|600	1.08884	1.38841	14.5467	0.000168804	0.0011973
hsa_circ_0006947|circRNA|hsa_circ_0006947|hsa_circ_0006947|hsa_circ_0006947|0|600	1.08217	1.37958	18.1652	2.78463e-05	0.000309068
hsa_circ_0066184|circRNA|hsa_circ_0066184|hsa_circ_0066184|hsa_circ_0066184|0|600	1.08121	1.04566	18.4611	2.40734e-05	0.000276368
hsa_circ_0060597|circRNA|hsa_circ_0060597|hsa_circ_0060597|hsa_circ_0060597|0|600	1.07973	1.0947	16.5744	6.1183e-05	0.000557977
hsa_circ_0007017|circRNA|hsa_circ_0007017|hsa_circ_0007017|hsa_circ_0007017|0|600	1.07473	2.08548	18.6483	2.19582e-05	0.000258534
ENSG00000145936.8|mRNA|KCNMB1|ENSG00000145936.8|ENSG00000145936.8|0|6079	1.07432	3.70563	18.9509	1.89285e-05	0.000231897
hsa_circ_0082752|circRNA|hsa_circ_0082752|hsa_circ_0082752|hsa_circ_0082752|0|600	1.06946	1.52302	19.3402	1.56431e-05	0.000201812
hsa_circ_0026227|circRNA|hsa_circ_0026227|hsa_circ_0026227|hsa_circ_0026227|0|600	1.06261	1.53299	11.5702	0.000769553	0.00368694
hsa_circ_0084159|circRNA|hsa_circ_0084159|hsa_circ_0084159|hsa_circ_0084159|0|600	1.06086	1.485	21.5206	5.41757e-06	9.11374e-05
hsa_circ_0004909|circRNA|hsa_circ_0004909|hsa_circ_0004909|hsa_circ_0004909|0|600	1.0492	1.61029	19.7621	1.27289e-05	0.000172823
hsa_circ_0062650|circRNA|hsa_circ_0062650|hsa_circ_0062650|hsa_circ_0062650|0|600	1.04709	1.24301	20.5255	8.77632e-06	0.000132009
ENSG00000236411.1|pseudogene|NDUFAF4P3|ENSG00000236411.1|ENSG00000236411.1|0|525	1.04436	4.2984	20.41	9.28344e-06	0.000138075
ENSG00000167914.11|mRNA|GSDMA|ENSG00000167914.11|ENSG00000167914.11|0|2273	1.04391	2.18443	14.7281	0.000154066	0.0011174
hsa_circ_0070201|circRNA|hsa_circ_0070201|hsa_circ_0070201|hsa_circ_0070201|0|600	1.03937	2.27095	19.4997	1.44691e-05	0.00019036
hsa_circ_0003947|circRNA|hsa_circ_0003947|hsa_circ_0003947|hsa_circ_0003947|0|594	1.03449	1.74866	16.9597	5.05267e-05	0.000485032
hsa_circ_0086422|circRNA|hsa_circ_0086422|hsa_circ_0086422|hsa_circ_0086422|0|600	1.02732	3.20675	21.8296	4.66617e-06	8.13521e-05
hsa_circ_0036377|circRNA|hsa_circ_0036377|hsa_circ_0036377|hsa_circ_0036377|0|600	1.02532	3.34948	21.889	4.53431e-06	7.96801e-05
ENSG00000184319.15|pseudogene|RPL23AP82|ENSG00000184319.15|ENSG00000184319.15|0|4250	1.0181	5.38699	12.8524	0.000398593	0.00227271
hsa_circ_0037108|circRNA|hsa_circ_0037108|hsa_circ_0037108|hsa_circ_0037108|0|600	1.0179	1.46368	21.5153	5.43156e-06	9.12657e-05
hsa_circ_0017921|circRNA|hsa_circ_0017921|hsa_circ_0017921|hsa_circ_0017921|0|600	1.0155	1.50877	18.9586	1.88576e-05	0.000231313
hsa_circ_0003533|circRNA|hsa_circ_0003533|hsa_circ_0003533|hsa_circ_0003533|0|600	1.01318	1.23482	18.089	2.89124e-05	0.000317718
hsa_circ_0077607|circRNA|hsa_circ_0077607|hsa_circ_0077607|hsa_circ_0077607|0|600	1.0114	1.38595	20.2167	1.01989e-05	0.00014848
hsa_circ_0087863|circRNA|hsa_circ_0087863|hsa_circ_0087863|hsa_circ_0087863|0|600	1.01053	1.32582	20.731	7.94264e-06	0.000122423
hsa_circ_0036169|circRNA|hsa_circ_0036169|hsa_circ_0036169|hsa_circ_0036169|0|600	1.00644	1.1668	17.8135	3.31191e-05	0.000352079
hsa_circ_0003459|circRNA|hsa_circ_0003459|hsa_circ_0003459|hsa_circ_0003459|0|600	1.00089	1.08865	18.7389	2.10032e-05	0.00024979
hsa_circ_0072687|circRNA|hsa_circ_0072687|hsa_circ_0072687|hsa_circ_0072687|0|600	0.999631	2.2287	12.878	0.000393413	0.00225351
hsa_circ_0070058|circRNA|hsa_circ_0070058|hsa_circ_0070058|hsa_circ_0070058|0|600	0.998307	0.976304	17.7374	3.43868e-05	0.000363073
hsa_circ_0056670|circRNA|hsa_circ_0056670|hsa_circ_0056670|hsa_circ_0056670|0|600	0.99825	1.77728	14.4818	0.000174425	0.00122713
hsa_circ_0042754|circRNA|hsa_circ_0042754|hsa_circ_0042754|hsa_circ_0042754|0|600	0.996446	1.02229	19.1158	1.74592e-05	0.000218596
ENSG00000164171.10|mRNA|ITGA2|ENSG00000164171.10|ENSG00000164171.10|0|7910	0.995457	5.45983	20.3937	9.35709e-06	0.000138756
hsa_circ_0008083|circRNA|hsa_circ_0008083|hsa_circ_0008083|hsa_circ_0008083|0|600	0.991517	1.26554	21.926	4.45417e-06	7.86877e-05
hsa_circ_0002787|circRNA|hsa_circ_0002787|hsa_circ_0002787|hsa_circ_0002787|0|600	0.982935	3.26635	19.685	1.32167e-05	0.000177993
hsa_circ_0054413|circRNA|hsa_circ_0054413|hsa_circ_0054413|hsa_circ_0054413|0|600	0.9808	1.30761	17.9967	3.0258e-05	0.000329779
hsa_circ_0085314|circRNA|hsa_circ_0085314|hsa_circ_0085314|hsa_circ_0085314|0|600	0.980571	3.73672	17.157	4.58201e-05	0.000451077
hsa_circ_0070565|circRNA|hsa_circ_0070565|hsa_circ_0070565|hsa_circ_0070565|0|600	0.978387	1.40056	12.5255	0.000471067	0.00257161
ENSG00000250101.1|lncRNA|AC106795.3|ENSG00000250101.1|ENSG00000250101.1|0|547	0.973474	2.37718	15.5238	0.000103339	0.000826756
ENSG00000171033.12|mRNA|PKIA|ENSG00000171033.12|ENSG00000171033.12|0|4216	0.973187	6.18639	24.8021	1.12276e-06	2.78526e-05
hsa_circ_0055061|circRNA|hsa_circ_0055061|hsa_circ_0055061|hsa_circ_0055061|0|600	0.973017	2.34654	15.3208	0.000114401	0.000895847
hsa_circ_0019297|circRNA|hsa_circ_0019297|hsa_circ_0019297|hsa_circ_0019297|0|600	0.972606	1.49456	17.261	4.35195e-05	0.000432916
hsa_circ_0009119|circRNA|hsa_circ_0009119|hsa_circ_0009119|hsa_circ_0009119|0|600	0.971786	1.32001	18.2943	2.61326e-05	0.000294972
ENSG00000225231.1|lncRNA|LINC02470|ENSG00000225231.1|ENSG00000225231.1|0|979	0.971706	2.66823	11.8077	0.000680898	0.00337912
ENSG00000267110.1|mRNA|AC010327.1|ENSG00000267110.1|ENSG00000267110.1|0|975	0.96656	2.09029	13.3325	0.000312119	0.00188653
hsa_circ_0006303|circRNA|hsa_circ_0006303|hsa_circ_0006303|hsa_circ_0006303|0|588	0.964713	0.971064	16.891	5.22789e-05	0.000499379
hsa_circ_0002796|circRNA|hsa_circ_0002796|hsa_circ_0002796|hsa_circ_0002796|0|600	0.964017	1.79667	18.7417	2.09738e-05	0.000249595
hsa_circ_0020028|circRNA|hsa_circ_0020028|hsa_circ_0020028|hsa_circ_0020028|0|600	0.956634	4.8522	21.7981	4.73763e-06	8.22384e-05
ENSG00000237419.1|lncRNA|AL954642.1|ENSG00000237419.1|ENSG00000237419.1|0|538	0.956628	3.34505	12.8583	0.000397396	0.00226783
hsa_circ_0008472|circRNA|hsa_circ_0008472|hsa_circ_0008472|hsa_circ_0008472|0|600	0.955029	1.33096	14.5771	0.000166244	0.00118546
hsa_circ_0036403|circRNA|hsa_circ_0036403|hsa_circ_0036403|hsa_circ_0036403|0|600	0.95482	1.09868	16.1272	7.64427e-05	0.000662603
ENSG00000261377.5|pseudogene|PDCD6IPP2|ENSG00000261377.5|ENSG00000261377.5|0|5244	0.954481	4.04451	26.4947	5.03392e-07	1.47942e-05
hsa_circ_0058055|circRNA|hsa_circ_0058055|hsa_circ_0058055|hsa_circ_0058055|0|600	0.954357	1.89881	20.0144	1.12551e-05	0.000158008
ENSG00000107020.9|mRNA|PLGRKT|ENSG00000107020.9|ENSG00000107020.9|0|1493	0.953696	3.13037	15.9576	8.31916e-05	0.000704055
hsa_circ_0080850|circRNA|hsa_circ_0080850|hsa_circ_0080850|hsa_circ_0080850|0|600	0.953563	1.90824	15.4569	0.000106857	0.000848099
ENSG00000188428.19|mRNA|BLOC1S5|ENSG00000188428.19|ENSG00000188428.19|0|3315	0.952366	5.53714	31.7611	4.30924e-08	2.28584e-06
hsa_circ_0015783|circRNA|hsa_circ_0015783|hsa_circ_0015783|hsa_circ_0015783|0|600	0.951942	1.11174	18.3275	2.57091e-05	0.000291436
hsa_circ_0030585|circRNA|hsa_circ_0030585|hsa_circ_0030585|hsa_circ_0030585|0|600	0.949125	1.90748	16.282	7.07682e-05	0.000625434
hsa_circ_0030533|circRNA|hsa_circ_0030533|hsa_circ_0030533|hsa_circ_0030533|0|600	0.947357	1.74443	20.2065	1.02495e-05	0.000148908
hsa_circ_0025721|circRNA|hsa_circ_0025721|hsa_circ_0025721|hsa_circ_0025721|0|600	0.945543	1.50056	15.7265	9.33718e-05	0.000767959
hsa_circ_0064691|circRNA|hsa_circ_0064691|hsa_circ_0064691|hsa_circ_0064691|0|600	0.944028	0.963664	15.7844	9.0708e-05	0.000753508
ENSG00000166035.10|mRNA|LIPC|ENSG00000166035.10|ENSG00000166035.10|0|5184	0.941896	5.46928	14.3505	0.000186364	0.0012875
hsa_circ_0080827|circRNA|hsa_circ_0080827|hsa_circ_0080827|hsa_circ_0080827|0|600	0.941577	1.03523	16.802	5.46405e-05	0.000516985
hsa_circ_0075657|circRNA|hsa_circ_0075657|hsa_circ_0075657|hsa_circ_0075657|0|600	0.94112	1.21289	13.3604	0.000307719	0.00186889
hsa_circ_0013008|circRNA|hsa_circ_0013008|hsa_circ_0013008|hsa_circ_0013008|0|600	0.93356	1.26125	15.8165	8.92666e-05	0.000744635
hsa_circ_0054994|circRNA|hsa_circ_0054994|hsa_circ_0054994|hsa_circ_0054994|0|600	0.933321	0.988302	15.751	9.22351e-05	0.000761436
ENSG00000151665.12|mRNA|PIGF|ENSG00000151665.12|ENSG00000151665.12|0|4978	0.933048	4.27457	27.3096	3.42861e-07	1.09414e-05
hsa_circ_0027586|circRNA|hsa_circ_0027586|hsa_circ_0027586|hsa_circ_0027586|0|600	0.931501	1.34215	18.4163	2.46107e-05	0.000281779
hsa_circ_0032925|circRNA|hsa_circ_0032925|hsa_circ_0032925|hsa_circ_0032925|0|600	0.930982	1.24695	17.953	3.09169e-05	0.000334947
hsa_circ_0023051|circRNA|hsa_circ_0023051|hsa_circ_0023051|hsa_circ_0023051|0|600	0.930316	0.980312	16.9543	5.06634e-05	0.000485575
ENSG00000151773.12|mRNA|CCDC122|ENSG00000151773.12|ENSG00000151773.12|0|5403	0.928173	3.73554	19.7156	1.30209e-05	0.00017595
hsa_circ_0030050|circRNA|hsa_circ_0030050|hsa_circ_0030050|hsa_circ_0030050|0|600	0.927938	3.30244	20.6273	8.35275e-06	0.000127367
hsa_circ_0047720|circRNA|hsa_circ_0047720|hsa_circ_0047720|hsa_circ_0047720|0|600	0.927325	1.06921	18.397	2.48444e-05	0.000283641
hsa_circ_0002570|circRNA|hsa_circ_0002570|hsa_circ_0002570|hsa_circ_0002570|0|600	0.926663	3.073	20.0658	1.09769e-05	0.000156484
hsa_circ_0077227|circRNA|hsa_circ_0077227|hsa_circ_0077227|hsa_circ_0077227|0|600	0.925216	1.02738	15.5346	0.000102778	0.000823185
hsa_circ_0070197|circRNA|hsa_circ_0070197|hsa_circ_0070197|hsa_circ_0070197|0|600	0.91772	1.7542	14.6917	0.000156919	0.00113312
hsa_circ_0039353|circRNA|hsa_circ_0039353|hsa_circ_0039353|hsa_circ_0039353|0|600	0.916895	3.66426	17.9512	3.09437e-05	0.000335055
hsa_circ_0042975|circRNA|hsa_circ_0042975|hsa_circ_0042975|hsa_circ_0042975|0|600	0.91648	1.18766	14.2566	0.000195414	0.00133798
hsa_circ_0030537|circRNA|hsa_circ_0030537|hsa_circ_0030537|hsa_circ_0030537|0|600	0.916231	1.31248	13.5596	0.000278099	0.00173009
hsa_circ_0042967|circRNA|hsa_circ_0042967|hsa_circ_0042967|hsa_circ_0042967|0|600	0.915071	0.900942	14.1516	0.000206058	0.00138798
hsa_circ_0006525|circRNA|hsa_circ_0006525|hsa_circ_0006525|hsa_circ_0006525|0|600	0.913184	1.03632	16.1765	7.45869e-05	0.000651329
ENSG00000273061.1|lncRNA|CDC37L1-AS1|ENSG00000273061.1|ENSG00000273061.1|0|613	0.911486	3.99417	20.6663	8.19599e-06	0.000125456
hsa_circ_0079669|circRNA|hsa_circ_0079669|hsa_circ_0079669|hsa_circ_0079669|0|600	0.907584	1.50448	10.3885	0.00142054	0.00585146
hsa_circ_0025575|circRNA|hsa_circ_0025575|hsa_circ_0025575|hsa_circ_0025575|0|600	0.907583	1.08561	15.3239	0.000114222	0.000895153
hsa_circ_0020522|circRNA|hsa_circ_0020522|hsa_circ_0020522|hsa_circ_0020522|0|600	0.906166	1.41019	12.6851	0.000434152	0.00242149
hsa_circ_0025544|circRNA|hsa_circ_0025544|hsa_circ_0025544|hsa_circ_0025544|0|600	0.905169	1.00398	16.5084	6.3224e-05	0.000573183
hsa_circ_0002565|circRNA|hsa_circ_0002565|hsa_circ_0002565|hsa_circ_0002565|0|600	0.904795	1.12216	14.2796	0.000193157	0.00132617
hsa_circ_0025938|circRNA|hsa_circ_0025938|hsa_circ_0025938|hsa_circ_0025938|0|600	0.904274	2.05378	15.0355	0.000132006	0.000993156
hsa_circ_0011338|circRNA|hsa_circ_0011338|hsa_circ_0011338|hsa_circ_0011338|0|600	0.9032	3.55287	16.7533	5.59783e-05	0.000526149
hsa_circ_0091360|circRNA|hsa_circ_0091360|hsa_circ_0091360|hsa_circ_0091360|0|600	0.90002	3.19969	19.9257	1.17523e-05	0.00016403
hsa_circ_0016392|circRNA|hsa_circ_0016392|hsa_circ_0016392|hsa_circ_0016392|0|600	0.899444	1.09753	15.0626	0.000130224	0.000981972
ENSG00000166770.10|lncRNA|ZNF667-AS1|ENSG00000166770.10|ENSG00000166770.10|0|3629	0.899032	3.2423	13.2834	0.00032	0.00192443
ENSG00000135919.12|mRNA|SERPINE2|ENSG00000135919.12|ENSG00000135919.12|0|8891	0.897825	5.36484	15.6062	9.91637e-05	0.000802361
hsa_circ_0074719|circRNA|hsa_circ_0074719|hsa_circ_0074719|hsa_circ_0074719|0|600	0.897757	1.38866	11.6871	0.000724561	0.00354114
hsa_circ_0085762|circRNA|hsa_circ_0085762|hsa_circ_0085762|hsa_circ_0085762|0|600	0.896878	2.17206	16.1008	7.74534e-05	0.000669618
hsa_circ_0001350|circRNA|hsa_circ_0001350|hsa_circ_0001350|hsa_circ_0001350|0|600	0.896007	1.42373	15.7783	9.09853e-05	0.000754554
hsa_circ_0053736|circRNA|hsa_circ_0053736|hsa_circ_0053736|hsa_circ_0053736|0|600	0.89302	1.07526	13.6814	0.000261437	0.00165464
hsa_circ_0018815|circRNA|hsa_circ_0018815|hsa_circ_0018815|hsa_circ_0018815|0|600	0.892671	1.6434	16.4271	6.58342e-05	0.000590406
hsa_circ_0073384|circRNA|hsa_circ_0073384|hsa_circ_0073384|hsa_circ_0073384|0|600	0.89169	1.85952	10.8433	0.00112115	0.00491457
hsa_circ_0017971|circRNA|hsa_circ_0017971|hsa_circ_0017971|hsa_circ_0017971|0|600	0.890626	3.01937	13.3939	0.000302528	0.00184355
hsa_circ_0071209|circRNA|hsa_circ_0071209|hsa_circ_0071209|hsa_circ_0071209|0|600	0.889226	1.58867	13.1445	0.000343445	0.00202903
hsa_circ_0075541|circRNA|hsa_circ_0075541|hsa_circ_0075541|hsa_circ_0075541|0|600	0.888848	0.941157	10.6184	0.00126017	0.0053516
hsa_circ_0047484|circRNA|hsa_circ_0047484|hsa_circ_0047484|hsa_circ_0047484|0|600	0.887584	1.11692	16.1109	7.70649e-05	0.000667127
hsa_circ_0077088|circRNA|hsa_circ_0077088|hsa_circ_0077088|hsa_circ_0077088|0|600	0.885505	1.17876	14.6896	0.000157085	0.00113312
hsa_circ_0085097|circRNA|hsa_circ_0085097|hsa_circ_0085097|hsa_circ_0085097|0|600	0.882281	0.986163	13.8943	0.000234696	0.00152869
ENSG00000151136.14|mRNA|BTBD11|ENSG00000151136.14|ENSG00000151136.14|0|7924	0.881673	4.00048	8.11088	0.00473164	0.0148494
hsa_circ_0029810|circRNA|hsa_circ_0029810|hsa_circ_0029810|hsa_circ_0029810|0|600	0.881382	3.98898	14.3664	0.000184873	0.00127885
hsa_circ_0091362|circRNA|hsa_circ_0091362|hsa_circ_0091362|hsa_circ_0091362|0|600	0.881201	2.765	15.8904	8.60312e-05	0.000722785
hsa_circ_0008106|circRNA|hsa_circ_0008106|hsa_circ_0008106|hsa_circ_0008106|0|600	0.880819	3.60508	16.522	6.27982e-05	0.0005701
ENSG00000243701.5|lncRNA|DUBR|ENSG00000243701.5|ENSG00000243701.5|0|4206	0.880791	3.40144	15.1869	0.000122343	0.000939959
hsa_circ_0073276|circRNA|hsa_circ_0073276|hsa_circ_0073276|hsa_circ_0073276|0|600	0.879478	5.98111	17.3014	4.26578e-05	0.000426472
ENSG00000239445.5|lncRNA|ST3GAL6-AS1|ENSG00000239445.5|ENSG00000239445.5|0|843	0.878865	4.18672	15.1936	0.000121935	0.000937547
hsa_circ_0084147|circRNA|hsa_circ_0084147|hsa_circ_0084147|hsa_circ_0084147|0|600	0.878297	1.12098	14.1849	0.000202619	0.0013702
hsa_circ_0039268|circRNA|hsa_circ_0039268|hsa_circ_0039268|hsa_circ_0039268|0|600	0.878255	2.44909	13.9609	0.000226916	0.00148778
hsa_circ_0001099|circRNA|hsa_circ_0001099|hsa_circ_0001099|hsa_circ_0001099|0|600	0.877761	0.973805	12.8063	0.000408083	0.0023094
hsa_circ_0002231|circRNA|hsa_circ_0002231|hsa_circ_0002231|hsa_circ_0002231|0|600	0.877674	1.43818	16.9833	4.99401e-05	0.000481419
hsa_circ_0091445|circRNA|hsa_circ_0091445|hsa_circ_0091445|hsa_circ_0091445|0|520	0.876372	0.95994	15.2738	0.00011713	0.000909715
hsa_circ_0075272|circRNA|hsa_circ_0075272|hsa_circ_0075272|hsa_circ_0075272|0|600	0.875483	4.49565	16.5979	6.04717e-05	0.000553893
hsa_circ_0002999|circRNA|hsa_circ_0002999|hsa_circ_0002999|hsa_circ_0002999|0|600	0.875318	3.21351	17.0611	4.805e-05	0.00046772
ENSG00000279198.1|lncRNA|AC008894.3|ENSG00000279198.1|ENSG00000279198.1|0|3103	0.875136	3.52603	13.5344	0.000281687	0.00174534
ENSG00000113356.11|mRNA|POLR3G|ENSG00000113356.11|ENSG00000113356.11|0|4019	0.874044	8.37404	17.2302	4.41873e-05	0.000438248
hsa_circ_0019094|circRNA|hsa_circ_0019094|hsa_circ_0019094|hsa_circ_0019094|0|600	0.872142	1.1325	16.1923	7.40003e-05	0.000647057
hsa_circ_0077970|circRNA|hsa_circ_0077970|hsa_circ_0077970|hsa_circ_0077970|0|600	0.872079	1.49744	14.7938	0.000149059	0.001091
ENSG00000251435.1|pseudogene|C1GALT1P2|ENSG00000251435.1|ENSG00000251435.1|0|1104	0.871371	2.24693	13.407	0.00030052	0.00183478
ENSG00000170935.7|mRNA|NCBP2L|ENSG00000170935.7|ENSG00000170935.7|0|2079	0.869476	2.66397	14.7678	0.000151023	0.00110214
hsa_circ_0071176|circRNA|hsa_circ_0071176|hsa_circ_0071176|hsa_circ_0071176|0|600	0.869122	2.04081	14.0303	0.000219095	0.00144601
ENSG00000260032.1|lncRNA|NORAD|ENSG00000260032.1|ENSG00000260032.1|0|5339	0.868127	3.59512	18.7551	2.08365e-05	0.00024811
hsa_circ_0007619|circRNA|hsa_circ_0007619|hsa_circ_0007619|hsa_circ_0007619|0|600	0.867201	4.45253	19.9228	1.17689e-05	0.000164147
hsa_circ_0070814|circRNA|hsa_circ_0070814|hsa_circ_0070814|hsa_circ_0070814|0|600	0.866409	1.08979	12.8662	0.000395793	0.00226071
ENSG00000223969.5|lncRNA|AC002456.1|ENSG00000223969.5|ENSG00000223969.5|0|616	0.866087	3.27731	14.1324	0.000208063	0.00139818
hsa_circ_0001163|circRNA|hsa_circ_0001163|hsa_circ_0001163|hsa_circ_0001163|0|600	0.864236	3.65421	15.3315	0.000113788	0.000892451
hsa_circ_0003963|circRNA|hsa_circ_0003963|hsa_circ_0003963|hsa_circ_0003963|0|600	0.863954	1.77517	15.847	8.79148e-05	0.00073613
ENSG00000163430.11|mRNA|FSTL1|ENSG00000163430.11|ENSG00000163430.11|0|8727	0.863637	7.68394	14.2233	0.000198725	0.00135389
hsa_circ_0077091|circRNA|hsa_circ_0077091|hsa_circ_0077091|hsa_circ_0077091|0|600	0.863478	0.973685	13.0413	0.000361991	0.00211342
hsa_circ_0008144|circRNA|hsa_circ_0008144|hsa_circ_0008144|hsa_circ_0008144|0|600	0.863288	1.50727	14.5905	0.000165124	0.00118043
hsa_circ_0029624|circRNA|hsa_circ_0029624|hsa_circ_0029624|hsa_circ_0029624|0|600	0.863138	1.2278	14.4557	0.00017673	0.00123874
hsa_circ_0053441|circRNA|hsa_circ_0053441|hsa_circ_0053441|hsa_circ_0053441|0|600	0.862995	1.05027	13.3594	0.000307866	0.00186922
hsa_circ_0010475|circRNA|hsa_circ_0010475|hsa_circ_0010475|hsa_circ_0010475|0|600	0.860833	0.948964	11.257	0.000904712	0.00417875
hsa_circ_0029639|circRNA|hsa_circ_0029639|hsa_circ_0029639|hsa_circ_0029639|0|600	0.860737	1.3092	12.4489	0.000489919	0.00263903
hsa_circ_0073440|circRNA|hsa_circ_0073440|hsa_circ_0073440|hsa_circ_0073440|0|600	0.859291	1.56146	14.1218	0.000209186	0.00140101
hsa_circ_0058054|circRNA|hsa_circ_0058054|hsa_circ_0058054|hsa_circ_0058054|0|600	0.857444	3.50391	12.5784	0.000458484	0.00252186
hsa_circ_0031584|circRNA|hsa_circ_0031584|hsa_circ_0031584|hsa_circ_0031584|0|600	0.855456	1.21143	12.8729	0.000394436	0.0022574
hsa_circ_0055023|circRNA|hsa_circ_0055023|hsa_circ_0055023|hsa_circ_0055023|0|600	0.8549	3.58166	15.4685	0.000106238	0.000843852
hsa_circ_0007088|circRNA|hsa_circ_0007088|hsa_circ_0007088|hsa_circ_0007088|0|600	0.854388	2.16234	14.5837	0.000165693	0.00118239
ENSG00000255364.1|lncRNA|SMILR|ENSG00000255364.1|ENSG00000255364.1|0|553	0.853611	4.75893	14.9925	0.00013489	0.00100839
hsa_circ_0042767|circRNA|hsa_circ_0042767|hsa_circ_0042767|hsa_circ_0042767|0|600	0.853571	3.01345	11.6202	0.000749975	0.00362361
ENSG00000272030.1|lncRNA|AL162258.2|ENSG00000272030.1|ENSG00000272030.1|0|1054	0.853117	1.76386	13.5624	0.000277702	0.00172892
hsa_circ_0080856|circRNA|hsa_circ_0080856|hsa_circ_0080856|hsa_circ_0080856|0|600	0.852762	2.67664	12.9389	0.000381388	0.0022004
hsa_circ_0015467|circRNA|hsa_circ_0015467|hsa_circ_0015467|hsa_circ_0015467|0|600	0.852233	1.35535	13.4551	0.000293252	0.0017987
hsa_circ_0086421|circRNA|hsa_circ_0086421|hsa_circ_0086421|hsa_circ_0086421|0|600	0.850422	1.69506	12.4195	0.000497329	0.00267032
hsa_circ_0071539|circRNA|hsa_circ_0071539|hsa_circ_0071539|hsa_circ_0071539|0|600	0.849095	1.64885	12.1093	0.000583085	0.00300274
hsa_circ_0000826|circRNA|hsa_circ_0000826|hsa_circ_0000826|hsa_circ_0000826|0|600	0.848555	6.63846	26.1889	5.81623e-07	1.64546e-05
hsa_circ_0009131|circRNA|hsa_circ_0009131|hsa_circ_0009131|hsa_circ_0009131|0|600	0.845093	0.999142	14.2307	0.000197982	0.00135138
hsa_circ_0075273|circRNA|hsa_circ_0075273|hsa_circ_0075273|hsa_circ_0075273|0|600	0.845003	5.51903	16.0794	7.82865e-05	0.000675649
hsa_circ_0088038|circRNA|hsa_circ_0088038|hsa_circ_0088038|hsa_circ_0088038|0|600	0.842753	1.88295	14.3385	0.000187497	0.00129331
ENSG00000265818.1|mRNA|EEF1E1-BLOC1S5|ENSG00000265818.1|ENSG00000265818.1|0|768	0.842563	5.75278	29.8539	1.04283e-07	4.57125e-06
hsa_circ_0037896|circRNA|hsa_circ_0037896|hsa_circ_0037896|hsa_circ_0037896|0|350	0.842492	1.35996	13.2945	0.000318205	0.00191451
hsa_circ_0046685|circRNA|hsa_circ_0046685|hsa_circ_0046685|hsa_circ_0046685|0|224	0.841918	1.14487	12.0452	0.000602619	0.00307817
hsa_circ_0035292|circRNA|hsa_circ_0035292|hsa_circ_0035292|hsa_circ_0035292|0|600	0.840376	3.80051	18.7715	2.06696e-05	0.00024666
hsa_circ_0056130|circRNA|hsa_circ_0056130|hsa_circ_0056130|hsa_circ_0056130|0|600	0.839684	1.28937	13.1869	0.000336119	0.00200116
hsa_circ_0083004|circRNA|hsa_circ_0083004|hsa_circ_0083004|hsa_circ_0083004|0|600	0.839027	2.05076	14.3082	0.00019039	0.00130898
hsa_circ_0020252|circRNA|hsa_circ_0020252|hsa_circ_0020252|hsa_circ_0020252|0|600	0.838988	1.48102	13.4243	0.000297881	0.00182164
ENSG00000145882.10|mRNA|PCYOX1L|ENSG00000145882.10|ENSG00000145882.10|0|6069	0.838832	3.26287	13.5622	0.000277738	0.00172892
hsa_circ_0091361|circRNA|hsa_circ_0091361|hsa_circ_0091361|hsa_circ_0091361|0|600	0.838527	1.57725	14.5524	0.000168321	0.00119545
hsa_circ_0052518|circRNA|hsa_circ_0052518|hsa_circ_0052518|hsa_circ_0052518|0|600	0.837731	1.1699	13.8859	0.000235702	0.00153229
hsa_circ_0079416|circRNA|hsa_circ_0079416|hsa_circ_0079416|hsa_circ_0079416|0|600	0.83716	1.09116	12.4701	0.000484609	0.00261655
hsa_circ_0001814|circRNA|hsa_circ_0001814|hsa_circ_0001814|hsa_circ_0001814|0|600	0.836914	0.92425	13.3262	0.000313108	0.00188955
hsa_circ_0003316|circRNA|hsa_circ_0003316|hsa_circ_0003316|hsa_circ_0003316|0|600	0.836006	1.80966	14.6371	0.000161292	0.00115927
ENSG00000170681.6|mRNA|CAVIN4|ENSG00000170681.6|ENSG00000170681.6|0|2615	0.835433	2.00969	13.8199	0.000243713	0.00156903
hsa_circ_0036398|circRNA|hsa_circ_0036398|hsa_circ_0036398|hsa_circ_0036398|0|600	0.834562	1.15266	12.806	0.000408154	0.0023094
hsa_circ_0037792|circRNA|hsa_circ_0037792|hsa_circ_0037792|hsa_circ_0037792|0|600	0.831901	0.915664	10.9387	0.00106697	0.00474335
ENSG00000215277.8|mRNA|RNF212B|ENSG00000215277.8|ENSG00000215277.8|0|2059	0.830497	2.90913	10.8993	0.00108897	0.00481266
hsa_circ_0003234|circRNA|hsa_circ_0003234|hsa_circ_0003234|hsa_circ_0003234|0|600	0.829373	1.88823	15.1219	0.000126399	0.000962224
hsa_circ_0056731|circRNA|hsa_circ_0056731|hsa_circ_0056731|hsa_circ_0056731|0|600	0.828652	1.51317	13.4644	0.000291875	0.00179342
ENSG00000143603.18|mRNA|KCNN3|ENSG00000143603.18|ENSG00000143603.18|0|13598	0.826516	3.47374	12.7146	0.00042765	0.00239592
hsa_circ_0070261|circRNA|hsa_circ_0070261|hsa_circ_0070261|hsa_circ_0070261|0|600	0.826314	1.24803	12.8069	0.000407965	0.0023094
hsa_circ_0001110|circRNA|hsa_circ_0001110|hsa_circ_0001110|hsa_circ_0001110|0|600	0.826105	1.40825	14.8467	0.000145145	0.00107021
hsa_circ_0089874|circRNA|hsa_circ_0089874|hsa_circ_0089874|hsa_circ_0089874|0|600	0.825644	1.3583	10.2646	0.00151547	0.00615728
ENSG00000163735.6|mRNA|CXCL5|ENSG00000163735.6|ENSG00000163735.6|0|2538	0.825577	9.60944	13.5825	0.000274883	0.0017192
hsa_circ_0062653|circRNA|hsa_circ_0062653|hsa_circ_0062653|hsa_circ_0062653|0|600	0.824691	1.79292	13.306	0.00031635	0.00190622
hsa_circ_0002179|circRNA|hsa_circ_0002179|hsa_circ_0002179|hsa_circ_0002179|0|600	0.82464	2.91558	14.549	0.00016861	0.00119634
hsa_circ_0070611|circRNA|hsa_circ_0070611|hsa_circ_0070611|hsa_circ_0070611|0|600	0.824102	1.12677	11.519	0.00079016	0.00376667
hsa_circ_0030507|circRNA|hsa_circ_0030507|hsa_circ_0030507|hsa_circ_0030507|0|600	0.823943	1.20625	12.7079	0.000429118	0.00240279
hsa_circ_0007652|circRNA|hsa_circ_0007652|hsa_circ_0007652|hsa_circ_0007652|0|600	0.823482	1.08759	13.5523	0.000279129	0.00173386
ENSG00000092969.11|mRNA|TGFB2|ENSG00000092969.11|ENSG00000092969.11|0|5151	0.823413	5.47977	14.4323	0.000178829	0.00124849
ENSG00000106484.14|mRNA|MEST|ENSG00000106484.14|ENSG00000106484.14|0|4631	0.823347	5.73356	14.4932	0.000173426	0.00122139
hsa_circ_0084683|circRNA|hsa_circ_0084683|hsa_circ_0084683|hsa_circ_0084683|0|600	0.822466	1.02622	12.321	0.000523085	0.00276883
hsa_circ_0008925|circRNA|hsa_circ_0008925|hsa_circ_0008925|hsa_circ_0008925|0|600	0.82239	1.05107	12.6402	0.000444234	0.00246099
hsa_circ_0072892|circRNA|hsa_circ_0072892|hsa_circ_0072892|hsa_circ_0072892|0|600	0.821678	1.2273	11.393	0.000843313	0.00395519
ENSG00000151789.10|mRNA|ZNF385D|ENSG00000151789.10|ENSG00000151789.10|0|13621	0.821639	6.79834	12.4364	0.00049306	0.00265212
ENSG00000259577.1|lncRNA|CERNA1|ENSG00000259577.1|ENSG00000259577.1|0|2096	0.821178	2.46489	11.7718	0.000693629	0.00342267
ENSG00000230417.11|lncRNA|LINC00595|ENSG00000230417.11|ENSG00000230417.11|0|9354	0.821084	2.61894	11.6337	0.000744787	0.00361011
ENSG00000197415.11|mRNA|VEPH1|ENSG00000197415.11|ENSG00000197415.11|0|6554	0.820676	8.02477	12.119	0.00058021	0.0029918
hsa_circ_0045537|circRNA|hsa_circ_0045537|hsa_circ_0045537|hsa_circ_0045537|0|600	0.818657	0.998164	10.4656	0.00136459	0.00567677
hsa_circ_0018195|circRNA|hsa_circ_0018195|hsa_circ_0018195|hsa_circ_0018195|0|600	0.818609	0.898858	11.691	0.000723078	0.00353554
ENSG00000166446.14|mRNA|CDYL2|ENSG00000166446.14|ENSG00000166446.14|0|8557	0.81759	4.35568	21.8722	4.57135e-06	8.01153e-05
hsa_circ_0010480|circRNA|hsa_circ_0010480|hsa_circ_0010480|hsa_circ_0010480|0|600	0.816627	1.17894	13.5637	0.000277518	0.00172873
hsa_circ_0047554|circRNA|hsa_circ_0047554|hsa_circ_0047554|hsa_circ_0047554|0|450	0.816572	3.65966	13.2631	0.000323323	0.00194003
hsa_circ_0023928|circRNA|hsa_circ_0023928|hsa_circ_0023928|hsa_circ_0023928|0|600	0.816122	1.77758	13.2657	0.000322905	0.00193908
ENSG00000162614.18|mRNA|NEXN|ENSG00000162614.18|ENSG00000162614.18|0|4436	0.815477	10.7933	11.9818	0.000622582	0.00315723
hsa_circ_0081750|circRNA|hsa_circ_0081750|hsa_circ_0081750|hsa_circ_0081750|0|600	0.814301	4.02101	21.4311	5.6571e-06	9.41089e-05
hsa_circ_0000261|circRNA|hsa_circ_0000261|hsa_circ_0000261|hsa_circ_0000261|0|600	0.814144	3.64327	13.7547	0.000251901	0.00161134
ENSG00000185532.15|mRNA|PRKG1|ENSG00000185532.15|ENSG00000185532.15|0|7507	0.813879	6.52395	13.1119	0.000349192	0.00205265
hsa_circ_0042266|circRNA|hsa_circ_0042266|hsa_circ_0042266|hsa_circ_0042266|0|600	0.813821	1.1176	11.9948	0.000618433	0.00314098
hsa_circ_0030036|circRNA|hsa_circ_0030036|hsa_circ_0030036|hsa_circ_0030036|0|600	0.812947	1.03486	11.9265	0.000640528	0.00322376
ENSG00000267060.5|mRNA|PTGES3L|ENSG00000267060.5|ENSG00000267060.5|0|2856	0.812796	5.55732	14.7315	0.000153808	0.00111674
hsa_circ_0044223|circRNA|hsa_circ_0044223|hsa_circ_0044223|hsa_circ_0044223|0|600	0.812756	1.31471	13.5224	0.000283408	0.00175309
ENSG00000198673.10|mRNA|FAM19A2|ENSG00000198673.10|ENSG00000198673.10|0|9255	0.810298	3.00577	17.9819	3.04784e-05	0.000331245
ENSG00000249684.5|lncRNA|AC106795.2|ENSG00000249684.5|ENSG00000249684.5|0|1421	0.809233	2.75544	12.1377	0.000574649	0.00297081
hsa_circ_0058048|circRNA|hsa_circ_0058048|hsa_circ_0058048|hsa_circ_0058048|0|600	0.809144	1.3126	12.2971	0.000529528	0.00279181
hsa_circ_0005085|circRNA|hsa_circ_0005085|hsa_circ_0005085|hsa_circ_0005085|0|438	0.808214	2.77823	16.0887	7.79226e-05	0.00067309
hsa_circ_0073526|circRNA|hsa_circ_0073526|hsa_circ_0073526|hsa_circ_0073526|0|600	0.807526	1.74357	12.9001	0.000389012	0.00223469
hsa_circ_0000259|circRNA|hsa_circ_0000259|hsa_circ_0000259|hsa_circ_0000259|0|600	0.807485	3.81728	21.2073	6.30448e-06	0.000102563
ENSG00000003436.15|mRNA|TFPI|ENSG00000003436.15|ENSG00000003436.15|0|11714	0.807305	8.60095	14.1957	0.000201519	0.00136457
hsa_circ_0001069|circRNA|hsa_circ_0001069|hsa_circ_0001069|hsa_circ_0001069|0|600	0.80722	2.19934	9.84093	0.0018918	0.0073337
ENSG00000176783.14|mRNA|RUFY1|ENSG00000176783.14|ENSG00000176783.14|0|5911	0.806683	11.2062	15.5629	0.000101336	0.000815311
hsa_circ_0001083|circRNA|hsa_circ_0001083|hsa_circ_0001083|hsa_circ_0001083|0|600	0.806652	3.07777	14.9267	0.000139424	0.00103684
hsa_circ_0058042|circRNA|hsa_circ_0058042|hsa_circ_0058042|hsa_circ_0058042|0|600	0.806001	2.3828	14.3951	0.00018222	0.00126457
hsa_circ_0055749|circRNA|hsa_circ_0055749|hsa_circ_0055749|hsa_circ_0055749|0|600	0.805926	2.46855	12.5883	0.000456171	0.00251335
ENSG00000282828.1|lncRNA|AC009971.1|ENSG00000282828.1|ENSG00000282828.1|0|673	0.805714	5.33343	11.3429	0.000865406	0.0040369
hsa_circ_0059424|circRNA|hsa_circ_0059424|hsa_circ_0059424|hsa_circ_0059424|0|600	0.805569	1.16322	12.3462	0.000516376	0.00274424
hsa_circ_0037000|circRNA|hsa_circ_0037000|hsa_circ_0037000|hsa_circ_0037000|0|600	0.804894	4.16721	22.6026	3.21522e-06	6.06694e-05
hsa_circ_0067786|circRNA|hsa_circ_0067786|hsa_circ_0067786|hsa_circ_0067786|0|600	0.803571	2.0511	11.9787	0.000623576	0.00316067
ENSG00000133401.15|mRNA|PDZD2|ENSG00000133401.15|ENSG00000133401.15|0|15642	0.803563	4.05505	17.264	4.34538e-05	0.000432695
hsa_circ_0070060|circRNA|hsa_circ_0070060|hsa_circ_0070060|hsa_circ_0070060|0|600	0.803093	1.61202	13.5126	0.000284816	0.00175926
ENSG00000224897.6|lncRNA|POT1-AS1|ENSG00000224897.6|ENSG00000224897.6|0|6304	0.803	3.53175	14.043	0.000217689	0.00144055
hsa_circ_0007100|circRNA|hsa_circ_0007100|hsa_circ_0007100|hsa_circ_0007100|0|550	0.801892	0.991583	12.2033	0.000555624	0.00289723
hsa_circ_0006014|circRNA|hsa_circ_0006014|hsa_circ_0006014|hsa_circ_0006014|0|600	0.80136	1.18163	13.1147	0.000348705	0.0020516
hsa_circ_0083059|circRNA|hsa_circ_0083059|hsa_circ_0083059|hsa_circ_0083059|0|600	0.801275	0.952324	10.8738	0.00110352	0.00485387
hsa_circ_0000642|circRNA|hsa_circ_0000642|hsa_circ_0000642|hsa_circ_0000642|0|600	0.801087	3.14074	17.7969	3.33915e-05	0.00035444
hsa_circ_0060530|circRNA|hsa_circ_0060530|hsa_circ_0060530|hsa_circ_0060530|0|600	0.800556	0.988968	10.7206	0.00119496	0.00515206
hsa_circ_0036250|circRNA|hsa_circ_0036250|hsa_circ_0036250|hsa_circ_0036250|0|600	0.79996	1.42241	9.71008	0.00202632	0.00770902
hsa_circ_0052606|circRNA|hsa_circ_0052606|hsa_circ_0052606|hsa_circ_0052606|0|600	0.799956	1.23017	9.55271	0.00220114	0.00823363
hsa_circ_0008459|circRNA|hsa_circ_0008459|hsa_circ_0008459|hsa_circ_0008459|0|600	0.799812	1.6344	12.1796	0.000562418	0.00292349
ENSG00000154188.9|mRNA|ANGPT1|ENSG00000154188.9|ENSG00000154188.9|0|7128	0.799311	8.76442	12.0048	0.000615244	0.00312877
hsa_circ_0081004|circRNA|hsa_circ_0081004|hsa_circ_0081004|hsa_circ_0081004|0|600	0.797703	1.66163	10.2152	0.00155508	0.00628584
ENSG00000138722.9|mRNA|MMRN1|ENSG00000138722.9|ENSG00000138722.9|0|5510	0.797275	7.66749	11.4159	0.000833393	0.00392306
ENSG00000255145.2|lncRNA|STX17-AS1|ENSG00000255145.2|ENSG00000255145.2|0|548	0.797268	2.09709	13.681	0.000261491	0.00165464
hsa_circ_0069606|circRNA|hsa_circ_0069606|hsa_circ_0069606|hsa_circ_0069606|0|600	0.797025	0.953505	11.1566	0.000952971	0.00434744
hsa_circ_0070262|circRNA|hsa_circ_0070262|hsa_circ_0070262|hsa_circ_0070262|0|600	0.797023	1.083	11.6287	0.000746695	0.00361564
hsa_circ_0011587|circRNA|hsa_circ_0011587|hsa_circ_0011587|hsa_circ_0011587|0|600	0.796457	1.10706	10.1911	0.00157484	0.00634549
ENSG00000274253.4|lncRNA|AC138649.1|ENSG00000274253.4|ENSG00000274253.4|0|1640	0.796414	3.26552	13.5978	0.000272758	0.0017102
ENSG00000090020.10|mRNA|SLC9A1|ENSG00000090020.10|ENSG00000090020.10|0|5974	0.796118	5.64706	18.6829	2.15883e-05	0.000255082
hsa_circ_0030509|circRNA|hsa_circ_0030509|hsa_circ_0030509|hsa_circ_0030509|0|600	0.795764	1.65824	13.6971	0.000259368	0.00164539
ENSG00000072657.8|mRNA|TRHDE|ENSG00000072657.8|ENSG00000072657.8|0|11950	0.795148	4.4692	11.729	0.000709058	0.00348759
ENSG00000069535.13|mRNA|MAOB|ENSG00000069535.13|ENSG00000069535.13|0|2891	0.794964	4.72343	14.9222	0.00013974	0.00103775
hsa_circ_0026229|circRNA|hsa_circ_0026229|hsa_circ_0026229|hsa_circ_0026229|0|600	0.79461	1.27241	13.6964	0.000259451	0.00164539
hsa_circ_0007458|circRNA|hsa_circ_0007458|hsa_circ_0007458|hsa_circ_0007458|0|600	0.794589	3.27021	15.2671	0.000117523	0.000911742
hsa_circ_0085441|circRNA|hsa_circ_0085441|hsa_circ_0085441|hsa_circ_0085441|0|600	0.793459	1.05604	11.6927	0.000722451	0.00353382
hsa_circ_0004893|circRNA|hsa_circ_0004893|hsa_circ_0004893|hsa_circ_0004893|0|600	0.793444	2.39039	14.4253	0.000179464	0.00125065
hsa_circ_0082600|circRNA|hsa_circ_0082600|hsa_circ_0082600|hsa_circ_0082600|0|600	0.793316	1.11006	9.20401	0.00264547	0.00951043
ENSG00000270240.2|lncRNA|AC015849.1|ENSG00000270240.2|ENSG00000270240.2|0|755	0.793108	2.61988	10.9186	0.00107814	0.00477855
ENSG00000253819.1|lncRNA|LINC01151|ENSG00000253819.1|ENSG00000253819.1|0|571	0.791446	6.87104	11.298	0.000885759	0.00411422
ENSG00000272168.6|lncRNA|CASC15|ENSG00000272168.6|ENSG00000272168.6|0|13289	0.789694	5.83881	15.201	0.000121481	0.000935858
ENSG00000247345.2|lncRNA|AC092343.1|ENSG00000247345.2|ENSG00000247345.2|0|729	0.789327	3.49396	11.6033	0.00075653	0.00364117
hsa_circ_0047864|circRNA|hsa_circ_0047864|hsa_circ_0047864|hsa_circ_0047864|0|600	0.788957	1.34835	11.6617	0.000734084	0.00357571
hsa_circ_0006935|circRNA|hsa_circ_0006935|hsa_circ_0006935|hsa_circ_0006935|0|600	0.788554	1.39322	11.8541	0.000664835	0.0033142
hsa_circ_0030608|circRNA|hsa_circ_0030608|hsa_circ_0030608|hsa_circ_0030608|0|600	0.787554	1.51266	13.0302	0.000364036	0.00212177
hsa_circ_0080849|circRNA|hsa_circ_0080849|hsa_circ_0080849|hsa_circ_0080849|0|600	0.787387	1.66584	11.7229	0.000711301	0.00349345
hsa_circ_0007137|circRNA|hsa_circ_0007137|hsa_circ_0007137|hsa_circ_0007137|0|600	0.787149	1.91262	13.4989	0.000286804	0.00176826
ENSG00000137225.12|mRNA|CAPN11|ENSG00000137225.12|ENSG00000137225.12|0|3549	0.786891	3.33446	10.7441	0.00118041	0.00510805
hsa_circ_0000084|circRNA|hsa_circ_0000084|hsa_circ_0000084|hsa_circ_0000084|0|600	0.786146	1.4935	11.7356	0.00070667	0.0034809
hsa_circ_0046843|circRNA|hsa_circ_0046843|hsa_circ_0046843|hsa_circ_0046843|0|600	0.785003	5.58393	21.0595	6.77242e-06	0.000108438
hsa_circ_0002477|circRNA|hsa_circ_0002477|hsa_circ_0002477|hsa_circ_0002477|0|600	0.784562	1.34922	11.6245	0.000748308	0.00361818
hsa_circ_0031572|circRNA|hsa_circ_0031572|hsa_circ_0031572|hsa_circ_0031572|0|600	0.784416	1.61544	12.3685	0.000510516	0.00272544
hsa_circ_0080851|circRNA|hsa_circ_0080851|hsa_circ_0080851|hsa_circ_0080851|0|600	0.784319	1.36985	11.7818	0.000690051	0.00341007
ENSG00000152061.23|mRNA|RABGAP1L|ENSG00000152061.23|ENSG00000152061.23|0|16071	0.783492	10.6059	22.6433	3.15292e-06	5.98905e-05
hsa_circ_0005745|circRNA|hsa_circ_0005745|hsa_circ_0005745|hsa_circ_0005745|0|600	0.78228	1.90453	13.9359	0.00022981	0.00150281
ENSG00000102362.15|mRNA|SYTL4|ENSG00000102362.15|ENSG00000102362.15|0|7428	0.781823	7.65031	12.7823	0.000413106	0.00233081
hsa_circ_0039288|circRNA|hsa_circ_0039288|hsa_circ_0039288|hsa_circ_0039288|0|600	0.781705	1.14661	12.9161	0.00038585	0.00221972
hsa_circ_0004771|circRNA|hsa_circ_0004771|hsa_circ_0004771|hsa_circ_0004771|0|406	0.78164	7.89375	15.2519	0.000118421	0.000917361
hsa_circ_0023940|circRNA|hsa_circ_0023940|hsa_circ_0023940|hsa_circ_0023940|0|600	0.780568	2.83027	13.9792	0.000224828	0.00147701
ENSG00000215039.6|lncRNA|CD27-AS1|ENSG00000215039.6|ENSG00000215039.6|0|3411	0.780405	5.938	15.615	9.87292e-05	0.000799819
hsa_circ_0001085|circRNA|hsa_circ_0001085|hsa_circ_0001085|hsa_circ_0001085|0|600	0.780057	3.55252	15.9574	8.32016e-05	0.000704055
hsa_circ_0028252|circRNA|hsa_circ_0028252|hsa_circ_0028252|hsa_circ_0028252|0|600	0.779974	2.16824	12.0435	0.000603139	0.00307899
hsa_circ_0024173|circRNA|hsa_circ_0024173|hsa_circ_0024173|hsa_circ_0024173|0|600	0.779675	2.88606	11.214	0.000925077	0.00425228
hsa_circ_0028255|circRNA|hsa_circ_0028255|hsa_circ_0028255|hsa_circ_0028255|0|600	0.779536	1.20608	11.1552	0.000953703	0.00434912
hsa_circ_0085601|circRNA|hsa_circ_0085601|hsa_circ_0085601|hsa_circ_0085601|0|600	0.779392	1.97058	11.1974	0.000933059	0.00428305
ENSG00000142856.16|mRNA|ITGB3BP|ENSG00000142856.16|ENSG00000142856.16|0|5459	0.779256	8.05188	18.1864	2.75581e-05	0.000306551
hsa_circ_0061722|circRNA|hsa_circ_0061722|hsa_circ_0061722|hsa_circ_0061722|0|600	0.779071	1.90405	12.5096	0.000474917	0.00258239
ENSG00000234927.1|pseudogene|HMGN1P18|ENSG00000234927.1|ENSG00000234927.1|0|277	0.777453	2.04868	9.37616	0.00241568	0.00886489
hsa_circ_0076078|circRNA|hsa_circ_0076078|hsa_circ_0076078|hsa_circ_0076078|0|476	0.777247	1.09255	12.2917	0.000530994	0.00279806
hsa_circ_0015261|circRNA|hsa_circ_0015261|hsa_circ_0015261|hsa_circ_0015261|0|600	0.776913	0.964093	11.2774	0.000895236	0.00414762
hsa_circ_0018883|circRNA|hsa_circ_0018883|hsa_circ_0018883|hsa_circ_0018883|0|600	0.776427	1.24339	9.10488	0.00278781	0.00987792
ENSG00000178732.5|mRNA|GP5|ENSG00000178732.5|ENSG00000178732.5|0|3534	0.776274	3.11935	11.2646	0.000901173	0.00416585
ENSG00000225630.1|pseudogene|MTND2P28|ENSG00000225630.1|ENSG00000225630.1|0|1044	0.775793	4.34748	8.4738	0.00389758	0.0127815
hsa_circ_0057294|circRNA|hsa_circ_0057294|hsa_circ_0057294|hsa_circ_0057294|0|600	0.775785	1.09309	10.8996	0.00108883	0.00481266
ENSG00000099954.18|mRNA|CECR2|ENSG00000099954.18|ENSG00000099954.18|0|10759	0.774459	3.29492	14.7165	0.000154971	0.00112192
ENSG00000166086.12|mRNA|JAM3|ENSG00000166086.12|ENSG00000166086.12|0|5451	0.774267	9.66282	11.5946	0.000759921	0.00365308
hsa_circ_0086462|circRNA|hsa_circ_0086462|hsa_circ_0086462|hsa_circ_0086462|0|600	0.773913	1.11882	11.1893	0.000937006	0.00429721
hsa_circ_0017243|circRNA|hsa_circ_0017243|hsa_circ_0017243|hsa_circ_0017243|0|600	0.773827	2.27375	10.5012	0.00133948	0.00558678
hsa_circ_0019011|circRNA|hsa_circ_0019011|hsa_circ_0019011|hsa_circ_0019011|0|196	0.7734	1.06104	10.4102	0.00140459	0.00580731
ENSG00000185052.11|mRNA|SLC24A3|ENSG00000185052.11|ENSG00000185052.11|0|3933	0.772091	7.29652	11.6008	0.000757519	0.00364329
hsa_circ_0015067|circRNA|hsa_circ_0015067|hsa_circ_0015067|hsa_circ_0015067|0|600	0.771909	1.01135	9.11324	0.00277552	0.00984487
ENSG00000160188.9|mRNA|RSPH1|ENSG00000160188.9|ENSG00000160188.9|0|2988	0.770933	4.533	11.6275	0.000747159	0.00361701
hsa_circ_0052941|circRNA|hsa_circ_0052941|hsa_circ_0052941|hsa_circ_0052941|0|600	0.770821	2.15562	13.3922	0.000302782	0.00184417
ENSG00000179399.14|mRNA|GPC5|ENSG00000179399.14|ENSG00000179399.14|0|3544	0.770692	3.489	12.222	0.000550333	0.00287265
hsa_circ_0005348|circRNA|hsa_circ_0005348|hsa_circ_0005348|hsa_circ_0005348|0|600	0.770132	3.10336	13.0976	0.000351754	0.00206406
hsa_circ_0003844|circRNA|hsa_circ_0003844|hsa_circ_0003844|hsa_circ_0003844|0|600	0.769927	1.41111	11.1162	0.000973138	0.00441549
hsa_circ_0007664|circRNA|hsa_circ_0007664|hsa_circ_0007664|hsa_circ_0007664|0|600	0.769699	2.55757	14.0766	0.000214024	0.0014229
ENSG00000273143.1|lncRNA|AL355512.1|ENSG00000273143.1|ENSG00000273143.1|0|628	0.76955	3.24304	9.03734	0.00288926	0.0101441
hsa_circ_0012823|circRNA|hsa_circ_0012823|hsa_circ_0012823|hsa_circ_0012823|0|600	0.769469	2.7198	12.7048	0.00042979	0.00240454
ENSG00000182093.14|mRNA|WRB|ENSG00000182093.14|ENSG00000182093.14|0|5558	0.769282	7.27778	13.5374	0.000281254	0.0017432
hsa_circ_0031568|circRNA|hsa_circ_0031568|hsa_circ_0031568|hsa_circ_0031568|0|600	0.769054	1.39468	11.9214	0.000642201	0.003228
hsa_circ_0013082|circRNA|hsa_circ_0013082|hsa_circ_0013082|hsa_circ_0013082|0|600	0.769045	1.24754	10.9872	0.00104042	0.00464959
ENSG00000127249.14|mRNA|ATP13A4|ENSG00000127249.14|ENSG00000127249.14|0|6013	0.769019	3.81624	14.5398	0.000169396	0.00120021
hsa_circ_0071037|circRNA|hsa_circ_0071037|hsa_circ_0071037|hsa_circ_0071037|0|600	0.768813	3.44052	11.3508	0.000861878	0.00402391
hsa_circ_0078224|circRNA|hsa_circ_0078224|hsa_circ_0078224|hsa_circ_0078224|0|600	0.768764	1.37048	10.7545	0.00117407	0.00508838
hsa_circ_0067682|circRNA|hsa_circ_0067682|hsa_circ_0067682|hsa_circ_0067682|0|600	0.768461	2.56803	11.9438	0.000634845	0.00320435
hsa_circ_0081808|circRNA|hsa_circ_0081808|hsa_circ_0081808|hsa_circ_0081808|0|600	0.767639	1.18995	9.29167	0.0025258	0.00918117
ENSG00000205663.5|lncRNA|FAM239B|ENSG00000205663.5|ENSG00000205663.5|0|3700	0.767245	6.14448	7.12754	0.00804189	0.0223517
ENSG00000222022.1|lncRNA|AC112721.1|ENSG00000222022.1|ENSG00000222022.1|0|588	0.766955	3.01141	12.2011	0.000556245	0.00289896
ENSG00000237990.3|lncRNA|CNTN4-AS1|ENSG00000237990.3|ENSG00000237990.3|0|2078	0.766914	3.38318	5.92609	0.015554	0.0372642
ENSG00000164116.16|mRNA|GUCY1A3|ENSG00000164116.16|ENSG00000164116.16|0|5766	0.766687	8.38733	14.91	0.000140595	0.00104166
hsa_circ_0025969|circRNA|hsa_circ_0025969|hsa_circ_0025969|hsa_circ_0025969|0|600	0.766662	1.11312	11.2949	0.000887159	0.00411976
hsa_circ_0001194|circRNA|hsa_circ_0001194|hsa_circ_0001194|hsa_circ_0001194|0|600	0.766184	1.06004	9.76158	0.00197224	0.00755743
hsa_circ_0060525|circRNA|hsa_circ_0060525|hsa_circ_0060525|hsa_circ_0060525|0|600	0.765103	1.16801	10.2726	0.00150916	0.00613539
hsa_circ_0080854|circRNA|hsa_circ_0080854|hsa_circ_0080854|hsa_circ_0080854|0|600	0.764781	2.06539	11.3558	0.000859668	0.00401641
hsa_circ_0017237|circRNA|hsa_circ_0017237|hsa_circ_0017237|hsa_circ_0017237|0|600	0.764749	1.24847	7.72291	0.00582776	0.0174083
hsa_circ_0034568|circRNA|hsa_circ_0034568|hsa_circ_0034568|hsa_circ_0034568|0|600	0.764679	1.53699	10.8663	0.00110782	0.00486579
ENSG00000205038.11|mRNA|PKHD1L1|ENSG00000205038.11|ENSG00000205038.11|0|13728	0.76419	9.39723	11.8155	0.000678185	0.00336843
hsa_circ_0001693|circRNA|hsa_circ_0001693|hsa_circ_0001693|hsa_circ_0001693|0|600	0.763842	1.94726	12.3893	0.000505085	0.00270525
ENSG00000205126.2|mRNA|ACCSL|ENSG00000205126.2|ENSG00000205126.2|0|1867	0.763819	3.47462	10.1653	0.00159625	0.00641078
hsa_circ_0016867|circRNA|hsa_circ_0016867|hsa_circ_0016867|hsa_circ_0016867|0|600	0.763563	1.08979	12.3135	0.000525096	0.00277726
hsa_circ_0003501|circRNA|hsa_circ_0003501|hsa_circ_0003501|hsa_circ_0003501|0|600	0.763474	1.09539	11.914	0.000644646	0.00323784
hsa_circ_0080831|circRNA|hsa_circ_0080831|hsa_circ_0080831|hsa_circ_0080831|0|600	0.763023	2.98985	11.4058	0.000837719	0.00393833
hsa_circ_0000371|circRNA|hsa_circ_0000371|hsa_circ_0000371|hsa_circ_0000371|0|354	0.762452	1.15494	9.6654	0.00207446	0.00785234
hsa_circ_0057023|circRNA|hsa_circ_0057023|hsa_circ_0057023|hsa_circ_0057023|0|600	0.762251	3.05592	10.8669	0.00110747	0.00486533
hsa_circ_0008243|circRNA|hsa_circ_0008243|hsa_circ_0008243|hsa_circ_0008243|0|600	0.762093	4.9362	10.7064	0.00120381	0.0051768
ENSG00000184838.14|mRNA|PRR16|ENSG00000184838.14|ENSG00000184838.14|0|2274	0.762045	2.85972	11.482	0.000805401	0.0038247
ENSG00000103740.9|mRNA|ACSBG1|ENSG00000103740.9|ENSG00000103740.9|0|8230	0.762027	4.93717	12.3972	0.000503046	0.00269711
hsa_circ_0070194|circRNA|hsa_circ_0070194|hsa_circ_0070194|hsa_circ_0070194|0|600	0.761961	1.2857	9.80891	0.00192384	0.0074235
hsa_circ_0039299|circRNA|hsa_circ_0039299|hsa_circ_0039299|hsa_circ_0039299|0|600	0.761932	1.17148	10.6749	0.0012237	0.00523973
ENSG00000283403.1|lncRNA|AC005394.2|ENSG00000283403.1|ENSG00000283403.1|0|3113	0.761616	3.8708	11.9086	0.000646447	0.00324362
hsa_circ_0004768|circRNA|hsa_circ_0004768|hsa_circ_0004768|hsa_circ_0004768|0|600	0.761481	2.9708	14.5713	0.000166728	0.00118781
ENSG00000138798.11|mRNA|EGF|ENSG00000138798.11|ENSG00000138798.11|0|6127	0.761062	8.54026	10.5394	0.00131313	0.00551261
ENSG00000188549.12|mRNA|C15orf52|ENSG00000188549.12|ENSG00000188549.12|0|7510	0.76033	4.16528	17.1141	4.68032e-05	0.000458267
hsa_circ_0008800|circRNA|hsa_circ_0008800|hsa_circ_0008800|hsa_circ_0008800|0|600	0.760298	2.52726	12.1103	0.000582798	0.00300204
ENSG00000228409.6|pseudogene|CCT6P1|ENSG00000228409.6|ENSG00000228409.6|0|1670	0.758816	6.47803	14.2093	0.000200137	0.00136098
hsa_circ_0017250|circRNA|hsa_circ_0017250|hsa_circ_0017250|hsa_circ_0017250|0|600	0.757915	3.52308	12.0021	0.000616116	0.00313195
hsa_circ_0088060|circRNA|hsa_circ_0088060|hsa_circ_0088060|hsa_circ_0088060|0|600	0.757535	1.90544	11.728	0.000709434	0.00348841
hsa_circ_0068221|circRNA|hsa_circ_0068221|hsa_circ_0068221|hsa_circ_0068221|0|600	0.757488	2.9712	18.0953	2.88231e-05	0.000316911
ENSG00000235191.1|lncRNA|NUCB1-AS1|ENSG00000235191.1|ENSG00000235191.1|0|433	0.757012	2.72642	14.2032	0.000200756	0.00136332
ENSG00000279220.1|lncRNA|GPR1-AS|ENSG00000279220.1|ENSG00000279220.1|0|4129	0.756652	1.73267	8.57762	0.00368786	0.0122346
ENSG00000280227.1|lncRNA|AC079416.3|ENSG00000280227.1|ENSG00000280227.1|0|549	0.75574	7.05605	13.4825	0.000289212	0.0017809
ENSG00000231131.6|lncRNA|LINC01468|ENSG00000231131.6|ENSG00000231131.6|0|1177	0.75566	3.45653	10.9172	0.0010789	0.00477982
ENSG00000267243.6|lncRNA|AC005381.1|ENSG00000267243.6|ENSG00000267243.6|0|1270	0.75473	3.6532	11.7185	0.000712923	0.00349797
hsa_circ_0037825|circRNA|hsa_circ_0037825|hsa_circ_0037825|hsa_circ_0037825|0|600	0.754411	1.28394	7.81032	0.00555994	0.0167842
ENSG00000166153.16|mRNA|DEPDC4|ENSG00000166153.16|ENSG00000166153.16|0|3118	0.753252	3.41324	12.1566	0.000569106	0.00294941
hsa_circ_0007355|circRNA|hsa_circ_0007355|hsa_circ_0007355|hsa_circ_0007355|0|600	0.753175	1.81075	12.0201	0.000610431	0.0031067
ENSG00000140416.19|mRNA|TPM1|ENSG00000140416.19|ENSG00000140416.19|0|12492	0.752965	9.97668	15.2176	0.000120473	0.000930606
hsa_circ_0073147|circRNA|hsa_circ_0073147|hsa_circ_0073147|hsa_circ_0073147|0|600	0.752603	1.1001	11.0123	0.00102697	0.00460394
hsa_circ_0062688|circRNA|hsa_circ_0062688|hsa_circ_0062688|hsa_circ_0062688|0|600	0.752598	3.66656	18.4832	2.38137e-05	0.000273912
ENSG00000274767.1|lncRNA|AC243829.1|ENSG00000274767.1|ENSG00000274767.1|0|1401	0.752423	1.90009	10.6892	0.00121459	0.00521108
ENSG00000222032.1|lncRNA|AC112721.2|ENSG00000222032.1|ENSG00000222032.1|0|541	0.752098	3.08285	9.70557	0.00203114	0.00771932
ENSG00000224786.2|pseudogene|CETN4P|ENSG00000224786.2|ENSG00000224786.2|0|3858	0.751861	2.85863	10.6755	0.00122331	0.00523938
hsa_circ_0042519|circRNA|hsa_circ_0042519|hsa_circ_0042519|hsa_circ_0042519|0|600	0.751291	2.39687	11.9445	0.000634624	0.00320435
hsa_circ_0031607|circRNA|hsa_circ_0031607|hsa_circ_0031607|hsa_circ_0031607|0|600	0.751	2.59489	10.8105	0.00114037	0.00497492
hsa_circ_0017239|circRNA|hsa_circ_0017239|hsa_circ_0017239|hsa_circ_0017239|0|600	0.750977	1.83508	8.94298	0.00303733	0.0105136
ENSG00000158560.14|mRNA|DYNC1I1|ENSG00000158560.14|ENSG00000158560.14|0|4568	0.750844	5.45249	12.5038	0.000476328	0.00258702
ENSG00000232788.1|lncRNA|AC078883.3|ENSG00000232788.1|ENSG00000232788.1|0|1077	0.750355	5.35175	12.0959	0.000587135	0.00302048
ENSG00000101888.11|mRNA|NXT2|ENSG00000101888.11|ENSG00000101888.11|0|3064	0.750254	4.03418	19.6451	1.34774e-05	0.000180649
hsa_circ_0091452|circRNA|hsa_circ_0091452|hsa_circ_0091452|hsa_circ_0091452|0|600	0.749994	1.31376	8.61836	0.00360876	0.0120207
hsa_circ_0001890|circRNA|hsa_circ_0001890|hsa_circ_0001890|hsa_circ_0001890|0|600	0.748359	1.89779	14.388	0.000182874	0.00126867
hsa_circ_0060627|circRNA|hsa_circ_0060627|hsa_circ_0060627|hsa_circ_0060627|0|600	0.748329	1.67983	10.3792	0.00142752	0.00587504
ENSG00000164211.12|mRNA|STARD4|ENSG00000164211.12|ENSG00000164211.12|0|5684	0.748123	4.11656	18.3647	2.52432e-05	0.000287044
ENSG00000249055.1|pseudogene|TBCAP3|ENSG00000249055.1|ENSG00000249055.1|0|312	0.747784	3.10022	14.1231	0.000209047	0.00140101
hsa_circ_0011889|circRNA|hsa_circ_0011889|hsa_circ_0011889|hsa_circ_0011889|0|600	0.746448	1.27999	9.71151	0.0020248	0.00770553
hsa_circ_0072864|circRNA|hsa_circ_0072864|hsa_circ_0072864|hsa_circ_0072864|0|600	0.746344	0.935415	8.91593	0.0030812	0.0106286
hsa_circ_0017705|circRNA|hsa_circ_0017705|hsa_circ_0017705|hsa_circ_0017705|0|600	0.746217	3.13573	13.591	0.000273703	0.00171344
ENSG00000107798.17|mRNA|LIPA|ENSG00000107798.17|ENSG00000107798.17|0|4910	0.746085	7.61282	13.3315	0.000312278	0.00188653
hsa_circ_0011725|circRNA|hsa_circ_0011725|hsa_circ_0011725|hsa_circ_0011725|0|600	0.746015	1.20707	10.261	0.00151832	0.00616635
ENSG00000165682.14|mRNA|CLEC1B|ENSG00000165682.14|ENSG00000165682.14|0|3670	0.745907	9.00538	14.3463	0.000186762	0.00128981
hsa_circ_0007992|circRNA|hsa_circ_0007992|hsa_circ_0007992|hsa_circ_0007992|0|600	0.744774	3.50396	12.8765	0.000393726	0.00225398
ENSG00000106477.18|mRNA|CEP41|ENSG00000106477.18|ENSG00000106477.18|0|12566	0.744418	3.51832	16.1554	7.53749e-05	0.000656125
hsa_circ_0005257|circRNA|hsa_circ_0005257|hsa_circ_0005257|hsa_circ_0005257|0|600	0.744234	2.11896	11.0946	0.000984083	0.00445776
ENSG00000163536.12|mRNA|SERPINI1|ENSG00000163536.12|ENSG00000163536.12|0|2418	0.744224	3.43642	12.6845	0.000434277	0.00242149
hsa_circ_0034734|circRNA|hsa_circ_0034734|hsa_circ_0034734|hsa_circ_0034734|0|600	0.743565	1.62218	12.4713	0.00048431	0.00261564
hsa_circ_0004340|circRNA|hsa_circ_0004340|hsa_circ_0004340|hsa_circ_0004340|0|600	0.742957	1.21482	12.1649	0.000566699	0.00294344
hsa_circ_0055976|circRNA|hsa_circ_0055976|hsa_circ_0055976|hsa_circ_0055976|0|600	0.742877	0.954034	8.8294	0.00322591	0.0110059
hsa_circ_0058050|circRNA|hsa_circ_0058050|hsa_circ_0058050|hsa_circ_0058050|0|600	0.741941	2.09848	10.8691	0.00110621	0.00486084
ENSG00000135862.5|mRNA|LAMC1|ENSG00000135862.5|ENSG00000135862.5|0|8406	0.741838	5.22208	12.6443	0.000443306	0.0024574
ENSG00000187672.12|mRNA|ERC2|ENSG00000187672.12|ENSG00000187672.12|0|7933	0.74157	4.54679	13.1745	0.000338236	0.00200837
hsa_circ_0035947|circRNA|hsa_circ_0035947|hsa_circ_0035947|hsa_circ_0035947|0|600	0.740971	1.02771	10.1273	0.00162827	0.00651472
hsa_circ_0030228|circRNA|hsa_circ_0030228|hsa_circ_0030228|hsa_circ_0030228|0|600	0.740961	2.84309	9.00984	0.00293163	0.0102498
hsa_circ_0083458|circRNA|hsa_circ_0083458|hsa_circ_0083458|hsa_circ_0083458|0|600	0.74093	1.2436	9.74599	0.00198846	0.00759911
hsa_circ_0032029|circRNA|hsa_circ_0032029|hsa_circ_0032029|hsa_circ_0032029|0|600	0.739613	2.29953	11.5546	0.000775804	0.00371511
hsa_circ_0018411|circRNA|hsa_circ_0018411|hsa_circ_0018411|hsa_circ_0018411|0|334	0.739533	1.11579	10.7271	0.00119092	0.00514058
ENSG00000163743.13|mRNA|RCHY1|ENSG00000163743.13|ENSG00000163743.13|0|6565	0.739387	6.72857	20.024	1.12025e-05	0.000157904
ENSG00000236320.3|mRNA|SLFN14|ENSG00000236320.3|ENSG00000236320.3|0|2889	0.739213	6.54693	13.8456	0.000240562	0.00155316
hsa_circ_0001317|circRNA|hsa_circ_0001317|hsa_circ_0001317|hsa_circ_0001317|0|600	0.738927	4.86614	16.4687	6.44852e-05	0.000581708
hsa_circ_0001434|circRNA|hsa_circ_0001434|hsa_circ_0001434|hsa_circ_0001434|0|600	0.738806	3.02696	12.8954	0.000389951	0.00223944
hsa_circ_0077090|circRNA|hsa_circ_0077090|hsa_circ_0077090|hsa_circ_0077090|0|600	0.737483	1.09991	10.2573	0.00152129	0.00617339
ENSG00000087303.17|mRNA|NID2|ENSG00000087303.17|ENSG00000087303.17|0|6392	0.737178	4.31167	14.082	0.000213436	0.00142042
hsa_circ_0007572|circRNA|hsa_circ_0007572|hsa_circ_0007572|hsa_circ_0007572|0|600	0.737157	1.18067	9.82303	0.00190964	0.00738566
hsa_circ_0002748|circRNA|hsa_circ_0002748|hsa_circ_0002748|hsa_circ_0002748|0|600	0.736931	1.25274	9.59729	0.00215011	0.00809588
hsa_circ_0001541|circRNA|hsa_circ_0001541|hsa_circ_0001541|hsa_circ_0001541|0|600	0.736663	3.24974	14.0412	0.000217884	0.00144136
hsa_circ_0070820|circRNA|hsa_circ_0070820|hsa_circ_0070820|hsa_circ_0070820|0|600	0.735824	1.22966	7.79802	0.00559685	0.0168752
ENSG00000259278.1|lncRNA|AC087878.1|ENSG00000259278.1|ENSG00000259278.1|0|574	0.735568	2.6857	9.95175	0.001785	0.00700547
hsa_circ_0001769|circRNA|hsa_circ_0001769|hsa_circ_0001769|hsa_circ_0001769|0|600	0.735541	4.80526	13.5447	0.000280218	0.0017383
ENSG00000240409.1|pseudogene|MTATP8P1|ENSG00000240409.1|ENSG00000240409.1|0|207	0.735165	2.16516	9.35839	0.00243842	0.00893685
ENSG00000263465.4|mRNA|SRSF8|ENSG00000263465.4|ENSG00000263465.4|0|4028	0.734755	4.66965	13.5567	0.000278518	0.00173162
hsa_circ_0091409|circRNA|hsa_circ_0091409|hsa_circ_0091409|hsa_circ_0091409|0|600	0.734726	1.85618	9.03266	0.00289642	0.0101579
hsa_circ_0029812|circRNA|hsa_circ_0029812|hsa_circ_0029812|hsa_circ_0029812|0|600	0.734707	3.54904	13.8261	0.000242955	0.00156567
hsa_circ_0004238|circRNA|hsa_circ_0004238|hsa_circ_0004238|hsa_circ_0004238|0|600	0.734614	1.77637	10.2855	0.00149901	0.00610817
ENSG00000233108.1|lncRNA|AC006042.2|ENSG00000233108.1|ENSG00000233108.1|0|568	0.734576	2.0116	11.7243	0.000710781	0.00349176
ENSG00000165121.11|pseudogene|AL353743.1|ENSG00000165121.11|ENSG00000165121.11|0|2067	0.734562	5.48787	26.2532	5.642e-07	1.60987e-05
hsa_circ_0077093|circRNA|hsa_circ_0077093|hsa_circ_0077093|hsa_circ_0077093|0|600	0.734291	1.2467	9.76335	0.00197041	0.00755331
hsa_circ_0085644|circRNA|hsa_circ_0085644|hsa_circ_0085644|hsa_circ_0085644|0|600	0.734142	1.83318	11.4569	0.000815916	0.0038633
hsa_circ_0003030|circRNA|hsa_circ_0003030|hsa_circ_0003030|hsa_circ_0003030|0|600	0.733841	2.9819	11.1039	0.000979359	0.00443838
ENSG00000238201.1|lncRNA|AC114752.2|ENSG00000238201.1|ENSG00000238201.1|0|404	0.73369	7.79685	12.4315	0.000494288	0.0026573
hsa_circ_0070804|circRNA|hsa_circ_0070804|hsa_circ_0070804|hsa_circ_0070804|0|600	0.733609	2.38092	9.72783	0.00200751	0.00765873
hsa_circ_0001577|circRNA|hsa_circ_0001577|hsa_circ_0001577|hsa_circ_0001577|0|600	0.73357	4.38903	16.5967	6.05068e-05	0.000553893
hsa_circ_0001862|circRNA|hsa_circ_0001862|hsa_circ_0001862|hsa_circ_0001862|0|600	0.733478	1.1816	9.50889	0.0022525	0.00839151
hsa_circ_0017242|circRNA|hsa_circ_0017242|hsa_circ_0017242|hsa_circ_0017242|0|600	0.732992	3.27952	15.3779	0.000111172	0.000874343
hsa_circ_0035948|circRNA|hsa_circ_0035948|hsa_circ_0035948|hsa_circ_0035948|0|600	0.732915	2.05095	9.35177	0.00244696	0.00895465
ENSG00000250334.5|lncRNA|LINC00989|ENSG00000250334.5|ENSG00000250334.5|0|2231	0.732689	9.16955	10.2199	0.00155134	0.00627233
ENSG00000042317.16|mRNA|SPATA7|ENSG00000042317.16|ENSG00000042317.16|0|6872	0.732521	3.32965	14.2062	0.000200452	0.00136265
hsa_circ_0001998|circRNA|hsa_circ_0001998|hsa_circ_0001998|hsa_circ_0001998|0|600	0.732412	1.8885	9.11256	0.00277651	0.00984664
hsa_circ_0029934|circRNA|hsa_circ_0029934|hsa_circ_0029934|hsa_circ_0029934|0|600	0.732266	1.28253	10.2565	0.00152189	0.00617383
ENSG00000075790.10|mRNA|BCAP29|ENSG00000075790.10|ENSG00000075790.10|0|8409	0.732171	6.21004	24.402	1.35851e-06	3.16536e-05
hsa_circ_0060740|circRNA|hsa_circ_0060740|hsa_circ_0060740|hsa_circ_0060740|0|600	0.73209	1.09917	10.4317	0.00138891	0.00575562
ENSG00000255325.2|lncRNA|AC108136.1|ENSG00000255325.2|ENSG00000255325.2|0|631	0.731763	6.25917	9.98983	0.00174974	0.00689831
ENSG00000128609.14|mRNA|NDUFA5|ENSG00000128609.14|ENSG00000128609.14|0|9851	0.731384	8.39041	19.7295	1.2933e-05	0.000175118
hsa_circ_0010474|circRNA|hsa_circ_0010474|hsa_circ_0010474|hsa_circ_0010474|0|600	0.731361	3.86455	10.6293	0.00125308	0.00532897
hsa_circ_0006316|circRNA|hsa_circ_0006316|hsa_circ_0006316|hsa_circ_0006316|0|342	0.731128	1.06284	10.1101	0.00164296	0.00656954
hsa_circ_0072688|circRNA|hsa_circ_0072688|hsa_circ_0072688|hsa_circ_0072688|0|600	0.731089	2.24318	10.7199	0.00119539	0.00515281
hsa_circ_0005197|circRNA|hsa_circ_0005197|hsa_circ_0005197|hsa_circ_0005197|0|600	0.73087	4.54982	14.1042	0.000211056	0.00141069
ENSG00000144306.14|mRNA|SCRN3|ENSG00000144306.14|ENSG00000144306.14|0|4144	0.730756	4.7807	28.8737	1.6469e-07	6.40249e-06
ENSG00000101856.9|mRNA|PGRMC1|ENSG00000101856.9|ENSG00000101856.9|0|1919	0.730632	9.76149	11.4486	0.000819413	0.00387555
hsa_circ_0017701|circRNA|hsa_circ_0017701|hsa_circ_0017701|hsa_circ_0017701|0|600	0.730373	1.06937	10.5425	0.001311	0.00550787
hsa_circ_0006097|circRNA|hsa_circ_0006097|hsa_circ_0006097|hsa_circ_0006097|0|600	0.729929	1.53825	12.186	0.000560572	0.00291541
hsa_circ_0005570|circRNA|hsa_circ_0005570|hsa_circ_0005570|hsa_circ_0005570|0|600	0.72992	1.09251	7.33668	0.00717937	0.0204795
hsa_circ_0082574|circRNA|hsa_circ_0082574|hsa_circ_0082574|hsa_circ_0082574|0|600	0.729648	1.53368	12.056	0.000599271	0.00306552
hsa_circ_0008166|circRNA|hsa_circ_0008166|hsa_circ_0008166|hsa_circ_0008166|0|600	0.729486	1.4338	10.4041	0.00140905	0.00581492
hsa_circ_0008190|circRNA|hsa_circ_0008190|hsa_circ_0008190|hsa_circ_0008190|0|544	0.729173	1.06081	9.85248	0.00188036	0.00729646
hsa_circ_0005787|circRNA|hsa_circ_0005787|hsa_circ_0005787|hsa_circ_0005787|0|600	0.728836	1.1002	8.13612	0.00466811	0.0147001
hsa_circ_0067738|circRNA|hsa_circ_0067738|hsa_circ_0067738|hsa_circ_0067738|0|600	0.728724	1.05011	9.843	0.00188974	0.00732716
hsa_circ_0068222|circRNA|hsa_circ_0068222|hsa_circ_0068222|hsa_circ_0068222|0|600	0.7284	1.46292	11.7786	0.000691192	0.00341318
ENSG00000066697.14|mRNA|MSANTD3|ENSG00000066697.14|ENSG00000066697.14|0|3253	0.728386	7.32788	14.4554	0.000176758	0.00123874
hsa_circ_0070793|circRNA|hsa_circ_0070793|hsa_circ_0070793|hsa_circ_0070793|0|600	0.728337	1.34979	10.0345	0.00170925	0.00676945
hsa_circ_0054203|circRNA|hsa_circ_0054203|hsa_circ_0054203|hsa_circ_0054203|0|548	0.728094	1.19328	10.314	0.00147688	0.00603739
ENSG00000126217.20|mRNA|MCF2L|ENSG00000126217.20|ENSG00000126217.20|0|23148	0.728064	5.15101	16.1361	7.61054e-05	0.000660541
hsa_circ_0088370|circRNA|hsa_circ_0088370|hsa_circ_0088370|hsa_circ_0088370|0|600	0.727674	1.10777	8.4251	0.00400011	0.0130534
hsa_circ_0003175|circRNA|hsa_circ_0003175|hsa_circ_0003175|hsa_circ_0003175|0|600	0.726764	1.43498	9.64629	0.00209541	0.00792433
ENSG00000229056.2|lncRNA|AC020571.1|ENSG00000229056.2|ENSG00000229056.2|0|1607	0.726392	4.57634	8.04768	0.00489464	0.0152251
hsa_circ_0077892|circRNA|hsa_circ_0077892|hsa_circ_0077892|hsa_circ_0077892|0|600	0.726379	3.10176	12.5242	0.000471386	0.00257161
ENSG00000121766.15|mRNA|ZCCHC17|ENSG00000121766.15|ENSG00000121766.15|0|1921	0.726372	9.02762	17.8759	3.21155e-05	0.000343975
hsa_circ_0075796|circRNA|hsa_circ_0075796|hsa_circ_0075796|hsa_circ_0075796|0|600	0.725774	5.01593	15.1246	0.000126233	0.000961398
ENSG00000049130.14|mRNA|KITLG|ENSG00000049130.14|ENSG00000049130.14|0|6030	0.725643	4.81043	15.7625	9.17096e-05	0.000758982
ENSG00000110090.12|mRNA|CPT1A|ENSG00000110090.12|ENSG00000110090.12|0|6565	0.725329	7.4514	24.644	1.21055e-06	2.95165e-05
ENSG00000103184.11|mRNA|SEC14L5|ENSG00000103184.11|ENSG00000103184.11|0|6477	0.725086	5.85474	8.94667	0.0030314	0.0104982
ENSG00000066294.14|mRNA|CD84|ENSG00000066294.14|ENSG00000066294.14|0|9255	0.724947	6.37345	13.3731	0.000305741	0.00185915
hsa_circ_0031551|circRNA|hsa_circ_0031551|hsa_circ_0031551|hsa_circ_0031551|0|600	0.724738	0.913161	9.05646	0.00286017	0.0100649
ENSG00000177119.15|mRNA|ANO6|ENSG00000177119.15|ENSG00000177119.15|0|8235	0.72463	10.5349	10.5528	0.00130396	0.00548464
hsa_circ_0052712|circRNA|hsa_circ_0052712|hsa_circ_0052712|hsa_circ_0052712|0|600	0.723856	1.16733	8.71712	0.00342413	0.0115245
ENSG00000229647.1|lncRNA|MYOSLID|ENSG00000229647.1|ENSG00000229647.1|0|1204	0.723852	3.28534	9.63337	0.00210969	0.00796928
hsa_circ_0008192|circRNA|hsa_circ_0008192|hsa_circ_0008192|hsa_circ_0008192|0|600	0.723751	1.48608	10.5902	0.00127885	0.00539938
ENSG00000253522.5|lncRNA|MIR3142HG|ENSG00000253522.5|ENSG00000253522.5|0|2301	0.723213	1.99903	9.09503	0.00280238	0.0099137
hsa_circ_0001686|circRNA|hsa_circ_0001686|hsa_circ_0001686|hsa_circ_0001686|0|600	0.722964	1.5866	11.137	0.000962709	0.00438384
ENSG00000138758.11|mRNA|SEPT11|ENSG00000138758.11|ENSG00000138758.11|0|9787	0.722153	9.21013	14.7918	0.000149206	0.00109168
ENSG00000266401.1|lncRNA|AP002478.1|ENSG00000266401.1|ENSG00000266401.1|0|1455	0.721775	4.92794	9.2383	0.00259798	0.0093831
hsa_circ_0066941|circRNA|hsa_circ_0066941|hsa_circ_0066941|hsa_circ_0066941|0|600	0.721516	0.937997	10.0793	0.00166971	0.00664053
hsa_circ_0008002|circRNA|hsa_circ_0008002|hsa_circ_0008002|hsa_circ_0008002|0|600	0.721273	4.84058	11.5292	0.000786036	0.00375276
ENSG00000148498.15|mRNA|PARD3|ENSG00000148498.15|ENSG00000148498.15|0|6513	0.721143	8.47984	12.4971	0.000477969	0.00259192
ENSG00000143622.10|mRNA|RIT1|ENSG00000143622.10|ENSG00000143622.10|0|3919	0.720842	7.83715	18.1446	2.81304e-05	0.000311355
ENSG00000152128.13|mRNA|TMEM163|ENSG00000152128.13|ENSG00000152128.13|0|6804	0.720561	2.50349	10.6891	0.00121469	0.00521108
hsa_circ_0007411|circRNA|hsa_circ_0007411|hsa_circ_0007411|hsa_circ_0007411|0|600	0.720545	4.74066	10.8874	0.00109574	0.00483612
ENSG00000115170.13|mRNA|ACVR1|ENSG00000115170.13|ENSG00000115170.13|0|3990	0.720486	6.93951	13.868	0.00023785	0.00154274
ENSG00000235513.1|lncRNA|AL035681.1|ENSG00000235513.1|ENSG00000235513.1|0|2500	0.720361	2.67947	8.89111	0.00312201	0.0107396
ENSG00000198626.15|mRNA|RYR2|ENSG00000198626.15|ENSG00000198626.15|0|17777	0.720135	4.79739	9.86042	0.00187255	0.00727182
hsa_circ_0042766|circRNA|hsa_circ_0042766|hsa_circ_0042766|hsa_circ_0042766|0|600	0.719731	2.17295	11.0352	0.00101484	0.00456185
hsa_circ_0003541|circRNA|hsa_circ_0003541|hsa_circ_0003541|hsa_circ_0003541|0|600	0.719685	1.19988	8.35647	0.00414933	0.0134152
ENSG00000234026.1|lncRNA|AL157834.2|ENSG00000234026.1|ENSG00000234026.1|0|663	0.719233	2.52777	10.3007	0.00148716	0.00607395
hsa_circ_0014585|circRNA|hsa_circ_0014585|hsa_circ_0014585|hsa_circ_0014585|0|600	0.718931	1.14989	10.246	0.00153032	0.00620119
hsa_circ_0004610|circRNA|hsa_circ_0004610|hsa_circ_0004610|hsa_circ_0004610|0|600	0.718796	1.19741	10.6892	0.00121458	0.00521108
ENSG00000206052.10|mRNA|DOK6|ENSG00000206052.10|ENSG00000206052.10|0|9387	0.718429	5.5631	11.7597	0.000697945	0.00344141
hsa_circ_0007923|circRNA|hsa_circ_0007923|hsa_circ_0007923|hsa_circ_0007923|0|600	0.718278	0.938988	10.159	0.00160152	0.00642315
hsa_circ_0031445|circRNA|hsa_circ_0031445|hsa_circ_0031445|hsa_circ_0031445|0|600	0.718171	3.08371	9.18166	0.0026769	0.00959635
hsa_circ_0011426|circRNA|hsa_circ_0011426|hsa_circ_0011426|hsa_circ_0011426|0|410	0.717982	1.14412	10.017	0.00172505	0.00681308
hsa_circ_0031465|circRNA|hsa_circ_0031465|hsa_circ_0031465|hsa_circ_0031465|0|600	0.717879	1.46781	11.6445	0.000740619	0.00359495
hsa_circ_0001578|circRNA|hsa_circ_0001578|hsa_circ_0001578|hsa_circ_0001578|0|600	0.717627	4.85726	16.3876	6.7142e-05	0.000600245
hsa_circ_0002207|circRNA|hsa_circ_0002207|hsa_circ_0002207|hsa_circ_0002207|0|600	0.717447	1.8633	11.0755	0.000993861	0.00449186
ENSG00000259456.3|lncRNA|ADNP-AS1|ENSG00000259456.3|ENSG00000259456.3|0|927	0.717421	2.83932	14.3145	0.000189786	0.00130527
hsa_circ_0029198|circRNA|hsa_circ_0029198|hsa_circ_0029198|hsa_circ_0029198|0|600	0.717309	1.08826	8.8629	0.00316907	0.0108566
ENSG00000259984.1|pseudogene|AL928711.1|ENSG00000259984.1|ENSG00000259984.1|0|459	0.717116	4.23451	10.7296	0.00118938	0.00513579
ENSG00000225205.5|lncRNA|AC078883.1|ENSG00000225205.5|ENSG00000225205.5|0|2447	0.71699	7.14905	11.9293	0.000639595	0.00322221
ENSG00000197147.13|mRNA|LRRC8B|ENSG00000197147.13|ENSG00000197147.13|0|8213	0.716962	5.66735	11.88	0.000656022	0.00328381
ENSG00000267023.5|pseudogene|LRRC37A16P|ENSG00000267023.5|ENSG00000267023.5|0|3815	0.716772	3.57484	7.61683	0.00617061	0.0181711
hsa_circ_0089282|circRNA|hsa_circ_0089282|hsa_circ_0089282|hsa_circ_0089282|0|600	0.716634	1.46234	9.93791	0.00179799	0.0070537
hsa_circ_0061395|circRNA|hsa_circ_0061395|hsa_circ_0061395|hsa_circ_0061395|0|600	0.716457	1.8505	11.6832	0.000726024	0.00354568
hsa_circ_0002990|circRNA|hsa_circ_0002990|hsa_circ_0002990|hsa_circ_0002990|0|600	0.716066	1.10832	8.76389	0.00334009	0.0112989
ENSG00000168116.13|mRNA|KIAA1586|ENSG00000168116.13|ENSG00000168116.13|0|3109	0.716057	5.62733	25.3941	8.47477e-07	2.25372e-05
ENSG00000137672.12|mRNA|TRPC6|ENSG00000137672.12|ENSG00000137672.12|0|5537	0.715906	4.5538	14.4528	0.000176988	0.00123991
ENSG00000255126.1|lncRNA|AP003064.1|ENSG00000255126.1|ENSG00000255126.1|0|590	0.71585	2.41255	6.99665	0.00863534	0.023545
hsa_circ_0006659|circRNA|hsa_circ_0006659|hsa_circ_0006659|hsa_circ_0006659|0|600	0.715823	2.77869	11.0108	0.0010278	0.00460457
ENSG00000267175.5|lncRNA|AC105094.2|ENSG00000267175.5|ENSG00000267175.5|0|1156	0.715736	7.40843	9.48263	0.00228386	0.00847946
hsa_circ_0082580|circRNA|hsa_circ_0082580|hsa_circ_0082580|hsa_circ_0082580|0|600	0.715149	3.53516	11.1593	0.000951656	0.00434343
hsa_circ_0030819|circRNA|hsa_circ_0030819|hsa_circ_0030819|hsa_circ_0030819|0|600	0.714582	1.64273	10.5922	0.00127748	0.00539475
hsa_circ_0012480|circRNA|hsa_circ_0012480|hsa_circ_0012480|hsa_circ_0012480|0|600	0.714523	4.57049	11.4631	0.000813312	0.00385584
ENSG00000181458.10|mRNA|TMEM45A|ENSG00000181458.10|ENSG00000181458.10|0|6005	0.714037	3.72777	11.0719	0.000995746	0.00449528
hsa_circ_0077084|circRNA|hsa_circ_0077084|hsa_circ_0077084|hsa_circ_0077084|0|600	0.713808	1.94939	11.695	0.000721618	0.00353146
ENSG00000255363.2|lncRNA|AP001189.5|ENSG00000255363.2|ENSG00000255363.2|0|1725	0.713772	3.2624	10.6734	0.00122465	0.00524092
ENSG00000228651.1|lncRNA|AC074327.1|ENSG00000228651.1|ENSG00000228651.1|0|650	0.713205	6.24516	9.57874	0.0021712	0.00814301
ENSG00000277481.1|mRNA|PKD1L3|ENSG00000277481.1|ENSG00000277481.1|0|5199	0.713153	3.15428	11.8571	0.000663821	0.00331163
hsa_circ_0031608|circRNA|hsa_circ_0031608|hsa_circ_0031608|hsa_circ_0031608|0|600	0.713079	1.88533	9.79837	0.00193451	0.00745151
ENSG00000251349.3|mRNA|MSANTD3-TMEFF1|ENSG00000251349.3|ENSG00000251349.3|0|2069	0.712432	7.83884	13.0461	0.000361102	0.00210924
hsa_circ_0003865|circRNA|hsa_circ_0003865|hsa_circ_0003865|hsa_circ_0003865|0|600	0.711848	3.27749	13.5788	0.000275413	0.00172036
ENSG00000166831.8|mRNA|RBPMS2|ENSG00000166831.8|ENSG00000166831.8|0|2101	0.71178	7.20939	11.4918	0.000801353	0.0038091
ENSG00000248408.1|lncRNA|LINC02469|ENSG00000248408.1|ENSG00000248408.1|0|741	0.711536	2.02546	9.7212	0.00201452	0.0076784
hsa_circ_0003548|circRNA|hsa_circ_0003548|hsa_circ_0003548|hsa_circ_0003548|0|600	0.711492	1.26913	10.8224	0.00113335	0.0049539
ENSG00000234810.2|lncRNA|AL603840.1|ENSG00000234810.2|ENSG00000234810.2|0|4913	0.711138	5.56655	10.5354	0.00131588	0.00552066
hsa_circ_0001487|circRNA|hsa_circ_0001487|hsa_circ_0001487|hsa_circ_0001487|0|600	0.711129	3.53148	11.1895	0.000936895	0.00429721
ENSG00000169224.12|mRNA|GCSAML|ENSG00000169224.12|ENSG00000169224.12|0|4680	0.711042	5.88337	9.60693	0.00213923	0.00806102
hsa_circ_0028347|circRNA|hsa_circ_0028347|hsa_circ_0028347|hsa_circ_0028347|0|380	0.71102	1.11051	9.75848	0.00197546	0.0075661
ENSG00000260916.7|mRNA|CCPG1|ENSG00000260916.7|ENSG00000260916.7|0|8790	0.710688	8.6048	13.1456	0.000343253	0.0020285
hsa_circ_0059118|circRNA|hsa_circ_0059118|hsa_circ_0059118|hsa_circ_0059118|0|600	0.710649	0.873544	8.23235	0.00443384	0.0141312
hsa_circ_0087265|circRNA|hsa_circ_0087265|hsa_circ_0087265|hsa_circ_0087265|0|600	0.71034	3.1956	11.7809	0.00069037	0.00341081
ENSG00000260077.1|lncRNA|AC104794.2|ENSG00000260077.1|ENSG00000260077.1|0|1572	0.71007	3.72512	11.9604	0.000629455	0.00318561
hsa_circ_0008777|circRNA|hsa_circ_0008777|hsa_circ_0008777|hsa_circ_0008777|0|600	0.709958	1.66086	10.9756	0.00104673	0.00467468
ENSG00000113638.13|mRNA|TTC33|ENSG00000113638.13|ENSG00000113638.13|0|6821	0.709329	7.72234	13.0494	0.000360485	0.00210723
hsa_circ_0000843|circRNA|hsa_circ_0000843|hsa_circ_0000843|hsa_circ_0000843|0|600	0.70927	1.82098	8.64228	0.00356312	0.0119099
hsa_circ_0084754|circRNA|hsa_circ_0084754|hsa_circ_0084754|hsa_circ_0084754|0|600	0.709074	1.40952	10.3374	0.00145897	0.00598095
ENSG00000281903.2|lncRNA|LINC02246|ENSG00000281903.2|ENSG00000281903.2|0|3635	0.708952	5.49125	11.7863	0.000688437	0.00340379
ENSG00000261771.5|lncRNA|DNAAF4-CCPG1|ENSG00000261771.5|ENSG00000261771.5|0|4589	0.708604	8.6072	13.5766	0.00027572	0.00172144
hsa_circ_0057034|circRNA|hsa_circ_0057034|hsa_circ_0057034|hsa_circ_0057034|0|600	0.708528	3.60023	11.9436	0.000634925	0.00320435
ENSG00000235423.8|lncRNA|AC068768.1|ENSG00000235423.8|ENSG00000235423.8|0|1756	0.708106	5.4441	8.75606	0.00335401	0.0113308
hsa_circ_0001770|circRNA|hsa_circ_0001770|hsa_circ_0001770|hsa_circ_0001770|0|456	0.708033	2.07612	11.9858	0.000621308	0.00315318
hsa_circ_0078762|circRNA|hsa_circ_0078762|hsa_circ_0078762|hsa_circ_0078762|0|600	0.707889	1.83724	9.98794	0.00175147	0.00690242
ENSG00000105507.2|mRNA|CABP5|ENSG00000105507.2|ENSG00000105507.2|0|1501	0.707629	6.62587	9.27667	0.00254587	0.00924055
hsa_circ_0087355|circRNA|hsa_circ_0087355|hsa_circ_0087355|hsa_circ_0087355|0|600	0.707068	1.87686	8.90364	0.00310133	0.0106833
hsa_circ_0007765|circRNA|hsa_circ_0007765|hsa_circ_0007765|hsa_circ_0007765|0|600	0.7069	4.42604	13.8749	0.000237022	0.00153854
ENSG00000184500.14|mRNA|PROS1|ENSG00000184500.14|ENSG00000184500.14|0|4429	0.706358	9.12886	9.11592	0.00277158	0.00983789
hsa_circ_0053861|circRNA|hsa_circ_0053861|hsa_circ_0053861|hsa_circ_0053861|0|600	0.706339	1.65223	7.84917	0.00544502	0.0165017
hsa_circ_0005829|circRNA|hsa_circ_0005829|hsa_circ_0005829|hsa_circ_0005829|0|600	0.706193	1.99922	11.1202	0.000971142	0.00440978
hsa_circ_0068376|circRNA|hsa_circ_0068376|hsa_circ_0068376|hsa_circ_0068376|0|600	0.706165	1.6189	10.028	0.00171509	0.00678315
ENSG00000235802.1|lncRNA|HCFC1-AS1|ENSG00000235802.1|ENSG00000235802.1|0|350	0.706165	2.37415	9.08747	0.0028136	0.00993863
hsa_circ_0006987|circRNA|hsa_circ_0006987|hsa_circ_0006987|hsa_circ_0006987|0|600	0.705966	2.32652	12.3034	0.000527818	0.00278722
hsa_circ_0088057|circRNA|hsa_circ_0088057|hsa_circ_0088057|hsa_circ_0088057|0|600	0.705596	1.72518	9.32163	0.00248617	0.0090623
ENSG00000240440.1|lncRNA|AC007879.4|ENSG00000240440.1|ENSG00000240440.1|0|361	0.705036	2.06412	10.7707	0.00116425	0.00505792
ENSG00000179855.5|mRNA|GIPC3|ENSG00000179855.5|ENSG00000179855.5|0|4335	0.705029	4.56021	12.5214	0.000472058	0.00257387
hsa_circ_0000836|circRNA|hsa_circ_0000836|hsa_circ_0000836|hsa_circ_0000836|0|600	0.704831	1.61171	10.6784	0.00122145	0.00523348
hsa_circ_0017429|circRNA|hsa_circ_0017429|hsa_circ_0017429|hsa_circ_0017429|0|402	0.704737	0.999904	9.43484	0.0023421	0.00864259
ENSG00000183019.7|mRNA|MCEMP1|ENSG00000183019.7|ENSG00000183019.7|0|1906	0.70457	4.29879	12.6514	0.000441684	0.00245045
ENSG00000236333.3|lncRNA|TRHDE-AS1|ENSG00000236333.3|ENSG00000236333.3|0|8781	0.704546	1.85459	9.44268	0.00233244	0.00861665
ENSG00000115290.9|mRNA|GRB14|ENSG00000115290.9|ENSG00000115290.9|0|2958	0.704473	7.00268	8.33244	0.00420291	0.0135533
hsa_circ_0015036|circRNA|hsa_circ_0015036|hsa_circ_0015036|hsa_circ_0015036|0|600	0.704327	1.27368	9.79655	0.00193636	0.00745431
hsa_circ_0008625|circRNA|hsa_circ_0008625|hsa_circ_0008625|hsa_circ_0008625|0|600	0.704256	2.1577	11.3948	0.000842504	0.00395382
ENSG00000244459.2|lncRNA|AC147067.1|ENSG00000244459.2|ENSG00000244459.2|0|579	0.704244	5.15732	12.9014	0.000388752	0.00223384
ENSG00000132970.12|mRNA|WASF3|ENSG00000132970.12|ENSG00000132970.12|0|5162	0.704212	7.39528	10.7269	0.00119101	0.00514058
ENSG00000138735.15|mRNA|PDE5A|ENSG00000138735.15|ENSG00000138735.15|0|9775	0.704178	10.6469	9.00478	0.00293949	0.0102705
hsa_circ_0078018|circRNA|hsa_circ_0078018|hsa_circ_0078018|hsa_circ_0078018|0|600	0.70401	1.41559	10.6934	0.00121196	0.00520513
ENSG00000123500.9|mRNA|COL10A1|ENSG00000123500.9|ENSG00000123500.9|0|3816	0.703807	2.5107	7.33318	0.007193	0.0205154
ENSG00000244041.7|lncRNA|LINC01011|ENSG00000244041.7|ENSG00000244041.7|0|2811	0.703803	7.27535	10.1606	0.0016001	0.00641876
hsa_circ_0036963|circRNA|hsa_circ_0036963|hsa_circ_0036963|hsa_circ_0036963|0|600	0.703576	1.0363	8.29402	0.00429007	0.013772
hsa_circ_0017105|circRNA|hsa_circ_0017105|hsa_circ_0017105|hsa_circ_0017105|0|600	0.703408	1.0297	7.76989	0.00568221	0.0170809
hsa_circ_0035294|circRNA|hsa_circ_0035294|hsa_circ_0035294|hsa_circ_0035294|0|600	0.702711	2.87256	8.21314	0.00447963	0.014243
hsa_circ_0079643|circRNA|hsa_circ_0079643|hsa_circ_0079643|hsa_circ_0079643|0|600	0.702692	1.71681	12.5054	0.000475928	0.00258648
ENSG00000267279.1|lncRNA|AC090409.1|ENSG00000267279.1|ENSG00000267279.1|0|1199	0.702204	7.86032	9.17676	0.00268384	0.00961065
ENSG00000168772.10|mRNA|CXXC4|ENSG00000168772.10|ENSG00000168772.10|0|5819	0.702091	2.52329	10.6513	0.0012388	0.00528513
ENSG00000104763.18|mRNA|ASAH1|ENSG00000104763.18|ENSG00000104763.18|0|15378	0.70203	9.66799	13.2777	0.000320932	0.00192917
hsa_circ_0086735|circRNA|hsa_circ_0086735|hsa_circ_0086735|hsa_circ_0086735|0|600	0.701797	5.18123	13.5812	0.000275071	0.00171984
ENSG00000065833.8|mRNA|ME1|ENSG00000065833.8|ENSG00000065833.8|0|3371	0.701625	4.71799	9.88435	0.0018492	0.00720528
ENSG00000255028.5|lncRNA|AP003049.2|ENSG00000255028.5|ENSG00000255028.5|0|1091	0.70155	4.52129	8.86526	0.00316512	0.0108449
hsa_circ_0023903|circRNA|hsa_circ_0023903|hsa_circ_0023903|hsa_circ_0023903|0|600	0.701203	0.912655	8.2697	0.00434618	0.0139185
ENSG00000167210.16|mRNA|LOXHD1|ENSG00000167210.16|ENSG00000167210.16|0|9020	0.70103	5.78262	11.6103	0.000753815	0.00363599
ENSG00000267009.6|lncRNA|AC007780.1|ENSG00000267009.6|ENSG00000267009.6|0|1863	0.700892	10.3451	25.0029	1.02053e-06	2.58963e-05
ENSG00000153347.9|mRNA|FAM81B|ENSG00000153347.9|ENSG00000153347.9|0|2495	0.700859	6.46795	9.12858	0.00275308	0.00978093
ENSG00000167100.14|mRNA|SAMD14|ENSG00000167100.14|ENSG00000167100.14|0|7016	0.700815	6.03176	8.49939	0.00384478	0.0126458
ENSG00000134297.6|pseudogene|PLEKHA8P1|ENSG00000134297.6|ENSG00000134297.6|0|2320	0.700594	6.66949	11.1199	0.00097128	0.00440978
hsa_circ_0083092|circRNA|hsa_circ_0083092|hsa_circ_0083092|hsa_circ_0083092|0|600	0.700304	4.98836	18.1236	2.84234e-05	0.000313901
ENSG00000104381.12|mRNA|GDAP1|ENSG00000104381.12|ENSG00000104381.12|0|4052	0.700196	3.69802	14.9608	0.000137055	0.00102227
ENSG00000169756.16|mRNA|LIMS1|ENSG00000169756.16|ENSG00000169756.16|0|7771	0.700007	10.8281	12.0111	0.000613256	0.00312025
ENSG00000284649.1|pseudogene|AC009093.8|ENSG00000284649.1|ENSG00000284649.1|0|769	0.699987	3.07339	11.925	0.000641034	0.00322376
hsa_circ_0005134|circRNA|hsa_circ_0005134|hsa_circ_0005134|hsa_circ_0005134|0|600	0.699898	1.03458	9.06206	0.0028517	0.0100525
hsa_circ_0015154|circRNA|hsa_circ_0015154|hsa_circ_0015154|hsa_circ_0015154|0|600	0.699684	1.9555	9.6261	0.00211777	0.00799071
hsa_circ_0084549|circRNA|hsa_circ_0084549|hsa_circ_0084549|hsa_circ_0084549|0|600	0.699441	2.00384	9.16105	0.00270622	0.00966439
hsa_circ_0010467|circRNA|hsa_circ_0010467|hsa_circ_0010467|hsa_circ_0010467|0|600	0.699206	1.03734	7.98459	0.00506307	0.015609
ENSG00000264006.6|pseudogene|AKR1C8P|ENSG00000264006.6|ENSG00000264006.6|0|2222	0.699199	1.84966	8.54921	0.00374408	0.0123717
ENSG00000146376.10|mRNA|ARHGAP18|ENSG00000146376.10|ENSG00000146376.10|0|4640	0.698904	9.76999	12.3077	0.00052667	0.00278356
hsa_circ_0077985|circRNA|hsa_circ_0077985|hsa_circ_0077985|hsa_circ_0077985|0|600	0.698773	1.32877	7.61056	0.00619154	0.0182273
hsa_circ_0042859|circRNA|hsa_circ_0042859|hsa_circ_0042859|hsa_circ_0042859|0|600	0.698728	1.16883	8.98505	0.00297038	0.0103462
ENSG00000128595.16|mRNA|CALU|ENSG00000128595.16|ENSG00000128595.16|0|4537	0.698656	7.19357	17.5981	3.68365e-05	0.000381894
hsa_circ_0005711|circRNA|hsa_circ_0005711|hsa_circ_0005711|hsa_circ_0005711|0|600	0.698423	0.941284	7.64306	0.00608397	0.0180117
hsa_circ_0035034|circRNA|hsa_circ_0035034|hsa_circ_0035034|hsa_circ_0035034|0|600	0.698231	1.74834	11.9318	0.000638787	0.00321895
hsa_circ_0077983|circRNA|hsa_circ_0077983|hsa_circ_0077983|hsa_circ_0077983|0|600	0.698137	3.98194	9.26572	0.00256064	0.00927569
ENSG00000248242.1|lncRNA|AC004053.1|ENSG00000248242.1|ENSG00000248242.1|0|575	0.69789	5.81886	9.838	0.00189471	0.0073407
ENSG00000117155.16|mRNA|SSX2IP|ENSG00000117155.16|ENSG00000117155.16|0|8639	0.697599	9.59303	11.2206	0.000921928	0.00424466
hsa_circ_0004264|circRNA|hsa_circ_0004264|hsa_circ_0004264|hsa_circ_0004264|0|600	0.696957	1.11747	8.3904	0.00407487	0.0132375
hsa_circ_0079855|circRNA|hsa_circ_0079855|hsa_circ_0079855|hsa_circ_0079855|0|600	0.696642	1.26845	6.19589	0.0133955	0.0331794
ENSG00000163590.13|mRNA|PPM1L|ENSG00000163590.13|ENSG00000163590.13|0|12447	0.696488	5.17055	10.8786	0.00110078	0.00484714
hsa_circ_0028075|circRNA|hsa_circ_0028075|hsa_circ_0028075|hsa_circ_0028075|0|600	0.696144	1.08204	7.49352	0.00775069	0.0217331
hsa_circ_0002138|circRNA|hsa_circ_0002138|hsa_circ_0002138|hsa_circ_0002138|0|600	0.695702	1.84357	13.2588	0.000324041	0.00194318
hsa_circ_0067047|circRNA|hsa_circ_0067047|hsa_circ_0067047|hsa_circ_0067047|0|600	0.695636	1.77373	9.44599	0.00232838	0.00860949
ENSG00000107669.17|mRNA|ATE1|ENSG00000107669.17|ENSG00000107669.17|0|5720	0.694945	7.77243	16.6832	5.79626e-05	0.000537704
ENSG00000258782.3|lncRNA|AL121694.1|ENSG00000258782.3|ENSG00000258782.3|0|671	0.694944	6.90659	8.60739	0.00362988	0.0120703
ENSG00000085733.15|mRNA|CTTN|ENSG00000085733.15|ENSG00000085733.15|0|6949	0.694873	10.5589	11.3747	0.000851322	0.00398396
hsa_circ_0067871|circRNA|hsa_circ_0067871|hsa_circ_0067871|hsa_circ_0067871|0|600	0.694742	3.4832	9.22107	0.00262174	0.00944385
ENSG00000124491.15|mRNA|F13A1|ENSG00000124491.15|ENSG00000124491.15|0|4690	0.694696	12.4251	10.6032	0.00127019	0.00537778
ENSG00000237803.5|lncRNA|LINC00211|ENSG00000237803.5|ENSG00000237803.5|0|2595	0.694662	6.41774	10.2373	0.00153729	0.00622562
hsa_circ_0081861|circRNA|hsa_circ_0081861|hsa_circ_0081861|hsa_circ_0081861|0|600	0.694508	1.00053	9.32322	0.00248409	0.00905929
hsa_circ_0007442|circRNA|hsa_circ_0007442|hsa_circ_0007442|hsa_circ_0007442|0|600	0.694192	1.57356	10.0421	0.00170247	0.00675067
hsa_circ_0086445|circRNA|hsa_circ_0086445|hsa_circ_0086445|hsa_circ_0086445|0|600	0.693531	1.25912	10.0223	0.00172024	0.00680081
hsa_circ_0026149|circRNA|hsa_circ_0026149|hsa_circ_0026149|hsa_circ_0026149|0|600	0.693496	1.58377	9.33568	0.00246782	0.00901494
hsa_circ_0005212|circRNA|hsa_circ_0005212|hsa_circ_0005212|hsa_circ_0005212|0|600	0.693049	1.31201	9.70992	0.00202649	0.00770902
hsa_circ_0045128|circRNA|hsa_circ_0045128|hsa_circ_0045128|hsa_circ_0045128|0|600	0.692331	1.81382	9.92429	0.00181088	0.00709168
hsa_circ_0002793|circRNA|hsa_circ_0002793|hsa_circ_0002793|hsa_circ_0002793|0|600	0.692057	2.779	12.9591	0.000377468	0.00218157
hsa_circ_0002832|circRNA|hsa_circ_0002832|hsa_circ_0002832|hsa_circ_0002832|0|600	0.691901	2.36619	10.5195	0.0013268	0.00554682
ENSG00000118855.18|mRNA|MFSD1|ENSG00000118855.18|ENSG00000118855.18|0|5288	0.691886	9.25746	11.122	0.000970223	0.00440707
ENSG00000107863.17|mRNA|ARHGAP21|ENSG00000107863.17|ENSG00000107863.17|0|10937	0.691772	9.00686	12.8711	0.000394813	0.00225891
ENSG00000187231.13|mRNA|SESTD1|ENSG00000187231.13|ENSG00000187231.13|0|11349	0.691538	7.5961	17.3736	4.11594e-05	0.000415027
ENSG00000108946.14|mRNA|PRKAR1A|ENSG00000108946.14|ENSG00000108946.14|0|6821	0.691349	10.6687	24.4844	1.30613e-06	3.07929e-05
hsa_circ_0004441|circRNA|hsa_circ_0004441|hsa_circ_0004441|hsa_circ_0004441|0|600	0.690857	1.7925	12.0302	0.000607288	0.00309542
hsa_circ_0091096|circRNA|hsa_circ_0091096|hsa_circ_0091096|hsa_circ_0091096|0|600	0.69048	1.13119	9.16003	0.00270768	0.00966787
ENSG00000184178.15|mRNA|SCFD2|ENSG00000184178.15|ENSG00000184178.15|0|3185	0.690465	8.07945	10.3705	0.00143398	0.00589339
ENSG00000128791.11|mRNA|TWSG1|ENSG00000128791.11|ENSG00000128791.11|0|4435	0.690334	5.63272	11.5397	0.00078177	0.00373829
hsa_circ_0001736|circRNA|hsa_circ_0001736|hsa_circ_0001736|hsa_circ_0001736|0|600	0.69017	4.7384	12.7317	0.000423928	0.00238042
ENSG00000172572.6|mRNA|PDE3A|ENSG00000172572.6|ENSG00000172572.6|0|8398	0.689791	6.76766	10.0622	0.00168463	0.00668922
hsa_circ_0003746|circRNA|hsa_circ_0003746|hsa_circ_0003746|hsa_circ_0003746|0|600	0.689625	4.1291	11.5183	0.00079046	0.0037672
hsa_circ_0001936|circRNA|hsa_circ_0001936|hsa_circ_0001936|hsa_circ_0001936|0|600	0.689336	3.37589	11.9507	0.000632602	0.00319829
ENSG00000061918.12|mRNA|GUCY1B3|ENSG00000061918.12|ENSG00000061918.12|0|3724	0.688851	9.42548	11.264	0.00090147	0.00416585
ENSG00000198718.12|mRNA|TOGARAM1|ENSG00000198718.12|ENSG00000198718.12|0|10274	0.688822	6.19019	22.0859	4.12347e-06	7.41592e-05
hsa_circ_0004657|circRNA|hsa_circ_0004657|hsa_circ_0004657|hsa_circ_0004657|0|600	0.688802	1.90479	10.017	0.00172504	0.00681308
hsa_circ_0054618|circRNA|hsa_circ_0054618|hsa_circ_0054618|hsa_circ_0054618|0|600	0.688413	2.79013	7.88114	0.00535226	0.0162907
ENSG00000234231.3|pseudogene|AC093616.1|ENSG00000234231.3|ENSG00000234231.3|0|2095	0.688402	5.32799	16.0188	8.06896e-05	0.000690629
hsa_circ_0017252|circRNA|hsa_circ_0017252|hsa_circ_0017252|hsa_circ_0017252|0|600	0.688321	3.34074	16.1595	7.52209e-05	0.000655145
hsa_circ_0072732|circRNA|hsa_circ_0072732|hsa_circ_0072732|hsa_circ_0072732|0|600	0.688311	4.98835	13.2253	0.000329605	0.00196939
hsa_circ_0017078|circRNA|hsa_circ_0017078|hsa_circ_0017078|hsa_circ_0017078|0|600	0.687735	1.18441	7.9598	0.00513087	0.0157584
ENSG00000144746.6|mRNA|ARL6IP5|ENSG00000144746.6|ENSG00000144746.6|0|2522	0.687702	7.66409	12.8097	0.000407386	0.00230803
hsa_circ_0005059|circRNA|hsa_circ_0005059|hsa_circ_0005059|hsa_circ_0005059|0|600	0.687653	1.40051	11.3472	0.000863489	0.00402955
ENSG00000111554.14|mRNA|MDM1|ENSG00000111554.14|ENSG00000111554.14|0|6549	0.687476	7.41142	14.8154	0.00014745	0.00108282
ENSG00000116678.19|mRNA|LEPR|ENSG00000116678.19|ENSG00000116678.19|0|11370	0.687336	8.53712	10.6957	0.00121054	0.00520014
hsa_circ_0004367|circRNA|hsa_circ_0004367|hsa_circ_0004367|hsa_circ_0004367|0|600	0.687251	3.06764	10.0598	0.00168683	0.00669529
hsa_circ_0063707|circRNA|hsa_circ_0063707|hsa_circ_0063707|hsa_circ_0063707|0|528	0.687165	2.18354	7.99162	0.00504402	0.0155703
hsa_circ_0007496|circRNA|hsa_circ_0007496|hsa_circ_0007496|hsa_circ_0007496|0|600	0.686893	1.64865	9.90103	0.00183309	0.0071548
hsa_circ_0000041|circRNA|hsa_circ_0000041|hsa_circ_0000041|hsa_circ_0000041|0|600	0.686557	1.33113	9.2489	0.00258348	0.00933977
hsa_circ_0005684|circRNA|hsa_circ_0005684|hsa_circ_0005684|hsa_circ_0005684|0|600	0.686521	2.05499	10.1966	0.00157027	0.00633219
hsa_circ_0023900|circRNA|hsa_circ_0023900|hsa_circ_0023900|hsa_circ_0023900|0|526	0.686472	1.01929	8.46171	0.00392277	0.0128515
hsa_circ_0065243|circRNA|hsa_circ_0065243|hsa_circ_0065243|hsa_circ_0065243|0|600	0.685901	3.39654	16.9564	5.06114e-05	0.00048531
ENSG00000124116.18|mRNA|WFDC3|ENSG00000124116.18|ENSG00000124116.18|0|2405	0.685889	2.50291	8.62064	0.00360439	0.0120136
hsa_circ_0079330|circRNA|hsa_circ_0079330|hsa_circ_0079330|hsa_circ_0079330|0|318	0.685874	1.1559	8.03527	0.00492731	0.0152886
ENSG00000234684.6|lncRNA|SDCBP2-AS1|ENSG00000234684.6|ENSG00000234684.6|0|4058	0.685839	3.14159	10.0312	0.00171224	0.00677322
ENSG00000144677.14|mRNA|CTDSPL|ENSG00000144677.14|ENSG00000144677.14|0|5796	0.685665	6.32128	10.7947	0.00114981	0.00500612
hsa_circ_0020545|circRNA|hsa_circ_0020545|hsa_circ_0020545|hsa_circ_0020545|0|600	0.685524	2.05089	7.70823	0.00587399	0.017507
ENSG00000081377.16|mRNA|CDC14B|ENSG00000081377.16|ENSG00000081377.16|0|10462	0.685512	8.45693	10.7171	0.00119709	0.00515679
hsa_circ_0005277|circRNA|hsa_circ_0005277|hsa_circ_0005277|hsa_circ_0005277|0|600	0.685335	1.09287	9.19124	0.00266338	0.00956412
hsa_circ_0079433|circRNA|hsa_circ_0079433|hsa_circ_0079433|hsa_circ_0079433|0|600	0.685223	1.28551	8.34568	0.00417329	0.0134796
hsa_circ_0006373|circRNA|hsa_circ_0006373|hsa_circ_0006373|hsa_circ_0006373|0|600	0.684942	2.15584	9.71777	0.00201815	0.00768764
hsa_circ_0061747|circRNA|hsa_circ_0061747|hsa_circ_0061747|hsa_circ_0061747|0|600	0.684849	1.53465	5.80779	0.0166113	0.0391855
ENSG00000227811.2|lncRNA|FAM212B-AS1|ENSG00000227811.2|ENSG00000227811.2|0|2131	0.684709	4.94592	9.96091	0.00177645	0.00697878
ENSG00000241697.4|mRNA|TMEFF1|ENSG00000241697.4|ENSG00000241697.4|0|2611	0.684521	7.24756	11.4317	0.000826606	0.00390217
hsa_circ_0021156|circRNA|hsa_circ_0021156|hsa_circ_0021156|hsa_circ_0021156|0|600	0.684423	1.76024	9.33564	0.00246786	0.00901494
hsa_circ_0079798|circRNA|hsa_circ_0079798|hsa_circ_0079798|hsa_circ_0079798|0|600	0.684401	2.76575	11.3866	0.000846104	0.0039655
hsa_circ_0083172|circRNA|hsa_circ_0083172|hsa_circ_0083172|hsa_circ_0083172|0|600	0.684288	3.97876	12.9593	0.000377441	0.00218157
ENSG00000258422.5|lncRNA|AL160191.1|ENSG00000258422.5|ENSG00000258422.5|0|1109	0.682969	3.34641	11.0347	0.00101512	0.00456209
hsa_circ_0072379|circRNA|hsa_circ_0072379|hsa_circ_0072379|hsa_circ_0072379|0|600	0.682742	1.98193	8.7348	0.0033921	0.011436
hsa_circ_0007367|circRNA|hsa_circ_0007367|hsa_circ_0007367|hsa_circ_0007367|0|600	0.682584	3.5534	11.1161	0.000973201	0.00441549
ENSG00000152256.13|mRNA|PDK1|ENSG00000152256.13|ENSG00000152256.13|0|14883	0.682576	6.77101	13.7233	0.000255937	0.00162932
ENSG00000158164.6|mRNA|TMSB15A|ENSG00000158164.6|ENSG00000158164.6|0|685	0.682561	3.39015	9.17502	0.00268631	0.00961567
hsa_circ_0018761|circRNA|hsa_circ_0018761|hsa_circ_0018761|hsa_circ_0018761|0|600	0.682155	2.71505	10.2648	0.00151532	0.00615728
ENSG00000154229.11|mRNA|PRKCA|ENSG00000154229.11|ENSG00000154229.11|0|11152	0.681819	6.96467	15.485	0.000105364	0.000839254
hsa_circ_0044251|circRNA|hsa_circ_0044251|hsa_circ_0044251|hsa_circ_0044251|0|600	0.681312	1.06368	8.95185	0.00302308	0.0104843
ENSG00000117400.16|mRNA|MPL|ENSG00000117400.16|ENSG00000117400.16|0|2086	0.681232	7.9268	8.37981	0.00409794	0.0132796
ENSG00000140022.9|mRNA|STON2|ENSG00000140022.9|ENSG00000140022.9|0|6675	0.681185	8.57126	10.5704	0.00129208	0.005446
hsa_circ_0070680|circRNA|hsa_circ_0070680|hsa_circ_0070680|hsa_circ_0070680|0|600	0.681169	1.94024	10.5524	0.00130422	0.00548464
hsa_circ_0070468|circRNA|hsa_circ_0070468|hsa_circ_0070468|hsa_circ_0070468|0|600	0.681033	1.56715	8.99033	0.00296208	0.0103284
hsa_circ_0059169|circRNA|hsa_circ_0059169|hsa_circ_0059169|hsa_circ_0059169|0|600	0.680985	1.03118	8.70293	0.00345005	0.0115941
ENSG00000051382.8|mRNA|PIK3CB|ENSG00000051382.8|ENSG00000051382.8|0|7850	0.680965	8.05107	14.1624	0.000204939	0.00138138
hsa_circ_0005965|circRNA|hsa_circ_0005965|hsa_circ_0005965|hsa_circ_0005965|0|600	0.680816	2.39263	11.0705	0.000996441	0.0044974
ENSG00000109171.14|mRNA|SLAIN2|ENSG00000109171.14|ENSG00000109171.14|0|6524	0.680792	9.44551	15.2138	0.000120707	0.000931334
hsa_circ_0000027|circRNA|hsa_circ_0000027|hsa_circ_0000027|hsa_circ_0000027|0|600	0.680761	2.67329	11.5299	0.000785737	0.00375276
hsa_circ_0086729|circRNA|hsa_circ_0086729|hsa_circ_0086729|hsa_circ_0086729|0|600	0.680546	4.51612	13.3551	0.000308547	0.00187222
hsa_circ_0001818|circRNA|hsa_circ_0001818|hsa_circ_0001818|hsa_circ_0001818|0|488	0.680523	3.07365	13.6468	0.000266063	0.00167402
ENSG00000005020.12|mRNA|SKAP2|ENSG00000005020.12|ENSG00000005020.12|0|5520	0.68042	9.90926	14.0527	0.000216621	0.00143481
hsa_circ_0002738|circRNA|hsa_circ_0002738|hsa_circ_0002738|hsa_circ_0002738|0|600	0.680281	4.62743	15.8047	8.97922e-05	0.000748706
hsa_circ_0010523|circRNA|hsa_circ_0010523|hsa_circ_0010523|hsa_circ_0010523|0|600	0.680188	1.01527	7.95381	0.00514739	0.0157907
ENSG00000134291.11|mRNA|TMEM106C|ENSG00000134291.11|ENSG00000134291.11|0|3475	0.679968	6.9919	14.6195	0.000162729	0.00116791
hsa_circ_0013252|circRNA|hsa_circ_0013252|hsa_circ_0013252|hsa_circ_0013252|0|600	0.679681	2.80074	10.7907	0.00115218	0.00501315
ENSG00000065534.18|mRNA|MYLK|ENSG00000065534.18|ENSG00000065534.18|0|22167	0.679647	9.56088	11.2184	0.000922979	0.00424754
ENSG00000164120.13|mRNA|HPGD|ENSG00000164120.13|ENSG00000164120.13|0|5529	0.679597	5.68163	16.4717	6.43884e-05	0.000581098
ENSG00000251259.1|lncRNA|AC004069.1|ENSG00000251259.1|ENSG00000251259.1|0|549	0.679585	3.33001	10.1895	0.00157616	0.00634824
ENSG00000129682.15|mRNA|FGF13|ENSG00000129682.15|ENSG00000129682.15|0|20681	0.679301	2.7466	9.33852	0.00246412	0.00900621
ENSG00000189403.14|mRNA|HMGB1|ENSG00000189403.14|ENSG00000189403.14|0|7723	0.679137	11.0363	22.0474	4.20073e-06	7.53449e-05
ENSG00000150637.8|mRNA|CD226|ENSG00000150637.8|ENSG00000150637.8|0|13638	0.67904	10.4182	10.0965	0.00165472	0.00660067
ENSG00000267316.5|lncRNA|AC090409.2|ENSG00000267316.5|ENSG00000267316.5|0|610	0.678833	6.80653	8.50421	0.00383492	0.0126196
hsa_circ_0002114|circRNA|hsa_circ_0002114|hsa_circ_0002114|hsa_circ_0002114|0|600	0.678324	1.57596	8.45369	0.00393958	0.0128896
hsa_circ_0069863|circRNA|hsa_circ_0069863|hsa_circ_0069863|hsa_circ_0069863|0|600	0.678319	0.831069	6.4279	0.0117877	0.0301109
ENSG00000248516.1|lncRNA|AC105415.1|ENSG00000248516.1|ENSG00000248516.1|0|1416	0.678124	3.31359	9.4466	0.00232763	0.00860831
hsa_circ_0069779|circRNA|hsa_circ_0069779|hsa_circ_0069779|hsa_circ_0069779|0|600	0.67793	3.40463	8.55313	0.00373627	0.012352
hsa_circ_0013012|circRNA|hsa_circ_0013012|hsa_circ_0013012|hsa_circ_0013012|0|600	0.67779	1.28284	9.06121	0.00285298	0.0100535
ENSG00000147862.15|mRNA|NFIB|ENSG00000147862.15|ENSG00000147862.15|0|12765	0.677733	6.49202	17.8677	3.22448e-05	0.000344838
hsa_circ_0086734|circRNA|hsa_circ_0086734|hsa_circ_0086734|hsa_circ_0086734|0|600	0.677731	5.37421	13.6395	0.000267055	0.00167945
hsa_circ_0031444|circRNA|hsa_circ_0031444|hsa_circ_0031444|hsa_circ_0031444|0|544	0.677687	2.37987	8.77727	0.00331644	0.0112346
ENSG00000269955.2|mRNA|C7orf55-LUC7L2|ENSG00000269955.2|ENSG00000269955.2|0|1661	0.677615	9.64119	19.2277	1.65279e-05	0.000209968
ENSG00000241525.4|lncRNA|AC141424.1|ENSG00000241525.4|ENSG00000241525.4|0|1323	0.677567	4.69057	10.7996	0.00114685	0.00499647
hsa_circ_0023339|circRNA|hsa_circ_0023339|hsa_circ_0023339|hsa_circ_0023339|0|444	0.677481	2.68201	9.25415	0.00257632	0.00932234
hsa_circ_0046849|circRNA|hsa_circ_0046849|hsa_circ_0046849|hsa_circ_0046849|0|600	0.677266	3.06425	11.179	0.000942018	0.00431425
hsa_circ_0029855|circRNA|hsa_circ_0029855|hsa_circ_0029855|hsa_circ_0029855|0|326	0.676965	2.73232	6.95949	0.00881191	0.0239283
hsa_circ_0011168|circRNA|hsa_circ_0011168|hsa_circ_0011168|hsa_circ_0011168|0|600	0.676721	1.65779	9.93075	0.00180476	0.0070733
ENSG00000172927.7|mRNA|MYEOV|ENSG00000172927.7|ENSG00000172927.7|0|3760	0.676481	5.73309	9.0784	0.00282714	0.00998181
hsa_circ_0088061|circRNA|hsa_circ_0088061|hsa_circ_0088061|hsa_circ_0088061|0|600	0.676254	2.03141	8.64081	0.00356591	0.0119172
ENSG00000082781.11|mRNA|ITGB5|ENSG00000082781.11|ENSG00000082781.11|0|6447	0.676096	8.32841	8.13278	0.00467646	0.0147186
hsa_circ_0042438|circRNA|hsa_circ_0042438|hsa_circ_0042438|hsa_circ_0042438|0|354	0.676036	0.943428	8.13563	0.00466934	0.0147001
ENSG00000187098.14|mRNA|MITF|ENSG00000187098.14|ENSG00000187098.14|0|7193	0.675466	6.06192	10.2561	0.00152221	0.00617383
ENSG00000146963.17|mRNA|LUC7L2|ENSG00000146963.17|ENSG00000146963.17|0|6316	0.675435	9.67479	19.0623	1.7923e-05	0.000222586
hsa_circ_0003874|circRNA|hsa_circ_0003874|hsa_circ_0003874|hsa_circ_0003874|0|600	0.675027	2.59842	10.3267	0.00146713	0.00600736
ENSG00000108061.11|mRNA|SHOC2|ENSG00000108061.11|ENSG00000108061.11|0|4429	0.674904	8.19517	20.0581	1.10181e-05	0.000156484
ENSG00000122786.19|mRNA|CALD1|ENSG00000122786.19|ENSG00000122786.19|0|9843	0.674757	9.48222	17.0761	4.7694e-05	0.000465162
hsa_circ_0047869|circRNA|hsa_circ_0047869|hsa_circ_0047869|hsa_circ_0047869|0|600	0.674757	1.44672	8.84518	0.00319902	0.0109366
hsa_circ_0001614|circRNA|hsa_circ_0001614|hsa_circ_0001614|hsa_circ_0001614|0|600	0.674599	2.58597	11.663	0.000733612	0.00357571
ENSG00000283633.1|lncRNA|AP000547.3|ENSG00000283633.1|ENSG00000283633.1|0|3071	0.674335	8.85864	9.2374	0.00259922	0.00938477
ENSG00000154310.16|mRNA|TNIK|ENSG00000154310.16|ENSG00000154310.16|0|8523	0.673901	8.54441	16.6795	5.80687e-05	0.000538244
hsa_circ_0007951|circRNA|hsa_circ_0007951|hsa_circ_0007951|hsa_circ_0007951|0|600	0.673352	1.63422	8.92862	0.00306054	0.010583
ENSG00000133393.12|mRNA|FOPNL|ENSG00000133393.12|ENSG00000133393.12|0|2391	0.673206	5.57595	19.6778	1.32638e-05	0.000178386
ENSG00000078618.21|mRNA|NRDC|ENSG00000078618.21|ENSG00000078618.21|0|6773	0.673016	9.31301	20.6775	8.15143e-06	0.000124966
hsa_circ_0081311|circRNA|hsa_circ_0081311|hsa_circ_0081311|hsa_circ_0081311|0|600	0.673003	1.59302	7.93383	0.00520292	0.015916
ENSG00000148229.12|mRNA|POLE3|ENSG00000148229.12|ENSG00000148229.12|0|2604	0.672567	7.81186	27.9664	2.51844e-07	8.75092e-06
ENSG00000114487.9|mRNA|MORC1|ENSG00000114487.9|ENSG00000114487.9|0|3764	0.67239	7.63117	8.8572	0.00317868	0.0108839
hsa_circ_0008140|circRNA|hsa_circ_0008140|hsa_circ_0008140|hsa_circ_0008140|0|600	0.671833	0.980449	7.57915	0.00629734	0.0184842
hsa_circ_0070930|circRNA|hsa_circ_0070930|hsa_circ_0070930|hsa_circ_0070930|0|600	0.671819	1.23749	6.15411	0.0137083	0.033792
hsa_circ_0035940|circRNA|hsa_circ_0035940|hsa_circ_0035940|hsa_circ_0035940|0|600	0.671806	1.31791	9.44374	0.00233114	0.00861489
ENSG00000064652.10|mRNA|SNX24|ENSG00000064652.10|ENSG00000064652.10|0|3550	0.671254	5.25169	16.463	6.46696e-05	0.000582914
hsa_circ_0044241|circRNA|hsa_circ_0044241|hsa_circ_0044241|hsa_circ_0044241|0|600	0.671248	3.95117	9.83929	0.00189342	0.00733857
ENSG00000249242.7|mRNA|TMEM150C|ENSG00000249242.7|ENSG00000249242.7|0|3671	0.671011	1.8146	9.90413	0.00183011	0.00714953
hsa_circ_0008747|circRNA|hsa_circ_0008747|hsa_circ_0008747|hsa_circ_0008747|0|600	0.670956	2.19774	8.88231	0.00313662	0.0107715
hsa_circ_0008506|circRNA|hsa_circ_0008506|hsa_circ_0008506|hsa_circ_0008506|0|600	0.670805	1.64878	8.15695	0.00461634	0.0145723
hsa_circ_0003889|circRNA|hsa_circ_0003889|hsa_circ_0003889|hsa_circ_0003889|0|600	0.670682	1.40451	9.41205	0.0023704	0.00873085
ENSG00000152760.9|mRNA|TCTEX1D1|ENSG00000152760.9|ENSG00000152760.9|0|3100	0.670654	2.82468	10.0049	0.001736	0.00685226
ENSG00000280279.1|lncRNA|AC240565.2|ENSG00000280279.1|ENSG00000280279.1|0|2096	0.670623	2.03516	10.2961	0.00149077	0.00608669
hsa_circ_0084942|circRNA|hsa_circ_0084942|hsa_circ_0084942|hsa_circ_0084942|0|600	0.670601	1.0946	7.48261	0.00663436	0.0192777
hsa_circ_0005429|circRNA|hsa_circ_0005429|hsa_circ_0005429|hsa_circ_0005429|0|600	0.670589	2.87456	10.6032	0.00127023	0.00537778
ENSG00000099256.18|mRNA|PRTFDC1|ENSG00000099256.18|ENSG00000099256.18|0|2329	0.670452	5.66007	10.1836	0.00158105	0.00636408
hsa_circ_0007449|circRNA|hsa_circ_0007449|hsa_circ_0007449|hsa_circ_0007449|0|600	0.6702	1.85317	8.70339	0.00344921	0.0115933
ENSG00000067365.14|mRNA|METTL22|ENSG00000067365.14|ENSG00000067365.14|0|8254	0.670107	5.66792	12.5988	0.000453735	0.00250131
ENSG00000177125.5|mRNA|ZBTB34|ENSG00000177125.5|ENSG00000177125.5|0|6606	0.670003	4.65017	12.2171	0.000551719	0.00287913
ENSG00000259207.7|mRNA|ITGB3|ENSG00000259207.7|ENSG00000259207.7|0|4394	0.669969	11.5275	7.48342	0.00663144	0.0192749
hsa_circ_0070803|circRNA|hsa_circ_0070803|hsa_circ_0070803|hsa_circ_0070803|0|600	0.669954	2.73193	10.0711	0.00167687	0.00666504
ENSG00000197959.13|mRNA|DNM3|ENSG00000197959.13|ENSG00000197959.13|0|11329	0.669929	10.1949	9.3545	0.00244344	0.00894713
hsa_circ_0029929|circRNA|hsa_circ_0029929|hsa_circ_0029929|hsa_circ_0029929|0|600	0.669907	1.12928	8.87444	0.00314974	0.0108015
hsa_circ_0087749|circRNA|hsa_circ_0087749|hsa_circ_0087749|hsa_circ_0087749|0|600	0.66988	1.36054	8.96648	0.00299975	0.0104252
hsa_circ_0006961|circRNA|hsa_circ_0006961|hsa_circ_0006961|hsa_circ_0006961|0|600	0.669792	1.62546	10.1303	0.00162573	0.00650797
hsa_circ_0039349|circRNA|hsa_circ_0039349|hsa_circ_0039349|hsa_circ_0039349|0|600	0.669699	1.84856	9.88904	0.00184465	0.00719151
hsa_circ_0013171|circRNA|hsa_circ_0013171|hsa_circ_0013171|hsa_circ_0013171|0|600	0.669607	1.30701	7.32777	0.0072141	0.020555
hsa_circ_0070036|circRNA|hsa_circ_0070036|hsa_circ_0070036|hsa_circ_0070036|0|600	0.669385	1.02154	7.70467	0.00588528	0.0175354
ENSG00000204406.12|mRNA|MBD5|ENSG00000204406.12|ENSG00000204406.12|0|24256	0.669	6.69718	20.4841	8.95453e-06	0.000133982
hsa_circ_0000467|circRNA|hsa_circ_0000467|hsa_circ_0000467|hsa_circ_0000467|0|600	0.668955	5.87419	10.9335	0.00106981	0.0047522
ENSG00000255418.5|lncRNA|AC090092.1|ENSG00000255418.5|ENSG00000255418.5|0|930	0.668924	4.06185	12.8293	0.000403327	0.00229511
ENSG00000105825.11|mRNA|TFPI2|ENSG00000105825.11|ENSG00000105825.11|0|2663	0.66859	2.90733	9.56927	0.00218203	0.00817443
ENSG00000277978.1|lncRNA|AC010542.5|ENSG00000277978.1|ENSG00000277978.1|0|382	0.668461	2.4161	8.20215	0.00450604	0.0143087
hsa_circ_0027443|circRNA|hsa_circ_0027443|hsa_circ_0027443|hsa_circ_0027443|0|600	0.668441	1.09509	7.72901	0.00580862	0.0173812
hsa_circ_0003931|circRNA|hsa_circ_0003931|hsa_circ_0003931|hsa_circ_0003931|0|600	0.668373	1.90215	9.44506	0.00232953	0.00861152
ENSG00000131781.12|mRNA|FMO5|ENSG00000131781.12|ENSG00000131781.12|0|5986	0.66832	4.86857	16.8582	5.31377e-05	0.000505644
ENSG00000069966.18|mRNA|GNB5|ENSG00000069966.18|ENSG00000069966.18|0|13302	0.668156	7.75919	14.6654	0.00015901	0.00114535
ENSG00000120159.11|mRNA|CAAP1|ENSG00000120159.11|ENSG00000120159.11|0|3014	0.668074	6.33757	17.0227	4.89736e-05	0.000474856
ENSG00000137941.16|mRNA|TTLL7|ENSG00000137941.16|ENSG00000137941.16|0|10543	0.667764	5.53682	8.956	0.00301645	0.0104686
ENSG00000259753.1|mRNA|AC068234.1|ENSG00000259753.1|ENSG00000259753.1|0|2785	0.667664	11.5704	7.68752	0.00593991	0.0176665
ENSG00000135315.11|mRNA|CEP162|ENSG00000135315.11|ENSG00000135315.11|0|5474	0.667448	8.05161	14.335	0.000187833	0.00129496
hsa_circ_0007123|circRNA|hsa_circ_0007123|hsa_circ_0007123|hsa_circ_0007123|0|600	0.667435	1.62933	9.05919	0.00285603	0.0100602
ENSG00000101605.12|mRNA|MYOM1|ENSG00000101605.12|ENSG00000101605.12|0|6574	0.66741	6.4626	11.1443	0.000959103	0.00436942
ENSG00000223911.1|lncRNA|AC009480.1|ENSG00000223911.1|ENSG00000223911.1|0|412	0.666992	5.19187	11.3689	0.000853874	0.00399496
ENSG00000182220.14|mRNA|ATP6AP2|ENSG00000182220.14|ENSG00000182220.14|0|9560	0.666906	6.64348	19.7759	1.26431e-05	0.00017201
ENSG00000109572.13|mRNA|CLCN3|ENSG00000109572.13|ENSG00000109572.13|0|8123	0.666454	9.16617	10.4189	0.00139819	0.00578568
hsa_circ_0032965|circRNA|hsa_circ_0032965|hsa_circ_0032965|hsa_circ_0032965|0|600	0.666407	2.3052	10.5982	0.00127352	0.00538715
ENSG00000134198.9|mRNA|TSPAN2|ENSG00000134198.9|ENSG00000134198.9|0|3410	0.666186	4.75252	11.1925	0.000935426	0.00429293
hsa_circ_0041680|circRNA|hsa_circ_0041680|hsa_circ_0041680|hsa_circ_0041680|0|600	0.666041	1.11053	6.19613	0.0133937	0.0331794
hsa_circ_0005181|circRNA|hsa_circ_0005181|hsa_circ_0005181|hsa_circ_0005181|0|600	0.665994	1.2564	8.60011	0.00364399	0.0121152
ENSG00000168497.4|mRNA|CAVIN2|ENSG00000168497.4|ENSG00000168497.4|0|3229	0.665989	8.49784	10.933	0.00107013	0.00475255
ENSG00000258551.5|lncRNA|CRAT37|ENSG00000258551.5|ENSG00000258551.5|0|2609	0.665913	1.95689	7.90789	0.00527589	0.0160997
ENSG00000248510.2|lncRNA|LINC02267|ENSG00000248510.2|ENSG00000248510.2|0|2423	0.665831	2.71271	7.36316	0.00707716	0.0202604
ENSG00000234902.6|lncRNA|AC007879.3|ENSG00000234902.6|ENSG00000234902.6|0|1095	0.665754	2.10117	9.69913	0.00203802	0.00774105
hsa_circ_0002512|circRNA|hsa_circ_0002512|hsa_circ_0002512|hsa_circ_0002512|0|600	0.66568	1.09106	7.55237	0.00638904	0.0187011
hsa_circ_0067883|circRNA|hsa_circ_0067883|hsa_circ_0067883|hsa_circ_0067883|0|600	0.665567	3.49778	11.639	0.000742737	0.0036026
ENSG00000116793.15|mRNA|PHTF1|ENSG00000116793.15|ENSG00000116793.15|0|7170	0.665476	5.52224	15.6636	9.63551e-05	0.000785692
ENSG00000185825.15|mRNA|BCAP31|ENSG00000185825.15|ENSG00000185825.15|0|2624	0.665193	8.15032	13.1708	0.000338881	0.00201035
hsa_circ_0001348|circRNA|hsa_circ_0001348|hsa_circ_0001348|hsa_circ_0001348|0|600	0.665168	2.52002	11.6228	0.000748973	0.00361964
hsa_circ_0006296|circRNA|hsa_circ_0006296|hsa_circ_0006296|hsa_circ_0006296|0|600	0.665073	1.07937	7.07766	0.00826294	0.0227977
ENSG00000257267.3|pseudogene|ZNF271P|ENSG00000257267.3|ENSG00000257267.3|0|7450	0.664646	7.64574	15.534	0.00010281	0.000823185
hsa_circ_0001424|circRNA|hsa_circ_0001424|hsa_circ_0001424|hsa_circ_0001424|0|600	0.664576	1.35729	7.90025	0.00529759	0.0161461
hsa_circ_0077241|circRNA|hsa_circ_0077241|hsa_circ_0077241|hsa_circ_0077241|0|600	0.664176	1.2956	8.31331	0.00424606	0.0136681
ENSG00000185420.18|mRNA|SMYD3|ENSG00000185420.18|ENSG00000185420.18|0|5866	0.664096	6.53691	15.1803	0.000122752	0.000942011
ENSG00000125257.13|mRNA|ABCC4|ENSG00000125257.13|ENSG00000125257.13|0|7819	0.663769	9.22095	10.2316	0.00154187	0.00624164
hsa_circ_0016052|circRNA|hsa_circ_0016052|hsa_circ_0016052|hsa_circ_0016052|0|530	0.663612	1.22424	7.58257	0.00628574	0.0184573
hsa_circ_0006297|circRNA|hsa_circ_0006297|hsa_circ_0006297|hsa_circ_0006297|0|600	0.663563	1.11332	7.41124	0.00689538	0.019874
hsa_circ_0002474|circRNA|hsa_circ_0002474|hsa_circ_0002474|hsa_circ_0002474|0|600	0.66346	3.90682	8.43637	0.00397614	0.0129858
hsa_circ_0003081|circRNA|hsa_circ_0003081|hsa_circ_0003081|hsa_circ_0003081|0|600	0.663367	1.31659	9.56413	0.00218795	0.00819045
ENSG00000262879.5|lncRNA|AC068152.1|ENSG00000262879.5|ENSG00000262879.5|0|3348	0.663261	5.7523	18.4604	2.40826e-05	0.000276368
hsa_circ_0005882|circRNA|hsa_circ_0005882|hsa_circ_0005882|hsa_circ_0005882|0|600	0.663078	5.66818	11.4193	0.000831896	0.00391879
hsa_circ_0086461|circRNA|hsa_circ_0086461|hsa_circ_0086461|hsa_circ_0086461|0|600	0.663055	2.20115	7.96396	0.00511944	0.0157419
hsa_circ_0000236|circRNA|hsa_circ_0000236|hsa_circ_0000236|hsa_circ_0000236|0|600	0.662651	2.8402	9.71739	0.00201856	0.00768764
ENSG00000171928.13|mRNA|TVP23B|ENSG00000171928.13|ENSG00000171928.13|0|5862	0.662643	7.14445	12.8223	0.000404756	0.00229996
hsa_circ_0002274|circRNA|hsa_circ_0002274|hsa_circ_0002274|hsa_circ_0002274|0|600	0.662606	2.2229	8.41855	0.0040141	0.0130905
ENSG00000138594.13|mRNA|TMOD3|ENSG00000138594.13|ENSG00000138594.13|0|10632	0.662481	9.10946	21.5714	5.28624e-06	8.94267e-05
ENSG00000109339.20|mRNA|MAPK10|ENSG00000109339.20|ENSG00000109339.20|0|42646	0.662289	4.2219	7.99045	0.00504718	0.0155711
ENSG00000150093.18|mRNA|ITGB1|ENSG00000150093.18|ENSG00000150093.18|0|6011	0.662105	11.6203	9.98937	0.00175016	0.00689861
hsa_circ_0081006|circRNA|hsa_circ_0081006|hsa_circ_0081006|hsa_circ_0081006|0|600	0.661705	2.69575	7.18082	0.00781254	0.0218696
hsa_circ_0006588|circRNA|hsa_circ_0006588|hsa_circ_0006588|hsa_circ_0006588|0|600	0.661579	1.75249	6.85665	0.00932021	0.0249653
ENSG00000270028.1|lncRNA|AC079315.1|ENSG00000270028.1|ENSG00000270028.1|0|623	0.661575	2.16937	8.53765	0.00376719	0.0124337
hsa_circ_0057522|circRNA|hsa_circ_0057522|hsa_circ_0057522|hsa_circ_0057522|0|600	0.661158	1.46267	7.98226	0.0050694	0.0156207
hsa_circ_0068367|circRNA|hsa_circ_0068367|hsa_circ_0068367|hsa_circ_0068367|0|600	0.66113	3.19225	9.9052	0.00182909	0.00714755
hsa_circ_0007249|circRNA|hsa_circ_0007249|hsa_circ_0007249|hsa_circ_0007249|0|600	0.661098	2.99008	11.6096	0.000754096	0.0036362
hsa_circ_0079799|circRNA|hsa_circ_0079799|hsa_circ_0079799|hsa_circ_0079799|0|600	0.661088	3.03937	10.4047	0.0014086	0.00581427
ENSG00000180628.14|mRNA|PCGF5|ENSG00000180628.14|ENSG00000180628.14|0|8306	0.661013	10.309	11.2743	0.000896667	0.00415135
hsa_circ_0006722|circRNA|hsa_circ_0006722|hsa_circ_0006722|hsa_circ_0006722|0|600	0.660862	1.46222	8.75388	0.0033579	0.0113418
hsa_circ_0086423|circRNA|hsa_circ_0086423|hsa_circ_0086423|hsa_circ_0086423|0|600	0.660505	1.3446	6.33046	0.0124372	0.0313365
hsa_circ_0079040|circRNA|hsa_circ_0079040|hsa_circ_0079040|hsa_circ_0079040|0|600	0.660489	1.59489	5.35925	0.021348	0.0476988
ENSG00000160551.11|mRNA|TAOK1|ENSG00000160551.11|ENSG00000160551.11|0|16980	0.66035	9.55235	14.5032	0.00017255	0.00121823
ENSG00000151838.11|mRNA|CCDC175|ENSG00000151838.11|ENSG00000151838.11|0|3245	0.660119	9.09466	7.82567	0.00551423	0.0166714
ENSG00000127533.3|mRNA|F2RL3|ENSG00000127533.3|ENSG00000127533.3|0|3473	0.660105	2.07519	8.11645	0.00471755	0.0148176
hsa_circ_0002314|circRNA|hsa_circ_0002314|hsa_circ_0002314|hsa_circ_0002314|0|600	0.659984	1.40697	5.62101	0.018435	0.0424826
ENSG00000257261.5|lncRNA|AC008014.1|ENSG00000257261.5|ENSG00000257261.5|0|2227	0.65996	5.79731	9.45634	0.00231572	0.00857379
hsa_circ_0005207|circRNA|hsa_circ_0005207|hsa_circ_0005207|hsa_circ_0005207|0|600	0.659873	1.39181	9.16565	0.00269965	0.00964956
ENSG00000174175.16|mRNA|SELP|ENSG00000174175.16|ENSG00000174175.16|0|3490	0.659455	8.65123	8.17687	0.0045674	0.014469
hsa_circ_0006267|circRNA|hsa_circ_0006267|hsa_circ_0006267|hsa_circ_0006267|0|600	0.659372	1.47388	8.85537	0.00318177	0.0108908
ENSG00000196071.5|mRNA|OR2L13|ENSG00000196071.5|ENSG00000196071.5|0|2019	0.658884	2.02542	8.26338	0.00436088	0.0139566
ENSG00000214188.9|lncRNA|ST7-OT4|ENSG00000214188.9|ENSG00000214188.9|0|2664	0.658569	2.13026	9.09158	0.0028075	0.00992127
ENSG00000113658.16|mRNA|SMAD5|ENSG00000113658.16|ENSG00000113658.16|0|8779	0.658235	6.23396	11.6307	0.000745905	0.00361445
ENSG00000105737.9|mRNA|GRIK5|ENSG00000105737.9|ENSG00000105737.9|0|5014	0.658229	2.03316	8.95911	0.00301148	0.0104568
hsa_circ_0032931|circRNA|hsa_circ_0032931|hsa_circ_0032931|hsa_circ_0032931|0|600	0.658202	1.59798	8.76065	0.00334584	0.0113155
hsa_circ_0007548|circRNA|hsa_circ_0007548|hsa_circ_0007548|hsa_circ_0007548|0|600	0.658117	1.01538	6.89425	0.00913096	0.0245731
ENSG00000280913.2|pseudogene|CTSLP2|ENSG00000280913.2|ENSG00000280913.2|0|1476	0.658071	2.0511	7.49041	0.00660645	0.0192134
ENSG00000175324.9|mRNA|LSM1|ENSG00000175324.9|ENSG00000175324.9|0|1690	0.657924	6.65518	19.8344	1.22876e-05	0.000169077
ENSG00000151023.16|mRNA|ENKUR|ENSG00000151023.16|ENSG00000151023.16|0|4076	0.657912	9.4531	7.20753	0.00770007	0.0216185
ENSG00000244528.1|pseudogene|SEPT14P2|ENSG00000244528.1|ENSG00000244528.1|0|183	0.657799	6.07695	15.9754	8.24571e-05	0.000700727
hsa_circ_0054886|circRNA|hsa_circ_0054886|hsa_circ_0054886|hsa_circ_0054886|0|600	0.657714	3.11615	10.179	0.00158486	0.00637476
ENSG00000165309.13|mRNA|ARMC3|ENSG00000165309.13|ENSG00000165309.13|0|6999	0.657685	7.03263	7.46864	0.00668464	0.0193843
hsa_circ_0071168|circRNA|hsa_circ_0071168|hsa_circ_0071168|hsa_circ_0071168|0|600	0.657465	2.44927	8.56492	0.00371289	0.0123013
hsa_circ_0035957|circRNA|hsa_circ_0035957|hsa_circ_0035957|hsa_circ_0035957|0|600	0.657218	3.16451	10.6236	0.00125681	0.00534251
hsa_circ_0003441|circRNA|hsa_circ_0003441|hsa_circ_0003441|hsa_circ_0003441|0|600	0.657076	4.02946	11.0077	0.00102942	0.00461076
hsa_circ_0006789|circRNA|hsa_circ_0006789|hsa_circ_0006789|hsa_circ_0006789|0|346	0.657034	3.88521	13.2543	0.000324772	0.00194639
ENSG00000198948.11|mRNA|MFAP3L|ENSG00000198948.11|ENSG00000198948.11|0|8741	0.656704	7.92694	8.73409	0.00339338	0.0114384
hsa_circ_0036347|circRNA|hsa_circ_0036347|hsa_circ_0036347|hsa_circ_0036347|0|600	0.656289	1.21404	7.51812	0.00650828	0.018975
hsa_circ_0073379|circRNA|hsa_circ_0073379|hsa_circ_0073379|hsa_circ_0073379|0|600	0.656228	1.50063	8.55331	0.00373591	0.012352
hsa_circ_0020181|circRNA|hsa_circ_0020181|hsa_circ_0020181|hsa_circ_0020181|0|600	0.656188	0.988998	8.84449	0.00320018	0.0109388
ENSG00000164181.13|mRNA|ELOVL7|ENSG00000164181.13|ENSG00000164181.13|0|4576	0.656022	8.77823	7.85285	0.00543424	0.0164839
ENSG00000117640.17|mRNA|MTFR1L|ENSG00000117640.17|ENSG00000117640.17|0|5817	0.655822	6.78272	15.4232	0.000108679	0.000858025
ENSG00000137801.10|mRNA|THBS1|ENSG00000137801.10|ENSG00000137801.10|0|9158	0.65564	10.4861	7.35537	0.00710707	0.0203198
ENSG00000114805.16|mRNA|PLCH1|ENSG00000114805.16|ENSG00000114805.16|0|7173	0.655509	5.51072	8.62098	0.00360374	0.0120135
hsa_circ_0079860|circRNA|hsa_circ_0079860|hsa_circ_0079860|hsa_circ_0079860|0|600	0.655361	4.88842	11.0062	0.00103021	0.00461328
hsa_circ_0070937|circRNA|hsa_circ_0070937|hsa_circ_0070937|hsa_circ_0070937|0|600	0.655241	1.52549	8.59562	0.0036527	0.0121401
ENSG00000255007.1|lncRNA|LINC02489|ENSG00000255007.1|ENSG00000255007.1|0|354	0.655188	2.99464	5.9195	0.0156111	0.0373426
ENSG00000165389.6|mRNA|SPTSSA|ENSG00000165389.6|ENSG00000165389.6|0|2777	0.65488	4.75161	14.8491	0.000144968	0.0010693
hsa_circ_0027462|circRNA|hsa_circ_0027462|hsa_circ_0027462|hsa_circ_0027462|0|600	0.654492	5.17626	9.18318	0.00267476	0.00959324
ENSG00000087470.17|mRNA|DNM1L|ENSG00000087470.17|ENSG00000087470.17|0|7282	0.654408	7.67022	17.1121	4.68514e-05	0.000458514
ENSG00000163359.15|mRNA|COL6A3|ENSG00000163359.15|ENSG00000163359.15|0|19633	0.654325	5.69378	6.38869	0.0120448	0.030599
hsa_circ_0004535|circRNA|hsa_circ_0004535|hsa_circ_0004535|hsa_circ_0004535|0|600	0.654244	1.20848	8.15899	0.0046113	0.0145641
ENSG00000102780.16|mRNA|DGKH|ENSG00000102780.16|ENSG00000102780.16|0|19637	0.654218	5.13713	12.7036	0.000430058	0.00240536
ENSG00000109265.13|mRNA|KIAA1211|ENSG00000109265.13|ENSG00000109265.13|0|6489	0.654106	4.78739	10.8261	0.00113118	0.00494782
ENSG00000168615.11|mRNA|ADAM9|ENSG00000168615.11|ENSG00000168615.11|0|6913	0.6541	7.91512	9.76457	0.00196915	0.00755051
hsa_circ_0022189|circRNA|hsa_circ_0022189|hsa_circ_0022189|hsa_circ_0022189|0|600	0.653896	1.09129	6.93853	0.00891313	0.0241375
ENSG00000263327.6|lncRNA|TAPT1-AS1|ENSG00000263327.6|ENSG00000263327.6|0|2763	0.653774	4.14547	10.346	0.00145246	0.00595953
ENSG00000011258.15|mRNA|MBTD1|ENSG00000011258.15|ENSG00000011258.15|0|7201	0.653587	7.74298	14.0825	0.000213382	0.00142042
ENSG00000145431.10|mRNA|PDGFC|ENSG00000145431.10|ENSG00000145431.10|0|5593	0.653568	6.21182	8.6711	0.00350893	0.0117623
ENSG00000234449.2|lncRNA|FAM239A|ENSG00000234449.2|ENSG00000234449.2|0|4381	0.653472	6.64524	6.36531	0.0122008	0.0309008
ENSG00000246889.2|lncRNA|AP000487.1|ENSG00000246889.2|ENSG00000246889.2|0|3078	0.652749	5.13712	9.05357	0.00286454	0.0100746
ENSG00000173852.14|mRNA|DPY19L1|ENSG00000173852.14|ENSG00000173852.14|0|6278	0.652714	7.0004	10.204	0.00156428	0.00631443
hsa_circ_0017289|circRNA|hsa_circ_0017289|hsa_circ_0017289|hsa_circ_0017289|0|600	0.652702	1.62417	6.17273	0.013568	0.0335041
hsa_circ_0006866|circRNA|hsa_circ_0006866|hsa_circ_0006866|hsa_circ_0006866|0|600	0.652599	1.24903	8.23114	0.0044367	0.0141358
hsa_circ_0003647|circRNA|hsa_circ_0003647|hsa_circ_0003647|hsa_circ_0003647|0|600	0.652518	2.28875	10.2104	0.00155905	0.00629713
hsa_circ_0035194|circRNA|hsa_circ_0035194|hsa_circ_0035194|hsa_circ_0035194|0|600	0.65245	1.47599	7.81768	0.00553797	0.0167305
ENSG00000183690.12|mRNA|EFHC2|ENSG00000183690.12|ENSG00000183690.12|0|3319	0.652433	7.42616	8.42645	0.00399723	0.0130461
ENSG00000165646.11|mRNA|SLC18A2|ENSG00000165646.11|ENSG00000165646.11|0|4125	0.652084	4.81529	9.22226	0.00262009	0.00944015
hsa_circ_0061557|circRNA|hsa_circ_0061557|hsa_circ_0061557|hsa_circ_0061557|0|600	0.652025	0.993161	7.27108	0.00743915	0.0210609
ENSG00000106976.20|mRNA|DNM1|ENSG00000106976.20|ENSG00000106976.20|0|10775	0.651997	5.05794	7.26409	0.00746739	0.0211205
ENSG00000213625.8|mRNA|LEPROT|ENSG00000213625.8|ENSG00000213625.8|0|5237	0.65189	7.74018	9.35483	0.00244301	0.00894713
ENSG00000245552.6|lncRNA|AP000787.1|ENSG00000245552.6|ENSG00000245552.6|0|5320	0.651882	3.99408	14.4995	0.000172874	0.00121879
hsa_circ_0037002|circRNA|hsa_circ_0037002|hsa_circ_0037002|hsa_circ_0037002|0|600	0.651434	3.24463	12.9357	0.000382003	0.00220331
ENSG00000174233.11|mRNA|ADCY6|ENSG00000174233.11|ENSG00000174233.11|0|8410	0.651372	3.45953	9.18031	0.00267881	0.00960088
ENSG00000168118.11|mRNA|RAB4A|ENSG00000168118.11|ENSG00000168118.11|0|3310	0.651301	8.43884	14.4303	0.000179013	0.00124849
ENSG00000233621.1|lncRNA|LINC01137|ENSG00000233621.1|ENSG00000233621.1|0|1395	0.651287	2.36916	8.85242	0.00318675	0.010904
hsa_circ_0030571|circRNA|hsa_circ_0030571|hsa_circ_0030571|hsa_circ_0030571|0|558	0.650983	2.10935	8.9453	0.0030336	0.0105025
ENSG00000049323.15|mRNA|LTBP1|ENSG00000049323.15|ENSG00000049323.15|0|7329	0.650914	9.93254	8.58401	0.00367534	0.0121991
hsa_circ_0057165|circRNA|hsa_circ_0057165|hsa_circ_0057165|hsa_circ_0057165|0|192	0.650612	1.16628	7.45563	0.00673181	0.0194899
hsa_circ_0079647|circRNA|hsa_circ_0079647|hsa_circ_0079647|hsa_circ_0079647|0|366	0.650444	1.20594	8.38929	0.00407727	0.0132402
ENSG00000182732.16|mRNA|RGS6|ENSG00000182732.16|ENSG00000182732.16|0|8937	0.650413	7.93707	9.15158	0.0027198	0.00969552
ENSG00000145495.15|mRNA|MARCH6|ENSG00000145495.15|ENSG00000145495.15|0|11336	0.65033	8.69641	17.0424	4.84979e-05	0.00047116
ENSG00000138449.10|mRNA|SLC40A1|ENSG00000138449.10|ENSG00000138449.10|0|4330	0.650209	8.75282	11.8742	0.000658012	0.00328779
hsa_circ_0005801|circRNA|hsa_circ_0005801|hsa_circ_0005801|hsa_circ_0005801|0|600	0.650027	2.36927	9.98638	0.0017529	0.00690668
hsa_circ_0068374|circRNA|hsa_circ_0068374|hsa_circ_0068374|hsa_circ_0068374|0|600	0.649904	0.939152	7.26494	0.00746396	0.0211191
hsa_circ_0091359|circRNA|hsa_circ_0091359|hsa_circ_0091359|hsa_circ_0091359|0|600	0.649882	3.20292	9.50303	0.00225946	0.00840922
ENSG00000185896.10|mRNA|LAMP1|ENSG00000185896.10|ENSG00000185896.10|0|5739	0.649871	7.58103	14.0084	0.000221527	0.00145917
hsa_circ_0005501|circRNA|hsa_circ_0005501|hsa_circ_0005501|hsa_circ_0005501|0|600	0.649831	1.84578	9.10191	0.0027922	0.00988998
ENSG00000111196.9|mRNA|MAGOHB|ENSG00000111196.9|ENSG00000111196.9|0|4856	0.6498	6.80147	13.1215	0.000347486	0.00204563
hsa_circ_0086190|circRNA|hsa_circ_0086190|hsa_circ_0086190|hsa_circ_0086190|0|600	0.649733	1.17832	8.16203	0.00460381	0.0145497
hsa_circ_0080836|circRNA|hsa_circ_0080836|hsa_circ_0080836|hsa_circ_0080836|0|600	0.649661	2.80832	7.96083	0.00512804	0.0157546
hsa_circ_0007549|circRNA|hsa_circ_0007549|hsa_circ_0007549|hsa_circ_0007549|0|600	0.649657	1.5228	8.45781	0.00393094	0.0128676
ENSG00000136295.14|mRNA|TTYH3|ENSG00000136295.14|ENSG00000136295.14|0|6129	0.649539	6.47496	8.84742	0.00319521	0.0109274
hsa_circ_0000539|circRNA|hsa_circ_0000539|hsa_circ_0000539|hsa_circ_0000539|0|600	0.649458	3.19142	12.3335	0.000519742	0.00275811
ENSG00000176018.12|mRNA|LYSMD3|ENSG00000176018.12|ENSG00000176018.12|0|4459	0.649443	5.29593	17.3528	4.15856e-05	0.000418268
ENSG00000140479.16|mRNA|PCSK6|ENSG00000140479.16|ENSG00000140479.16|0|13239	0.649288	8.2927	8.64464	0.00355866	0.0119009
ENSG00000177200.16|mRNA|CHD9|ENSG00000177200.16|ENSG00000177200.16|0|16502	0.649286	9.61193	13.5993	0.000272558	0.00170949
hsa_circ_0081028|circRNA|hsa_circ_0081028|hsa_circ_0081028|hsa_circ_0081028|0|600	0.649214	1.70572	8.58097	0.00368128	0.0122168
hsa_circ_0075568|circRNA|hsa_circ_0075568|hsa_circ_0075568|hsa_circ_0075568|0|600	0.649104	2.0718	7.84869	0.00544642	0.0165017
ENSG00000185245.7|mRNA|GP1BA|ENSG00000185245.7|ENSG00000185245.7|0|2501	0.648979	7.81349	10.4216	0.00139626	0.00577888
ENSG00000226435.10|pseudogene|ANKRD18DP|ENSG00000226435.10|ENSG00000226435.10|0|3449	0.648879	3.41392	7.11315	0.00810504	0.0224521
ENSG00000116747.12|mRNA|TROVE2|ENSG00000116747.12|ENSG00000116747.12|0|9102	0.648608	6.90324	26.9492	4.06259e-07	1.25044e-05
ENSG00000224616.1|lncRNA|RTCA-AS1|ENSG00000224616.1|ENSG00000224616.1|0|423	0.648559	5.61833	9.58426	0.0021649	0.00812856
hsa_circ_0087509|circRNA|hsa_circ_0087509|hsa_circ_0087509|hsa_circ_0087509|0|600	0.648459	1.93732	7.10283	0.00815065	0.0225502
hsa_circ_0008463|circRNA|hsa_circ_0008463|hsa_circ_0008463|hsa_circ_0008463|0|600	0.64844	2.69446	8.03983	0.00491527	0.0152607
ENSG00000119684.15|mRNA|MLH3|ENSG00000119684.15|ENSG00000119684.15|0|8363	0.648415	9.36249	8.30371	0.00426789	0.0137207
ENSG00000147576.15|mRNA|ADHFE1|ENSG00000147576.15|ENSG00000147576.15|0|3750	0.648339	3.2576	11.3864	0.000846185	0.0039655
ENSG00000102384.13|mRNA|CENPI|ENSG00000102384.13|ENSG00000102384.13|0|4321	0.648259	4.21146	13.1026	0.000350858	0.00206001
ENSG00000270055.1|lncRNA|AC127502.2|ENSG00000270055.1|ENSG00000270055.1|0|2351	0.647868	5.92952	7.5779	0.00630158	0.018494
ENSG00000196611.4|mRNA|MMP1|ENSG00000196611.4|ENSG00000196611.4|0|1970	0.647802	3.65199	5.87481	0.0160035	0.0380485
ENSG00000283684.1|lncRNA|AC013268.5|ENSG00000283684.1|ENSG00000283684.1|0|1959	0.647671	3.04579	7.6742	0.0059827	0.0177697
ENSG00000100427.15|mRNA|MLC1|ENSG00000100427.15|ENSG00000100427.15|0|4297	0.647665	4.11158	8.06324	0.00485396	0.0151198
hsa_circ_0039264|circRNA|hsa_circ_0039264|hsa_circ_0039264|hsa_circ_0039264|0|600	0.647345	1.32796	8.10439	0.00474813	0.0148902
hsa_circ_0005962|circRNA|hsa_circ_0005962|hsa_circ_0005962|hsa_circ_0005962|0|600	0.647326	4.09151	13.4504	0.000293962	0.00180236
hsa_circ_0086724|circRNA|hsa_circ_0086724|hsa_circ_0086724|hsa_circ_0086724|0|600	0.647314	4.83492	10.7788	0.00115933	0.00503884
ENSG00000176273.14|mRNA|SLC35G1|ENSG00000176273.14|ENSG00000176273.14|0|6829	0.647254	3.08353	8.78655	0.00330013	0.011196
ENSG00000165480.15|mRNA|SKA3|ENSG00000165480.15|ENSG00000165480.15|0|3048	0.647061	6.78819	16.6518	5.88723e-05	0.000543363
hsa_circ_0013953|circRNA|hsa_circ_0013953|hsa_circ_0013953|hsa_circ_0013953|0|600	0.646935	2.42841	9.1298	0.0027513	0.00977811
hsa_circ_0091680|circRNA|hsa_circ_0091680|hsa_circ_0091680|hsa_circ_0091680|0|600	0.646716	1.25542	8.90597	0.00309751	0.0106756
ENSG00000148484.17|mRNA|RSU1|ENSG00000148484.17|ENSG00000148484.17|0|4191	0.646604	11.5182	10.0327	0.00171086	0.00677047
hsa_circ_0034517|circRNA|hsa_circ_0034517|hsa_circ_0034517|hsa_circ_0034517|0|600	0.646512	2.41835	7.12643	0.00804675	0.0223542
ENSG00000198513.11|mRNA|ATL1|ENSG00000198513.11|ENSG00000198513.11|0|4360	0.646511	6.2172	9.80886	0.0019239	0.0074235
ENSG00000147400.8|mRNA|CETN2|ENSG00000147400.8|ENSG00000147400.8|0|1928	0.646413	7.10943	13.9254	0.000231037	0.00150836
ENSG00000233540.1|lncRNA|DNM3-IT1|ENSG00000233540.1|ENSG00000233540.1|0|396	0.646266	2.20284	7.96133	0.00512666	0.0157528
ENSG00000269556.7|mRNA|TMEM185A|ENSG00000269556.7|ENSG00000269556.7|0|5158	0.645944	6.083	9.69944	0.00203768	0.00774105
hsa_circ_0001756|circRNA|hsa_circ_0001756|hsa_circ_0001756|hsa_circ_0001756|0|600	0.645787	4.93875	12.8874	0.000391529	0.00224591
hsa_circ_0083054|circRNA|hsa_circ_0083054|hsa_circ_0083054|hsa_circ_0083054|0|518	0.64577	1.93666	8.64316	0.00356145	0.0119063
hsa_circ_0000080|circRNA|hsa_circ_0000080|hsa_circ_0000080|hsa_circ_0000080|0|600	0.645746	2.01483	7.45089	0.00674909	0.0195343
ENSG00000136404.15|mRNA|TM6SF1|ENSG00000136404.15|ENSG00000136404.15|0|2661	0.645596	6.65993	9.21082	0.00263598	0.00948485
hsa_circ_0036044|circRNA|hsa_circ_0036044|hsa_circ_0036044|hsa_circ_0036044|0|600	0.64559	2.7852	9.55027	0.00220396	0.0082411
ENSG00000259719.5|lncRNA|LINC02284|ENSG00000259719.5|ENSG00000259719.5|0|846	0.645371	7.40134	8.36474	0.00413104	0.013373
ENSG00000138772.12|mRNA|ANXA3|ENSG00000138772.12|ENSG00000138772.12|0|5123	0.645218	7.40512	8.72239	0.00341455	0.0115
hsa_circ_0053933|circRNA|hsa_circ_0053933|hsa_circ_0053933|hsa_circ_0053933|0|600	0.645133	2.02157	9.08759	0.00281343	0.00993863
hsa_circ_0007734|circRNA|hsa_circ_0007734|hsa_circ_0007734|hsa_circ_0007734|0|600	0.644867	2.66733	8.68016	0.00349205	0.0117116
hsa_circ_0064471|circRNA|hsa_circ_0064471|hsa_circ_0064471|hsa_circ_0064471|0|600	0.64464	1.05545	8.27886	0.00432496	0.0138661
hsa_circ_0031571|circRNA|hsa_circ_0031571|hsa_circ_0031571|hsa_circ_0031571|0|600	0.644617	2.63411	8.51259	0.00381783	0.0125779
ENSG00000177324.13|mRNA|BEND2|ENSG00000177324.13|ENSG00000177324.13|0|4637	0.644253	9.40884	7.22652	0.00762114	0.0214392
hsa_circ_0085307|circRNA|hsa_circ_0085307|hsa_circ_0085307|hsa_circ_0085307|0|600	0.644201	1.63165	8.46813	0.00390936	0.0128117
ENSG00000151090.17|mRNA|THRB|ENSG00000151090.17|ENSG00000151090.17|0|8709	0.64414	5.42549	8.56125	0.00372015	0.0123171
hsa_circ_0005490|circRNA|hsa_circ_0005490|hsa_circ_0005490|hsa_circ_0005490|0|600	0.644115	1.07017	6.01685	0.0147903	0.0358218
ENSG00000075945.12|mRNA|KIFAP3|ENSG00000075945.12|ENSG00000075945.12|0|4978	0.643907	7.83184	13.4113	0.000299864	0.00183235
hsa_circ_0000119|circRNA|hsa_circ_0000119|hsa_circ_0000119|hsa_circ_0000119|0|600	0.643733	5.85418	16.7374	5.64207e-05	0.000528202
ENSG00000127252.5|mRNA|HRASLS|ENSG00000127252.5|ENSG00000127252.5|0|1169	0.64371	5.59222	8.08576	0.00479576	0.0149924
hsa_circ_0005086|circRNA|hsa_circ_0005086|hsa_circ_0005086|hsa_circ_0005086|0|600	0.643639	1.9653	9.78894	0.00194412	0.00747838
ENSG00000225643.1|lncRNA|AL606491.1|ENSG00000225643.1|ENSG00000225643.1|0|483	0.64358	1.71103	7.45668	0.006728	0.0194888
hsa_circ_0009102|circRNA|hsa_circ_0009102|hsa_circ_0009102|hsa_circ_0009102|0|600	0.643536	3.18524	10.2094	0.00155986	0.00629912
hsa_circ_0072084|circRNA|hsa_circ_0072084|hsa_circ_0072084|hsa_circ_0072084|0|420	0.643458	1.0048	7.02215	0.00851628	0.0233096
ENSG00000120594.16|mRNA|PLXDC2|ENSG00000120594.16|ENSG00000120594.16|0|12567	0.643379	8.42411	10.5312	0.00131875	0.00552706
hsa_circ_0066740|circRNA|hsa_circ_0066740|hsa_circ_0066740|hsa_circ_0066740|0|600	0.643314	1.46947	7.49616	0.00658596	0.0191622
ENSG00000235078.1|lncRNA|AC231981.1|ENSG00000235078.1|ENSG00000235078.1|0|974	0.643123	2.143	8.23626	0.00442457	0.0141129
ENSG00000162722.8|mRNA|TRIM58|ENSG00000162722.8|ENSG00000162722.8|0|3225	0.643068	9.56494	17.0093	4.92994e-05	0.000477551
ENSG00000162598.13|mRNA|C1orf87|ENSG00000162598.13|ENSG00000162598.13|0|4422	0.643045	2.88157	6.32116	0.0125011	0.0314418
ENSG00000254138.1|lncRNA|AC113386.1|ENSG00000254138.1|ENSG00000254138.1|0|381	0.642939	4.18357	7.96887	0.00510596	0.0157109
hsa_circ_0091089|circRNA|hsa_circ_0091089|hsa_circ_0091089|hsa_circ_0091089|0|600	0.642392	0.902277	5.9112	0.0156831	0.0374521
ENSG00000242441.7|mRNA|GTF2A1L|ENSG00000242441.7|ENSG00000242441.7|0|2054	0.642294	4.2951	5.89223	0.0158493	0.0377765
hsa_circ_0061716|circRNA|hsa_circ_0061716|hsa_circ_0061716|hsa_circ_0061716|0|600	0.642176	1.20533	7.22986	0.00760734	0.0214094
ENSG00000173626.9|mRNA|TRAPPC3L|ENSG00000173626.9|ENSG00000173626.9|0|2757	0.642115	7.32462	7.98446	0.00506343	0.015609
ENSG00000165899.10|mRNA|OTOGL|ENSG00000165899.10|ENSG00000165899.10|0|8380	0.641949	2.76903	8.12458	0.00469705	0.0147648
ENSG00000264023.1|lncRNA|AC068418.1|ENSG00000264023.1|ENSG00000264023.1|0|404	0.641807	2.06288	6.96447	0.00878806	0.023886
hsa_circ_0007692|circRNA|hsa_circ_0007692|hsa_circ_0007692|hsa_circ_0007692|0|600	0.641662	1.98741	9.77628	0.00195708	0.00751666
ENSG00000072042.12|mRNA|RDH11|ENSG00000072042.12|ENSG00000072042.12|0|5518	0.641524	7.64736	9.27787	0.00254426	0.00923649
ENSG00000074416.13|mRNA|MGLL|ENSG00000074416.13|ENSG00000074416.13|0|10102	0.641462	7.67375	11.8418	0.000669073	0.003332
hsa_circ_0069841|circRNA|hsa_circ_0069841|hsa_circ_0069841|hsa_circ_0069841|0|600	0.641348	1.35809	8.5576	0.00372738	0.0123357
ENSG00000259118.5|lncRNA|AL139022.1|ENSG00000259118.5|ENSG00000259118.5|0|1377	0.641317	4.61591	9.46388	0.00230653	0.00854526
hsa_circ_0002673|circRNA|hsa_circ_0002673|hsa_circ_0002673|hsa_circ_0002673|0|600	0.641251	1.80909	9.07024	0.00283938	0.0100167
ENSG00000116717.11|mRNA|GADD45A|ENSG00000116717.11|ENSG00000116717.11|0|2069	0.641145	7.00277	11.9743	0.00062499	0.00316662
hsa_circ_0006466|circRNA|hsa_circ_0006466|hsa_circ_0006466|hsa_circ_0006466|0|600	0.641096	1.33393	6.27854	0.0127983	0.0320077
ENSG00000108953.16|mRNA|YWHAE|ENSG00000108953.16|ENSG00000108953.16|0|3847	0.641019	10.2319	18.5321	2.32478e-05	0.000269423
ENSG00000138031.14|mRNA|ADCY3|ENSG00000138031.14|ENSG00000138031.14|0|6058	0.641014	5.57528	8.27675	0.00432982	0.0138773
ENSG00000197461.13|mRNA|PDGFA|ENSG00000197461.13|ENSG00000197461.13|0|4151	0.640936	7.93749	8.66752	0.00351561	0.0117807
ENSG00000156265.15|mRNA|MAP3K7CL|ENSG00000156265.15|ENSG00000156265.15|0|4497	0.64083	11.2075	9.83199	0.00190069	0.00735959
ENSG00000151229.12|mRNA|SLC2A13|ENSG00000151229.12|ENSG00000151229.12|0|10027	0.640774	3.23132	12.5196	0.000472499	0.00257487
hsa_circ_0018558|circRNA|hsa_circ_0018558|hsa_circ_0018558|hsa_circ_0018558|0|600	0.640416	1.86832	8.71318	0.0034313	0.0115448
ENSG00000139133.6|mRNA|ALG10|ENSG00000139133.6|ENSG00000139133.6|0|4389	0.640325	3.69635	8.8087	0.00326155	0.0110858
hsa_circ_0012824|circRNA|hsa_circ_0012824|hsa_circ_0012824|hsa_circ_0012824|0|600	0.640322	1.35803	8.64433	0.00355924	0.0119009
hsa_circ_0007470|circRNA|hsa_circ_0007470|hsa_circ_0007470|hsa_circ_0007470|0|600	0.64022	2.19432	7.39856	0.00694286	0.0199705
ENSG00000240225.10|pseudogene|ZNF542P|ENSG00000240225.10|ENSG00000240225.10|0|4690	0.640186	6.74691	7.75411	0.00573068	0.0172084
hsa_circ_0000085|circRNA|hsa_circ_0000085|hsa_circ_0000085|hsa_circ_0000085|0|600	0.64018	1.85953	10.4483	0.00137693	0.00572026
hsa_circ_0035956|circRNA|hsa_circ_0035956|hsa_circ_0035956|hsa_circ_0035956|0|600	0.640136	3.49686	8.325	0.00421965	0.0135984
ENSG00000184226.14|mRNA|PCDH9|ENSG00000184226.14|ENSG00000184226.14|0|30944	0.640072	2.62027	8.3834	0.00409011	0.0132662
hsa_circ_0002528|circRNA|hsa_circ_0002528|hsa_circ_0002528|hsa_circ_0002528|0|600	0.639873	3.21727	8.49714	0.00384938	0.0126588
hsa_circ_0007901|circRNA|hsa_circ_0007901|hsa_circ_0007901|hsa_circ_0007901|0|600	0.639662	1.4878	7.48289	0.00663337	0.0192776
ENSG00000049192.14|mRNA|ADAMTS6|ENSG00000049192.14|ENSG00000049192.14|0|8567	0.639597	6.88894	11.8781	0.000656684	0.00328507
ENSG00000154429.10|mRNA|CCSAP|ENSG00000154429.10|ENSG00000154429.10|0|6263	0.639231	5.51167	19.3959	1.52225e-05	0.000197664
ENSG00000070190.12|mRNA|DAPP1|ENSG00000070190.12|ENSG00000070190.12|0|4548	0.639209	9.91783	12.051	0.000600814	0.00307026
ENSG00000265491.4|mRNA|RNF115|ENSG00000265491.4|ENSG00000265491.4|0|11041	0.639011	7.29585	21.1816	6.38344e-06	0.000103351
ENSG00000169504.14|mRNA|CLIC4|ENSG00000169504.14|ENSG00000169504.14|0|4495	0.638939	8.02502	13.8804	0.00023636	0.00153576
ENSG00000232104.3|lncRNA|RFX3-AS1|ENSG00000232104.3|ENSG00000232104.3|0|1562	0.638795	3.81458	12.1573	0.000568908	0.00294941
hsa_circ_0057105|circRNA|hsa_circ_0057105|hsa_circ_0057105|hsa_circ_0057105|0|600	0.63864	1.5073	7.65654	0.00603989	0.0179131
ENSG00000198589.10|mRNA|LRBA|ENSG00000198589.10|ENSG00000198589.10|0|14929	0.638587	10.2704	10.9225	0.00107597	0.00477039
hsa_circ_0077083|circRNA|hsa_circ_0077083|hsa_circ_0077083|hsa_circ_0077083|0|600	0.638536	4.41605	11.6076	0.000754865	0.00363735
ENSG00000188517.14|mRNA|COL25A1|ENSG00000188517.14|ENSG00000188517.14|0|6653	0.638235	2.28224	6.68288	0.0102489	0.0269512
ENSG00000280138.1|lncRNA|AC027290.2|ENSG00000280138.1|ENSG00000280138.1|0|18662	0.638177	5.6478	17.8327	3.28068e-05	0.00034991
hsa_circ_0053865|circRNA|hsa_circ_0053865|hsa_circ_0053865|hsa_circ_0053865|0|600	0.637999	2.07159	8.65195	0.00354484	0.0118667
hsa_circ_0077228|circRNA|hsa_circ_0077228|hsa_circ_0077228|hsa_circ_0077228|0|600	0.637934	0.911575	7.35676	0.00710173	0.0203195
hsa_circ_0037805|circRNA|hsa_circ_0037805|hsa_circ_0037805|hsa_circ_0037805|0|600	0.637897	1.98859	7.0142	0.00855324	0.0233901
ENSG00000260877.2|lncRNA|AP005233.2|ENSG00000260877.2|ENSG00000260877.2|0|372	0.637571	2.53293	6.83614	0.00942516	0.0252058
hsa_circ_0069619|circRNA|hsa_circ_0069619|hsa_circ_0069619|hsa_circ_0069619|0|600	0.637492	1.23787	7.22065	0.00764543	0.0215014
hsa_circ_0015379|circRNA|hsa_circ_0015379|hsa_circ_0015379|hsa_circ_0015379|0|316	0.637152	1.09441	7.6288	0.00613092	0.0181087
hsa_circ_0073706|circRNA|hsa_circ_0073706|hsa_circ_0073706|hsa_circ_0073706|0|600	0.637105	1.93666	7.68139	0.00595955	0.0177144
ENSG00000070214.15|mRNA|SLC44A1|ENSG00000070214.15|ENSG00000070214.15|0|12172	0.636943	6.67865	11.4353	0.000825075	0.00389771
hsa_circ_0064826|circRNA|hsa_circ_0064826|hsa_circ_0064826|hsa_circ_0064826|0|600	0.636898	2.12478	8.38493	0.00408676	0.0132642
hsa_circ_0001673|circRNA|hsa_circ_0001673|hsa_circ_0001673|hsa_circ_0001673|0|600	0.636683	2.79336	10.0978	0.00165359	0.00659757
hsa_circ_0057030|circRNA|hsa_circ_0057030|hsa_circ_0057030|hsa_circ_0057030|0|600	0.636543	1.08123	7.55106	0.00639353	0.0187088
ENSG00000120903.12|mRNA|CHRNA2|ENSG00000120903.12|ENSG00000120903.12|0|5062	0.636507	4.0843	7.56796	0.00633549	0.0185695
ENSG00000131778.18|mRNA|CHD1L|ENSG00000131778.18|ENSG00000131778.18|0|3376	0.636207	7.62482	21.0378	6.84411e-06	0.00010938
hsa_circ_0022007|circRNA|hsa_circ_0022007|hsa_circ_0022007|hsa_circ_0022007|0|600	0.636122	0.832394	6.21543	0.0132517	0.0328961
hsa_circ_0002228|circRNA|hsa_circ_0002228|hsa_circ_0002228|hsa_circ_0002228|0|600	0.635884	2.43392	9.27341	0.00255026	0.00925323
hsa_circ_0000827|circRNA|hsa_circ_0000827|hsa_circ_0000827|hsa_circ_0000827|0|600	0.635821	3.33512	13.9613	0.000226873	0.00148778
hsa_circ_0027460|circRNA|hsa_circ_0027460|hsa_circ_0027460|hsa_circ_0027460|0|600	0.635753	2.22493	7.18358	0.00780082	0.0218491
hsa_circ_0071033|circRNA|hsa_circ_0071033|hsa_circ_0071033|hsa_circ_0071033|0|600	0.635748	2.19312	8.95681	0.00301515	0.0104659
ENSG00000235531.9|lncRNA|MSC-AS1|ENSG00000235531.9|ENSG00000235531.9|0|6284	0.635716	5.04859	10.8364	0.00112517	0.00492788
ENSG00000168216.10|mRNA|LMBRD1|ENSG00000168216.10|ENSG00000168216.10|0|2402	0.635538	6.6943	16.1548	7.53993e-05	0.000656125
hsa_circ_0054130|circRNA|hsa_circ_0054130|hsa_circ_0054130|hsa_circ_0054130|0|600	0.635413	2.65235	8.01965	0.00496874	0.0153789
hsa_circ_0056429|circRNA|hsa_circ_0056429|hsa_circ_0056429|hsa_circ_0056429|0|600	0.635357	1.35371	7.99735	0.00502853	0.0155278
ENSG00000163092.19|mRNA|XIRP2|ENSG00000163092.19|ENSG00000163092.19|0|13031	0.635329	4.37697	9.57821	0.0021718	0.00814374
hsa_circ_0039365|circRNA|hsa_circ_0039365|hsa_circ_0039365|hsa_circ_0039365|0|600	0.635111	3.35525	7.92043	0.00524046	0.0160112
ENSG00000197563.10|mRNA|PIGN|ENSG00000197563.10|ENSG00000197563.10|0|19003	0.635039	7.20933	11.6072	0.000755025	0.00363735
hsa_circ_0002607|circRNA|hsa_circ_0002607|hsa_circ_0002607|hsa_circ_0002607|0|600	0.634998	1.33661	7.75179	0.00573783	0.0172247
ENSG00000273117.1|lncRNA|AC144652.1|ENSG00000273117.1|ENSG00000273117.1|0|1624	0.634924	2.46375	8.09833	0.00476355	0.0149244
ENSG00000136231.13|mRNA|IGF2BP3|ENSG00000136231.13|ENSG00000136231.13|0|8511	0.634834	9.07087	8.23037	0.00443852	0.0141393
ENSG00000269028.3|mRNA|MTRNR2L12|ENSG00000269028.3|ENSG00000269028.3|0|1049	0.634809	4.22027	3.80486	0.0521185	0.0966261
hsa_circ_0000483|circRNA|hsa_circ_0000483|hsa_circ_0000483|hsa_circ_0000483|0|600	0.634614	2.60998	9.8804	0.00185303	0.00721717
ENSG00000198682.12|mRNA|PAPSS2|ENSG00000198682.12|ENSG00000198682.12|0|4083	0.634431	5.28292	15.6573	9.66597e-05	0.000787854
hsa_circ_0002756|circRNA|hsa_circ_0002756|hsa_circ_0002756|hsa_circ_0002756|0|600	0.634414	1.85412	8.08842	0.00478891	0.0149804
ENSG00000072110.13|mRNA|ACTN1|ENSG00000072110.13|ENSG00000072110.13|0|10626	0.63437	10.722	10.5291	0.00132015	0.0055316
ENSG00000135605.12|mRNA|TEC|ENSG00000135605.12|ENSG00000135605.12|0|4030	0.634325	7.43567	10.7525	0.00117528	0.00509142
ENSG00000183785.14|mRNA|TUBA8|ENSG00000183785.14|ENSG00000183785.14|0|3641	0.634203	7.55739	10.1297	0.00162624	0.00650797
hsa_circ_0007364|circRNA|hsa_circ_0007364|hsa_circ_0007364|hsa_circ_0007364|0|600	0.634177	4.10727	11.2914	0.00088877	0.00412532
hsa_circ_0000992|circRNA|hsa_circ_0000992|hsa_circ_0000992|hsa_circ_0000992|0|600	0.633891	4.38163	9.81554	0.00191716	0.00740612
ENSG00000180398.11|mRNA|MCFD2|ENSG00000180398.11|ENSG00000180398.11|0|5994	0.633566	5.73713	19.0062	1.8422e-05	0.000226946
hsa_circ_0019007|circRNA|hsa_circ_0019007|hsa_circ_0019007|hsa_circ_0019007|0|600	0.633476	1.30505	7.29742	0.0073337	0.020818
hsa_circ_0080835|circRNA|hsa_circ_0080835|hsa_circ_0080835|hsa_circ_0080835|0|600	0.633458	4.22155	9.14419	0.00273045	0.00972133
ENSG00000066185.12|mRNA|ZMYND12|ENSG00000066185.12|ENSG00000066185.12|0|2195	0.63335	4.27766	7.40121	0.0069329	0.0199476
hsa_circ_0069607|circRNA|hsa_circ_0069607|hsa_circ_0069607|hsa_circ_0069607|0|600	0.633119	2.88031	8.93352	0.0030526	0.0105592
hsa_circ_0058480|circRNA|hsa_circ_0058480|hsa_circ_0058480|hsa_circ_0058480|0|600	0.633059	1.0266	7.05866	0.00834878	0.0229741
hsa_circ_0060602|circRNA|hsa_circ_0060602|hsa_circ_0060602|hsa_circ_0060602|0|600	0.632992	1.48298	7.14118	0.00798252	0.0222351
hsa_circ_0007112|circRNA|hsa_circ_0007112|hsa_circ_0007112|hsa_circ_0007112|0|600	0.632847	2.23751	8.70225	0.0034513	0.0115964
hsa_circ_0047483|circRNA|hsa_circ_0047483|hsa_circ_0047483|hsa_circ_0047483|0|600	0.632669	2.00569	7.72105	0.0058336	0.0174178
hsa_circ_0088389|circRNA|hsa_circ_0088389|hsa_circ_0088389|hsa_circ_0088389|0|600	0.632668	1.21223	7.70773	0.00587558	0.0175091
ENSG00000103942.12|mRNA|HOMER2|ENSG00000103942.12|ENSG00000103942.12|0|14685	0.632643	7.69648	9.607	0.00213915	0.00806102
ENSG00000100243.20|mRNA|CYB5R3|ENSG00000100243.20|ENSG00000100243.20|0|5973	0.632545	8.96284	12.7029	0.00043021	0.00240553
ENSG00000041353.9|mRNA|RAB27B|ENSG00000041353.9|ENSG00000041353.9|0|7432	0.632535	9.55258	8.04907	0.00489099	0.0152161
ENSG00000163681.14|mRNA|SLMAP|ENSG00000163681.14|ENSG00000163681.14|0|14147	0.632462	8.6104	13.9365	0.000229744	0.00150281
ENSG00000124588.19|mRNA|NQO2|ENSG00000124588.19|ENSG00000124588.19|0|11558	0.632382	7.44672	12.3586	0.000513108	0.00273396
hsa_circ_0071430|circRNA|hsa_circ_0071430|hsa_circ_0071430|hsa_circ_0071430|0|600	0.632087	1.4391	7.92225	0.00523535	0.015998
hsa_circ_0035051|circRNA|hsa_circ_0035051|hsa_circ_0035051|hsa_circ_0035051|0|600	0.631964	5.5991	11.2555	0.00090544	0.00417936
hsa_circ_0007101|circRNA|hsa_circ_0007101|hsa_circ_0007101|hsa_circ_0007101|0|600	0.631824	1.65592	8.38318	0.00409059	0.0132662
hsa_circ_0058051|circRNA|hsa_circ_0058051|hsa_circ_0058051|hsa_circ_0058051|0|600	0.6317	3.06189	9.09255	0.00280606	0.00991792
hsa_circ_0058494|circRNA|hsa_circ_0058494|hsa_circ_0058494|hsa_circ_0058494|0|600	0.631631	1.97357	8.72752	0.00340526	0.0114707
hsa_circ_0085045|circRNA|hsa_circ_0085045|hsa_circ_0085045|hsa_circ_0085045|0|600	0.631432	2.74156	8.5603	0.00372202	0.0123213
hsa_circ_0001519|circRNA|hsa_circ_0001519|hsa_circ_0001519|hsa_circ_0001519|0|600	0.631421	3.66625	8.81109	0.00325742	0.0110774
hsa_circ_0086726|circRNA|hsa_circ_0086726|hsa_circ_0086726|hsa_circ_0086726|0|600	0.631382	2.10561	7.98456	0.00506315	0.015609
hsa_circ_0030070|circRNA|hsa_circ_0030070|hsa_circ_0030070|hsa_circ_0030070|0|600	0.630972	1.17739	6.2227	0.0131987	0.0328017
hsa_circ_0038054|circRNA|hsa_circ_0038054|hsa_circ_0038054|hsa_circ_0038054|0|560	0.630756	1.83201	9.36234	0.00243336	0.0089232
ENSG00000186318.16|mRNA|BACE1|ENSG00000186318.16|ENSG00000186318.16|0|7190	0.630703	2.26339	7.1029	0.00815034	0.0225502
hsa_circ_0070562|circRNA|hsa_circ_0070562|hsa_circ_0070562|hsa_circ_0070562|0|600	0.630615	3.21849	10.2293	0.00154366	0.00624764
ENSG00000105971.14|mRNA|CAV2|ENSG00000105971.14|ENSG00000105971.14|0|6926	0.630579	3.98589	12.1247	0.000578515	0.0029846
ENSG00000253796.1|lncRNA|AC104248.1|ENSG00000253796.1|ENSG00000253796.1|0|890	0.63056	2.66288	6.99173	0.00865852	0.0235977
ENSG00000108846.15|mRNA|ABCC3|ENSG00000108846.15|ENSG00000108846.15|0|9614	0.630536	8.61568	6.87121	0.00924644	0.0248177
ENSG00000127831.10|mRNA|VIL1|ENSG00000127831.10|ENSG00000127831.10|0|6920	0.630435	7.00912	7.47937	0.00664599	0.0193087
ENSG00000153162.8|mRNA|BMP6|ENSG00000153162.8|ENSG00000153162.8|0|2780	0.630343	6.78197	8.11074	0.004732	0.0148494
hsa_circ_0061750|circRNA|hsa_circ_0061750|hsa_circ_0061750|hsa_circ_0061750|0|426	0.629963	1.62682	8.30924	0.00425531	0.0136869
ENSG00000100994.11|mRNA|PYGB|ENSG00000100994.11|ENSG00000100994.11|0|4474	0.629811	7.88794	10.6325	0.00125096	0.0053222
ENSG00000106868.16|mRNA|SUSD1|ENSG00000106868.16|ENSG00000106868.16|0|4183	0.629696	9.61989	10.9592	0.00105564	0.00470183
ENSG00000160588.9|mRNA|MPZL3|ENSG00000160588.9|ENSG00000160588.9|0|3968	0.629543	5.59628	8.94958	0.00302672	0.0104921
hsa_circ_0067026|circRNA|hsa_circ_0067026|hsa_circ_0067026|hsa_circ_0067026|0|586	0.629451	1.13143	6.3363	0.0123972	0.0312595
hsa_circ_0005839|circRNA|hsa_circ_0005839|hsa_circ_0005839|hsa_circ_0005839|0|600	0.629202	1.91887	7.84866	0.00544651	0.0165017
hsa_circ_0085137|circRNA|hsa_circ_0085137|hsa_circ_0085137|hsa_circ_0085137|0|600	0.629195	1.74112	6.91635	0.00902157	0.0243815
hsa_circ_0036989|circRNA|hsa_circ_0036989|hsa_circ_0036989|hsa_circ_0036989|0|600	0.629165	1.24077	7.56964	0.00632975	0.0185575
ENSG00000068796.16|mRNA|KIF2A|ENSG00000068796.16|ENSG00000068796.16|0|4774	0.629105	12.0577	9.16915	0.00269466	0.0096421
hsa_circ_0040904|circRNA|hsa_circ_0040904|hsa_circ_0040904|hsa_circ_0040904|0|600	0.628888	3.35382	7.80796	0.00556702	0.0167979
ENSG00000236744.2|lncRNA|AC016822.1|ENSG00000236744.2|ENSG00000236744.2|0|439	0.628761	2.374	5.37503	0.0211596	0.0473815
ENSG00000112096.16|mRNA|SOD2|ENSG00000112096.16|ENSG00000112096.16|0|18985	0.62859	10.3327	16.8856	5.24198e-05	0.000500006
ENSG00000074370.17|mRNA|ATP2A3|ENSG00000074370.17|ENSG00000074370.17|0|6893	0.628413	8.43154	8.39093	0.0040737	0.0132375
ENSG00000101290.13|mRNA|CDS2|ENSG00000101290.13|ENSG00000101290.13|0|11893	0.628386	6.2522	12.9265	0.0003838	0.00221048
ENSG00000248636.6|lncRNA|AC002070.1|ENSG00000248636.6|ENSG00000248636.6|0|1013	0.628232	4.06325	9.09629	0.0028005	0.00991058
ENSG00000100592.15|mRNA|DAAM1|ENSG00000100592.15|ENSG00000100592.15|0|10712	0.628197	9.1159	12.0848	0.000590466	0.00303168
ENSG00000165169.10|mRNA|DYNLT3|ENSG00000165169.10|ENSG00000165169.10|0|3186	0.628073	5.65205	16.9733	5.01882e-05	0.000482876
hsa_circ_0088050|circRNA|hsa_circ_0088050|hsa_circ_0088050|hsa_circ_0088050|0|600	0.627991	1.22743	7.21692	0.00766094	0.021542
ENSG00000103404.14|mRNA|USP31|ENSG00000103404.14|ENSG00000103404.14|0|12017	0.62794	5.67512	12.9338	0.000382386	0.00220427
hsa_circ_0035220|circRNA|hsa_circ_0035220|hsa_circ_0035220|hsa_circ_0035220|0|600	0.627856	1.09746	6.41512	0.0118709	0.0302652
hsa_circ_0004477|circRNA|hsa_circ_0004477|hsa_circ_0004477|hsa_circ_0004477|0|600	0.62784	1.14881	7.95723	0.00513797	0.0157754
ENSG00000276141.4|pseudogene|WHAMMP3|ENSG00000276141.4|ENSG00000276141.4|0|7269	0.627829	8.72765	9.3981	0.00238789	0.00878718
ENSG00000108387.14|mRNA|SEPT4|ENSG00000108387.14|ENSG00000108387.14|0|8012	0.627822	5.9125	10.9245	0.00107486	0.00476825
ENSG00000115318.11|mRNA|LOXL3|ENSG00000115318.11|ENSG00000115318.11|0|4363	0.627701	4.0007	6.91358	0.00903519	0.0244023
hsa_circ_0001023|circRNA|hsa_circ_0001023|hsa_circ_0001023|hsa_circ_0001023|0|600	0.62763	2.57012	8.441	0.00396634	0.0129583
ENSG00000153064.11|mRNA|BANK1|ENSG00000153064.11|ENSG00000153064.11|0|6144	0.627614	9.15632	17.7321	3.44763e-05	0.000363825
ENSG00000047648.21|mRNA|ARHGAP6|ENSG00000047648.21|ENSG00000047648.21|0|7885	0.627569	8.00079	8.57138	0.00370014	0.0122681
ENSG00000104164.10|mRNA|BLOC1S6|ENSG00000104164.10|ENSG00000104164.10|0|6812	0.627306	8.32151	13.3396	0.000310989	0.00188359
hsa_circ_0037886|circRNA|hsa_circ_0037886|hsa_circ_0037886|hsa_circ_0037886|0|600	0.627274	1.50898	8.29728	0.0042826	0.0137524
hsa_circ_0070960|circRNA|hsa_circ_0070960|hsa_circ_0070960|hsa_circ_0070960|0|600	0.627233	5.50819	13.6559	0.000264837	0.00166893
ENSG00000114541.14|mRNA|FRMD4B|ENSG00000114541.14|ENSG00000114541.14|0|9993	0.627008	8.47624	11.2072	0.000928347	0.00426535
hsa_circ_0008813|circRNA|hsa_circ_0008813|hsa_circ_0008813|hsa_circ_0008813|0|600	0.626943	1.24866	7.45624	0.00672961	0.0194888
hsa_circ_0008280|circRNA|hsa_circ_0008280|hsa_circ_0008280|hsa_circ_0008280|0|600	0.626821	1.91188	7.6889	0.00593548	0.0176559
hsa_circ_0042093|circRNA|hsa_circ_0042093|hsa_circ_0042093|hsa_circ_0042093|0|600	0.626707	1.33568	7.6666	0.00600723	0.0178324
ENSG00000152952.11|mRNA|PLOD2|ENSG00000152952.11|ENSG00000152952.11|0|7646	0.626474	7.38505	10.8831	0.00109821	0.00484383
ENSG00000186314.11|mRNA|PRELID2|ENSG00000186314.11|ENSG00000186314.11|0|5375	0.626344	6.1006	12.7533	0.000419291	0.00236036
hsa_circ_0053593|circRNA|hsa_circ_0053593|hsa_circ_0053593|hsa_circ_0053593|0|600	0.626212	1.20578	8.12418	0.00469805	0.0147656
hsa_circ_0049861|circRNA|hsa_circ_0049861|hsa_circ_0049861|hsa_circ_0049861|0|600	0.625972	2.96065	12.6225	0.000448255	0.00247962
hsa_circ_0091768|circRNA|hsa_circ_0091768|hsa_circ_0091768|hsa_circ_0091768|0|600	0.625873	1.79666	8.08282	0.0048033	0.0150089
ENSG00000223553.6|pseudogene|SMPD4P1|ENSG00000223553.6|ENSG00000223553.6|0|3971	0.625692	3.28647	3.1264	0.0781411	0.133917
ENSG00000119636.15|mRNA|BBOF1|ENSG00000119636.15|ENSG00000119636.15|0|4620	0.625597	7.05835	15.9178	8.48622e-05	0.000714771
ENSG00000081181.7|mRNA|ARG2|ENSG00000081181.7|ENSG00000081181.7|0|2418	0.625234	5.50388	8.31966	0.00423171	0.0136285
ENSG00000120690.15|mRNA|ELF1|ENSG00000120690.15|ENSG00000120690.15|0|4335	0.624944	9.50743	17.3775	4.10818e-05	0.000414454
ENSG00000180190.11|mRNA|TDRP|ENSG00000180190.11|ENSG00000180190.11|0|3613	0.624779	5.77204	9.83008	0.00190259	0.00736552
ENSG00000084731.14|mRNA|KIF3C|ENSG00000084731.14|ENSG00000084731.14|0|6403	0.624596	5.29203	8.39651	0.0040616	0.013213
hsa_circ_0052765|circRNA|hsa_circ_0052765|hsa_circ_0052765|hsa_circ_0052765|0|600	0.624436	1.32828	7.02029	0.00852494	0.0233237
ENSG00000205930.8|lncRNA|C21orf62-AS1|ENSG00000205930.8|ENSG00000205930.8|0|3504	0.624274	2.9754	10.5158	0.00132933	0.00555371
hsa_circ_0036374|circRNA|hsa_circ_0036374|hsa_circ_0036374|hsa_circ_0036374|0|600	0.624249	3.65417	8.92216	0.00307104	0.0106058
ENSG00000266356.1|pseudogene|AC090615.1|ENSG00000266356.1|ENSG00000266356.1|0|154	0.624114	4.41811	7.61874	0.00616428	0.0181605
hsa_circ_0006478|circRNA|hsa_circ_0006478|hsa_circ_0006478|hsa_circ_0006478|0|600	0.624071	1.93334	7.66324	0.00601812	0.0178565
ENSG00000100678.18|mRNA|SLC8A3|ENSG00000100678.18|ENSG00000100678.18|0|8444	0.624	4.32172	8.08812	0.00478968	0.0149804
hsa_circ_0004496|circRNA|hsa_circ_0004496|hsa_circ_0004496|hsa_circ_0004496|0|600	0.623953	3.04261	7.37036	0.00704961	0.0202018
ENSG00000142794.18|mRNA|NBPF3|ENSG00000142794.18|ENSG00000142794.18|0|6812	0.623935	4.05532	10.9664	0.0010517	0.00468846
hsa_circ_0016752|circRNA|hsa_circ_0016752|hsa_circ_0016752|hsa_circ_0016752|0|600	0.623899	1.86377	9.63056	0.00211282	0.00797957
ENSG00000081189.15|mRNA|MEF2C|ENSG00000081189.15|ENSG00000081189.15|0|11755	0.623799	8.64932	23.5785	2.0132e-06	4.17828e-05
hsa_circ_0007528|circRNA|hsa_circ_0007528|hsa_circ_0007528|hsa_circ_0007528|0|600	0.623648	2.89873	8.41508	0.00402154	0.0131062
ENSG00000225484.6|lncRNA|NUTM2B-AS1|ENSG00000225484.6|ENSG00000225484.6|0|14755	0.623543	5.80253	15.1941	0.000121904	0.000937547
hsa_circ_0007547|circRNA|hsa_circ_0007547|hsa_circ_0007547|hsa_circ_0007547|0|600	0.623407	1.81047	8.45189	0.00394337	0.0128999
ENSG00000144057.15|mRNA|ST6GAL2|ENSG00000144057.15|ENSG00000144057.15|0|7708	0.623319	5.99733	7.73621	0.00578616	0.0173358
ENSG00000155975.9|mRNA|VPS37A|ENSG00000155975.9|ENSG00000155975.9|0|6784	0.623274	7.35752	19.8578	1.21481e-05	0.000168132
hsa_circ_0008901|circRNA|hsa_circ_0008901|hsa_circ_0008901|hsa_circ_0008901|0|600	0.623223	5.09839	11.0373	0.00101374	0.00456065
ENSG00000255054.3|mRNA|AL020996.2|ENSG00000255054.3|ENSG00000255054.3|0|792	0.622984	6.47869	13.5697	0.000276678	0.00172505
hsa_circ_0016599|circRNA|hsa_circ_0016599|hsa_circ_0016599|hsa_circ_0016599|0|600	0.622952	2.59764	6.86913	0.00925695	0.0248325
hsa_circ_0088048|circRNA|hsa_circ_0088048|hsa_circ_0088048|hsa_circ_0088048|0|600	0.622819	1.55859	7.20234	0.0077218	0.0216612
hsa_circ_0067029|circRNA|hsa_circ_0067029|hsa_circ_0067029|hsa_circ_0067029|0|328	0.622707	2.93868	6.2868	0.0127401	0.0319022
ENSG00000198478.7|mRNA|SH3BGRL2|ENSG00000198478.7|ENSG00000198478.7|0|4653	0.622652	10.223	9.48006	0.00228697	0.00848151
ENSG00000068781.21|mRNA|STON1-GTF2A1L|ENSG00000068781.21|ENSG00000068781.21|0|4294	0.622579	5.39688	9.66582	0.00207401	0.00785233
ENSG00000174456.13|mRNA|C12orf76|ENSG00000174456.13|ENSG00000174456.13|0|7052	0.622555	5.61732	9.69286	0.00204474	0.00776085
hsa_circ_0081819|circRNA|hsa_circ_0081819|hsa_circ_0081819|hsa_circ_0081819|0|600	0.622478	2.73479	11.1338	0.000964325	0.0043892
ENSG00000176659.7|lncRNA|C20orf197|ENSG00000176659.7|ENSG00000176659.7|0|2732	0.622248	2.37951	9.01856	0.00291813	0.0102181
hsa_circ_0009164|circRNA|hsa_circ_0009164|hsa_circ_0009164|hsa_circ_0009164|0|600	0.622178	0.951683	6.25225	0.0129851	0.0323695
ENSG00000133317.14|mRNA|LGALS12|ENSG00000133317.14|ENSG00000133317.14|0|2270	0.622125	6.00696	9.9976	0.00174263	0.00687462
hsa_circ_0010458|circRNA|hsa_circ_0010458|hsa_circ_0010458|hsa_circ_0010458|0|600	0.622099	1.7629	7.36675	0.00706341	0.0202268
ENSG00000143995.19|mRNA|MEIS1|ENSG00000143995.19|ENSG00000143995.19|0|10934	0.622004	8.32109	7.94685	0.00516666	0.0158358
hsa_circ_0066279|circRNA|hsa_circ_0066279|hsa_circ_0066279|hsa_circ_0066279|0|600	0.621967	2.11589	7.32454	0.00722674	0.0205849
ENSG00000153707.16|mRNA|PTPRD|ENSG00000153707.16|ENSG00000153707.16|0|11165	0.621875	2.93232	8.71424	0.00342937	0.0115402
ENSG00000187699.10|mRNA|C2orf88|ENSG00000187699.10|ENSG00000187699.10|0|5997	0.621804	8.02308	8.81858	0.0032445	0.0110507
ENSG00000151690.14|mRNA|MFSD6|ENSG00000151690.14|ENSG00000151690.14|0|6031	0.621531	6.19361	13.7663	0.000250429	0.00160398
ENSG00000072422.16|mRNA|RHOBTB1|ENSG00000072422.16|ENSG00000072422.16|0|4841	0.621485	7.19792	9.44728	0.0023268	0.00860681
hsa_circ_0008853|circRNA|hsa_circ_0008853|hsa_circ_0008853|hsa_circ_0008853|0|600	0.621362	6.08304	10.7762	0.00116088	0.00504441
ENSG00000204136.10|pseudogene|GGTA1P|ENSG00000204136.10|ENSG00000204136.10|0|4501	0.621299	9.25335	11.4302	0.000827244	0.00390425
ENSG00000173083.14|mRNA|HPSE|ENSG00000173083.14|ENSG00000173083.14|0|4721	0.62129	5.81281	7.31819	0.00725165	0.0206462
hsa_circ_0006189|circRNA|hsa_circ_0006189|hsa_circ_0006189|hsa_circ_0006189|0|600	0.621218	2.8895	7.98092	0.00507306	0.0156246
hsa_circ_0002541|circRNA|hsa_circ_0002541|hsa_circ_0002541|hsa_circ_0002541|0|540	0.621149	1.06777	6.59994	0.0107253	0.0278645
hsa_circ_0001478|circRNA|hsa_circ_0001478|hsa_circ_0001478|hsa_circ_0001478|0|600	0.621064	1.52586	8.64557	0.00355689	0.0118971
ENSG00000186976.14|mRNA|EFCAB6|ENSG00000186976.14|ENSG00000186976.14|0|8557	0.621056	3.51145	9.11805	0.00276846	0.00983031
ENSG00000185989.10|mRNA|RASA3|ENSG00000185989.10|ENSG00000185989.10|0|4763	0.621026	9.20257	16.0554	7.92304e-05	0.000681143
ENSG00000147394.18|mRNA|ZNF185|ENSG00000147394.18|ENSG00000147394.18|0|4812	0.620952	9.6703	7.62475	0.00614433	0.0181365
hsa_circ_0035209|circRNA|hsa_circ_0035209|hsa_circ_0035209|hsa_circ_0035209|0|552	0.620768	1.45247	8.10494	0.00474672	0.0148902
ENSG00000104341.16|mRNA|LAPTM4B|ENSG00000104341.16|ENSG00000104341.16|0|3197	0.62073	5.36914	8.03717	0.00492228	0.0152801
ENSG00000102245.7|mRNA|CD40LG|ENSG00000102245.7|ENSG00000102245.7|0|1817	0.620667	4.67181	12.7955	0.00041034	0.00231717
hsa_circ_0006654|circRNA|hsa_circ_0006654|hsa_circ_0006654|hsa_circ_0006654|0|600	0.620604	1.43572	8.06879	0.00483956	0.0150962
ENSG00000246334.2|lncRNA|PRR7-AS1|ENSG00000246334.2|ENSG00000246334.2|0|1701	0.620506	2.41109	7.51243	0.00652833	0.0190178
ENSG00000177694.15|mRNA|NAALADL2|ENSG00000177694.15|ENSG00000177694.15|0|13592	0.620475	4.38396	9.43841	0.0023377	0.00862953
ENSG00000071205.11|mRNA|ARHGAP10|ENSG00000071205.11|ENSG00000071205.11|0|10759	0.620328	9.30411	10.7858	0.00115514	0.00502381
ENSG00000198924.7|mRNA|DCLRE1A|ENSG00000198924.7|ENSG00000198924.7|0|4600	0.620322	5.16127	8.45142	0.00394436	0.012901
hsa_circ_0030595|circRNA|hsa_circ_0030595|hsa_circ_0030595|hsa_circ_0030595|0|364	0.620238	2.38692	7.5402	0.00643115	0.018805
hsa_circ_0068137|circRNA|hsa_circ_0068137|hsa_circ_0068137|hsa_circ_0068137|0|234	0.619942	1.03462	6.64332	0.0104733	0.0273918
ENSG00000122778.9|mRNA|KIAA1549|ENSG00000122778.9|ENSG00000122778.9|0|12427	0.619889	2.53363	7.87813	0.00536093	0.0163093
hsa_circ_0088377|circRNA|hsa_circ_0088377|hsa_circ_0088377|hsa_circ_0088377|0|600	0.619777	2.38734	8.95056	0.00302515	0.0104897
hsa_circ_0001325|circRNA|hsa_circ_0001325|hsa_circ_0001325|hsa_circ_0001325|0|600	0.619721	3.09184	11.3795	0.000849204	0.00397871
ENSG00000255479.1|lncRNA|AP001189.6|ENSG00000255479.1|ENSG00000255479.1|0|831	0.619601	2.59805	7.39055	0.006973	0.020037
ENSG00000034713.7|mRNA|GABARAPL2|ENSG00000034713.7|ENSG00000034713.7|0|3034	0.6196	8.71058	23.1396	2.48429e-06	4.93517e-05
ENSG00000236304.1|lncRNA|AP001189.1|ENSG00000236304.1|ENSG00000236304.1|0|1426	0.619587	9.8648	8.22788	0.00444444	0.0141556
ENSG00000165288.10|mRNA|BRWD3|ENSG00000165288.10|ENSG00000165288.10|0|12694	0.619582	8.16518	20.0419	1.11052e-05	0.000156977
hsa_circ_0019005|circRNA|hsa_circ_0019005|hsa_circ_0019005|hsa_circ_0019005|0|600	0.61956	2.10024	9.41351	0.00236858	0.00872579
ENSG00000254717.2|pseudogene|GLYATL1P2|ENSG00000254717.2|ENSG00000254717.2|0|1161	0.619546	3.74564	7.86448	0.00540039	0.0164038
hsa_circ_0009158|circRNA|hsa_circ_0009158|hsa_circ_0009158|hsa_circ_0009158|0|600	0.619474	2.82347	8.35017	0.0041633	0.0134516
ENSG00000005249.12|mRNA|PRKAR2B|ENSG00000005249.12|ENSG00000005249.12|0|4318	0.619163	11.4053	8.11706	0.004716	0.0148174
hsa_circ_0044226|circRNA|hsa_circ_0044226|hsa_circ_0044226|hsa_circ_0044226|0|600	0.619037	1.36885	8.08286	0.0048032	0.0150089
ENSG00000102119.10|mRNA|EMD|ENSG00000102119.10|ENSG00000102119.10|0|2020	0.619027	6.52372	16.6607	5.86148e-05	0.000542493
hsa_circ_0055814|circRNA|hsa_circ_0055814|hsa_circ_0055814|hsa_circ_0055814|0|600	0.618708	3.22363	7.36517	0.00706945	0.0202412
ENSG00000078124.11|mRNA|ACER3|ENSG00000078124.11|ENSG00000078124.11|0|8442	0.61867	5.461	10.0993	0.00165226	0.00659483
hsa_circ_0053904|circRNA|hsa_circ_0053904|hsa_circ_0053904|hsa_circ_0053904|0|600	0.618637	3.74507	7.97408	0.00509171	0.0156744
hsa_circ_0005689|circRNA|hsa_circ_0005689|hsa_circ_0005689|hsa_circ_0005689|0|600	0.618629	1.08914	7.35137	0.00712247	0.0203521
hsa_circ_0065795|circRNA|hsa_circ_0065795|hsa_circ_0065795|hsa_circ_0065795|0|600	0.6186	2.04095	9.03541	0.0028922	0.0101469
ENSG00000227165.7|lncRNA|WDR11-AS1|ENSG00000227165.7|ENSG00000227165.7|0|4112	0.618598	7.68503	7.47275	0.00666982	0.019354
hsa_circ_0003166|circRNA|hsa_circ_0003166|hsa_circ_0003166|hsa_circ_0003166|0|566	0.618595	1.10893	6.16164	0.0136514	0.0336768
hsa_circ_0002186|circRNA|hsa_circ_0002186|hsa_circ_0002186|hsa_circ_0002186|0|600	0.618594	1.56499	8.45423	0.00393846	0.012888
hsa_circ_0068697|circRNA|hsa_circ_0068697|hsa_circ_0068697|hsa_circ_0068697|0|600	0.618119	1.94076	7.73621	0.00578615	0.0173358
ENSG00000259033.1|lncRNA|AL356804.1|ENSG00000259033.1|ENSG00000259033.1|0|448	0.617951	2.95076	4.86578	0.0282205	0.0594107
hsa_circ_0001358|circRNA|hsa_circ_0001358|hsa_circ_0001358|hsa_circ_0001358|0|600	0.617823	5.06043	13.2049	0.000333041	0.00198402
hsa_circ_0002177|circRNA|hsa_circ_0002177|hsa_circ_0002177|hsa_circ_0002177|0|600	0.6178	1.99208	8.22422	0.00445316	0.0141769
hsa_circ_0044232|circRNA|hsa_circ_0044232|hsa_circ_0044232|hsa_circ_0044232|0|600	0.617656	1.29472	7.37069	0.00704838	0.0202012
hsa_circ_0000798|circRNA|hsa_circ_0000798|hsa_circ_0000798|hsa_circ_0000798|0|600	0.617641	4.82288	17.2899	4.29014e-05	0.000428477
ENSG00000161013.16|mRNA|MGAT4B|ENSG00000161013.16|ENSG00000161013.16|0|5495	0.617435	8.19351	9.00196	0.0029439	0.0102812
hsa_circ_0057338|circRNA|hsa_circ_0057338|hsa_circ_0057338|hsa_circ_0057338|0|600	0.617361	3.06588	8.07315	0.00482827	0.0150699
ENSG00000150681.9|mRNA|RGS18|ENSG00000150681.9|ENSG00000150681.9|0|2806	0.617354	11.5852	8.04147	0.00491094	0.0152544
ENSG00000198155.5|pseudogene|ZNF876P|ENSG00000198155.5|ENSG00000198155.5|0|2804	0.617213	1.87904	8.84059	0.00320681	0.0109577
hsa_circ_0047555|circRNA|hsa_circ_0047555|hsa_circ_0047555|hsa_circ_0047555|0|410	0.617159	3.85763	9.00614	0.00293738	0.0102656
hsa_circ_0078200|circRNA|hsa_circ_0078200|hsa_circ_0078200|hsa_circ_0078200|0|600	0.616913	1.12355	7.02397	0.00850785	0.0232993
ENSG00000155099.7|mRNA|TMEM55A|ENSG00000155099.7|ENSG00000155099.7|0|3066	0.616715	8.15016	9.27082	0.00255375	0.0092625
ENSG00000067167.7|mRNA|TRAM1|ENSG00000067167.7|ENSG00000067167.7|0|3878	0.616436	9.34374	12.6399	0.000444304	0.00246099
hsa_circ_0030016|circRNA|hsa_circ_0030016|hsa_circ_0030016|hsa_circ_0030016|0|600	0.61628	1.29696	6.71691	0.0100598	0.0265471
hsa_circ_0025514|circRNA|hsa_circ_0025514|hsa_circ_0025514|hsa_circ_0025514|0|600	0.616157	2.18594	9.73882	0.00199596	0.00762488
ENSG00000141854.9|mRNA|MISP3|ENSG00000141854.9|ENSG00000141854.9|0|2354	0.616152	6.37974	7.47558	0.0066596	0.0193368
hsa_circ_0027234|circRNA|hsa_circ_0027234|hsa_circ_0027234|hsa_circ_0027234|0|342	0.616121	0.853883	6.29455	0.0126858	0.0317994
hsa_circ_0008981|circRNA|hsa_circ_0008981|hsa_circ_0008981|hsa_circ_0008981|0|496	0.615961	4.526	12.3707	0.000509933	0.0027242
hsa_circ_0052967|circRNA|hsa_circ_0052967|hsa_circ_0052967|hsa_circ_0052967|0|600	0.615933	2.31763	9.10807	0.00278312	0.00986656
hsa_circ_0054918|circRNA|hsa_circ_0054918|hsa_circ_0054918|hsa_circ_0054918|0|600	0.615808	2.57402	8.1295	0.00468469	0.0147399
hsa_circ_0015802|circRNA|hsa_circ_0015802|hsa_circ_0015802|hsa_circ_0015802|0|600	0.615502	1.76106	7.73329	0.00579527	0.0173579
hsa_circ_0030185|circRNA|hsa_circ_0030185|hsa_circ_0030185|hsa_circ_0030185|0|600	0.615293	0.914067	7.05813	0.00835117	0.0229775
ENSG00000224016.2|pseudogene|AC092681.1|ENSG00000224016.2|ENSG00000224016.2|0|291	0.615248	3.13975	9.35371	0.00244445	0.00894906
hsa_circ_0006856|circRNA|hsa_circ_0006856|hsa_circ_0006856|hsa_circ_0006856|0|600	0.615214	5.19446	8.4153	0.00402107	0.0131062
ENSG00000158769.17|mRNA|F11R|ENSG00000158769.17|ENSG00000158769.17|0|5066	0.615175	7.62243	9.21749	0.0026267	0.0094548
hsa_circ_0007778|circRNA|hsa_circ_0007778|hsa_circ_0007778|hsa_circ_0007778|0|600	0.615171	0.967305	6.39634	0.0119942	0.0304977
hsa_circ_0062654|circRNA|hsa_circ_0062654|hsa_circ_0062654|hsa_circ_0062654|0|600	0.61513	1.69215	7.35634	0.00710335	0.0203195
hsa_circ_0064022|circRNA|hsa_circ_0064022|hsa_circ_0064022|hsa_circ_0064022|0|600	0.615074	1.24228	6.03795	0.0146184	0.0355088
hsa_circ_0007798|circRNA|hsa_circ_0007798|hsa_circ_0007798|hsa_circ_0007798|0|600	0.615012	2.6978	8.43054	0.00398853	0.013022
hsa_circ_0017244|circRNA|hsa_circ_0017244|hsa_circ_0017244|hsa_circ_0017244|0|600	0.614846	1.99613	9.71274	0.00202349	0.00770201
ENSG00000198586.13|mRNA|TLK1|ENSG00000198586.13|ENSG00000198586.13|0|9405	0.614793	11.0931	10.1649	0.00159651	0.00641078
hsa_circ_0071106|circRNA|hsa_circ_0071106|hsa_circ_0071106|hsa_circ_0071106|0|600	0.614767	5.00917	9.72338	0.00201222	0.00767228
ENSG00000187653.11|pseudogene|TMSB4XP8|ENSG00000187653.11|ENSG00000187653.11|0|135	0.614716	2.04908	6.99865	0.00862595	0.023529
ENSG00000102893.15|mRNA|PHKB|ENSG00000102893.15|ENSG00000102893.15|0|11822	0.614681	9.213	12.6181	0.00044927	0.00248356
ENSG00000183914.14|mRNA|DNAH2|ENSG00000183914.14|ENSG00000183914.14|0|17231	0.614673	3.85493	7.1082	0.00812687	0.0224938
ENSG00000122545.18|mRNA|SEPT7|ENSG00000122545.18|ENSG00000122545.18|0|10906	0.614478	11.1136	16.3266	6.92127e-05	0.000615447
ENSG00000128578.9|mRNA|STRIP2|ENSG00000128578.9|ENSG00000128578.9|0|5876	0.61443	3.92534	8.73726	0.00338768	0.011423
ENSG00000091317.7|mRNA|CMTM6|ENSG00000091317.7|ENSG00000091317.7|0|4413	0.614377	6.62786	9.37464	0.00241762	0.0088704
hsa_circ_0001079|circRNA|hsa_circ_0001079|hsa_circ_0001079|hsa_circ_0001079|0|600	0.61434	4.83385	10.4978	0.00134188	0.00559559
ENSG00000122483.17|mRNA|CCDC18|ENSG00000122483.17|ENSG00000122483.17|0|5633	0.614054	8.31471	15.823	8.89756e-05	0.000742518
hsa_circ_0019296|circRNA|hsa_circ_0019296|hsa_circ_0019296|hsa_circ_0019296|0|600	0.613984	1.23619	5.37182	0.0211977	0.0474523
hsa_circ_0003638|circRNA|hsa_circ_0003638|hsa_circ_0003638|hsa_circ_0003638|0|600	0.61387	6.0773	8.03997	0.00491491	0.0152607
hsa_circ_0019540|circRNA|hsa_circ_0019540|hsa_circ_0019540|hsa_circ_0019540|0|436	0.613609	1.59288	6.67219	0.010309	0.0270509
ENSG00000119242.8|mRNA|CCDC92|ENSG00000119242.8|ENSG00000119242.8|0|8223	0.613525	8.35176	12.3648	0.000511483	0.00272914
ENSG00000250878.3|pseudogene|METTL21EP|ENSG00000250878.3|ENSG00000250878.3|0|2337	0.613398	4.8919	6.51777	0.0112198	0.0289419
hsa_circ_0061985|circRNA|hsa_circ_0061985|hsa_circ_0061985|hsa_circ_0061985|0|600	0.613251	1.80276	10.1782	0.0015855	0.00637555
ENSG00000235288.3|lncRNA|AC099329.1|ENSG00000235288.3|ENSG00000235288.3|0|1956	0.613215	8.15715	17.676	3.54443e-05	0.000372268
hsa_circ_0077236|circRNA|hsa_circ_0077236|hsa_circ_0077236|hsa_circ_0077236|0|600	0.613191	1.15884	7.10154	0.00815637	0.0225629
hsa_circ_0000698|circRNA|hsa_circ_0000698|hsa_circ_0000698|hsa_circ_0000698|0|600	0.613126	4.35789	8.18526	0.00454694	0.0144202
ENSG00000165028.11|mRNA|NIPSNAP3B|ENSG00000165028.11|ENSG00000165028.11|0|2178	0.613029	4.18526	11.0018	0.00103261	0.00462196
ENSG00000254659.2|lncRNA|AP002444.1|ENSG00000254659.2|ENSG00000254659.2|0|620	0.612818	3.46765	7.34639	0.00714169	0.0203953
hsa_circ_0084941|circRNA|hsa_circ_0084941|hsa_circ_0084941|hsa_circ_0084941|0|600	0.612698	1.81961	8.55411	0.00373431	0.0123497
hsa_circ_0028245|circRNA|hsa_circ_0028245|hsa_circ_0028245|hsa_circ_0028245|0|600	0.612693	2.3914	7.87579	0.00536766	0.0163248
ENSG00000164924.17|mRNA|YWHAZ|ENSG00000164924.17|ENSG00000164924.17|0|8555	0.612587	11.8621	14.1016	0.000211326	0.00141203
ENSG00000119953.12|mRNA|SMNDC1|ENSG00000119953.12|ENSG00000119953.12|0|5417	0.612576	6.15342	24.8692	1.08753e-06	2.71582e-05
hsa_circ_0072497|circRNA|hsa_circ_0072497|hsa_circ_0072497|hsa_circ_0072497|0|600	0.61244	1.26557	7.18749	0.00778428	0.0218097
hsa_circ_0035938|circRNA|hsa_circ_0035938|hsa_circ_0035938|hsa_circ_0035938|0|600	0.61241	3.03669	7.16495	0.00788014	0.0220156
ENSG00000105993.14|mRNA|DNAJB6|ENSG00000105993.14|ENSG00000105993.14|0|14981	0.612232	9.70951	14.5897	0.000165186	0.00118045
hsa_circ_0067680|circRNA|hsa_circ_0067680|hsa_circ_0067680|hsa_circ_0067680|0|600	0.612118	0.949744	6.43144	0.0117648	0.0300679
ENSG00000035403.17|mRNA|VCL|ENSG00000035403.17|ENSG00000035403.17|0|9992	0.611892	11.8168	8.06778	0.00484218	0.015102
hsa_circ_0001192|circRNA|hsa_circ_0001192|hsa_circ_0001192|hsa_circ_0001192|0|600	0.611729	1.76078	8.17326	0.00457622	0.01449
ENSG00000113758.13|mRNA|DBN1|ENSG00000113758.13|ENSG00000113758.13|0|5119	0.611609	7.7946	15.5556	0.000101705	0.000817285
ENSG00000240207.6|lncRNA|AC080013.1|ENSG00000240207.6|ENSG00000240207.6|0|4177	0.610956	3.09472	6.70667	0.0101163	0.0266644
ENSG00000180284.5|pseudogene|AL049610.1|ENSG00000180284.5|ENSG00000180284.5|0|372	0.610755	3.30136	6.21827	0.013231	0.0328714
hsa_circ_0079690|circRNA|hsa_circ_0079690|hsa_circ_0079690|hsa_circ_0079690|0|600	0.610552	0.974805	4.71135	0.0308186	0.0636113
hsa_circ_0008386|circRNA|hsa_circ_0008386|hsa_circ_0008386|hsa_circ_0008386|0|600	0.610466	4.53923	10.3228	0.00147014	0.00601476
hsa_circ_0001518|circRNA|hsa_circ_0001518|hsa_circ_0001518|hsa_circ_0001518|0|600	0.610426	2.82541	8.63236	0.00358197	0.0119509
hsa_circ_0068366|circRNA|hsa_circ_0068366|hsa_circ_0068366|hsa_circ_0068366|0|600	0.610422	1.89699	7.86679	0.00539367	0.0163864
hsa_circ_0008926|circRNA|hsa_circ_0008926|hsa_circ_0008926|hsa_circ_0008926|0|600	0.610314	0.900514	5.78892	0.0167867	0.039515
hsa_circ_0019079|circRNA|hsa_circ_0019079|hsa_circ_0019079|hsa_circ_0019079|0|600	0.610251	4.15278	11.136	0.000963237	0.00438525
hsa_circ_0091377|circRNA|hsa_circ_0091377|hsa_circ_0091377|hsa_circ_0091377|0|600	0.610176	0.925765	6.34421	0.0123433	0.031163
ENSG00000268081.1|lncRNA|AC123912.1|ENSG00000268081.1|ENSG00000268081.1|0|447	0.610117	3.17883	3.73746	0.0542302	0.0998359
ENSG00000166974.12|mRNA|MAPRE2|ENSG00000166974.12|ENSG00000166974.12|0|6180	0.610088	9.38709	12.3073	0.000526762	0.00278356
ENSG00000196459.13|mRNA|TRAPPC2|ENSG00000196459.13|ENSG00000196459.13|0|6107	0.610071	7.30805	10.3789	0.00142774	0.00587504
hsa_circ_0001852|circRNA|hsa_circ_0001852|hsa_circ_0001852|hsa_circ_0001852|0|600	0.609935	3.72726	10.7991	0.00114719	0.00499688
hsa_circ_0083738|circRNA|hsa_circ_0083738|hsa_circ_0083738|hsa_circ_0083738|0|600	0.609897	0.992082	6.3201	0.0125084	0.0314494
ENSG00000220804.8|pseudogene|LINC01881|ENSG00000220804.8|ENSG00000220804.8|0|1931	0.609839	6.93405	16.0388	7.98868e-05	0.000685308
hsa_circ_0053931|circRNA|hsa_circ_0053931|hsa_circ_0053931|hsa_circ_0053931|0|600	0.609805	1.21146	6.1271	0.0139145	0.0341654
ENSG00000159348.12|mRNA|CYB5R1|ENSG00000159348.12|ENSG00000159348.12|0|4504	0.609773	6.93757	10.0692	0.00167853	0.00666767
ENSG00000181061.13|mRNA|HIGD1A|ENSG00000181061.13|ENSG00000181061.13|0|1675	0.6096	8.12732	17.4552	3.95327e-05	0.000403314
ENSG00000220201.7|mRNA|ZGLP1|ENSG00000220201.7|ENSG00000220201.7|0|2431	0.609483	3.71172	8.39105	0.00407343	0.0132375
ENSG00000115159.15|mRNA|GPD2|ENSG00000115159.15|ENSG00000115159.15|0|7155	0.609478	7.11852	9.56159	0.00219088	0.00819986
hsa_circ_0042094|circRNA|hsa_circ_0042094|hsa_circ_0042094|hsa_circ_0042094|0|600	0.609464	1.04905	6.12284	0.0139474	0.0342249
ENSG00000258999.1|lncRNA|AL136040.1|ENSG00000258999.1|ENSG00000258999.1|0|601	0.60945	5.22195	7.15654	0.00791622	0.0220866
hsa_circ_0085609|circRNA|hsa_circ_0085609|hsa_circ_0085609|hsa_circ_0085609|0|600	0.609365	1.05056	6.66553	0.0103467	0.027116
ENSG00000168300.13|mRNA|PCMTD1|ENSG00000168300.13|ENSG00000168300.13|0|7323	0.609355	8.89592	15.1667	0.000123591	0.000946991
ENSG00000205133.11|mRNA|TRIQK|ENSG00000205133.11|ENSG00000205133.11|0|6724	0.609326	6.41311	10.9066	0.00108489	0.00479676
hsa_circ_0070260|circRNA|hsa_circ_0070260|hsa_circ_0070260|hsa_circ_0070260|0|600	0.609288	1.56154	7.62917	0.00612969	0.0181087
hsa_circ_0017447|circRNA|hsa_circ_0017447|hsa_circ_0017447|hsa_circ_0017447|0|600	0.609257	1.04451	5.62646	0.018379	0.0424074
hsa_circ_0005963|circRNA|hsa_circ_0005963|hsa_circ_0005963|hsa_circ_0005963|0|600	0.609184	1.00299	6.41178	0.0118927	0.0302899
ENSG00000004866.20|mRNA|ST7|ENSG00000004866.20|ENSG00000004866.20|0|6742	0.609044	6.7921	10.4371	0.00138504	0.0057453
ENSG00000206560.11|mRNA|ANKRD28|ENSG00000206560.11|ENSG00000206560.11|0|11276	0.609011	9.46039	7.64774	0.00606862	0.0179716
ENSG00000092531.9|mRNA|SNAP23|ENSG00000092531.9|ENSG00000092531.9|0|5900	0.608992	10.0602	12.5522	0.000464688	0.00254691
ENSG00000180354.15|mRNA|MTURN|ENSG00000180354.15|ENSG00000180354.15|0|6532	0.608744	8.96687	11.4514	0.000818215	0.00387172
ENSG00000274615.1|pseudogene|AC233968.1|ENSG00000274615.1|ENSG00000274615.1|0|1300	0.608666	2.77784	10.635	0.00124937	0.00531937
ENSG00000116288.12|mRNA|PARK7|ENSG00000116288.12|ENSG00000116288.12|0|2397	0.608594	8.23325	22.3133	3.69559e-06	6.78091e-05
hsa_circ_0025843|circRNA|hsa_circ_0025843|hsa_circ_0025843|hsa_circ_0025843|0|600	0.608565	4.19929	9.51331	0.00224726	0.00837667
hsa_circ_0075539|circRNA|hsa_circ_0075539|hsa_circ_0075539|hsa_circ_0075539|0|600	0.608387	3.07311	8.28554	0.00430954	0.0138256
ENSG00000233718.7|lncRNA|MYCNOS|ENSG00000233718.7|ENSG00000233718.7|0|2413	0.608325	2.20843	6.13857	0.0138266	0.0339879
ENSG00000006652.13|mRNA|IFRD1|ENSG00000006652.13|ENSG00000006652.13|0|7489	0.60829	7.66032	10.2114	0.0015582	0.00629497
ENSG00000128989.10|mRNA|ARPP19|ENSG00000128989.10|ENSG00000128989.10|0|6917	0.608201	8.07463	17.6278	3.62991e-05	0.000378258
hsa_circ_0053862|circRNA|hsa_circ_0053862|hsa_circ_0053862|hsa_circ_0053862|0|600	0.608018	2.59376	7.52698	0.00647722	0.0189038
hsa_circ_0005126|circRNA|hsa_circ_0005126|hsa_circ_0005126|hsa_circ_0005126|0|586	0.607882	1.15975	5.9566	0.0152928	0.0367711
hsa_circ_0071185|circRNA|hsa_circ_0071185|hsa_circ_0071185|hsa_circ_0071185|0|600	0.60788	3.66103	8.8225	0.00323775	0.0110388
hsa_circ_0031570|circRNA|hsa_circ_0031570|hsa_circ_0031570|hsa_circ_0031570|0|600	0.607747	1.21111	6.47539	0.011484	0.0294515
ENSG00000232725.1|lncRNA|U52111.1|ENSG00000232725.1|ENSG00000232725.1|0|1087	0.607706	2.30966	4.74841	0.030173	0.0625377
ENSG00000137942.16|mRNA|FNBP1L|ENSG00000137942.16|ENSG00000137942.16|0|5798	0.607592	7.22112	16.2142	7.3197e-05	0.000642568
hsa_circ_0007706|circRNA|hsa_circ_0007706|hsa_circ_0007706|hsa_circ_0007706|0|600	0.607542	1.38912	5.89733	0.0158045	0.0376968
hsa_circ_0027776|circRNA|hsa_circ_0027776|hsa_circ_0027776|hsa_circ_0027776|0|600	0.607517	1.10213	7.52566	0.00648185	0.0189117
hsa_circ_0035104|circRNA|hsa_circ_0035104|hsa_circ_0035104|hsa_circ_0035104|0|600	0.607471	1.06417	6.05917	0.0144475	0.0351539
ENSG00000079156.16|mRNA|OSBPL6|ENSG00000079156.16|ENSG00000079156.16|0|11486	0.607296	2.36294	7.35744	0.00709911	0.0203174
ENSG00000186409.14|mRNA|CCDC30|ENSG00000186409.14|ENSG00000186409.14|0|13504	0.607244	4.8601	15.3727	0.000111462	0.00087593
ENSG00000102409.9|mRNA|BEX4|ENSG00000102409.9|ENSG00000102409.9|0|1328	0.607192	6.59519	17.7292	3.45257e-05	0.000364154
ENSG00000125971.16|mRNA|DYNLRB1|ENSG00000125971.16|ENSG00000125971.16|0|2460	0.607192	9.69802	13.4074	0.000300455	0.00183478
ENSG00000258553.5|lncRNA|AL157911.1|ENSG00000258553.5|ENSG00000258553.5|0|572	0.606951	1.89756	7.15063	0.00794165	0.0221409
ENSG00000162994.15|mRNA|CLHC1|ENSG00000162994.15|ENSG00000162994.15|0|4398	0.606831	5.36857	9.57319	0.00217755	0.00816222
ENSG00000185630.18|mRNA|PBX1|ENSG00000185630.18|ENSG00000185630.18|0|21249	0.606736	7.46488	9.81806	0.00191463	0.0073992
hsa_circ_0001696|circRNA|hsa_circ_0001696|hsa_circ_0001696|hsa_circ_0001696|0|600	0.606733	3.54218	7.31745	0.00725454	0.0206467
ENSG00000134668.12|mRNA|SPOCD1|ENSG00000134668.12|ENSG00000134668.12|0|7085	0.606578	5.97291	7.02956	0.00848203	0.0232422
ENSG00000169621.9|mRNA|APLF|ENSG00000169621.9|ENSG00000169621.9|0|7135	0.606541	9.23272	11.5332	0.000784415	0.00374914
hsa_circ_0004127|circRNA|hsa_circ_0004127|hsa_circ_0004127|hsa_circ_0004127|0|600	0.606467	4.61146	11.0751	0.00099409	0.00449187
ENSG00000280571.1|mRNA|AC099329.3|ENSG00000280571.1|ENSG00000280571.1|0|602	0.606422	8.13245	17.6379	3.61187e-05	0.000377561
hsa_circ_0004804|circRNA|hsa_circ_0004804|hsa_circ_0004804|hsa_circ_0004804|0|600	0.606391	1.93395	7.05561	0.00836263	0.0229964
hsa_circ_0092013|circRNA|hsa_circ_0092013|hsa_circ_0092013|hsa_circ_0092013|0|600	0.606319	2.26526	6.88542	0.00917503	0.0246692
hsa_circ_0073378|circRNA|hsa_circ_0073378|hsa_circ_0073378|hsa_circ_0073378|0|600	0.606255	1.33485	6.16117	0.0136549	0.0336813
ENSG00000267561.2|mRNA|AC093155.3|ENSG00000267561.2|ENSG00000267561.2|0|2013	0.606244	4.69633	13.3616	0.000307527	0.0018683
ENSG00000133627.17|mRNA|ACTR3B|ENSG00000133627.17|ENSG00000133627.17|0|6024	0.606231	7.06103	11.3198	0.000875838	0.00407478
hsa_circ_0005131|circRNA|hsa_circ_0005131|hsa_circ_0005131|hsa_circ_0005131|0|600	0.606215	1.17395	7.18742	0.00778456	0.0218097
ENSG00000215193.12|mRNA|PEX26|ENSG00000215193.12|ENSG00000215193.12|0|20045	0.605913	7.59878	11.4207	0.000831334	0.00391707
ENSG00000155115.6|mRNA|GTF3C6|ENSG00000155115.6|ENSG00000155115.6|0|1067	0.605792	6.54363	18.7377	2.10152e-05	0.00024979
hsa_circ_0019170|circRNA|hsa_circ_0019170|hsa_circ_0019170|hsa_circ_0019170|0|600	0.605694	2.71988	9.75098	0.00198326	0.00758506
hsa_circ_0002723|circRNA|hsa_circ_0002723|hsa_circ_0002723|hsa_circ_0002723|0|600	0.605535	1.63259	7.41962	0.00686418	0.0197984
ENSG00000166340.15|mRNA|TPP1|ENSG00000166340.15|ENSG00000166340.15|0|4901	0.60553	8.24189	8.47651	0.00389195	0.0127694
hsa_circ_0042811|circRNA|hsa_circ_0042811|hsa_circ_0042811|hsa_circ_0042811|0|600	0.605501	1.01353	5.75109	0.0403917	0.0789815
hsa_circ_0079629|circRNA|hsa_circ_0079629|hsa_circ_0079629|hsa_circ_0079629|0|600	0.60541	1.32798	4.69446	0.0311176	0.0640827
hsa_circ_0057145|circRNA|hsa_circ_0057145|hsa_circ_0057145|hsa_circ_0057145|0|600	0.605305	1.64088	6.73975	0.00993487	0.026273
hsa_circ_0043816|circRNA|hsa_circ_0043816|hsa_circ_0043816|hsa_circ_0043816|0|600	0.605301	1.00049	6.98172	0.00870583	0.0237016
hsa_circ_0057029|circRNA|hsa_circ_0057029|hsa_circ_0057029|hsa_circ_0057029|0|600	0.605252	3.18227	7.60284	0.00621737	0.0182917
ENSG00000253394.5|lncRNA|LINC00534|ENSG00000253394.5|ENSG00000253394.5|0|1354	0.605085	6.19833	6.71651	0.010062	0.0265493
hsa_circ_0047891|circRNA|hsa_circ_0047891|hsa_circ_0047891|hsa_circ_0047891|0|600	0.605064	1.22996	6.68438	0.0102405	0.0269348
hsa_circ_0080346|circRNA|hsa_circ_0080346|hsa_circ_0080346|hsa_circ_0080346|0|196	0.605063	2.61463	6.41649	0.0118619	0.0302539
hsa_circ_0008314|circRNA|hsa_circ_0008314|hsa_circ_0008314|hsa_circ_0008314|0|600	0.604919	1.56633	7.04654	0.00840399	0.0230783
hsa_circ_0006383|circRNA|hsa_circ_0006383|hsa_circ_0006383|hsa_circ_0006383|0|600	0.604904	1.16533	7.66658	0.0060073	0.0178324
hsa_circ_0073068|circRNA|hsa_circ_0073068|hsa_circ_0073068|hsa_circ_0073068|0|600	0.604613	2.24308	9.1437	0.00273116	0.00972145
hsa_circ_0037010|circRNA|hsa_circ_0037010|hsa_circ_0037010|hsa_circ_0037010|0|600	0.604416	2.8859	7.40247	0.00692819	0.0199408
ENSG00000165244.6|mRNA|ZNF367|ENSG00000165244.6|ENSG00000165244.6|0|3646	0.604373	5.50643	10.4068	0.00140705	0.00581096
hsa_circ_0005644|circRNA|hsa_circ_0005644|hsa_circ_0005644|hsa_circ_0005644|0|600	0.604357	1.99691	7.61909	0.00616311	0.0181605
ENSG00000110218.8|mRNA|PANX1|ENSG00000110218.8|ENSG00000110218.8|0|2769	0.604312	5.68064	7.1585	0.00790779	0.0220712
hsa_circ_0003386|circRNA|hsa_circ_0003386|hsa_circ_0003386|hsa_circ_0003386|0|600	0.604278	1.11421	7.19274	0.00776211	0.0217621
hsa_circ_0008707|circRNA|hsa_circ_0008707|hsa_circ_0008707|hsa_circ_0008707|0|600	0.604211	1.28087	7.17999	0.00781606	0.0218733
hsa_circ_0002280|circRNA|hsa_circ_0002280|hsa_circ_0002280|hsa_circ_0002280|0|600	0.60395	1.96783	8.29884	0.00427902	0.0137458
hsa_circ_0006964|circRNA|hsa_circ_0006964|hsa_circ_0006964|hsa_circ_0006964|0|600	0.603797	1.19076	5.79657	0.0167154	0.0393937
hsa_circ_0047031|circRNA|hsa_circ_0047031|hsa_circ_0047031|hsa_circ_0047031|0|600	0.603461	1.02428	7.03799	0.0084432	0.0231644
ENSG00000204592.8|mRNA|HLA-E|ENSG00000204592.8|ENSG00000204592.8|0|2975	0.603458	10.755	12.5913	0.000455469	0.00251018
hsa_circ_0006696|circRNA|hsa_circ_0006696|hsa_circ_0006696|hsa_circ_0006696|0|534	0.603409	1.86469	9.25931	0.00256932	0.00930207
ENSG00000164989.16|mRNA|CCDC171|ENSG00000164989.16|ENSG00000164989.16|0|12153	0.603327	5.08319	12.2624	0.000539036	0.00282923
hsa_circ_0071510|circRNA|hsa_circ_0071510|hsa_circ_0071510|hsa_circ_0071510|0|600	0.603322	1.18684	6.02685	0.0147085	0.0356584
ENSG00000186088.15|mRNA|GSAP|ENSG00000186088.15|ENSG00000186088.15|0|9001	0.603304	9.02511	12.127	0.000577808	0.0029825
ENSG00000185842.15|mRNA|DNAH14|ENSG00000185842.15|ENSG00000185842.15|0|19693	0.603289	7.25092	9.76217	0.00197164	0.00755656
ENSG00000224063.5|lncRNA|AC007319.1|ENSG00000224063.5|ENSG00000224063.5|0|1472	0.603252	3.74571	8.16775	0.00458975	0.0145226
hsa_circ_0015438|circRNA|hsa_circ_0015438|hsa_circ_0015438|hsa_circ_0015438|0|600	0.602952	1.23161	6.27242	0.0128415	0.0320756
hsa_circ_0026228|circRNA|hsa_circ_0026228|hsa_circ_0026228|hsa_circ_0026228|0|600	0.60294	3.44934	9.1536	0.0027169	0.00969211
hsa_circ_0066278|circRNA|hsa_circ_0066278|hsa_circ_0066278|hsa_circ_0066278|0|600	0.602921	1.78688	6.6163	0.0106295	0.0276806
ENSG00000216937.13|mRNA|CCDC7|ENSG00000216937.13|ENSG00000216937.13|0|9573	0.602872	9.05565	15.1155	0.000126807	0.000963856
ENSG00000136156.12|mRNA|ITM2B|ENSG00000136156.12|ENSG00000136156.12|0|10210	0.602825	11.1228	9.78239	0.00195082	0.00749693
ENSG00000115457.9|mRNA|IGFBP2|ENSG00000115457.9|ENSG00000115457.9|0|4767	0.602821	4.83271	5.48589	0.0198832	0.0451016
ENSG00000265625.1|lncRNA|AC104564.6|ENSG00000265625.1|ENSG00000265625.1|0|1052	0.602769	2.33835	7.4153	0.00688024	0.019839
hsa_circ_0036379|circRNA|hsa_circ_0036379|hsa_circ_0036379|hsa_circ_0036379|0|574	0.602763	3.1851	9.27635	0.00254631	0.00924055
hsa_circ_0026233|circRNA|hsa_circ_0026233|hsa_circ_0026233|hsa_circ_0026233|0|600	0.602741	1.33353	6.19698	0.0133874	0.0331794
ENSG00000283345.1|pseudogene|AC127502.3|ENSG00000283345.1|ENSG00000283345.1|0|1206	0.602672	4.77661	12.1286	0.000577357	0.00298196
ENSG00000163898.9|mRNA|LIPH|ENSG00000163898.9|ENSG00000163898.9|0|4122	0.602668	5.54061	7.13837	0.00799472	0.0222578
hsa_circ_0017251|circRNA|hsa_circ_0017251|hsa_circ_0017251|hsa_circ_0017251|0|600	0.602307	3.71393	9.82376	0.00190891	0.00738496
ENSG00000140443.13|mRNA|IGF1R|ENSG00000140443.13|ENSG00000140443.13|0|13509	0.602229	5.10185	11.7879	0.000687873	0.00340184
ENSG00000231725.1|pseudogene|VN1R110P|ENSG00000231725.1|ENSG00000231725.1|0|971	0.60214	3.37448	6.39083	0.0120306	0.0305746
ENSG00000186148.13|pseudogene|AC013268.1|ENSG00000186148.13|ENSG00000186148.13|0|3900	0.602098	3.26361	6.82534	0.00948092	0.0253142
hsa_circ_0007151|circRNA|hsa_circ_0007151|hsa_circ_0007151|hsa_circ_0007151|0|600	0.60185	2.73368	9.21745	0.00262676	0.0094548
ENSG00000175779.1|mRNA|C15orf53|ENSG00000175779.1|ENSG00000175779.1|0|2043	0.601767	2.74635	5.54892	0.0191935	0.0438203
ENSG00000237461.1|lncRNA|AL359710.1|ENSG00000237461.1|ENSG00000237461.1|0|1544	0.601755	2.10712	8.44295	0.0039622	0.0129509
ENSG00000139722.6|mRNA|VPS37B|ENSG00000139722.6|ENSG00000139722.6|0|5953	0.601732	5.89098	16.1666	7.49548e-05	0.000653684
ENSG00000172037.13|mRNA|LAMB2|ENSG00000172037.13|ENSG00000172037.13|0|6865	0.601723	3.85914	7.89535	0.00531154	0.0161862
hsa_circ_0058175|circRNA|hsa_circ_0058175|hsa_circ_0058175|hsa_circ_0058175|0|600	0.601625	0.997435	6.66869	0.0103288	0.0270992
hsa_circ_0050556|circRNA|hsa_circ_0050556|hsa_circ_0050556|hsa_circ_0050556|0|600	0.601601	0.934378	5.61899	0.0184558	0.0425207
hsa_circ_0037104|circRNA|hsa_circ_0037104|hsa_circ_0037104|hsa_circ_0037104|0|600	0.601524	1.11843	6.87334	0.00923573	0.0247956
ENSG00000140682.18|mRNA|TGFB1I1|ENSG00000140682.18|ENSG00000140682.18|0|5403	0.601463	6.10896	9.7377	0.00199713	0.00762497
hsa_circ_0035296|circRNA|hsa_circ_0035296|hsa_circ_0035296|hsa_circ_0035296|0|600	0.601441	2.59783	8.65223	0.00354431	0.0118667
hsa_circ_0001479|circRNA|hsa_circ_0001479|hsa_circ_0001479|hsa_circ_0001479|0|600	0.601426	2.20804	7.85066	0.00544066	0.016494
hsa_circ_0007484|circRNA|hsa_circ_0007484|hsa_circ_0007484|hsa_circ_0007484|0|442	0.6013	1.07172	6.15187	0.0137253	0.0338256
ENSG00000017260.19|mRNA|ATP2C1|ENSG00000017260.19|ENSG00000017260.19|0|8533	0.601296	7.56786	13.3723	0.000305864	0.00185933
ENSG00000131725.13|mRNA|WDR44|ENSG00000131725.13|ENSG00000131725.13|0|4202	0.601204	8.83626	11.5232	0.000788442	0.00376103
hsa_circ_0087255|circRNA|hsa_circ_0087255|hsa_circ_0087255|hsa_circ_0087255|0|600	0.601157	1.29559	6.87985	0.00920296	0.0247243
ENSG00000243955.5|mRNA|GSTA1|ENSG00000243955.5|ENSG00000243955.5|0|1019	0.601081	3.9486	5.59509	0.0187041	0.0429488
hsa_circ_0001613|circRNA|hsa_circ_0001613|hsa_circ_0001613|hsa_circ_0001613|0|600	0.600898	3.02558	9.3414	0.00246038	0.00899747
ENSG00000081154.11|mRNA|PCNP|ENSG00000081154.11|ENSG00000081154.11|0|3102	0.600788	8.80799	17.5571	3.75895e-05	0.000387397
hsa_circ_0070467|circRNA|hsa_circ_0070467|hsa_circ_0070467|hsa_circ_0070467|0|600	0.600745	5.15435	9.83838	0.00189433	0.00734065
ENSG00000165702.13|mRNA|GFI1B|ENSG00000165702.13|ENSG00000165702.13|0|6104	0.600646	9.03859	8.7218	0.00341561	0.0115016
ENSG00000204424.9|mRNA|LY6G6F|ENSG00000204424.9|ENSG00000204424.9|0|920	0.600485	6.6002	8.31038	0.00425272	0.0136807
hsa_circ_0055748|circRNA|hsa_circ_0055748|hsa_circ_0055748|hsa_circ_0055748|0|600	0.600481	1.84853	5.74522	0.0172004	0.0402702
ENSG00000104805.15|mRNA|NUCB1|ENSG00000104805.15|ENSG00000104805.15|0|3937	0.600466	8.5232	15.668	9.61429e-05	0.000784487
hsa_circ_0001165|circRNA|hsa_circ_0001165|hsa_circ_0001165|hsa_circ_0001165|0|600	0.600385	2.52363	7.13238	0.00802078	0.0223054
ENSG00000228215.2|lncRNA|AL954650.1|ENSG00000228215.2|ENSG00000228215.2|0|2051	0.600352	3.46601	7.09092	0.00820357	0.0226652
ENSG00000262730.1|mRNA|AC104581.3|ENSG00000262730.1|ENSG00000262730.1|0|348	0.60027	8.46844	9.36542	0.00242941	0.00891036
ENSG00000174695.9|mRNA|TMEM167A|ENSG00000174695.9|ENSG00000174695.9|0|4908	0.600187	6.72567	16.019	8.06826e-05	0.000690629
ENSG00000175984.14|mRNA|DENND2C|ENSG00000175984.14|ENSG00000175984.14|0|7413	0.600031	6.59163	8.23809	0.00442025	0.0141014
ENSG00000259736.1|lncRNA|CRTC3-AS1|ENSG00000259736.1|ENSG00000259736.1|0|957	0.599972	3.98783	10.3922	0.00141783	0.00584392
ENSG00000113448.18|mRNA|PDE4D|ENSG00000113448.18|ENSG00000113448.18|0|16308	0.599942	6.77384	11.2998	0.000884924	0.00411226
ENSG00000253549.5|lncRNA|CA3-AS1|ENSG00000253549.5|ENSG00000253549.5|0|1257	0.599835	2.40416	7.80161	0.00558606	0.0168477
ENSG00000146416.17|mRNA|AIG1|ENSG00000146416.17|ENSG00000146416.17|0|6016	0.59983	5.56625	11.4417	0.000822351	0.0038876
hsa_circ_0087750|circRNA|hsa_circ_0087750|hsa_circ_0087750|hsa_circ_0087750|0|600	0.599684	1.74377	7.28276	0.00739219	0.0209487
ENSG00000111145.7|mRNA|ELK3|ENSG00000111145.7|ENSG00000111145.7|0|4648	0.599618	6.38802	15.3083	0.000115115	0.000898972
hsa_circ_0002330|circRNA|hsa_circ_0002330|hsa_circ_0002330|hsa_circ_0002330|0|600	0.599466	2.13413	9.03716	0.00288953	0.0101441
hsa_circ_0091092|circRNA|hsa_circ_0091092|hsa_circ_0091092|hsa_circ_0091092|0|600	0.599425	0.994192	5.73706	0.0172789	0.0404056
ENSG00000104231.10|mRNA|ZFAND1|ENSG00000104231.10|ENSG00000104231.10|0|4214	0.599318	7.62161	12.974	0.000374621	0.00217078
ENSG00000169519.20|mRNA|METTL15|ENSG00000169519.20|ENSG00000169519.20|0|7778	0.599266	5.91046	12.7393	0.000422294	0.00237392
hsa_circ_0053419|circRNA|hsa_circ_0053419|hsa_circ_0053419|hsa_circ_0053419|0|600	0.599161	1.87936	7.57312	0.00631786	0.0185336
hsa_circ_0003263|circRNA|hsa_circ_0003263|hsa_circ_0003263|hsa_circ_0003263|0|600	0.599025	1.25434	6.07931	0.0142874	0.0348577
ENSG00000135218.17|mRNA|CD36|ENSG00000135218.17|ENSG00000135218.17|0|10115	0.599011	9.31606	10.7135	0.00119937	0.00516214
hsa_circ_0059933|circRNA|hsa_circ_0059933|hsa_circ_0059933|hsa_circ_0059933|0|600	0.598978	1.17441	6.86699	0.00926776	0.0248515
ENSG00000108960.7|mRNA|MMD|ENSG00000108960.7|ENSG00000108960.7|0|3177	0.598865	9.62448	7.6211	0.00615641	0.0181531
hsa_circ_0070959|circRNA|hsa_circ_0070959|hsa_circ_0070959|hsa_circ_0070959|0|600	0.598754	3.88495	7.94578	0.00516963	0.0158409
ENSG00000151292.17|mRNA|CSNK1G3|ENSG00000151292.17|ENSG00000151292.17|0|5000	0.598545	7.27976	21.7429	4.86583e-06	8.38798e-05
hsa_circ_0087264|circRNA|hsa_circ_0087264|hsa_circ_0087264|hsa_circ_0087264|0|600	0.598372	3.43053	7.78173	0.00564612	0.0170049
ENSG00000122643.18|mRNA|NT5C3A|ENSG00000122643.18|ENSG00000122643.18|0|3493	0.59829	10.2957	9.4423	0.00233291	0.00861665
hsa_circ_0035955|circRNA|hsa_circ_0035955|hsa_circ_0035955|hsa_circ_0035955|0|600	0.598258	3.95882	7.9647	0.0051174	0.0157389
ENSG00000267052.1|lncRNA|AC005050.1|ENSG00000267052.1|ENSG00000267052.1|0|550	0.598231	1.76349	6.34836	0.0123151	0.0311155
ENSG00000153936.16|mRNA|HS2ST1|ENSG00000153936.16|ENSG00000153936.16|0|7429	0.598197	4.70968	12.6732	0.0004368	0.00243199
hsa_circ_0031573|circRNA|hsa_circ_0031573|hsa_circ_0031573|hsa_circ_0031573|0|600	0.598164	1.56158	6.13484	0.0138551	0.0340363
ENSG00000254786.1|pseudogene|AP001636.1|ENSG00000254786.1|ENSG00000254786.1|0|1122	0.598047	6.11785	6.62222	0.0105951	0.0276197
hsa_circ_0001990|circRNA|hsa_circ_0001990|hsa_circ_0001990|hsa_circ_0001990|0|600	0.597433	1.25134	6.83396	0.00943636	0.0252154
hsa_circ_0010909|circRNA|hsa_circ_0010909|hsa_circ_0010909|hsa_circ_0010909|0|600	0.597188	1.65675	6.89406	0.00913191	0.0245731
hsa_circ_0000414|circRNA|hsa_circ_0000414|hsa_circ_0000414|hsa_circ_0000414|0|600	0.597179	2.93929	8.39055	0.00407454	0.0132375
hsa_circ_0035052|circRNA|hsa_circ_0035052|hsa_circ_0035052|hsa_circ_0035052|0|600	0.597086	2.71874	7.84614	0.0054539	0.0165191
hsa_circ_0071036|circRNA|hsa_circ_0071036|hsa_circ_0071036|hsa_circ_0071036|0|472	0.597003	1.91583	7.08069	0.00824933	0.0227664
ENSG00000151693.10|mRNA|ASAP2|ENSG00000151693.10|ENSG00000151693.10|0|7257	0.596917	9.08994	8.18328	0.00455177	0.0144309
hsa_circ_0075811|circRNA|hsa_circ_0075811|hsa_circ_0075811|hsa_circ_0075811|0|600	0.596521	1.52865	7.48804	0.00661491	0.0192352
ENSG00000117020.16|mRNA|AKT3|ENSG00000117020.16|ENSG00000117020.16|0|9475	0.596511	9.03954	17.8833	3.19972e-05	0.000343294
ENSG00000100181.22|pseudogene|TPTEP1|ENSG00000100181.22|ENSG00000100181.22|0|9653	0.596386	9.21362	7.92956	0.00521484	0.0159427
ENSG00000197140.14|mRNA|ADAM32|ENSG00000197140.14|ENSG00000197140.14|0|10044	0.596333	4.81407	8.75603	0.00335407	0.0113308
ENSG00000127325.18|mRNA|BEST3|ENSG00000127325.18|ENSG00000127325.18|0|6863	0.596196	3.9281	6.3076	0.0125949	0.0316179
hsa_circ_0000603|circRNA|hsa_circ_0000603|hsa_circ_0000603|hsa_circ_0000603|0|600	0.596171	3.35297	9.22919	0.00261051	0.00941532
ENSG00000256034.1|lncRNA|AP002770.1|ENSG00000256034.1|ENSG00000256034.1|0|428	0.595986	2.6299	6.06475	0.014403	0.0350754
hsa_circ_0036372|circRNA|hsa_circ_0036372|hsa_circ_0036372|hsa_circ_0036372|0|600	0.595923	3.317	7.18788	0.00778262	0.0218097
hsa_circ_0057602|circRNA|hsa_circ_0057602|hsa_circ_0057602|hsa_circ_0057602|0|600	0.595758	1.16453	5.7806	0.0168647	0.0396519
hsa_circ_0003330|circRNA|hsa_circ_0003330|hsa_circ_0003330|hsa_circ_0003330|0|600	0.595616	2.51359	7.74349	0.00576354	0.0172837
hsa_circ_0009071|circRNA|hsa_circ_0009071|hsa_circ_0009071|hsa_circ_0009071|0|600	0.595612	1.37932	7.46881	0.00668404	0.0193843
hsa_circ_0073524|circRNA|hsa_circ_0073524|hsa_circ_0073524|hsa_circ_0073524|0|600	0.595358	3.40502	6.97231	0.00875058	0.0238072
hsa_circ_0059934|circRNA|hsa_circ_0059934|hsa_circ_0059934|hsa_circ_0059934|0|600	0.595341	1.70823	8.45789	0.00393078	0.0128676
ENSG00000011454.16|mRNA|RABGAP1|ENSG00000011454.16|ENSG00000011454.16|0|9162	0.595246	8.09687	17.7757	3.37424e-05	0.000357594
hsa_circ_0047350|circRNA|hsa_circ_0047350|hsa_circ_0047350|hsa_circ_0047350|0|600	0.595229	1.35688	7.13349	0.00801597	0.0222973
ENSG00000183044.11|mRNA|ABAT|ENSG00000183044.11|ENSG00000183044.11|0|9744	0.59521	5.78893	9.21872	0.00262499	0.00945386
hsa_circ_0072380|circRNA|hsa_circ_0072380|hsa_circ_0072380|hsa_circ_0072380|0|600	0.595201	2.8722	9.44086	0.00233468	0.00862057
hsa_circ_0003777|circRNA|hsa_circ_0003777|hsa_circ_0003777|hsa_circ_0003777|0|600	0.595106	0.969689	5.66053	0.0180325	0.041777
ENSG00000113600.10|mRNA|C9|ENSG00000113600.10|ENSG00000113600.10|0|2951	0.595098	8.31349	10.1971	0.00156993	0.00633211
hsa_circ_0072545|circRNA|hsa_circ_0072545|hsa_circ_0072545|hsa_circ_0072545|0|600	0.595076	1.94969	7.84414	0.00545974	0.0165338
hsa_circ_0003511|circRNA|hsa_circ_0003511|hsa_circ_0003511|hsa_circ_0003511|0|600	0.594928	1.45886	8.12904	0.00468584	0.01474
ENSG00000237181.1|lncRNA|AC147651.3|ENSG00000237181.1|ENSG00000237181.1|0|731	0.594922	3.26053	8.6346	0.00357771	0.0119402
ENSG00000177990.11|mRNA|DPY19L2|ENSG00000177990.11|ENSG00000177990.11|0|5646	0.594846	5.15529	7.81737	0.0055389	0.0167308
ENSG00000233968.6|lncRNA|AL157895.1|ENSG00000233968.6|ENSG00000233968.6|0|2151	0.594746	8.06066	5.48885	0.0198502	0.0450514
hsa_circ_0010047|circRNA|hsa_circ_0010047|hsa_circ_0010047|hsa_circ_0010047|0|520	0.594637	1.4599	6.62044	0.0106054	0.0276322
ENSG00000187764.11|mRNA|SEMA4D|ENSG00000187764.11|ENSG00000187764.11|0|14160	0.594523	9.4518	9.90172	0.00183243	0.0071548
ENSG00000170035.15|mRNA|UBE2E3|ENSG00000170035.15|ENSG00000170035.15|0|2973	0.594379	7.41582	13.929	0.000230609	0.00150726
hsa_circ_0031632|circRNA|hsa_circ_0031632|hsa_circ_0031632|hsa_circ_0031632|0|600	0.594221	1.43337	5.91821	0.0156222	0.0373558
hsa_circ_0000842|circRNA|hsa_circ_0000842|hsa_circ_0000842|hsa_circ_0000842|0|600	0.594134	4.34418	12.2298	0.000548135	0.00286268
hsa_circ_0060585|circRNA|hsa_circ_0060585|hsa_circ_0060585|hsa_circ_0060585|0|586	0.593435	1.08464	6.86418	0.00928197	0.0248829
ENSG00000214941.7|mRNA|ZSWIM7|ENSG00000214941.7|ENSG00000214941.7|0|2559	0.593412	6.29118	18.819	2.01934e-05	0.000242874
ENSG00000243004.5|lncRNA|AC005062.1|ENSG00000243004.5|ENSG00000243004.5|0|2564	0.593407	2.47888	7.02344	0.00851033	0.0233029
hsa_circ_0029627|circRNA|hsa_circ_0029627|hsa_circ_0029627|hsa_circ_0029627|0|572	0.593296	0.947985	6.17549	0.0135473	0.0334655
ENSG00000101412.12|mRNA|E2F1|ENSG00000101412.12|ENSG00000101412.12|0|2503	0.593229	3.85549	7.70989	0.00586877	0.0175006
hsa_circ_0082583|circRNA|hsa_circ_0082583|hsa_circ_0082583|hsa_circ_0082583|0|600	0.593178	3.50005	7.18244	0.00780564	0.0218595
hsa_circ_0024299|circRNA|hsa_circ_0024299|hsa_circ_0024299|hsa_circ_0024299|0|448	0.592798	1.29004	6.72925	0.0099921	0.0263859
hsa_circ_0069608|circRNA|hsa_circ_0069608|hsa_circ_0069608|hsa_circ_0069608|0|600	0.592732	2.46095	7.42562	0.00684194	0.0197511
hsa_circ_0006389|circRNA|hsa_circ_0006389|hsa_circ_0006389|hsa_circ_0006389|0|600	0.592531	1.93475	7.24577	0.00754198	0.0212825
ENSG00000243422.2|pseudogene|RPL23AP49|ENSG00000243422.2|ENSG00000243422.2|0|1138	0.59253	2.12124	6.02924	0.0146891	0.0356199
hsa_circ_0032529|circRNA|hsa_circ_0032529|hsa_circ_0032529|hsa_circ_0032529|0|600	0.592238	0.842094	5.33205	0.0216771	0.048264
ENSG00000198075.9|mRNA|SULT1C4|ENSG00000198075.9|ENSG00000198075.9|0|2898	0.592202	2.14872	8.31264	0.00424758	0.0136686
hsa_circ_0085439|circRNA|hsa_circ_0085439|hsa_circ_0085439|hsa_circ_0085439|0|600	0.592128	2.48629	9.66473	0.00207519	0.00785234
ENSG00000235257.8|lncRNA|ITGA9-AS1|ENSG00000235257.8|ENSG00000235257.8|0|6651	0.592062	7.38041	7.96284	0.00512251	0.0157449
ENSG00000203879.11|mRNA|GDI1|ENSG00000203879.11|ENSG00000203879.11|0|5256	0.592032	7.55542	14.0384	0.0002182	0.00144249
ENSG00000267072.2|lncRNA|NAGPA-AS1|ENSG00000267072.2|ENSG00000267072.2|0|2630	0.591963	2.78682	5.54597	0.0192252	0.0438726
hsa_circ_0004816|circRNA|hsa_circ_0004816|hsa_circ_0004816|hsa_circ_0004816|0|432	0.591939	1.24136	6.17742	0.0135328	0.0334411
hsa_circ_0068368|circRNA|hsa_circ_0068368|hsa_circ_0068368|hsa_circ_0068368|0|600	0.591889	1.22307	6.03206	0.0146662	0.0355942
ENSG00000125962.14|mRNA|ARMCX5|ENSG00000125962.14|ENSG00000125962.14|0|4911	0.591833	3.34614	12.0846	0.000590528	0.00303168
hsa_circ_0055947|circRNA|hsa_circ_0055947|hsa_circ_0055947|hsa_circ_0055947|0|600	0.591812	4.34561	9.86203	0.00187097	0.0072678
ENSG00000111817.16|mRNA|DSE|ENSG00000111817.16|ENSG00000111817.16|0|15016	0.591738	6.64532	9.72113	0.00201459	0.0076784
ENSG00000240497.2|lncRNA|AC092919.1|ENSG00000240497.2|ENSG00000240497.2|0|229	0.591665	5.32304	7.16437	0.00788263	0.0220195
ENSG00000167642.12|mRNA|SPINT2|ENSG00000167642.12|ENSG00000167642.12|0|5199	0.591467	5.98755	8.98548	0.00296969	0.0103462
ENSG00000100206.9|mRNA|DMC1|ENSG00000100206.9|ENSG00000100206.9|0|3524	0.591209	5.04737	11.5249	0.000787774	0.00375889
ENSG00000189045.13|mRNA|ANKDD1B|ENSG00000189045.13|ENSG00000189045.13|0|3287	0.590965	3.82	6.66618	0.010343	0.0271114
hsa_circ_0035946|circRNA|hsa_circ_0035946|hsa_circ_0035946|hsa_circ_0035946|0|600	0.590935	2.74797	8.12334	0.00470018	0.01477
hsa_circ_0017331|circRNA|hsa_circ_0017331|hsa_circ_0017331|hsa_circ_0017331|0|600	0.590848	1.14007	6.32844	0.012451	0.0313504
hsa_circ_0036084|circRNA|hsa_circ_0036084|hsa_circ_0036084|hsa_circ_0036084|0|600	0.590691	1.12388	6.32883	0.0124483	0.0313501
hsa_circ_0023644|circRNA|hsa_circ_0023644|hsa_circ_0023644|hsa_circ_0023644|0|600	0.590528	1.72739	6.59282	0.0107672	0.0279552
ENSG00000175294.5|mRNA|CATSPER1|ENSG00000175294.5|ENSG00000175294.5|0|2687	0.590471	4.20941	10.9737	0.00104774	0.00467786
ENSG00000124193.14|mRNA|SRSF6|ENSG00000124193.14|ENSG00000124193.14|0|4593	0.590457	9.02683	11.8968	0.000650404	0.00326101
ENSG00000151466.11|mRNA|SCLT1|ENSG00000151466.11|ENSG00000151466.11|0|8292	0.590329	10.2299	15.1193	0.000126569	0.000963036
ENSG00000226822.2|lncRNA|AL390036.1|ENSG00000226822.2|ENSG00000226822.2|0|3711	0.590142	2.84956	8.56376	0.00371519	0.0123027
hsa_circ_0036197|circRNA|hsa_circ_0036197|hsa_circ_0036197|hsa_circ_0036197|0|600	0.590116	1.86221	5.91785	0.0156254	0.0373589
hsa_circ_0006886|circRNA|hsa_circ_0006886|hsa_circ_0006886|hsa_circ_0006886|0|600	0.590059	6.04714	15.9695	8.26986e-05	0.000701385
ENSG00000151743.10|mRNA|AMN1|ENSG00000151743.10|ENSG00000151743.10|0|3195	0.590025	4.77271	12.7344	0.000423347	0.00237783
ENSG00000250641.1|mRNA|AL662899.2|ENSG00000250641.1|ENSG00000250641.1|0|1266	0.589953	6.17771	7.83531	0.00548573	0.016595
hsa_circ_0034516|circRNA|hsa_circ_0034516|hsa_circ_0034516|hsa_circ_0034516|0|536	0.589879	3.80547	6.01208	0.0148294	0.0358774
ENSG00000143776.18|mRNA|CDC42BPA|ENSG00000143776.18|ENSG00000143776.18|0|14055	0.589853	7.23718	20.5706	8.58586e-06	0.000129637
ENSG00000103194.15|mRNA|USP10|ENSG00000103194.15|ENSG00000103194.15|0|5083	0.589851	7.57038	14.4317	0.000178888	0.00124849
hsa_circ_0008937|circRNA|hsa_circ_0008937|hsa_circ_0008937|hsa_circ_0008937|0|600	0.589759	2.17824	6.66653	0.010341	0.0271114
hsa_circ_0082008|circRNA|hsa_circ_0082008|hsa_circ_0082008|hsa_circ_0082008|0|232	0.589756	1.34774	5.99137	0.0150007	0.0362215
ENSG00000115641.18|mRNA|FHL2|ENSG00000115641.18|ENSG00000115641.18|0|6626	0.589703	5.3235	8.54124	0.00376	0.0124161
hsa_circ_0027680|circRNA|hsa_circ_0027680|hsa_circ_0027680|hsa_circ_0027680|0|600	0.589654	1.27255	4.81156	0.0291054	0.0608117
ENSG00000119801.12|mRNA|YPEL5|ENSG00000119801.12|ENSG00000119801.12|0|3421	0.589616	9.87892	12.0778	0.000592621	0.00303821
hsa_circ_0033132|circRNA|hsa_circ_0033132|hsa_circ_0033132|hsa_circ_0033132|0|600	0.589597	0.98008	5.89862	0.0157931	0.0376786
hsa_circ_0000029|circRNA|hsa_circ_0000029|hsa_circ_0000029|hsa_circ_0000029|0|600	0.589485	1.04711	6.34363	0.0123473	0.0311691
ENSG00000227355.2|lncRNA|AL359644.1|ENSG00000227355.2|ENSG00000227355.2|0|1671	0.589473	6.53279	7.22403	0.00763142	0.021465
hsa_circ_0082671|circRNA|hsa_circ_0082671|hsa_circ_0082671|hsa_circ_0082671|0|600	0.589264	1.49725	6.51264	0.0112515	0.0289936
hsa_circ_0001073|circRNA|hsa_circ_0001073|hsa_circ_0001073|hsa_circ_0001073|0|600	0.589185	6.15301	8.78158	0.00330885	0.0112198
hsa_circ_0005325|circRNA|hsa_circ_0005325|hsa_circ_0005325|hsa_circ_0005325|0|600	0.589184	2.79819	9.17669	0.00268394	0.00961065
hsa_circ_0025853|circRNA|hsa_circ_0025853|hsa_circ_0025853|hsa_circ_0025853|0|600	0.589123	2.49267	6.89602	0.00912216	0.0245668
hsa_circ_0086732|circRNA|hsa_circ_0086732|hsa_circ_0086732|hsa_circ_0086732|0|600	0.589051	2.87466	8.25365	0.00438362	0.0140137
hsa_circ_0030286|circRNA|hsa_circ_0030286|hsa_circ_0030286|hsa_circ_0030286|0|600	0.58898	1.8279	8.4877	0.00386881	0.0127039
ENSG00000226310.1|lncRNA|AL022157.1|ENSG00000226310.1|ENSG00000226310.1|0|665	0.588976	2.39354	8.06919	0.00483852	0.0150953
hsa_circ_0005374|circRNA|hsa_circ_0005374|hsa_circ_0005374|hsa_circ_0005374|0|600	0.588954	5.39116	11.7913	0.000686693	0.00339853
ENSG00000175161.13|mRNA|CADM2|ENSG00000175161.13|ENSG00000175161.13|0|9990	0.588731	3.86013	6.03006	0.0146824	0.0356081
ENSG00000237484.5|lncRNA|LINC01684|ENSG00000237484.5|ENSG00000237484.5|0|4970	0.588715	3.96547	11.2352	0.000915007	0.00421864
hsa_circ_0003279|circRNA|hsa_circ_0003279|hsa_circ_0003279|hsa_circ_0003279|0|574	0.588534	2.89417	8.92379	0.00306838	0.010604
ENSG00000270820.5|lncRNA|AC016727.1|ENSG00000270820.5|ENSG00000270820.5|0|1963	0.588513	3.48408	9.05895	0.0028564	0.0100602
ENSG00000010278.12|mRNA|CD9|ENSG00000010278.12|ENSG00000010278.12|0|3299	0.588483	8.64707	7.81437	0.00554785	0.0167553
hsa_circ_0070934|circRNA|hsa_circ_0070934|hsa_circ_0070934|hsa_circ_0070934|0|600	0.588465	2.86371	7.29549	0.00734139	0.0208344
hsa_circ_0090045|circRNA|hsa_circ_0090045|hsa_circ_0090045|hsa_circ_0090045|0|600	0.588366	1.206	6.99908	0.00862394	0.0235268
hsa_circ_0008148|circRNA|hsa_circ_0008148|hsa_circ_0008148|hsa_circ_0008148|0|600	0.588207	1.51973	7.31263	0.0072735	0.0206859
hsa_circ_0032825|circRNA|hsa_circ_0032825|hsa_circ_0032825|hsa_circ_0032825|0|600	0.588177	2.99133	8.75766	0.00335116	0.0113286
ENSG00000147650.11|mRNA|LRP12|ENSG00000147650.11|ENSG00000147650.11|0|9777	0.588174	5.0461	8.29923	0.00427812	0.0137458
hsa_circ_0044242|circRNA|hsa_circ_0044242|hsa_circ_0044242|hsa_circ_0044242|0|600	0.588131	4.41803	6.48929	0.0113967	0.0292883
ENSG00000170043.11|mRNA|TRAPPC1|ENSG00000170043.11|ENSG00000170043.11|0|1171	0.588026	9.20874	10.5311	0.00131879	0.00552706
hsa_circ_0012553|circRNA|hsa_circ_0012553|hsa_circ_0012553|hsa_circ_0012553|0|600	0.587968	2.51847	10.1472	0.00161136	0.00645484
ENSG00000106089.11|mRNA|STX1A|ENSG00000106089.11|ENSG00000106089.11|0|3693	0.58796	5.7036	8.35779	0.0041464	0.0134079
hsa_circ_0000018|circRNA|hsa_circ_0000018|hsa_circ_0000018|hsa_circ_0000018|0|600	0.587906	4.84846	8.89223	0.00312016	0.0107352
ENSG00000242193.10|pseudogene|AL359075.1|ENSG00000242193.10|ENSG00000242193.10|0|5538	0.587903	3.76219	15.8972	8.57398e-05	0.00072064
hsa_circ_0004985|circRNA|hsa_circ_0004985|hsa_circ_0004985|hsa_circ_0004985|0|600	0.58789	2.73201	7.92292	0.00523348	0.0159948
ENSG00000234456.7|lncRNA|MAGI2-AS3|ENSG00000234456.7|ENSG00000234456.7|0|11625	0.587824	7.18799	4.74888	0.030165	0.0625341
hsa_circ_0004058|circRNA|hsa_circ_0004058|hsa_circ_0004058|hsa_circ_0004058|0|600	0.587732	3.4018	9.78833	0.00194474	0.00747935
ENSG00000169925.16|mRNA|BRD3|ENSG00000169925.16|ENSG00000169925.16|0|6876	0.58768	7.9792	15.6383	9.75843e-05	0.000792798
hsa_circ_0030572|circRNA|hsa_circ_0030572|hsa_circ_0030572|hsa_circ_0030572|0|600	0.587589	2.16541	7.11467	0.00809837	0.0224398
ENSG00000269293.2|lncRNA|ZSCAN16-AS1|ENSG00000269293.2|ENSG00000269293.2|0|2163	0.587537	5.5421	9.03627	0.0028909	0.0101441
hsa_circ_0006780|circRNA|hsa_circ_0006780|hsa_circ_0006780|hsa_circ_0006780|0|600	0.587449	1.79056	7.26708	0.00745531	0.0211036
hsa_circ_0058916|circRNA|hsa_circ_0058916|hsa_circ_0058916|hsa_circ_0058916|0|600	0.587316	1.48688	7.72706	0.00581473	0.0173893
ENSG00000186470.13|mRNA|BTN3A2|ENSG00000186470.13|ENSG00000186470.13|0|7042	0.587283	6.44423	20.6121	8.4147e-06	0.000127875
ENSG00000143409.15|mRNA|MINDY1|ENSG00000143409.15|ENSG00000143409.15|0|3792	0.587081	7.73287	8.77306	0.00332387	0.0112535
hsa_circ_0031446|circRNA|hsa_circ_0031446|hsa_circ_0031446|hsa_circ_0031446|0|600	0.587064	4.31776	8.81462	0.00325133	0.0110624
ENSG00000134317.17|mRNA|GRHL1|ENSG00000134317.17|ENSG00000134317.17|0|7952	0.586987	6.24621	7.02924	0.00848348	0.0232422
hsa_circ_0075008|circRNA|hsa_circ_0075008|hsa_circ_0075008|hsa_circ_0075008|0|600	0.586877	1.06989	5.89071	0.0158627	0.0378028
ENSG00000247271.6|lncRNA|ZBED5-AS1|ENSG00000247271.6|ENSG00000247271.6|0|1995	0.586844	4.98476	9.58243	0.00216698	0.0081338
ENSG00000271320.1|lncRNA|AC091488.1|ENSG00000271320.1|ENSG00000271320.1|0|660	0.586834	1.73236	5.51047	0.0196112	0.0445855
hsa_circ_0009162|circRNA|hsa_circ_0009162|hsa_circ_0009162|hsa_circ_0009162|0|600	0.586801	0.926308	5.07918	0.0250014	0.0539667
hsa_circ_0001772|circRNA|hsa_circ_0001772|hsa_circ_0001772|hsa_circ_0001772|0|600	0.586741	6.57423	16.1013	7.74346e-05	0.000669618
ENSG00000110013.12|mRNA|SIAE|ENSG00000110013.12|ENSG00000110013.12|0|8139	0.586692	7.78354	7.00992	0.00857317	0.0234268
hsa_circ_0001048|circRNA|hsa_circ_0001048|hsa_circ_0001048|hsa_circ_0001048|0|600	0.586691	2.48422	8.39596	0.00406279	0.0132147
ENSG00000171385.9|mRNA|KCND3|ENSG00000171385.9|ENSG00000171385.9|0|7863	0.586657	3.44061	6.71116	0.0100915	0.0266061
ENSG00000131507.10|mRNA|NDFIP1|ENSG00000131507.10|ENSG00000131507.10|0|6024	0.586585	7.18594	10.9524	0.00105938	0.00471637
ENSG00000124145.6|mRNA|SDC4|ENSG00000124145.6|ENSG00000124145.6|0|2613	0.586568	4.33165	7.95369	0.00514772	0.0157907
hsa_circ_0056569|circRNA|hsa_circ_0056569|hsa_circ_0056569|hsa_circ_0056569|0|600	0.586528	1.73458	5.10066	0.0246994	0.0534712
hsa_circ_0088051|circRNA|hsa_circ_0088051|hsa_circ_0088051|hsa_circ_0088051|0|570	0.586505	4.36836	8.55741	0.00372776	0.0123357
hsa_circ_0042091|circRNA|hsa_circ_0042091|hsa_circ_0042091|hsa_circ_0042091|0|600	0.586443	4.34724	10.9803	0.00104419	0.0046654
hsa_circ_0020822|circRNA|hsa_circ_0020822|hsa_circ_0020822|hsa_circ_0020822|0|600	0.586348	3.23103	9.37998	0.00241082	0.00885194
hsa_circ_0061764|circRNA|hsa_circ_0061764|hsa_circ_0061764|hsa_circ_0061764|0|468	0.586292	1.03107	5.46877	0.020075	0.0454413
hsa_circ_0029696|circRNA|hsa_circ_0029696|hsa_circ_0029696|hsa_circ_0029696|0|600	0.586278	2.2556	8.17782	0.00456507	0.0144639
ENSG00000237473.1|lncRNA|AC068759.1|ENSG00000237473.1|ENSG00000237473.1|0|470	0.586263	4.28731	6.03952	0.0146057	0.0354867
ENSG00000095303.14|mRNA|PTGS1|ENSG00000095303.14|ENSG00000095303.14|0|5790	0.586178	10.9791	8.58957	0.00366448	0.0121712
hsa_circ_0079645|circRNA|hsa_circ_0079645|hsa_circ_0079645|hsa_circ_0079645|0|600	0.586112	1.73241	9.31187	0.00249901	0.00910369
hsa_circ_0082993|circRNA|hsa_circ_0082993|hsa_circ_0082993|hsa_circ_0082993|0|600	0.58611	1.64789	6.94521	0.00888074	0.0240791
hsa_circ_0087636|circRNA|hsa_circ_0087636|hsa_circ_0087636|hsa_circ_0087636|0|600	0.586093	2.08654	6.90666	0.00906935	0.0244741
ENSG00000137076.20|mRNA|TLN1|ENSG00000137076.20|ENSG00000137076.20|0|10076	0.586065	12.8345	8.57558	0.00369186	0.0122458
ENSG00000118276.11|mRNA|B4GALT6|ENSG00000118276.11|ENSG00000118276.11|0|5306	0.586005	5.12205	8.33534	0.00419641	0.0135367
hsa_circ_0007886|circRNA|hsa_circ_0007886|hsa_circ_0007886|hsa_circ_0007886|0|600	0.585932	0.982603	5.66678	0.0179697	0.0416655
ENSG00000123739.10|mRNA|PLA2G12A|ENSG00000123739.10|ENSG00000123739.10|0|5228	0.585916	8.43143	7.20967	0.00769114	0.0215995
ENSG00000174437.16|mRNA|ATP2A2|ENSG00000174437.16|ENSG00000174437.16|0|13745	0.585872	6.64954	10.8798	0.0011001	0.00484714
ENSG00000179761.11|mRNA|PIPOX|ENSG00000179761.11|ENSG00000179761.11|0|4059	0.585867	2.74035	8.86177	0.00317099	0.0108613
ENSG00000119139.17|mRNA|TJP2|ENSG00000119139.17|ENSG00000119139.17|0|7749	0.585797	7.34978	11.4018	0.00083949	0.00394339
hsa_circ_0015068|circRNA|hsa_circ_0015068|hsa_circ_0015068|hsa_circ_0015068|0|600	0.585769	2.01924	7.01406	0.0085539	0.0233901
ENSG00000011105.12|mRNA|TSPAN9|ENSG00000011105.12|ENSG00000011105.12|0|6905	0.585737	6.05676	7.42207	0.0068551	0.0197779
ENSG00000169490.16|mRNA|TM2D2|ENSG00000169490.16|ENSG00000169490.16|0|4459	0.585726	4.76899	10.0694	0.00167834	0.00666767
hsa_circ_0004425|circRNA|hsa_circ_0004425|hsa_circ_0004425|hsa_circ_0004425|0|600	0.585683	4.01861	8.1313	0.00468017	0.014728
hsa_circ_0039355|circRNA|hsa_circ_0039355|hsa_circ_0039355|hsa_circ_0039355|0|600	0.585569	1.80725	5.70348	0.0176055	0.0410163
hsa_circ_0009133|circRNA|hsa_circ_0009133|hsa_circ_0009133|hsa_circ_0009133|0|600	0.585528	1.60309	8.35811	0.0041457	0.0134078
hsa_circ_0008075|circRNA|hsa_circ_0008075|hsa_circ_0008075|hsa_circ_0008075|0|600	0.585523	5.91003	8.74965	0.00336545	0.0113577
ENSG00000182048.11|pseudogene|TRPC2|ENSG00000182048.11|ENSG00000182048.11|0|3262	0.585466	4.23689	6.73427	0.0099647	0.0263309
hsa_circ_0073608|circRNA|hsa_circ_0073608|hsa_circ_0073608|hsa_circ_0073608|0|600	0.585295	1.44773	6.15888	0.0136722	0.0337156
ENSG00000172578.11|mRNA|KLHL6|ENSG00000172578.11|ENSG00000172578.11|0|10546	0.585274	6.06038	12.8777	0.000393488	0.00225351
hsa_circ_0022027|circRNA|hsa_circ_0022027|hsa_circ_0022027|hsa_circ_0022027|0|508	0.585273	1.60183	6.71496	0.0100705	0.0265613
hsa_circ_0008935|circRNA|hsa_circ_0008935|hsa_circ_0008935|hsa_circ_0008935|0|600	0.585079	1.97846	6.73121	0.00998137	0.026368
ENSG00000073792.15|mRNA|IGF2BP2|ENSG00000073792.15|ENSG00000073792.15|0|4735	0.585013	7.84456	13.3637	0.000307194	0.00186685
ENSG00000071051.13|mRNA|NCK2|ENSG00000071051.13|ENSG00000071051.13|0|2990	0.584922	7.91006	10.7553	0.00117355	0.00508836
hsa_circ_0005848|circRNA|hsa_circ_0005848|hsa_circ_0005848|hsa_circ_0005848|0|600	0.584865	3.46056	10.2816	0.00150212	0.0061155
hsa_circ_0003323|circRNA|hsa_circ_0003323|hsa_circ_0003323|hsa_circ_0003323|0|458	0.584638	0.871686	6.10169	0.0141115	0.0345426
hsa_circ_0019612|circRNA|hsa_circ_0019612|hsa_circ_0019612|hsa_circ_0019612|0|600	0.584583	0.926484	5.91382	0.0156603	0.0374111
ENSG00000167363.13|mRNA|FN3K|ENSG00000167363.13|ENSG00000167363.13|0|3872	0.584506	6.53442	8.22375	0.00445428	0.0141782
ENSG00000204420.8|mRNA|MPIG6B|ENSG00000204420.8|ENSG00000204420.8|0|2937	0.58445	8.97547	6.31525	0.0125418	0.0315125
ENSG00000138685.13|mRNA|FGF2|ENSG00000138685.13|ENSG00000138685.13|0|6775	0.584406	3.79615	8.56493	0.00371285	0.0123013
ENSG00000185418.15|mRNA|TARSL2|ENSG00000185418.15|ENSG00000185418.15|0|4584	0.584295	6.41244	16.0717	7.85861e-05	0.000677355
ENSG00000174099.10|mRNA|MSRB3|ENSG00000174099.10|ENSG00000174099.10|0|5791	0.584272	6.18012	11.5166	0.000791161	0.00376964
ENSG00000144468.16|mRNA|RHBDD1|ENSG00000144468.16|ENSG00000144468.16|0|6926	0.58422	7.68435	11.8683	0.000659981	0.00329577
hsa_circ_0037965|circRNA|hsa_circ_0037965|hsa_circ_0037965|hsa_circ_0037965|0|520	0.584206	1.95728	7.37387	0.00703624	0.0201867
hsa_circ_0047315|circRNA|hsa_circ_0047315|hsa_circ_0047315|hsa_circ_0047315|0|600	0.584199	0.931846	5.75108	0.0171443	0.040172
hsa_circ_0003928|circRNA|hsa_circ_0003928|hsa_circ_0003928|hsa_circ_0003928|0|600	0.584147	2.82623	7.31657	0.00725801	0.0206536
ENSG00000188677.14|mRNA|PARVB|ENSG00000188677.14|ENSG00000188677.14|0|7403	0.584071	8.5361	12.6831	0.000434593	0.00242189
ENSG00000147145.12|mRNA|LPAR4|ENSG00000147145.12|ENSG00000147145.12|0|3113	0.584067	3.18623	6.21643	0.0132444	0.0328924
ENSG00000198898.13|mRNA|CAPZA2|ENSG00000198898.13|ENSG00000198898.13|0|8425	0.584045	9.57233	13.4068	0.000300538	0.00183478
hsa_circ_0008585|circRNA|hsa_circ_0008585|hsa_circ_0008585|hsa_circ_0008585|0|600	0.58401	2.96132	7.39414	0.00695947	0.0200038
ENSG00000242516.1|lncRNA|LINC00960|ENSG00000242516.1|ENSG00000242516.1|0|3181	0.583957	1.86066	4.98933	0.0263072	0.0561415
hsa_circ_0070441|circRNA|hsa_circ_0070441|hsa_circ_0070441|hsa_circ_0070441|0|286	0.583955	2.49993	5.93843	0.0154478	0.0370677
hsa_circ_0054178|circRNA|hsa_circ_0054178|hsa_circ_0054178|hsa_circ_0054178|0|600	0.583862	1.41413	6.6411	0.010486	0.0274181
ENSG00000114209.14|mRNA|PDCD10|ENSG00000114209.14|ENSG00000114209.14|0|3275	0.583639	8.92231	14.2291	0.000198147	0.00135205
ENSG00000256263.1|pseudogene|DDX11L8|ENSG00000256263.1|ENSG00000256263.1|0|366	0.583596	2.9861	6.36163	0.0122255	0.0309438
hsa_circ_0071429|circRNA|hsa_circ_0071429|hsa_circ_0071429|hsa_circ_0071429|0|600	0.583247	3.21329	6.90503	0.00907744	0.0244843
hsa_circ_0004179|circRNA|hsa_circ_0004179|hsa_circ_0004179|hsa_circ_0004179|0|600	0.583184	2.40056	7.5618	0.0063566	0.0186171
ENSG00000149177.12|mRNA|PTPRJ|ENSG00000149177.12|ENSG00000149177.12|0|9620	0.583184	10.1616	7.14372	0.00797153	0.022217
ENSG00000250348.1|lncRNA|AC113404.1|ENSG00000250348.1|ENSG00000250348.1|0|756	0.583136	4.07792	6.67724	0.0102806	0.0270018
hsa_circ_0075235|circRNA|hsa_circ_0075235|hsa_circ_0075235|hsa_circ_0075235|0|600	0.583081	1.8129	6.88845	0.00915988	0.0246365
ENSG00000086232.12|mRNA|EIF2AK1|ENSG00000086232.12|ENSG00000086232.12|0|5550	0.583055	10.445	12.3628	0.000511995	0.00273114
ENSG00000272870.1|lncRNA|AC097534.2|ENSG00000272870.1|ENSG00000272870.1|0|2495	0.58298	2.73563	8.1272	0.00469047	0.0147488
hsa_circ_0061746|circRNA|hsa_circ_0061746|hsa_circ_0061746|hsa_circ_0061746|0|572	0.582853	1.14159	6.24906	0.0130081	0.0323983
hsa_circ_0068373|circRNA|hsa_circ_0068373|hsa_circ_0068373|hsa_circ_0068373|0|600	0.58284	1.16131	5.85343	0.0161948	0.0383936
hsa_circ_0008095|circRNA|hsa_circ_0008095|hsa_circ_0008095|hsa_circ_0008095|0|600	0.582426	3.97561	9.30026	0.00251437	0.00914797
hsa_circ_0031610|circRNA|hsa_circ_0031610|hsa_circ_0031610|hsa_circ_0031610|0|600	0.582423	2.35817	6.77845	0.00972692	0.0258327
ENSG00000100351.16|mRNA|GRAP2|ENSG00000100351.16|ENSG00000100351.16|0|6190	0.582394	10.613	8.6471	0.003554	0.0118954
ENSG00000213889.10|mRNA|PPM1N|ENSG00000213889.10|ENSG00000213889.10|0|2571	0.582375	3.78126	9.06152	0.00285251	0.0100535
hsa_circ_0070204|circRNA|hsa_circ_0070204|hsa_circ_0070204|hsa_circ_0070204|0|600	0.582372	1.11277	6.18356	0.013487	0.0333538
hsa_circ_0086992|circRNA|hsa_circ_0086992|hsa_circ_0086992|hsa_circ_0086992|0|600	0.58237	2.32349	7.51193	0.00653009	0.0190191
hsa_circ_0005540|circRNA|hsa_circ_0005540|hsa_circ_0005540|hsa_circ_0005540|0|600	0.582282	2.32471	7.03677	0.0084488	0.0231758
ENSG00000258590.5|pseudogene|NBEAP1|ENSG00000258590.5|ENSG00000258590.5|0|3689	0.582257	2.55106	7.24758	0.00753455	0.0212706
hsa_circ_0075863|circRNA|hsa_circ_0075863|hsa_circ_0075863|hsa_circ_0075863|0|382	0.582196	1.04974	6.36989	0.01217	0.0308465
hsa_circ_0030567|circRNA|hsa_circ_0030567|hsa_circ_0030567|hsa_circ_0030567|0|600	0.582149	2.44459	6.42599	0.0118001	0.030131
hsa_circ_0001863|circRNA|hsa_circ_0001863|hsa_circ_0001863|hsa_circ_0001863|0|600	0.582073	1.11728	5.8823	0.015937	0.0379448
ENSG00000130830.14|mRNA|MPP1|ENSG00000130830.14|ENSG00000130830.14|0|5396	0.582049	10.2216	10.5387	0.00131357	0.00551329
hsa_circ_0072756|circRNA|hsa_circ_0072756|hsa_circ_0072756|hsa_circ_0072756|0|600	0.582029	1.13415	5.74889	0.0171653	0.0402163
hsa_circ_0088074|circRNA|hsa_circ_0088074|hsa_circ_0088074|hsa_circ_0088074|0|600	0.581812	0.950162	5.96468	0.0152244	0.0366418
hsa_circ_0071189|circRNA|hsa_circ_0071189|hsa_circ_0071189|hsa_circ_0071189|0|600	0.581801	2.05968	7.21446	0.00767116	0.0215525
ENSG00000134970.13|mRNA|TMED7|ENSG00000134970.13|ENSG00000134970.13|0|3894	0.581776	3.83725	13.021	0.000365756	0.0021289
hsa_circ_0003045|circRNA|hsa_circ_0003045|hsa_circ_0003045|hsa_circ_0003045|0|600	0.581767	3.7773	9.54285	0.00221259	0.00826655
ENSG00000270149.5|mRNA|AL591806.3|ENSG00000270149.5|ENSG00000270149.5|0|2114	0.581642	7.68585	11.5641	0.000771985	0.0036977
hsa_circ_0003338|circRNA|hsa_circ_0003338|hsa_circ_0003338|hsa_circ_0003338|0|600	0.58144	1.87318	6.92678	0.0089704	0.0242662
hsa_circ_0024065|circRNA|hsa_circ_0024065|hsa_circ_0024065|hsa_circ_0024065|0|600	0.581421	1.02552	5.76507	0.0170112	0.0399131
ENSG00000056586.15|mRNA|RC3H2|ENSG00000056586.15|ENSG00000056586.15|0|11545	0.581284	8.30763	16.2387	7.23107e-05	0.00063727
hsa_circ_0075673|circRNA|hsa_circ_0075673|hsa_circ_0075673|hsa_circ_0075673|0|600	0.58113	2.78718	7.59448	0.00624548	0.018359
ENSG00000154917.10|mRNA|RAB6B|ENSG00000154917.10|ENSG00000154917.10|0|6005	0.581078	7.02796	6.01364	0.0148166	0.0358551
ENSG00000152291.13|mRNA|TGOLN2|ENSG00000152291.13|ENSG00000152291.13|0|7081	0.581049	6.89161	13.2235	0.000329909	0.00196948
ENSG00000160014.16|mRNA|CALM3|ENSG00000160014.16|ENSG00000160014.16|0|3667	0.580826	11.2442	14.0353	0.000218534	0.00144422
hsa_circ_0007661|circRNA|hsa_circ_0007661|hsa_circ_0007661|hsa_circ_0007661|0|600	0.580791	2.05468	6.41482	0.0118728	0.0302664
hsa_circ_0001746|circRNA|hsa_circ_0001746|hsa_circ_0001746|hsa_circ_0001746|0|600	0.580695	2.33049	9.89145	0.00184232	0.00718519
ENSG00000108839.11|mRNA|ALOX12|ENSG00000108839.11|ENSG00000108839.11|0|2616	0.580664	8.67193	7.52908	0.00646988	0.0188926
ENSG00000100490.9|mRNA|CDKL1|ENSG00000100490.9|ENSG00000100490.9|0|6149	0.580646	6.31365	10.5572	0.00130103	0.00547659
ENSG00000145740.18|mRNA|SLC30A5|ENSG00000145740.18|ENSG00000145740.18|0|5784	0.580601	5.92178	10.9517	0.00105977	0.00471707
hsa_circ_0008773|circRNA|hsa_circ_0008773|hsa_circ_0008773|hsa_circ_0008773|0|542	0.580459	1.31145	5.80834	0.0166062	0.0391815
ENSG00000178852.15|mRNA|EFCAB13|ENSG00000178852.15|ENSG00000178852.15|0|6672	0.580385	9.1722	9.39647	0.00238995	0.00879152
hsa_circ_0021603|circRNA|hsa_circ_0021603|hsa_circ_0021603|hsa_circ_0021603|0|600	0.580377	1.14344	5.99564	0.0149652	0.0361575
hsa_circ_0007917|circRNA|hsa_circ_0007917|hsa_circ_0007917|hsa_circ_0007917|0|600	0.580247	1.34381	6.21466	0.0132573	0.0329041
ENSG00000162999.12|mRNA|DUSP19|ENSG00000162999.12|ENSG00000162999.12|0|5376	0.580229	2.66383	6.35943	0.0122403	0.0309736
hsa_circ_0044647|circRNA|hsa_circ_0044647|hsa_circ_0044647|hsa_circ_0044647|0|600	0.580077	1.23287	5.87444	0.0160068	0.0380519
ENSG00000282863.1|lncRNA|AC012560.1|ENSG00000282863.1|ENSG00000282863.1|0|1370	0.580041	3.91854	6.32716	0.0124598	0.0313657
ENSG00000196924.14|mRNA|FLNA|ENSG00000196924.14|ENSG00000196924.14|0|10585	0.580015	12.4816	7.74906	0.00574626	0.0172397
hsa_circ_0057104|circRNA|hsa_circ_0057104|hsa_circ_0057104|hsa_circ_0057104|0|600	0.579969	1.3792	5.58755	0.0187831	0.0430855
ENSG00000168385.17|mRNA|SEPT2|ENSG00000168385.17|ENSG00000168385.17|0|7378	0.579902	9.1682	15.9851	8.20567e-05	0.000698335
hsa_circ_0060762|circRNA|hsa_circ_0060762|hsa_circ_0060762|hsa_circ_0060762|0|600	0.579705	1.94411	6.89841	0.00911029	0.0245547
ENSG00000143595.12|mRNA|AQP10|ENSG00000143595.12|ENSG00000143595.12|0|2292	0.579581	4.58075	6.21593	0.013248	0.0328933
ENSG00000102580.14|mRNA|DNAJC3|ENSG00000102580.14|ENSG00000102580.14|0|5591	0.579575	8.55158	13.3195	0.000314179	0.00189486
ENSG00000134548.9|mRNA|SPX|ENSG00000134548.9|ENSG00000134548.9|0|3359	0.579566	7.30824	7.05484	0.00836615	0.0230029
hsa_circ_0058586|circRNA|hsa_circ_0058586|hsa_circ_0058586|hsa_circ_0058586|0|600	0.579518	1.97372	7.47588	0.00665853	0.0193368
hsa_circ_0001540|circRNA|hsa_circ_0001540|hsa_circ_0001540|hsa_circ_0001540|0|600	0.579392	3.25658	9.46372	0.00230673	0.00854526
ENSG00000105829.11|mRNA|BET1|ENSG00000105829.11|ENSG00000105829.11|0|5247	0.579072	6.41662	10.9595	0.00105552	0.00470183
ENSG00000111328.6|mRNA|CDK2AP1|ENSG00000111328.6|ENSG00000111328.6|0|3117	0.579007	7.80491	9.98144	0.00175744	0.00691911
hsa_circ_0055055|circRNA|hsa_circ_0055055|hsa_circ_0055055|hsa_circ_0055055|0|600	0.578927	1.73699	6.63278	0.010534	0.0275108
ENSG00000120727.12|mRNA|PAIP2|ENSG00000120727.12|ENSG00000120727.12|0|3158	0.578799	10.212	16.4535	6.49741e-05	0.000584532
hsa_circ_0053413|circRNA|hsa_circ_0053413|hsa_circ_0053413|hsa_circ_0053413|0|600	0.578715	1.23265	6.00726	0.0148691	0.0359493
ENSG00000044459.14|mRNA|CNTLN|ENSG00000044459.14|ENSG00000044459.14|0|11064	0.578593	8.73727	10.7953	0.00114945	0.00500562
ENSG00000134986.13|mRNA|NREP|ENSG00000134986.13|ENSG00000134986.13|0|9337	0.578291	5.80948	12.1489	0.000571361	0.00295841
hsa_circ_0006900|circRNA|hsa_circ_0006900|hsa_circ_0006900|hsa_circ_0006900|0|600	0.577878	2.49047	5.90088	0.0157733	0.0376405
ENSG00000223855.1|lncRNA|HRAT92|ENSG00000223855.1|ENSG00000223855.1|0|3506	0.577874	8.15588	7.51638	0.00651442	0.0189845
hsa_circ_0001495|circRNA|hsa_circ_0001495|hsa_circ_0001495|hsa_circ_0001495|0|600	0.577821	4.83594	9.30263	0.00251123	0.00914321
ENSG00000107745.18|mRNA|MICU1|ENSG00000107745.18|ENSG00000107745.18|0|3852	0.577713	7.16276	13.8931	0.000234844	0.00152871
hsa_circ_0001420|circRNA|hsa_circ_0001420|hsa_circ_0001420|hsa_circ_0001420|0|600	0.577663	1.20957	6.95259	0.00884509	0.0239989
ENSG00000144893.12|mRNA|MED12L|ENSG00000144893.12|ENSG00000144893.12|0|12619	0.577622	8.28133	7.77271	0.00567359	0.0170627
hsa_circ_0007259|circRNA|hsa_circ_0007259|hsa_circ_0007259|hsa_circ_0007259|0|454	0.577575	2.30658	6.8113	0.00955386	0.0254714
ENSG00000164675.10|mRNA|IQUB|ENSG00000164675.10|ENSG00000164675.10|0|5893	0.577544	3.67142	7.48535	0.00662453	0.0192604
hsa_circ_0000697|circRNA|hsa_circ_0000697|hsa_circ_0000697|hsa_circ_0000697|0|600	0.57752	1.28415	5.51875	0.0195205	0.0444093
ENSG00000265844.1|lncRNA|AC100863.1|ENSG00000265844.1|ENSG00000265844.1|0|560	0.577394	2.35216	5.92097	0.0155983	0.0373301
ENSG00000151422.12|mRNA|FER|ENSG00000151422.12|ENSG00000151422.12|0|13614	0.577223	7.97796	9.5808	0.00216884	0.00813568
hsa_circ_0069747|circRNA|hsa_circ_0069747|hsa_circ_0069747|hsa_circ_0069747|0|600	0.577127	2.02197	8.19086	0.00453333	0.0143862
ENSG00000221823.10|mRNA|PPP3R1|ENSG00000221823.10|ENSG00000221823.10|0|3363	0.577109	9.05059	14.4105	0.000180804	0.00125708
hsa_circ_0007178|circRNA|hsa_circ_0007178|hsa_circ_0007178|hsa_circ_0007178|0|600	0.576966	1.70393	8.06496	0.00484949	0.015111
hsa_circ_0000117|circRNA|hsa_circ_0000117|hsa_circ_0000117|hsa_circ_0000117|0|600	0.576964	7.4048	15.7242	9.34788e-05	0.000768511
hsa_circ_0005505|circRNA|hsa_circ_0005505|hsa_circ_0005505|hsa_circ_0005505|0|600	0.576951	4.36243	10.2953	0.00149142	0.00608687
ENSG00000130176.7|mRNA|CNN1|ENSG00000130176.7|ENSG00000130176.7|0|2887	0.576907	4.99093	5.6322	0.0183201	0.0423021
ENSG00000108576.9|mRNA|SLC6A4|ENSG00000108576.9|ENSG00000108576.9|0|6983	0.576884	5.69916	7.42378	0.00684877	0.0197625
hsa_circ_0052942|circRNA|hsa_circ_0052942|hsa_circ_0052942|hsa_circ_0052942|0|600	0.576784	1.12312	5.61258	0.0185221	0.0426291
ENSG00000050393.11|mRNA|MCUR1|ENSG00000050393.11|ENSG00000050393.11|0|6057	0.57671	9.86935	9.04836	0.00287245	0.0100971
ENSG00000092621.12|mRNA|PHGDH|ENSG00000092621.12|ENSG00000092621.12|0|9217	0.576689	3.41702	7.30785	0.00729237	0.0207307
ENSG00000185015.7|mRNA|CA13|ENSG00000185015.7|ENSG00000185015.7|0|5528	0.576508	5.50695	6.72981	0.00998901	0.0263812
ENSG00000151748.14|mRNA|SAV1|ENSG00000151748.14|ENSG00000151748.14|0|5630	0.576253	6.18889	11.8554	0.000664389	0.00331364
ENSG00000258418.1|lncRNA|AL352977.1|ENSG00000258418.1|ENSG00000258418.1|0|453	0.576135	2.5479	5.42685	0.0205527	0.0462824
hsa_circ_0008609|circRNA|hsa_circ_0008609|hsa_circ_0008609|hsa_circ_0008609|0|600	0.576038	2.34621	7.92967	0.00521454	0.0159427
ENSG00000105887.10|mRNA|MTPN|ENSG00000105887.10|ENSG00000105887.10|0|3775	0.57598	9.88423	11.2264	0.000919162	0.00423298
hsa_circ_0001522|circRNA|hsa_circ_0001522|hsa_circ_0001522|hsa_circ_0001522|0|600	0.575975	4.93972	13.3794	0.000304755	0.00185372
hsa_circ_0008031|circRNA|hsa_circ_0008031|hsa_circ_0008031|hsa_circ_0008031|0|600	0.57597	2.46394	8.26611	0.00435453	0.0139416
ENSG00000225528.3|mRNA|Z82206.1|ENSG00000225528.3|ENSG00000225528.3|0|1322	0.575913	3.43158	6.62939	0.0105535	0.0275511
hsa_circ_0004719|circRNA|hsa_circ_0004719|hsa_circ_0004719|hsa_circ_0004719|0|600	0.575798	1.7814	8.15478	0.00462171	0.0145831
ENSG00000247556.6|lncRNA|OIP5-AS1|ENSG00000247556.6|ENSG00000247556.6|0|12673	0.575699	5.80547	20.953	7.13144e-06	0.000112707
hsa_circ_0003938|circRNA|hsa_circ_0003938|hsa_circ_0003938|hsa_circ_0003938|0|566	0.575576	1.21783	6.92796	0.00896466	0.024254
ENSG00000113645.14|mRNA|WWC1|ENSG00000113645.14|ENSG00000113645.14|0|10076	0.575552	3.22122	6.41413	0.0118774	0.030274
hsa_circ_0054491|circRNA|hsa_circ_0054491|hsa_circ_0054491|hsa_circ_0054491|0|600	0.575494	1.14636	6.01586	0.0147984	0.0358284
hsa_circ_0073219|circRNA|hsa_circ_0073219|hsa_circ_0073219|hsa_circ_0073219|0|600	0.575429	2.03545	7.11559	0.00809431	0.0224317
ENSG00000204428.12|mRNA|LY6G5C|ENSG00000204428.12|ENSG00000204428.12|0|2621	0.575049	3.59377	6.91166	0.00904469	0.0244241
ENSG00000070614.14|mRNA|NDST1|ENSG00000070614.14|ENSG00000070614.14|0|9529	0.574977	6.42856	9.40016	0.0023853	0.0087825
ENSG00000134602.15|mRNA|STK26|ENSG00000134602.15|ENSG00000134602.15|0|3354	0.574868	7.50855	20.5706	8.58611e-06	0.000129637
hsa_circ_0053938|circRNA|hsa_circ_0053938|hsa_circ_0053938|hsa_circ_0053938|0|600	0.574823	1.82394	5.76275	0.0170332	0.0399443
hsa_circ_0037897|circRNA|hsa_circ_0037897|hsa_circ_0037897|hsa_circ_0037897|0|600	0.574772	1.07676	5.55462	0.0191324	0.0437253
hsa_circ_0048000|circRNA|hsa_circ_0048000|hsa_circ_0048000|hsa_circ_0048000|0|600	0.574745	1.19927	5.3893	0.0209906	0.0470782
ENSG00000142192.20|mRNA|APP|ENSG00000142192.20|ENSG00000142192.20|0|6316	0.574608	10.6811	9.03842	0.0028876	0.0101432
ENSG00000134287.9|mRNA|ARF3|ENSG00000134287.9|ENSG00000134287.9|0|5002	0.574567	8.56278	14.9666	0.000136652	0.00102003
ENSG00000171492.14|mRNA|LRRC8D|ENSG00000171492.14|ENSG00000171492.14|0|4852	0.574565	5.19141	9.60458	0.00214188	0.00806946
hsa_circ_0043286|circRNA|hsa_circ_0043286|hsa_circ_0043286|hsa_circ_0043286|0|600	0.574526	1.50632	5.27453	0.0223905	0.0494166
ENSG00000103512.14|mRNA|NOMO1|ENSG00000103512.14|ENSG00000103512.14|0|5819	0.574519	7.52949	7.44743	0.00676174	0.0195567
ENSG00000279276.1|lncRNA|AC130454.1|ENSG00000279276.1|ENSG00000279276.1|0|401	0.574507	2.0901	6.1886	0.0134495	0.0332845
hsa_circ_0042989|circRNA|hsa_circ_0042989|hsa_circ_0042989|hsa_circ_0042989|0|600	0.574429	1.24664	5.53238	0.019372	0.044141
hsa_circ_0070206|circRNA|hsa_circ_0070206|hsa_circ_0070206|hsa_circ_0070206|0|600	0.5744	2.03238	6.22999	0.0131456	0.0327002
ENSG00000005961.17|mRNA|ITGA2B|ENSG00000005961.17|ENSG00000005961.17|0|5551	0.574369	11.2574	5.02093	0.02584	0.0553755
hsa_circ_0002798|circRNA|hsa_circ_0002798|hsa_circ_0002798|hsa_circ_0002798|0|600	0.574347	2.94825	6.40675	0.0119257	0.0303506
ENSG00000165929.12|mRNA|TC2N|ENSG00000165929.12|ENSG00000165929.12|0|6147	0.574182	8.55099	10.4906	0.00134691	0.00561307
ENSG00000204130.12|mRNA|RUFY2|ENSG00000204130.12|ENSG00000204130.12|0|8137	0.574163	6.63797	22.1227	4.05097e-06	7.2987e-05
hsa_circ_0087659|circRNA|hsa_circ_0087659|hsa_circ_0087659|hsa_circ_0087659|0|600	0.574117	2.70305	6.96424	0.00878913	0.023886
hsa_circ_0038082|circRNA|hsa_circ_0038082|hsa_circ_0038082|hsa_circ_0038082|0|600	0.574022	1.10037	5.65931	0.0180448	0.041786
ENSG00000177076.5|mRNA|ACER2|ENSG00000177076.5|ENSG00000177076.5|0|2238	0.573748	5.51024	7.99116	0.00504525	0.0155703
ENSG00000142875.19|mRNA|PRKACB|ENSG00000142875.19|ENSG00000142875.19|0|6730	0.573668	9.12845	13.5283	0.000282553	0.00174907
hsa_circ_0008023|circRNA|hsa_circ_0008023|hsa_circ_0008023|hsa_circ_0008023|0|600	0.573661	2.76257	7.40277	0.00692705	0.0199408
hsa_circ_0056401|circRNA|hsa_circ_0056401|hsa_circ_0056401|hsa_circ_0056401|0|600	0.573659	1.15514	6.4035	0.011947	0.0303972
hsa_circ_0011536|circRNA|hsa_circ_0011536|hsa_circ_0011536|hsa_circ_0011536|0|600	0.573608	3.51887	9.03148	0.00289823	0.0101594
ENSG00000272822.1|mRNA|AC073610.3|ENSG00000272822.1|ENSG00000272822.1|0|939	0.57355	8.55617	14.9228	0.000139699	0.00103775
ENSG00000168904.14|mRNA|LRRC28|ENSG00000168904.14|ENSG00000168904.14|0|9279	0.573527	5.3249	11.6041	0.000756241	0.00364065
hsa_circ_0012990|circRNA|hsa_circ_0012990|hsa_circ_0012990|hsa_circ_0012990|0|600	0.573489	3.63744	8.87118	0.00315519	0.0108165
hsa_circ_0012440|circRNA|hsa_circ_0012440|hsa_circ_0012440|hsa_circ_0012440|0|600	0.57337	3.27294	8.07815	0.00481533	0.0150324
hsa_circ_0068398|circRNA|hsa_circ_0068398|hsa_circ_0068398|hsa_circ_0068398|0|600	0.573234	2.20681	6.46473	0.0115515	0.0295909
ENSG00000163322.13|mRNA|ABRAXAS1|ENSG00000163322.13|ENSG00000163322.13|0|7777	0.573225	6.38089	16.0182	8.07148e-05	0.000690629
hsa_circ_0075275|circRNA|hsa_circ_0075275|hsa_circ_0075275|hsa_circ_0075275|0|600	0.573096	3.87849	8.18546	0.00454644	0.0144202
hsa_circ_0006639|circRNA|hsa_circ_0006639|hsa_circ_0006639|hsa_circ_0006639|0|600	0.573037	1.87011	7.7914	0.00561683	0.0169303
ENSG00000231652.2|lncRNA|AL590428.1|ENSG00000231652.2|ENSG00000231652.2|0|1973	0.573009	3.19747	5.31867	0.0218409	0.0485583
ENSG00000100614.17|mRNA|PPM1A|ENSG00000100614.17|ENSG00000100614.17|0|11860	0.572991	8.77561	14.7612	0.000151522	0.00110497
ENSG00000196776.14|mRNA|CD47|ENSG00000196776.14|ENSG00000196776.14|0|7895	0.572912	7.48905	11.3762	0.00085066	0.00398179
hsa_circ_0075806|circRNA|hsa_circ_0075806|hsa_circ_0075806|hsa_circ_0075806|0|600	0.572834	1.19185	5.20636	0.0232676	0.050933
ENSG00000251600.6|lncRNA|AC139713.2|ENSG00000251600.6|ENSG00000251600.6|0|12703	0.572772	8.57625	6.53448	0.0111174	0.0287177
ENSG00000156787.16|mRNA|TBC1D31|ENSG00000156787.16|ENSG00000156787.16|0|8611	0.572583	7.20528	17.4063	4.04997e-05	0.000410242
ENSG00000123191.14|mRNA|ATP7B|ENSG00000123191.14|ENSG00000123191.14|0|9671	0.572569	2.40622	7.82439	0.00551803	0.0166804
hsa_circ_0066993|circRNA|hsa_circ_0066993|hsa_circ_0066993|hsa_circ_0066993|0|600	0.572561	1.36396	6.28509	0.0127521	0.0319276
hsa_circ_0008571|circRNA|hsa_circ_0008571|hsa_circ_0008571|hsa_circ_0008571|0|600	0.572528	1.2311	6.09194	0.0141879	0.0346785
ENSG00000068366.19|mRNA|ACSL4|ENSG00000068366.19|ENSG00000068366.19|0|6415	0.5724	7.20936	17.9211	3.1406e-05	0.000338957
ENSG00000188681.11|pseudogene|TEKT4P2|ENSG00000188681.11|ENSG00000188681.11|0|2309	0.5724	2.68463	6.29912	0.0126539	0.0317381
hsa_circ_0001747|circRNA|hsa_circ_0001747|hsa_circ_0001747|hsa_circ_0001747|0|600	0.572341	2.23023	7.86739	0.00539195	0.0163837
ENSG00000069020.18|mRNA|MAST4|ENSG00000069020.18|ENSG00000069020.18|0|14675	0.572326	7.22113	9.52768	0.00223033	0.00832096
hsa_circ_0016394|circRNA|hsa_circ_0016394|hsa_circ_0016394|hsa_circ_0016394|0|600	0.572298	1.20019	6.96782	0.00877201	0.0238497
hsa_circ_0001767|circRNA|hsa_circ_0001767|hsa_circ_0001767|hsa_circ_0001767|0|572	0.572229	2.55935	7.56538	0.0063443	0.0185893
hsa_circ_0085426|circRNA|hsa_circ_0085426|hsa_circ_0085426|hsa_circ_0085426|0|600	0.572137	1.67438	6.52726	0.0111615	0.0288028
ENSG00000152253.8|mRNA|SPC25|ENSG00000152253.8|ENSG00000152253.8|0|1841	0.571965	3.15696	8.50728	0.00382864	0.0126031
ENSG00000188921.13|mRNA|HACD4|ENSG00000188921.13|ENSG00000188921.13|0|9152	0.571893	8.25347	6.84906	0.0093589	0.0250487
ENSG00000146858.7|mRNA|ZC3HAV1L|ENSG00000146858.7|ENSG00000146858.7|0|1753	0.571848	4.67477	8.82067	0.00324089	0.0110457
ENSG00000006715.15|mRNA|VPS41|ENSG00000006715.15|ENSG00000006715.15|0|7801	0.57183	7.79244	20.018	1.12354e-05	0.000158008
ENSG00000169247.11|mRNA|SH3TC2|ENSG00000169247.11|ENSG00000169247.11|0|15047	0.571788	5.67494	6.7774	0.0097325	0.0258441
hsa_circ_0086731|circRNA|hsa_circ_0086731|hsa_circ_0086731|hsa_circ_0086731|0|600	0.57168	1.6219	8.23161	0.00443559	0.0141345
hsa_circ_0071186|circRNA|hsa_circ_0071186|hsa_circ_0071186|hsa_circ_0071186|0|600	0.571566	3.47122	6.80498	0.00958693	0.0255459
hsa_circ_0036926|circRNA|hsa_circ_0036926|hsa_circ_0036926|hsa_circ_0036926|0|600	0.571565	1.09794	5.13145	0.024273	0.0526968
hsa_circ_0007578|circRNA|hsa_circ_0007578|hsa_circ_0007578|hsa_circ_0007578|0|600	0.57142	1.77883	7.13434	0.00801226	0.0222911
ENSG00000134070.4|mRNA|IRAK2|ENSG00000134070.4|ENSG00000134070.4|0|3483	0.571414	4.2323	11.1734	0.00094474	0.00432373
ENSG00000245694.9|lncRNA|CRNDE|ENSG00000245694.9|ENSG00000245694.9|0|5846	0.571392	1.89558	6.65254	0.0104205	0.0272789
ENSG00000237854.3|pseudogene|LINC00674|ENSG00000237854.3|ENSG00000237854.3|0|734	0.571313	6.55638	12.6557	0.00044072	0.00244783
hsa_circ_0013093|circRNA|hsa_circ_0013093|hsa_circ_0013093|hsa_circ_0013093|0|600	0.571265	2.91614	8.57123	0.00370042	0.0122681
hsa_circ_0054665|circRNA|hsa_circ_0054665|hsa_circ_0054665|hsa_circ_0054665|0|600	0.571232	1.74389	7.54677	0.00640836	0.0187494
hsa_circ_0030256|circRNA|hsa_circ_0030256|hsa_circ_0030256|hsa_circ_0030256|0|600	0.571127	1.25878	5.90632	0.0157257	0.0375404
ENSG00000235254.3|pseudogene|TMEM185AP1|ENSG00000235254.3|ENSG00000235254.3|0|546	0.570794	2.65978	6.35351	0.0122803	0.0310432
ENSG00000138448.11|mRNA|ITGAV|ENSG00000138448.11|ENSG00000138448.11|0|8211	0.570695	3.61827	11.9582	0.000630169	0.00318841
hsa_circ_0057953|circRNA|hsa_circ_0057953|hsa_circ_0057953|hsa_circ_0057953|0|600	0.57064	0.976419	5.70418	0.0175985	0.0410049
ENSG00000117592.8|mRNA|PRDX6|ENSG00000117592.8|ENSG00000117592.8|0|2367	0.570588	9.39146	11.8822	0.000655289	0.0032822
ENSG00000116688.16|mRNA|MFN2|ENSG00000116688.16|ENSG00000116688.16|0|4973	0.570561	8.4696	8.99783	0.00295034	0.0102983
ENSG00000124406.16|mRNA|ATP8A1|ENSG00000124406.16|ENSG00000124406.16|0|11199	0.57034	8.44213	9.03638	0.00289072	0.0101441
hsa_circ_0002434|circRNA|hsa_circ_0002434|hsa_circ_0002434|hsa_circ_0002434|0|600	0.570272	2.83892	9.17887	0.00268085	0.00960472
ENSG00000224846.2|lncRNA|AL133351.1|ENSG00000224846.2|ENSG00000224846.2|0|539	0.570265	5.49461	6.21715	0.0132391	0.0328875
ENSG00000224533.4|lncRNA|TMLHE-AS1|ENSG00000224533.4|ENSG00000224533.4|0|1845	0.570159	2.2542	7.11875	0.0080804	0.0224156
ENSG00000224892.6|pseudogene|RPS4XP16|ENSG00000224892.6|ENSG00000224892.6|0|997	0.570131	1.86224	6.48884	0.0113995	0.0292903
hsa_circ_0086459|circRNA|hsa_circ_0086459|hsa_circ_0086459|hsa_circ_0086459|0|600	0.570047	1.24142	5.90404	0.0157457	0.0375835
hsa_circ_0087862|circRNA|hsa_circ_0087862|hsa_circ_0087862|hsa_circ_0087862|0|600	0.569906	1.65117	6.14223	0.0137986	0.0339519
hsa_circ_0003930|circRNA|hsa_circ_0003930|hsa_circ_0003930|hsa_circ_0003930|0|600	0.569808	0.976524	5.28523	0.0222559	0.0491964
ENSG00000273398.6|mRNA|AC017083.4|ENSG00000273398.6|ENSG00000273398.6|0|2306	0.569803	9.06322	14.5002	0.000172811	0.00121879
hsa_circ_0006701|circRNA|hsa_circ_0006701|hsa_circ_0006701|hsa_circ_0006701|0|600	0.569756	1.90907	6.07797	0.014298	0.0348793
ENSG00000140859.15|mRNA|KIFC3|ENSG00000140859.15|ENSG00000140859.15|0|9600	0.569743	6.65165	9.23808	0.00259829	0.0093831
hsa_circ_0074081|circRNA|hsa_circ_0074081|hsa_circ_0074081|hsa_circ_0074081|0|600	0.569631	0.873782	5.14344	0.0241092	0.0524325
ENSG00000143363.15|mRNA|PRUNE1|ENSG00000143363.15|ENSG00000143363.15|0|3063	0.569568	8.42454	9.53827	0.00221793	0.00827937
ENSG00000155158.20|mRNA|TTC39B|ENSG00000155158.20|ENSG00000155158.20|0|12208	0.569389	5.98649	10.2614	0.00151803	0.00616635
hsa_circ_0058040|circRNA|hsa_circ_0058040|hsa_circ_0058040|hsa_circ_0058040|0|600	0.569356	0.962041	5.12966	0.0242976	0.0527387
hsa_circ_0008457|circRNA|hsa_circ_0008457|hsa_circ_0008457|hsa_circ_0008457|0|448	0.569221	0.980657	6.09424	0.0141698	0.0346514
hsa_circ_0057041|circRNA|hsa_circ_0057041|hsa_circ_0057041|hsa_circ_0057041|0|600	0.569078	3.48811	7.40758	0.00690905	0.0199048
hsa_circ_0005388|circRNA|hsa_circ_0005388|hsa_circ_0005388|hsa_circ_0005388|0|600	0.568986	1.59877	6.50089	0.0113243	0.029155
ENSG00000140941.12|mRNA|MAP1LC3B|ENSG00000140941.12|ENSG00000140941.12|0|5313	0.568981	8.73233	12.514	0.000473849	0.0025801
hsa_circ_0069859|circRNA|hsa_circ_0069859|hsa_circ_0069859|hsa_circ_0069859|0|456	0.568968	1.00891	4.82267	0.0289217	0.0605038
hsa_circ_0017439|circRNA|hsa_circ_0017439|hsa_circ_0017439|hsa_circ_0017439|0|600	0.568926	1.31112	5.58314	0.0188295	0.0431673
ENSG00000067225.17|mRNA|PKM|ENSG00000067225.17|ENSG00000067225.17|0|8571	0.568886	10.957	11.8794	0.000656232	0.00328381
ENSG00000061676.14|mRNA|NCKAP1|ENSG00000061676.14|ENSG00000061676.14|0|22520	0.568828	8.20495	9.75189	0.0019823	0.00758287
ENSG00000143889.15|mRNA|HNRNPLL|ENSG00000143889.15|ENSG00000143889.15|0|5923	0.568817	6.52985	12.3356	0.000519183	0.00275768
hsa_circ_0009090|circRNA|hsa_circ_0009090|hsa_circ_0009090|hsa_circ_0009090|0|600	0.568792	2.37818	7.15965	0.00790283	0.0220636
hsa_circ_0032829|circRNA|hsa_circ_0032829|hsa_circ_0032829|hsa_circ_0032829|0|600	0.568695	1.07821	5.22928	0.0229688	0.0504142
hsa_circ_0005966|circRNA|hsa_circ_0005966|hsa_circ_0005966|hsa_circ_0005966|0|600	0.568659	2.40224	6.56366	0.0109408	0.0283247
ENSG00000100979.14|mRNA|PLTP|ENSG00000100979.14|ENSG00000100979.14|0|2541	0.568652	3.71804	8.88541	0.00313146	0.0107629
ENSG00000233822.4|mRNA|HIST1H2BN|ENSG00000233822.4|ENSG00000233822.4|0|5477	0.568575	6.21659	6.27766	0.0128044	0.0320191
ENSG00000114098.17|mRNA|ARMC8|ENSG00000114098.17|ENSG00000114098.17|0|9848	0.568095	7.88554	13.483	0.000289137	0.0017809
hsa_circ_0036962|circRNA|hsa_circ_0036962|hsa_circ_0036962|hsa_circ_0036962|0|600	0.568007	0.941946	5.96585	0.0152145	0.0366225
ENSG00000112299.7|mRNA|VNN1|ENSG00000112299.7|ENSG00000112299.7|0|3106	0.567998	4.34538	7.40843	0.00690589	0.0198986
hsa_circ_0013084|circRNA|hsa_circ_0013084|hsa_circ_0013084|hsa_circ_0013084|0|600	0.56797	2.62596	9.00026	0.00294654	0.0102886
hsa_circ_0068851|circRNA|hsa_circ_0068851|hsa_circ_0068851|hsa_circ_0068851|0|600	0.567918	2.97357	7.81223	0.00555423	0.0167695
hsa_circ_0006577|circRNA|hsa_circ_0006577|hsa_circ_0006577|hsa_circ_0006577|0|600	0.567904	7.24558	7.12666	0.00804574	0.0223542
ENSG00000236397.3|pseudogene|DDX11L2|ENSG00000236397.3|ENSG00000236397.3|0|1398	0.567894	3.33943	5.76357	0.0170254	0.0399308
ENSG00000188641.12|mRNA|DPYD|ENSG00000188641.12|ENSG00000188641.12|0|6443	0.567856	8.14274	14.7239	0.000154395	0.00111903
ENSG00000150712.10|mRNA|MTMR12|ENSG00000150712.10|ENSG00000150712.10|0|5545	0.567838	7.79142	13.4412	0.000295344	0.00180972
hsa_circ_0025850|circRNA|hsa_circ_0025850|hsa_circ_0025850|hsa_circ_0025850|0|600	0.567794	3.18986	7.57052	0.00632673	0.0185514
ENSG00000169313.9|mRNA|P2RY12|ENSG00000169313.9|ENSG00000169313.9|0|1859	0.567726	7.59559	5.78415	0.0168314	0.039589
hsa_circ_0004813|circRNA|hsa_circ_0004813|hsa_circ_0004813|hsa_circ_0004813|0|600	0.567609	5.81649	7.06655	0.00831303	0.022901
ENSG00000101745.16|mRNA|ANKRD12|ENSG00000101745.16|ENSG00000101745.16|0|12252	0.567607	10.2215	17.2227	4.4352e-05	0.000439663
ENSG00000166681.13|mRNA|BEX3|ENSG00000166681.13|ENSG00000166681.13|0|1080	0.567462	9.71324	9.73814	0.00199668	0.00762497
hsa_circ_0007504|circRNA|hsa_circ_0007504|hsa_circ_0007504|hsa_circ_0007504|0|600	0.567413	1.08416	5.8233	0.0164686	0.0389408
ENSG00000150667.6|mRNA|FSIP1|ENSG00000150667.6|ENSG00000150667.6|0|2951	0.567387	3.10944	9.37904	0.00241201	0.0088547
ENSG00000254975.1|lncRNA|AP001189.4|ENSG00000254975.1|ENSG00000254975.1|0|452	0.567325	3.6941	5.26377	0.0225266	0.0496511
hsa_circ_0042755|circRNA|hsa_circ_0042755|hsa_circ_0042755|hsa_circ_0042755|0|600	0.567263	0.877296	4.52492	0.0590531	0.106899
hsa_circ_0087641|circRNA|hsa_circ_0087641|hsa_circ_0087641|hsa_circ_0087641|0|600	0.567091	3.42082	7.77196	0.00567588	0.017067
ENSG00000100504.16|mRNA|PYGL|ENSG00000100504.16|ENSG00000100504.16|0|4798	0.566999	8.41026	13.0212	0.000365714	0.0021289
ENSG00000264964.1|lncRNA|AP001033.1|ENSG00000264964.1|ENSG00000264964.1|0|466	0.566983	4.04553	6.10562	0.0140808	0.0344774
ENSG00000143418.19|mRNA|CERS2|ENSG00000143418.19|ENSG00000143418.19|0|4644	0.566945	7.60036	12.1073	0.00058371	0.00300519
ENSG00000132824.13|mRNA|SERINC3|ENSG00000132824.13|ENSG00000132824.13|0|4683	0.566896	8.08815	10.3568	0.00144426	0.00593076
ENSG00000254912.2|pseudogene|AC135983.3|ENSG00000254912.2|ENSG00000254912.2|0|1226	0.56667	4.15147	9.77406	0.00195936	0.00752251
hsa_circ_0032833|circRNA|hsa_circ_0032833|hsa_circ_0032833|hsa_circ_0032833|0|600	0.566401	1.00993	5.42772	0.0205427	0.0462703
hsa_circ_0056576|circRNA|hsa_circ_0056576|hsa_circ_0056576|hsa_circ_0056576|0|600	0.566322	2.21318	8.02796	0.00494664	0.0153319
hsa_circ_0004379|circRNA|hsa_circ_0004379|hsa_circ_0004379|hsa_circ_0004379|0|600	0.566016	1.01279	5.68349	0.0178029	0.0413941
ENSG00000075151.20|mRNA|EIF4G3|ENSG00000075151.20|ENSG00000075151.20|0|9596	0.56601	10.2564	10.2487	0.00152812	0.0061948
ENSG00000236166.1|lncRNA|AL021408.1|ENSG00000236166.1|ENSG00000236166.1|0|746	0.565978	2.6044	6.79939	0.00961622	0.0255921
hsa_circ_0034518|circRNA|hsa_circ_0034518|hsa_circ_0034518|hsa_circ_0034518|0|600	0.565853	1.35522	6.42146	0.0118296	0.0301908
ENSG00000129226.13|mRNA|CD68|ENSG00000129226.13|ENSG00000129226.13|0|2189	0.565816	9.32599	15.9796	8.22828e-05	0.000699843
ENSG00000227071.1|lncRNA|FOCAD-AS1|ENSG00000227071.1|ENSG00000227071.1|0|423	0.565779	2.33531	4.95153	0.0268777	0.0571023
hsa_circ_0027669|circRNA|hsa_circ_0027669|hsa_circ_0027669|hsa_circ_0027669|0|600	0.565774	1.03613	5.91438	0.0156555	0.0374086
ENSG00000180530.10|mRNA|NRIP1|ENSG00000180530.10|ENSG00000180530.10|0|8497	0.565715	8.48714	8.98208	0.00297505	0.0103538
hsa_circ_0075672|circRNA|hsa_circ_0075672|hsa_circ_0075672|hsa_circ_0075672|0|600	0.565682	1.05612	6.01906	0.0147722	0.0357866
ENSG00000022267.16|mRNA|FHL1|ENSG00000022267.16|ENSG00000022267.16|0|5997	0.565682	7.51992	8.3894	0.00407702	0.0132402
ENSG00000106366.8|mRNA|SERPINE1|ENSG00000106366.8|ENSG00000106366.8|0|3190	0.565551	4.23044	7.9538	0.00514742	0.0157907
ENSG00000187010.19|mRNA|RHD|ENSG00000187010.19|ENSG00000187010.19|0|3313	0.565488	5.18744	9.23014	0.00260921	0.00941231
hsa_circ_0001414|circRNA|hsa_circ_0001414|hsa_circ_0001414|hsa_circ_0001414|0|600	0.565424	4.10718	7.24347	0.00755137	0.021297
hsa_circ_0004298|circRNA|hsa_circ_0004298|hsa_circ_0004298|hsa_circ_0004298|0|600	0.56535	1.49119	7.27473	0.00742446	0.0210312
ENSG00000100345.20|mRNA|MYH9|ENSG00000100345.20|ENSG00000100345.20|0|8959	0.565192	13.1217	10.3948	0.00141595	0.00583856
hsa_circ_0083722|circRNA|hsa_circ_0083722|hsa_circ_0083722|hsa_circ_0083722|0|584	0.56514	2.61446	5.77871	0.0168825	0.0396823
hsa_circ_0029909|circRNA|hsa_circ_0029909|hsa_circ_0029909|hsa_circ_0029909|0|600	0.565122	1.0889	5.67992	0.0178384	0.0414476
hsa_circ_0001982|circRNA|hsa_circ_0001982|hsa_circ_0001982|hsa_circ_0001982|0|600	0.565103	1.30721	6.27592	0.0128167	0.0320338
hsa_circ_0011120|circRNA|hsa_circ_0011120|hsa_circ_0011120|hsa_circ_0011120|0|568	0.565054	1.0058	5.87171	0.016031	0.0380995
ENSG00000279673.1|lncRNA|AC092919.2|ENSG00000279673.1|ENSG00000279673.1|0|1645	0.565007	4.86042	6.28749	0.0127352	0.031894
hsa_circ_0003786|circRNA|hsa_circ_0003786|hsa_circ_0003786|hsa_circ_0003786|0|450	0.564904	1.06365	5.42905	0.0205273	0.0462462
ENSG00000125354.22|mRNA|SEPT6|ENSG00000125354.22|ENSG00000125354.22|0|6245	0.564881	9.33381	18.9808	1.86532e-05	0.000229229
ENSG00000149289.10|mRNA|ZC3H12C|ENSG00000149289.10|ENSG00000149289.10|0|9719	0.564714	3.82522	8.34971	0.00416434	0.0134528
hsa_circ_0052172|circRNA|hsa_circ_0052172|hsa_circ_0052172|hsa_circ_0052172|0|600	0.564706	1.59326	6.64379	0.0104706	0.0273911
hsa_circ_0007455|circRNA|hsa_circ_0007455|hsa_circ_0007455|hsa_circ_0007455|0|600	0.564683	4.41987	7.09616	0.00818026	0.0226102
ENSG00000085117.11|mRNA|CD82|ENSG00000085117.11|ENSG00000085117.11|0|4054	0.564633	5.99498	9.13879	0.00273827	0.00974046
hsa_circ_0004950|circRNA|hsa_circ_0004950|hsa_circ_0004950|hsa_circ_0004950|0|600	0.564615	4.33243	11.6616	0.000734145	0.00357571
ENSG00000162929.13|mRNA|KIAA1841|ENSG00000162929.13|ENSG00000162929.13|0|7992	0.564474	7.73924	15.545	0.000102245	0.000820636
ENSG00000181804.14|mRNA|SLC9A9|ENSG00000181804.14|ENSG00000181804.14|0|4087	0.564323	7.70772	7.40892	0.00690402	0.0198961
ENSG00000164291.16|mRNA|ARSK|ENSG00000164291.16|ENSG00000164291.16|0|4314	0.56429	3.37256	7.6502	0.00606058	0.0179558
ENSG00000176472.10|mRNA|ZNF575|ENSG00000176472.10|ENSG00000176472.10|0|3222	0.564199	2.16563	6.01958	0.0147679	0.0357807
ENSG00000185305.10|mRNA|ARL15|ENSG00000185305.10|ENSG00000185305.10|0|3797	0.564183	6.5009	7.52371	0.00648868	0.0189289
hsa_circ_0024067|circRNA|hsa_circ_0024067|hsa_circ_0024067|hsa_circ_0024067|0|600	0.563982	2.93398	7.35331	0.00711498	0.0203365
ENSG00000133318.13|mRNA|RTN3|ENSG00000133318.13|ENSG00000133318.13|0|5792	0.563971	7.59958	9.84816	0.00188463	0.0073116
hsa_circ_0032115|circRNA|hsa_circ_0032115|hsa_circ_0032115|hsa_circ_0032115|0|600	0.563826	1.94423	5.6671	0.0179665	0.0416628
hsa_circ_0042759|circRNA|hsa_circ_0042759|hsa_circ_0042759|hsa_circ_0042759|0|600	0.56359	0.961647	5.20812	0.0232446	0.0508907
hsa_circ_0036927|circRNA|hsa_circ_0036927|hsa_circ_0036927|hsa_circ_0036927|0|600	0.563381	1.42381	6.48442	0.0114272	0.0293478
ENSG00000175471.19|mRNA|MCTP1|ENSG00000175471.19|ENSG00000175471.19|0|12089	0.5632	9.16329	14.5845	0.000165622	0.00118239
hsa_circ_0006018|circRNA|hsa_circ_0006018|hsa_circ_0006018|hsa_circ_0006018|0|600	0.563016	1.71005	6.24767	0.013018	0.032419
hsa_circ_0008858|circRNA|hsa_circ_0008858|hsa_circ_0008858|hsa_circ_0008858|0|600	0.562942	1.73481	4.4619	0.0355592	0.0713295
hsa_circ_0029636|circRNA|hsa_circ_0029636|hsa_circ_0029636|hsa_circ_0029636|0|600	0.562795	1.82962	6.7362	0.00995418	0.0263101
ENSG00000134222.16|mRNA|PSRC1|ENSG00000134222.16|ENSG00000134222.16|0|2855	0.562762	3.45203	9.07688	0.00282942	0.00998633
hsa_circ_0027668|circRNA|hsa_circ_0027668|hsa_circ_0027668|hsa_circ_0027668|0|600	0.562746	2.24085	7.13196	0.00802262	0.0223074
hsa_circ_0003550|circRNA|hsa_circ_0003550|hsa_circ_0003550|hsa_circ_0003550|0|600	0.562718	3.88863	10.3751	0.00143055	0.00588175
hsa_circ_0003100|circRNA|hsa_circ_0003100|hsa_circ_0003100|hsa_circ_0003100|0|600	0.562714	1.46537	6.57078	0.0108981	0.028233
hsa_circ_0002025|circRNA|hsa_circ_0002025|hsa_circ_0002025|hsa_circ_0002025|0|600	0.56271	1.4745	6.82541	0.00948056	0.0253142
ENSG00000273107.1|lncRNA|AL512598.1|ENSG00000273107.1|ENSG00000273107.1|0|273	0.562708	1.75059	5.91916	0.015614	0.0373452
hsa_circ_0029630|circRNA|hsa_circ_0029630|hsa_circ_0029630|hsa_circ_0029630|0|600	0.562625	1.01301	5.78954	0.0167809	0.0395075
hsa_circ_0007271|circRNA|hsa_circ_0007271|hsa_circ_0007271|hsa_circ_0007271|0|600	0.562542	1.38974	6.71517	0.0100693	0.0265613
ENSG00000145703.15|mRNA|IQGAP2|ENSG00000145703.15|ENSG00000145703.15|0|7904	0.562473	9.85931	13.6582	0.000264526	0.00166803
ENSG00000070413.19|mRNA|DGCR2|ENSG00000070413.19|ENSG00000070413.19|0|5605	0.562427	4.03727	9.05767	0.00285833	0.0100634
hsa_circ_0000179|circRNA|hsa_circ_0000179|hsa_circ_0000179|hsa_circ_0000179|0|564	0.562402	1.5963	6.18195	0.013499	0.0333753
hsa_circ_0081820|circRNA|hsa_circ_0081820|hsa_circ_0081820|hsa_circ_0081820|0|600	0.562398	2.02696	7.01134	0.00856657	0.0234151
ENSG00000138376.10|mRNA|BARD1|ENSG00000138376.10|ENSG00000138376.10|0|6067	0.562377	6.57958	10.8779	0.00110114	0.00484714
ENSG00000013016.15|mRNA|EHD3|ENSG00000013016.15|ENSG00000013016.15|0|4636	0.562351	6.48743	9.83614	0.00189655	0.00734642
hsa_circ_0084606|circRNA|hsa_circ_0084606|hsa_circ_0084606|hsa_circ_0084606|0|600	0.562138	4.91477	7.62215	0.00615293	0.0181515
ENSG00000108825.17|mRNA|PTGES3L-AARSD1|ENSG00000108825.17|ENSG00000108825.17|0|2383	0.562079	5.8548	20.0776	1.09138e-05	0.000155837
ENSG00000121964.14|mRNA|GTDC1|ENSG00000121964.14|ENSG00000121964.14|0|14162	0.562051	8.06677	10.6396	0.00124638	0.00530983
hsa_circ_0086645|circRNA|hsa_circ_0086645|hsa_circ_0086645|hsa_circ_0086645|0|600	0.562022	1.17981	4.59982	0.0328504	0.0669079
hsa_circ_0067107|circRNA|hsa_circ_0067107|hsa_circ_0067107|hsa_circ_0067107|0|434	0.561907	2.14978	6.78577	0.00968809	0.025757
hsa_circ_0065301|circRNA|hsa_circ_0065301|hsa_circ_0065301|hsa_circ_0065301|0|600	0.561898	1.6841	6.11576	0.0140021	0.0343254
hsa_circ_0007793|circRNA|hsa_circ_0007793|hsa_circ_0007793|hsa_circ_0007793|0|568	0.561813	4.82371	9.73624	0.00199867	0.00762937
ENSG00000254810.1|lncRNA|AP001189.3|ENSG00000254810.1|ENSG00000254810.1|0|651	0.561755	5.81025	6.00566	0.0148823	0.0359747
ENSG00000127947.15|mRNA|PTPN12|ENSG00000127947.15|ENSG00000127947.15|0|5547	0.561641	11.0002	9.93738	0.00179849	0.00705427
ENSG00000115758.12|mRNA|ODC1|ENSG00000115758.12|ENSG00000115758.12|0|2968	0.561518	9.70055	11.1662	0.000948264	0.0043329
hsa_circ_0038645|circRNA|hsa_circ_0038645|hsa_circ_0038645|hsa_circ_0038645|0|600	0.561481	1.11638	5.6543	0.0180954	0.0418789
hsa_circ_0079624|circRNA|hsa_circ_0079624|hsa_circ_0079624|hsa_circ_0079624|0|600	0.561446	1.21927	5.93259	0.015498	0.0371569
hsa_circ_0023694|circRNA|hsa_circ_0023694|hsa_circ_0023694|hsa_circ_0023694|0|600	0.561384	4.6545	12.0779	0.000592573	0.00303821
hsa_circ_0007769|circRNA|hsa_circ_0007769|hsa_circ_0007769|hsa_circ_0007769|0|600	0.561378	1.84126	7.12629	0.00804739	0.0223542
ENSG00000254703.2|lncRNA|SENCR|ENSG00000254703.2|ENSG00000254703.2|0|1298	0.561376	6.48325	7.14162	0.00798064	0.0222351
hsa_circ_0006784|circRNA|hsa_circ_0006784|hsa_circ_0006784|hsa_circ_0006784|0|600	0.561364	2.77369	6.41366	0.0118804	0.030278
hsa_circ_0070224|circRNA|hsa_circ_0070224|hsa_circ_0070224|hsa_circ_0070224|0|600	0.561257	1.20787	5.29283	0.0221609	0.0490511
ENSG00000162852.13|mRNA|CNST|ENSG00000162852.13|ENSG00000162852.13|0|5922	0.561176	8.98822	7.05721	0.00835535	0.0229803
ENSG00000274874.1|mRNA|AC068790.8|ENSG00000274874.1|ENSG00000274874.1|0|504	0.560943	5.90011	14.0058	0.000221824	0.00146042
hsa_circ_0013013|circRNA|hsa_circ_0013013|hsa_circ_0013013|hsa_circ_0013013|0|600	0.560925	1.791	5.66468	0.0179907	0.0416996
ENSG00000122299.11|mRNA|ZC3H7A|ENSG00000122299.11|ENSG00000122299.11|0|7076	0.560915	7.66548	17.5484	3.77521e-05	0.000388326
ENSG00000235609.7|lncRNA|AF127577.4|ENSG00000235609.7|ENSG00000235609.7|0|5929	0.560913	8.21596	8.15959	0.00460983	0.0145618
hsa_circ_0047920|circRNA|hsa_circ_0047920|hsa_circ_0047920|hsa_circ_0047920|0|600	0.560828	4.94933	6.61015	0.0106654	0.0277451
hsa_circ_0075872|circRNA|hsa_circ_0075872|hsa_circ_0075872|hsa_circ_0075872|0|600	0.560805	1.79751	5.62395	0.0184048	0.0424554
ENSG00000243244.5|mRNA|STON1|ENSG00000243244.5|ENSG00000243244.5|0|7709	0.560702	4.66239	8.16518	0.00459606	0.0145298
hsa_circ_0049222|circRNA|hsa_circ_0049222|hsa_circ_0049222|hsa_circ_0049222|0|600	0.560656	1.06627	5.65933	0.0180446	0.041786
hsa_circ_0044650|circRNA|hsa_circ_0044650|hsa_circ_0044650|hsa_circ_0044650|0|600	0.560621	1.20722	6.00715	0.01487	0.0359493
hsa_circ_0004577|circRNA|hsa_circ_0004577|hsa_circ_0004577|hsa_circ_0004577|0|600	0.560594	2.10295	6.80042	0.00961084	0.0255921
ENSG00000183726.10|mRNA|TMEM50A|ENSG00000183726.10|ENSG00000183726.10|0|3410	0.560578	8.97661	8.46832	0.00390898	0.0128117
ENSG00000135709.12|mRNA|KIAA0513|ENSG00000135709.12|ENSG00000135709.12|0|8837	0.560519	7.27777	11.2753	0.000896214	0.00415022
ENSG00000235162.8|mRNA|C12orf75|ENSG00000235162.8|ENSG00000235162.8|0|2693	0.560495	9.27016	13.5256	0.000282945	0.00175096
hsa_circ_0007928|circRNA|hsa_circ_0007928|hsa_circ_0007928|hsa_circ_0007928|0|600	0.560446	3.15596	9.35175	0.00244698	0.00895465
hsa_circ_0006819|circRNA|hsa_circ_0006819|hsa_circ_0006819|hsa_circ_0006819|0|600	0.560275	1.29466	4.29952	0.0390528	0.0769065
ENSG00000174485.15|mRNA|DENND4A|ENSG00000174485.15|ENSG00000174485.15|0|10623	0.560213	8.77339	15.6803	9.55557e-05	0.00078141
hsa_circ_0073592|circRNA|hsa_circ_0073592|hsa_circ_0073592|hsa_circ_0073592|0|600	0.560208	2.04548	6.05377	0.0144908	0.0352506
ENSG00000087053.18|mRNA|MTMR2|ENSG00000087053.18|ENSG00000087053.18|0|6119	0.56018	6.75637	16.1681	7.49008e-05	0.000653684
ENSG00000115896.15|mRNA|PLCL1|ENSG00000115896.15|ENSG00000115896.15|0|8013	0.560165	3.98787	7.95679	0.00513917	0.0157766
ENSG00000112078.13|mRNA|KCTD20|ENSG00000112078.13|ENSG00000112078.13|0|6239	0.560118	8.10994	12.761	0.000417641	0.00235338
hsa_circ_0068180|circRNA|hsa_circ_0068180|hsa_circ_0068180|hsa_circ_0068180|0|600	0.560067	0.954907	4.90042	0.0276698	0.0584303
hsa_circ_0003599|circRNA|hsa_circ_0003599|hsa_circ_0003599|hsa_circ_0003599|0|600	0.560059	1.31617	5.32105	0.0218116	0.0485181
ENSG00000149131.15|mRNA|SERPING1|ENSG00000149131.15|ENSG00000149131.15|0|3603	0.560025	5.60673	9.54228	0.00221326	0.00826655
ENSG00000251399.1|lncRNA|AC092542.1|ENSG00000251399.1|ENSG00000251399.1|0|355	0.560008	4.77822	6.39974	0.0119718	0.0304484
ENSG00000260479.1|lncRNA|AC009145.1|ENSG00000260479.1|ENSG00000260479.1|0|433	0.559928	4.26962	6.71751	0.0100565	0.0265418
hsa_circ_0070830|circRNA|hsa_circ_0070830|hsa_circ_0070830|hsa_circ_0070830|0|600	0.559813	1.14265	5.22295	0.0230509	0.0505609
hsa_circ_0039245|circRNA|hsa_circ_0039245|hsa_circ_0039245|hsa_circ_0039245|0|600	0.559797	0.968775	5.56944	0.0189743	0.0434294
hsa_circ_0001124|circRNA|hsa_circ_0001124|hsa_circ_0001124|hsa_circ_0001124|0|600	0.559724	2.91751	5.91143	0.0156812	0.0374519
hsa_circ_0000137|circRNA|hsa_circ_0000137|hsa_circ_0000137|hsa_circ_0000137|0|600	0.55972	4.04997	9.04336	0.00288006	0.0101203
ENSG00000167995.15|mRNA|BEST1|ENSG00000167995.15|ENSG00000167995.15|0|8930	0.559569	6.67029	10.5047	0.00133704	0.0055801
hsa_circ_0001866|circRNA|hsa_circ_0001866|hsa_circ_0001866|hsa_circ_0001866|0|600	0.559508	4.13739	7.15116	0.00793939	0.0221377
hsa_circ_0037900|circRNA|hsa_circ_0037900|hsa_circ_0037900|hsa_circ_0037900|0|600	0.559383	1.20037	5.55998	0.0190751	0.0436292
hsa_circ_0007476|circRNA|hsa_circ_0007476|hsa_circ_0007476|hsa_circ_0007476|0|600	0.559333	5.84728	8.65961	0.00353043	0.0118264
hsa_circ_0004587|circRNA|hsa_circ_0004587|hsa_circ_0004587|hsa_circ_0004587|0|600	0.559315	2.7137	7.57355	0.00631639	0.018532
hsa_circ_0000629|circRNA|hsa_circ_0000629|hsa_circ_0000629|hsa_circ_0000629|0|600	0.559277	1.55533	6.41318	0.0118835	0.0302798
hsa_circ_0067511|circRNA|hsa_circ_0067511|hsa_circ_0067511|hsa_circ_0067511|0|600	0.559194	1.57081	6.45072	0.0116407	0.0297927
ENSG00000131504.15|mRNA|DIAPH1|ENSG00000131504.15|ENSG00000131504.15|0|7082	0.559146	10.3013	14.6898	0.000157068	0.00113312
ENSG00000187109.13|mRNA|NAP1L1|ENSG00000187109.13|ENSG00000187109.13|0|17355	0.558825	13.0828	13.424	0.000297929	0.00182164
hsa_circ_0087024|circRNA|hsa_circ_0087024|hsa_circ_0087024|hsa_circ_0087024|0|600	0.558806	1.41572	5.88149	0.0159441	0.0379548
hsa_circ_0090739|circRNA|hsa_circ_0090739|hsa_circ_0090739|hsa_circ_0090739|0|600	0.558806	2.9265	9.28098	0.00254009	0.0092247
ENSG00000165914.14|mRNA|TTC7B|ENSG00000165914.14|ENSG00000165914.14|0|21268	0.558726	8.30322	8.04477	0.00490227	0.015237
hsa_circ_0003273|circRNA|hsa_circ_0003273|hsa_circ_0003273|hsa_circ_0003273|0|600	0.558638	1.51949	6.58175	0.0108328	0.0280889
hsa_circ_0037806|circRNA|hsa_circ_0037806|hsa_circ_0037806|hsa_circ_0037806|0|600	0.558534	2.70233	7.26441	0.0074661	0.0211205
ENSG00000251432.6|lncRNA|AC108062.1|ENSG00000251432.6|ENSG00000251432.6|0|3283	0.558414	2.88168	8.92194	0.00307139	0.0106058
hsa_circ_0018047|circRNA|hsa_circ_0018047|hsa_circ_0018047|hsa_circ_0018047|0|600	0.558264	3.01895	8.08003	0.00481049	0.0150196
hsa_circ_0073381|circRNA|hsa_circ_0073381|hsa_circ_0073381|hsa_circ_0073381|0|600	0.558247	1.03244	5.05314	0.0253727	0.0545439
ENSG00000175164.13|mRNA|ABO|ENSG00000175164.13|ENSG00000175164.13|0|6354	0.558168	5.47156	3.66041	0.0567569	0.103503
ENSG00000134851.12|mRNA|TMEM165|ENSG00000134851.12|ENSG00000134851.12|0|7045	0.558157	8.07237	10.9608	0.00105478	0.00470009
ENSG00000023697.12|mRNA|DERA|ENSG00000023697.12|ENSG00000023697.12|0|2844	0.558038	7.09692	10.0856	0.0016642	0.00662677
ENSG00000132356.11|mRNA|PRKAA1|ENSG00000132356.11|ENSG00000132356.11|0|6563	0.557975	7.36098	17.6002	3.67973e-05	0.000381853
ENSG00000119782.13|mRNA|FKBP1B|ENSG00000119782.13|ENSG00000119782.13|0|1677	0.557914	6.09412	8.99412	0.00295614	0.0103107
ENSG00000184983.9|mRNA|NDUFA6|ENSG00000184983.9|ENSG00000184983.9|0|1416	0.5578	8.3428	14.4301	0.000179027	0.00124849
hsa_circ_0072594|circRNA|hsa_circ_0072594|hsa_circ_0072594|hsa_circ_0072594|0|600	0.557777	2.18458	6.45211	0.0116319	0.0297739
hsa_circ_0063397|circRNA|hsa_circ_0063397|hsa_circ_0063397|hsa_circ_0063397|0|600	0.55771	2.91544	5.42242	0.0206038	0.0463757
hsa_circ_0012592|circRNA|hsa_circ_0012592|hsa_circ_0012592|hsa_circ_0012592|0|600	0.557672	0.870973	4.77999	0.0303449	0.0628222
ENSG00000124535.15|mRNA|WRNIP1|ENSG00000124535.15|ENSG00000124535.15|0|3877	0.557653	6.25895	10.3758	0.00143001	0.00588175
hsa_circ_0067835|circRNA|hsa_circ_0067835|hsa_circ_0067835|hsa_circ_0067835|0|600	0.557563	1.42569	6.64361	0.0104717	0.0273911
hsa_circ_0075873|circRNA|hsa_circ_0075873|hsa_circ_0075873|hsa_circ_0075873|0|600	0.557531	0.973725	5.12429	0.0322062	0.0658419
hsa_circ_0034604|circRNA|hsa_circ_0034604|hsa_circ_0034604|hsa_circ_0034604|0|600	0.557524	1.51428	6.11591	0.0140009	0.0343254
ENSG00000134313.15|mRNA|KIDINS220|ENSG00000134313.15|ENSG00000134313.15|0|15362	0.557408	7.22905	14.4457	0.000177625	0.00124301
hsa_circ_0008297|circRNA|hsa_circ_0008297|hsa_circ_0008297|hsa_circ_0008297|0|600	0.557249	3.37879	3.95101	0.0478336	0.0905163
ENSG00000131171.12|mRNA|SH3BGRL|ENSG00000131171.12|ENSG00000131171.12|0|2304	0.557215	10.4766	12.2472	0.00054325	0.002846
hsa_circ_0025684|circRNA|hsa_circ_0025684|hsa_circ_0025684|hsa_circ_0025684|0|600	0.557109	1.80296	4.22341	0.0408132	0.0796202
ENSG00000136021.18|mRNA|SCYL2|ENSG00000136021.18|ENSG00000136021.18|0|7481	0.556983	7.74842	12.4324	0.000494052	0.00265675
ENSG00000168461.12|mRNA|RAB31|ENSG00000168461.12|ENSG00000168461.12|0|5586	0.556951	9.23203	8.97183	0.00299125	0.0104047
hsa_circ_0002032|circRNA|hsa_circ_0002032|hsa_circ_0002032|hsa_circ_0002032|0|600	0.556885	1.0347	5.13493	0.0242253	0.0526146
hsa_circ_0035199|circRNA|hsa_circ_0035199|hsa_circ_0035199|hsa_circ_0035199|0|600	0.556706	1.16524	5.45783	0.0201985	0.0456549
ENSG00000137845.14|mRNA|ADAM10|ENSG00000137845.14|ENSG00000137845.14|0|16168	0.556611	7.99519	14.2362	0.000197432	0.00134948
hsa_circ_0018185|circRNA|hsa_circ_0018185|hsa_circ_0018185|hsa_circ_0018185|0|204	0.55656	1.72639	5.41374	0.0207044	0.0465348
[truncated: 17,946 more rows]

## Sheet: bowtie2 colorectum OvR
genus	logFC	logCPM	F	PValue	FDR
2036021|Agarilytica	4.36619	10.584	146.272	2.27225e-27	1.78826e-24
2093|Mycoplasma	3.82014	10.0641	142.47	8.03101e-27	3.1602e-24
2147|Acholeplasma	3.75017	10.4219	97.0458	7.53212e-20	1.28514e-17
10509|Mastadenovirus	3.67617	7.21876	163.071	8.1648e-20	1.28514e-17
44|Melittangium	3.38078	9.83019	68.3757	5.51801e-15	7.23779e-13
2661818|Saliniradius	3.35222	8.84339	108.816	9.78541e-22	2.56704e-19
2025617|Ketobacter	2.53504	9.75122	49.9598	1.25245e-11	9.85675e-10
2425|Teredinibacter	2.42976	8.40764	51.3168	6.97465e-12	6.09894e-10
810|Chlamydia	2.41175	14.2475	35.7413	6.85077e-09	4.21756e-07
644652|Gordonibacter	2.06459	8.34016	32.0093	3.79105e-08	1.62017e-06
1204360|Siansivirga	2.0277	6.98968	86.6925	8.55571e-08	2.92754e-06
1920864|Rtpvirus	1.86154	7.10267	37.3301	4.25711e-06	0.000101526
1964366|Nissabacter	1.827	10.1989	12.4311	0.00049318	0.0046763
1172191|Catenovulum	1.7937	7.69091	34.3105	1.31619e-08	7.37152e-07
456492|Saccharibacillus	1.75709	8.83194	19.3919	1.5169e-05	0.000277627
44474|Pleurocapsa	1.70616	7.38989	26.7379	4.44414e-07	1.39902e-05
204447|Skermanella	1.70557	12.2941	21.5392	5.33347e-06	0.000123454
1537406|Bacterioplanes	1.69887	9.24402	19.0291	1.81207e-05	0.000316911
48073|Microbulbifer	1.674	10.9699	23.6441	1.93566e-06	4.76052e-05
2282523|Methylorubrum	1.6698	19.4452	10.6826	0.00121652	0.00929513
44471|Microcoleus	1.66028	8.12304	16.4278	6.55456e-05	0.00085974
323620|Shinella	1.63948	9.42976	34.1679	1.40499e-08	7.37152e-07
1433993|Chryseolinea	1.59708	10.3537	20.4439	9.07639e-06	0.000174593
407217|Aquitalea	1.59279	12.3582	11.746	0.000701355	0.00609452
153135|Gammaretrovirus	1.51179	7.4338	10.6511	0.00123664	0.00935806
104204|Streptomonospora	1.504	8.62186	18.7107	2.11863e-05	0.000347367
1543704|Niveispirillum	1.50279	11.9621	26.353	5.33096e-07	1.55388e-05
351195|Salimicrobium	1.49701	10.0081	16.4315	6.54239e-05	0.00085974
743714|Orbus	1.44792	7.81828	10.9591	0.00105364	0.00837591
1163|Anabaena	1.37251	7.31147	20.4396	9.09572e-06	0.000174593
1084558|Oceanicoccus	1.33672	7.673	18.2219	2.69483e-05	0.000432823
1335631|Frischella	1.29898	7.96001	14.2188	0.000198559	0.00223237
744724|Halarchaeum	1.28383	7.36063	13.4434	0.000294174	0.00311001
1755825|Egicoccus	1.26432	7.66662	11.4152	0.000831936	0.00689193
93|Stella	1.24776	6.9875	30.6037	0.00194036	0.0140098
832|Fibrobacter	1.2391	7.61142	11.8966	0.000648986	0.005804
153265|Aequorivita	1.15683	10.0336	9.67361	0.00206232	0.0143632
305899|Endozoicomonas	1.13847	9.41652	13.095	0.000351274	0.00363754
432330|Tumebacillus	1.1261	11.7271	10.8626	0.00110781	0.00871844
649460|Filimonas	1.09129	10.7501	19.1824	1.68082e-05	0.000300637
1348508|Roseimicrobium	1.06017	7.29167	7.0752	0.507726	0.690121
1203|Scytonema	1.05802	10.9759	8.67987	0.00348813	0.0212803
2675230|Cytobacillus	1.05079	14.0727	8.11581	0.0047138	0.0266889
1335745|Spiribacter	1.02717	9.80245	5.46869	0.0200644	0.0770276
114627|Alkaliphilus	0.997243	7.90172	8.37646	0.00410034	0.0242629
202746|Sulfurimonas	0.992144	7.29311	9.04446	0.00287441	0.0185423
2129|Ureaplasma	0.97773	7.43999	7.32939	0.00720093	0.0366447
1720323|Lessievirus	0.977391	7.10106	7.92611	0.90573	0.959367
180541|Salinisphaera	0.962967	7.59607	7.33045	0.00719678	0.0366447
240411|Chitinimonas	0.942017	8.76441	7.88074	0.00534762	0.0292262
187492|Thalassolituus	0.93205	8.10106	8.04041	0.00490823	0.0274454
881616|Herbiconiux	0.925139	11.0529	8.23034	0.00443343	0.025468
1129704|Kyrpidia	0.897642	7.54492	6.51538	0.0338782	0.109816
299566|Adhaeribacter	0.884531	8.94421	5.28333	0.0222678	0.082664
1524214|Vulgatibacter	0.879084	8.66852	5.55027	0.0191678	0.0743106
2717|Cardiobacterium	0.871738	11.0966	7.88606	0.00533236	0.0292262
281472|Jiangella	0.868553	10.8424	9.72661	0.00200565	0.014198
392332|Geoalkalibacter	0.864132	8.38719	5.92055	0.0155918	0.0635788
1484898|Methyloceanibacter	0.817692	11.5216	8.13301	0.00467057	0.0266358
105|Runella	0.812548	7.59419	4.18925	0.0416151	0.124529
278993|Thermincola	0.799833	7.16308	5.56817	0.70031	0.838879
141450|Oleiphilus	0.797536	9.54455	4.48911	0.0349924	0.112636
261825|Agarivorans	0.791282	7.91628	6.52684	0.0111554	0.050456
1299429|Yuavirus	0.781347	7.04732	6.72446	0.135215	0.286831
2256|Natronobacterium	0.774073	7.09879	5.22541	0.635867	0.791139
112040|Zobellia	0.76741	7.44704	5.97376	0.0151378	0.0627025
358023|Lutibacter	0.758867	9.14023	5.95522	0.0152945	0.0629142
1847725|Lawsonella	0.751708	16.4268	6.80617	0.00957269	0.0453838
2571159|Mycetohabitans	0.734583	10.9022	1.94868	0.163836	0.327256
1443919|Tabrizicola	0.72961	7.06748	6.47717	0.10139	0.23819
2489367|Candidatus Cyclonatronum	0.717005	8.94324	4.02527	0.0457857	0.133457
75687|Neptunomonas	0.715242	8.68223	3.90863	0.0490201	0.139691
623276|Maritalea	0.704442	8.0356	5.10509	0.0246251	0.0872971
245876|Nitratireductor	0.700583	11.0066	7.78123	0.00564167	0.0304109
175304|Lentibacillus	0.700022	10.7936	3.9855	0.0468621	0.13609
1434018|Lysinimonas	0.698413	7.44188	4.4827	0.0351218	0.112636
50|Chondromyces	0.697031	11.1701	5.0793	0.0249871	0.0877896
651660|Paenisporosarcina	0.690881	10.6962	2.76323	0.0975733	0.233519
119044|Filomicrobium	0.679068	10.3227	6.37393	0.012134	0.0524695
466152|Singulisphaera	0.677066	7.46173	4.473	0.0353185	0.112636
252356|Maribacter	0.654512	8.20256	4.27003	0.0397104	0.120664
2058174|Antarcticibacterium	0.649339	7.81356	2.02249	0.156099	0.316623
748770|Dolichospermum	0.646842	7.75538	3.34184	0.0686035	0.176441
31988|Aminobacter	0.644756	10.0041	5.21592	0.0231303	0.0846675
316625|Saccharophagus	0.616591	6.94665	14.3948	0.000181667	0.00207205
231683|Saccharospirillum	0.608224	8.44307	2.89117	0.0901773	0.220402
232523|Hylemonella	0.596776	8.95401	3.03727	0.0824711	0.206047
1738655|Woeseia	0.5955	10.678	1.94338	0.164408	0.327482
2005386|Arabia	0.580946	7.28235	3.04604	0.082032	0.205603
1100891|Paenalcaligenes	0.571424	11.7837	2.72567	0.0998687	0.236026
1804663|Haematospirillum	0.55354	9.96869	3.3021	0.0702611	0.179531
2733115|Naesvirus	0.538869	7.14175	2.63134	0.125158	0.271587
349742|Sedimenticola	0.53733	9.60901	1.79555	0.181338	0.348932
234|Brucella	0.534584	11.7373	7.74397	0.00575602	0.0307117
1051|Ectothiorhodospira	0.527496	9.1786	2.87783	0.0909192	0.220844
1751872|Lacimicrobium	0.515503	7.59328	2.88048	0.0907713	0.220844
332951|Halovivax	0.512859	7.21764	2.58051	0.109315	0.251552
1648508|Ciceribacter	0.502427	7.21385	2.91705	0.175448	0.340932
84406|Virgibacillus	0.487477	12.8009	1.80542	0.180147	0.347747
1434046|Sphingorhabdus	0.484364	8.33895	1.9702	0.161535	0.324307
353799|Halostagnicola	0.483754	7.4644	1.50502	0.220931	0.403418
83612|Psychroflexus	0.471184	8.10051	1.84743	0.175177	0.340932
40222|Methylophaga	0.465691	13.2252	0.892497	0.345617	0.547915
574697|Butyricimonas	0.464837	7.06598	2.6059	0.107594	0.249783
258255|Pseudovibrio	0.46361	9.01143	2.89431	0.0900035	0.220402
447467|Simiduia	0.458054	6.99367	4.73059	0.030468	0.102042
390846|Echinicola	0.451183	8.57855	1.38125	0.240887	0.43086
155977|Acaryochloris	0.450032	7.00526	4.07666	0.044433	0.130969
1902583|Candidatus Desulfofervidus	0.441693	7.21185	1.66879	0.937904	0.9672
273135|Candidatus Cardinium	0.440845	7.55153	1.58592	0.691527	0.834711
1077265|Chthonomonas	0.436664	8.52718	1.42989	0.232795	0.418907
34098|Blattabacterium	0.435811	7.54536	1.93994	0.164781	0.327482
79603|Denitrobacterium	0.432745	7.40297	1.71792	0.416252	0.618095
59739|Flammeovirga	0.422227	7.0486	2.02107	0.535403	0.711761
1644057|Salinigranum	0.412516	7.00739	1.26742	0.605293	0.768293
109262|Halothiobacillus	0.407337	8.15045	1.00213	0.31766	0.517595
332102|Fluviicola	0.405685	10.9792	1.13841	0.286909	0.488418
1091|Chlorobium	0.40068	7.08108	1.70279	0.658143	0.809311
1099|Pelodictyon	0.399268	7.40726	1.15009	0.284454	0.487224
1926259|Pseudactinotalea	0.399263	8.15107	1.19024	0.276221	0.478823
1572860|Hartmannibacter	0.395225	9.56146	2.2615	0.133753	0.285268
53392|Thiodictyon	0.39521	9.95811	0.692122	0.406153	0.610005
41201|Ewingella	0.392806	7.78434	1.16645	0.839698	0.93336
72173|Citromicrobium	0.39184	7.07317	2.23188	0.136316	0.287616
1273155|Thiohalobacter	0.39114	8.14483	1.36789	0.24317	0.432974
630749|Spongiibacter	0.387501	7.37268	1.25225	0.264083	0.46288
143222|Salegentibacter	0.387311	10.8784	0.862842	0.353745	0.552376
1769012|Arachidicoccus	0.386366	8.69195	1.63744	0.201737	0.378017
417127|Zunongwangia	0.381201	7.75212	1.05026	0.306332	0.507544
447020|Adlercreutzia	0.380921	7.33982	0.714108	0.398805	0.601264
2024975|Silvanigrella	0.376589	8.42373	1.06742	0.302422	0.503184
65047|Mitsuaria	0.360264	9.86151	1.75534	0.186288	0.354127
1744881|Sulfuricaulis	0.357112	9.10896	1.09851	0.295499	0.495858
1209327|Flavivirga	0.351517	7.50167	1.15035	0.2844	0.487224
253238|Ethanoligenens	0.349878	10.7832	1.01382	0.314859	0.517394
1395974|Tardiphaga	0.340713	10.2803	1.4585	0.228189	0.413101
46239|Mesoplasma	0.340312	7.31456	1.23056	0.26825	0.468099
908623|Euzebya	0.338183	7.19512	0.862975	0.444762	0.637573
1692042|Sulfurifustis	0.33525	8.70268	0.903338	0.342708	0.544872
2737|Vagococcus	0.331659	10.8183	1.03104	0.310793	0.513852
18|Pelobacter	0.328832	8.8519	0.686149	0.408183	0.611886
293088|Martelella	0.32663	8.4237	1.18664	0.276946	0.479025
34093|Simkania	0.318361	7.49384	0.840299	0.360101	0.560077
1231242|Ferrovibrio	0.316628	8.13442	0.696187	0.40478	0.609105
1485594|Methyloligella	0.316275	8.25937	0.889406	0.346452	0.547915
68288|Cyclobacterium	0.313549	9.36048	0.51757	0.472481	0.654652
1287916|Euzebyella	0.309157	7.06859	0.916858	0.909473	0.960823
47251|Leptolyngbya	0.308931	10.6131	0.630707	0.427769	0.626688
670486|Dehalogenimonas	0.305102	7.02479	0.800845	0.996054	0.998592
171|Leptospira	0.303697	8.20103	0.75171	0.386678	0.590904
745410|Gallaecimonas	0.295487	7.96599	1.00474	0.317033	0.517595
106591|Ensifer	0.286712	11.0133	1.36006	0.24452	0.434395
2077|Sporolactobacillus	0.286387	7.86353	0.5626	0.453845	0.642402
293431|Haloquadratum	0.284695	6.93637	1.36631	0.835516	0.93336
1217416|Halioglobus	0.281744	8.58844	0.595167	0.441079	0.635254
655352|Cohaesibacter	0.269247	8.10476	0.745974	0.470312	0.654436
34067|Cycloclasticus	0.261214	7.25298	0.762722	0.383227	0.586769
261827|Algibacter	0.257378	8.6166	0.654097	0.419339	0.621506
219181|Ottowia	0.254434	12.3166	2.15222	0.143487	0.299534
1433402|Glycocaulis	0.253754	7.47817	0.468662	0.551391	0.726875
2680004|Protaetiibacter	0.248192	11.5474	0.836393	0.361218	0.560707
1434050|Zhongshania	0.228422	7.57284	0.481766	0.488199	0.669361
40136|Oligotropha	0.227222	8.86936	0.62679	0.429206	0.626688
2173039|Arcticibacterium	0.221693	7.79983	0.393324	0.531068	0.710801
2375|Sporomusa	0.221452	11.4129	0.266966	0.605783	0.768293
1906657|Candidatus Doolittlea	0.219289	7.25543	0.436738	0.855916	0.935476
1911549|Raineyella	0.217956	8.28114	0.245942	0.620336	0.779724
1509243|Candidatus Nucleicultrix	0.217634	9.88135	0.327196	0.567774	0.740535
1101|Prosthecochloris	0.207479	7.04659	0.4321	0.990293	0.994082
1676125|Thermogutta	0.207101	9.60007	0.363292	0.547172	0.723738
2321113|Pseudoarcobacter	0.205905	7.48059	0.295199	0.912195	0.960823
79328|Chitinophaga	0.197648	10.9702	0.641237	0.423943	0.624235
1525371|Neorhizobium	0.195881	10.8701	0.748266	0.387767	0.591266
1541445|Candidatus Phaeomarinobacter	0.190515	8.61881	0.337957	0.561479	0.735248
469322|Steroidobacter	0.188101	13.6164	0.533411	0.465787	0.653277
1649279|Epibacterium	0.179041	9.89036	0.383196	0.536401	0.711885
436357|Thalassococcus	0.178732	7.84063	0.333207	0.564241	0.737637
290174|Aquimarina	0.177747	8.57142	0.275227	0.600262	0.766274
1518147|Wenyingzhuangia	0.173382	7.49085	0.269513	0.894119	0.952194
335405|Sphingosinicella	0.168346	10.4685	0.388679	0.533502	0.711665
1623297|Stanholtvirus	0.167878	6.97577	0.468661	0.810522	0.919136
85076|Marichromatium	0.166607	9.04509	0.165558	0.684401	0.829928
1156568|Methylovirgula	0.165087	7.06751	0.306165	0.845068	0.93336
44260|Moorella	0.164661	7.82777	0.194126	0.659845	0.810137
2316020|Mediterraneibacter	0.16333	10.6797	0.230798	0.631308	0.789522
58050|Moritella	0.160772	8.5061	0.260424	0.610231	0.772109
142577|Prauserella	0.160484	10.7397	0.208351	0.648417	0.801106
363408|Nonlabens	0.158596	8.24639	0.245882	0.620379	0.779724
1921784|Kiritimatiella	0.158537	7.0856	0.23111	0.941825	0.9672
890|Desulfuromonas	0.156254	8.78614	0.165903	0.68409	0.829928
34019|Liberibacter	0.155057	10.1784	0.422287	0.516331	0.6968
773|Bartonella	0.154151	10.7504	0.529708	0.467338	0.653277
189384|Candidatus Tremblaya	0.153147	13.7992	0.101291	0.750523	0.877655
1004301|Flavihumibacter	0.153054	10.9929	0.308299	0.57917	0.750917
61434|Dehalococcoides	0.151476	9.72492	0.152524	0.696432	0.836782
289244|Xylanimicrobium	0.146161	7.12708	0.229838	0.632019	0.789522
292691|Gramella	0.144118	10.0483	0.106889	0.743958	0.876544
204476|Labrys	0.142938	8.27885	0.187181	0.665607	0.81467
208215|Parvularcula	0.141103	7.89662	0.174474	0.676486	0.82394
235888|Salinibacterium	0.135734	8.62956	0.19631	0.658058	0.809311
140052|Betaretrovirus	0.135525	11.5132	0.0911304	0.762969	0.883025
191769|Marinilactibacillus	0.135501	10.1221	0.106193	0.744764	0.876544
318147|Paucibacter	0.131713	9.40727	0.224065	0.636329	0.791139
1654741|Bombella	0.130209	7.75485	0.150441	0.698409	0.837878
112987|Neochlamydia	0.124149	8.98883	0.115532	0.734187	0.86888
2740557|Pauljensenia	0.116728	9.32165	0.0689254	0.793101	0.903286
1623278|Bronvirus	0.116348	7.67545	0.0871501	0.768051	0.886245
40751|Thioploca	0.115778	8.65703	0.0976468	0.754905	0.878861
752201|Sphaerospermopsis	0.111531	6.98663	0.777776	0.378579	0.584199
1569|Sporosarcina	0.10577	14.256	0.0694242	0.792371	0.903286
377315|Mariprofundus	0.105523	7.93766	0.0863173	0.76913	0.886245
57495|Dermacoccus	0.102045	11.9994	0.0985397	0.753823	0.878861
1934947|Immundisolibacter	0.100275	9.42731	0.0722722	0.788255	0.900372
2045213|Candidatus Fonsibacter	0.0914702	7.14689	0.0264344	0.870961	0.941547
529881|Candidatus Aquiluna	0.0904949	7.16863	0.102318	0.749304	0.877534
1621534|Paraglaciecola	0.0857177	7.11374	0.141592	0.706989	0.84431
1755829|Ichthyobacterium	0.0856825	7.10916	0.00277537	0.958023	0.976637
885864|Jeongeupia	0.0843876	7.04357	0.0344484	0.852891	0.933554
651456|Kosmotoga	0.0798566	7.0148	0.00645387	0.936027	0.9672
388463|Edaphobacter	0.0797249	7.34594	0.0526875	0.818619	0.924323
387342|Halopiger	0.077637	7.99214	0.0382983	0.844988	0.93336
33001|Desulfurella	0.0723696	7.8665	0.0356668	0.850342	0.93336
518753|Luteolibacter	0.0696339	7.76644	0.0345271	0.852725	0.933554
1075397|Halolamina	0.0677253	7.67014	0.0213411	0.883959	0.950376
59282|Blastochloris	0.0633757	12.1395	0.0760773	0.782889	0.896847
1649470|Minicystis	0.0628354	11.3341	0.0447138	0.832685	0.93336
830|Butyrivibrio	0.0615736	7.80659	0.0279483	0.867351	0.938935
1778653|Sulfuriferula	0.0610629	7.05671	0.0619258	0.80366	0.913989
1912217|Pseudopropionibacterium	0.058947	7.74825	0.0285134	0.866029	0.938795
252306|Robiginitalea	0.0586213	7.13789	0.0201197	0.887305	0.952194
106146|Pelistega	0.0573782	14.0035	0.00943557	0.922687	0.96307
1524217|Labilithrix	0.0568457	12.7843	0.0302926	0.861954	0.938254
444051|Mesoflavibacter	0.0562376	6.94131	0.0913881	0.913209	0.960823
1302410|Candidatus Annandia	0.0547272	7.07727	0.0016285	0.967839	0.98092
127|Isosphaera	0.0481639	8.20184	0.0240233	0.876937	0.946708
1855416|Qipengyuania	0.0468626	7.15515	0.105888	0.745118	0.876544
75309|Rhodanobacter	0.0424202	9.29154	0.0197544	0.888326	0.952194
43773|Syntrophus	0.0423525	7.44448	0.0126431	0.910554	0.960823
1443590|Ferriphaselus	0.041374	9.59845	0.0183067	0.89247	0.952194
288793|Salinimonas	0.0403209	7.47418	0.0305867	0.861292	0.938254
453161|Candidatus Nitrotoga	0.036204	10.2185	0.0105961	0.918086	0.962096
230666|Chitinibacter	0.0355885	7.13838	0.00650946	0.935753	0.9672
249529|Caldanaerobacter	0.0354611	7.01686	0.0441347	0.833756	0.93336
327159|Candidatus Accumulibacter	0.0352966	9.39425	0.0121127	0.912443	0.960823
76632|Thermobacillus	0.0323013	7.23535	0.0101932	0.919654	0.962457
69474|Orientia	0.0299798	7.95878	0.0106123	0.918024	0.962096
261963|Kangiella	0.0292302	10.202	0.00593588	0.938643	0.9672
146918|Salinibacter	0.0281495	7.03752	0.036112	0.849422	0.93336
47|Archangium	0.0261127	11.2375	0.00503043	0.943508	0.9672
1607807|Candidatus Methanoplasma	0.0256514	7.5141	0.00284957	0.957466	0.976637
2060722|Labilibaculum	0.0207743	8.22469	0.00475414	0.945078	0.9672
1582879|Ezakiella	0.0171563	8.8106	0.00147458	0.969396	0.98092
1184396|Mesotoga	0.0167793	7.13277	0.0147427	0.903446	0.958237
46238|Entomoplasma	0.0161518	7.03952	0.00969508	0.921635	0.96307
28884|Hydrogenovibrio	0.0151286	7.32364	0.00490013	0.944243	0.9672
1849822|Paraclostridium	0.0147591	8.14532	0.00186666	0.965569	0.98092
295595|Candidatus Hepatoplasma	0.0141577	7.25324	0.00321508	0.954823	0.975904
283735|Leeuwenhoekiella	0.0112084	7.67588	0.00155662	0.970948	0.98092
682522|Ilumatobacter	0.00665416	7.18066	0.00169005	0.967237	0.98092
2023|Thermoactinomyces	0.00171676	8.56244	8.53251e-06	0.997671	0.998941
2005380|Mariniblastus	0.00049029	8.53	2.40616e-07	0.999609	0.999609
986106|Acidiferrobacter	-0.00499189	9.51027	0.000152653	0.990151	0.994082
47670|Lautropia	-0.00505133	8.39246	0.000446253	0.983161	0.991984
45669|Salinicoccus	-0.00579965	14.6861	0.000198543	0.988768	0.994082
1301080|Candidatus Nasuia	-0.00726888	10.1911	0.00024699	0.987472	0.994082
1734920|Pseudorhodoplanes	-0.0106133	10.6122	0.0018835	0.965414	0.98092
235572|Candidatus Portiera	-0.0115249	9.23819	0.00134886	0.970729	0.98092
2707020|Aerosticca	-0.0227985	8.73568	0.00522769	0.942413	0.9672
379899|Niabella	-0.0254748	9.92138	0.00843074	0.926908	0.963641
413435|Solimonas	-0.0296724	10.5397	0.00865868	0.925929	0.963641
893|Desulfobulbus	-0.0322039	7.6926	0.00779876	0.929693	0.965262
1218|Prochlorococcus	-0.0327242	7.21696	0.0111071	0.916142	0.962096
428711|Jonquetella	-0.0395131	7.25862	0.0217907	0.882752	0.950376
556257|Pseudolabrys	-0.0400754	10.7128	0.0226292	0.880534	0.949288
946234|Flavonifractor	-0.0406772	9.87021	0.00909331	0.924098	0.963265
49277|Psychroserpens	-0.0442129	8.56172	0.0160441	0.899296	0.956414
2078948|Epidermidibacterium	-0.0482562	7.57654	0.0178288	0.893875	0.952194
626119|Ruania	-0.0527043	7.07192	0.00495062	0.943957	0.9672
169055|Nordella	-0.0542721	7.29898	0.0393009	0.842998	0.93336
168934|Thalassospira	-0.055618	10.093	0.0552465	0.814345	0.921372
55079|Aneurinibacillus	-0.0570953	11.7466	0.015114	0.902244	0.958237
1237|Piscirickettsia	-0.0606784	10.0293	0.0325187	0.857025	0.935476
238749|Diaphorobacter	-0.0614778	11.81	0.0917591	0.762178	0.883025
140458|Thermacetogenium	-0.0638537	6.98094	0.219948	0.639445	0.792509
244698|Gillisia	-0.0638914	10.2801	0.0183386	0.892377	0.952194
83770|Succinivibrio	-0.0643562	6.94967	0.0180098	0.89334	0.952194
754249|Luteimicrobium	-0.0655355	7.36335	0.0372634	0.84707	0.93336
365348|Pelosinus	-0.065848	9.36313	0.0361674	0.849308	0.93336
123|Pirellula	-0.0661501	9.70891	0.0367375	0.848139	0.93336
1193515|Snodgrassella	-0.0684655	11.9551	0.0297006	0.863296	0.938417
427753|Humibacter	-0.0695424	7.33326	0.0405892	0.840479	0.93336
776|Coxiella	-0.0705982	9.68657	0.048502	0.825851	0.929821
2028344|Ereboglobus	-0.0709314	7.90626	0.0418842	0.837989	0.93336
393005|Tamlana	-0.0714766	8.12846	0.0393084	0.842983	0.93336
1921582|Orrella	-0.0719556	10.1247	0.0454604	0.831315	0.93336
1221880|Psychrobacillus	-0.074439	10.6133	0.0374456	0.846701	0.93336
1408194|Endomicrobium	-0.0762057	7.1975	0.0733846	0.786671	0.899869
89966|Hymenobacter	-0.0774038	13.3357	0.0493675	0.82433	0.929438
33951|Acetobacterium	-0.0783804	9.34536	0.0286892	0.865621	0.938795
2690159|Anaerohalosphaera	-0.0794829	7.27144	0.0555805	0.941661	0.9672
1911577|Oryzomicrobium	-0.0843841	8.45112	0.0549504	0.814834	0.921372
40544|Sutterella	-0.0895601	12.4961	0.0384351	0.844714	0.93336
2330|Halanaerobium	-0.0928694	7.31388	0.102499	0.74909	0.877534
82982|Obesumbacterium	-0.0936934	7.89752	0.087316	0.767837	0.886245
1649510|Variibacter	-0.0961638	10.2478	0.135622	0.712951	0.847572
1434019|Mameliella	-0.0963546	7.82406	0.0780855	0.780115	0.896847
1649468|Melaminivora	-0.0989982	10.6316	0.158161	0.691159	0.834711
376488|Halotalea	-0.10441	9.03657	0.0761607	0.782773	0.896847
1602345|Parasaccharibacter	-0.107391	7.90169	0.0925279	0.761214	0.883025
336276|Olleya	-0.108026	7.88683	0.0989856	0.753285	0.878861
573657|Candidatus Hodgkinia	-0.108062	9.02457	0.107332	0.743448	0.876544
366614|Haematobacter	-0.109231	12.4986	0.103291	0.748155	0.877534
83614|Luteimonas	-0.110603	12.0406	0.142856	0.705744	0.844105
60136|Sulfitobacter	-0.120533	9.09171	0.153205	0.695789	0.836782
67575|Rheinheimera	-0.121289	10.8143	0.152994	0.695989	0.836782
376170|Haloplanus	-0.12827	7.22124	0.2762	0.599619	0.766274
262|Francisella	-0.138626	10.9524	0.173874	0.677011	0.82394
444459|Flagellimonas	-0.142477	7.15123	0.218396	0.640628	0.792727
99|Ancylobacter	-0.142481	9.85775	0.326241	0.568339	0.740535
504090|Kushneria	-0.143145	10.3769	0.182335	0.669703	0.81841
121871|Haloterrigena	-0.145221	9.27152	0.133202	0.715411	0.849213
57479|Microvirgula	-0.156242	10.1677	0.219958	0.639437	0.792509
71666|Waddlia	-0.157098	7.25076	0.244723	0.621203	0.779724
1882917|Pajaroellobacter	-0.16103	8.95093	0.250006	0.617464	0.778756
1522431|Thermosulfurimonas	-0.166596	6.9985	0.419031	0.517952	0.6968
29526|Syntrophobacter	-0.16961	7.04219	0.588295	0.443726	0.637249
299261|Tateyamaria	-0.170053	7.52737	0.173466	0.677369	0.82394
1937972|Bernardetia	-0.172203	6.98633	0.135983	0.712586	0.847572
359407|Methylotenera	-0.172699	7.1633	0.27305	0.601706	0.766274
286104|Winogradskyella	-0.174168	7.91202	0.225134	0.635526	0.791139
2035712|Guyparkeria	-0.176633	6.99446	0.7719	0.380384	0.585465
2603324|Acidibrevibacterium	-0.176642	9.89036	0.303592	0.582079	0.75221
48075|Marinobacterium	-0.181571	9.56891	0.28073	0.596643	0.766001
91914|Asaia	-0.184116	8.90465	0.359932	0.549029	0.724977
54066|Xylophilus	-0.184237	12.1147	0.41961	0.517663	0.6968
1078904|Candidatus Nitrosotalea	-0.185157	6.97428	1.40576	0.236768	0.424456
511434|Candidatus Azobacteroides	-0.195912	7.19043	0.340027	0.560283	0.734905
1623298|Phietavirus	-0.198533	7.68287	0.205937	0.650323	0.802201
1623304|Moineauvirus	-0.200132	6.93769	2.14411	0.348936	0.547915
379070|Gilvibacter	-0.201489	6.95729	0.129584	0.719136	0.852349
111500|Muricauda	-0.205982	8.11331	0.388493	0.5336	0.711665
1291539|Candidatus Methanomethylophilus	-0.211946	6.96583	0.98383	0.322112	0.521609
11019|Alphavirus	-0.212285	7.16796	0.0774156	0.781036	0.896847
34008|Rhodovulum	-0.215826	10.7471	0.471534	0.492851	0.672611
29331|Amphibacillus	-0.217256	8.61644	0.280794	0.596602	0.766001
64895|Borreliella	-0.218615	7.03461	0.526383	0.468738	0.654072
1579315|Halocynthiibacter	-0.219781	8.68963	0.582918	0.445814	0.63792
41707|Lawsonia	-0.220063	7.15294	0.433645	0.510747	0.693032
88723|Natrinema	-0.221491	7.86699	0.316693	0.574052	0.74551
2202|Methanospirillum	-0.221979	7.18838	0.160232	0.689248	0.83452
33055|Candidatus Kinetoplastibacterium	-0.2221	8.92214	0.26629	0.606239	0.768293
28250|Ornithobacterium	-0.225474	7.28654	0.469055	0.493989	0.672611
125287|Ornithinimicrobium	-0.227025	11.7495	0.425412	0.514784	0.69659
425|Methylosinus	-0.2307	8.41247	0.511301	0.475172	0.657224
329857|Cohnella	-0.23084	10.1593	0.317427	0.573609	0.74551
599651|Bermanella	-0.231484	9.91108	0.303949	0.581857	0.75221
359336|Castellaniella	-0.23161	8.9025	0.2922	0.589244	0.760221
2094023|Glaesserella	-0.241412	9.33345	0.539725	0.463162	0.653277
1802983|Candidatus Fokinia	-0.241673	7.47334	0.469723	0.493682	0.672611
2239|Halobacterium	-0.242548	8.07308	0.375174	0.540695	0.716375
242605|Luteibacter	-0.244555	10.2174	0.538411	0.463706	0.653277
2370|Xylella	-0.247615	10.1161	0.911118	0.340642	0.542682
230494|Reinekea	-0.25603	8.19025	0.532252	0.466272	0.653277
2132|Spiroplasma	-0.257018	8.08305	0.676295	0.411566	0.614615
1085622|Propioniciclava	-0.258163	7.2665	0.569717	0.451006	0.639535
2700084|Urechidicola	-0.258665	8.09373	0.484832	0.48682	0.668634
1980513|Candidatus Nitrosoglobus	-0.262054	7.79279	0.621367	0.431207	0.628444
1654931|Crenobacter	-0.263014	11.0283	0.424691	0.51514	0.69659
1134403|Melioribacter	-0.263171	7.33253	0.530933	0.47829	0.659699
2172|Methanobrevibacter	-0.264974	10.8347	0.287367	0.592338	0.762963
2126281|Mycolicibacillus	-0.265478	7.58228	0.672669	0.412821	0.615322
1542963|Halapricum	-0.26897	7.04241	0.872834	0.350977	0.549143
152267|Pigmentiphaga	-0.269158	9.25905	0.519288	0.471747	0.654652
74385|Gracilibacillus	-0.272868	8.91596	0.535887	0.464755	0.653277
1980514|Halodesulfurarchaeum	-0.273391	7.029	1.33253	0.24934	0.441961
1705353|Aurantimicrobium	-0.274952	10.2169	0.496881	0.48146	0.662429
158481|Hahella	-0.278291	7.05912	0.503315	0.478638	0.659699
869|Dichelobacter	-0.279975	9.00114	0.677774	0.411055	0.614615
326319|Dokdonia	-0.280326	7.00342	0.640423	0.601725	0.766274
414371|Aureimonas	-0.280811	11.6092	0.849947	0.357362	0.556918
2478349|Indioceanicola	-0.281559	7.51625	0.417225	0.518854	0.696823
577309|Paraprevotella	-0.28286	7.71034	0.531613	0.466539	0.653277
2321115|Halarcobacter	-0.28378	7.94913	0.598669	0.439739	0.635254
1331737|Haloactinobacterium	-0.286496	10.2071	0.878227	0.349496	0.547915
32014|Iodobacter	-0.287616	7.66492	0.610519	0.435253	0.632
1769729|Hathewaya	-0.289204	7.3896	0.62812	0.428717	0.626688
2698688|Paraflavitalea	-0.292922	11.0297	0.996722	0.318968	0.518652
134813|Natronorubrum	-0.297197	8.08611	0.596505	0.440566	0.635254
236752|Fastidiosipila	-0.298992	11.9606	0.251	0.616765	0.778756
697025|Hoyosella	-0.299401	7.68965	0.717646	0.397641	0.600659
264688|Trichormus	-0.301141	7.15537	0.770267	0.380887	0.585465
198251|Candidatus Pelagibacter	-0.304804	8.05936	1.0083	0.316178	0.517394
39773|Methylomicrobium	-0.317064	8.53892	0.978975	0.323307	0.522469
265570|Sulfurovum	-0.318626	7.74901	0.572976	0.449716	0.639535
231454|Dyella	-0.318761	10.831	0.741695	0.389856	0.59231
82976|Buttiauxella	-0.319835	8.05216	0.719	0.397197	0.600659
2676060|Allopseudarcicella	-0.320202	12.2909	0.386925	0.534427	0.711665
741759|Tomitella	-0.323786	7.27817	0.746213	0.388418	0.591266
542837|Zindervirus	-0.324238	7.27954	0.576923	0.44816	0.639535
2690160|Limihaloglobus	-0.32836	8.08208	0.667902	0.414479	0.616626
1107|Chloroflexus	-0.330249	7.85915	0.593993	0.441529	0.635254
1434032|Pontimonas	-0.330898	8.56603	1.42777	0.23314	0.418907
1160973|Auritidibacter	-0.331632	7.38664	0.959686	0.810326	0.919136
93682|Roseivivax	-0.331927	11.0549	1.14853	0.284782	0.487224
953|Wolbachia	-0.332706	8.175	1.10339	0.29443	0.495858
1849828|Paeniclostridium	-0.33821	12.2878	0.476265	0.490691	0.671607
2483368|Sedimentisphaera	-0.340327	8.28622	0.793596	0.37378	0.577927
336809|Candidatus Sulcia	-0.341654	8.07079	1.19668	0.274926	0.477631
43356|Kutzneria	-0.342945	7.34447	0.930013	0.335692	0.536971
263377|Salipiger	-0.344934	8.90551	0.969989	0.325534	0.523916
28895|Thermoanaerobacterium	-0.34558	12.4312	0.640977	0.424036	0.624235
1676651|Limnochorda	-0.349626	7.41518	0.952228	0.329996	0.528934
1754|Thermoanaerobacter	-0.353326	7.80278	0.917862	0.338864	0.540945
29287|Natronococcus	-0.353645	9.27243	0.631582	0.427449	0.626688
1055692|Chitinolyticbacter	-0.354124	7.12827	1.09891	0.295411	0.495858
1608298|Thiolapillus	-0.354933	7.47327	1.07849	0.299932	0.501161
28050|Lachnospira	-0.355564	7.95657	0.881282	0.34866	0.547915
28236|Petrotoga	-0.35671	7.01475	1.51467	0.450792	0.639535
1912215|Acidipropionibacterium	-0.356821	11.1133	1.90127	0.169037	0.334252
196081|Scardovia	-0.361067	7.18421	1.26424	0.261814	0.459928
29393|Dolosigranulum	-0.361434	13.3363	1.13779	0.287039	0.488418
64159|Desulfurobacterium	-0.365023	6.97879	2.84174	0.122272	0.269032
162171|Magnetococcus	-0.369188	7.47337	1.16436	0.281493	0.485822
291183|Lacinutrix	-0.370254	7.96953	1.25403	0.396714	0.600659
191303|Turicibacter	-0.371055	12.601	0.607279	0.436473	0.632604
54304|Planktothrix	-0.374368	8.18877	0.885299	0.347566	0.547915
1649453|Gimesia	-0.376885	8.19431	1.24603	0.26527	0.463928
82980|Leminorella	-0.379114	7.60389	1.09294	0.369776	0.572862
390805|Geosporobacter	-0.379723	8.25355	1.28167	0.258557	0.456243
1915401|Roseitalea	-0.381638	6.9613	2.75085	0.434322	0.631814
233191|Caldilinea	-0.383839	6.9419	3.12987	0.470661	0.654436
1649480|Planctopirus	-0.395354	10.1547	1.07294	0.301176	0.502173
2029|Kibdelosporangium	-0.398183	9.99789	1.15112	0.284239	0.487224
1869285|Allofrancisella	-0.398617	7.1935	1.44337	0.598167	0.766274
267408|Arsenicicoccus	-0.404268	10.0967	0.972714	0.324856	0.523897
289201|Pontibacillus	-0.407602	7.20638	1.45759	0.228334	0.413101
864|Pectinatus	-0.410389	7.56292	1.13636	0.287341	0.488418
311181|Denitratisoma	-0.411916	7.61792	1.50984	0.220195	0.403009
153497|Kozakia	-0.413776	9.89031	1.865	0.173145	0.338127
1970191|Salinivirga	-0.417418	7.41345	1.48371	0.627296	0.786118
543311|Parvimonas	-0.418562	9.49146	1.00812	0.316222	0.517394
86331|Mogibacterium	-0.42022	10.6357	0.95989	0.328061	0.526906
1862|Dermatophilus	-0.421024	10.0937	1.47249	0.225977	0.410725
1579506|Roseimaritima	-0.421785	8.69692	1.11159	0.292646	0.494232
1073986|Halobellus	-0.423656	7.0418	2.39859	0.122575	0.269032
1706036|Gemmatirosa	-0.426811	12.2925	1.61692	0.204578	0.382128
1905344|Ruthenibacterium	-0.428656	7.7783	1.05226	0.305873	0.507544
497726|Nitrososphaera	-0.429655	8.35381	1.11845	0.291165	0.492788
1069494|Trueperella	-0.42982	10.6513	1.2899	0.257038	0.454582
2093783|Methylomusa	-0.431925	9.76552	1.08133	0.299298	0.501161
665568|Paraoerskovia	-0.432284	11.4671	1.97906	0.160599	0.324081
187|Aquaspirillum	-0.432323	10.0854	0.766623	0.382015	0.586054
1897649|Pistricoccus	-0.432587	9.09016	0.887633	0.346932	0.547915
29574|Taylorella	-0.433898	12.3446	1.27454	0.259883	0.457557
256319|Chlorobaculum	-0.436908	7.03606	2.39669	0.122723	0.269032
459532|Terribacillus	-0.437968	9.57616	1.20537	0.273194	0.475672
933|Thiomicrospira	-0.438585	7.38136	1.59413	0.207789	0.386595
138|Borrelia	-0.439462	7.06893	1.72924	0.424088	0.624235
29407|Rhodoplanes	-0.441426	8.26508	1.6146	0.204902	0.382128
65496|Actinoalloteichus	-0.442697	11.8172	1.37228	0.242416	0.432611
1195526|Gryllotalpicola	-0.442718	9.76478	2.15825	0.142929	0.299163
157920|Cellulosimicrobium	-0.444206	12.1245	2.52626	0.113095	0.256269
2608728|Acidisarcina	-0.445767	9.1206	0.99161	0.32021	0.519598
225842|Formosa	-0.44598	8.17425	1.70181	0.193123	0.364479
1518149|Thalassotalea	-0.447917	8.0972	2.08114	0.150247	0.309541
55968|Leucobacter	-0.451963	11.1379	2.35566	0.125959	0.271587
141948|Thermomonas	-0.452552	10.8092	2.09099	0.149289	0.308374
323413|Dokdonella	-0.45583	9.59152	1.97065	0.161487	0.324307
335927|Thalassobius	-0.460823	8.77126	1.80431	0.18028	0.347747
655184|Candidatus Thioglobus	-0.461417	7.3371	1.74797	0.520473	0.697806
2039240|Anaerotignum	-0.463663	7.03843	2.595	0.108329	0.25075
455076|Rhodocytophaga	-0.463687	8.00098	1.02278	0.312733	0.515977
768|Anaplasma	-0.464015	7.56148	1.78351	0.182804	0.350895
447237|Frondihabitans	-0.465526	7.59437	1.74558	0.187513	0.355598
68|Lysobacter	-0.471467	13.646	3.23555	0.0731336	0.186266
1007|Saprospira	-0.472377	6.9768	4.09908	0.185294	0.353143
367298|Phycicoccus	-0.474983	11.2417	2.05575	0.152749	0.310629
117156|Actinopolymorpha	-0.475121	10.0563	2.47578	0.116742	0.261011
1961799|Lacunisphaera	-0.475126	9.49803	1.49182	0.222963	0.406184
152161|Stappia	-0.475736	9.04573	2.51274	0.114059	0.257204
568|Hafnia	-0.483294	9.21887	1.9802	0.160479	0.324081
162289|Peptoniphilus	-0.4838	13.7982	2.3854	0.123603	0.270211
1295327|Croceicoccus	-0.485029	12.2991	4.45053	0.0357785	0.113083
1714270|Gammasphaerolipovirus	-0.487101	6.96673	4.48089	0.215486	0.39716
334107|Conchiformibius	-0.488159	8.17386	1.56621	0.211804	0.39177
416|Methylomonas	-0.488817	9.26968	2.11	0.14746	0.305398
56358|Sandaracinobacter	-0.490409	7.48355	1.56442	0.212063	0.39177
907364|Phytohabitans	-0.500643	7.22322	1.88593	0.170761	0.335444
257820|Kerstersia	-0.502509	10.6438	2.35748	0.125813	0.271587
843|Wolinella	-0.503515	7.29205	1.88699	0.170642	0.335444
116071|Micropruina	-0.510102	12.2957	2.172	0.141668	0.297313
947525|Miniimonas	-0.510374	7.20637	1.79045	0.315503	0.517394
45667|Halobacillus	-0.510622	11.8857	1.51344	0.219648	0.402944
1594166|Oricola	-0.513153	7.08057	2.58722	0.152175	0.310263
434|Acetobacter	-0.513319	12.4398	2.56559	0.11034	0.252435
190323|Plantibacter	-0.515719	10.8535	3.67792	0.0561555	0.152368
221065|Kordia	-0.515907	7.58548	1.96446	0.162146	0.324704
1505664|Gottschalkia	-0.517612	6.95703	4.05364	0.448657	0.639535
196082|Parascardovia	-0.517781	7.00428	3.15258	0.424353	0.624235
96|Gallionella	-0.51823	9.55565	1.76309	0.185322	0.353143
1331730|Chryseoglobus	-0.519037	7.26267	2.76492	0.0974712	0.233519
265488|Rhodopirellula	-0.520387	8.81836	1.44648	0.230111	0.41536
89404|Glaciecola	-0.520736	7.10675	2.29752	0.757961	0.881115
1780190|Izhakiella	-0.523717	7.6407	1.7204	0.190717	0.360803
159191|Nodularia	-0.525346	8.2662	1.58398	0.209238	0.388373
203804|Candidatus Blochmannia	-0.531419	7.18936	2.69217	0.101966	0.23883
648802|Rummeliibacillus	-0.535797	9.75097	2.07181	0.151162	0.309793
896|Desulfococcus	-0.538643	7.80368	2.06785	0.151551	0.309793
1677050|Novibacillus	-0.544273	8.27064	2.21027	0.138221	0.290855
86795|Marmoricola	-0.544595	13.7426	3.90925	0.0490024	0.139691
2042066|Paraphotobacterium	-0.544622	7.95805	2.11158	0.147308	0.305398
238783|Pseudorhodobacter	-0.544996	11.9043	3.52942	0.0613283	0.161964
375928|Natranaerobius	-0.546422	7.2258	2.48678	0.115936	0.259949
1471399|Draconibacterium	-0.547544	8.10919	1.88454	0.170919	0.335444
649461|Lacibacter	-0.549098	7.71188	1.87108	0.172449	0.337606
1137960|Allokutzneria	-0.549796	11.086	2.67909	0.102798	0.240066
228398|Streptacidiphilus	-0.553933	9.60709	3.81524	0.0517848	0.14452
204286|Cobetia	-0.555604	9.66153	1.76594	0.184968	0.353143
1827478|Youhaiella	-0.55603	7.00848	3.85959	0.0610254	0.161707
1763521|Paludisphaera	-0.558792	11.7532	2.5865	0.108906	0.251346
204619|Candidatus Nardonella	-0.559519	7.26706	2.9902	0.0848727	0.210047
1649454|Glaciihabitans	-0.56012	7.38599	2.7143	0.100575	0.236983
1649486|Rhizorhabdus	-0.56236	10.7742	5.53479	0.0193347	0.0745902
320496|Neoasaia	-0.563201	9.03465	2.49854	0.115082	0.25877
204456|Gemmobacter	-0.566412	9.99846	3.55355	0.0604544	0.160735
745364|Luteipulveratus	-0.566888	11.9855	4.0542	0.0450188	0.132201
104267|Tenacibaculum	-0.567407	8.9496	2.90079	0.0896468	0.220402
1209988|Halopenitus	-0.567975	7.28833	2.53783	0.112276	0.25538
1158|Oscillatoria	-0.568827	7.00193	3.24473	0.712883	0.847572
2055880|Pseudescherichia	-0.58121	7.78513	1.82614	0.177676	0.344412
33073|Zymobacter	-0.581585	8.60526	2.07321	0.151024	0.309793
154116|Georgenia	-0.584829	10.5449	2.55231	0.111261	0.253805
188143|Enterovibrio	-0.590509	7.75946	3.05675	0.0928642	0.224874
2675231|Mesobacillus	-0.597259	12.2832	2.25173	0.134593	0.286283
104264|Cellulophaga	-0.597262	7.84522	3.49784	0.0624929	0.164488
1826864|Candidatus Nitrosocosmicus	-0.598499	10.1126	2.2355	0.136	0.287616
178898|Carboxydocella	-0.603168	7.64279	2.80552	0.0950574	0.229479
178469|Arenibacter	-0.603977	8.74107	2.28008	0.132174	0.282665
1849|Actinopolyspora	-0.606619	13.1926	1.12876	0.288956	0.490105
762296|Methylovulum	-0.607462	8.13455	2.42563	0.120496	0.266377
53945|Octadecabacter	-0.607924	7.81055	3.02249	0.0832173	0.207253
282132|Candidatus Protochlamydia	-0.61246	10.7199	2.11326	0.147149	0.305398
458032|Chloracidobacterium	-0.616136	7.85594	2.3608	0.125548	0.271587
69578|Cryobacterium	-0.623351	11.3496	5.6862	0.0177651	0.0695578
367771|Marinovum	-0.623353	7.8247	2.99179	0.197283	0.37144
200903|Paraliobacillus	-0.629486	8.01894	2.4325	0.119974	0.26597
70774|Hydrogenophilus	-0.63125	12.3835	3.15098	0.0769684	0.195401
1652133|Halobacteriovorax	-0.636984	7.47338	2.98262	0.0852663	0.210359
63742|Natrialba	-0.637773	7.59905	2.67245	0.103223	0.240345
397864|Barnesiella	-0.640881	6.93858	18.1231	0.0105087	0.0480835
159345|Roseibacterium	-0.64751	7.61705	2.73974	0.0990016	0.23539
2679910|Intestinibaculum	-0.649354	8.10487	1.92564	0.166341	0.329749
1740|Thermodesulfobacterium	-0.653294	7.15593	4.3575	0.0377508	0.11731
1649459|Hungatella	-0.654993	8.25625	2.44725	0.118861	0.264954
360528|Pelagibaca	-0.656	8.01378	2.52311	0.113319	0.256269
96492|Frigoribacterium	-0.65898	9.01763	3.64925	0.0571165	0.153415
1759331|Cnuibacter	-0.660536	9.9884	5.16865	0.023756	0.0861247
499228|Tepidanaerobacter	-0.663758	7.12705	3.93702	0.201421	0.378017
1543705|Nitrospirillum	-0.664247	7.32605	3.9376	0.131964	0.282665
162491|Oerskovia	-0.664771	11.1169	4.45491	0.0356882	0.113083
387095|Maribius	-0.665536	9.73565	3.93929	0.0481472	0.138291
46254|Oenococcus	-0.669477	9.94626	3.74016	0.0541278	0.148946
46352|Agrococcus	-0.671829	14.0398	6.08214	0.0142552	0.0603165
1125|Microcystis	-0.674276	7.86751	3.47629	0.0633012	0.165508
1331051|Candidatus Saccharimonas	-0.674425	10.8939	3.79811	0.0523096	0.145469
83681|Nonomuraea	-0.677284	9.03357	3.88476	0.0497117	0.140226
227388|Thermodesulfobium	-0.679364	7.15904	3.08038	0.554381	0.728377
518733|Microterricola	-0.683019	10.4486	6.66709	0.0103295	0.0476756
1227|Nitrosococcus	-0.683478	8.42267	3.39839	0.0663174	0.17225
1097466|Defluviimonas	-0.684905	11.6614	3.63559	0.0575806	0.153759
73778|Methylocaldum	-0.685891	8.19614	3.42195	0.0653894	0.170402
51514|Dehalobacterium	-0.686379	7.66109	3.34589	0.0684373	0.176441
51366|Salinivibrio	-0.690042	7.96793	3.95721	0.0476445	0.137349
1470540|Jeotgalibaca	-0.693201	11.9997	2.44302	0.119179	0.264954
1653174|Actinotignum	-0.693553	8.66981	3.077	0.0805016	0.20306
254245|Aquicella	-0.696893	6.98171	7.90269	0.0803741	0.20306
33886|Rathayibacter	-0.699383	11.5279	6.67826	0.0102665	0.0476756
76634|Mycetocola	-0.704899	13.2086	3.77551	0.053011	0.146385
59734|Empedobacter	-0.706156	11.6615	3.86056	0.0504231	0.141725
1649474|Nibribacter	-0.708271	8.20331	2.57458	0.109721	0.25175
46205|Pseudobutyrivibrio	-0.709183	7.03143	6.31566	0.0556758	0.152142
119541|Rhodobaca	-0.714352	9.62683	4.93486	0.0271205	0.0932044
1230698|Marisediminicola	-0.718395	7.6018	4.30365	0.0389447	0.119259
2422|Fervidobacterium	-0.720605	8.25017	2.37118	0.124724	0.271587
280472|Aquiflexum	-0.724367	7.07102	3.93445	0.661615	0.811045
2335|Thermotoga	-0.727592	7.25352	3.67239	0.0563394	0.152368
2233801|Ahniella	-0.72935	9.25398	4.73047	0.0304701	0.102042
187217|Tunavirus	-0.738757	6.9877	8.04079	0.0258897	0.0900937
225143|Oceanisphaera	-0.740729	11.6585	3.04853	0.0819075	0.205603
79206|Desulfosporosinus	-0.740773	8.73191	2.73181	0.099489	0.235837
1433997|Diaminobutyricimonas	-0.744169	7.54155	3.89739	0.0493445	0.139691
380738|Candidatus Kuenenia	-0.744281	6.96781	9.91942	0.132009	0.282665
2321111|Aliiarcobacter	-0.744913	8.04298	4.11853	0.0433622	0.128293
1434010|Jatrophihabitans	-0.748165	10.5289	4.76962	0.0297965	0.100643
71|Simonsiella	-0.749516	7.20964	5.09472	0.0247701	0.0874172
1392389|Intestinimonas	-0.757763	11.0188	2.76244	0.097621	0.233519
2019482|Brevefilum	-0.757948	7.57881	3.4892	0.0628155	0.164786
400947|Deefgea	-0.758037	7.55977	3.65813	0.0568171	0.153134
458839|Actinotalea	-0.763176	9.56758	4.29608	0.0391157	0.119318
246875|Algoriphagus	-0.764051	10.6655	4.66011	0.0317213	0.104894
33877|Agromyces	-0.769371	11.6826	7.17005	0.00785116	0.0388608
958|Bdellovibrio	-0.771618	11.385	7.98064	0.00506821	0.0280893
1521255|Candidatus Paracaedibacter	-0.773334	10.9904	4.35245	0.0378611	0.11731
171163|Halosimplex	-0.774479	7.12418	5.33688	0.0216065	0.0809729
1960084|Rodentibacter	-0.77573	9.47691	4.12203	0.0432741	0.128293
36739|Dermabacter	-0.782073	10.9213	3.67863	0.0561318	0.152368
338321|Turneriella	-0.785939	7.07459	5.15485	0.0239418	0.0861247
401618|Candidatus Riesia	-0.787088	7.5632	4.9904	0.0262785	0.0907069
939|Hydrogenobacter	-0.788884	7.99402	3.01396	0.0836513	0.207677
90243|Oligella	-0.789265	11.317	2.75241	0.0982285	0.23426
1935188|Libanicoccus	-0.801547	7.23633	4.2897	0.219599	0.402944
1656823|Halanaeroarchaeum	-0.807168	7.1022	4.38797	0.554019	0.728377
2732587|Candidatus Vesicomyosocius	-0.807721	7.06677	6.35319	0.0353507	0.112636
45989|Methanoculleus	-0.812197	7.16583	4.5439	0.0339075	0.109816
2675233|Metabacillus	-0.814939	12.5097	4.56818	0.033438	0.109194
2675229|Peribacillus	-0.817763	11.7172	5.87777	0.0159668	0.0647726
2251|Haloferax	-0.820061	7.08359	6.48671	0.0114041	0.0509943
1649490|Rubinisphaera	-0.820335	8.98643	5.41295	0.020702	0.0787078
169133|Citricoccus	-0.830922	11.0493	4.66116	0.0317023	0.104894
232244|Belliella	-0.836919	8.17568	3.78758	0.0526352	0.145859
72763|Tessaracoccus	-0.837555	14.7378	6.0603	0.0144287	0.0604008
168808|Sneathia	-0.843181	8.5817	4.02584	0.0457703	0.133457
28196|Arcobacter	-0.843889	11.5785	4.67937	0.0313736	0.104623
869806|Marivirga	-0.851973	8.00287	4.37224	0.037431	0.116897
472568|Devriesea	-0.859611	9.16834	6.42509	0.0117971	0.0524536
984996|Mobilicoccus	-0.861194	11.6116	5.24841	0.0227103	0.0835188
2765402|Natrarchaeobaculum	-0.867435	8.13169	4.37576	0.0373549	0.116897
203193|Halobiforma	-0.868734	7.45697	4.8054	0.0291944	0.0990346
246861|Grimontia	-0.873614	7.95889	5.81207	0.0165613	0.0668397
157591|Sterolibacterium	-0.878942	10.4702	6.38849	0.0120371	0.0524695
57739|Vogesella	-0.879834	9.09943	4.42377	0.0363345	0.114381
28209|Chelatococcus	-0.88161	12.1355	12.1787	0.000561363	0.00513713
354203|Yangia	-0.893483	8.45547	6.50935	0.0112631	0.0506519
1778601|Apibacter	-0.895445	10.2987	4.33651	0.0382116	0.117932
2237|Haloarcula	-0.89592	7.13791	7.05071	0.0204683	0.0781968
67572|Psychromonas	-0.899243	8.41435	3.31415	0.0697539	0.178815
2600304|Baekduia	-0.899356	7.00954	10.2755	0.0023272	0.0157888
346096|Paludibacter	-0.900515	8.59713	5.0101	0.0259864	0.0900937
1073987|Halorientalis	-0.901312	7.27118	5.35853	0.0213449	0.0803754
1190|Fischerella	-0.905149	8.00569	3.85137	0.0506962	0.141985
194195|Alysiella	-0.905809	8.9539	4.19931	0.0413727	0.12442
1073531|Mycolicibacter	-0.90685	10.0254	7.13335	0.00800931	0.0393958
227873|Pannonibacter	-0.913471	10.293	6.67713	0.0102729	0.0476756
2276|Pyrobaculum	-0.918678	7.03761	10.0364	0.0258897	0.0900937
1647|Erysipelothrix	-0.919724	9.99042	4.87	0.0281395	0.0962859
2717089|Massilistercora	-0.920217	9.44269	3.72497	0.0546152	0.149764
1055688|Sandaracinus	-0.923962	11.5077	7.62143	0.00614907	0.0324787
527198|Mariniflexile	-0.925195	7.26519	4.58671	0.0330843	0.108489
36853|Desulfitobacterium	-0.926252	8.69386	5.145	0.0240755	0.0861247
156973|Dysgonomonas	-0.927755	8.61867	4.21831	0.0409191	0.123859
2697|Heliobacterium	-0.928335	6.96378	23.5738	0.00363846	0.0220267
114185|Candidatus Carsonella	-0.929872	8.07626	5.31923	0.0218221	0.0813933
59735|Bergeyella	-0.936865	8.14704	5.14514	0.0240736	0.0861247
292635|Laceyella	-0.93991	9.73701	4.19733	0.0414205	0.12442
2678343|Halalkaliarchaeum	-0.947047	6.99377	12.7523	0.057635	0.153759
347533|Zobellella	-0.948896	10.224	3.90249	0.0491969	0.139691
203133|Propionimicrobium	-0.950463	7.07204	9.45207	0.0119889	0.0524695
12141|Tombusvirus	-0.951063	6.96123	20.0818	0.004228	0.0244665
1161127|Murdochiella	-0.951254	8.85511	5.19883	0.0233545	0.0850925
1344552|Noviherbaspirillum	-0.951751	13.5434	6.96398	0.00878276	0.0421465
538|Eikenella	-0.956022	11.0424	6.22205	0.0131939	0.0567411
2038|Tropheryma	-0.956134	7.39736	8.4201	0.00832707	0.0404531
2005363|Auricoccus	-0.961742	12.7651	6.13908	0.0138131	0.0587615
2220|Methanolobus	-0.964192	7.10521	5.71667	0.0174656	0.0693599
39948|Dialister	-0.964494	9.11849	5.72406	0.0173938	0.0693599
1742992|Paenarthrobacter	-0.967985	11.8919	10.2784	0.00150197	0.0112576
1940138|Candidatus Walczuchella	-0.968384	7.27104	5.70025	0.0176264	0.0693599
286130|Sulfuricurvum	-0.973308	9.43861	3.95869	0.0476033	0.137349
76831|Myroides	-0.975818	10.9307	8.03703	0.00491716	0.0274454
1918540|Muribaculum	-0.976969	9.2588	4.3244	0.03848	0.118296
75905|Thermocrinis	-0.98198	7.89428	4.61142	0.0326187	0.10741
1676142|Wenzhouxiangella	-0.986471	8.1375	6.9955	0.00863322	0.0416831
191028|Leisingera	-0.999138	7.08633	10.2631	0.0072566	0.0366447
2071|Saccharothrix	-0.999854	9.99971	7.39621	0.00694498	0.036438
99479|Tetrasphaera	-1.00287	8.90769	5.3648	0.0212698	0.0803754
11646|Lentivirus	-1.0036	7.60611	3.36293	0.0677415	0.17537
875170|Celeribacter	-1.00629	11.1237	12.207	0.000553278	0.0051227
1632780|Phreatobacter	-1.01598	15.2573	4.82015	0.02895	0.0986307
1649463|Lentilitoribacter	-1.0285	7.05034	12.4478	0.0106042	0.0482398
673534|Plantactinospora	-1.02866	7.39267	7.80149	0.00558048	0.0302885
1186|Calothrix	-1.02931	6.96354	23.4618	0.00029638	0.00311001
929509|Solitalea	-1.04139	7.07668	8.74191	0.00337494	0.020914
461|Fluoribacter	-1.05008	9.08787	9.5713	0.00217639	0.0148941
947567|Litoreibacter	-1.06074	10.3481	7.34501	0.00714024	0.0366447
398041|Flavisolibacter	-1.06219	13.0485	10.8264	0.00112885	0.00876931
83551|Parachlamydia	-1.07228	9.5814	6.3766	0.0121162	0.0524695
1988031|Candidatus Promineofilum	-1.07676	10.2605	5.24886	0.0227046	0.0835188
2035811|Pseudodesulfovibrio	-1.08466	7.20011	9.10476	0.0181224	0.0706056
472825|Candidatus Purcelliella	-1.08622	7.26194	8.4117	0.00402393	0.0239912
1649|Kurthia	-1.08886	9.95166	5.70827	0.0175477	0.0693599
146784|Bacteriovorax	-1.08932	11.0662	7.07116	0.00828481	0.0404531
490567|Arenimonas	-1.0965	7.98223	8.33097	0.00420121	0.0244665
41273|Tissierella	-1.10334	7.5194	6.06423	0.0143973	0.0604008
294702|Proteiniphilum	-1.1113	8.38895	5.94882	0.0153488	0.0629142
2115980|Candidatus Phycorickettsia	-1.12514	7.84449	8.3401	0.00418075	0.0244665
332246|Halalkalicoccus	-1.13104	10.0351	5.11774	0.0244495	0.0870666
1906660|Candidatus Mikella	-1.13199	7.92532	7.31336	0.00726376	0.0366447
135575|Idiomarina	-1.13925	9.77602	6.81516	0.0095258	0.0453838
1274351|Kroppenstedtia	-1.14082	7.32889	6.18329	0.0134795	0.0576543
1611681|Mucinivorans	-1.15778	7.27755	9.91313	0.00181854	0.0132518
1565532|Rouxiella	-1.16154	10.0609	6.78229	0.00969845	0.0457046
34102|Sphaerotilus	-1.16263	13.1591	12.8704	0.000393918	0.00397453
1906945|Parageobacillus	-1.16903	13.4762	6.04967	0.0145139	0.0604363
2420|Thermosipho	-1.18821	7.27354	9.29237	0.00252122	0.0168822
1981050|Phoenicibacter	-1.18835	7.02047	16.0578	0.0119529	0.0524695
158876|Yokenella	-1.20091	7.50657	7.73769	0.00577551	0.0307117
1988|Actinomadura	-1.21116	8.64592	10.8133	0.00113656	0.00876931
1551504|Candidatus Babela	-1.21403	9.35997	6.66189	0.010359	0.0476756
2304693|Pseudoclostridium	-1.22365	8.44208	7.34518	0.00713959	0.0366447
1825023|Candidatus Nitrosotenuis	-1.22889	7.47206	7.21855	0.00764708	0.0380902
2049301|Changchengzhania	-1.24297	7.03455	13.2206	0.0429371	0.127998
1184606|Austwickia	-1.28744	11.1091	12.8447	0.00039912	0.00397605
1936111|Fuerstia	-1.28798	8.4849	8.89746	0.00310735	0.0197216
334202|Mupapillomavirus	-1.29697	7.0157	18.6963	0.000712447	0.00609452
1283313|Alloprevotella	-1.31444	7.90103	7.23512	0.00757862	0.0379896
10358|Cytomegalovirus	-1.32988	7.4096	6.53655	0.0170242	0.0683573
2078575|Psychromicrobium	-1.33972	10.2422	14.0456	0.000216735	0.0024024
2735|Verrucomicrobium	-1.34265	7.37118	12.4417	0.000490504	0.0046763
285107|Thioclava	-1.34802	11.9581	15.5606	0.000101082	0.00124299
33024|Phascolarctobacterium	-1.35062	8.5969	9.28484	0.00253126	0.0168822
60846|Halogeometricum	-1.36478	7.03749	17.1021	4.68776e-05	0.000658798
1682492|Candidatus Tachikawaea	-1.3725	7.63597	9.74878	0.00198241	0.0141833
1505663|Erysipelatoclostridium	-1.37289	8.63933	9.1509	0.00271696	0.0178187
2304692|Hungateiclostridium	-1.38621	7.90503	11.4826	0.000803471	0.0067692
465|Tatlockia	-1.38683	10.3361	11.4704	0.000808519	0.0067692
52959|Polaribacter	-1.38704	9.19714	9.12371	0.00275632	0.0179275
241192|Thermodesulfatator	-1.3911	7.32793	11.7321	0.0007064	0.00609452
1779136|Bradymonas	-1.41173	9.10021	9.60008	0.00214366	0.0147988
233189|Anaerolinea	-1.4208	7.77916	8.42744	0.00399027	0.0239721
2529408|Schaalia	-1.45417	11.4573	14.6804	0.000157292	0.0018476
1616789|Salinispira	-1.47127	7.53071	8.86634	0.0031591	0.0198897
307628|Petrimonas	-1.47303	9.12189	8.94072	0.00303687	0.019431
644355|Inhella	-1.50441	8.75112	11.7321	0.000706381	0.00609452
160795|Ureibacillus	-1.50788	10.8467	10.1189	0.00163271	0.0121221
2211641|Yoonia	-1.51732	10.3804	12.0094	0.00061239	0.00553967
990721|Christensenella	-1.52191	8.92177	9.23605	0.00259735	0.0171774
292486|Avibacterium	-1.53725	7.85073	14.5208	0.000904749	0.00726569
186831|Acetoanaerobium	-1.54004	9.84882	8.68177	0.0034846	0.0212803
2689587|Suicoccus	-1.56352	12.2094	9.99365	0.00174337	0.0128227
1573534|Faecalitalea	-1.57951	7.38389	11.263	0.000900085	0.00726569
370735|Zhihengliuella	-1.58779	8.98158	15.6113	9.85433e-05	0.00123101
1511635|Aquisphaera	-1.59733	7.8921	9.71253	0.00202055	0.014198
1861863|Sinimarinibacterium	-1.60287	7.24442	12.9129	0.000385465	0.00393976
1205|Trichodesmium	-1.61267	7.1406	14.7913	0.000148751	0.00177374
1784836|Fermentimonas	-1.64248	10.0307	8.79504	0.00328098	0.0204931
28228|Colwellia	-1.66777	10.612	14.9747	0.000135636	0.00164224
596707|Sinomonas	-1.68518	11.2509	18.1288	2.82138e-05	0.000444085
1663717|Herbinix	-1.68976	11.1317	15.9315	8.39591e-05	0.00108321
2051044|Tuwongella	-1.70067	7.2136	13.5669	0.000276289	0.00297863
74032|Antarctobacter	-1.71695	8.46035	12.2426	0.000543261	0.00508984
1508657|Ruminiclostridium	-1.80477	7.22818	17.9505	3.0807e-05	0.000457454
529883|Rhodoluna	-1.81033	13.3543	12.5192	0.00047142	0.00463759
167639|Ilyobacter	-1.83234	7.44144	15.6641	9.59766e-05	0.00121828
1511648|Defluviitoga	-1.84678	7.28983	18.8912	1.93888e-05	0.000331716
2160|Methanobacterium	-1.88636	9.40519	12.4752	0.000482173	0.0046763
1930845|Ndongobacter	-1.92209	9.1316	11.3502	0.00086036	0.00705316
1843210|Anaerocolumna	-1.95603	7.29711	18.0673	2.90827e-05	0.000448785
898|Desulfomicrobium	-2.04573	9.00393	13.8214	0.000242811	0.00265406
44258|Caloramator	-2.12092	8.60499	19.4019	1.50951e-05	0.000277627
1649478|Pelolinea	-2.13752	8.33316	14.6425	0.00016033	0.00185558
146|Spirochaeta	-2.28693	9.57053	16.6365	5.90766e-05	0.000801608
1562|Desulfotomaculum	-2.31675	8.18116	20.7839	7.69313e-06	0.000157039
56106|Cylindrospermum	-2.37563	7.5557	17.8641	3.21498e-05	0.000460035
1941236|Gemykibivirus	-2.40127	9.69954	23.6857	1.89746e-06	4.76052e-05
44000|Caldicellulosiruptor	-2.43143	9.76792	17.0443	4.82411e-05	0.000666066
508459|Cloacibacillus	-2.66499	7.81265	20.7602	7.78211e-06	0.000157039
1055323|Aeribacillus	-2.71889	13.5462	24.8113	1.10834e-06	3.03934e-05
2282740|Desulfallas	-2.73527	7.61629	20.8753	7.35907e-06	0.000157039
2207|Methanosarcina	-2.79481	8.82556	17.9655	3.0581e-05	0.000457454
2685905|Salicibibacter	-2.80583	11.3523	17.8849	3.18213e-05	0.000460035
1729679|Faecalibaculum	-2.81731	9.8702	21.0172	6.86899e-06	0.000154454
267849|Nitrincola	-2.90317	9.651	24.7894	1.11996e-06	3.03934e-05
57665|Sulfurospirillum	-2.91703	7.89573	26.5079	4.95436e-07	1.49965e-05
1193324|Alkalitalea	-3.01335	10.9365	20.8596	7.41522e-06	0.000157039
171003|Caloranaerobacter	-3.19272	9.10684	23.8923	1.71877e-06	4.50891e-05
2732977|Citexvirus	-3.33677	7.44781	32.6574	3.37523e-08	1.56253e-06
76833|Actinobaculum	-3.38533	11.0756	30.8267	6.55429e-08	2.34465e-06
379068|Galbibacter	-3.57567	9.36567	32.5891	2.9014e-08	1.42712e-06
1911573|Haloprofundus	-4.0156	7.70148	32.185	4.17678e-08	1.64356e-06
2222|Methanothrix	-4.10486	9.24155	31.9416	3.91147e-08	1.62017e-06
157226|Jeotgalibacillus	-4.32844	16.914	18.7914	2.03634e-05	0.000340979
10375|Lymphocryptovirus	-4.41713	7.94927	29.3541	1.51285e-07	4.9609e-06
687333|Gammatorquevirus	-4.62304	8.33001	35.7044	6.96674e-09	4.21756e-07
687332|Betatorquevirus	-4.77941	8.16171	31.8643	4.82835e-08	1.80948e-06
40272|Roseolovirus	-6.88737	10.7422	41.5136	5.09604e-10	3.64598e-08
687331|Alphatorquevirus	-9.09761	14.2345	57.8953	4.23825e-13	4.16938e-11
10405|Orthohepadnavirus	-13.3734	16.499	61.9562	7.7488e-14	8.71187e-12

## Sheet: kraken2 colorectum OvR
genus	logFC	logCPM	F	PValue	FDR
10509|Mastadenovirus	4.70301	6.79895	89.5898	1.45578e-18	5.72851e-16
2093|Mycoplasma	3.74588	16.0468	152.662	3.83036e-28	3.01449e-25
2036021|Agarilytica	2.85975	8.53773	74.112	6.00754e-16	1.57598e-13
316625|Saccharophagus	2.74089	8.57189	59.385	2.42655e-13	3.81939e-11
273135|Candidatus Cardinium	2.19918	8.74228	65.2551	2.14562e-14	4.22151e-12
1551504|Candidatus Babela	2.09405	10.2928	38.2037	2.31726e-09	1.21579e-07
204447|Skermanella	2.08852	13.7244	49.1981	1.8294e-11	1.74026e-09
2282523|Methylorubrum	1.89327	16.246	19.9611	1.15966e-05	0.000246663
1125|Microcystis	1.88194	12.1169	45.0308	1.12066e-10	8.01783e-09
2717|Cardiobacterium	1.86043	10.5536	47.4572	3.88823e-11	3.06004e-09
1537406|Bacterioplanes	1.84245	7.92482	25.8803	6.77303e-07	2.05014e-05
159191|Nodularia	1.78916	8.91897	30.0701	9.5089e-08	3.93869e-06
1920864|Rtpvirus	1.62624	5.8538	15.2316	0.000119919	0.00171593
187492|Thalassolituus	1.56474	7.85825	28.9973	1.5666e-07	5.87104e-06
2675230|Cytobacillus	1.56348	11.4368	14.8973	0.000141822	0.00189175
1649279|Epibacterium	1.5271	7.42939	16.0487	7.97037e-05	0.00120954
44|Melittangium	1.44702	9.97581	14.3598	0.000185894	0.00228592
1543705|Nitrospirillum	1.44628	10.1951	34.4342	1.27662e-08	5.58165e-07
456492|Saccharibacillus	1.41148	9.05201	24.283	1.44587e-06	3.79301e-05
2425|Teredinibacter	1.35692	10.1187	14.3743	0.000184542	0.00228592
407217|Aquitalea	1.33531	10.3404	16.2623	7.16591e-05	0.00116336
752201|Sphaerospermopsis	1.29553	7.70614	12.113	0.000582903	0.00588134
377315|Mariprofundus	1.29066	10.7606	24.3387	1.40799e-06	3.79301e-05
244698|Gillisia	1.28563	7.82843	13.6834	0.000261682	0.00295336
1163|Anabaena	1.2716	10.3148	21.7155	4.95318e-06	0.000121817
2483368|Sedimentisphaera	1.25587	7.7022	18.1731	2.78311e-05	0.000547578
908623|Euzebya	1.21863	10.3401	24.3593	1.39426e-06	3.79301e-05
204456|Gemmobacter	1.20811	10.0001	27.1681	3.68981e-07	1.26256e-05
1209988|Halopenitus	1.18485	6.24965	11.609	0.000755427	0.0071629
1740|Thermodesulfobacterium	1.1742	8.2845	16.0642	7.90917e-05	0.00120954
119044|Filomicrobium	1.16816	10.0568	27.2577	3.53759e-07	1.26256e-05
1433993|Chryseolinea	1.15543	10.5707	17.268	4.34988e-05	0.000787979
29526|Syntrophobacter	1.13955	8.81247	13.9576	0.00022777	0.00267776
1237|Piscirickettsia	1.12378	8.65044	14.5195	0.000171517	0.00217715
93682|Roseivivax	1.11945	8.83878	17.8698	3.23157e-05	0.000620303
376488|Halotalea	1.10684	8.33443	11.3163	0.00087861	0.0080397
299261|Tateyamaria	1.09549	7.5471	11.148	0.000958535	0.00857235
447467|Simiduia	1.06059	7.55855	13.5394	0.000281516	0.00308688
1847725|Lawsonella	1.05686	14.3392	20.8966	7.36035e-06	0.000165503
41273|Tissierella	1.049	8.27066	13.6759	0.000262688	0.00295336
89966|Hymenobacter	1.01401	14.2564	15.7497	9.25296e-05	0.00137398
40222|Methylophaga	1.00532	11.3089	6.79724	0.00963296	0.0488057
246861|Grimontia	0.967843	7.3135	7.33983	0.00717176	0.0397477
1755829|Ichthyobacterium	0.965264	7.36424	10.519	0.00132878	0.011125
191769|Marinilactibacillus	0.965047	10.6284	7.32364	0.00723492	0.0398173
1543704|Niveispirillum	0.964656	9.4884	17.6411	3.61751e-05	0.000677853
1231242|Ferrovibrio	0.944481	12.6576	7.564	0.00635336	0.036497
649460|Filimonas	0.898637	9.90836	15.1178	0.00012696	0.00178424
649461|Lacibacter	0.893052	10.7263	16.2407	7.24326e-05	0.00116336
359407|Methylotenera	0.892786	11.3564	9.45955	0.00231415	0.0176819
157591|Sterolibacterium	0.888687	12.2157	10.385	0.00142485	0.0118038
146|Spirochaeta	0.878669	9.74734	9.65809	0.00208464	0.0162437
1077265|Chthonomonas	0.871836	9.91339	16.7732	5.5587e-05	0.000972155
1158|Oscillatoria	0.841682	13.5098	5.28002	0.0223295	0.0883859
1906660|Candidatus Mikella	0.81696	10.6945	2.27288	0.132814	0.28098
1485594|Methyloligella	0.815718	8.08409	11.3514	0.00086284	0.0080397
79603|Denitrobacterium	0.805772	8.79664	9.39441	0.00239495	0.0179507
432330|Tumebacillus	0.803245	10.3385	10.6357	0.00125045	0.0106968
2025617|Ketobacter	0.784565	10.2534	4.95985	0.0267599	0.0979535
360528|Pelagibaca	0.781218	8.19753	7.79958	0.00559618	0.0330294
242605|Luteibacter	0.765481	12.3743	6.19085	0.0134392	0.0604381
1007|Saprospira	0.764398	8.9028	5.60356	0.0186232	0.0771394
893|Desulfobulbus	0.7595	9.03664	7.92774	0.00522383	0.0313828
252306|Robiginitalea	0.750995	7.50096	6.2862	0.0127506	0.0585717
2024975|Silvanigrella	0.741772	7.01673	5.62907	0.0183596	0.0768565
529881|Candidatus Aquiluna	0.740437	10.2395	11.6313	0.000746789	0.0071629
104204|Streptomonospora	0.708373	9.00987	7.08994	0.00821295	0.0432355
153265|Aequorivita	0.708332	8.47309	5.02703	0.0257595	0.0954026
469322|Steroidobacter	0.701878	12.0486	14.7804	0.000150406	0.00197282
830|Butyrivibrio	0.697688	10.3694	7.12469	0.00805931	0.0428559
1522431|Thermosulfurimonas	0.692278	6.36477	4.81406	0.0290731	0.104477
1964366|Nissabacter	0.690038	7.42332	3.00165	0.0843115	0.218267
2608728|Acidisarcina	0.682135	10.1041	8.54825	0.00374916	0.024385
1221880|Psychrobacillus	0.678433	9.1836	5.66103	0.0180349	0.076061
2375|Sporomusa	0.673233	12.1282	2.8119	0.0947147	0.224354
83612|Psychroflexus	0.663785	8.27768	4.35173	0.0379017	0.124621
79206|Desulfosporosinus	0.661147	12.6983	4.34707	0.0380039	0.124621
1744881|Sulfuricaulis	0.660384	10.6404	4.71453	0.0307719	0.106217
1861863|Sinimarinibacterium	0.655922	12.4979	5.09694	0.02476	0.0937807
2740557|Pauljensenia	0.653644	9.26607	4.74455	0.0302488	0.106013
2680004|Protaetiibacter	0.647362	8.93991	8.6535	0.00354498	0.0234066
1227|Nitrosococcus	0.640677	10.0704	7.76895	0.00568915	0.0331657
1509243|Candidatus Nucleicultrix	0.631229	10.5595	4.86977	0.0281654	0.102148
1434032|Pontimonas	0.628635	10.5329	4.74108	0.0303088	0.106013
2698688|Paraflavitalea	0.627729	9.78696	7.27936	0.00741055	0.0405007
58050|Moritella	0.627496	8.13925	5.07883	0.0250149	0.0941947
986106|Acidiferrobacter	0.626643	10.7423	4.78275	0.0295966	0.104921
2732587|Candidatus Vesicomyosocius	0.624323	8.25321	1.59712	0.207392	0.373496
1084558|Oceanicoccus	0.620074	7.14668	3.28566	0.0709883	0.195342
413435|Solimonas	0.615553	12.5149	5.78011	0.0168765	0.072578
1203|Scytonema	0.613548	11.4641	4.07121	0.0446003	0.1386
1505664|Gottschalkia	0.61052	9.7331	2.63543	0.10566	0.236847
929509|Solitalea	0.610214	8.58067	5.0951	0.0247857	0.0937807
1649480|Planctopirus	0.603986	9.77775	4.28064	0.0394921	0.126004
1511635|Aquisphaera	0.60215	10.9133	5.88059	0.0159591	0.0693913
208215|Parvularcula	0.580537	7.2181	3.981	0.0470123	0.143964
2304693|Pseudoclostridium	0.576936	8.47013	2.57133	0.109975	0.242437
61434|Dehalococcoides	0.568858	11.8293	5.17049	0.023752	0.0916314
180541|Salinisphaera	0.56637	8.99851	4.26855	0.0397693	0.126004
2147|Acholeplasma	0.563978	10.3491	8.76125	0.00334773	0.0226913
1970191|Salinivirga	0.556745	7.96231	3.48613	0.0629592	0.17696
1649510|Variibacter	0.550028	10.1957	7.4338	0.00681623	0.0380452
1882917|Pajaroellobacter	0.547776	9.78266	6.65684	0.0104017	0.0508457
236752|Fastidiosipila	0.545729	10.6543	1.73126	0.189356	0.35147
188143|Enterovibrio	0.542811	6.9549	2.9576	0.0866106	0.221307
187217|Tunavirus	0.542601	4.70087	1.23099	0.268193	0.441104
33073|Zymobacter	0.542525	7.56236	2.72829	0.0997368	0.228481
1004301|Flavihumibacter	0.539852	9.96213	6.35946	0.0122463	0.056693
1434050|Zhongshania	0.537551	6.61148	2.1204	0.1465	0.29639
1524217|Labilithrix	0.534285	11.6258	5.027	0.02576	0.0954026
1395974|Tardiphaga	0.533544	11.3275	8.74825	0.00337093	0.0226913
379070|Gilvibacter	0.531607	7.21044	2.34305	0.127003	0.272621
1433402|Glycocaulis	0.527102	10.2255	4.73319	0.0304457	0.106021
29407|Rhodoplanes	0.523174	11.7176	5.99664	0.0149637	0.0654247
162171|Magnetococcus	0.520592	8.58092	2.64303	0.105161	0.236463
146918|Salinibacter	0.504543	8.16188	4.2206	0.0408899	0.128209
504090|Kushneria	0.50445	9.96329	3.05819	0.0814573	0.212275
2060722|Labilibaculum	0.501824	9.54194	2.85485	0.0922427	0.224059
28196|Arcobacter	0.501012	11.2681	3.52296	0.061593	0.175281
416|Methylomonas	0.500787	9.19408	3.88488	0.0497349	0.151125
1209327|Flavivirga	0.497498	6.30629	2.01102	0.157303	0.311049
109262|Halothiobacillus	0.490034	11.569	2.8394	0.0931234	0.224167
1869285|Allofrancisella	0.485604	8.64368	1.7608	0.185636	0.34702
427753|Humibacter	0.484814	9.65053	2.73003	0.0996295	0.228481
253238|Ethanoligenens	0.479683	10.1888	2.88954	0.0902976	0.221996
1099|Pelodictyon	0.478671	6.5355	2.24831	0.134918	0.284667
379899|Niabella	0.472466	10.5176	5.47363	0.0200281	0.0808314
57495|Dermacoccus	0.470663	10.6538	2.73898	0.0990788	0.228481
1190|Fischerella	0.470507	10.6377	2.03264	0.155098	0.308238
366614|Haematobacter	0.46705	10.9912	3.27176	0.0715842	0.196217
261825|Agarivorans	0.466648	7.67531	2.2288	0.136617	0.28595
1769012|Arachidicoccus	0.465246	11.4593	6.3995	0.0119794	0.0561682
105|Runella	0.464938	9.09161	2.72614	0.0998697	0.228481
1443590|Ferriphaselus	0.463031	9.31368	1.90901	0.168205	0.326053
238783|Pseudorhodobacter	0.459053	9.55234	2.59328	0.108476	0.241159
644355|Inhella	0.458578	12.1647	4.36901	0.0375255	0.124086
2700084|Urechidicola	0.457583	7.30518	2.04377	0.153976	0.306782
2600304|Baekduia	0.452888	11.9198	3.73298	0.0543851	0.161913
363408|Nonlabens	0.44926	8.81917	2.84521	0.0927915	0.224167
191028|Leisingera	0.448681	9.62066	3.36724	0.0675955	0.187978
34067|Cycloclasticus	0.444699	6.74237	1.77486	0.183895	0.34702
2661818|Saliniradius	0.442381	6.00919	1.93808	0.165013	0.321448
168934|Thalassospira	0.438754	9.231	3.3323	0.0690268	0.191282
1579506|Roseimaritima	0.435865	7.27653	1.66534	0.197978	0.360668
159345|Roseibacterium	0.434841	9.1418	2.05797	0.152559	0.305507
2129|Ureaplasma	0.430563	8.7942	2.73165	0.0995295	0.228481
1134403|Melioribacter	0.424999	8.75155	3.56925	0.0599208	0.172739
191303|Turicibacter	0.421676	11.999	1.32913	0.249971	0.42398
143222|Salegentibacter	0.421385	8.88868	1.14072	0.286445	0.464263
434|Acetobacter	0.418958	11.4282	6.53125	0.011143	0.0533031
252356|Maribacter	0.417334	7.8095	1.95022	0.163699	0.319681
233191|Caldilinea	0.416621	10.7679	2.91194	0.0890657	0.221996
203804|Candidatus Blochmannia	0.415615	11.508	2.90623	0.0893779	0.221996
1078904|Candidatus Nitrosotalea	0.41552	5.26345	1.11169	0.292649	0.468957
1849822|Paraclostridium	0.415227	7.16845	1.25733	0.263145	0.43599
41707|Lawsonia	0.415114	9.03502	2.98831	0.0850009	0.218861
1902583|Candidatus Desulfofervidus	0.413777	9.10326	2.82425	0.0939964	0.224167
334202|Mupapillomavirus	0.409587	3.96731	0.910138	0.968595	0.98364
47251|Leptolyngbya	0.408683	12.3028	1.40529	0.236873	0.408951
29393|Dolosigranulum	0.396602	12.5022	2.32597	0.128391	0.273944
28050|Lachnospira	0.395226	9.66687	1.52432	0.21803	0.387336
933|Thiomicrospira	0.391864	9.16699	2.16444	0.14239	0.29189
292691|Gramella	0.391326	9.49484	1.70858	0.192272	0.354375
1172191|Catenovulum	0.372462	9.48446	1.13249	0.288187	0.465714
104264|Cellulophaga	0.369653	8.37455	1.72268	0.190454	0.352675
947525|Miniimonas	0.367654	10.1002	2.2159	0.137752	0.286802
1738655|Woeseia	0.359028	9.37365	1.00182	0.31776	0.495659
2058174|Antarcticibacterium	0.351371	10.7523	0.616913	0.432879	0.596408
59739|Flammeovirga	0.350735	8.18624	1.78713	0.182391	0.34702
1827478|Youhaiella	0.34846	7.85383	1.62986	0.20281	0.366082
2733115|Naesvirus	0.345335	4.09733	0.991319	0.320304	0.495659
1911577|Oryzomicrobium	0.342775	12.0957	2.37217	0.124676	0.268822
1754|Thermoanaerobacter	0.33983	9.21531	1.5178	0.219015	0.388209
249529|Caldanaerobacter	0.339316	7.86024	1.27758	0.259343	0.431508
655352|Cohaesibacter	0.338624	7.76042	2.32532	0.128444	0.273944
169055|Nordella	0.329512	10.5396	3.71906	0.0548337	0.162233
33951|Acetobacterium	0.328764	9.51731	0.997609	0.318776	0.495659
1335745|Spiribacter	0.32788	10.4288	1.04132	0.308419	0.486424
1649454|Glaciihabitans	0.323379	9.89344	1.42166	0.234169	0.407723
178898|Carboxydocella	0.321478	8.00351	1.05878	0.304405	0.482026
832|Fibrobacter	0.317531	8.72674	1.76888	0.184633	0.34702
135575|Idiomarina	0.314558	9.34896	1.06374	0.303278	0.481209
869|Dichelobacter	0.299326	8.90954	0.666122	0.41512	0.581423
33001|Desulfurella	0.297172	7.79944	1.37523	0.24194	0.413927
1051|Ectothiorhodospira	0.295275	9.78815	0.584619	0.445169	0.606041
1524214|Vulgatibacter	0.295201	8.79604	1.33518	0.248898	0.423073
36739|Dermabacter	0.294171	11.2601	0.934304	0.334604	0.514939
1186|Calothrix	0.284903	12.8852	0.910679	0.34078	0.519756
2028344|Ereboglobus	0.280071	8.69749	0.760654	0.383892	0.559645
1518147|Wenyingzhuangia	0.279639	6.88082	0.756329	0.385245	0.560422
93|Stella	0.278124	12.4371	1.40481	0.236953	0.408951
773|Bartonella	0.276785	11.1199	2.87493	0.0911115	0.221996
112040|Zobellia	0.274502	6.8194	0.409452	0.522786	0.664673
153135|Gammaretrovirus	0.274066	6.63883	0.226233	0.634712	0.752762
1769729|Hathewaya	0.268781	7.37735	0.619552	0.431898	0.596322
1906657|Candidatus Doolittlea	0.267807	6.70631	0.746682	0.388289	0.561734
79328|Chitinophaga	0.267276	11.8355	2.87571	0.0910676	0.221996
69474|Orientia	0.258604	8.86166	1.39285	0.238954	0.410605
299566|Adhaeribacter	0.255412	11.4162	0.692057	0.406194	0.573923
2172|Methanobrevibacter	0.254849	9.68898	0.450133	0.50284	0.649641
2051044|Tuwongella	0.251202	10.4883	1.50413	0.221096	0.389458
47|Archangium	0.248101	9.8069	0.700735	0.403271	0.571845
1443919|Tabrizicola	0.247177	10.1006	1.12538	0.289702	0.466909
53392|Thiodictyon	0.24705	9.18818	0.564032	0.453288	0.612952
323620|Shinella	0.240902	9.75933	1.29145	0.256779	0.429055
890|Desulfuromonas	0.239108	9.27763	0.602151	0.438431	0.6005
351195|Salimicrobium	0.238696	9.24361	0.453785	0.501114	0.649641
754249|Luteimicrobium	0.235765	9.47853	0.528986	0.467658	0.623307
1156568|Methylovirgula	0.233036	8.31075	0.849907	0.357394	0.532621
573657|Candidatus Hodgkinia	0.223555	11.5564	0.761064	0.383764	0.559645
233189|Anaerolinea	0.223442	10.8842	0.55597	0.456532	0.615107
1649478|Pelolinea	0.222538	10.2166	0.448672	0.503534	0.649641
556257|Pseudolabrys	0.221798	10.6889	1.76097	0.185615	0.34702
111500|Muricauda	0.220802	8.29141	0.475004	0.49128	0.644396
2233801|Ahniella	0.218914	8.26349	0.692995	0.405877	0.573923
1299429|Yuavirus	0.218154	4.96952	0.195291	0.6589	0.769368
2045213|Candidatus Fonsibacter	0.213497	8.82759	0.623636	0.430386	0.595279
1934947|Immundisolibacter	0.210976	10.0774	0.760307	0.384	0.559645
89404|Glaciecola	0.202377	8.1955	0.477783	0.490017	0.644396
1937972|Bernardetia	0.197062	7.53067	0.475179	0.491201	0.644396
75905|Thermocrinis	0.196591	8.17327	0.266071	0.606398	0.729574
278993|Thermincola	0.196588	8.07131	0.615314	0.433475	0.596408
458032|Chloracidobacterium	0.196102	10.6158	1.13952	0.286698	0.464263
1055688|Sandaracinus	0.195838	11.0823	1.16245	0.281911	0.459345
104267|Tenacibaculum	0.193171	8.92793	0.553497	0.457534	0.615107
240411|Chitinimonas	0.192756	9.78116	0.319667	0.572273	0.707857
1335631|Frischella	0.190661	7.80208	0.304642	0.581439	0.713873
114185|Candidatus Carsonella	0.189514	9.58974	0.508543	0.476381	0.630104
682522|Ilumatobacter	0.186449	11.6464	0.814242	0.367666	0.542877
1734920|Pseudorhodoplanes	0.184913	9.69779	0.930227	0.335659	0.514939
1676125|Thermogutta	0.183213	9.1841	0.490989	0.484085	0.638149
655184|Candidatus Thioglobus	0.181647	8.87288	0.318555	0.572941	0.707857
387095|Maribius	0.181614	9.87142	0.226543	0.63448	0.752762
265570|Sulfurovum	0.180274	8.68352	0.15153	0.697381	0.797731
365348|Pelosinus	0.177548	9.71142	0.427174	0.51393	0.65646
1649490|Rubinisphaera	0.177217	8.37033	0.389339	0.533169	0.675691
51366|Salinivibrio	0.176576	6.60954	0.264997	0.607125	0.729574
75687|Neptunomonas	0.175452	7.38067	0.257069	0.612551	0.733756
651660|Paenisporosarcina	0.173886	10.8611	0.345667	0.557064	0.695793
768|Anaplasma	0.170822	8.6144	0.708559	0.400661	0.571144
47670|Lautropia	0.166587	13.8055	0.84298	0.359358	0.533613
1632780|Phreatobacter	0.163217	14.3283	0.344251	0.557872	0.695793
155977|Acaryochloris	0.158804	8.68563	0.288998	0.591302	0.71925
76831|Myroides	0.158564	9.31899	0.34462	0.557661	0.695793
1960084|Rodentibacter	0.156326	6.10619	0.208545	0.648274	0.765771
232523|Hylemonella	0.152307	10.3559	0.263163	0.608371	0.72986
203133|Propionimicrobium	0.146073	10.2224	0.500572	0.479854	0.633632
417127|Zunongwangia	0.140405	7.63185	0.122223	0.726906	0.820767
114627|Alkaliphilus	0.136137	8.39936	0.198367	0.656396	0.768732
28895|Thermoanaerobacterium	0.132428	11.6256	0.184409	0.667951	0.776481
1100891|Paenalcaligenes	0.132213	10.3869	0.225698	0.635113	0.752762
1085622|Propioniciclava	0.126353	11.0455	0.237029	0.626752	0.747354
29287|Natronococcus	0.123754	8.82216	0.108962	0.741583	0.832562
34019|Liberibacter	0.121788	11.433	0.467856	0.494557	0.647614
2049301|Changchengzhania	0.121523	6.21732	0.099645	0.752498	0.838003
335405|Sphingosinicella	0.11454	11.1468	0.40957	0.522726	0.664673
2690159|Anaerohalosphaera	0.112975	8.25363	0.129459	0.719273	0.813315
283735|Leeuwenhoekiella	0.109105	6.39897	0.081327	0.775724	0.855035
953|Wolbachia	0.103871	10.9641	0.226167	0.634762	0.752762
388463|Edaphobacter	0.0958662	8.14491	0.0993782	0.752818	0.838003
123|Pirellula	0.0926047	10.192	0.134622	0.713972	0.811988
2115980|Candidatus Phycorickettsia	0.0911886	9.08726	0.193607	0.66028	0.769838
264688|Trichormus	0.0869841	6.66431	0.0663234	0.796962	0.865905
68288|Cyclobacterium	0.075283	7.88569	0.0700356	0.791485	0.862741
59282|Blastochloris	0.0730882	10.1407	0.182074	0.669934	0.777638
171|Leptospira	0.0715049	10.8793	0.0792475	0.778533	0.856931
414371|Aureimonas	0.070175	10.8794	0.0843811	0.771667	0.852952
1677050|Novibacillus	0.0686595	9.89838	0.0608151	0.805398	0.873069
44260|Moorella	0.0672527	8.02062	0.0730386	0.787168	0.861615
290174|Aquimarina	0.0671299	9.21023	0.0558042	0.813432	0.878266
958|Bdellovibrio	0.0660087	12.0787	0.156527	0.692684	0.793512
46205|Pseudobutyrivibrio	0.0638632	8.56501	0.0297471	0.863193	0.913082
1129704|Kyrpidia	0.0628603	9.30535	0.0709041	0.790226	0.862563
1649474|Nibribacter	0.0600629	8.469	0.0254229	0.873436	0.919298
697025|Hoyosella	0.0550755	9.31884	0.0457296	0.830828	0.893254
1759331|Cnuibacter	0.0536419	6.93571	0.0223361	0.881307	0.924785
1273155|Thiohalobacter	0.0510613	9.06301	0.0340278	0.853785	0.905707
1981050|Phoenicibacter	0.0494418	8.06439	0.0254019	0.873488	0.919298
52959|Polaribacter	0.046386	9.25941	0.0256726	0.872821	0.919298
2256|Natronobacterium	0.0443829	6.37259	0.0155235	0.900938	0.933729
1471399|Draconibacterium	0.0431754	7.75329	0.0207043	0.885694	0.926916
31988|Aminobacter	0.0422254	10.1385	0.0485913	0.825698	0.888953
1569|Sporosarcina	0.0404032	12.3079	0.0136648	0.907028	0.935559
1755825|Egicoccus	0.0384938	9.71424	0.0152166	0.901917	0.933729
2675231|Mesobacillus	0.0378224	9.25463	0.0150036	0.902602	0.933729
2707020|Aerosticca	0.0371337	8.70515	0.0207084	0.885683	0.926916
1649468|Melaminivora	0.0356381	11.3405	0.0368027	0.84801	0.903523
358023|Lutibacter	0.0299874	6.92702	0.00772061	0.930047	0.951817
881616|Herbiconiux	0.0255713	8.66899	0.0108934	0.916951	0.9438
329857|Cohnella	0.0253698	10.2182	0.00902311	0.924393	0.948497
175304|Lentibacillus	0.0183759	10.9472	0.0036212	0.952059	0.971817
1849828|Paeniclostridium	0.0179644	8.78091	0.00154831	0.968641	0.98364
11019|Alphavirus	0.0174471	4.58682	0.0366042	0.848416	0.903523
670486|Dehalogenimonas	0.00764486	8.73962	0.00106141	0.974034	0.98745
162289|Peptoniphilus	0.00558488	12.5533	0.000601037	0.980459	0.98745
1855416|Qipengyuania	0.00532061	9.47398	0.000532656	0.981604	0.98745
1912215|Acidipropionibacterium	0.00474283	11.816	0.000952499	0.975402	0.98745
291183|Lacinutrix	-0.00357264	6.54586	0.000115719	0.991425	0.991425
869806|Marivirga	-0.00417996	8.72297	0.000190866	0.988987	0.990361
200903|Paraliobacillus	-0.00451087	8.86157	0.000186876	0.989103	0.990361
2023|Thermoactinomyces	-0.00584196	9.69123	0.000470455	0.982711	0.98745
1843210|Anaerocolumna	-0.00676707	10.8321	0.000479642	0.982543	0.98745
332102|Fluviicola	-0.00745521	8.65287	0.000418892	0.983686	0.98745
1911573|Haloprofundus	-0.00833357	6.30135	0.000801795	0.977431	0.98745
76833|Actinobaculum	-0.0088904	9.45318	0.000833799	0.976985	0.98745
68|Lysobacter	-0.0128347	13.1634	0.00648387	0.935881	0.956543
1302410|Candidatus Annandia	-0.016127	6.983	0.0021264	0.963254	0.9807
1692042|Sulfurifustis	-0.0187862	9.66018	0.00968664	0.921671	0.946938
459532|Terribacillus	-0.0211073	8.63011	0.00311587	0.955526	0.974092
518753|Luteolibacter	-0.0234007	10.1617	0.0157465	0.900232	0.933729
1160973|Auritidibacter	-0.0236867	11.6374	0.00847736	0.926708	0.949634
157920|Cellulosimicrobium	-0.0304967	10.9107	0.0199176	0.887872	0.927962
1161127|Murdochiella	-0.0345748	8.47746	0.0107713	0.917416	0.9438
1647|Erysipelothrix	-0.0346968	10.0587	0.014917	0.902882	0.933729
289244|Xylanimicrobium	-0.0401951	8.71344	0.016217	0.898761	0.933729
1097466|Defluviimonas	-0.0447536	10.2973	0.0380298	0.845529	0.903523
447020|Adlercreutzia	-0.0457686	7.59757	0.0163578	0.898324	0.933729
96|Gallionella	-0.0466115	10.6124	0.0137573	0.906715	0.935559
2690160|Limihaloglobus	-0.0469079	7.49607	0.0252992	0.873742	0.919298
29574|Taylorella	-0.0521735	11.9919	0.022472	0.880949	0.924785
112987|Neochlamydia	-0.0524733	9.07075	0.0407988	0.840078	0.899512
86331|Mogibacterium	-0.0557969	9.55859	0.0324783	0.857116	0.907874
2005380|Mariniblastus	-0.0649059	8.29187	0.0424578	0.836903	0.897334
2093783|Methylomusa	-0.0656504	8.42972	0.0371476	0.847308	0.903523
85076|Marichromatium	-0.0659232	9.08152	0.0339645	0.853919	0.905707
256319|Chlorobaculum	-0.0671944	7.10136	0.0557387	0.81354	0.878266
1649470|Minicystis	-0.0674435	10.3481	0.0962671	0.756593	0.839829
2697|Heliobacterium	-0.0713295	7.42922	0.0566236	0.812093	0.878266
36853|Desulfitobacterium	-0.0716828	9.46343	0.0910348	0.763096	0.845854
2055880|Pseudescherichia	-0.0721433	6.63443	0.035947	0.849766	0.903738
234|Brucella	-0.0730389	10.2658	0.130138	0.718569	0.813315
45669|Salinicoccus	-0.0764672	12.7649	0.0433137	0.835291	0.896827
542837|Zindervirus	-0.0769638	4.37396	0.0191635	0.890001	0.928953
2675233|Metabacillus	-0.0782356	9.19574	0.0689387	0.793087	0.863291
219181|Ottowia	-0.0803947	12.0604	0.202587	0.652998	0.768176
50|Chondromyces	-0.080887	9.71072	0.114872	0.734925	0.826266
1802983|Candidatus Fokinia	-0.0819674	7.81519	0.115157	0.734609	0.826266
353799|Halostagnicola	-0.0847456	6.89579	0.0496841	0.823781	0.888103
67575|Rheinheimera	-0.0857117	13.157	0.146857	0.701856	0.801684
204619|Candidatus Nardonella	-0.0895561	8.10178	0.0758112	0.783265	0.859734
2478349|Indioceanicola	-0.0903438	9.96414	0.15752	0.691761	0.793512
1654741|Bombella	-0.0914986	10.5984	0.103223	0.748242	0.837018
1408194|Endomicrobium	-0.0957869	8.86984	0.164869	0.685032	0.78901
286104|Winogradskyella	-0.0960129	10.3448	0.0850905	0.770736	0.852952
332951|Halovivax	-0.0971253	7.15602	0.07378	0.786116	0.861615
84406|Virgibacillus	-0.10347	10.5793	0.11502	0.734761	0.826266
158876|Yokenella	-0.103481	7.06532	0.102798	0.748743	0.837018
2571159|Mycetohabitans	-0.104157	11.7604	0.0758624	0.783194	0.859734
141450|Oleiphilus	-0.104787	7.76198	0.100406	0.751586	0.838003
45667|Halobacillus	-0.10607	8.74649	0.0977654	0.754767	0.838986
146784|Bacteriovorax	-0.107822	9.98577	0.173789	0.677094	0.781339
2676060|Allopseudarcicella	-0.10973	11.0855	0.081831	0.775049	0.855035
2737|Vagococcus	-0.112171	10.2208	0.132535	0.7161	0.812787
1988031|Candidatus Promineofilum	-0.112445	10.584	0.17451	0.676464	0.781339
230666|Chitinibacter	-0.112746	9.85655	0.0717886	0.788953	0.862369
1521255|Candidatus Paracaedibacter	-0.115195	8.9134	0.174488	0.676483	0.781339
1826864|Candidatus Nitrosocosmicus	-0.115295	9.72833	0.137027	0.711542	0.81157
1649459|Hungatella	-0.11751	7.95266	0.103698	0.747683	0.837018
745410|Gallaecimonas	-0.121373	7.53917	0.158833	0.690546	0.793372
190323|Plantibacter	-0.123351	9.71411	0.286596	0.592847	0.719326
1623297|Stanholtvirus	-0.125102	4.4986	0.0658385	0.797689	0.865905
71666|Waddlia	-0.128859	7.74147	0.196454	0.65795	0.769368
1274351|Kroppenstedtia	-0.129253	9.31	0.243549	0.622052	0.742876
65047|Mitsuaria	-0.131555	10.3559	0.435768	0.50973	0.65427
2042066|Paraphotobacterium	-0.13326	5.81781	0.131911	0.71674	0.812787
1602345|Parasaccharibacter	-0.134336	6.82436	0.135689	0.712891	0.811932
2603324|Acidibrevibacterium	-0.13919	11.1921	0.281639	0.596061	0.720584
1518149|Thalassotalea	-0.142811	7.9668	0.178847	0.672699	0.779697
1825023|Candidatus Nitrosotenuis	-0.147066	6.76971	0.164078	0.685747	0.78901
458839|Actinotalea	-0.147143	11.4045	0.321545	0.571148	0.707857
327159|Candidatus Accumulibacter	-0.149514	9.347	0.286061	0.593192	0.719326
71|Simonsiella	-0.149598	8.21393	0.19836	0.656401	0.768732
2685905|Salicibibacter	-0.149957	10.2937	0.206381	0.649981	0.765771
254245|Aquicella	-0.154155	10.1471	0.185744	0.666824	0.776317
1804663|Haematospirillum	-0.155258	9.70569	0.36364	0.546993	0.687673
1780190|Izhakiella	-0.15533	7.37682	0.201191	0.654118	0.768344
40136|Oligotropha	-0.155877	10.3333	0.455741	0.500194	0.649641
990721|Christensenella	-0.156912	10.5909	0.30863	0.578978	0.713076
472568|Devriesea	-0.158955	7.73674	0.27405	0.601053	0.725505
762296|Methylovulum	-0.161021	8.25754	0.441053	0.507176	0.65327
898|Desulfomicrobium	-0.162235	8.73251	0.359905	0.549057	0.689168
1905344|Ruthenibacterium	-0.164659	10.3915	0.20682	0.649634	0.765771
466152|Singulisphaera	-0.166445	11.2008	0.339347	0.560688	0.697141
83770|Succinivibrio	-0.16651	9.66042	0.363865	0.54687	0.687673
2005363|Auricoccus	-0.16995	11.2674	0.335218	0.563081	0.698967
2077|Sporolactobacillus	-0.171571	8.31121	0.282042	0.595798	0.720584
1778601|Apibacter	-0.173104	9.11845	0.391708	0.531927	0.675204
367298|Phycicoccus	-0.173356	11.2839	0.66169	0.416674	0.581423
2173039|Arcticibacterium	-0.17534	7.33986	0.264878	0.607206	0.729574
2489367|Candidatus Cyclonatronum	-0.176723	12.8221	0.210185	0.646988	0.765683
116071|Micropruina	-0.178108	11.1996	0.70478	0.401918	0.571144
246875|Algoriphagus	-0.180719	9.85921	0.521059	0.47101	0.624048
1572860|Hartmannibacter	-0.182565	10.2164	0.601342	0.438739	0.6005
1137960|Allokutzneria	-0.183335	9.60941	0.382197	0.536946	0.679384
2237|Haloarcula	-0.183597	8.71867	0.309973	0.578154	0.713076
245876|Nitratireductor	-0.185842	9.57231	0.761517	0.383623	0.559645
45989|Methanoculleus	-0.186922	6.19781	0.255482	0.61365	0.733955
2316020|Mediterraneibacter	-0.187084	9.80004	0.292623	0.588986	0.717542
127|Isosphaera	-0.18876	10.084	0.292642	0.588975	0.717542
46238|Entomoplasma	-0.188814	6.52386	0.300495	0.584021	0.714813
1505663|Erysipelatoclostridium	-0.191422	8.26835	0.345052	0.557414	0.695793
225842|Formosa	-0.191847	9.62376	0.451636	0.502129	0.649641
745364|Luteipulveratus	-0.193733	9.44272	0.558096	0.455673	0.615107
338321|Turneriella	-0.195857	8.30288	0.587221	0.444159	0.605812
379068|Galbibacter	-0.204115	7.35791	0.339284	0.560725	0.697141
227388|Thermodesulfobium	-0.204351	8.43175	0.521254	0.470927	0.624048
55079|Aneurinibacillus	-0.205711	9.92651	0.437271	0.509002	0.65427
1706036|Gemmatirosa	-0.206649	12.1241	0.795393	0.373261	0.549078
2717089|Massilistercora	-0.206776	8.76999	0.302349	0.582864	0.714508
497726|Nitrososphaera	-0.206801	8.69688	0.450386	0.50272	0.649641
2038|Tropheryma	-0.208626	9.55322	0.748637	0.387669	0.561734
1582879|Ezakiella	-0.20876	9.20693	0.380003	0.538117	0.679772
162491|Oerskovia	-0.2094	9.09504	0.594298	0.44143	0.603135
2304692|Hungateiclostridium	-0.209571	9.3248	0.577127	0.448098	0.608022
59734|Empedobacter	-0.213033	10.902	0.582825	0.445868	0.606041
1193515|Snodgrassella	-0.215253	8.93665	0.451725	0.502087	0.649641
295595|Candidatus Hepatoplasma	-0.216745	9.17323	0.306133	0.580517	0.713854
1648508|Ciceribacter	-0.218703	7.83025	0.568304	0.451585	0.611699
141948|Thermomonas	-0.218941	11.3477	1.35494	0.245436	0.418998
939|Hydrogenobacter	-0.219369	9.48489	0.292709	0.588932	0.717542
741759|Tomitella	-0.220533	9.4229	0.847717	0.358014	0.532621
46239|Mesoplasma	-0.223943	6.82587	0.463956	0.49636	0.647819
282132|Candidatus Protochlamydia	-0.225226	9.85325	0.465513	0.495638	0.647819
2094023|Glaesserella	-0.22948	9.69275	0.547349	0.46004	0.61591
1525371|Neorhizobium	-0.230037	10.79	1.01261	0.315171	0.495659
810|Chlamydia	-0.233336	9.66176	0.663628	0.415993	0.581423
70774|Hydrogenophilus	-0.233848	12.0539	0.71207	0.399498	0.570608
336276|Olleya	-0.234541	7.35228	0.641284	0.423944	0.588438
1594166|Oricola	-0.234576	7.65815	0.552329	0.458008	0.615107
88723|Natrinema	-0.235141	8.54429	0.657121	0.418286	0.582483
1654931|Crenobacter	-0.235635	7.89085	0.71572	0.398294	0.570369
267408|Arsenicicoccus	-0.236735	10.8426	0.749296	0.387461	0.561734
232244|Belliella	-0.240791	7.85218	0.425698	0.514658	0.65646
2321115|Halarcobacter	-0.242319	6.64324	0.374734	0.540946	0.682251
167639|Ilyobacter	-0.245175	7.02741	0.526317	0.468782	0.623307
623276|Maritalea	-0.246364	8.36399	0.547027	0.460172	0.61591
46254|Oenococcus	-0.250232	8.85949	0.686949	0.40793	0.575342
1348508|Roseimicrobium	-0.251385	9.26306	0.853031	0.356514	0.532621
2735|Verrucomicrobium	-0.259392	10.9155	1.24242	0.265988	0.439775
154116|Georgenia	-0.260439	12.1872	1.32277	0.251104	0.424016
896|Desulfococcus	-0.262328	9.65133	1.18452	0.277399	0.452932
538|Eikenella	-0.262403	9.9733	0.742018	0.389773	0.562846
46352|Agrococcus	-0.262703	12.8166	1.89345	0.169944	0.328613
326319|Dokdonia	-0.264015	7.2164	0.714773	0.398606	0.570369
43773|Syntrophus	-0.264366	7.61141	0.930621	0.335557	0.514939
28884|Hydrogenovibrio	-0.264787	8.67984	0.432586	0.511278	0.65427
543311|Parvimonas	-0.265198	9.47926	0.655347	0.418914	0.582483
34008|Rhodovulum	-0.270954	9.86093	1.22954	0.268474	0.441104
1579315|Halocynthiibacter	-0.272775	8.58566	0.630195	0.427975	0.592986
1980513|Candidatus Nitrosoglobus	-0.273694	7.33088	0.601702	0.438602	0.6005
527198|Mariniflexile	-0.274698	6.4452	0.526117	0.468866	0.623307
2039240|Anaerotignum	-0.276193	10.0105	0.43365	0.51076	0.65427
34098|Blattabacterium	-0.277051	10.4076	1.45254	0.229167	0.399899
2078948|Epidermidibacterium	-0.278645	11.3591	0.849538	0.357499	0.532621
262|Francisella	-0.280408	11.1583	0.915756	0.33944	0.519727
1069494|Trueperella	-0.282639	9.6447	1.23871	0.2667	0.440027
86795|Marmoricola	-0.290215	10.9713	1.91437	0.167611	0.325703
1656823|Halanaeroarchaeum	-0.295859	5.55674	0.540542	0.462841	0.618431
392332|Geoalkalibacter	-0.29634	8.65538	0.884628	0.347771	0.526729
2679910|Intestinibaculum	-0.297586	8.30141	0.990216	0.320573	0.495659
28250|Ornithobacterium	-0.300627	9.30132	0.666611	0.414949	0.581423
1470540|Jeotgalibaca	-0.301284	11.9517	0.858071	0.355099	0.532621
39948|Dialister	-0.301438	9.76578	1.29367	0.256372	0.429055
1918540|Muribaculum	-0.303013	9.47911	0.664048	0.415846	0.581423
1331730|Chryseoglobus	-0.303759	9.2661	1.40709	0.236573	0.408951
76632|Thermobacillus	-0.304586	9.95759	0.723805	0.395646	0.570281
198251|Candidatus Pelagibacter	-0.305781	9.77334	0.99747	0.31881	0.495659
776|Coxiella	-0.306455	10.7961	0.857342	0.355303	0.532621
518733|Microterricola	-0.306478	9.48635	1.55524	0.213434	0.381472
43356|Kutzneria	-0.307158	9.34665	1.04642	0.30724	0.485538
178469|Arenibacter	-0.308028	6.94664	0.718338	0.397433	0.570369
117156|Actinopolymorpha	-0.312297	10.036	2.23164	0.136368	0.28595
72173|Citromicrobium	-0.313039	8.34525	1.31022	0.25336	0.425147
311181|Denitratisoma	-0.314687	10.9745	2.22464	0.136981	0.285953
280472|Aquiflexum	-0.314923	8.12882	0.679298	0.41055	0.578001
2675229|Peribacillus	-0.316058	9.21442	0.938457	0.333534	0.514689
320496|Neoasaia	-0.316915	6.67149	0.704384	0.40205	0.571144
1940138|Candidatus Walczuchella	-0.319364	6.99155	1.10569	0.293952	0.46925
1663717|Herbinix	-0.322866	8.82565	0.800788	0.371648	0.547728
293088|Martelella	-0.324178	9.80861	2.59499	0.10836	0.241159
743714|Orbus	-0.324519	6.93073	0.781296	0.377524	0.554313
2211641|Yoonia	-0.32596	10.3787	0.903874	0.342588	0.520495
1484898|Methyloceanibacter	-0.334522	8.56723	2.11318	0.147187	0.297015
171003|Caloranaerobacter	-0.33506	8.72009	0.992635	0.319983	0.495659
626119|Ruania	-0.337435	10.0151	2.12956	0.145634	0.296161
54066|Xylophilus	-0.338911	8.98239	1.77067	0.184412	0.34702
75309|Rhodanobacter	-0.33922	9.72718	1.63793	0.201698	0.364912
1930845|Ndongobacter	-0.339371	8.00686	1.00596	0.316763	0.495659
55968|Leucobacter	-0.341034	11.4711	3.22076	0.0738185	0.198956
1751872|Lacimicrobium	-0.34133	6.4019	0.822319	0.365304	0.540403
29331|Amphibacillus	-0.343126	9.25756	0.849558	0.357493	0.532621
261827|Algibacter	-0.344186	7.04043	1.08874	0.297675	0.474231
33886|Rathayibacter	-0.347677	11.4674	2.88997	0.090274	0.221996
1980514|Halodesulfurarchaeum	-0.349186	6.36106	0.714804	0.398595	0.570369
2420|Thermosipho	-0.350481	7.84115	1.39601	0.238423	0.410589
196082|Parascardovia	-0.350557	7.12513	1.10928	0.293172	0.468957
1652133|Halobacteriovorax	-0.350937	9.90799	1.64321	0.200975	0.364441
83614|Luteimonas	-0.353032	12.1687	2.80336	0.0952149	0.224354
125287|Ornithinimicrobium	-0.353807	13.8447	3.25753	0.0722003	0.196615
230494|Reinekea	-0.360844	8.20556	1.47598	0.225456	0.394359
60136|Sulfitobacter	-0.361835	10.0931	2.98111	0.0853753	0.218861
64159|Desulfurobacterium	-0.362252	6.4801	0.883678	0.348029	0.526729
289201|Pontibacillus	-0.363403	7.82077	0.912615	0.340269	0.519756
1511648|Defluviitoga	-0.363746	6.06916	1.12346	0.290112	0.466909
1287916|Euzebyella	-0.364835	5.87253	0.876352	0.350032	0.528743
261963|Kangiella	-0.367548	8.30623	1.68052	0.195952	0.359475
1073987|Halorientalis	-0.368738	7.32295	1.34396	0.247351	0.421354
69578|Cryobacterium	-0.369541	10.3933	3.42296	0.0653784	0.182457
285107|Thioclava	-0.370446	11.787	0.907474	0.34163	0.520044
1295327|Croceicoccus	-0.371216	9.54026	2.7603	0.0977806	0.227906
1434046|Sphingorhabdus	-0.372847	10.7321	4.64877	0.0319512	0.109329
2335|Thermotoga	-0.37318	7.19335	1.27303	0.260191	0.432005
33024|Phascolarctobacterium	-0.373417	9.3253	0.838566	0.360617	0.534474
225143|Oceanisphaera	-0.375298	9.21327	1.11712	0.291476	0.468147
323413|Dokdonella	-0.378107	8.94712	2.83416	0.0934245	0.224167
152161|Stappia	-0.379008	9.09487	2.14491	0.144197	0.293997
1926259|Pseudactinotalea	-0.380213	9.41281	2.66713	0.103596	0.234956
2239|Halobacterium	-0.388058	8.02758	1.51365	0.219644	0.388449
648802|Rummeliibacillus	-0.391454	7.46005	1.08596	0.298291	0.474253
984996|Mobilicoccus	-0.396092	10.1579	2.98273	0.0852907	0.218861
142577|Prauserella	-0.396364	9.92908	1.32528	0.250657	0.424016
2282740|Desulfallas	-0.401122	7.97597	1.20122	0.274046	0.448387
1988|Actinomadura	-0.403359	11.2415	4.31657	0.0386795	0.126004
189384|Candidatus Tremblaya	-0.403444	10.9617	1.00304	0.317465	0.495659
336809|Candidatus Sulcia	-0.403927	9.92086	1.67458	0.196742	0.360084
231683|Saccharospirillum	-0.403976	7.8005	1.15785	0.282865	0.459947
153497|Kozakia	-0.405949	7.16748	1.31081	0.253254	0.425147
2330|Halanaerobium	-0.409606	9.38483	2.20461	0.138755	0.287723
1434018|Lysinimonas	-0.411083	9.60259	2.94172	0.0874558	0.221996
380738|Candidatus Kuenenia	-0.411342	9.40278	0.996688	0.318999	0.495659
455076|Rhodocytophaga	-0.417502	10.6208	1.31995	0.251608	0.424016
1195526|Gryllotalpicola	-0.417546	9.42273	2.14491	0.144197	0.293997
2765402|Natrarchaeobaculum	-0.418615	8.18539	1.83826	0.176278	0.337545
2005386|Arabia	-0.420194	6.56991	1.59109	0.20825	0.373807
106591|Ensifer	-0.421343	9.83525	3.10262	0.0792884	0.207704
307628|Petrimonas	-0.423396	9.86769	1.58923	0.208515	0.373807
1107|Chloroflexus	-0.425232	10.5212	1.82127	0.178282	0.340554
354203|Yangia	-0.425707	8.88874	2.06045	0.152312	0.305507
235572|Candidatus Portiera	-0.431495	9.92547	1.55302	0.21376	0.381472
65496|Actinoalloteichus	-0.435678	10.7911	2.63127	0.105934	0.236847
318147|Paucibacter	-0.437621	10.5806	2.8913	0.0902002	0.221996
2132|Spiroplasma	-0.438358	9.21989	4.80423	0.0292364	0.104587
1075397|Halolamina	-0.439412	6.94002	1.40632	0.236702	0.408951
40544|Sutterella	-0.440081	12.9867	1.28071	0.258762	0.431453
33055|Candidatus Kinetoplastibacterium	-0.445204	10.398	1.69303	0.194301	0.357279
1849|Actinopolyspora	-0.447046	12.826	1.20714	0.27287	0.447394
59735|Bergeyella	-0.448394	9.87208	1.78221	0.182993	0.34702
436357|Thalassococcus	-0.45154	6.68499	1.4864	0.22383	0.393201
332246|Halalkalicoccus	-0.452552	8.50875	1.54638	0.214739	0.382353
1784836|Fermentimonas	-0.456147	9.95148	1.37697	0.241643	0.413927
57479|Microvirgula	-0.457542	8.66293	1.97551	0.161004	0.316775
1230698|Marisediminicola	-0.462458	8.72611	2.40486	0.12212	0.26579
74032|Antarctobacter	-0.462675	7.22887	1.71261	0.191749	0.354241
238749|Diaphorobacter	-0.462921	10.7809	5.12556	0.0243625	0.0930742
99479|Tetrasphaera	-0.463374	9.18328	3.72879	0.0545198	0.161913
33877|Agromyces	-0.465347	12.2017	7.20232	0.00772668	0.04165
947567|Litoreibacter	-0.466298	7.40796	2.01123	0.157281	0.311049
397864|Barnesiella	-0.472653	7.93471	1.73507	0.188872	0.351406
1649486|Rhizorhabdus	-0.489075	9.05466	4.72194	0.0306419	0.106217
744724|Halarchaeum	-0.498268	6.50608	1.95067	0.163651	0.319681
1763521|Paludisphaera	-0.498942	9.61068	3.15456	0.0768311	0.204277
1184606|Austwickia	-0.50156	9.76468	3.59767	0.0589184	0.171103
2078575|Psychromicrobium	-0.503917	9.00788	3.26665	0.0718051	0.196217
1911549|Raineyella	-0.504728	10.3599	2.82449	0.0939828	0.224167
1608298|Thiolapillus	-0.507026	8.40965	2.04695	0.153657	0.306782
447237|Frondihabitans	-0.508311	9.607	3.93832	0.048201	0.147032
1705353|Aurantimicrobium	-0.508622	10.7362	1.86253	0.173459	0.332957
453161|Candidatus Nitrotoga	-0.510497	9.39495	3.10054	0.0793882	0.207704
2126281|Mycolicibacillus	-0.520527	8.15951	2.88115	0.0907638	0.221996
40751|Thioploca	-0.528152	8.03198	2.65161	0.104601	0.236025
375928|Natranaerobius	-0.528334	7.30047	3.00408	0.0841865	0.218267
235888|Salinibacterium	-0.529813	10.1832	6.16271	0.0136498	0.0607523
875170|Celeribacter	-0.530012	11.471	2.72018	0.10024	0.228662
186831|Acetoanaerobium	-0.531377	8.11642	2.17061	0.141825	0.29189
294702|Proteiniphilum	-0.531966	9.36966	2.39874	0.122594	0.26579
398041|Flavisolibacter	-0.534844	13.0697	5.02285	0.0258205	0.0954026
1616789|Salinispira	-0.535218	7.23769	1.73504	0.188875	0.351406
387342|Halopiger	-0.537021	6.77008	1.76094	0.185618	0.34702
1778653|Sulfuriferula	-0.541267	9.61886	3.65563	0.0569289	0.167176
334107|Conchiformibius	-0.543754	6.35846	2.53242	0.112689	0.247037
257820|Kerstersia	-0.544753	8.14535	3.59075	0.0591609	0.171175
56106|Cylindrospermum	-0.547514	7.5787	1.47576	0.225491	0.394359
665568|Paraoerskovia	-0.547606	8.96575	3.09948	0.0794394	0.207704
74385|Gracilibacillus	-0.550931	7.40862	2.28057	0.132163	0.280732
49277|Psychroserpens	-0.5535	5.15711	1.64338	0.200953	0.364441
1915401|Roseitalea	-0.554914	8.36854	4.97856	0.0264772	0.0973717
511434|Candidatus Azobacteroides	-0.557283	8.58208	2.53692	0.112371	0.247028
367771|Marinovum	-0.558259	7.83817	2.50611	0.114566	0.250453
461|Fluoribacter	-0.558783	5.89469	1.96311	0.16232	0.318567
472825|Candidatus Purcelliella	-0.559977	7.53638	2.75387	0.0981703	0.227906
228398|Streptacidiphilus	-0.561524	9.70262	5.03372	0.025662	0.0954026
1565532|Rouxiella	-0.561653	7.85809	1.76399	0.185239	0.34702
1649463|Lentilitoribacter	-0.562513	6.98195	2.2027	0.138926	0.287723
390846|Echinicola	-0.56594	10.1512	2.89556	0.0899649	0.221996
72763|Tessaracoccus	-0.568094	13.2355	5.61188	0.0185368	0.0771394
1562|Desulfotomaculum	-0.571043	9.11362	3.50813	0.0621391	0.175281
1649|Kurthia	-0.572527	9.3118	2.1641	0.142421	0.29189
1621534|Paraglaciecola	-0.573365	9.54099	2.34147	0.127131	0.272621
83681|Nonomuraea	-0.574121	10.4195	7.51319	0.00653003	0.0367879
425|Methylosinus	-0.574926	9.054	6.27905	0.0128009	0.0585717
1091|Chlorobium	-0.575045	7.30328	3.55057	0.0605895	0.174011
57739|Vogesella	-0.575605	10.2664	2.70188	0.101383	0.230603
134813|Natronorubrum	-0.58358	6.75201	2.27847	0.13234	0.280732
1623298|Phietavirus	-0.583662	4.05641	1.66825	0.197587	0.360668
335927|Thalassobius	-0.58488	6.87116	2.07482	0.150896	0.303722
11646|Lentivirus	-0.585191	5.34189	0.855777	0.355742	0.532621
1055692|Chitinolyticbacter	-0.590585	9.92141	1.97711	0.160835	0.316775
187|Aquaspirillum	-0.590941	9.79321	2.81344	0.0946246	0.224354
1729679|Faecalibaculum	-0.596323	8.62904	2.75765	0.0979409	0.227906
1742992|Paenarthrobacter	-0.596482	7.05284	2.38976	0.123293	0.26657
1301080|Candidatus Nasuia	-0.59666	11.4338	2.88314	0.0906533	0.221996
1331737|Haloactinobacterium	-0.597722	10.5249	5.65726	0.0180729	0.076061
106146|Pelistega	-0.603221	11.4306	2.40197	0.122344	0.26579
2029|Kibdelosporangium	-0.604601	9.63661	4.65115	0.0319077	0.109329
1921784|Kiritimatiella	-0.605599	7.53332	3.75366	0.0537255	0.161382
864|Pectinatus	-0.610256	6.38289	2.57837	0.109491	0.24205
599651|Bermanella	-0.612107	9.21838	1.88012	0.171449	0.330712
158481|Hahella	-0.614284	8.39555	3.60584	0.0586334	0.170906
56358|Sandaracinobacter	-0.614901	9.80441	8.41511	0.0040248	0.0257521
28236|Petrotoga	-0.615853	5.48053	2.12189	0.146359	0.29639
401618|Candidatus Riesia	-0.616422	8.81889	2.24171	0.13549	0.285108
73778|Methylocaldum	-0.616941	8.05002	4.28979	0.0392833	0.126004
39773|Methylomicrobium	-0.618564	8.63378	6.00437	0.0148997	0.0654247
82980|Leminorella	-0.619601	5.79626	2.75555	0.0980681	0.227906
2220|Methanolobus	-0.621967	4.50615	1.50342	0.221204	0.389458
76634|Mycetocola	-0.624662	10.6817	4.58158	0.0332054	0.113128
44258|Caloramator	-0.626372	8.82859	2.88501	0.0905494	0.221996
90243|Oligella	-0.626598	11.4276	2.58098	0.109313	0.24205
1331051|Candidatus Saccharimonas	-0.628946	9.93572	4.75502	0.0300686	0.106013
2251|Haloferax	-0.634935	7.25773	3.22711	0.0735362	0.198876
1073531|Mycolicibacter	-0.637874	9.59072	5.25188	0.0226863	0.0888264
265488|Rhodopirellula	-0.63795	7.12142	2.6506	0.104667	0.236025
156973|Dysgonomonas	-0.641307	10.4164	3.16389	0.0763989	0.203817
1862|Dermatophilus	-0.648946	9.78441	6.21337	0.0132732	0.0600346
1897649|Pistricoccus	-0.652233	8.44925	3.1999	0.0747536	0.200789
346096|Paludibacter	-0.654275	10.2773	3.10857	0.0790023	0.207704
221065|Kordia	-0.655281	9.75382	3.5139	0.0619261	0.175281
82982|Obesumbacterium	-0.657986	5.46708	2.88683	0.0904483	0.221996
2071|Saccharothrix	-0.65816	10.4841	5.13723	0.0242023	0.0929133
241192|Thermodesulfatator	-0.661442	6.36283	3.2899	0.0708074	0.195342
1184396|Mesotoga	-0.664708	7.04879	4.06613	0.0447325	0.1386
574697|Butyricimonas	-0.668585	7.97095	3.25012	0.0725231	0.196813
1217416|Halioglobus	-0.67037	8.21355	5.42265	0.020609	0.0827515
1936111|Fuerstia	-0.674069	8.33086	4.28421	0.0394106	0.126004
1935188|Libanicoccus	-0.677718	6.16418	2.8046	0.0951418	0.224354
160795|Ureibacillus	-0.684811	8.28528	2.75583	0.0980513	0.227906
1344552|Noviherbaspirillum	-0.687474	10.363	5.57401	0.0189335	0.0776076
1714270|Gammasphaerolipovirus	-0.689067	3.84153	8.99456	0.0756287	0.202448
263377|Salipiger	-0.698917	7.94243	3.99759	0.0465585	0.143131
48073|Microbulbifer	-0.700998	9.9358	6.88641	0.00917539	0.0468898
119541|Rhodobaca	-0.704582	9.27	4.49262	0.0349459	0.117532
10358|Cytomegalovirus	-0.706051	4.71476	1.87614	0.171902	0.330774
349742|Sedimenticola	-0.708563	7.39679	4.57277	0.0333736	0.113211
1433997|Diaminobutyricimonas	-0.709204	8.98665	7.04974	0.00839446	0.0437513
1611681|Mucinivorans	-0.710974	9.67578	3.87438	0.0500422	0.151474
1653174|Actinotignum	-0.713886	8.28712	5.27785	0.0223568	0.0883859
1434019|Mameliella	-0.715469	7.91498	4.03272	0.0456129	0.140774
171163|Halosimplex	-0.716013	7.48927	4.40331	0.0367901	0.122686
1573534|Faecalitalea	-0.721297	9.43613	3.51619	0.0618418	0.175281
96492|Frigoribacterium	-0.725691	9.91451	6.3695	0.0121788	0.056693
44474|Pleurocapsa	-0.72628	9.74037	2.17137	0.141756	0.29189
63742|Natrialba	-0.728142	5.66913	3.12964	0.0779996	0.206686
2370|Xylella	-0.731744	9.38985	6.74394	0.00991767	0.0492056
490567|Arenimonas	-0.743572	10.2496	7.50917	0.00654423	0.0367879
32014|Iodobacter	-0.745194	6.93673	3.54462	0.0608045	0.174011
428711|Jonquetella	-0.746862	6.62915	4.79355	0.029415	0.104749
152267|Pigmentiphaga	-0.749061	11.5051	6.24721	0.0130277	0.0592647
1676142|Wenzhouxiangella	-0.752783	8.89774	4.28573	0.0393758	0.126004
907364|Phytohabitans	-0.754505	9.88614	11.2941	0.000888759	0.0080397
651456|Kosmotoga	-0.768838	6.78836	6.1204	0.0139728	0.0617786
140458|Thermacetogenium	-0.769587	8.29557	4.37153	0.0374708	0.124086
2689587|Suicoccus	-0.770808	11.9682	3.43138	0.0650504	0.182187
1644057|Salinigranum	-0.773252	7.06676	3.76633	0.0533257	0.160794
203193|Halobiforma	-0.773796	6.34617	3.6151	0.0583122	0.170601
2207|Methanosarcina	-0.774852	8.05482	5.72314	0.0174208	0.0745116
168808|Sneathia	-0.778247	7.05373	5.23796	0.0228649	0.0890826
400947|Deefgea	-0.780358	7.46351	3.67685	0.0562188	0.165709
1921582|Orrella	-0.784006	8.05446	7.79042	0.00562381	0.0330294
204476|Labrys	-0.787241	10.9224	7.79386	0.00561344	0.0330294
529883|Rhodoluna	-0.788729	12.437	8.31696	0.00424123	0.0269181
2529408|Schaalia	-0.791879	12.643	9.17491	0.00268905	0.019239
227873|Pannonibacter	-0.799842	9.24463	7.62063	0.00616223	0.0356594
82976|Buttiauxella	-0.808986	6.52611	4.22141	0.0408708	0.128209
1101|Prosthecochloris	-0.810366	7.28887	6.7777	0.00973633	0.0488057
293431|Haloquadratum	-0.81873	5.76121	2.90622	0.0893786	0.221996
281472|Jiangella	-0.822643	10.5925	8.90089	0.00310869	0.0216508
946234|Flavonifractor	-0.832551	9.86656	4.26668	0.0398124	0.126004
28228|Colwellia	-0.836357	9.33464	5.52291	0.0194827	0.0790356
169133|Citricoccus	-0.837793	13.6555	10.7153	0.00119976	0.0103759
577309|Paraprevotella	-0.847749	9.12462	5.34402	0.0215397	0.0860493
1542963|Halapricum	-0.855732	5.96437	4.2867	0.0393537	0.126004
499228|Tepidanaerobacter	-0.865333	7.4404	7.08377	0.00824056	0.0432355
196081|Scardovia	-0.889462	6.71723	4.55485	0.0337185	0.11389
1607807|Candidatus Methanoplasma	-0.898382	5.7725	2.9384	0.0876339	0.221996
1283313|Alloprevotella	-0.899766	11.8305	4.84441	0.0285748	0.103158
1961799|Lacunisphaera	-0.91256	8.24942	8.92496	0.00306929	0.0215672
57665|Sulfurospirillum	-0.916908	9.1059	8.24474	0.00440804	0.0275328
444459|Flagellimonas	-0.916983	5.87171	6.39787	0.0119902	0.0561682
34093|Simkania	-0.91878	8.15756	6.78063	0.00972079	0.0488057
204286|Cobetia	-0.920383	7.53957	8.02131	0.00496806	0.0301071
54304|Planktothrix	-0.938883	11.6019	4.26433	0.0398667	0.126004
2422|Fervidobacterium	-0.940559	8.56707	4.4109	0.0366295	0.12267
390805|Geosporobacter	-0.944881	7.7143	5.26955	0.0224615	0.0883859
2678343|Halalkaliarchaeum	-0.945785	5.84994	4.95129	0.0268901	0.0979748
1676651|Limnochorda	-0.95077	9.20783	8.07369	0.00483054	0.0297003
2035811|Pseudodesulfovibrio	-0.961366	8.98197	9.66443	0.00207771	0.0162437
51514|Dehalobacterium	-0.962049	7.21834	6.58794	0.0108018	0.0524756
292635|Laceyella	-0.970889	8.96419	7.52673	0.00648247	0.0367879
596707|Sinomonas	-0.979762	12.3656	12.2144	0.000553368	0.00565585
644652|Gordonibacter	-0.980419	8.11403	9.47316	0.00229762	0.0176819
1392389|Intestinimonas	-0.989042	4.36945	4.27789	0.093644	0.224167
1779136|Bradymonas	-0.990704	7.82131	7.25929	0.00749163	0.0406614
286130|Sulfuricurvum	-0.994156	8.61987	5.17085	0.0237472	0.0916314
347533|Zobellella	-1.00823	7.47421	6.95127	0.00885668	0.0458566
194195|Alysiella	-1.01068	8.02961	6.73961	0.00994115	0.0492056
231454|Dyella	-1.01231	9.89898	13.0969	0.000352516	0.00374905
843|Wolinella	-1.01811	5.55829	6.1609	0.0136635	0.0607523
267849|Nitrincola	-1.03527	7.34283	6.39982	0.0119773	0.0561682
2019482|Brevefilum	-1.03967	10.5971	8.74686	0.00337342	0.0226913
83551|Parachlamydia	-1.04055	9.2329	8.01938	0.00497322	0.0301071
28209|Chelatococcus	-1.0502	10.4311	23.5928	2.0101e-06	5.10307e-05
67572|Psychromonas	-1.06439	9.2114	5.53596	0.0193409	0.0788668
1649453|Gimesia	-1.10156	4.86363	5.82978	0.0164163	0.0709872
1541445|Candidatus Phaeomarinobacter	-1.10312	7.64808	9.41082	0.00237433	0.0179507
1720323|Lessievirus	-1.11041	3.96367	7.59339	0.0426108	0.133074
34102|Sphaerotilus	-1.13091	12.2471	14.9346	0.00013919	0.00188867
1682492|Candidatus Tachikawaea	-1.14801	6.32881	7.13711	0.00800514	0.0428559
41201|Ewingella	-1.16027	7.15644	8.67792	0.00349927	0.0233383
1073986|Halobellus	-1.16206	6.56289	8.85025	0.0031933	0.022045
2276|Pyrobaculum	-1.19335	7.14805	8.25039	0.00439476	0.0275328
1434010|Jatrophihabitans	-1.1938	7.43211	9.80073	0.00193421	0.015376
1623304|Moineauvirus	-1.19801	3.9586	8.22229	0.0176706	0.0751715
288793|Salinimonas	-1.20624	6.83769	11.0193	0.00102464	0.00905397
138|Borrelia	-1.20688	9.01055	9.34089	0.00246348	0.0181192
44471|Microcoleus	-1.21052	13.1126	6.53496	0.0111203	0.0533031
292486|Avibacterium	-1.21871	7.00173	15.0393	0.000132065	0.00182342
258255|Pseudovibrio	-1.22296	8.8412	8.22125	0.00446375	0.0276612
1912217|Pseudopropionibacterium	-1.24053	11.3631	13.9266	0.00023137	0.00267776
508459|Cloacibacillus	-1.25092	7.98765	8.64081	0.00356899	0.0234066
53945|Octadecabacter	-1.25103	8.62853	16.0433	7.99185e-05	0.00120954
12141|Tombusvirus	-1.28041	4.0273	8.24302	0.0188653	0.0776076
444051|Mesoflavibacter	-1.28639	6.93463	6.52596	0.0111754	0.0533031
1204360|Siansivirga	-1.29254	6.61302	10.2628	0.00151871	0.0121962
748770|Dolichospermum	-1.30305	10.0292	6.67478	0.0103001	0.0506635
44000|Caldicellulosiruptor	-1.33134	9.55899	12.2777	0.00053569	0.00554721
91914|Asaia	-1.34406	8.11533	10.2873	0.00149939	0.0121652
2202|Methanospirillum	-1.35584	6.24009	6.90398	0.00908791	0.0467463
48075|Marinobacterium	-1.37117	8.0151	21.5869	5.27054e-06	0.000121998
1906945|Parageobacillus	-1.3725	10.4659	10.3417	0.00145745	0.011948
1941236|Gemykibivirus	-1.3794	4.6559	3.73875	0.0542002	0.161913
2321113|Pseudoarcobacter	-1.38831	7.24926	9.36419	0.00243341	0.0180669
370735|Zhihengliuella	-1.3888	7.57138	11.7527	0.000701526	0.00681606
376170|Haloplanus	-1.41294	7.70337	14.0679	0.000215405	0.00260806
568|Hafnia	-1.42487	6.1913	10.9991	0.0010354	0.00905397
1623278|Bronvirus	-1.4559	3.91569	15.9455	0.00262919	0.0189832
1218|Prochlorococcus	-1.45802	11.4243	9.25397	0.00257909	0.0187939
2160|Methanobacterium	-1.46589	8.02894	11.3328	0.00087116	0.0080397
121871|Haloterrigena	-1.49367	11.0642	8.43512	0.00398207	0.0256876
99|Ancylobacter	-1.5001	9.94259	21.6125	5.20565e-06	0.000121998
305899|Endozoicomonas	-1.57765	9.10175	17.2424	4.40548e-05	0.000787979
630749|Spongiibacter	-1.59988	8.50415	10.5458	0.00131034	0.0110886
1508657|Ruminiclostridium	-1.62668	6.279	11.773	0.000694231	0.00681606
60846|Halogeometricum	-1.64782	6.07711	14.5867	0.000165804	0.00213914
359336|Castellaniella	-1.69687	9.93404	25.0935	9.83317e-07	2.86619e-05
2222|Methanothrix	-1.74101	9.3026	11.8189	0.00067801	0.00675435
1055323|Aeribacillus	-1.76181	11.2502	13.1372	0.000345358	0.00372324
393005|Tamlana	-1.7888	5.46313	13.5331	0.000282408	0.00308688
673534|Plantactinospora	-1.87819	11.4363	15.4326	0.000108432	0.0015803
465|Tatlockia	-1.96962	7.53147	18.4487	2.4303e-05	0.000490422
2321111|Aliiarcobacter	-2.17139	6.99201	12.5258	0.000471787	0.00495062
157226|Jeotgalibacillus	-2.25329	13.6715	9.00906	0.00293557	0.0208134
1291539|Candidatus Methanomethylophilus	-2.32282	6.17938	20.3262	9.70868e-06	0.000212242
64895|Borreliella	-2.37193	8.35922	26.9632	4.06322e-07	1.3324e-05
1205|Trichodesmium	-2.38352	11.9123	13.9508	0.000228545	0.00267776
18|Pelobacter	-2.38771	11.329	36.3205	5.41817e-09	2.50829e-07
1193324|Alkalitalea	-2.50965	10.3427	18.8998	1.94776e-05	0.000403392
2732977|Citexvirus	-2.60622	4.14476	18.7711	6.35905e-05	0.00108795
202746|Sulfurimonas	-2.99086	10.6717	26.7484	4.49585e-07	1.41529e-05
140052|Betaretrovirus	-3.11589	11.4781	16.3834	6.74663e-05	0.0011297
885864|Jeongeupia	-3.44923	11.2428	37.7029	2.90282e-09	1.42782e-07
2035712|Guyparkeria	-3.99398	11.4042	44.7191	1.28473e-10	8.42571e-09
10375|Lymphocryptovirus	-5.64237	6.35677	29.6026	1.18167e-07	4.64987e-06
687333|Gammatorquevirus	-8.09727	9.23805	43.258	2.44281e-10	1.47884e-08
40272|Roseolovirus	-8.35465	9.56888	42.5006	3.41315e-10	1.91868e-08
687331|Alphatorquevirus	-8.51074	13.6566	49.0032	1.99014e-11	1.74026e-09
687332|Betatorquevirus	-9.41694	10.6043	49.8736	1.36715e-11	1.53706e-09
10405|Orthohepadnavirus	-14.1773	16.1641	57.7545	4.79944e-13	6.29526e-11

## Sheet: human stomach OvR
gene id	logFC	logCPM	F	PValue	FDR
ENSG00000283706.1|mRNA|PRSS50|ENSG00000283706.1|ENSG00000283706.1|0|1372	2.93632	2.50198	84.8433	8.55996e-18	1.70728e-13
ENSG00000206549.13|mRNA|PRSS50|ENSG00000206549.13|ENSG00000206549.13|0|2960	2.91395	2.51237	82.8281	1.86958e-17	1.86444e-13
hsa_circ_0060996|circRNA|hsa_circ_0060996|hsa_circ_0060996|hsa_circ_0060996|0|600	2.14162	1.96393	60.2094	1.67728e-13	1.11511e-09
ENSG00000269028.3|mRNA|MTRNR2L12|ENSG00000269028.3|ENSG00000269028.3|0|1049	2.12542	4.22068	53.0979	3.36473e-12	1.34219e-08
hsa_circ_0014677|circRNA|hsa_circ_0014677|hsa_circ_0014677|hsa_circ_0014677|0|442	2.01313	1.12768	34.8084	1.06593e-08	3.63285e-06
hsa_circ_0063153|circRNA|hsa_circ_0063153|hsa_circ_0063153|hsa_circ_0063153|0|600	1.88428	3.13832	51.6692	6.1991e-12	2.06069e-08
hsa_circ_0007940|circRNA|hsa_circ_0007940|hsa_circ_0007940|hsa_circ_0007940|0|566	1.69855	1.51099	27.6472	2.92726e-07	2.61812e-05
hsa_circ_0071844|circRNA|hsa_circ_0071844|hsa_circ_0071844|hsa_circ_0071844|0|600	1.67426	2.095	37.972	2.54234e-09	2.11279e-06
hsa_circ_0059056|circRNA|hsa_circ_0059056|hsa_circ_0059056|hsa_circ_0059056|0|422	1.64192	0.934367	28.181	2.27876e-07	2.17464e-05
hsa_circ_0000246|circRNA|hsa_circ_0000246|hsa_circ_0000246|hsa_circ_0000246|0|600	1.58226	4.78299	56.1608	9.16789e-13	4.57134e-09
hsa_circ_0060997|circRNA|hsa_circ_0060997|hsa_circ_0060997|hsa_circ_0060997|0|552	1.52869	1.99696	30.877	6.48996e-08	1.01366e-05
hsa_circ_0027612|circRNA|hsa_circ_0027612|hsa_circ_0027612|hsa_circ_0027612|0|378	1.51439	2.63466	39.3801	1.35074e-09	1.58473e-06
hsa_circ_0067074|circRNA|hsa_circ_0067074|hsa_circ_0067074|hsa_circ_0067074|0|600	1.50337	1.13193	24.3411	1.39912e-06	6.33376e-05
ENSG00000239899.3|srpRNA|RN7SL674P|ENSG00000239899.3|ENSG00000239899.3|0|275	1.48183	3.22933	20.3662	9.48638e-06	0.000212936
hsa_circ_0032323|circRNA|hsa_circ_0032323|hsa_circ_0032323|hsa_circ_0032323|0|600	1.47635	1.00865	25.1266	9.62718e-07	5.1761e-05
hsa_circ_0074639|circRNA|hsa_circ_0074639|hsa_circ_0074639|hsa_circ_0074639|0|596	1.47472	2.7905	28.8819	1.64168e-07	1.74613e-05
hsa_circ_0081349|circRNA|hsa_circ_0081349|hsa_circ_0081349|hsa_circ_0081349|0|564	1.45425	1.32948	23.366	2.22975e-06	8.51963e-05
ENSG00000255823.4|mRNA|MTRNR2L8|ENSG00000255823.4|ENSG00000255823.4|0|1303	1.4525	6.46921	27.1029	3.78098e-07	2.99344e-05
hsa_circ_0001949|circRNA|hsa_circ_0001949|hsa_circ_0001949|hsa_circ_0001949|0|438	1.44566	1.81678	22.3378	3.65362e-06	0.000117345
hsa_circ_0049860|circRNA|hsa_circ_0049860|hsa_circ_0049860|hsa_circ_0049860|0|600	1.44131	4.66213	47.2096	4.25724e-11	1.21301e-07
ENSG00000188219.14|mRNA|POTEE|ENSG00000188219.14|ENSG00000188219.14|0|4192	1.43503	2.02861	35.7958	6.80141e-09	3.01454e-06
hsa_circ_0061389|circRNA|hsa_circ_0061389|hsa_circ_0061389|hsa_circ_0061389|0|356	1.4278	3.22495	24.2234	1.47995e-06	6.50782e-05
ENSG00000222038.3|mRNA|POTEJ|ENSG00000222038.3|ENSG00000222038.3|0|3383	1.36505	1.86899	30.9724	6.20968e-08	9.92748e-06
ENSG00000213931.5|mRNA|HBE1|ENSG00000213931.5|ENSG00000213931.5|0|928	1.35037	2.61785	22.566	3.27372e-06	0.000109923
ENSG00000229604.2|pseudogene|MTATP8P2|ENSG00000229604.2|ENSG00000229604.2|0|202	1.34732	2.55306	22.8217	2.89504e-06	0.000101837
ENSG00000226510.1|lncRNA|UPK1A-AS1|ENSG00000226510.1|ENSG00000226510.1|0|795	1.34401	2.00274	23.627	1.9679e-06	7.88149e-05
hsa_circ_0062273|circRNA|hsa_circ_0062273|hsa_circ_0062273|hsa_circ_0062273|0|600	1.33039	1.21206	23.5687	2.02355e-06	8.03978e-05
hsa_circ_0070064|circRNA|hsa_circ_0070064|hsa_circ_0070064|hsa_circ_0070064|0|532	1.32395	0.909146	18.7262	2.11399e-05	0.000352833
hsa_circ_0019296|circRNA|hsa_circ_0019296|hsa_circ_0019296|hsa_circ_0019296|0|600	1.3101	1.23597	26.3097	5.49631e-07	3.75424e-05
hsa_circ_0004024|circRNA|hsa_circ_0004024|hsa_circ_0004024|hsa_circ_0004024|0|600	1.30223	2.15408	34.3311	1.32525e-08	3.98431e-06
hsa_circ_0091024|circRNA|hsa_circ_0091024|hsa_circ_0091024|hsa_circ_0091024|0|600	1.29978	1.44116	35.9986	6.20338e-09	2.82591e-06
hsa_circ_0032248|circRNA|hsa_circ_0032248|hsa_circ_0032248|hsa_circ_0032248|0|600	1.29358	0.755567	23.4782	2.11315e-06	8.25531e-05
ENSG00000113361.12|mRNA|CDH6|ENSG00000113361.12|ENSG00000113361.12|0|12379	1.28955	2.28187	16.9833	4.99523e-05	0.000625031
hsa_circ_0079855|circRNA|hsa_circ_0079855|hsa_circ_0079855|hsa_circ_0079855|0|600	1.28453	1.2683	23.3285	2.27024e-06	8.55955e-05
ENSG00000265735.2|srpRNA|RN7SL5P|ENSG00000265735.2|ENSG00000265735.2|0|321	1.26442	2.62113	19.9779	1.14608e-05	0.000241951
hsa_circ_0028078|circRNA|hsa_circ_0028078|hsa_circ_0028078|hsa_circ_0028078|0|364	1.25314	1.38732	20.9318	7.20747e-06	0.000182196
hsa_circ_0049290|circRNA|hsa_circ_0049290|hsa_circ_0049290|hsa_circ_0049290|0|600	1.24218	0.834687	21.8345	4.65688e-06	0.000135288
ENSG00000154620.5|mRNA|TMSB4Y|ENSG00000154620.5|ENSG00000154620.5|0|1669	1.23971	4.37782	13.3125	0.000315359	0.00230481
ENSG00000180914.10|mRNA|OXTR|ENSG00000180914.10|ENSG00000180914.10|0|4514	1.23956	2.33507	24.537	1.27445e-06	5.996e-05
ENSG00000162496.8|mRNA|DHRS3|ENSG00000162496.8|ENSG00000162496.8|0|3036	1.23892	5.69249	46.4088	6.03619e-11	1.5049e-07
hsa_circ_0034516|circRNA|hsa_circ_0034516|hsa_circ_0034516|hsa_circ_0034516|0|536	1.22718	3.80554	23.3334	2.26483e-06	8.55955e-05
ENSG00000255007.1|lncRNA|LINC02489|ENSG00000255007.1|ENSG00000255007.1|0|354	1.22437	2.99455	18.9689	1.87676e-05	0.000327775
hsa_circ_0036252|circRNA|hsa_circ_0036252|hsa_circ_0036252|hsa_circ_0036252|0|534	1.22002	1.38034	19.4629	1.47362e-05	0.000282949
hsa_circ_0055052|circRNA|hsa_circ_0055052|hsa_circ_0055052|hsa_circ_0055052|0|600	1.21635	1.09247	22.4636	3.43902e-06	0.000113562
hsa_circ_0057281|circRNA|hsa_circ_0057281|hsa_circ_0057281|hsa_circ_0057281|0|600	1.21425	1.33666	22.4412	3.47618e-06	0.000114034
hsa_circ_0002366|circRNA|hsa_circ_0002366|hsa_circ_0002366|hsa_circ_0002366|0|452	1.21411	3.56684	23.1008	2.53209e-06	9.14899e-05
hsa_circ_0074643|circRNA|hsa_circ_0074643|hsa_circ_0074643|hsa_circ_0074643|0|600	1.21137	2.29448	20.3848	9.40084e-06	0.000212104
ENSG00000258791.7|lncRNA|LINC00520|ENSG00000258791.7|ENSG00000258791.7|0|2462	1.20541	2.33669	21.2257	6.25085e-06	0.000164285
hsa_circ_0065648|circRNA|hsa_circ_0065648|hsa_circ_0065648|hsa_circ_0065648|0|242	1.19419	0.901275	19.893	7.2264e-05	0.000816335
hsa_circ_0032135|circRNA|hsa_circ_0032135|hsa_circ_0032135|hsa_circ_0032135|0|600	1.19115	0.97072	22.7639	2.97663e-06	0.00010343
hsa_circ_0032321|circRNA|hsa_circ_0032321|hsa_circ_0032321|hsa_circ_0032321|0|600	1.18136	0.952331	15.1812	0.000122722	0.00120075
ENSG00000108679.12|mRNA|LGALS3BP|ENSG00000108679.12|ENSG00000108679.12|0|3584	1.17473	2.41225	19.5279	1.4276e-05	0.00027779
hsa_circ_0023342|circRNA|hsa_circ_0023342|hsa_circ_0023342|hsa_circ_0023342|0|550	1.17424	2.70657	24.3853	1.37001e-06	6.26716e-05
hsa_circ_0004299|circRNA|hsa_circ_0004299|hsa_circ_0004299|hsa_circ_0004299|0|600	1.17262	2.27834	22.2099	3.88574e-06	0.000120343
hsa_circ_0080858|circRNA|hsa_circ_0080858|hsa_circ_0080858|hsa_circ_0080858|0|600	1.16304	1.23753	18.6379	2.20773e-05	0.000362342
ENSG00000158406.4|mRNA|HIST1H4H|ENSG00000158406.4|ENSG00000158406.4|0|2163	1.15282	5.1955	19.3526	1.55531e-05	0.000290321
hsa_circ_0046151|circRNA|hsa_circ_0046151|hsa_circ_0046151|hsa_circ_0046151|0|600	1.14976	2.72419	18.156	2.79813e-05	0.000425696
hsa_circ_0021274|circRNA|hsa_circ_0021274|hsa_circ_0021274|hsa_circ_0021274|0|600	1.14949	1.07124	22.5225	3.34293e-06	0.00011131
ENSG00000184792.15|mRNA|OSBP2|ENSG00000184792.15|ENSG00000184792.15|0|6700	1.14707	7.3458	27.0231	3.92576e-07	3.04504e-05
hsa_circ_0081338|circRNA|hsa_circ_0081338|hsa_circ_0081338|hsa_circ_0081338|0|364	1.14621	1.31867	15.306	0.000115274	0.0011467
hsa_circ_0088339|circRNA|hsa_circ_0088339|hsa_circ_0088339|hsa_circ_0088339|0|600	1.14546	0.814076	13.5024	0.000286345	0.00215515
hsa_circ_0023920|circRNA|hsa_circ_0023920|hsa_circ_0023920|hsa_circ_0023920|0|600	1.14322	1.08353	20.2333	1.01199e-05	0.000222293
hsa_circ_0070808|circRNA|hsa_circ_0070808|hsa_circ_0070808|hsa_circ_0070808|0|504	1.13796	2.01198	18.4502	2.42098e-05	0.000384583
ENSG00000255002.1|lncRNA|LINC02324|ENSG00000255002.1|ENSG00000255002.1|0|1442	1.13781	3.05716	13.1577	0.000341195	0.00242521
hsa_circ_0034102|circRNA|hsa_circ_0034102|hsa_circ_0034102|hsa_circ_0034102|0|494	1.12804	1.03371	16.7858	5.50957e-05	0.00066974
hsa_circ_0032314|circRNA|hsa_circ_0032314|hsa_circ_0032314|hsa_circ_0032314|0|600	1.12614	2.86132	21.5422	5.36332e-06	0.000148985
hsa_circ_0079660|circRNA|hsa_circ_0079660|hsa_circ_0079660|hsa_circ_0079660|0|324	1.12503	1.2619	18.4925	2.37113e-05	0.000379707
ENSG00000275882.1|pseudogene|IKBKGP1|ENSG00000275882.1|ENSG00000275882.1|0|1073	1.12314	4.8461	29.6063	1.17098e-07	1.40695e-05
ENSG00000185909.14|mRNA|KLHDC8B|ENSG00000185909.14|ENSG00000185909.14|0|2158	1.11828	3.01125	24.729	1.16307e-06	5.6405e-05
hsa_circ_0075436|circRNA|hsa_circ_0075436|hsa_circ_0075436|hsa_circ_0075436|0|600	1.11583	1.44027	22.8004	2.92488e-06	0.000102525
ENSG00000231437.3|lncRNA|LINC01750|ENSG00000231437.3|ENSG00000231437.3|0|3590	1.11057	2.17904	19.5607	1.40484e-05	0.000275054
hsa_circ_0073611|circRNA|hsa_circ_0073611|hsa_circ_0073611|hsa_circ_0073611|0|600	1.1103	0.960246	16.9001	5.20575e-05	0.000643699
ENSG00000178184.15|mRNA|PARD6G|ENSG00000178184.15|ENSG00000178184.15|0|4224	1.10872	1.71681	21.9129	4.48397e-06	0.00013269
ENSG00000234456.7|lncRNA|MAGI2-AS3|ENSG00000234456.7|ENSG00000234456.7|0|11625	1.10796	7.18791	14.8654	0.000143814	0.00133442
hsa_circ_0003029|circRNA|hsa_circ_0003029|hsa_circ_0003029|hsa_circ_0003029|0|600	1.10684	3.06854	23.8691	1.75272e-06	7.2527e-05
ENSG00000124657.1|mRNA|OR2B6|ENSG00000124657.1|ENSG00000124657.1|0|942	1.10614	4.00956	17.3678	4.12879e-05	0.000551196
hsa_circ_0003835|circRNA|hsa_circ_0003835|hsa_circ_0003835|hsa_circ_0003835|0|266	1.10405	0.903978	14.84	0.000145664	0.0013422
ENSG00000131095.12|mRNA|GFAP|ENSG00000131095.12|ENSG00000131095.12|0|12110	1.10097	1.83864	17.2062	4.47269e-05	0.000582296
hsa_circ_0007277|circRNA|hsa_circ_0007277|hsa_circ_0007277|hsa_circ_0007277|0|600	1.0968	1.81145	21.3717	5.82425e-06	0.000156556
hsa_circ_0026236|circRNA|hsa_circ_0026236|hsa_circ_0026236|hsa_circ_0026236|0|600	1.09638	1.3378	17.4107	4.04212e-05	0.000545117
hsa_circ_0012826|circRNA|hsa_circ_0012826|hsa_circ_0012826|hsa_circ_0012826|0|600	1.09357	1.48388	19.8636	1.21177e-05	0.000250333
ENSG00000273729.1|lncRNA|AC007686.3|ENSG00000273729.1|ENSG00000273729.1|0|3487	1.08631	2.17889	19.1527	1.71517e-05	0.000311275
hsa_circ_0060994|circRNA|hsa_circ_0060994|hsa_circ_0060994|hsa_circ_0060994|0|600	1.08624	2.41677	25.0119	1.01665e-06	5.26098e-05
ENSG00000130176.7|mRNA|CNN1|ENSG00000130176.7|ENSG00000130176.7|0|2887	1.08524	4.99087	17.8565	3.24329e-05	0.00046875
ENSG00000243709.1|mRNA|LEFTY1|ENSG00000243709.1|ENSG00000243709.1|0|1891	1.08015	2.32121	17.6151	3.65377e-05	0.000507482
ENSG00000199461.1|Y_RNA|Y_RNA|ENSG00000199461.1|ENSG00000199461.1|0|102	1.07819	2.74837	11.9168	0.000643812	0.00379742
ENSG00000169224.12|mRNA|GCSAML|ENSG00000169224.12|ENSG00000169224.12|0|4680	1.07784	5.88324	18.9314	1.91159e-05	0.00033103
ENSG00000171433.11|mRNA|GLOD5|ENSG00000171433.11|ENSG00000171433.11|0|1061	1.07721	1.70157	16.2899	7.05054e-05	0.00080448
hsa_circ_0056360|circRNA|hsa_circ_0056360|hsa_circ_0056360|hsa_circ_0056360|0|600	1.07715	1.07364	15.0902	0.000128451	0.00123647
ENSG00000187391.19|mRNA|MAGI2|ENSG00000187391.19|ENSG00000187391.19|0|31529	1.06658	3.75032	18.1937	2.74658e-05	0.00041982
hsa_circ_0037825|circRNA|hsa_circ_0037825|hsa_circ_0037825|hsa_circ_0037825|0|600	1.0656	1.28374	14.8238	0.000146853	0.00134604
hsa_circ_0048400|circRNA|hsa_circ_0048400|hsa_circ_0048400|hsa_circ_0048400|0|518	1.06009	2.39989	14.1743	0.000203742	0.00169177
ENSG00000198336.9|mRNA|MYL4|ENSG00000198336.9|ENSG00000198336.9|0|1636	1.05565	5.65849	10.1353	0.00162159	0.00735062
ENSG00000268081.1|lncRNA|AC123912.1|ENSG00000268081.1|ENSG00000268081.1|0|447	1.05528	3.17857	10.4544	0.00137274	0.00646808
ENSG00000274641.1|mRNA|HIST1H2BO|ENSG00000274641.1|ENSG00000274641.1|0|381	1.05369	3.59339	15.1147	0.000126883	0.00122997
hsa_circ_0008571|circRNA|hsa_circ_0008571|hsa_circ_0008571|hsa_circ_0008571|0|600	1.04953	1.23081	18.0096	3.00733e-05	0.000446954
hsa_circ_0001766|circRNA|hsa_circ_0001766|hsa_circ_0001766|hsa_circ_0001766|0|600	1.04826	2.14498	20.0789	1.09102e-05	0.000235758
hsa_circ_0038980|circRNA|hsa_circ_0038980|hsa_circ_0038980|hsa_circ_0038980|0|600	1.04326	1.73791	14.942	0.00013838	0.00129935
hsa_circ_0068368|circRNA|hsa_circ_0068368|hsa_circ_0068368|hsa_circ_0068368|0|600	1.04225	1.22282	17.0982	4.71854e-05	0.000600966
hsa_circ_0001696|circRNA|hsa_circ_0001696|hsa_circ_0001696|hsa_circ_0001696|0|600	1.03973	3.54199	19.5979	1.37957e-05	0.000272431
ENSG00000164935.6|mRNA|DCSTAMP|ENSG00000164935.6|ENSG00000164935.6|0|2778	1.0387	1.85436	13.5878	0.000274195	0.00209554
ENSG00000253227.1|lncRNA|AC090192.2|ENSG00000253227.1|ENSG00000253227.1|0|553	1.03652	1.86103	18.5522	2.30266e-05	0.000371876
hsa_circ_0034608|circRNA|hsa_circ_0034608|hsa_circ_0034608|hsa_circ_0034608|0|600	1.03479	1.24671	15.153	0.000124468	0.00121335
ENSG00000139211.6|mRNA|AMIGO2|ENSG00000139211.6|ENSG00000139211.6|0|3956	1.03446	4.42635	29.5306	1.213e-07	1.42314e-05
hsa_circ_0047498|circRNA|hsa_circ_0047498|hsa_circ_0047498|hsa_circ_0047498|0|600	1.03365	1.12399	16.8729	5.27644e-05	0.000649914
ENSG00000131711.14|mRNA|MAP1B|ENSG00000131711.14|ENSG00000131711.14|0|12630	1.03335	4.42526	17.7464	3.42426e-05	0.000483112
hsa_circ_0004901|circRNA|hsa_circ_0004901|hsa_circ_0004901|hsa_circ_0004901|0|600	1.02593	2.21433	21.6205	5.16402e-06	0.000144861
hsa_circ_0017238|circRNA|hsa_circ_0017238|hsa_circ_0017238|hsa_circ_0017238|0|600	1.0249	1.62324	15.1256	0.000126193	0.00122537
hsa_circ_0006846|circRNA|hsa_circ_0006846|hsa_circ_0006846|hsa_circ_0006846|0|600	1.02282	1.2906	15.863	8.72325e-05	0.000932897
hsa_circ_0082399|circRNA|hsa_circ_0082399|hsa_circ_0082399|hsa_circ_0082399|0|600	1.02269	1.30228	16.763	5.57223e-05	0.000676023
hsa_circ_0068683|circRNA|hsa_circ_0068683|hsa_circ_0068683|hsa_circ_0068683|0|600	1.02231	1.14583	15.1065	0.00012741	0.00123123
hsa_circ_0048008|circRNA|hsa_circ_0048008|hsa_circ_0048008|hsa_circ_0048008|0|600	1.02093	0.986612	11.8318	0.000672608	0.0039157
ENSG00000203485.12|mRNA|INF2|ENSG00000203485.12|ENSG00000203485.12|0|9488	1.02066	7.50342	23.2663	2.33884e-06	8.67067e-05
ENSG00000229308.1|lncRNA|AC010737.1|ENSG00000229308.1|ENSG00000229308.1|0|559	1.01919	4.17183	8.96355	0.00300462	0.0115075
hsa_circ_0070800|circRNA|hsa_circ_0070800|hsa_circ_0070800|hsa_circ_0070800|0|600	1.01532	1.72432	16.9471	5.08565e-05	0.000633563
hsa_circ_0008432|circRNA|hsa_circ_0008432|hsa_circ_0008432|hsa_circ_0008432|0|504	1.01374	6.05178	34.7905	1.07465e-08	3.63285e-06
hsa_circ_0003652|circRNA|hsa_circ_0003652|hsa_circ_0003652|hsa_circ_0003652|0|600	1.00939	3.70314	24.9223	1.06092e-06	5.32998e-05
hsa_circ_0008463|circRNA|hsa_circ_0008463|hsa_circ_0008463|hsa_circ_0008463|0|600	1.00908	2.69413	16.4034	6.66313e-05	0.000771755
ENSG00000124302.12|mRNA|CHST8|ENSG00000124302.12|ENSG00000124302.12|0|3052	1.00823	2.99898	15.178	0.000122916	0.00120115
hsa_circ_0001450|circRNA|hsa_circ_0001450|hsa_circ_0001450|hsa_circ_0001450|0|600	1.00725	1.46748	16.294	7.03621e-05	0.000803764
ENSG00000101470.9|mRNA|TNNC2|ENSG00000101470.9|ENSG00000101470.9|0|876	1.00661	6.33016	18.5351	2.32204e-05	0.000374399
ENSG00000167414.4|mRNA|GNG8|ENSG00000167414.4|ENSG00000167414.4|0|216	1.00385	3.55596	15.4084	0.00010951	0.00110535
ENSG00000213185.6|mRNA|FAM24B|ENSG00000213185.6|ENSG00000213185.6|0|1177	1.00252	2.53031	17.9517	3.0945e-05	0.000452946
hsa_circ_0006034|circRNA|hsa_circ_0006034|hsa_circ_0006034|hsa_circ_0006034|0|600	1.00227	1.2645	16.6083	6.01735e-05	0.000715738
ENSG00000103184.11|mRNA|SEC14L5|ENSG00000103184.11|ENSG00000103184.11|0|6477	1.00219	5.85461	14.2338	0.00019771	0.00165965
hsa_circ_0071101|circRNA|hsa_circ_0071101|hsa_circ_0071101|hsa_circ_0071101|0|600	1.00193	1.2788	14.7649	0.00015127	0.00137452
hsa_circ_0059245|circRNA|hsa_circ_0059245|hsa_circ_0059245|hsa_circ_0059245|0|600	1.00147	1.13543	15.7676	9.14953e-05	0.000967589
ENSG00000198960.10|mRNA|ARMCX6|ENSG00000198960.10|ENSG00000198960.10|0|2489	0.999726	7.1913	25.7582	7.13478e-07	4.22264e-05
ENSG00000160991.15|mRNA|ORAI2|ENSG00000160991.15|ENSG00000160991.15|0|11103	0.997303	5.51248	39.2138	1.45523e-09	1.61248e-06
ENSG00000261537.1|lncRNA|AC027279.2|ENSG00000261537.1|ENSG00000261537.1|0|793	0.996868	2.23559	17.6705	3.55506e-05	0.000495844
ENSG00000134986.13|mRNA|NREP|ENSG00000134986.13|ENSG00000134986.13|0|9337	0.996272	5.80938	32.0468	3.77998e-08	7.11243e-06
hsa_circ_0006008|circRNA|hsa_circ_0006008|hsa_circ_0006008|hsa_circ_0006008|0|600	0.995138	2.56473	24.3231	1.41122e-06	6.33935e-05
hsa_circ_0053370|circRNA|hsa_circ_0053370|hsa_circ_0053370|hsa_circ_0053370|0|452	0.994431	1.64117	14.305	0.00019073	0.00161884
hsa_circ_0021158|circRNA|hsa_circ_0021158|hsa_circ_0021158|hsa_circ_0021158|0|600	0.992917	1.09763	14.9908	0.000135032	0.00127935
hsa_circ_0012383|circRNA|hsa_circ_0012383|hsa_circ_0012383|hsa_circ_0012383|0|600	0.989713	3.39599	24.4609	1.32148e-06	6.10114e-05
hsa_circ_0057024|circRNA|hsa_circ_0057024|hsa_circ_0057024|hsa_circ_0057024|0|600	0.989207	1.6595	15.4618	0.000106618	0.00108164
hsa_circ_0003746|circRNA|hsa_circ_0003746|hsa_circ_0003746|hsa_circ_0003746|0|600	0.986914	4.12923	19.6123	1.36993e-05	0.000271386
ENSG00000205240.4|pseudogene|OR7E36P|ENSG00000205240.4|ENSG00000205240.4|0|954	0.986857	1.8234	14.8249	0.00014677	0.00134604
hsa_circ_0007554|circRNA|hsa_circ_0007554|hsa_circ_0007554|hsa_circ_0007554|0|600	0.986175	2.8783	17.269	4.33581e-05	0.00057024
hsa_circ_0034437|circRNA|hsa_circ_0034437|hsa_circ_0034437|hsa_circ_0034437|0|552	0.984395	1.27023	12.2006	0.000556482	0.00342562
hsa_circ_0028254|circRNA|hsa_circ_0028254|hsa_circ_0028254|hsa_circ_0028254|0|600	0.981753	1.19555	14.4478	0.000177468	0.00153165
hsa_circ_0005512|circRNA|hsa_circ_0005512|hsa_circ_0005512|hsa_circ_0005512|0|600	0.980939	1.91147	15.7394	9.279e-05	0.000977204
hsa_circ_0000142|circRNA|hsa_circ_0000142|hsa_circ_0000142|hsa_circ_0000142|0|430	0.97771	1.30882	15.6697	9.60807e-05	0.00100122
ENSG00000149243.15|mRNA|KLHL35|ENSG00000149243.15|ENSG00000149243.15|0|5041	0.975966	2.17205	10.0619	0.00168507	0.00755252
ENSG00000180712.3|lncRNA|LINC02363|ENSG00000180712.3|ENSG00000180712.3|0|2353	0.975525	1.88335	17.9103	3.15828e-05	0.000460467
hsa_circ_0024065|circRNA|hsa_circ_0024065|hsa_circ_0024065|hsa_circ_0024065|0|600	0.973394	1.02535	15.7877	9.05801e-05	0.000958928
ENSG00000196526.10|mRNA|AFAP1|ENSG00000196526.10|ENSG00000196526.10|0|10036	0.971658	6.08934	23.1186	2.51058e-06	9.10428e-05
hsa_circ_0018886|circRNA|hsa_circ_0018886|hsa_circ_0018886|hsa_circ_0018886|0|600	0.971571	2.02855	15.6266	9.81745e-05	0.00101803
hsa_circ_0006167|circRNA|hsa_circ_0006167|hsa_circ_0006167|hsa_circ_0006167|0|600	0.971253	0.915728	12.1933	0.000558559	0.00343524
hsa_circ_0091092|circRNA|hsa_circ_0091092|hsa_circ_0091092|hsa_circ_0091092|0|600	0.969604	0.99399	14.0511	0.00021684	0.00177322
ENSG00000106665.15|mRNA|CLIP2|ENSG00000106665.15|ENSG00000106665.15|0|7315	0.967906	7.02847	22.2305	3.84749e-06	0.000119907
hsa_circ_0063397|circRNA|hsa_circ_0063397|hsa_circ_0063397|hsa_circ_0063397|0|600	0.967426	2.91576	14.3392	0.000187467	0.00160061
hsa_circ_0092013|circRNA|hsa_circ_0092013|hsa_circ_0092013|hsa_circ_0092013|0|600	0.967266	2.26541	14.8879	0.000142195	0.00132267
ENSG00000196353.11|mRNA|CPNE4|ENSG00000196353.11|ENSG00000196353.11|0|6427	0.9634	3.33904	13.5079	0.00028554	0.00215072
ENSG00000237973.1|pseudogene|MTCO1P12|ENSG00000237973.1|ENSG00000237973.1|0|1543	0.963372	2.60194	12.6028	0.00045287	0.00296245
hsa_circ_0087700|circRNA|hsa_circ_0087700|hsa_circ_0087700|hsa_circ_0087700|0|600	0.9633	1.23088	14.1118	0.000210282	0.00173166
hsa_circ_0067474|circRNA|hsa_circ_0067474|hsa_circ_0067474|hsa_circ_0067474|0|600	0.962572	1.27726	15.8065	8.97297e-05	0.000951947
hsa_circ_0077077|circRNA|hsa_circ_0077077|hsa_circ_0077077|hsa_circ_0077077|0|310	0.962403	2.60947	19.0787	1.77849e-05	0.000317281
ENSG00000233718.7|lncRNA|MYCNOS|ENSG00000233718.7|ENSG00000233718.7|0|2413	0.96048	2.2083	13.5266	0.000282842	0.00213604
ENSG00000242156.1|pseudogene|AC000041.1|ENSG00000242156.1|ENSG00000242156.1|0|175	0.959822	2.78968	22.0294	4.23911e-06	0.000127141
ENSG00000087495.16|mRNA|PHACTR3|ENSG00000087495.16|ENSG00000087495.16|0|6095	0.959511	4.88047	18.1789	2.76677e-05	0.000422213
hsa_circ_0000345|circRNA|hsa_circ_0000345|hsa_circ_0000345|hsa_circ_0000345|0|600	0.959438	2.64764	21.2504	6.17643e-06	0.000162733
hsa_circ_0032097|circRNA|hsa_circ_0032097|hsa_circ_0032097|hsa_circ_0032097|0|600	0.959143	1.60161	16.1576	7.53088e-05	0.000840534
hsa_circ_0025750|circRNA|hsa_circ_0025750|hsa_circ_0025750|hsa_circ_0025750|0|600	0.958997	2.83115	18.6653	2.17819e-05	0.000359382
hsa_circ_0084665|circRNA|hsa_circ_0084665|hsa_circ_0084665|hsa_circ_0084665|0|600	0.958565	1.18186	15.7192	9.37358e-05	0.000983461
ENSG00000127831.10|mRNA|VIL1|ENSG00000127831.10|ENSG00000127831.10|0|6920	0.958192	7.00904	14.565	0.000167288	0.00146947
hsa_circ_0068692|circRNA|hsa_circ_0068692|hsa_circ_0068692|hsa_circ_0068692|0|600	0.957598	0.944743	16.2674	7.13007e-05	0.000810208
hsa_circ_0003594|circRNA|hsa_circ_0003594|hsa_circ_0003594|hsa_circ_0003594|0|600	0.957252	0.991613	13.4969	0.00028714	0.00215787
hsa_circ_0006186|circRNA|hsa_circ_0006186|hsa_circ_0006186|hsa_circ_0006186|0|600	0.956116	0.927714	14.0976	0.000211792	0.00174265
hsa_circ_0070959|circRNA|hsa_circ_0070959|hsa_circ_0070959|hsa_circ_0070959|0|600	0.95543	3.88468	17.8006	3.33387e-05	0.000476935
hsa_circ_0034517|circRNA|hsa_circ_0034517|hsa_circ_0034517|hsa_circ_0034517|0|600	0.953593	2.41811	13.213	0.000331718	0.00237975
hsa_circ_0000509|circRNA|hsa_circ_0000509|hsa_circ_0000509|hsa_circ_0000509|0|600	0.951044	1.03726	13.0355	0.000363119	0.00253319
ENSG00000227550.2|pseudogene|TRBV7-5|ENSG00000227550.2|ENSG00000227550.2|0|345	0.950496	3.76533	14.7849	0.000149757	0.00136513
hsa_circ_0055019|circRNA|hsa_circ_0055019|hsa_circ_0055019|hsa_circ_0055019|0|600	0.949963	2.34493	18.602	2.24697e-05	0.000365248
ENSG00000156689.6|mRNA|GLYATL2|ENSG00000156689.6|ENSG00000156689.6|0|1838	0.948437	3.22693	11.0041	0.00103147	0.00530438
hsa_circ_0007151|circRNA|hsa_circ_0007151|hsa_circ_0007151|hsa_circ_0007151|0|600	0.948375	2.73365	20.0493	1.10689e-05	0.000238154
hsa_circ_0070930|circRNA|hsa_circ_0070930|hsa_circ_0070930|hsa_circ_0070930|0|600	0.947091	1.23743	12.061	0.00059782	0.00360445
hsa_circ_0013998|circRNA|hsa_circ_0013998|hsa_circ_0013998|hsa_circ_0013998|0|600	0.946145	1.6627	15.9155	8.4978e-05	0.000915666
hsa_circ_0081607|circRNA|hsa_circ_0081607|hsa_circ_0081607|hsa_circ_0081607|0|600	0.944727	2.43597	14.0452	0.000217487	0.00177487
ENSG00000154917.10|mRNA|RAB6B|ENSG00000154917.10|ENSG00000154917.10|0|6005	0.943931	7.02786	13.451	0.000293912	0.00219225
hsa_circ_0042801|circRNA|hsa_circ_0042801|hsa_circ_0042801|hsa_circ_0042801|0|600	0.943557	2.61222	16.6815	5.80255e-05	0.000697028
ENSG00000263740.2|srpRNA|RN7SL4P|ENSG00000263740.2|ENSG00000263740.2|0|295	0.943234	3.87975	16.6671	5.84415e-05	0.00070049
hsa_circ_0019133|circRNA|hsa_circ_0019133|hsa_circ_0019133|hsa_circ_0019133|0|600	0.94277	1.1091	14.202	0.000200914	0.00167448
ENSG00000214447.4|mRNA|FAM187A|ENSG00000214447.4|ENSG00000214447.4|0|3459	0.942398	1.99601	13.7332	0.000254699	0.00198973
hsa_circ_0018184|circRNA|hsa_circ_0018184|hsa_circ_0018184|hsa_circ_0018184|0|600	0.941544	2.03855	14.9341	0.000138929	0.00130274
hsa_circ_0086908|circRNA|hsa_circ_0086908|hsa_circ_0086908|hsa_circ_0086908|0|600	0.940418	1.14402	10.7295	0.00118953	0.00584652
hsa_circ_0056663|circRNA|hsa_circ_0056663|hsa_circ_0056663|hsa_circ_0056663|0|600	0.94034	1.07003	12.7271	0.000424998	0.00283119
ENSG00000224786.2|pseudogene|CETN4P|ENSG00000224786.2|ENSG00000224786.2|0|3858	0.940021	2.85851	13.4825	0.000289249	0.00216719
hsa_circ_0091888|circRNA|hsa_circ_0091888|hsa_circ_0091888|hsa_circ_0091888|0|552	0.93922	1.94275	12.0326	0.00060662	0.00364043
hsa_circ_0058255|circRNA|hsa_circ_0058255|hsa_circ_0058255|hsa_circ_0058255|0|600	0.936845	0.899665	13.0373	0.000362781	0.00253172
hsa_circ_0073526|circRNA|hsa_circ_0073526|hsa_circ_0073526|hsa_circ_0073526|0|600	0.935329	1.74364	14.0593	0.000215937	0.00176655
hsa_circ_0081343|circRNA|hsa_circ_0081343|hsa_circ_0081343|hsa_circ_0081343|0|446	0.935145	1.71654	12.5535	0.000464439	0.00301806
hsa_circ_0065145|circRNA|hsa_circ_0065145|hsa_circ_0065145|hsa_circ_0065145|0|600	0.934357	1.36024	13.5942	0.000273308	0.00209225
hsa_circ_0003783|circRNA|hsa_circ_0003783|hsa_circ_0003783|hsa_circ_0003783|0|600	0.934137	1.39686	12.4238	0.00049631	0.00316866
ENSG00000158373.8|mRNA|HIST1H2BD|ENSG00000158373.8|ENSG00000158373.8|0|871	0.933259	6.40607	17.4118	4.03998e-05	0.000545117
hsa_circ_0069111|circRNA|hsa_circ_0069111|hsa_circ_0069111|hsa_circ_0069111|0|600	0.932887	1.23688	12.6887	0.00043342	0.00286965
ENSG00000011105.12|mRNA|TSPAN9|ENSG00000011105.12|ENSG00000011105.12|0|6905	0.931492	6.05664	15.9214	8.47277e-05	0.00091395
hsa_circ_0091948|circRNA|hsa_circ_0091948|hsa_circ_0091948|hsa_circ_0091948|0|380	0.931029	1.53285	12.5669	0.000461269	0.00300081
ENSG00000279198.1|lncRNA|AC008894.3|ENSG00000279198.1|ENSG00000279198.1|0|3103	0.930064	3.52586	12.8372	0.000401758	0.002721
hsa_circ_0015124|circRNA|hsa_circ_0015124|hsa_circ_0015124|hsa_circ_0015124|0|600	0.928911	1.38707	16.4809	6.411e-05	0.000749077
ENSG00000280832.1|lncRNA|GSEC|ENSG00000280832.1|ENSG00000280832.1|0|3723	0.928699	1.99612	16.8252	5.40282e-05	0.00066186
hsa_circ_0079303|circRNA|hsa_circ_0079303|hsa_circ_0079303|hsa_circ_0079303|0|600	0.927594	0.955892	14.6134	0.000281742	0.00213258
ENSG00000167131.16|mRNA|CCDC103|ENSG00000167131.16|ENSG00000167131.16|0|3895	0.926763	2.04217	13.7754	0.00024931	0.00195922
hsa_circ_0068926|circRNA|hsa_circ_0068926|hsa_circ_0068926|hsa_circ_0068926|0|600	0.92374	0.964356	13.9168	0.000232085	0.00185677
ENSG00000134201.10|mRNA|GSTM5|ENSG00000134201.10|ENSG00000134201.10|0|6013	0.922284	3.63084	6.05179	0.0145073	0.0376182
ENSG00000148848.14|mRNA|ADAM12|ENSG00000148848.14|ENSG00000148848.14|0|9860	0.921356	3.34418	12.8676	0.000395579	0.00269243
hsa_circ_0060526|circRNA|hsa_circ_0060526|hsa_circ_0060526|hsa_circ_0060526|0|600	0.921244	1.33608	13.5467	0.000279973	0.00212322
ENSG00000213977.7|mRNA|TAX1BP3|ENSG00000213977.7|ENSG00000213977.7|0|1383	0.919818	6.55605	21.5852	5.25293e-06	0.000146942
hsa_circ_0007011|circRNA|hsa_circ_0007011|hsa_circ_0007011|hsa_circ_0007011|0|540	0.919174	1.54644	11.3887	0.000845286	0.00463803
hsa_circ_0071030|circRNA|hsa_circ_0071030|hsa_circ_0071030|hsa_circ_0071030|0|600	0.916799	1.04029	12.6922	0.00043263	0.00286965
hsa_circ_0034495|circRNA|hsa_circ_0034495|hsa_circ_0034495|hsa_circ_0034495|0|562	0.916433	1.0799	9.21026	0.00263697	0.0104603
ENSG00000109089.7|mRNA|CDR2L|ENSG00000109089.7|ENSG00000109089.7|0|3536	0.916025	2.13987	12.8364	0.000401913	0.00272103
hsa_circ_0077708|circRNA|hsa_circ_0077708|hsa_circ_0077708|hsa_circ_0077708|0|600	0.914886	1.3245	12.2332	0.000547254	0.00339607
hsa_circ_0091768|circRNA|hsa_circ_0091768|hsa_circ_0091768|hsa_circ_0091768|0|600	0.914734	1.79661	14.7195	0.000154763	0.0013957
hsa_circ_0018154|circRNA|hsa_circ_0018154|hsa_circ_0018154|hsa_circ_0018154|0|600	0.914619	1.35324	11.2558	0.0009054	0.0048622
hsa_circ_0051220|circRNA|hsa_circ_0051220|hsa_circ_0051220|hsa_circ_0051220|0|478	0.914525	1.10984	9.74916	0.00198532	0.00846457
hsa_circ_0091934|circRNA|hsa_circ_0091934|hsa_circ_0091934|hsa_circ_0091934|0|600	0.911912	1.77994	10.674	0.00122436	0.0059677
hsa_circ_0070806|circRNA|hsa_circ_0070806|hsa_circ_0070806|hsa_circ_0070806|0|600	0.911678	1.36882	13.7096	0.000257769	0.00200828
ENSG00000236875.3|pseudogene|DDX11L5|ENSG00000236875.3|ENSG00000236875.3|0|654	0.911214	4.37446	14.9036	0.000141077	0.00131628
hsa_circ_0002402|circRNA|hsa_circ_0002402|hsa_circ_0002402|hsa_circ_0002402|0|600	0.911149	1.06075	12.3899	0.000505016	0.00320884
ENSG00000165948.10|mRNA|IFI27L1|ENSG00000165948.10|ENSG00000165948.10|0|2380	0.91013	2.19745	15.486	0.000105331	0.00107459
ENSG00000127325.18|mRNA|BEST3|ENSG00000127325.18|ENSG00000127325.18|0|6863	0.910017	3.92784	12.4024	0.000501794	0.00319592
ENSG00000144868.13|mRNA|TMEM108|ENSG00000144868.13|ENSG00000144868.13|0|8425	0.909836	3.13724	14.4336	0.000178748	0.00154134
hsa_circ_0042806|circRNA|hsa_circ_0042806|hsa_circ_0042806|hsa_circ_0042806|0|600	0.909819	1.63546	15.0779	0.000129248	0.00124024
hsa_circ_0005321|circRNA|hsa_circ_0005321|hsa_circ_0005321|hsa_circ_0005321|0|600	0.909283	1.03574	13.1117	0.000349275	0.00246333
hsa_circ_0007206|circRNA|hsa_circ_0007206|hsa_circ_0007206|hsa_circ_0007206|0|594	0.908842	1.64534	13.5713	0.000276498	0.00210574
ENSG00000228409.6|pseudogene|CCT6P1|ENSG00000228409.6|ENSG00000228409.6|0|1670	0.905635	6.47792	16.4832	6.40355e-05	0.000748644
ENSG00000157978.11|mRNA|LDLRAP1|ENSG00000157978.11|ENSG00000157978.11|0|5397	0.905631	7.90942	20.1938	1.03167e-05	0.000226117
hsa_circ_0006270|circRNA|hsa_circ_0006270|hsa_circ_0006270|hsa_circ_0006270|0|600	0.905231	1.12537	10.0562	0.00169013	0.00757179
hsa_circ_0030069|circRNA|hsa_circ_0030069|hsa_circ_0030069|hsa_circ_0030069|0|600	0.904868	1.04282	13.335	0.000311763	0.0022873
hsa_circ_0067778|circRNA|hsa_circ_0067778|hsa_circ_0067778|hsa_circ_0067778|0|600	0.904248	0.973054	11.9122	0.000645344	0.00379911
hsa_circ_0088058|circRNA|hsa_circ_0088058|hsa_circ_0088058|hsa_circ_0088058|0|600	0.904027	3.46822	17.4093	4.04502e-05	0.000545121
hsa_circ_0073869|circRNA|hsa_circ_0073869|hsa_circ_0073869|hsa_circ_0073869|0|254	0.903766	0.96034	9.91323	0.00182157	0.0079691
hsa_circ_0063714|circRNA|hsa_circ_0063714|hsa_circ_0063714|hsa_circ_0063714|0|488	0.903405	0.949713	10.1809	0.0015834	0.00721682
hsa_circ_0007304|circRNA|hsa_circ_0007304|hsa_circ_0007304|hsa_circ_0007304|0|600	0.901765	1.66892	14.8421	0.000145509	0.0013422
hsa_circ_0080835|circRNA|hsa_circ_0080835|hsa_circ_0080835|hsa_circ_0080835|0|600	0.901292	4.22135	16.0737	7.85258e-05	0.000864824
ENSG00000124116.18|mRNA|WFDC3|ENSG00000124116.18|ENSG00000124116.18|0|2405	0.901068	2.50263	12.4206	0.000497135	0.00317291
hsa_circ_0007365|circRNA|hsa_circ_0007365|hsa_circ_0007365|hsa_circ_0007365|0|600	0.900561	1.93559	17.3162	4.23573e-05	0.000560595
hsa_circ_0060734|circRNA|hsa_circ_0060734|hsa_circ_0060734|hsa_circ_0060734|0|600	0.900405	1.39697	14.0466	0.000217332	0.00177487
ENSG00000185825.15|mRNA|BCAP31|ENSG00000185825.15|ENSG00000185825.15|0|2624	0.898256	8.15027	19.9522	1.16054e-05	0.000243854
hsa_circ_0031446|circRNA|hsa_circ_0031446|hsa_circ_0031446|hsa_circ_0031446|0|600	0.896954	4.31754	17.3955	4.07274e-05	0.000547377
ENSG00000206573.8|lncRNA|THUMPD3-AS1|ENSG00000206573.8|ENSG00000206573.8|0|6275	0.896902	4.98606	22.2981	3.7241e-06	0.000118276
hsa_circ_0032039|circRNA|hsa_circ_0032039|hsa_circ_0032039|hsa_circ_0032039|0|600	0.896705	0.913528	7.62183	0.00615436	0.0196681
hsa_circ_0079329|circRNA|hsa_circ_0079329|hsa_circ_0079329|hsa_circ_0079329|0|544	0.896346	0.93225	11.6281	0.000747015	0.00422074
ENSG00000248489.1|lncRNA|LINC02062|ENSG00000248489.1|ENSG00000248489.1|0|478	0.895226	2.05424	14.5413	0.000169298	0.00147904
ENSG00000228063.1|lncRNA|LYPLAL1-AS1|ENSG00000228063.1|ENSG00000228063.1|0|724	0.895049	6.27654	12.0807	0.000591789	0.00357674
ENSG00000085117.11|mRNA|CD82|ENSG00000085117.11|ENSG00000085117.11|0|4054	0.894959	5.99486	19.5717	1.39736e-05	0.000274045
hsa_circ_0069198|circRNA|hsa_circ_0069198|hsa_circ_0069198|hsa_circ_0069198|0|600	0.8945	1.26024	9.9889	0.00175076	0.00775801
ENSG00000189326.4|mRNA|SPANXN4|ENSG00000189326.4|ENSG00000189326.4|0|625	0.894255	2.42869	9.3963	0.00239036	0.0097245
hsa_circ_0023339|circRNA|hsa_circ_0023339|hsa_circ_0023339|hsa_circ_0023339|0|444	0.894126	2.68205	12.7685	0.000416096	0.00278491
hsa_circ_0006393|circRNA|hsa_circ_0006393|hsa_circ_0006393|hsa_circ_0006393|0|600	0.893832	1.26718	12.8268	0.000403902	0.00272986
hsa_circ_0085601|circRNA|hsa_circ_0085601|hsa_circ_0085601|hsa_circ_0085601|0|600	0.893636	1.97034	12.6402	0.0004443	0.00291691
hsa_circ_0003548|circRNA|hsa_circ_0003548|hsa_circ_0003548|hsa_circ_0003548|0|600	0.893292	1.26878	14.2349	0.000197603	0.00165965
hsa_circ_0005472|circRNA|hsa_circ_0005472|hsa_circ_0005472|hsa_circ_0005472|0|600	0.893107	2.92949	15.9254	8.4558e-05	0.000913107
ENSG00000138031.14|mRNA|ADCY3|ENSG00000138031.14|ENSG00000138031.14|0|6058	0.892021	5.5751	13.2511	0.000325364	0.00235379
ENSG00000140859.15|mRNA|KIFC3|ENSG00000140859.15|ENSG00000140859.15|0|9600	0.890983	6.65155	19.2107	1.66711e-05	0.000305331
ENSG00000156381.8|mRNA|ANKRD9|ENSG00000156381.8|ENSG00000156381.8|0|7215	0.890759	4.77651	18.0009	3.02027e-05	0.000447125
hsa_circ_0047846|circRNA|hsa_circ_0047846|hsa_circ_0047846|hsa_circ_0047846|0|600	0.888607	1.05649	10.8908	0.00109393	0.00551109
hsa_circ_0058040|circRNA|hsa_circ_0058040|hsa_circ_0058040|hsa_circ_0058040|0|600	0.888549	0.961917	10.9426	0.00106489	0.00540839
hsa_circ_0002658|circRNA|hsa_circ_0002658|hsa_circ_0002658|hsa_circ_0002658|0|600	0.888294	1.17972	11.0184	0.00102387	0.00528049
hsa_circ_0026244|circRNA|hsa_circ_0026244|hsa_circ_0026244|hsa_circ_0026244|0|600	0.886399	1.01175	12.9171	0.000385699	0.00264356
hsa_circ_0017331|circRNA|hsa_circ_0017331|hsa_circ_0017331|hsa_circ_0017331|0|600	0.886288	1.13987	12.531	0.000469814	0.00304334
ENSG00000106089.11|mRNA|STX1A|ENSG00000106089.11|ENSG00000106089.11|0|3693	0.885928	5.70348	15.8189	8.91769e-05	0.000947594
hsa_circ_0070820|circRNA|hsa_circ_0070820|hsa_circ_0070820|hsa_circ_0070820|0|600	0.885219	1.22951	10.0513	0.00169451	0.00758148
hsa_circ_0035951|circRNA|hsa_circ_0035951|hsa_circ_0035951|hsa_circ_0035951|0|600	0.884688	1.04103	12.5443	0.000466617	0.00302656
ENSG00000281344.1|lncRNA|HELLPAR|ENSG00000281344.1|ENSG00000281344.1|0|205012	0.884218	2.4218	9.83329	0.00189956	0.0082135
hsa_circ_0072593|circRNA|hsa_circ_0072593|hsa_circ_0072593|hsa_circ_0072593|0|540	0.88341	5.5949	17.1755	4.54133e-05	0.000587398
hsa_circ_0006089|circRNA|hsa_circ_0006089|hsa_circ_0006089|hsa_circ_0006089|0|600	0.883288	3.09353	14.0854	0.000213106	0.00174914
hsa_circ_0006388|circRNA|hsa_circ_0006388|hsa_circ_0006388|hsa_circ_0006388|0|600	0.882906	2.37259	15.8917	8.59933e-05	0.000923109
ENSG00000105507.2|mRNA|CABP5|ENSG00000105507.2|ENSG00000105507.2|0|1501	0.881926	6.62577	11.705	0.000717996	0.00411034
hsa_circ_0035945|circRNA|hsa_circ_0035945|hsa_circ_0035945|hsa_circ_0035945|0|600	0.881611	1.18922	10.836	0.0011255	0.00561963
hsa_circ_0036197|circRNA|hsa_circ_0036197|hsa_circ_0036197|hsa_circ_0036197|0|600	0.88126	1.86246	11.26	0.000903421	0.00485549
hsa_circ_0007912|circRNA|hsa_circ_0007912|hsa_circ_0007912|hsa_circ_0007912|0|600	0.878718	1.6342	13.503	0.000286258	0.00215515
ENSG00000187653.11|pseudogene|TMSB4XP8|ENSG00000187653.11|ENSG00000187653.11|0|135	0.878179	2.04889	11.2788	0.00089469	0.00483201
hsa_circ_0061349|circRNA|hsa_circ_0061349|hsa_circ_0061349|hsa_circ_0061349|0|596	0.878016	1.28144	9.51522	0.0022452	0.00927131
hsa_circ_0025939|circRNA|hsa_circ_0025939|hsa_circ_0025939|hsa_circ_0025939|0|600	0.877789	2.0039	13.193	0.000335127	0.00239621
hsa_circ_0033474|circRNA|hsa_circ_0033474|hsa_circ_0033474|hsa_circ_0033474|0|600	0.872487	1.07306	12.1517	0.000570619	0.00348363
ENSG00000282828.1|lncRNA|AC009971.1|ENSG00000282828.1|ENSG00000282828.1|0|673	0.872203	5.33322	10.6174	0.00126098	0.00609408
ENSG00000233822.4|mRNA|HIST1H2BN|ENSG00000233822.4|ENSG00000233822.4|0|5477	0.872164	6.21645	12.3811	0.000507282	0.00321518
ENSG00000242349.5|lncRNA|NPPA-AS1|ENSG00000242349.5|ENSG00000242349.5|0|1427	0.870939	3.86558	13.2001	0.000333911	0.00239047
ENSG00000282458.1|pseudogene|WASH5P|ENSG00000282458.1|ENSG00000282458.1|0|6331	0.87042	2.79418	13.5515	0.000279299	0.00212081
ENSG00000247498.9|lncRNA|GPRC5D-AS1|ENSG00000247498.9|ENSG00000247498.9|0|3416	0.870217	2.39588	6.5033	0.0113098	0.0311223
ENSG00000228215.2|lncRNA|AL954650.1|ENSG00000228215.2|ENSG00000228215.2|0|2051	0.870023	3.46571	12.1775	0.000563103	0.00345147
hsa_circ_0000542|circRNA|hsa_circ_0000542|hsa_circ_0000542|hsa_circ_0000542|0|600	0.869867	2.69829	17.56	3.75447e-05	0.000517863
ENSG00000084731.14|mRNA|KIF3C|ENSG00000084731.14|ENSG00000084731.14|0|6403	0.868847	5.29188	13.334	0.000311917	0.0022873
hsa_circ_0010467|circRNA|hsa_circ_0010467|hsa_circ_0010467|hsa_circ_0010467|0|600	0.868594	1.03721	10.0883	0.00166196	0.00747584
hsa_circ_0004303|circRNA|hsa_circ_0004303|hsa_circ_0004303|hsa_circ_0004303|0|600	0.867763	1.04448	10.8239	0.0011326	0.00564461
ENSG00000270882.2|mRNA|HIST2H4A|ENSG00000270882.2|ENSG00000270882.2|0|1876	0.867398	4.5917	11.2214	0.000921649	0.004919
hsa_circ_0009732|circRNA|hsa_circ_0009732|hsa_circ_0009732|hsa_circ_0009732|0|600	0.867393	1.07607	8.00724	0.00500222	0.0169015
ENSG00000272573.5|mRNA|MUSTN1|ENSG00000272573.5|ENSG00000272573.5|0|902	0.866257	3.21246	9.38416	0.00240571	0.00977031
hsa_circ_0002035|circRNA|hsa_circ_0002035|hsa_circ_0002035|hsa_circ_0002035|0|600	0.866187	1.1722	12.4064	0.000500753	0.00319192
hsa_circ_0002943|circRNA|hsa_circ_0002943|hsa_circ_0002943|hsa_circ_0002943|0|600	0.865888	1.20019	13.9553	0.000227608	0.00183124
ENSG00000105717.13|mRNA|PBX4|ENSG00000105717.13|ENSG00000105717.13|0|2554	0.864717	4.37613	18.5353	2.32182e-05	0.000374399
hsa_circ_0042519|circRNA|hsa_circ_0042519|hsa_circ_0042519|hsa_circ_0042519|0|600	0.864597	2.39666	13.396	0.00030225	0.00223771
hsa_circ_0000697|circRNA|hsa_circ_0000697|hsa_circ_0000697|hsa_circ_0000697|0|600	0.864164	1.28399	12.059	0.000598449	0.00360606
ENSG00000126709.14|mRNA|IFI6|ENSG00000126709.14|ENSG00000126709.14|0|865	0.864076	4.014	19.2389	1.64429e-05	0.000302261
hsa_circ_0028670|circRNA|hsa_circ_0028670|hsa_circ_0028670|hsa_circ_0028670|0|600	0.862674	1.57179	11.5746	0.00076792	0.00430592
hsa_circ_0070224|circRNA|hsa_circ_0070224|hsa_circ_0070224|hsa_circ_0070224|0|600	0.862566	1.20768	11.7187	0.000712918	0.00409184
hsa_circ_0006887|circRNA|hsa_circ_0006887|hsa_circ_0006887|hsa_circ_0006887|0|600	0.862254	3.36182	16.0162	8.08113e-05	0.000883168
ENSG00000074416.13|mRNA|MGLL|ENSG00000074416.13|ENSG00000074416.13|0|10102	0.861446	7.67369	17.6288	3.62914e-05	0.000505469
hsa_circ_0060985|circRNA|hsa_circ_0060985|hsa_circ_0060985|hsa_circ_0060985|0|600	0.860807	1.09521	11.113	0.000974857	0.00512076
ENSG00000204525.16|mRNA|HLA-C|ENSG00000204525.16|ENSG00000204525.16|0|2507	0.860697	8.43989	16.4403	6.54188e-05	0.000760361
hsa_circ_0014632|circRNA|hsa_circ_0014632|hsa_circ_0014632|hsa_circ_0014632|0|600	0.860656	1.00239	10.3958	0.00141531	0.0066248
ENSG00000237118.3|pseudogene|CYP2F2P|ENSG00000237118.3|ENSG00000237118.3|0|1547	0.857714	3.41472	11.5378	0.000782628	0.00436824
hsa_circ_0091171|circRNA|hsa_circ_0091171|hsa_circ_0091171|hsa_circ_0091171|0|600	0.856535	1.01148	10.9893	0.00103943	0.00532533
hsa_circ_0073706|circRNA|hsa_circ_0073706|hsa_circ_0073706|hsa_circ_0073706|0|600	0.856163	1.93625	11.6016	0.000757308	0.00425839
hsa_circ_0047886|circRNA|hsa_circ_0047886|hsa_circ_0047886|hsa_circ_0047886|0|560	0.85606	1.19989	10.8841	0.00109774	0.00552611
ENSG00000113645.14|mRNA|WWC1|ENSG00000113645.14|ENSG00000113645.14|0|10076	0.854952	3.22102	11.5764	0.000767196	0.0043035
ENSG00000115556.13|mRNA|PLCD4|ENSG00000115556.13|ENSG00000115556.13|0|5867	0.854944	2.24521	12.9125	0.000386614	0.0026462
ENSG00000234927.1|pseudogene|HMGN1P18|ENSG00000234927.1|ENSG00000234927.1|0|277	0.854444	2.04845	9.16203	0.00270504	0.0106646
hsa_circ_0079439|circRNA|hsa_circ_0079439|hsa_circ_0079439|hsa_circ_0079439|0|346	0.854266	2.06922	13.2931	0.000318476	0.0023191
hsa_circ_0007017|circRNA|hsa_circ_0007017|hsa_circ_0007017|hsa_circ_0007017|0|600	0.853959	2.08568	9.76942	0.00196432	0.00839476
hsa_circ_0006451|circRNA|hsa_circ_0006451|hsa_circ_0006451|hsa_circ_0006451|0|538	0.852745	1.17737	8.26082	0.00436714	0.0152331
hsa_circ_0026227|circRNA|hsa_circ_0026227|hsa_circ_0026227|hsa_circ_0026227|0|600	0.851895	1.53329	8.14775	0.00463943	0.0159595
hsa_circ_0005739|circRNA|hsa_circ_0005739|hsa_circ_0005739|hsa_circ_0005739|0|600	0.851813	1.37252	13.2224	0.000330144	0.0023742
ENSG00000198168.8|mRNA|SVIP|ENSG00000198168.8|ENSG00000198168.8|0|5263	0.851807	7.91825	26.0051	6.34776e-07	3.95318e-05
hsa_circ_0052606|circRNA|hsa_circ_0052606|hsa_circ_0052606|hsa_circ_0052606|0|600	0.851331	1.23038	8.7843	0.00330432	0.0123209
hsa_circ_0004745|circRNA|hsa_circ_0004745|hsa_circ_0004745|hsa_circ_0004745|0|600	0.851114	0.994451	9.05209	0.00286701	0.0111207
ENSG00000226824.6|lncRNA|AC006001.2|ENSG00000226824.6|ENSG00000226824.6|0|938	0.850679	4.28363	11.6634	0.000733553	0.00417305
ENSG00000224046.1|lncRNA|AC005076.1|ENSG00000224046.1|ENSG00000224046.1|0|888	0.850596	3.74185	12.7123	0.00042822	0.002846
hsa_circ_0038645|circRNA|hsa_circ_0038645|hsa_circ_0038645|hsa_circ_0038645|0|600	0.850085	1.11623	11.1826	0.000940337	0.00498936
hsa_circ_0087257|circRNA|hsa_circ_0087257|hsa_circ_0087257|hsa_circ_0087257|0|600	0.850057	1.58568	11.1437	0.000959495	0.00506407
hsa_circ_0017241|circRNA|hsa_circ_0017241|hsa_circ_0017241|hsa_circ_0017241|0|600	0.849791	3.41794	21.1765	6.40145e-06	0.000165864
ENSG00000187800.13|mRNA|PEAR1|ENSG00000187800.13|ENSG00000187800.13|0|5530	0.849625	7.05689	13.7441	0.000253293	0.0019827
[truncated: 19,621 more rows]

## Sheet: bowtie2 stomach OvR
genus	logFC	logCPM	F	PValue	FDR
[truncated: 787 more rows]

## Sheet: kraken2 stomach OvR
genus	logFC	logCPM	F	PValue	FDR
[truncated: 787 more rows]

## Sheet: human liver OvR
gene id	logFC	logCPM	F	PValue	FDR
[truncated: 19,945 more rows]

[truncated: 8 more sheets: bowtie2 liver OvR, kraken2 liver OvR, human lung OvR, bowtie2 lung OvR, kraken2 lung OvR, human esophagus OvR, bowtie2 esophagus OvR, kraken2 esophagus OvR]
