# Supplementary material for: Cancer type classification using plasma cell-free RNAs derived from human and microbes
Source: eLife. 2022 Jul 11;11:e75181. doi: 10.7554/eLife.75181 (PMC9273212; doi:10.7554/eLife.75181)
Supplement: Supplementary file 7. [file elife-75181-supp7.xlsx]

## Sheet: expression-cancer-HD
feature	count	importance-rank
ENSG00000255508.7|mRNA|AP002990.1|ENSG00000255508.7|ENSG00000255508.7|0|5197	100	12.06
ENSG00000254772.9|mRNA|EEF1G|ENSG00000254772.9|ENSG00000254772.9|0|2716	99	12.5859
ENSG00000135486.17|mRNA|HNRNPA1|ENSG00000135486.17|ENSG00000135486.17|0|5093	99	9.05051
ENSG00000156508.17|mRNA|EEF1A1|ENSG00000156508.17|ENSG00000156508.17|0|5948	96	21.1562
ENSG00000168028.13|mRNA|RPSA|ENSG00000168028.13|ENSG00000168028.13|0|3936	93	29.7849
ENSG00000140988.15|mRNA|RPS2|ENSG00000140988.15|ENSG00000140988.15|0|2413	93	30.7742
ENSG00000171863.12|mRNA|RPS7|ENSG00000171863.12|ENSG00000171863.12|0|5583	91	39.6044
ENSG00000063046.17|mRNA|EIF4B|ENSG00000063046.17|ENSG00000063046.17|0|6146	88	25.4545
ENSG00000231500.6|mRNA|RPS18|ENSG00000231500.6|ENSG00000231500.6|0|1898	86	51.6163
ENSG00000105193.8|mRNA|RPS16|ENSG00000105193.8|ENSG00000105193.8|0|2603	85	31.7412
ENSG00000129158.10|mRNA|SERGEF|ENSG00000129158.10|ENSG00000129158.10|0|3502	84	20.5357
ENSG00000124614.13|mRNA|RPS10|ENSG00000124614.13|ENSG00000124614.13|0|1642	84	53.5238
ENSG00000147403.16|mRNA|RPL10|ENSG00000147403.16|ENSG00000147403.16|0|4825	83	41.494
ENSG00000279738.1|lncRNA|AL022311.1|ENSG00000279738.1|ENSG00000279738.1|0|19416	82	25.8659
ENSG00000257267.3|pseudogene|ZNF271P|ENSG00000257267.3|ENSG00000257267.3|0|7450	79	37.3924
ENSG00000145425.9|mRNA|RPS3A|ENSG00000145425.9|ENSG00000145425.9|0|2341	79	43.1392
ENSG00000169100.13|mRNA|SLC25A6|ENSG00000169100.13|ENSG00000169100.13|0|2164	74	45.0676
ENSG00000134419.15|mRNA|RPS15A|ENSG00000134419.15|ENSG00000134419.15|0|6679	72	52.8889
ENSG00000142937.11|mRNA|RPS8|ENSG00000142937.11|ENSG00000142937.11|0|2847	68	45.6471
ENSG00000137845.14|mRNA|ADAM10|ENSG00000137845.14|ENSG00000137845.14|0|16168	68	55.8235
ENSG00000112306.7|mRNA|RPS12|ENSG00000112306.7|ENSG00000112306.7|0|767	66	43.0909
ENSG00000161016.17|mRNA|RPL8|ENSG00000161016.17|ENSG00000161016.17|0|2159	64	62.4062
ENSG00000265399.1|lncRNA|AP005329.2|ENSG00000265399.1|ENSG00000265399.1|0|1771	64	30.4062
ENSG00000100129.17|mRNA|EIF3L|ENSG00000100129.17|ENSG00000100129.17|0|4296	64	28.5469
ENSG00000198755.10|mRNA|RPL10A|ENSG00000198755.10|ENSG00000198755.10|0|1501	62	50.3226
ENSG00000255448.1|lncRNA|AC055860.1|ENSG00000255448.1|ENSG00000255448.1|0|688	62	15.0968
ENSG00000167522.14|mRNA|ANKRD11|ENSG00000167522.14|ENSG00000167522.14|0|16949	62	27.1774
ENSG00000278845.4|mRNA|MRPL45|ENSG00000278845.4|ENSG00000278845.4|0|1705	61	45.1148
ENSG00000198034.10|mRNA|RPS4X|ENSG00000198034.10|ENSG00000198034.10|0|2982	58	68.069
ENSG00000175470.18|mRNA|PPP2R2D|ENSG00000175470.18|ENSG00000175470.18|0|7756	57	65.5439
ENSG00000276141.4|pseudogene|WHAMMP3|ENSG00000276141.4|ENSG00000276141.4|0|7269	56	46.9107
ENSG00000138326.18|mRNA|RPS24|ENSG00000138326.18|ENSG00000138326.18|0|4880	56	46.25
ENSG00000114942.13|mRNA|EEF1B2|ENSG00000114942.13|ENSG00000114942.13|0|1915	55	64.8182
ENSG00000109475.16|mRNA|RPL34|ENSG00000109475.16|ENSG00000109475.16|0|3393	55	49.0909
ENSG00000111276.10|mRNA|CDKN1B|ENSG00000111276.10|ENSG00000111276.10|0|2811	54	31.2407
ENSG00000254975.1|lncRNA|AP001189.4|ENSG00000254975.1|ENSG00000254975.1|0|452	53	46.0755
ENSG00000168522.12|mRNA|FNTA|ENSG00000168522.12|ENSG00000168522.12|0|9551	51	39.9412
ENSG00000175390.13|mRNA|EIF3F|ENSG00000175390.13|ENSG00000175390.13|0|9431	51	38.9608
ENSG00000163541.11|mRNA|SUCLG1|ENSG00000163541.11|ENSG00000163541.11|0|4286	50	48.92
hsa_circ_0070803|circRNA|hsa_circ_0070803|hsa_circ_0070803|hsa_circ_0070803|0|600	50	37.26
ENSG00000148303.16|mRNA|RPL7A|ENSG00000148303.16|ENSG00000148303.16|0|2242	49	68.9592
ENSG00000163738.18|mRNA|MTHFD2L|ENSG00000163738.18|ENSG00000163738.18|0|9819	49	43.5102
ENSG00000143344.15|mRNA|RGL1|ENSG00000143344.15|ENSG00000143344.15|0|5305	48	34.3333
ENSG00000117091.9|mRNA|CD48|ENSG00000117091.9|ENSG00000117091.9|0|3274	48	47.6667
ENSG00000102317.17|mRNA|RBM3|ENSG00000102317.17|ENSG00000102317.17|0|3731	47	23.8085
ENSG00000167526.13|mRNA|RPL13|ENSG00000167526.13|ENSG00000167526.13|0|6172	46	69.7391
ENSG00000104408.9|mRNA|EIF3E|ENSG00000104408.9|ENSG00000104408.9|0|6005	46	39.0652
ENSG00000260342.2|mRNA|AC138811.2|ENSG00000260342.2|ENSG00000260342.2|0|764	45	58.6
ENSG00000134851.12|mRNA|TMEM165|ENSG00000134851.12|ENSG00000134851.12|0|7045	44	49.9545
ENSG00000169230.9|mRNA|PRELID1|ENSG00000169230.9|ENSG00000169230.9|0|1875	44	22.4091
ENSG00000149273.14|mRNA|RPS3|ENSG00000149273.14|ENSG00000149273.14|0|5894	43	55.3023
ENSG00000090554.12|mRNA|FLT3LG|ENSG00000090554.12|ENSG00000090554.12|0|2846	42	28.0238
ENSG00000063177.12|mRNA|RPL18|ENSG00000063177.12|ENSG00000063177.12|0|4209	41	69.9268
ENSG00000277957.1|mRNA|SENP3-EIF4A1|ENSG00000277957.1|ENSG00000277957.1|0|3519	41	28.8049
ENSG00000114737.15|mRNA|CISH|ENSG00000114737.15|ENSG00000114737.15|0|5112	41	57.0488
ENSG00000155463.12|mRNA|OXA1L|ENSG00000155463.12|ENSG00000155463.12|0|4497	41	42.4878
ENSG00000261840.2|lncRNA|AC093249.6|ENSG00000261840.2|ENSG00000261840.2|0|1148	41	28.6098
ENSG00000197958.12|mRNA|RPL12|ENSG00000197958.12|ENSG00000197958.12|0|2452	40	69.575
ENSG00000110700.6|mRNA|RPS13|ENSG00000110700.6|ENSG00000110700.6|0|2186	38	41.6842
ENSG00000147526.19|mRNA|TACC1|ENSG00000147526.19|ENSG00000147526.19|0|12609	37	62.2973
ENSG00000226310.1|lncRNA|AL022157.1|ENSG00000226310.1|ENSG00000226310.1|0|665	37	54.0811
ENSG00000186468.12|mRNA|RPS23|ENSG00000186468.12|ENSG00000186468.12|0|4204	36	75.5556
ENSG00000189403.14|mRNA|HMGB1|ENSG00000189403.14|ENSG00000189403.14|0|7723	36	32.2778
ENSG00000105993.14|mRNA|DNAJB6|ENSG00000105993.14|ENSG00000105993.14|0|14981	36	74.0833
ENSG00000147677.10|mRNA|EIF3H|ENSG00000147677.10|ENSG00000147677.10|0|6434	35	37.1143
ENSG00000071082.10|mRNA|RPL31|ENSG00000071082.10|ENSG00000071082.10|0|5791	35	76.0857
ENSG00000251513.2|lncRNA|LIX1-AS1|ENSG00000251513.2|ENSG00000251513.2|0|1793	34	64.5882
ENSG00000174738.12|mRNA|NR1D2|ENSG00000174738.12|ENSG00000174738.12|0|5820	34	26.0588
ENSG00000270800.2|mRNA|RPS10-NUDT3|ENSG00000270800.2|ENSG00000270800.2|0|5018	34	71.7353
ENSG00000145741.15|mRNA|BTF3|ENSG00000145741.15|ENSG00000145741.15|0|2467	33	48
ENSG00000145649.7|mRNA|GZMA|ENSG00000145649.7|ENSG00000145649.7|0|894	32	67.3438
ENSG00000104763.18|mRNA|ASAH1|ENSG00000104763.18|ENSG00000104763.18|0|15378	32	61.0938
ENSG00000181061.13|mRNA|HIGD1A|ENSG00000181061.13|ENSG00000181061.13|0|1675	32	37.5312
ENSG00000233927.4|mRNA|RPS28|ENSG00000233927.4|ENSG00000233927.4|0|2119	32	64.25
ENSG00000224137.1|lncRNA|LINC01857|ENSG00000224137.1|ENSG00000224137.1|0|492	32	44.5
ENSG00000231131.6|lncRNA|LINC01468|ENSG00000231131.6|ENSG00000231131.6|0|1177	31	59.4516
ENSG00000100316.15|mRNA|RPL3|ENSG00000100316.15|ENSG00000100316.15|0|4787	30	63.9667
ENSG00000100575.13|mRNA|TIMM9|ENSG00000100575.13|ENSG00000100575.13|0|1500	30	68.3
ENSG00000114391.12|mRNA|RPL24|ENSG00000114391.12|ENSG00000114391.12|0|2682	30	51.5
ENSG00000067167.7|mRNA|TRAM1|ENSG00000067167.7|ENSG00000067167.7|0|3878	30	57.9333
ENSG00000280571.1|mRNA|AC099329.3|ENSG00000280571.1|ENSG00000280571.1|0|602	30	30.9333
ENSG00000117280.12|mRNA|RAB29|ENSG00000117280.12|ENSG00000117280.12|0|3882	29	48.3448
ENSG00000156127.6|mRNA|BATF|ENSG00000156127.6|ENSG00000156127.6|0|980	29	24.3793
ENSG00000136933.16|mRNA|RABEPK|ENSG00000136933.16|ENSG00000136933.16|0|3401	28	56.4286
ENSG00000168118.11|mRNA|RAB4A|ENSG00000168118.11|ENSG00000168118.11|0|3310	28	44.4643
ENSG00000142534.6|mRNA|RPS11|ENSG00000142534.6|ENSG00000142534.6|0|1390	28	69.8929
ENSG00000122026.10|mRNA|RPL21|ENSG00000122026.10|ENSG00000122026.10|0|2249	28	53.6429
ENSG00000079841.18|mRNA|RIMS1|ENSG00000079841.18|ENSG00000079841.18|0|12788	27	27.037
ENSG00000198829.6|mRNA|SUCNR1|ENSG00000198829.6|ENSG00000198829.6|0|4181	27	59.7407
ENSG00000265625.1|lncRNA|AC104564.6|ENSG00000265625.1|ENSG00000265625.1|0|1052	27	33.0741
ENSG00000111144.9|mRNA|LTA4H|ENSG00000111144.9|ENSG00000111144.9|0|7350	27	35.6667
ENSG00000144909.7|mRNA|OSBPL11|ENSG00000144909.7|ENSG00000144909.7|0|4191	27	37.0741
ENSG00000136718.9|mRNA|IMP4|ENSG00000136718.9|ENSG00000136718.9|0|3861	27	58.5556
ENSG00000134333.13|mRNA|LDHA|ENSG00000134333.13|ENSG00000134333.13|0|6210	27	29.4815
ENSG00000173221.13|mRNA|GLRX|ENSG00000173221.13|ENSG00000173221.13|0|6508	27	59.037
ENSG00000151491.12|mRNA|EPS8|ENSG00000151491.12|ENSG00000151491.12|0|6200	27	55.1111
ENSG00000235288.3|lncRNA|AC099329.1|ENSG00000235288.3|ENSG00000235288.3|0|1956	26	37.3077
ENSG00000254877.1|pseudogene|AP001636.2|ENSG00000254877.1|ENSG00000254877.1|0|696	26	41.1154
ENSG00000166681.13|mRNA|BEX3|ENSG00000166681.13|ENSG00000166681.13|0|1080	26	77.8077
ENSG00000185158.12|mRNA|LRRC37B|ENSG00000185158.12|ENSG00000185158.12|0|6281	26	28.5
ENSG00000172673.10|mRNA|THEMIS|ENSG00000172673.10|ENSG00000172673.10|0|4309	25	36.6
ENSG00000125538.11|mRNA|IL1B|ENSG00000125538.11|ENSG00000125538.11|0|3096	25	61.8
ENSG00000117281.15|mRNA|CD160|ENSG00000117281.15|ENSG00000117281.15|0|3971	25	49.28
ENSG00000073756.11|mRNA|PTGS2|ENSG00000073756.11|ENSG00000073756.11|0|5269	24	30.0833
ENSG00000183617.4|mRNA|MRPL54|ENSG00000183617.4|ENSG00000183617.4|0|1003	24	54.4167
ENSG00000073861.2|mRNA|TBX21|ENSG00000073861.2|ENSG00000073861.2|0|2614	24	40.5417
ENSG00000185697.16|mRNA|MYBL1|ENSG00000185697.16|ENSG00000185697.16|0|7239	24	31.125
hsa_circ_0085314|circRNA|hsa_circ_0085314|hsa_circ_0085314|hsa_circ_0085314|0|600	24	35.5833
ENSG00000204387.12|mRNA|C6orf48|ENSG00000204387.12|ENSG00000204387.12|0|1801	23	47.8261
ENSG00000132603.13|mRNA|NIP7|ENSG00000132603.13|ENSG00000132603.13|0|3274	23	49.2174
ENSG00000163682.15|mRNA|RPL9|ENSG00000163682.15|ENSG00000163682.15|0|3259	22	50.4545
ENSG00000050393.11|mRNA|MCUR1|ENSG00000050393.11|ENSG00000050393.11|0|6057	22	39.5455
ENSG00000128989.10|mRNA|ARPP19|ENSG00000128989.10|ENSG00000128989.10|0|6917	22	36.9545
ENSG00000154229.11|mRNA|PRKCA|ENSG00000154229.11|ENSG00000154229.11|0|11152	22	74.8182
hsa_circ_0018889|circRNA|hsa_circ_0018889|hsa_circ_0018889|hsa_circ_0018889|0|558	22	55.6818
ENSG00000084092.6|mRNA|NOA1|ENSG00000084092.6|ENSG00000084092.6|0|3415	22	48.0455
hsa_circ_0006659|circRNA|hsa_circ_0006659|hsa_circ_0006659|hsa_circ_0006659|0|600	22	32.5909
ENSG00000085662.13|mRNA|AKR1B1|ENSG00000085662.13|ENSG00000085662.13|0|3660	22	35.0455
ENSG00000228215.2|lncRNA|AL954650.1|ENSG00000228215.2|ENSG00000228215.2|0|2051	21	56.9524
ENSG00000213145.9|mRNA|CRIP1|ENSG00000213145.9|ENSG00000213145.9|0|2485	21	60.5238
ENSG00000166441.12|mRNA|RPL27A|ENSG00000166441.12|ENSG00000166441.12|0|7193	21	43.7143
ENSG00000248516.1|lncRNA|AC105415.1|ENSG00000248516.1|ENSG00000248516.1|0|1416	21	62.381
ENSG00000170889.13|mRNA|RPS9|ENSG00000170889.13|ENSG00000170889.13|0|4371	21	63.9524
ENSG00000109971.13|mRNA|HSPA8|ENSG00000109971.13|ENSG00000109971.13|0|4849	21	70
ENSG00000165899.10|mRNA|OTOGL|ENSG00000165899.10|ENSG00000165899.10|0|8380	21	57.3333
ENSG00000279605.1|lncRNA|AC067930.6|ENSG00000279605.1|ENSG00000279605.1|0|4947	21	54.5238
ENSG00000161960.14|mRNA|EIF4A1|ENSG00000161960.14|ENSG00000161960.14|0|5316	21	25.4286
ENSG00000132676.15|mRNA|DAP3|ENSG00000132676.15|ENSG00000132676.15|0|4588	21	61.8571
ENSG00000142192.20|mRNA|APP|ENSG00000142192.20|ENSG00000142192.20|0|6316	21	81.5714
ENSG00000101856.9|mRNA|PGRMC1|ENSG00000101856.9|ENSG00000101856.9|0|1919	21	66.2857
ENSG00000105640.12|mRNA|RPL18A|ENSG00000105640.12|ENSG00000105640.12|0|3527	20	76.15
ENSG00000255007.1|lncRNA|LINC02489|ENSG00000255007.1|ENSG00000255007.1|0|354	20	47.9
ENSG00000167645.16|mRNA|YIF1B|ENSG00000167645.16|ENSG00000167645.16|0|3193	20	55.6
ENSG00000166153.16|mRNA|DEPDC4|ENSG00000166153.16|ENSG00000166153.16|0|3118	20	42.8
ENSG00000196776.14|mRNA|CD47|ENSG00000196776.14|ENSG00000196776.14|0|7895	20	66.35
ENSG00000125743.10|mRNA|SNRPD2|ENSG00000125743.10|ENSG00000125743.10|0|1608	20	52.85
ENSG00000165233.17|mRNA|CARD19|ENSG00000165233.17|ENSG00000165233.17|0|3081	20	66.3
ENSG00000096968.13|mRNA|JAK2|ENSG00000096968.13|ENSG00000096968.13|0|6170	20	60.35
ENSG00000232388.4|mRNA|SMIM26|ENSG00000232388.4|ENSG00000232388.4|0|1098	20	57.3
ENSG00000184838.14|mRNA|PRR16|ENSG00000184838.14|ENSG00000184838.14|0|2274	20	52.95
ENSG00000072657.8|mRNA|TRHDE|ENSG00000072657.8|ENSG00000072657.8|0|11950	19	45.8947
ENSG00000152291.13|mRNA|TGOLN2|ENSG00000152291.13|ENSG00000152291.13|0|7081	19	49.6316
ENSG00000196459.13|mRNA|TRAPPC2|ENSG00000196459.13|ENSG00000196459.13|0|6107	19	55.7895
ENSG00000143353.11|mRNA|LYPLAL1|ENSG00000143353.11|ENSG00000143353.11|0|2966	19	26.4211
ENSG00000118181.10|mRNA|RPS25|ENSG00000118181.10|ENSG00000118181.10|0|1477	19	72.2632
ENSG00000269556.7|mRNA|TMEM185A|ENSG00000269556.7|ENSG00000269556.7|0|5158	19	72.6842
ENSG00000197756.9|mRNA|RPL37A|ENSG00000197756.9|ENSG00000197756.9|0|6841	19	72.0526
ENSG00000115461.4|mRNA|IGFBP5|ENSG00000115461.4|ENSG00000115461.4|0|6442	19	29.0526
ENSG00000126756.11|mRNA|UXT|ENSG00000126756.11|ENSG00000126756.11|0|1243	19	59.4211
ENSG00000089157.15|mRNA|RPLP0|ENSG00000089157.15|ENSG00000089157.15|0|4001	19	83.9474
ENSG00000124193.14|mRNA|SRSF6|ENSG00000124193.14|ENSG00000124193.14|0|4593	18	62
ENSG00000149823.8|mRNA|VPS51|ENSG00000149823.8|ENSG00000149823.8|0|4878	18	61.8333
ENSG00000130255.12|mRNA|RPL36|ENSG00000130255.12|ENSG00000130255.12|0|2272	18	60.0556
ENSG00000002586.18|mRNA|CD99|ENSG00000002586.18|ENSG00000002586.18|0|3284	18	47.8333
ENSG00000077312.8|mRNA|SNRPA|ENSG00000077312.8|ENSG00000077312.8|0|2361	18	63.7222
ENSG00000081059.19|mRNA|TCF7|ENSG00000081059.19|ENSG00000081059.19|0|10063	18	57.8889
ENSG00000181481.13|mRNA|RNF135|ENSG00000181481.13|ENSG00000181481.13|0|3580	17	54.3529
ENSG00000258422.5|lncRNA|AL160191.1|ENSG00000258422.5|ENSG00000258422.5|0|1109	17	58.0588
ENSG00000266472.5|mRNA|MRPS21|ENSG00000266472.5|ENSG00000266472.5|0|1641	17	59.0588
ENSG00000116701.14|mRNA|NCF2|ENSG00000116701.14|ENSG00000116701.14|0|2928	17	57.1765
ENSG00000243701.5|lncRNA|DUBR|ENSG00000243701.5|ENSG00000243701.5|0|4206	17	64
ENSG00000161970.12|mRNA|RPL26|ENSG00000161970.12|ENSG00000161970.12|0|2472	16	73.625
hsa_circ_0008158|circRNA|hsa_circ_0008158|hsa_circ_0008158|hsa_circ_0008158|0|600	16	29.375
ENSG00000154518.9|mRNA|ATP5G3|ENSG00000154518.9|ENSG00000154518.9|0|6780	16	48.5
ENSG00000117543.20|mRNA|DPH5|ENSG00000117543.20|ENSG00000117543.20|0|2970	16	60.6875
ENSG00000251399.1|lncRNA|AC092542.1|ENSG00000251399.1|ENSG00000251399.1|0|355	16	62.125
ENSG00000152082.13|mRNA|MZT2B|ENSG00000152082.13|ENSG00000152082.13|0|1815	16	60.6875
ENSG00000167658.15|mRNA|EEF2|ENSG00000167658.15|ENSG00000167658.15|0|4027	16	80.125
ENSG00000187764.11|mRNA|SEMA4D|ENSG00000187764.11|ENSG00000187764.11|0|14160	16	66.1875
ENSG00000257341.5|mRNA|AL928654.4|ENSG00000257341.5|ENSG00000257341.5|0|1408	16	53.5
ENSG00000136942.14|mRNA|RPL35|ENSG00000136942.14|ENSG00000136942.14|0|1535	16	73.125
ENSG00000104921.14|mRNA|FCER2|ENSG00000104921.14|ENSG00000104921.14|0|2451	16	64.125
ENSG00000162636.15|mRNA|FAM102B|ENSG00000162636.15|ENSG00000162636.15|0|9355	16	40.0625
ENSG00000105202.8|mRNA|FBL|ENSG00000105202.8|ENSG00000105202.8|0|2173	16	52.6875
ENSG00000279444.1|lncRNA|AC135584.1|ENSG00000279444.1|ENSG00000279444.1|0|333	16	53.9375
ENSG00000095485.17|mRNA|CWF19L1|ENSG00000095485.17|ENSG00000095485.17|0|3985	16	56.375
ENSG00000198168.8|mRNA|SVIP|ENSG00000198168.8|ENSG00000198168.8|0|5263	15	54.2
ENSG00000100353.17|mRNA|EIF3D|ENSG00000100353.17|ENSG00000100353.17|0|4070	15	47.4667
ENSG00000143622.10|mRNA|RIT1|ENSG00000143622.10|ENSG00000143622.10|0|3919	15	45.3333
ENSG00000143222.11|mRNA|UFC1|ENSG00000143222.11|ENSG00000143222.11|0|2274	15	56
ENSG00000236304.1|lncRNA|AP001189.1|ENSG00000236304.1|ENSG00000236304.1|0|1426	15	42.8667
hsa_circ_0007734|circRNA|hsa_circ_0007734|hsa_circ_0007734|hsa_circ_0007734|0|600	15	18.4
ENSG00000172575.11|mRNA|RASGRP1|ENSG00000172575.11|ENSG00000172575.11|0|6097	15	45.2667
ENSG00000259330.2|mRNA|INAFM2|ENSG00000259330.2|ENSG00000259330.2|0|3052	15	26.8
ENSG00000168961.16|mRNA|LGALS9|ENSG00000168961.16|ENSG00000168961.16|0|5714	15	66.1333
ENSG00000134072.10|mRNA|CAMK1|ENSG00000134072.10|ENSG00000134072.10|0|2720	15	57.8
ENSG00000183726.10|mRNA|TMEM50A|ENSG00000183726.10|ENSG00000183726.10|0|3410	15	49.8
ENSG00000131043.11|mRNA|AAR2|ENSG00000131043.11|ENSG00000131043.11|0|3101	15	59.6
ENSG00000261884.2|mRNA|AC040162.1|ENSG00000261884.2|ENSG00000261884.2|0|5685	14	28.8571
ENSG00000164086.9|mRNA|DUSP7|ENSG00000164086.9|ENSG00000164086.9|0|5648	14	48.3571
hsa_circ_0002474|circRNA|hsa_circ_0002474|hsa_circ_0002474|hsa_circ_0002474|0|600	14	59.6429
ENSG00000261771.5|lncRNA|DNAAF4-CCPG1|ENSG00000261771.5|ENSG00000261771.5|0|4589	14	65.9286
ENSG00000166086.12|mRNA|JAM3|ENSG00000166086.12|ENSG00000166086.12|0|5451	14	69.8571
ENSG00000114023.15|mRNA|FAM162A|ENSG00000114023.15|ENSG00000114023.15|0|3793	14	66
ENSG00000125971.16|mRNA|DYNLRB1|ENSG00000125971.16|ENSG00000125971.16|0|2460	14	72.9286
ENSG00000130811.11|mRNA|EIF3G|ENSG00000130811.11|ENSG00000130811.11|0|3486	14	58.5
ENSG00000086232.12|mRNA|EIF2AK1|ENSG00000086232.12|ENSG00000086232.12|0|5550	14	75.1429
ENSG00000137154.12|mRNA|RPS6|ENSG00000137154.12|ENSG00000137154.12|0|2714	14	74.2857
ENSG00000105568.17|mRNA|PPP2R1A|ENSG00000105568.17|ENSG00000105568.17|0|7437	14	40
hsa_circ_0084021|circRNA|hsa_circ_0084021|hsa_circ_0084021|hsa_circ_0084021|0|294	14	69.5714
ENSG00000120438.11|mRNA|TCP1|ENSG00000120438.11|ENSG00000120438.11|0|4929	14	50.2143
ENSG00000150093.18|mRNA|ITGB1|ENSG00000150093.18|ENSG00000150093.18|0|6011	14	71.9286
ENSG00000170043.11|mRNA|TRAPPC1|ENSG00000170043.11|ENSG00000170043.11|0|1171	13	62.0769
ENSG00000174444.14|mRNA|RPL4|ENSG00000174444.14|ENSG00000174444.14|0|5637	13	82.7692
ENSG00000145723.16|mRNA|GIN1|ENSG00000145723.16|ENSG00000145723.16|0|4182	13	42.9231
ENSG00000263809.1|mRNA|AC135178.2|ENSG00000263809.1|ENSG00000263809.1|0|3087	13	78.4615
ENSG00000084754.10|mRNA|HADHA|ENSG00000084754.10|ENSG00000084754.10|0|3811	13	47.3846
ENSG00000162972.10|mRNA|MAIP1|ENSG00000162972.10|ENSG00000162972.10|0|1624	12	50.75
ENSG00000125952.18|mRNA|MAX|ENSG00000125952.18|ENSG00000125952.18|0|4430	12	60.25
ENSG00000184117.11|mRNA|NIPSNAP1|ENSG00000184117.11|ENSG00000184117.11|0|3067	12	58.9167
ENSG00000148541.12|mRNA|FAM13C|ENSG00000148541.12|ENSG00000148541.12|0|6753	12	37.9167
ENSG00000008083.13|mRNA|JARID2|ENSG00000008083.13|ENSG00000008083.13|0|6015	12	59.6667
ENSG00000072506.12|mRNA|HSD17B10|ENSG00000072506.12|ENSG00000072506.12|0|1115	12	62.5833
ENSG00000182774.10|mRNA|RPS17|ENSG00000182774.10|ENSG00000182774.10|0|3812	12	66.0833
ENSG00000083290.19|mRNA|ULK2|ENSG00000083290.19|ENSG00000083290.19|0|9843	12	53.4167
ENSG00000267009.6|lncRNA|AC007780.1|ENSG00000267009.6|ENSG00000267009.6|0|1863	12	58.3333
ENSG00000138795.9|mRNA|LEF1|ENSG00000138795.9|ENSG00000138795.9|0|5361	12	63.5833
ENSG00000112667.12|mRNA|DNPH1|ENSG00000112667.12|ENSG00000112667.12|0|1250	12	58
ENSG00000112893.9|mRNA|MAN2A1|ENSG00000112893.9|ENSG00000112893.9|0|11815	11	54.2727
ENSG00000115268.9|mRNA|RPS15|ENSG00000115268.9|ENSG00000115268.9|0|2137	11	81.2727
ENSG00000168615.11|mRNA|ADAM9|ENSG00000168615.11|ENSG00000168615.11|0|6913	11	81.0909
ENSG00000068796.16|mRNA|KIF2A|ENSG00000068796.16|ENSG00000068796.16|0|4774	11	54.5455
ENSG00000171204.12|mRNA|TMEM126B|ENSG00000171204.12|ENSG00000171204.12|0|2416	11	62.6364
ENSG00000253355.1|lncRNA|AP003469.1|ENSG00000253355.1|ENSG00000253355.1|0|602	11	60.3636
ENSG00000142676.12|mRNA|RPL11|ENSG00000142676.12|ENSG00000142676.12|0|1987	11	47.7273
ENSG00000204628.11|mRNA|RACK1|ENSG00000204628.11|ENSG00000204628.11|0|5990	11	51.2727
ENSG00000187514.16|mRNA|PTMA|ENSG00000187514.16|ENSG00000187514.16|0|3378	11	40.9091
ENSG00000035403.17|mRNA|VCL|ENSG00000035403.17|ENSG00000035403.17|0|9992	11	72.6364
ENSG00000156171.14|mRNA|DRAM2|ENSG00000156171.14|ENSG00000156171.14|0|3138	11	76.7273
ENSG00000148484.17|mRNA|RSU1|ENSG00000148484.17|ENSG00000148484.17|0|4191	11	65.7273
ENSG00000005249.12|mRNA|PRKAR2B|ENSG00000005249.12|ENSG00000005249.12|0|4318	10	86.2
ENSG00000260916.7|mRNA|CCPG1|ENSG00000260916.7|ENSG00000260916.7|0|8790	10	86.3
ENSG00000115085.13|mRNA|ZAP70|ENSG00000115085.13|ENSG00000115085.13|0|5111	10	52.4
ENSG00000009780.15|mRNA|FAM76A|ENSG00000009780.15|ENSG00000009780.15|0|4034	10	49.1
ENSG00000156265.15|mRNA|MAP3K7CL|ENSG00000156265.15|ENSG00000156265.15|0|4497	10	69.3
hsa_circ_0001789|circRNA|hsa_circ_0001789|hsa_circ_0001789|hsa_circ_0001789|0|600	10	55.9
ENSG00000196154.11|mRNA|S100A4|ENSG00000196154.11|ENSG00000196154.11|0|1025	10	34.1
ENSG00000184602.5|mRNA|SNN|ENSG00000184602.5|ENSG00000184602.5|0|3312	10	54.8
ENSG00000130741.10|mRNA|EIF2S3|ENSG00000130741.10|ENSG00000130741.10|0|3472	10	72.6
ENSG00000108106.13|mRNA|UBE2S|ENSG00000108106.13|ENSG00000108106.13|0|2788	10	63.4
ENSG00000245281.6|lncRNA|AC124242.1|ENSG00000245281.6|ENSG00000245281.6|0|1834	10	27.7
ENSG00000141101.12|mRNA|NOB1|ENSG00000141101.12|ENSG00000141101.12|0|2119	10	67.2
ENSG00000184500.14|mRNA|PROS1|ENSG00000184500.14|ENSG00000184500.14|0|4429	10	83
ENSG00000108961.13|mRNA|RANGRF|ENSG00000108961.13|ENSG00000108961.13|0|1577	10	70.1
ENSG00000182899.14|mRNA|RPL35A|ENSG00000182899.14|ENSG00000182899.14|0|2977	10	69.6
ENSG00000138378.17|mRNA|STAT4|ENSG00000138378.17|ENSG00000138378.17|0|4250	10	47.9
ENSG00000167414.4|mRNA|GNG8|ENSG00000167414.4|ENSG00000167414.4|0|216	10	34.6
ENSG00000196611.4|mRNA|MMP1|ENSG00000196611.4|ENSG00000196611.4|0|1970	9	32.1111
ENSG00000198964.13|mRNA|SGMS1|ENSG00000198964.13|ENSG00000198964.13|0|6429	9	70.7778
ENSG00000146066.2|mRNA|HIGD2A|ENSG00000146066.2|ENSG00000146066.2|0|668	9	67.8889
ENSG00000267787.5|lncRNA|AC027097.2|ENSG00000267787.5|ENSG00000267787.5|0|2032	9	28
ENSG00000107679.14|mRNA|PLEKHA1|ENSG00000107679.14|ENSG00000107679.14|0|23986	9	87.8889
ENSG00000150637.8|mRNA|CD226|ENSG00000150637.8|ENSG00000150637.8|0|13638	9	66.2222
ENSG00000181038.13|mRNA|METTL23|ENSG00000181038.13|ENSG00000181038.13|0|1914	9	78.4444
ENSG00000255079.1|lncRNA|AC104241.2|ENSG00000255079.1|ENSG00000255079.1|0|789	9	60.5556
ENSG00000141428.16|mRNA|C18orf21|ENSG00000141428.16|ENSG00000141428.16|0|2158	9	77.8889
ENSG00000145703.15|mRNA|IQGAP2|ENSG00000145703.15|ENSG00000145703.15|0|7904	9	52.3333
ENSG00000184702.18|mRNA|SEPT5|ENSG00000184702.18|ENSG00000184702.18|0|5914	9	77.8889
ENSG00000110777.11|mRNA|POU2AF1|ENSG00000110777.11|ENSG00000110777.11|0|7416	9	65.1111
ENSG00000005020.12|mRNA|SKAP2|ENSG00000005020.12|ENSG00000005020.12|0|5520	9	57
ENSG00000105373.18|mRNA|NOP53|ENSG00000105373.18|ENSG00000105373.18|0|5341	9	76.6667
ENSG00000069399.14|mRNA|BCL3|ENSG00000069399.14|ENSG00000069399.14|0|3242	9	61.1111
ENSG00000113552.15|mRNA|GNPDA1|ENSG00000113552.15|ENSG00000113552.15|0|3961	9	49.7778
ENSG00000120727.12|mRNA|PAIP2|ENSG00000120727.12|ENSG00000120727.12|0|3158	9	55.3333
ENSG00000169429.10|mRNA|CXCL8|ENSG00000169429.10|ENSG00000169429.10|0|2274	9	24.4444
ENSG00000115289.13|mRNA|PCGF1|ENSG00000115289.13|ENSG00000115289.13|0|2629	9	56.4444
ENSG00000106868.16|mRNA|SUSD1|ENSG00000106868.16|ENSG00000106868.16|0|4183	9	70.3333
ENSG00000235162.8|mRNA|C12orf75|ENSG00000235162.8|ENSG00000235162.8|0|2693	9	53.2222
ENSG00000111796.3|mRNA|KLRB1|ENSG00000111796.3|ENSG00000111796.3|0|1448	9	21.8889
ENSG00000147604.13|mRNA|RPL7|ENSG00000147604.13|ENSG00000147604.13|0|2907	9	70.4444
ENSG00000172159.15|mRNA|FRMD3|ENSG00000172159.15|ENSG00000172159.15|0|6486	8	45.125
ENSG00000271503.5|mRNA|CCL5|ENSG00000271503.5|ENSG00000271503.5|0|1512	8	72
hsa_circ_0063707|circRNA|hsa_circ_0063707|hsa_circ_0063707|hsa_circ_0063707|0|528	8	33
ENSG00000151276.23|mRNA|MAGI1|ENSG00000151276.23|ENSG00000151276.23|0|11649	8	46.375
ENSG00000234961.1|lncRNA|AL133415.1|ENSG00000234961.1|ENSG00000234961.1|0|706	8	65.5
ENSG00000148655.14|mRNA|LRMDA|ENSG00000148655.14|ENSG00000148655.14|0|6560	8	25.375
ENSG00000169756.16|mRNA|LIMS1|ENSG00000169756.16|ENSG00000169756.16|0|7771	8	67.625
ENSG00000198380.12|mRNA|GFPT1|ENSG00000198380.12|ENSG00000198380.12|0|8866	8	73
ENSG00000173852.14|mRNA|DPY19L1|ENSG00000173852.14|ENSG00000173852.14|0|6278	8	59.5
ENSG00000177954.11|mRNA|RPS27|ENSG00000177954.11|ENSG00000177954.11|0|946	8	82.375
ENSG00000138411.10|mRNA|HECW2|ENSG00000138411.10|ENSG00000138411.10|0|12692	8	59.875
hsa_circ_0007798|circRNA|hsa_circ_0007798|hsa_circ_0007798|hsa_circ_0007798|0|600	8	45.5
ENSG00000131495.8|mRNA|NDUFA2|ENSG00000131495.8|ENSG00000131495.8|0|1488	8	65.25
ENSG00000108846.15|mRNA|ABCC3|ENSG00000108846.15|ENSG00000108846.15|0|9614	8	77.375
ENSG00000214517.9|mRNA|PPME1|ENSG00000214517.9|ENSG00000214517.9|0|7917	8	51.875
ENSG00000081923.11|mRNA|ATP8B1|ENSG00000081923.11|ENSG00000081923.11|0|6652	8	54.25
ENSG00000140264.19|mRNA|SERF2|ENSG00000140264.19|ENSG00000140264.19|0|7347	8	43.25
ENSG00000101335.9|mRNA|MYL9|ENSG00000101335.9|ENSG00000101335.9|0|2821	8	36.5
ENSG00000125676.19|mRNA|THOC2|ENSG00000125676.19|ENSG00000125676.19|0|10277	8	64.5
ENSG00000090447.11|mRNA|TFAP4|ENSG00000090447.11|ENSG00000090447.11|0|7867	8	36.75
ENSG00000206567.9|lncRNA|AC022007.1|ENSG00000206567.9|ENSG00000206567.9|0|2533	8	32.375
hsa_circ_0003356|circRNA|hsa_circ_0003356|hsa_circ_0003356|hsa_circ_0003356|0|540	8	15.375
ENSG00000184220.11|mRNA|CMSS1|ENSG00000184220.11|ENSG00000184220.11|0|7210	8	48.625
ENSG00000162639.15|mRNA|HENMT1|ENSG00000162639.15|ENSG00000162639.15|0|2426	8	59.625
ENSG00000214827.9|mRNA|MTCP1|ENSG00000214827.9|ENSG00000214827.9|0|2990	7	52.2857
ENSG00000273149.1|lncRNA|AL138963.3|ENSG00000273149.1|ENSG00000273149.1|0|588	7	89.4286
ENSG00000143947.13|mRNA|RPS27A|ENSG00000143947.13|ENSG00000143947.13|0|3130	7	84.4286
ENSG00000064601.16|mRNA|CTSA|ENSG00000064601.16|ENSG00000064601.16|0|5856	7	83.5714
ENSG00000132122.11|mRNA|SPATA6|ENSG00000132122.11|ENSG00000132122.11|0|5939	7	49.4286
ENSG00000214113.10|mRNA|LYRM4|ENSG00000214113.10|ENSG00000214113.10|0|9443	7	46.7143
ENSG00000225972.1|pseudogene|MTND1P23|ENSG00000225972.1|ENSG00000225972.1|0|372	7	17.2857
ENSG00000135605.12|mRNA|TEC|ENSG00000135605.12|ENSG00000135605.12|0|4030	7	32.4286
ENSG00000184613.10|mRNA|NELL2|ENSG00000184613.10|ENSG00000184613.10|0|6424	7	40.8571
ENSG00000173272.15|mRNA|MZT2A|ENSG00000173272.15|ENSG00000173272.15|0|4093	7	72.1429
ENSG00000174748.18|mRNA|RPL15|ENSG00000174748.18|ENSG00000174748.18|0|6528	7	82.2857
hsa_circ_0006761|circRNA|hsa_circ_0006761|hsa_circ_0006761|hsa_circ_0006761|0|600	7	25.4286
hsa_circ_0047552|circRNA|hsa_circ_0047552|hsa_circ_0047552|hsa_circ_0047552|0|600	7	26
ENSG00000239445.5|lncRNA|ST3GAL6-AS1|ENSG00000239445.5|ENSG00000239445.5|0|843	7	25
hsa_circ_0047922|circRNA|hsa_circ_0047922|hsa_circ_0047922|hsa_circ_0047922|0|600	7	44.8571
ENSG00000152348.15|mRNA|ATG10|ENSG00000152348.15|ENSG00000152348.15|0|5449	7	63.2857
ENSG00000186298.11|mRNA|PPP1CC|ENSG00000186298.11|ENSG00000186298.11|0|6906	7	57.2857
ENSG00000164741.14|mRNA|DLC1|ENSG00000164741.14|ENSG00000164741.14|0|12794	7	67.5714
hsa_circ_0003029|circRNA|hsa_circ_0003029|hsa_circ_0003029|hsa_circ_0003029|0|600	7	72.8571
ENSG00000166886.12|mRNA|NAB2|ENSG00000166886.12|ENSG00000166886.12|0|3010	7	37
ENSG00000105671.11|mRNA|DDX49|ENSG00000105671.11|ENSG00000105671.11|0|2780	7	31.1429
ENSG00000182712.15|mRNA|CMC4|ENSG00000182712.15|ENSG00000182712.15|0|1539	7	53.7143
ENSG00000163931.15|mRNA|TKT|ENSG00000163931.15|ENSG00000163931.15|0|9507	7	31.1429
ENSG00000102879.15|mRNA|CORO1A|ENSG00000102879.15|ENSG00000102879.15|0|4871	7	35.7143
ENSG00000184178.15|mRNA|SCFD2|ENSG00000184178.15|ENSG00000184178.15|0|3185	7	56
hsa_circ_0000027|circRNA|hsa_circ_0000027|hsa_circ_0000027|hsa_circ_0000027|0|600	7	59.4286
ENSG00000283164.1|lncRNA|AC012507.4|ENSG00000283164.1|ENSG00000283164.1|0|504	7	69.5714
ENSG00000130159.13|mRNA|ECSIT|ENSG00000130159.13|ENSG00000130159.13|0|2370	6	69.5
ENSG00000164346.9|mRNA|NSA2|ENSG00000164346.9|ENSG00000164346.9|0|4962	6	72.8333
ENSG00000183401.11|mRNA|CCDC159|ENSG00000183401.11|ENSG00000183401.11|0|4064	6	29
hsa_circ_0008234|circRNA|hsa_circ_0008234|hsa_circ_0008234|hsa_circ_0008234|0|600	6	55.5
ENSG00000139343.10|mRNA|SNRPF|ENSG00000139343.10|ENSG00000139343.10|0|3043	6	48
ENSG00000139318.7|mRNA|DUSP6|ENSG00000139318.7|ENSG00000139318.7|0|4632	6	29.6667
ENSG00000174917.8|mRNA|C19orf70|ENSG00000174917.8|ENSG00000174917.8|0|1854	6	65.8333
ENSG00000276409.4|mRNA|CCL14|ENSG00000276409.4|ENSG00000276409.4|0|3269	6	55.8333
ENSG00000109814.11|mRNA|UGDH|ENSG00000109814.11|ENSG00000109814.11|0|4045	6	59.6667
ENSG00000107829.13|mRNA|FBXW4|ENSG00000107829.13|ENSG00000107829.13|0|5038	6	47.8333
ENSG00000251636.1|lncRNA|LINC01218|ENSG00000251636.1|ENSG00000251636.1|0|481	6	35
ENSG00000223482.7|lncRNA|NUTM2A-AS1|ENSG00000223482.7|ENSG00000223482.7|0|6851	6	37.6667
ENSG00000131725.13|mRNA|WDR44|ENSG00000131725.13|ENSG00000131725.13|0|4202	6	68.6667
ENSG00000138430.15|mRNA|OLA1|ENSG00000138430.15|ENSG00000138430.15|0|6100	6	52.3333
ENSG00000173905.8|mRNA|GOLIM4|ENSG00000173905.8|ENSG00000173905.8|0|4647	6	45.5
ENSG00000249209.2|mRNA|AP000311.1|ENSG00000249209.2|ENSG00000249209.2|0|1078	6	75.5
ENSG00000229647.1|lncRNA|MYOSLID|ENSG00000229647.1|ENSG00000229647.1|0|1204	6	71.6667
ENSG00000231725.1|pseudogene|VN1R110P|ENSG00000231725.1|ENSG00000231725.1|0|971	6	43.8333
ENSG00000173113.6|mRNA|TRMT112|ENSG00000173113.6|ENSG00000173113.6|0|1625	6	52.8333
ENSG00000102401.19|mRNA|ARMCX3|ENSG00000102401.19|ENSG00000102401.19|0|4239	6	64.1667
ENSG00000236411.1|pseudogene|NDUFAF4P3|ENSG00000236411.1|ENSG00000236411.1|0|525	6	35.3333
ENSG00000171858.17|mRNA|RPS21|ENSG00000171858.17|ENSG00000171858.17|0|1023	6	86.6667
ENSG00000136156.12|mRNA|ITM2B|ENSG00000136156.12|ENSG00000136156.12|0|10210	6	79.1667
ENSG00000135749.18|mRNA|PCNX2|ENSG00000135749.18|ENSG00000135749.18|0|13815	6	50.1667
hsa_circ_0007265|circRNA|hsa_circ_0007265|hsa_circ_0007265|hsa_circ_0007265|0|600	6	44.1667
ENSG00000120885.21|mRNA|CLU|ENSG00000120885.21|ENSG00000120885.21|0|6616	6	75.1667
ENSG00000214212.8|mRNA|C19orf38|ENSG00000214212.8|ENSG00000214212.8|0|1565	6	69.3333
ENSG00000145592.13|mRNA|RPL37|ENSG00000145592.13|ENSG00000145592.13|0|8153	6	86.6667
ENSG00000063438.16|mRNA|AHRR|ENSG00000063438.16|ENSG00000063438.16|0|7678	6	63
ENSG00000147649.9|mRNA|MTDH|ENSG00000147649.9|ENSG00000147649.9|0|6391	6	36.6667
ENSG00000198918.7|mRNA|RPL39|ENSG00000198918.7|ENSG00000198918.7|0|2141	6	84
ENSG00000197442.9|mRNA|MAP3K5|ENSG00000197442.9|ENSG00000197442.9|0|5303	6	70.1667
ENSG00000269469.1|mRNA|AC010619.1|ENSG00000269469.1|ENSG00000269469.1|0|675	6	65.3333
ENSG00000152061.23|mRNA|RABGAP1L|ENSG00000152061.23|ENSG00000152061.23|0|16071	6	52.5
ENSG00000147123.10|mRNA|NDUFB11|ENSG00000147123.10|ENSG00000147123.10|0|1418	6	71.5
ENSG00000152601.17|mRNA|MBNL1|ENSG00000152601.17|ENSG00000152601.17|0|9989	6	77
ENSG00000196683.10|mRNA|TOMM7|ENSG00000196683.10|ENSG00000196683.10|0|1751	6	62.1667
ENSG00000162373.12|mRNA|BEND5|ENSG00000162373.12|ENSG00000162373.12|0|2138	6	66.6667
ENSG00000116898.11|mRNA|MRPS15|ENSG00000116898.11|ENSG00000116898.11|0|2916	6	44.5
ENSG00000156482.10|mRNA|RPL30|ENSG00000156482.10|ENSG00000156482.10|0|4027	6	66.3333
hsa_circ_0002780|circRNA|hsa_circ_0002780|hsa_circ_0002780|hsa_circ_0002780|0|520	6	60.1667
ENSG00000159111.12|mRNA|MRPL10|ENSG00000159111.12|ENSG00000159111.12|0|2764	6	81.5
ENSG00000155465.18|mRNA|SLC7A7|ENSG00000155465.18|ENSG00000155465.18|0|5131	6	42.5
ENSG00000197353.3|mRNA|LYPD2|ENSG00000197353.3|ENSG00000197353.3|0|594	6	20
ENSG00000087302.8|mRNA|C14orf166|ENSG00000087302.8|ENSG00000087302.8|0|8323	6	67.1667
ENSG00000115523.16|mRNA|GNLY|ENSG00000115523.16|ENSG00000115523.16|0|3051	6	43
ENSG00000159348.12|mRNA|CYB5R1|ENSG00000159348.12|ENSG00000159348.12|0|4504	6	70.5
ENSG00000125991.19|mRNA|ERGIC3|ENSG00000125991.19|ENSG00000125991.19|0|6012	6	21.1667
ENSG00000212224.1|snoRNA|SNORA26|ENSG00000212224.1|ENSG00000212224.1|0|122	6	57.5
ENSG00000197894.10|mRNA|ADH5|ENSG00000197894.10|ENSG00000197894.10|0|4866	5	63.4
ENSG00000150045.11|mRNA|KLRF1|ENSG00000150045.11|ENSG00000150045.11|0|1260	5	62.4
ENSG00000071051.13|mRNA|NCK2|ENSG00000071051.13|ENSG00000071051.13|0|2990	5	61.8
ENSG00000064703.11|mRNA|DDX20|ENSG00000064703.11|ENSG00000064703.11|0|6019	5	70
ENSG00000074370.17|mRNA|ATP2A3|ENSG00000074370.17|ENSG00000074370.17|0|6893	5	69.4
ENSG00000173542.8|mRNA|MOB1B|ENSG00000173542.8|ENSG00000173542.8|0|8801	5	63
ENSG00000081189.15|mRNA|MEF2C|ENSG00000081189.15|ENSG00000081189.15|0|11755	5	77
ENSG00000085733.15|mRNA|CTTN|ENSG00000085733.15|ENSG00000085733.15|0|6949	5	78.8
ENSG00000198851.9|mRNA|CD3E|ENSG00000198851.9|ENSG00000198851.9|0|2844	5	64.2
ENSG00000149798.4|mRNA|CDC42EP2|ENSG00000149798.4|ENSG00000149798.4|0|2224	5	61.8
ENSG00000184924.5|mRNA|PTRHD1|ENSG00000184924.5|ENSG00000184924.5|0|1917	5	83.4
ENSG00000185989.10|mRNA|RASA3|ENSG00000185989.10|ENSG00000185989.10|0|4763	5	67
ENSG00000178732.5|mRNA|GP5|ENSG00000178732.5|ENSG00000178732.5|0|3534	5	59
ENSG00000151151.5|mRNA|IPMK|ENSG00000151151.5|ENSG00000151151.5|0|6133	5	59.8
ENSG00000217555.12|mRNA|CKLF|ENSG00000217555.12|ENSG00000217555.12|0|1161	5	73.4
ENSG00000227550.2|pseudogene|TRBV7-5|ENSG00000227550.2|ENSG00000227550.2|0|345	5	58.6
ENSG00000167632.14|mRNA|TRAPPC9|ENSG00000167632.14|ENSG00000167632.14|0|7055	5	74.6
ENSG00000213625.8|mRNA|LEPROT|ENSG00000213625.8|ENSG00000213625.8|0|5237	5	66.8
ENSG00000207496.1|snoRNA|SNORA7A|ENSG00000207496.1|ENSG00000207496.1|0|139	5	65.6
ENSG00000138758.11|mRNA|SEPT11|ENSG00000138758.11|ENSG00000138758.11|0|9787	5	65
ENSG00000159713.10|mRNA|TPPP3|ENSG00000159713.10|ENSG00000159713.10|0|2618	5	59.2
ENSG00000070761.7|mRNA|CFAP20|ENSG00000070761.7|ENSG00000070761.7|0|2375	5	59
ENSG00000139133.6|mRNA|ALG10|ENSG00000139133.6|ENSG00000139133.6|0|4389	5	60
ENSG00000156642.16|mRNA|NPTN|ENSG00000156642.16|ENSG00000156642.16|0|4032	5	78.4
ENSG00000220201.7|mRNA|ZGLP1|ENSG00000220201.7|ENSG00000220201.7|0|2431	5	59.2
ENSG00000170836.11|mRNA|PPM1D|ENSG00000170836.11|ENSG00000170836.11|0|5044	5	57.2
ENSG00000258418.1|lncRNA|AL352977.1|ENSG00000258418.1|ENSG00000258418.1|0|453	5	41
ENSG00000122545.18|mRNA|SEPT7|ENSG00000122545.18|ENSG00000122545.18|0|10906	5	63.6
ENSG00000101138.11|mRNA|CSTF1|ENSG00000101138.11|ENSG00000101138.11|0|4800	5	45.4
ENSG00000251259.1|lncRNA|AC004069.1|ENSG00000251259.1|ENSG00000251259.1|0|549	5	78.8
ENSG00000115484.14|mRNA|CCT4|ENSG00000115484.14|ENSG00000115484.14|0|2830	5	69.2
ENSG00000115652.14|mRNA|UXS1|ENSG00000115652.14|ENSG00000115652.14|0|7023	5	25.6
ENSG00000116514.16|mRNA|RNF19B|ENSG00000116514.16|ENSG00000116514.16|0|2610	5	75.2
ENSG00000116678.19|mRNA|LEPR|ENSG00000116678.19|ENSG00000116678.19|0|11370	5	32.4
ENSG00000250479.8|mRNA|CHCHD10|ENSG00000250479.8|ENSG00000250479.8|0|1360	5	65.4
ENSG00000117226.11|mRNA|GBP3|ENSG00000117226.11|ENSG00000117226.11|0|4297	5	59.2
ENSG00000111341.9|mRNA|MGP|ENSG00000111341.9|ENSG00000111341.9|0|2639	5	59.8
ENSG00000133818.13|mRNA|RRAS2|ENSG00000133818.13|ENSG00000133818.13|0|3453	5	15.4
ENSG00000119242.8|mRNA|CCDC92|ENSG00000119242.8|ENSG00000119242.8|0|8223	5	54.6
ENSG00000008988.9|mRNA|RPS20|ENSG00000008988.9|ENSG00000008988.9|0|3002	5	89
ENSG00000280227.1|lncRNA|AC079416.3|ENSG00000280227.1|ENSG00000280227.1|0|549	5	43.6
ENSG00000122643.18|mRNA|NT5C3A|ENSG00000122643.18|ENSG00000122643.18|0|3493	5	46.8
ENSG00000257815.5|lncRNA|LINC01481|ENSG00000257815.5|ENSG00000257815.5|0|1490	5	41
ENSG00000012124.16|mRNA|CD22|ENSG00000012124.16|ENSG00000012124.16|0|6159	5	68.4
ENSG00000135002.11|mRNA|RFK|ENSG00000135002.11|ENSG00000135002.11|0|3877	5	61.2
ENSG00000105819.13|mRNA|PMPCB|ENSG00000105819.13|ENSG00000105819.13|0|4835	5	67.2
ENSG00000272573.5|mRNA|MUSTN1|ENSG00000272573.5|ENSG00000272573.5|0|902	4	22.25
ENSG00000154146.12|mRNA|NRGN|ENSG00000154146.12|ENSG00000154146.12|0|1309	4	72.5
ENSG00000087206.16|mRNA|UIMC1|ENSG00000087206.16|ENSG00000087206.16|0|4739	4	90.75
ENSG00000115207.13|mRNA|GTF3C2|ENSG00000115207.13|ENSG00000115207.13|0|5839	4	23
ENSG00000159377.10|mRNA|PSMB4|ENSG00000159377.10|ENSG00000159377.10|0|2158	4	46.75
ENSG00000205571.13|mRNA|SMN2|ENSG00000205571.13|ENSG00000205571.13|0|3011	4	41.25
ENSG00000265491.4|mRNA|RNF115|ENSG00000265491.4|ENSG00000265491.4|0|11041	4	73.75
ENSG00000204356.13|mRNA|NELFE|ENSG00000204356.13|ENSG00000204356.13|0|2719	4	54.75
ENSG00000153879.8|mRNA|CEBPG|ENSG00000153879.8|ENSG00000153879.8|0|4411	4	40.75
ENSG00000275688.4|mRNA|CCL15-CCL14|ENSG00000275688.4|ENSG00000275688.4|0|1047	4	51.5
ENSG00000146963.17|mRNA|LUC7L2|ENSG00000146963.17|ENSG00000146963.17|0|6316	4	47.5
ENSG00000153707.16|mRNA|PTPRD|ENSG00000153707.16|ENSG00000153707.16|0|11165	4	59.25
ENSG00000117640.17|mRNA|MTFR1L|ENSG00000117640.17|ENSG00000117640.17|0|5817	4	44.5
ENSG00000010278.12|mRNA|CD9|ENSG00000010278.12|ENSG00000010278.12|0|3299	4	61.5
ENSG00000118855.18|mRNA|MFSD1|ENSG00000118855.18|ENSG00000118855.18|0|5288	4	81
ENSG00000197969.11|mRNA|VPS13A|ENSG00000197969.11|ENSG00000197969.11|0|20196	4	57.25
ENSG00000272398.5|mRNA|CD24|ENSG00000272398.5|ENSG00000272398.5|0|3097	4	47.75
ENSG00000185825.15|mRNA|BCAP31|ENSG00000185825.15|ENSG00000185825.15|0|2624	4	89
ENSG00000280195.1|lncRNA|AC245140.2|ENSG00000280195.1|ENSG00000280195.1|0|1939	4	71.25
ENSG00000121552.3|mRNA|CSTA|ENSG00000121552.3|ENSG00000121552.3|0|1373	4	29.5
ENSG00000185963.13|mRNA|BICD2|ENSG00000185963.13|ENSG00000185963.13|0|6427	4	79
ENSG00000154188.9|mRNA|ANGPT1|ENSG00000154188.9|ENSG00000154188.9|0|7128	4	53.5
ENSG00000114503.10|mRNA|NCBP2|ENSG00000114503.10|ENSG00000114503.10|0|5114	4	53.25
ENSG00000179399.14|mRNA|GPC5|ENSG00000179399.14|ENSG00000179399.14|0|3544	4	61.25
ENSG00000169946.13|mRNA|ZFPM2|ENSG00000169946.13|ENSG00000169946.13|0|7775	4	51.25
hsa_circ_0084119|circRNA|hsa_circ_0084119|hsa_circ_0084119|hsa_circ_0084119|0|600	4	45.25
ENSG00000169627.7|mRNA|BOLA2B|ENSG00000169627.7|ENSG00000169627.7|0|1365	4	59.25
ENSG00000169442.8|mRNA|CD52|ENSG00000169442.8|ENSG00000169442.8|0|935	4	40.75
ENSG00000172340.14|mRNA|SUCLG2|ENSG00000172340.14|ENSG00000172340.14|0|3090	4	45.75
ENSG00000075415.12|mRNA|SLC25A3|ENSG00000075415.12|ENSG00000075415.12|0|8896	4	58.5
ENSG00000167641.10|mRNA|PPP1R14A|ENSG00000167641.10|ENSG00000167641.10|0|1501	4	32.75
ENSG00000075651.15|mRNA|PLD1|ENSG00000075651.15|ENSG00000075651.15|0|12859	4	58
hsa_circ_0034825|circRNA|hsa_circ_0034825|hsa_circ_0034825|hsa_circ_0034825|0|600	4	47.5
ENSG00000166710.17|mRNA|B2M|ENSG00000166710.17|ENSG00000166710.17|0|6089	4	52
ENSG00000108953.16|mRNA|YWHAE|ENSG00000108953.16|ENSG00000108953.16|0|3847	4	47
ENSG00000166340.15|mRNA|TPP1|ENSG00000166340.15|ENSG00000166340.15|0|4901	4	81.75
ENSG00000177030.16|mRNA|DEAF1|ENSG00000177030.16|ENSG00000177030.16|0|4452	4	59.75
ENSG00000078668.13|mRNA|VDAC3|ENSG00000078668.13|ENSG00000078668.13|0|3141	4	69.75
ENSG00000180628.14|mRNA|PCGF5|ENSG00000180628.14|ENSG00000180628.14|0|8306	4	57
ENSG00000126749.14|mRNA|EMG1|ENSG00000126749.14|ENSG00000126749.14|0|5600	4	44.75
ENSG00000079102.16|mRNA|RUNX1T1|ENSG00000079102.16|ENSG00000079102.16|0|13535	4	59.5
ENSG00000164713.9|mRNA|BRI3|ENSG00000164713.9|ENSG00000164713.9|0|5139	4	64.5
ENSG00000164332.7|mRNA|UBLCP1|ENSG00000164332.7|ENSG00000164332.7|0|2676	4	35.25
ENSG00000102030.15|mRNA|NAA10|ENSG00000102030.15|ENSG00000102030.15|0|4742	4	67.75
ENSG00000101444.12|mRNA|AHCY|ENSG00000101444.12|ENSG00000101444.12|0|3894	4	47.75
ENSG00000183527.11|mRNA|PSMG1|ENSG00000183527.11|ENSG00000183527.11|0|2515	4	27.25
ENSG00000183978.7|mRNA|COA3|ENSG00000183978.7|ENSG00000183978.7|0|1922	4	69
ENSG00000111639.7|mRNA|MRPL51|ENSG00000111639.7|ENSG00000111639.7|0|1551	4	37.75
hsa_circ_0007848|circRNA|hsa_circ_0007848|hsa_circ_0007848|hsa_circ_0007848|0|600	4	62.75
ENSG00000112679.14|mRNA|DUSP22|ENSG00000112679.14|ENSG00000112679.14|0|5686	4	37.75
ENSG00000112799.8|mRNA|LY86|ENSG00000112799.8|ENSG00000112799.8|0|1254	4	47.75
ENSG00000113272.13|mRNA|THG1L|ENSG00000113272.13|ENSG00000113272.13|0|3220	4	53
ENSG00000113558.18|mRNA|SKP1|ENSG00000113558.18|ENSG00000113558.18|0|12771	4	46
ENSG00000162614.18|mRNA|NEXN|ENSG00000162614.18|ENSG00000162614.18|0|4436	4	72.25
hsa_circ_0006388|circRNA|hsa_circ_0006388|hsa_circ_0006388|hsa_circ_0006388|0|600	4	45
hsa_circ_0089902|circRNA|hsa_circ_0089902|hsa_circ_0089902|hsa_circ_0089902|0|600	4	56.25
ENSG00000137054.15|mRNA|POLR1E|ENSG00000137054.15|ENSG00000137054.15|0|2512	4	77.75
ENSG00000140740.10|mRNA|UQCRC2|ENSG00000140740.10|ENSG00000140740.10|0|5217	4	45.75
ENSG00000140374.15|mRNA|ETFA|ENSG00000140374.15|ENSG00000140374.15|0|5031	4	79
ENSG00000215277.8|mRNA|RNF212B|ENSG00000215277.8|ENSG00000215277.8|0|2059	4	54.25
ENSG00000220804.8|pseudogene|LINC01881|ENSG00000220804.8|ENSG00000220804.8|0|1931	4	60.75
ENSG00000142684.8|mRNA|ZNF593|ENSG00000142684.8|ENSG00000142684.8|0|769	4	89.25
ENSG00000142867.12|mRNA|BCL10|ENSG00000142867.12|ENSG00000142867.12|0|2819	4	58
ENSG00000056972.18|mRNA|TRAF3IP2|ENSG00000056972.18|ENSG00000056972.18|0|6553	4	56.5
ENSG00000230749.4|lncRNA|MEIS1-AS2|ENSG00000230749.4|ENSG00000230749.4|0|1029	4	30
ENSG00000059377.16|mRNA|TBXAS1|ENSG00000059377.16|ENSG00000059377.16|0|6200	4	57.25
ENSG00000215039.6|lncRNA|CD27-AS1|ENSG00000215039.6|ENSG00000215039.6|0|3411	4	72.75
ENSG00000215021.8|mRNA|PHB2|ENSG00000215021.8|ENSG00000215021.8|0|2499	4	34
ENSG00000129353.14|mRNA|SLC44A2|ENSG00000129353.14|ENSG00000129353.14|0|5216	4	65.75
ENSG00000241837.6|mRNA|ATP5O|ENSG00000241837.6|ENSG00000241837.6|0|3336	4	86.5
ENSG00000224846.2|lncRNA|AL133351.1|ENSG00000224846.2|ENSG00000224846.2|0|539	4	61.75
ENSG00000127920.5|mRNA|GNG11|ENSG00000127920.5|ENSG00000127920.5|0|3055	4	46.5
ENSG00000251595.7|pseudogene|ABCA11P|ENSG00000251595.7|ENSG00000251595.7|0|2790	4	52
ENSG00000254659.2|lncRNA|AP002444.1|ENSG00000254659.2|ENSG00000254659.2|0|620	4	57.25
ENSG00000240207.6|lncRNA|AC080013.1|ENSG00000240207.6|ENSG00000240207.6|0|4177	4	70
ENSG00000135144.7|mRNA|DTX1|ENSG00000135144.7|ENSG00000135144.7|0|4387	4	35.75
ENSG00000182903.15|mRNA|ZNF721|ENSG00000182903.15|ENSG00000182903.15|0|6390	3	54.6667
ENSG00000116288.12|mRNA|PARK7|ENSG00000116288.12|ENSG00000116288.12|0|2397	3	66
ENSG00000115738.9|mRNA|ID2|ENSG00000115738.9|ENSG00000115738.9|0|2205	3	62.6667
ENSG00000163798.13|mRNA|SLC4A1AP|ENSG00000163798.13|ENSG00000163798.13|0|5207	3	66
ENSG00000069702.10|mRNA|TGFBR3|ENSG00000069702.10|ENSG00000069702.10|0|8705	3	27
ENSG00000183049.12|mRNA|CAMK1D|ENSG00000183049.12|ENSG00000183049.12|0|8762	3	46.6667
ENSG00000163754.17|mRNA|GYG1|ENSG00000163754.17|ENSG00000163754.17|0|3511	3	64.6667
ENSG00000003436.15|mRNA|TFPI|ENSG00000003436.15|ENSG00000003436.15|0|11714	3	33.3333
ENSG00000101190.12|mRNA|TCFL5|ENSG00000101190.12|ENSG00000101190.12|0|3436	3	80
ENSG00000079462.7|mRNA|PAFAH1B3|ENSG00000079462.7|ENSG00000079462.7|0|1419	3	62.3333
ENSG00000055609.17|mRNA|KMT2C|ENSG00000055609.17|ENSG00000055609.17|0|20114	3	42.6667
ENSG00000182732.16|mRNA|RGS6|ENSG00000182732.16|ENSG00000182732.16|0|8937	3	58.3333
ENSG00000139644.12|mRNA|TMBIM6|ENSG00000139644.12|ENSG00000139644.12|0|6186	3	66.6667
ENSG00000158985.13|mRNA|CDC42SE2|ENSG00000158985.13|ENSG00000158985.13|0|6024	3	67.3333
hsa_circ_0004863|circRNA|hsa_circ_0004863|hsa_circ_0004863|hsa_circ_0004863|0|356	3	64
ENSG00000185650.9|mRNA|ZFP36L1|ENSG00000185650.9|ENSG00000185650.9|0|5160	3	27.6667
ENSG00000115295.19|mRNA|CLIP4|ENSG00000115295.19|ENSG00000115295.19|0|7775	3	27.3333
ENSG00000162999.12|mRNA|DUSP19|ENSG00000162999.12|ENSG00000162999.12|0|5376	3	47.3333
ENSG00000112769.18|mRNA|LAMA4|ENSG00000112769.18|ENSG00000112769.18|0|11575	3	77
ENSG00000170935.7|mRNA|NCBP2L|ENSG00000170935.7|ENSG00000170935.7|0|2079	3	78.3333
ENSG00000186088.15|mRNA|GSAP|ENSG00000186088.15|ENSG00000186088.15|0|9001	3	74.6667
ENSG00000131469.12|mRNA|RPL27|ENSG00000131469.12|ENSG00000131469.12|0|2026	3	88.3333
ENSG00000113638.13|mRNA|TTC33|ENSG00000113638.13|ENSG00000113638.13|0|6821	3	50
ENSG00000132470.13|mRNA|ITGB4|ENSG00000132470.13|ENSG00000132470.13|0|6761	3	67.6667
ENSG00000048392.11|mRNA|RRM2B|ENSG00000048392.11|ENSG00000048392.11|0|5548	3	43
ENSG00000213995.11|mRNA|NAXD|ENSG00000213995.11|ENSG00000213995.11|0|2847	3	19.3333
hsa_circ_0005615|circRNA|hsa_circ_0005615|hsa_circ_0005615|hsa_circ_0005615|0|600	3	52.6667
hsa_circ_0004942|circRNA|hsa_circ_0004942|hsa_circ_0004942|hsa_circ_0004942|0|600	3	47.3333
ENSG00000185164.14|mRNA|NOMO2|ENSG00000185164.14|ENSG00000185164.14|0|6801	3	31.3333
ENSG00000110092.3|mRNA|CCND1|ENSG00000110092.3|ENSG00000110092.3|0|4830	3	63
ENSG00000081154.11|mRNA|PCNP|ENSG00000081154.11|ENSG00000081154.11|0|3102	3	83
ENSG00000164292.12|mRNA|RHOBTB3|ENSG00000164292.12|ENSG00000164292.12|0|8833	3	49.6667
ENSG00000072210.18|mRNA|ALDH3A2|ENSG00000072210.18|ENSG00000072210.18|0|6457	3	65.6667
ENSG00000075790.10|mRNA|BCAP29|ENSG00000075790.10|ENSG00000075790.10|0|8409	3	48.6667
hsa_circ_0055814|circRNA|hsa_circ_0055814|hsa_circ_0055814|hsa_circ_0055814|0|600	3	35.3333
ENSG00000134909.18|mRNA|ARHGAP32|ENSG00000134909.18|ENSG00000134909.18|0|12841	3	80
ENSG00000135900.3|mRNA|MRPL44|ENSG00000135900.3|ENSG00000135900.3|0|1748	3	73.6667
hsa_circ_0072593|circRNA|hsa_circ_0072593|hsa_circ_0072593|hsa_circ_0072593|0|540	3	62.6667
ENSG00000168906.12|mRNA|MAT2A|ENSG00000168906.12|ENSG00000168906.12|0|4487	3	42.6667
ENSG00000172053.17|mRNA|QARS|ENSG00000172053.17|ENSG00000172053.17|0|4708	3	44.3333
ENSG00000169239.12|mRNA|CA5B|ENSG00000169239.12|ENSG00000169239.12|0|8520	3	40.3333
hsa_circ_0042698|circRNA|hsa_circ_0042698|hsa_circ_0042698|hsa_circ_0042698|0|600	3	45.6667
ENSG00000071205.11|mRNA|ARHGAP10|ENSG00000071205.11|ENSG00000071205.11|0|10759	3	56.3333
ENSG00000169288.17|mRNA|MRPL1|ENSG00000169288.17|ENSG00000169288.17|0|1943	3	49.3333
ENSG00000237651.6|mRNA|C2orf74|ENSG00000237651.6|ENSG00000237651.6|0|1515	3	42
hsa_circ_0082580|circRNA|hsa_circ_0082580|hsa_circ_0082580|hsa_circ_0082580|0|600	3	57.6667
ENSG00000004142.11|mRNA|POLDIP2|ENSG00000004142.11|ENSG00000004142.11|0|2121	3	33
hsa_circ_0088061|circRNA|hsa_circ_0088061|hsa_circ_0088061|hsa_circ_0088061|0|600	3	48
ENSG00000171202.6|mRNA|TMEM126A|ENSG00000171202.6|ENSG00000171202.6|0|971	3	80.6667
ENSG00000107485.15|mRNA|GATA3|ENSG00000107485.15|ENSG00000107485.15|0|3253	3	59.6667
ENSG00000166974.12|mRNA|MAPRE2|ENSG00000166974.12|ENSG00000166974.12|0|6180	3	57
ENSG00000109686.17|mRNA|SH3D19|ENSG00000109686.17|ENSG00000109686.17|0|7789	3	77
ENSG00000177125.5|mRNA|ZBTB34|ENSG00000177125.5|ENSG00000177125.5|0|6606	3	91.6667
ENSG00000182180.13|mRNA|MRPS16|ENSG00000182180.13|ENSG00000182180.13|0|2794	3	71
ENSG00000182093.14|mRNA|WRB|ENSG00000182093.14|ENSG00000182093.14|0|5558	3	66
ENSG00000109519.12|mRNA|GRPEL1|ENSG00000109519.12|ENSG00000109519.12|0|4177	3	89.6667
ENSG00000181929.11|mRNA|PRKAG1|ENSG00000181929.11|ENSG00000181929.11|0|4556	3	86.6667
ENSG00000102103.15|mRNA|PQBP1|ENSG00000102103.15|ENSG00000102103.15|0|1903	3	53.3333
ENSG00000134539.16|mRNA|KLRD1|ENSG00000134539.16|ENSG00000134539.16|0|17404	3	50.6667
ENSG00000178982.9|mRNA|EIF3K|ENSG00000178982.9|ENSG00000178982.9|0|2798	3	82.6667
ENSG00000136930.12|mRNA|PSMB7|ENSG00000136930.12|ENSG00000136930.12|0|1787	3	59.6667
hsa_circ_0039363|circRNA|hsa_circ_0039363|hsa_circ_0039363|hsa_circ_0039363|0|600	3	52.6667
ENSG00000054356.13|mRNA|PTPRN|ENSG00000054356.13|ENSG00000054356.13|0|8261	3	54.3333
ENSG00000166347.18|mRNA|CYB5A|ENSG00000166347.18|ENSG00000166347.18|0|9313	3	82
ENSG00000235505.7|pseudogene|AP002004.1|ENSG00000235505.7|ENSG00000235505.7|0|4307	3	48.3333
ENSG00000166478.9|mRNA|ZNF143|ENSG00000166478.9|ENSG00000166478.9|0|4233	3	64.3333
ENSG00000175061.17|lncRNA|LRRC75A-AS1|ENSG00000175061.17|ENSG00000175061.17|0|3759	3	54.3333
ENSG00000075975.15|mRNA|MKRN2|ENSG00000075975.15|ENSG00000075975.15|0|2848	3	73
ENSG00000175029.16|mRNA|CTBP2|ENSG00000175029.16|ENSG00000175029.16|0|10946	3	43.3333
ENSG00000254741.1|lncRNA|AC067930.2|ENSG00000254741.1|ENSG00000254741.1|0|431	3	76.6667
ENSG00000135318.11|mRNA|NT5E|ENSG00000135318.11|ENSG00000135318.11|0|4533	3	80.6667
ENSG00000215193.12|mRNA|PEX26|ENSG00000215193.12|ENSG00000215193.12|0|20045	3	74.3333
ENSG00000205544.3|mRNA|TMEM256|ENSG00000205544.3|ENSG00000205544.3|0|707	3	67
ENSG00000151838.11|mRNA|CCDC175|ENSG00000151838.11|ENSG00000151838.11|0|3245	3	69.6667
ENSG00000214736.7|mRNA|TOMM6|ENSG00000214736.7|ENSG00000214736.7|0|637	3	67
ENSG00000257529.5|mRNA|RPL36A-HNRNPH2|ENSG00000257529.5|ENSG00000257529.5|0|695	3	89
ENSG00000197746.13|mRNA|PSAP|ENSG00000197746.13|ENSG00000197746.13|0|3239	3	74.3333
ENSG00000033050.7|mRNA|ABCF2|ENSG00000033050.7|ENSG00000033050.7|0|4448	3	59.6667
ENSG00000264707.1|lncRNA|L3MBTL4-AS1|ENSG00000264707.1|ENSG00000264707.1|0|2044	3	28.3333
ENSG00000118894.14|mRNA|EEF2KMT|ENSG00000118894.14|ENSG00000118894.14|0|3128	3	87
ENSG00000197903.7|mRNA|HIST1H2BK|ENSG00000197903.7|ENSG00000197903.7|0|381	3	47
ENSG00000150753.11|mRNA|CCT5|ENSG00000150753.11|ENSG00000150753.11|0|5839	3	45.6667
ENSG00000065427.14|mRNA|KARS|ENSG00000065427.14|ENSG00000065427.14|0|4065	3	65
ENSG00000119013.8|mRNA|NDUFB3|ENSG00000119013.8|ENSG00000119013.8|0|1103	3	57.6667
ENSG00000119403.13|mRNA|PHF19|ENSG00000119403.13|ENSG00000119403.13|0|6733	3	52
hsa_circ_0000211|circRNA|hsa_circ_0000211|hsa_circ_0000211|hsa_circ_0000211|0|600	3	58.3333
ENSG00000149557.12|mRNA|FEZ1|ENSG00000149557.12|ENSG00000149557.12|0|5937	3	42.3333
ENSG00000152234.15|mRNA|ATP5A1|ENSG00000152234.15|ENSG00000152234.15|0|10908	3	37
ENSG00000149196.15|mRNA|HIKESHI|ENSG00000149196.15|ENSG00000149196.15|0|3421	3	44.3333
ENSG00000198242.13|mRNA|RPL23A|ENSG00000198242.13|ENSG00000198242.13|0|2824	3	70.6667
ENSG00000121101.15|mRNA|TEX14|ENSG00000121101.15|ENSG00000121101.15|0|5325	3	51
ENSG00000198478.7|mRNA|SH3BGRL2|ENSG00000198478.7|ENSG00000198478.7|0|4653	3	93.6667
ENSG00000256263.1|pseudogene|DDX11L8|ENSG00000256263.1|ENSG00000256263.1|0|366	3	59.6667
ENSG00000100092.20|mRNA|SH3BP1|ENSG00000100092.20|ENSG00000100092.20|0|6170	3	71.3333
ENSG00000063241.7|mRNA|ISOC2|ENSG00000063241.7|ENSG00000063241.7|0|4408	3	66.6667
ENSG00000143153.12|mRNA|ATP1B1|ENSG00000143153.12|ENSG00000143153.12|0|2962	3	40.6667
ENSG00000142541.16|mRNA|RPL13A|ENSG00000142541.16|ENSG00000142541.16|0|2369	3	81.3333
ENSG00000147394.18|mRNA|ZNF185|ENSG00000147394.18|ENSG00000147394.18|0|4812	3	82.3333
ENSG00000147457.13|mRNA|CHMP7|ENSG00000147457.13|ENSG00000147457.13|0|4698	3	65.6667
ENSG00000198898.13|mRNA|CAPZA2|ENSG00000198898.13|ENSG00000198898.13|0|8425	3	54.6667
ENSG00000147679.11|mRNA|UTP23|ENSG00000147679.11|ENSG00000147679.11|0|5252	3	85.6667
hsa_circ_0001187|circRNA|hsa_circ_0001187|hsa_circ_0001187|hsa_circ_0001187|0|600	3	29
ENSG00000118579.12|mRNA|MED28|ENSG00000118579.12|ENSG00000118579.12|0|10982	3	17.6667
ENSG00000123179.13|mRNA|EBPL|ENSG00000123179.13|ENSG00000123179.13|0|1500	3	65.3333
ENSG00000041353.9|mRNA|RAB27B|ENSG00000041353.9|ENSG00000041353.9|0|7432	3	85
ENSG00000066117.14|mRNA|SMARCD1|ENSG00000066117.14|ENSG00000066117.14|0|5136	3	56
ENSG00000082014.16|mRNA|SMARCD3|ENSG00000082014.16|ENSG00000082014.16|0|5198	3	61.3333
hsa_circ_0001516|circRNA|hsa_circ_0001516|hsa_circ_0001516|hsa_circ_0001516|0|600	3	41.3333
hsa_circ_0001487|circRNA|hsa_circ_0001487|hsa_circ_0001487|hsa_circ_0001487|0|600	3	43
ENSG00000117114.19|mRNA|ADGRL2|ENSG00000117114.19|ENSG00000117114.19|0|7754	3	63
ENSG00000127325.18|mRNA|BEST3|ENSG00000127325.18|ENSG00000127325.18|0|6863	3	42.3333
hsa_circ_0001485|circRNA|hsa_circ_0001485|hsa_circ_0001485|hsa_circ_0001485|0|600	3	31.3333
ENSG00000197345.12|mRNA|MRPL21|ENSG00000197345.12|ENSG00000197345.12|0|2825	3	39.3333
ENSG00000128595.16|mRNA|CALU|ENSG00000128595.16|ENSG00000128595.16|0|4537	3	84.3333
ENSG00000145495.15|mRNA|MARCH6|ENSG00000145495.15|ENSG00000145495.15|0|11336	3	66
ENSG00000091483.6|mRNA|FH|ENSG00000091483.6|ENSG00000091483.6|0|2142	3	56.6667
ENSG00000100181.22|pseudogene|TPTEP1|ENSG00000100181.22|ENSG00000100181.22|0|9653	3	55.6667
ENSG00000213741.9|mRNA|RPS29|ENSG00000213741.9|ENSG00000213741.9|0|9743	3	81.6667
ENSG00000188725.7|mRNA|SMIM15|ENSG00000188725.7|ENSG00000188725.7|0|2889	3	54.3333
ENSG00000127481.14|mRNA|UBR4|ENSG00000127481.14|ENSG00000127481.14|0|24675	3	73
ENSG00000213809.8|mRNA|KLRK1|ENSG00000213809.8|ENSG00000213809.8|0|3030	3	55
ENSG00000141293.15|mRNA|SKAP1|ENSG00000141293.15|ENSG00000141293.15|0|2648	3	75
ENSG00000117697.14|mRNA|NSL1|ENSG00000117697.14|ENSG00000117697.14|0|4091	3	60.6667
ENSG00000260836.1|mRNA|AC245033.1|ENSG00000260836.1|ENSG00000260836.1|0|880	3	79.3333
ENSG00000145632.14|mRNA|PLK2|ENSG00000145632.14|ENSG00000145632.14|0|4768	3	89
ENSG00000267149.2|lncRNA|AC011476.2|ENSG00000267149.2|ENSG00000267149.2|0|1271	2	67.5
ENSG00000174547.13|mRNA|MRPL11|ENSG00000174547.13|ENSG00000174547.13|0|2539	2	8.5
ENSG00000173960.13|mRNA|UBXN2A|ENSG00000173960.13|ENSG00000173960.13|0|6882	2	58.5
ENSG00000269955.2|mRNA|C7orf55-LUC7L2|ENSG00000269955.2|ENSG00000269955.2|0|1661	2	57.5
ENSG00000241343.9|mRNA|RPL36A|ENSG00000241343.9|ENSG00000241343.9|0|3964	2	73
ENSG00000204392.10|mRNA|LSM2|ENSG00000204392.10|ENSG00000204392.10|0|1077	2	84
hsa_circ_0042517|circRNA|hsa_circ_0042517|hsa_circ_0042517|hsa_circ_0042517|0|600	2	52
ENSG00000171476.21|mRNA|HOPX|ENSG00000171476.21|ENSG00000171476.21|0|7753	2	68.5
ENSG00000204323.5|mRNA|SMIM5|ENSG00000204323.5|ENSG00000204323.5|0|5117	2	56.5
hsa_circ_0035938|circRNA|hsa_circ_0035938|hsa_circ_0035938|hsa_circ_0035938|0|600	2	19.5
ENSG00000243317.7|mRNA|C7orf73|ENSG00000243317.7|ENSG00000243317.7|0|4930	2	83.5
ENSG00000063180.8|mRNA|CA11|ENSG00000063180.8|ENSG00000063180.8|0|2075	2	59
ENSG00000236279.6|mRNA|CLEC2L|ENSG00000236279.6|ENSG00000236279.6|0|2527	2	59.5
hsa_circ_0075673|circRNA|hsa_circ_0075673|hsa_circ_0075673|hsa_circ_0075673|0|600	2	37
ENSG00000011454.16|mRNA|RABGAP1|ENSG00000011454.16|ENSG00000011454.16|0|9162	2	53
ENSG00000171862.10|mRNA|PTEN|ENSG00000171862.10|ENSG00000171862.10|0|11581	2	87.5
ENSG00000236671.7|lncRNA|PRKG1-AS1|ENSG00000236671.7|ENSG00000236671.7|0|2873	2	69
hsa_circ_0072595|circRNA|hsa_circ_0072595|hsa_circ_0072595|hsa_circ_0072595|0|350	2	25
hsa_circ_0071186|circRNA|hsa_circ_0071186|hsa_circ_0071186|hsa_circ_0071186|0|600	2	46
ENSG00000004961.14|mRNA|HCCS|ENSG00000004961.14|ENSG00000004961.14|0|2335	2	41.5
hsa_circ_0070802|circRNA|hsa_circ_0070802|hsa_circ_0070802|hsa_circ_0070802|0|472	2	36
hsa_circ_0067808|circRNA|hsa_circ_0067808|hsa_circ_0067808|hsa_circ_0067808|0|600	2	33
ENSG00000272053.1|lncRNA|AL160400.1|ENSG00000272053.1|ENSG00000272053.1|0|1030	2	85.5
ENSG00000017260.19|mRNA|ATP2C1|ENSG00000017260.19|ENSG00000017260.19|0|8533	2	25.5
hsa_circ_0080831|circRNA|hsa_circ_0080831|hsa_circ_0080831|hsa_circ_0080831|0|600	2	63.5
hsa_circ_0062191|circRNA|hsa_circ_0062191|hsa_circ_0062191|hsa_circ_0062191|0|600	2	68
ENSG00000258733.5|lncRNA|LINC02328|ENSG00000258733.5|ENSG00000258733.5|0|1568	2	39.5
hsa_circ_0057338|circRNA|hsa_circ_0057338|hsa_circ_0057338|hsa_circ_0057338|0|600	2	73.5
hsa_circ_0057023|circRNA|hsa_circ_0057023|hsa_circ_0057023|hsa_circ_0057023|0|600	2	37.5
ENSG00000205220.11|mRNA|PSMB10|ENSG00000205220.11|ENSG00000205220.11|0|1853	2	58.5
hsa_circ_0077983|circRNA|hsa_circ_0077983|hsa_circ_0077983|hsa_circ_0077983|0|600	2	42.5
hsa_circ_0055019|circRNA|hsa_circ_0055019|hsa_circ_0055019|hsa_circ_0055019|0|600	2	46.5
ENSG00000236397.3|pseudogene|DDX11L2|ENSG00000236397.3|ENSG00000236397.3|0|1398	2	90.5
ENSG00000205126.2|mRNA|ACCSL|ENSG00000205126.2|ENSG00000205126.2|0|1867	2	70.5
hsa_circ_0001947|circRNA|hsa_circ_0001947|hsa_circ_0001947|hsa_circ_0001947|0|600	2	87
ENSG00000070423.17|mRNA|RNF126|ENSG00000070423.17|ENSG00000070423.17|0|3496	2	73.5
hsa_circ_0001483|circRNA|hsa_circ_0001483|hsa_circ_0001483|hsa_circ_0001483|0|600	2	51
ENSG00000053372.4|mRNA|MRTO4|ENSG00000053372.4|ENSG00000053372.4|0|2822	2	81.5
hsa_circ_0008768|circRNA|hsa_circ_0008768|hsa_circ_0008768|hsa_circ_0008768|0|600	2	83.5
hsa_circ_0000652|circRNA|hsa_circ_0000652|hsa_circ_0000652|hsa_circ_0000652|0|528	2	26.5
ENSG00000226824.6|lncRNA|AC006001.2|ENSG00000226824.6|ENSG00000226824.6|0|938	2	77.5
ENSG00000062485.18|mRNA|CS|ENSG00000062485.18|ENSG00000062485.18|0|6402	2	56.5
hsa_circ_0000994|circRNA|hsa_circ_0000994|hsa_circ_0000994|hsa_circ_0000994|0|600	2	59.5
ENSG00000250535.1|pseudogene|STK19B|ENSG00000250535.1|ENSG00000250535.1|0|211	2	68
hsa_circ_0006574|circRNA|hsa_circ_0006574|hsa_circ_0006574|hsa_circ_0006574|0|446	2	48.5
hsa_circ_0001362|circRNA|hsa_circ_0001362|hsa_circ_0001362|hsa_circ_0001362|0|600	2	57.5
ENSG00000224046.1|lncRNA|AC005076.1|ENSG00000224046.1|ENSG00000224046.1|0|888	2	88
ENSG00000197386.10|mRNA|HTT|ENSG00000197386.10|ENSG00000197386.10|0|18128	2	82.5
ENSG00000240497.2|lncRNA|AC092919.1|ENSG00000240497.2|ENSG00000240497.2|0|229	2	75
ENSG00000176340.3|mRNA|COX8A|ENSG00000176340.3|ENSG00000176340.3|0|507	2	64.5
ENSG00000251600.6|lncRNA|AC139713.2|ENSG00000251600.6|ENSG00000251600.6|0|12703	2	49
hsa_circ_0003433|circRNA|hsa_circ_0003433|hsa_circ_0003433|hsa_circ_0003433|0|600	2	76
ENSG00000253819.1|lncRNA|LINC01151|ENSG00000253819.1|ENSG00000253819.1|0|571	2	78.5
ENSG00000222032.1|lncRNA|AC112721.2|ENSG00000222032.1|ENSG00000222032.1|0|541	2	48
ENSG00000186469.8|mRNA|GNG2|ENSG00000186469.8|ENSG00000186469.8|0|6379	2	82.5
ENSG00000187109.13|mRNA|NAP1L1|ENSG00000187109.13|ENSG00000187109.13|0|17355	2	73
ENSG00000187446.11|mRNA|CHP1|ENSG00000187446.11|ENSG00000187446.11|0|3950	2	51
hsa_circ_0002484|circRNA|hsa_circ_0002484|hsa_circ_0002484|hsa_circ_0002484|0|600	2	78
ENSG00000187838.16|mRNA|PLSCR3|ENSG00000187838.16|ENSG00000187838.16|0|2834	2	83.5
ENSG00000188921.13|mRNA|HACD4|ENSG00000188921.13|ENSG00000188921.13|0|9152	2	68.5
ENSG00000188677.14|mRNA|PARVB|ENSG00000188677.14|ENSG00000188677.14|0|7403	2	86
ENSG00000197771.12|mRNA|MCMBP|ENSG00000197771.12|ENSG00000197771.12|0|6000	2	75
hsa_circ_0017312|circRNA|hsa_circ_0017312|hsa_circ_0017312|hsa_circ_0017312|0|466	2	58.5
ENSG00000248408.1|lncRNA|LINC02469|ENSG00000248408.1|ENSG00000248408.1|0|741	2	51.5
ENSG00000255819.7|mRNA|KLRC4-KLRK1|ENSG00000255819.7|ENSG00000255819.7|0|2592	2	68.5
ENSG00000177119.15|mRNA|ANO6|ENSG00000177119.15|ENSG00000177119.15|0|8235	2	89.5
hsa_circ_0034516|circRNA|hsa_circ_0034516|hsa_circ_0034516|hsa_circ_0034516|0|536	2	95.5
hsa_circ_0034414|circRNA|hsa_circ_0034414|hsa_circ_0034414|hsa_circ_0034414|0|592	2	84
ENSG00000178035.11|mRNA|IMPDH2|ENSG00000178035.11|ENSG00000178035.11|0|2773	2	82
ENSG00000243678.11|mRNA|NME2|ENSG00000243678.11|ENSG00000243678.11|0|2632	2	84.5
hsa_circ_0032965|circRNA|hsa_circ_0032965|hsa_circ_0032965|hsa_circ_0032965|0|600	2	52.5
ENSG00000257411.1|mRNA|AC034102.2|ENSG00000257411.1|ENSG00000257411.1|0|489	2	75.5
ENSG00000179088.14|mRNA|C12orf42|ENSG00000179088.14|ENSG00000179088.14|0|4898	2	49.5
ENSG00000245213.6|lncRNA|AC105285.1|ENSG00000245213.6|ENSG00000245213.6|0|3367	2	56
hsa_circ_0030567|circRNA|hsa_circ_0030567|hsa_circ_0030567|hsa_circ_0030567|0|600	2	48.5
ENSG00000069966.18|mRNA|GNB5|ENSG00000069966.18|ENSG00000069966.18|0|13302	2	89
ENSG00000181458.10|mRNA|TMEM45A|ENSG00000181458.10|ENSG00000181458.10|0|6005	2	70.5
hsa_circ_0002247|circRNA|hsa_circ_0002247|hsa_circ_0002247|hsa_circ_0002247|0|492	2	88.5
ENSG00000234425.1|lncRNA|AL138930.1|ENSG00000234425.1|ENSG00000234425.1|0|635	2	81.5
ENSG00000278828.1|mRNA|HIST1H3H|ENSG00000278828.1|ENSG00000278828.1|0|1237	2	35.5
ENSG00000182372.9|mRNA|CLN8|ENSG00000182372.9|ENSG00000182372.9|0|9459	2	73
ENSG00000233554.5|lncRNA|B4GALT1-AS1|ENSG00000233554.5|ENSG00000233554.5|0|843	2	85
ENSG00000215845.10|mRNA|TSTD1|ENSG00000215845.10|ENSG00000215845.10|0|1210	2	80
ENSG00000182541.17|mRNA|LIMK2|ENSG00000182541.17|ENSG00000182541.17|0|6170	2	17.5
ENSG00000233527.8|lncRNA|ZNF529-AS1|ENSG00000233527.8|ENSG00000233527.8|0|1868	2	57
ENSG00000281887.3|mRNA|GIMAP1-GIMAP5|ENSG00000281887.3|ENSG00000281887.3|0|2148	2	23
hsa_circ_0027460|circRNA|hsa_circ_0027460|hsa_circ_0027460|hsa_circ_0027460|0|600	2	41
hsa_circ_0024193|circRNA|hsa_circ_0024193|hsa_circ_0024193|hsa_circ_0024193|0|600	2	54
ENSG00000214026.10|mRNA|MRPL23|ENSG00000214026.10|ENSG00000214026.10|0|2975	2	38
ENSG00000103160.11|mRNA|HSDL1|ENSG00000103160.11|ENSG00000103160.11|0|4507	2	37
ENSG00000131966.13|mRNA|ACTR10|ENSG00000131966.13|ENSG00000131966.13|0|4039	2	86.5
ENSG00000125744.11|mRNA|RTN2|ENSG00000125744.11|ENSG00000125744.11|0|3238	2	40.5
ENSG00000141854.9|mRNA|MISP3|ENSG00000141854.9|ENSG00000141854.9|0|2354	2	73
ENSG00000124191.17|mRNA|TOX2|ENSG00000124191.17|ENSG00000124191.17|0|3223	2	62
ENSG00000160213.6|mRNA|CSTB|ENSG00000160213.6|ENSG00000160213.6|0|3935	2	12
ENSG00000160752.14|mRNA|FDPS|ENSG00000160752.14|ENSG00000160752.14|0|3718	2	44.5
ENSG00000141504.11|mRNA|SAT2|ENSG00000141504.11|ENSG00000141504.11|0|1643	2	69.5
ENSG00000141503.15|mRNA|MINK1|ENSG00000141503.15|ENSG00000141503.15|0|7817	2	60.5
ENSG00000100300.17|mRNA|TSPO|ENSG00000100300.17|ENSG00000100300.17|0|1455	2	74
ENSG00000113600.10|mRNA|C9|ENSG00000113600.10|ENSG00000113600.10|0|2951	2	66.5
ENSG00000162722.8|mRNA|TRIM58|ENSG00000162722.8|ENSG00000162722.8|0|3225	2	74.5
ENSG00000162817.6|mRNA|C1orf115|ENSG00000162817.6|ENSG00000162817.6|0|3413	2	67
ENSG00000113140.10|mRNA|SPARC|ENSG00000113140.10|ENSG00000113140.10|0|4831	2	74.5
ENSG00000163220.10|mRNA|S100A9|ENSG00000163220.10|ENSG00000163220.10|0|577	2	80
ENSG00000163297.16|mRNA|ANTXR2|ENSG00000163297.16|ENSG00000163297.16|0|9864	2	78
ENSG00000100292.16|mRNA|HMOX1|ENSG00000100292.16|ENSG00000100292.16|0|2405	2	54.5
ENSG00000112182.14|mRNA|BACH2|ENSG00000112182.14|ENSG00000112182.14|0|9786	2	46
ENSG00000093167.17|mRNA|LRRFIP2|ENSG00000093167.17|ENSG00000093167.17|0|10644	2	76
ENSG00000125354.22|mRNA|SEPT6|ENSG00000125354.22|ENSG00000125354.22|0|6245	2	85.5
ENSG00000137760.14|mRNA|ALKBH8|ENSG00000137760.14|ENSG00000137760.14|0|4506	2	51
ENSG00000100243.20|mRNA|CYB5R3|ENSG00000100243.20|ENSG00000100243.20|0|5973	2	72.5
ENSG00000137573.13|mRNA|SULF1|ENSG00000137573.13|ENSG00000137573.13|0|9404	2	64.5
ENSG00000137501.17|mRNA|SYTL2|ENSG00000137501.17|ENSG00000137501.17|0|11258	2	43
ENSG00000164116.16|mRNA|GUCY1A3|ENSG00000164116.16|ENSG00000164116.16|0|5766	2	58.5
ENSG00000164587.11|mRNA|RPS14|ENSG00000164587.11|ENSG00000164587.11|0|4544	2	68.5
ENSG00000137460.8|mRNA|FHDC1|ENSG00000137460.8|ENSG00000137460.8|0|6593	2	63.5
ENSG00000137309.19|mRNA|HMGA1|ENSG00000137309.19|ENSG00000137309.19|0|2327	2	50.5
ENSG00000164691.16|mRNA|TAGAP|ENSG00000164691.16|ENSG00000164691.16|0|4089	2	60
ENSG00000165140.9|mRNA|FBP1|ENSG00000165140.9|ENSG00000165140.9|0|1668	2	55.5
ENSG00000109339.20|mRNA|MAPK10|ENSG00000109339.20|ENSG00000109339.20|0|42646	2	48
ENSG00000165782.10|mRNA|TMEM55B|ENSG00000165782.10|ENSG00000165782.10|0|3803	2	64.5
ENSG00000143319.16|mRNA|ISG20L2|ENSG00000143319.16|ENSG00000143319.16|0|5262	2	79.5
ENSG00000159055.3|mRNA|MIS18A|ENSG00000159055.3|ENSG00000159055.3|0|1723	2	89.5
ENSG00000158710.14|mRNA|TAGLN2|ENSG00000158710.14|ENSG00000158710.14|0|2487	2	79
ENSG00000121879.3|mRNA|PIK3CA|ENSG00000121879.3|ENSG00000121879.3|0|9411	2	20
ENSG00000085415.15|mRNA|SEH1L|ENSG00000085415.15|ENSG00000085415.15|0|10481	2	77.5
ENSG00000119801.12|mRNA|YPEL5|ENSG00000119801.12|ENSG00000119801.12|0|3421	2	19.5
ENSG00000146376.10|mRNA|ARHGAP18|ENSG00000146376.10|ENSG00000146376.10|0|4640	2	43
ENSG00000119778.14|mRNA|ATAD2B|ENSG00000119778.14|ENSG00000119778.14|0|10492	2	30
ENSG00000145919.10|mRNA|BOD1|ENSG00000145919.10|ENSG00000145919.10|0|2018	2	89
ENSG00000148688.13|mRNA|RPP30|ENSG00000148688.13|ENSG00000148688.13|0|4653	2	60.5
ENSG00000121350.15|mRNA|PYROXD1|ENSG00000121350.15|ENSG00000121350.15|0|5725	2	85
ENSG00000118197.13|mRNA|DDX59|ENSG00000118197.13|ENSG00000118197.13|0|4470	2	64
ENSG00000100347.14|mRNA|SAMM50|ENSG00000100347.14|ENSG00000100347.14|0|6435	2	67
ENSG00000150337.13|mRNA|FCGR1A|ENSG00000150337.13|ENSG00000150337.13|0|2998	2	11.5
ENSG00000117519.15|mRNA|CNN3|ENSG00000117519.15|ENSG00000117519.15|0|2838	2	77.5
ENSG00000151023.16|mRNA|ENKUR|ENSG00000151023.16|ENSG00000151023.16|0|4076	2	64
ENSG00000117318.8|mRNA|ID3|ENSG00000117318.8|ENSG00000117318.8|0|1797	2	71.5
ENSG00000151689.12|mRNA|INPP1|ENSG00000151689.12|ENSG00000151689.12|0|3676	2	80
ENSG00000123500.9|mRNA|COL10A1|ENSG00000123500.9|ENSG00000123500.9|0|3816	2	72
ENSG00000132170.19|mRNA|PPARG|ENSG00000132170.19|ENSG00000132170.19|0|4046	2	61
ENSG00000121897.14|mRNA|LIAS|ENSG00000121897.14|ENSG00000121897.14|0|11735	2	57
ENSG00000100345.20|mRNA|MYH9|ENSG00000100345.20|ENSG00000100345.20|0|8959	2	90
ENSG00000100450.12|mRNA|GZMH|ENSG00000100450.12|ENSG00000100450.12|0|951	2	36.5
ENSG00000145012.13|mRNA|LPP|ENSG00000145012.13|ENSG00000145012.13|0|25535	2	65
ENSG00000154330.12|mRNA|PGM5|ENSG00000154330.12|ENSG00000154330.12|0|7426	2	43.5
ENSG00000116001.15|mRNA|TIA1|ENSG00000116001.15|ENSG00000116001.15|0|6607	2	96
ENSG00000143995.19|mRNA|MEIS1|ENSG00000143995.19|ENSG00000143995.19|0|10934	2	63.5
ENSG00000143862.7|mRNA|ARL8A|ENSG00000143862.7|ENSG00000143862.7|0|1975	2	9.5
ENSG00000156110.13|mRNA|ADK|ENSG00000156110.13|ENSG00000156110.13|0|3184	2	41
ENSG00000143842.14|mRNA|SOX13|ENSG00000143842.14|ENSG00000143842.14|0|7420	2	80.5
ENSG00000143575.14|mRNA|HAX1|ENSG00000143575.14|ENSG00000143575.14|0|2155	2	21.5
ENSG00000143369.14|mRNA|ECM1|ENSG00000143369.14|ENSG00000143369.14|0|3360	2	95
ENSG00000165802.22|mRNA|NSMF|ENSG00000165802.22|ENSG00000165802.22|0|4912	2	52.5
ENSG00000120437.8|mRNA|ACAT2|ENSG00000120437.8|ENSG00000120437.8|0|4299	2	72
ENSG00000135297.15|mRNA|MTO1|ENSG00000135297.15|ENSG00000135297.15|0|12071	2	40.5
ENSG00000166260.11|mRNA|COX11|ENSG00000166260.11|ENSG00000166260.11|0|6488	2	63.5
ENSG00000105516.10|mRNA|DBP|ENSG00000105516.10|ENSG00000105516.10|0|6544	2	95
ENSG00000104312.7|mRNA|RIPK2|ENSG00000104312.7|ENSG00000104312.7|0|3117	2	44.5
ENSG00000105887.10|mRNA|MTPN|ENSG00000105887.10|ENSG00000105887.10|0|3775	2	87.5
ENSG00000136490.8|mRNA|LIMD2|ENSG00000136490.8|ENSG00000136490.8|0|4745	2	83
ENSG00000102265.11|mRNA|TIMP1|ENSG00000102265.11|ENSG00000102265.11|0|1541	2	41
ENSG00000129595.12|mRNA|EPB41L4A|ENSG00000129595.12|ENSG00000129595.12|0|8582	2	76.5
ENSG00000129757.12|mRNA|CDKN1C|ENSG00000129757.12|ENSG00000129757.12|0|2586	2	56
ENSG00000107625.12|mRNA|DDX50|ENSG00000107625.12|ENSG00000107625.12|0|2692	2	68.5
ENSG00000099139.13|mRNA|PCSK5|ENSG00000099139.13|ENSG00000099139.13|0|12705	2	26
ENSG00000166927.12|mRNA|MS4A7|ENSG00000166927.12|ENSG00000166927.12|0|4348	2	54.5
ENSG00000128791.11|mRNA|TWSG1|ENSG00000128791.11|ENSG00000128791.11|0|4435	2	51.5
ENSG00000169019.10|mRNA|COMMD8|ENSG00000169019.10|ENSG00000169019.10|0|1766	2	34
ENSG00000129235.10|mRNA|TXNDC17|ENSG00000129235.10|ENSG00000129235.10|0|3784	2	62
ENSG00000168300.13|mRNA|PCMTD1|ENSG00000168300.13|ENSG00000168300.13|0|7323	2	95
ENSG00000106351.12|mRNA|AGFG2|ENSG00000106351.12|ENSG00000106351.12|0|5478	2	47
ENSG00000169738.7|mRNA|DCXR|ENSG00000169738.7|ENSG00000169738.7|0|1902	2	56.5
ENSG00000078618.21|mRNA|NRDC|ENSG00000078618.21|ENSG00000078618.21|0|6773	2	96.5
ENSG00000105559.11|mRNA|PLEKHA4|ENSG00000105559.11|ENSG00000105559.11|0|3851	2	47
ENSG00000136826.14|mRNA|KLF4|ENSG00000136826.14|ENSG00000136826.14|0|3659	2	52
ENSG00000168216.10|mRNA|LMBRD1|ENSG00000168216.10|ENSG00000168216.10|0|2402	2	71
ENSG00000099341.11|mRNA|PSMD8|ENSG00000099341.11|ENSG00000099341.11|0|3105	2	47.5
ENSG00000134755.14|mRNA|DSC2|ENSG00000134755.14|ENSG00000134755.14|0|12371	2	42.5
ENSG00000095303.14|mRNA|PTGS1|ENSG00000095303.14|ENSG00000095303.14|0|5790	2	63.5
ENSG00000103381.11|mRNA|CPPED1|ENSG00000103381.11|ENSG00000103381.11|0|6484	2	81.5
ENSG00000131724.10|mRNA|IL13RA1|ENSG00000131724.10|ENSG00000131724.10|0|4372	2	71.5
ENSG00000105643.9|mRNA|ARRDC2|ENSG00000105643.9|ENSG00000105643.9|0|4637	2	81.5
ENSG00000255325.2|lncRNA|AC108136.1|ENSG00000255325.2|ENSG00000255325.2|0|631	1	57
ENSG00000273173.5|mRNA|SNURF|ENSG00000273173.5|ENSG00000273173.5|0|1175	1	86
ENSG00000122779.17|mRNA|TRIM24|ENSG00000122779.17|ENSG00000122779.17|0|9223	1	80
ENSG00000255028.5|lncRNA|AP003049.2|ENSG00000255028.5|ENSG00000255028.5|0|1091	1	58
ENSG00000122223.12|mRNA|CD244|ENSG00000122223.12|ENSG00000122223.12|0|2857	1	6
ENSG00000255197.5|lncRNA|AC090559.1|ENSG00000255197.5|ENSG00000255197.5|0|1113	1	74
ENSG00000122741.15|mRNA|DCAF10|ENSG00000122741.15|ENSG00000122741.15|0|8492	1	37
ENSG00000122483.17|mRNA|CCDC18|ENSG00000122483.17|ENSG00000122483.17|0|5633	1	94
ENSG00000273611.4|mRNA|ZNHIT3|ENSG00000273611.4|ENSG00000273611.4|0|6687	1	92
ENSG00000260479.1|lncRNA|AC009145.1|ENSG00000260479.1|ENSG00000260479.1|0|433	1	71
ENSG00000130165.10|mRNA|ELOF1|ENSG00000130165.10|ENSG00000130165.10|0|4173	1	79
ENSG00000130699.18|mRNA|TAF4|ENSG00000130699.18|ENSG00000130699.18|0|9808	1	24
ENSG00000120594.16|mRNA|PLXDC2|ENSG00000120594.16|ENSG00000120594.16|0|12567	1	78
ENSG00000005961.17|mRNA|ITGA2B|ENSG00000005961.17|ENSG00000005961.17|0|5551	1	63
ENSG00000279673.1|lncRNA|AC092919.2|ENSG00000279673.1|ENSG00000279673.1|0|1645	1	80
ENSG00000131931.8|mRNA|THAP1|ENSG00000131931.8|ENSG00000131931.8|0|2462	1	15
ENSG00000008018.8|mRNA|PSMB1|ENSG00000008018.8|ENSG00000008018.8|0|2256	1	94
ENSG00000120913.23|mRNA|PDLIM2|ENSG00000120913.23|ENSG00000120913.23|0|12388	1	89
ENSG00000131373.14|mRNA|HACL1|ENSG00000131373.14|ENSG00000131373.14|0|3055	1	95
ENSG00000131100.12|mRNA|ATP6V1E1|ENSG00000131100.12|ENSG00000131100.12|0|3212	1	56
ENSG00000121775.17|mRNA|TMEM39B|ENSG00000121775.17|ENSG00000121775.17|0|2820	1	46
ENSG00000273729.1|lncRNA|AC007686.3|ENSG00000273729.1|ENSG00000273729.1|0|3487	1	58
ENSG00000254138.1|lncRNA|AC113386.1|ENSG00000254138.1|ENSG00000254138.1|0|381	1	95
ENSG00000008853.16|mRNA|RHOBTB2|ENSG00000008853.16|ENSG00000008853.16|0|6580	1	49
ENSG00000130511.15|mRNA|SSBP4|ENSG00000130511.15|ENSG00000130511.15|0|2974	1	86
ENSG00000277791.4|mRNA|PSMB3|ENSG00000277791.4|ENSG00000277791.4|0|1179	1	85
ENSG00000130332.14|mRNA|LSM7|ENSG00000130332.14|ENSG00000130332.14|0|1698	1	17
ENSG00000099977.13|mRNA|DDT|ENSG00000099977.13|ENSG00000099977.13|0|1753	1	63
ENSG00000122873.11|mRNA|CISD1|ENSG00000122873.11|ENSG00000122873.11|0|2857	1	99
ENSG00000039319.16|mRNA|ZFYVE16|ENSG00000039319.16|ENSG00000039319.16|0|11461	1	68
ENSG00000039560.13|mRNA|RAI14|ENSG00000039560.13|ENSG00000039560.13|0|7687	1	38
ENSG00000269893.6|lncRNA|SNHG8|ENSG00000269893.6|ENSG00000269893.6|0|923	1	38
ENSG00000122971.8|mRNA|ACADS|ENSG00000122971.8|ENSG00000122971.8|0|2648	1	82
ENSG00000126067.11|mRNA|PSMB2|ENSG00000126067.11|ENSG00000126067.11|0|4843	1	47
ENSG00000128739.21|mRNA|SNRPN|ENSG00000128739.21|ENSG00000128739.21|0|2929	1	71
ENSG00000128052.8|mRNA|KDR|ENSG00000128052.8|ENSG00000128052.8|0|6259	1	78
ENSG00000127831.10|mRNA|VIL1|ENSG00000127831.10|ENSG00000127831.10|0|6920	1	88
ENSG00000126368.5|mRNA|NR1D1|ENSG00000126368.5|ENSG00000126368.5|0|2772	1	62
ENSG00000120278.15|mRNA|PLEKHG1|ENSG00000120278.15|ENSG00000120278.15|0|7378	1	90
ENSG00000262814.7|mRNA|MRPL12|ENSG00000262814.7|ENSG00000262814.7|0|1028	1	91
ENSG00000258999.1|lncRNA|AL136040.1|ENSG00000258999.1|ENSG00000258999.1|0|601	1	82
ENSG00000259162.1|pseudogene|AL355075.5|ENSG00000259162.1|ENSG00000259162.1|0|992	1	41
ENSG00000259345.5|lncRNA|AC013652.1|ENSG00000259345.5|ENSG00000259345.5|0|3242	1	39
ENSG00000255363.2|lncRNA|AP001189.5|ENSG00000255363.2|ENSG00000255363.2|0|1725	1	88
ENSG00000262660.1|mRNA|AC139530.2|ENSG00000262660.1|ENSG00000262660.1|0|1922	1	69
ENSG00000262481.5|mRNA|TMEM256-PLSCR3|ENSG00000262481.5|ENSG00000262481.5|0|2557	1	75
ENSG00000125630.15|mRNA|POLR1B|ENSG00000125630.15|ENSG00000125630.15|0|6329	1	41
ENSG00000125652.7|mRNA|ALKBH7|ENSG00000125652.7|ENSG00000125652.7|0|1455	1	86
ENSG00000125656.8|mRNA|CLPP|ENSG00000125656.8|ENSG00000125656.8|0|2276	1	89
ENSG00000260238.6|mRNA|PMF1-BGLAP|ENSG00000260238.6|ENSG00000260238.6|0|1007	1	51
ENSG00000261067.7|lncRNA|AC109460.3|ENSG00000261067.7|ENSG00000261067.7|0|5296	1	87
ENSG00000100227.17|mRNA|POLDIP3|ENSG00000100227.17|ENSG00000100227.17|0|3650	1	5
ENSG00000264964.1|lncRNA|AP001033.1|ENSG00000264964.1|ENSG00000264964.1|0|466	1	65
ENSG00000124783.12|mRNA|SSR1|ENSG00000124783.12|ENSG00000124783.12|0|11349	1	82
ENSG00000124702.17|mRNA|KLHDC3|ENSG00000124702.17|ENSG00000124702.17|0|2019	1	16
ENSG00000011258.15|mRNA|MBTD1|ENSG00000011258.15|ENSG00000011258.15|0|7201	1	92
ENSG00000255364.1|lncRNA|SMILR|ENSG00000255364.1|ENSG00000255364.1|0|553	1	85
ENSG00000125835.18|mRNA|SNRPB|ENSG00000125835.18|ENSG00000125835.18|0|1278	1	29
ENSG00000123728.9|mRNA|RAP2C|ENSG00000123728.9|ENSG00000123728.9|0|4118	1	61
ENSG00000124103.8|mRNA|FAM209A|ENSG00000124103.8|ENSG00000124103.8|0|1137	1	52
ENSG00000034713.7|mRNA|GABARAPL2|ENSG00000034713.7|ENSG00000034713.7|0|3034	1	73
ENSG00000267855.5|mRNA|NDUFA7|ENSG00000267855.5|ENSG00000267855.5|0|1413	1	80
ENSG00000129636.12|mRNA|ITFG1|ENSG00000129636.12|ENSG00000129636.12|0|7770	1	31
ENSG00000129292.20|mRNA|PHF20L1|ENSG00000129292.20|ENSG00000129292.20|0|20571	1	70
ENSG00000267680.5|mRNA|ZNF224|ENSG00000267680.5|ENSG00000267680.5|0|7104	1	91
ENSG00000256269.7|mRNA|HMBS|ENSG00000256269.7|ENSG00000256269.7|0|4247	1	62
ENSG00000124593.15|mRNA|AL365205.1|ENSG00000124593.15|ENSG00000124593.15|0|4479	1	93
ENSG00000256566.1|mRNA|AL049650.1|ENSG00000256566.1|ENSG00000256566.1|0|823	1	33
ENSG00000022267.16|mRNA|FHL1|ENSG00000022267.16|ENSG00000022267.16|0|5997	1	66
ENSG00000266728.5|mRNA|AC015688.5|ENSG00000266728.5|ENSG00000266728.5|0|730	1	74
ENSG00000100079.6|mRNA|LGALS2|ENSG00000100079.6|ENSG00000100079.6|0|828	1	49
ENSG00000266401.1|lncRNA|AP002478.1|ENSG00000266401.1|ENSG00000266401.1|0|1455	1	99
ENSG00000266356.1|pseudogene|AC090615.1|ENSG00000266356.1|ENSG00000266356.1|0|154	1	57
ENSG00000263020.6|mRNA|AL662899.3|ENSG00000263020.6|ENSG00000263020.6|0|2524	1	55
ENSG00000072042.12|mRNA|RDH11|ENSG00000072042.12|ENSG00000072042.12|0|5518	1	84
ENSG00000120265.16|mRNA|PCMT1|ENSG00000120265.16|ENSG00000120265.16|0|2832	1	30
hsa_circ_0040904|circRNA|hsa_circ_0040904|hsa_circ_0040904|hsa_circ_0040904|0|600	1	79
ENSG00000106636.7|mRNA|YKT6|ENSG00000106636.7|ENSG00000106636.7|0|3707	1	99
hsa_circ_0055014|circRNA|hsa_circ_0055014|hsa_circ_0055014|hsa_circ_0055014|0|600	1	34
hsa_circ_0054618|circRNA|hsa_circ_0054618|hsa_circ_0054618|hsa_circ_0054618|0|600	1	76
hsa_circ_0054144|circRNA|hsa_circ_0054144|hsa_circ_0054144|hsa_circ_0054144|0|600	1	59
hsa_circ_0052525|circRNA|hsa_circ_0052525|hsa_circ_0052525|hsa_circ_0052525|0|524	1	18
ENSG00000107140.15|mRNA|TESK1|ENSG00000107140.15|ENSG00000107140.15|0|3298	1	52
hsa_circ_0047921|circRNA|hsa_circ_0047921|hsa_circ_0047921|hsa_circ_0047921|0|600	1	84
hsa_circ_0047920|circRNA|hsa_circ_0047920|hsa_circ_0047920|hsa_circ_0047920|0|600	1	61
hsa_circ_0047554|circRNA|hsa_circ_0047554|hsa_circ_0047554|hsa_circ_0047554|0|450	1	47
hsa_circ_0042767|circRNA|hsa_circ_0042767|hsa_circ_0042767|hsa_circ_0042767|0|600	1	10
ENSG00000108064.10|mRNA|TFAM|ENSG00000108064.10|ENSG00000108064.10|0|5606	1	50
ENSG00000108298.9|mRNA|RPL19|ENSG00000108298.9|ENSG00000108298.9|0|2368	1	83
ENSG00000108344.14|mRNA|PSMD3|ENSG00000108344.14|ENSG00000108344.14|0|4964	1	89
ENSG00000110693.17|mRNA|SOX6|ENSG00000110693.17|ENSG00000110693.17|0|19636	1	56
hsa_circ_0037010|circRNA|hsa_circ_0037010|hsa_circ_0037010|hsa_circ_0037010|0|600	1	65
ENSG00000108591.9|mRNA|DRG2|ENSG00000108591.9|ENSG00000108591.9|0|7411	1	41
ENSG00000108828.15|mRNA|VAT1|ENSG00000108828.15|ENSG00000108828.15|0|3501	1	72
hsa_circ_0034517|circRNA|hsa_circ_0034517|hsa_circ_0034517|hsa_circ_0034517|0|600	1	64
ENSG00000108960.7|mRNA|MMD|ENSG00000108960.7|ENSG00000108960.7|0|3177	1	94
ENSG00000109320.11|mRNA|NFKB1|ENSG00000109320.11|ENSG00000109320.11|0|6257	1	77
hsa_circ_0031571|circRNA|hsa_circ_0031571|hsa_circ_0031571|hsa_circ_0031571|0|600	1	9
hsa_circ_0030608|circRNA|hsa_circ_0030608|hsa_circ_0030608|hsa_circ_0030608|0|600	1	23
hsa_circ_0030572|circRNA|hsa_circ_0030572|hsa_circ_0030572|hsa_circ_0030572|0|600	1	31
ENSG00000109466.13|mRNA|KLHL2|ENSG00000109466.13|ENSG00000109466.13|0|3872	1	52
hsa_circ_0030228|circRNA|hsa_circ_0030228|hsa_circ_0030228|hsa_circ_0030228|0|600	1	7
ENSG00000110446.10|mRNA|SLC15A3|ENSG00000110446.10|ENSG00000110446.10|0|6118	1	70
ENSG00000106603.18|mRNA|COA1|ENSG00000106603.18|ENSG00000106603.18|0|11820	1	50
hsa_circ_0057029|circRNA|hsa_circ_0057029|hsa_circ_0057029|hsa_circ_0057029|0|600	1	61
hsa_circ_0057034|circRNA|hsa_circ_0057034|hsa_circ_0057034|hsa_circ_0057034|0|600	1	55
ENSG00000106028.10|mRNA|SSBP1|ENSG00000106028.10|ENSG00000106028.10|0|4988	1	57
hsa_circ_0087641|circRNA|hsa_circ_0087641|hsa_circ_0087641|hsa_circ_0087641|0|600	1	81
hsa_circ_0087264|circRNA|hsa_circ_0087264|hsa_circ_0087264|hsa_circ_0087264|0|600	1	90
hsa_circ_0086425|circRNA|hsa_circ_0086425|hsa_circ_0086425|hsa_circ_0086425|0|600	1	42
ENSG00000103510.19|mRNA|KAT8|ENSG00000103510.19|ENSG00000103510.19|0|4334	1	39
hsa_circ_0084608|circRNA|hsa_circ_0084608|hsa_circ_0084608|hsa_circ_0084608|0|600	1	18
ENSG00000103740.9|mRNA|ACSBG1|ENSG00000103740.9|ENSG00000103740.9|0|8230	1	83
ENSG00000103966.10|mRNA|EHD4|ENSG00000103966.10|ENSG00000103966.10|0|7879	1	60
hsa_circ_0080856|circRNA|hsa_circ_0080856|hsa_circ_0080856|hsa_circ_0080856|0|600	1	43
hsa_circ_0080837|circRNA|hsa_circ_0080837|hsa_circ_0080837|hsa_circ_0080837|0|414	1	55
ENSG00000102893.15|mRNA|PHKB|ENSG00000102893.15|ENSG00000102893.15|0|11822	1	31
hsa_circ_0080829|circRNA|hsa_circ_0080829|hsa_circ_0080829|hsa_circ_0080829|0|600	1	6
ENSG00000104856.13|mRNA|RELB|ENSG00000104856.13|ENSG00000104856.13|0|3035	1	48
ENSG00000102804.14|mRNA|TSC22D1|ENSG00000102804.14|ENSG00000102804.14|0|8586	1	64
ENSG00000105197.10|mRNA|TIMM50|ENSG00000105197.10|ENSG00000105197.10|0|6911	1	65
ENSG00000105248.15|mRNA|CCDC94|ENSG00000105248.15|ENSG00000105248.15|0|1671	1	44
hsa_circ_0071197|circRNA|hsa_circ_0071197|hsa_circ_0071197|hsa_circ_0071197|0|600	1	23
hsa_circ_0071176|circRNA|hsa_circ_0071176|hsa_circ_0071176|hsa_circ_0071176|0|600	1	14
hsa_circ_0071174|circRNA|hsa_circ_0071174|hsa_circ_0071174|hsa_circ_0071174|0|600	1	77
hsa_circ_0070808|circRNA|hsa_circ_0070808|hsa_circ_0070808|hsa_circ_0070808|0|504	1	90
hsa_circ_0070804|circRNA|hsa_circ_0070804|hsa_circ_0070804|hsa_circ_0070804|0|600	1	72
hsa_circ_0070668|circRNA|hsa_circ_0070668|hsa_circ_0070668|hsa_circ_0070668|0|406	1	82
hsa_circ_0069778|circRNA|hsa_circ_0069778|hsa_circ_0069778|hsa_circ_0069778|0|600	1	68
hsa_circ_0069612|circRNA|hsa_circ_0069612|hsa_circ_0069612|hsa_circ_0069612|0|600	1	20
hsa_circ_0069399|circRNA|hsa_circ_0069399|hsa_circ_0069399|hsa_circ_0069399|0|600	1	41
ENSG00000105647.16|mRNA|PIK3R2|ENSG00000105647.16|ENSG00000105647.16|0|4524	1	82
hsa_circ_0025852|circRNA|hsa_circ_0025852|hsa_circ_0025852|hsa_circ_0025852|0|568	1	36
ENSG00000111052.7|mRNA|LIN7A|ENSG00000111052.7|ENSG00000111052.7|0|6795	1	48
ENSG00000281903.2|lncRNA|LINC02246|ENSG00000281903.2|ENSG00000281903.2|0|3635	1	61
hsa_circ_0001770|circRNA|hsa_circ_0001770|hsa_circ_0001770|hsa_circ_0001770|0|456	1	37
hsa_circ_0004317|circRNA|hsa_circ_0004317|hsa_circ_0004317|hsa_circ_0004317|0|600	1	16
hsa_circ_0003808|circRNA|hsa_circ_0003808|hsa_circ_0003808|hsa_circ_0003808|0|600	1	64
hsa_circ_0003641|circRNA|hsa_circ_0003641|hsa_circ_0003641|hsa_circ_0003641|0|600	1	79
ENSG00000115290.9|mRNA|GRB14|ENSG00000115290.9|ENSG00000115290.9|0|2958	1	76
ENSG00000100592.15|mRNA|DAAM1|ENSG00000100592.15|ENSG00000100592.15|0|10712	1	30
ENSG00000115556.13|mRNA|PLCD4|ENSG00000115556.13|ENSG00000115556.13|0|5867	1	32
hsa_circ_0002898|circRNA|hsa_circ_0002898|hsa_circ_0002898|hsa_circ_0002898|0|600	1	29
ENSG00000115993.12|mRNA|TRAK2|ENSG00000115993.12|ENSG00000115993.12|0|7595	1	94
ENSG00000116138.12|mRNA|DNAJC16|ENSG00000116138.12|ENSG00000116138.12|0|8563	1	21
ENSG00000116670.14|mRNA|MAD2L2|ENSG00000116670.14|ENSG00000116670.14|0|3324	1	64
hsa_circ_0002228|circRNA|hsa_circ_0002228|hsa_circ_0002228|hsa_circ_0002228|0|600	1	56
ENSG00000117133.10|mRNA|RPF1|ENSG00000117133.10|ENSG00000117133.10|0|1728	1	63
hsa_circ_0001673|circRNA|hsa_circ_0001673|hsa_circ_0001673|hsa_circ_0001673|0|600	1	57
hsa_circ_0017971|circRNA|hsa_circ_0017971|hsa_circ_0017971|hsa_circ_0017971|0|600	1	99
ENSG00000100385.13|mRNA|IL2RB|ENSG00000100385.13|ENSG00000100385.13|0|4700	1	25
ENSG00000117335.19|mRNA|CD46|ENSG00000117335.19|ENSG00000117335.19|0|8708	1	46
ENSG00000117724.12|mRNA|CENPF|ENSG00000117724.12|ENSG00000117724.12|0|11690	1	95
ENSG00000118515.11|mRNA|SGK1|ENSG00000118515.11|ENSG00000118515.11|0|9992	1	42
hsa_circ_0000398|circRNA|hsa_circ_0000398|hsa_circ_0000398|hsa_circ_0000398|0|600	1	99
hsa_circ_0000303|circRNA|hsa_circ_0000303|hsa_circ_0000303|hsa_circ_0000303|0|600	1	36
hsa_circ_0000175|circRNA|hsa_circ_0000175|hsa_circ_0000175|hsa_circ_0000175|0|600	1	58
hsa_circ_0000061|circRNA|hsa_circ_0000061|hsa_circ_0000061|hsa_circ_0000061|0|600	1	60
hsa_circ_0000034|circRNA|hsa_circ_0000034|hsa_circ_0000034|hsa_circ_0000034|0|438	1	65
ENSG00000284633.1|lncRNA|AL031590.1|ENSG00000284633.1|ENSG00000284633.1|0|4521	1	15
ENSG00000284337.1|mRNA|AC013271.1|ENSG00000284337.1|ENSG00000284337.1|0|4426	1	51
ENSG00000120053.10|mRNA|GOT1|ENSG00000120053.10|ENSG00000120053.10|0|2424	1	62
hsa_circ_0004780|circRNA|hsa_circ_0004780|hsa_circ_0004780|hsa_circ_0004780|0|600	1	90
ENSG00000114999.7|mRNA|TTL|ENSG00000114999.7|ENSG00000114999.7|0|15732	1	59
ENSG00000100678.18|mRNA|SLC8A3|ENSG00000100678.18|ENSG00000100678.18|0|8444	1	94
hsa_circ_0005192|circRNA|hsa_circ_0005192|hsa_circ_0005192|hsa_circ_0005192|0|564	1	63
ENSG00000111445.13|mRNA|RFC5|ENSG00000111445.13|ENSG00000111445.13|0|3249	1	34
hsa_circ_0013222|circRNA|hsa_circ_0013222|hsa_circ_0013222|hsa_circ_0013222|0|600	1	5
hsa_circ_0010474|circRNA|hsa_circ_0010474|hsa_circ_0010474|hsa_circ_0010474|0|600	1	39
ENSG00000112031.15|mRNA|MTRF1L|ENSG00000112031.15|ENSG00000112031.15|0|4273	1	22
hsa_circ_0008432|circRNA|hsa_circ_0008432|hsa_circ_0008432|hsa_circ_0008432|0|504	1	39
hsa_circ_0008243|circRNA|hsa_circ_0008243|hsa_circ_0008243|hsa_circ_0008243|0|600	1	59
ENSG00000112077.15|mRNA|RHAG|ENSG00000112077.15|ENSG00000112077.15|0|1912	1	58
hsa_circ_0008075|circRNA|hsa_circ_0008075|hsa_circ_0008075|hsa_circ_0008075|0|600	1	70
ENSG00000101162.3|mRNA|TUBB1|ENSG00000101162.3|ENSG00000101162.3|0|3496	1	53
hsa_circ_0007843|circRNA|hsa_circ_0007843|hsa_circ_0007843|hsa_circ_0007843|0|572	1	99
ENSG00000112977.15|mRNA|DAP|ENSG00000112977.15|ENSG00000112977.15|0|3361	1	34
hsa_circ_0007795|circRNA|hsa_circ_0007795|hsa_circ_0007795|hsa_circ_0007795|0|600	1	30
hsa_circ_0007765|circRNA|hsa_circ_0007765|hsa_circ_0007765|hsa_circ_0007765|0|600	1	66
hsa_circ_0007694|circRNA|hsa_circ_0007694|hsa_circ_0007694|hsa_circ_0007694|0|344	1	90
ENSG00000113732.8|mRNA|ATP6V0E1|ENSG00000113732.8|ENSG00000113732.8|0|1623	1	51
ENSG00000005059.15|mRNA|MCUB|ENSG00000005059.15|ENSG00000005059.15|0|3566	1	41
hsa_circ_0006622|circRNA|hsa_circ_0006622|hsa_circ_0006622|hsa_circ_0006622|0|348	1	20
ENSG00000113838.12|mRNA|TBCCD1|ENSG00000113838.12|ENSG00000113838.12|0|3405	1	55
hsa_circ_0006477|circRNA|hsa_circ_0006477|hsa_circ_0006477|hsa_circ_0006477|0|600	1	30
ENSG00000114026.21|mRNA|OGG1|ENSG00000114026.21|ENSG00000114026.21|0|8733	1	40
hsa_circ_0006089|circRNA|hsa_circ_0006089|hsa_circ_0006089|hsa_circ_0006089|0|600	1	62
hsa_circ_0005729|circRNA|hsa_circ_0005729|hsa_circ_0005729|hsa_circ_0005729|0|564	1	86
ENSG00000100714.15|mRNA|MTHFD1|ENSG00000100714.15|ENSG00000100714.15|0|9377	1	87
hsa_circ_0005566|circRNA|hsa_circ_0005566|hsa_circ_0005566|hsa_circ_0005566|0|478	1	95
hsa_circ_0005429|circRNA|hsa_circ_0005429|hsa_circ_0005429|hsa_circ_0005429|0|600	1	87
hsa_circ_0001541|circRNA|hsa_circ_0001541|hsa_circ_0001541|hsa_circ_0001541|0|600	1	38
ENSG00000239672.7|mRNA|NME1|ENSG00000239672.7|ENSG00000239672.7|0|3438	1	74
ENSG00000132383.11|mRNA|RPA1|ENSG00000132383.11|ENSG00000132383.11|0|5492	1	32
ENSG00000162384.13|mRNA|C1orf123|ENSG00000162384.13|ENSG00000162384.13|0|4487	1	68
ENSG00000163092.19|mRNA|XIRP2|ENSG00000163092.19|ENSG00000163092.19|0|13031	1	35
ENSG00000184047.16|mRNA|DIABLO|ENSG00000184047.16|ENSG00000184047.16|0|5967	1	91
ENSG00000163382.11|mRNA|NAXE|ENSG00000163382.11|ENSG00000163382.11|0|1933	1	98
ENSG00000163406.10|mRNA|SLC15A2|ENSG00000163406.10|ENSG00000163406.10|0|6210	1	79
ENSG00000183690.12|mRNA|EFHC2|ENSG00000183690.12|ENSG00000183690.12|0|3319	1	60
ENSG00000163554.12|mRNA|SPTA1|ENSG00000163554.12|ENSG00000163554.12|0|10025	1	63
ENSG00000163681.14|mRNA|SLMAP|ENSG00000163681.14|ENSG00000163681.14|0|14147	1	86
ENSG00000163735.6|mRNA|CXCL5|ENSG00000163735.6|ENSG00000163735.6|0|2538	1	91
ENSG00000183323.12|mRNA|CCDC125|ENSG00000183323.12|ENSG00000183323.12|0|7932	1	95
ENSG00000163788.13|mRNA|SNRK|ENSG00000163788.13|ENSG00000163788.13|0|6981	1	69
ENSG00000163874.10|mRNA|ZC3H12A|ENSG00000163874.10|ENSG00000163874.10|0|3121	1	50
ENSG00000163882.9|mRNA|POLR2H|ENSG00000163882.9|ENSG00000163882.9|0|3146	1	85
ENSG00000182866.16|mRNA|LCK|ENSG00000182866.16|ENSG00000182866.16|0|3339	1	66
ENSG00000163898.9|mRNA|LIPH|ENSG00000163898.9|ENSG00000163898.9|0|4122	1	68
ENSG00000164039.14|mRNA|BDH2|ENSG00000164039.14|ENSG00000164039.14|0|3383	1	61
ENSG00000182718.16|mRNA|ANXA2|ENSG00000182718.16|ENSG00000182718.16|0|8824	1	61
ENSG00000164144.15|mRNA|ARFIP1|ENSG00000164144.15|ENSG00000164144.15|0|4269	1	28
ENSG00000182220.14|mRNA|ATP6AP2|ENSG00000182220.14|ENSG00000182220.14|0|9560	1	81
ENSG00000164615.4|mRNA|CAMLG|ENSG00000164615.4|ENSG00000164615.4|0|2221	1	91
ENSG00000181817.5|mRNA|LSM10|ENSG00000181817.5|ENSG00000181817.5|0|1496	1	96
ENSG00000165476.13|mRNA|REEP3|ENSG00000165476.13|ENSG00000165476.13|0|5248	1	63
ENSG00000165609.12|mRNA|NUDT5|ENSG00000165609.12|ENSG00000165609.12|0|4969	1	66
ENSG00000165646.11|mRNA|SLC18A2|ENSG00000165646.11|ENSG00000165646.11|0|4125	1	96
ENSG00000165672.6|mRNA|PRDX3|ENSG00000165672.6|ENSG00000165672.6|0|3417	1	71
ENSG00000180644.7|mRNA|PRF1|ENSG00000180644.7|ENSG00000180644.7|0|2534	1	58
ENSG00000162910.18|mRNA|MRPL55|ENSG00000162910.18|ENSG00000162910.18|0|1886	1	8
ENSG00000162367.11|mRNA|TAL1|ENSG00000162367.11|ENSG00000162367.11|0|5700	1	28
ENSG00000165702.13|mRNA|GFI1B|ENSG00000165702.13|ENSG00000165702.13|0|6104	1	76
ENSG00000161800.12|mRNA|RACGAP1|ENSG00000161800.12|ENSG00000161800.12|0|4487	1	54
ENSG00000154310.16|mRNA|TNIK|ENSG00000154310.16|ENSG00000154310.16|0|8523	1	99
ENSG00000196655.11|mRNA|TRAPPC4|ENSG00000196655.11|ENSG00000196655.11|0|5140	1	41
ENSG00000196531.10|mRNA|NACA|ENSG00000196531.10|ENSG00000196531.10|0|10008	1	99
ENSG00000154589.6|mRNA|LY96|ENSG00000154589.6|ENSG00000154589.6|0|607	1	72
ENSG00000196363.9|mRNA|WDR5|ENSG00000196363.9|ENSG00000196363.9|0|3629	1	92
ENSG00000196329.11|mRNA|GIMAP5|ENSG00000196329.11|ENSG00000196329.11|0|6031	1	26
ENSG00000154721.14|mRNA|JAM2|ENSG00000154721.14|ENSG00000154721.14|0|5933	1	88
ENSG00000066379.14|mRNA|ZNRD1|ENSG00000066379.14|ENSG00000066379.14|0|3672	1	94
ENSG00000155962.12|mRNA|CLIC2|ENSG00000155962.12|ENSG00000155962.12|0|2840	1	42
ENSG00000081791.8|mRNA|KIAA0141|ENSG00000081791.8|ENSG00000081791.8|0|6047	1	39
ENSG00000157110.15|mRNA|RBPMS|ENSG00000157110.15|ENSG00000157110.15|0|8931	1	60
ENSG00000187796.14|mRNA|CARD9|ENSG00000187796.14|ENSG00000187796.14|0|6699	1	57
ENSG00000157827.19|mRNA|FMNL2|ENSG00000157827.19|ENSG00000157827.19|0|6519	1	91
ENSG00000157978.11|mRNA|LDLRAP1|ENSG00000157978.11|ENSG00000157978.11|0|5397	1	70
ENSG00000158164.6|mRNA|TMSB15A|ENSG00000158164.6|ENSG00000158164.6|0|685	1	64
ENSG00000067064.10|mRNA|IDI1|ENSG00000067064.10|ENSG00000067064.10|0|3589	1	76
ENSG00000159461.14|mRNA|AMFR|ENSG00000159461.14|ENSG00000159461.14|0|5758	1	94
ENSG00000159579.13|mRNA|RSPRY1|ENSG00000159579.13|ENSG00000159579.13|0|6064	1	43
ENSG00000160014.16|mRNA|CALM3|ENSG00000160014.16|ENSG00000160014.16|0|3667	1	79
ENSG00000160124.9|mRNA|CCDC58|ENSG00000160124.9|ENSG00000160124.9|0|1746	1	42
ENSG00000185842.15|mRNA|DNAH14|ENSG00000185842.15|ENSG00000185842.15|0|19693	1	40
ENSG00000160188.9|mRNA|RSPH1|ENSG00000160188.9|ENSG00000160188.9|0|2988	1	66
ENSG00000185551.14|mRNA|NR2F2|ENSG00000185551.14|ENSG00000185551.14|0|6459	1	83
ENSG00000160783.19|mRNA|PMF1|ENSG00000160783.19|ENSG00000160783.19|0|2520	1	65
ENSG00000069248.11|mRNA|NUP133|ENSG00000069248.11|ENSG00000069248.11|0|6080	1	41
ENSG00000165675.16|mRNA|ENOX2|ENSG00000165675.16|ENSG00000165675.16|0|4279	1	92
ENSG00000178852.15|mRNA|EFCAB13|ENSG00000178852.15|ENSG00000178852.15|0|6672	1	54
ENSG00000082512.14|mRNA|TRAF5|ENSG00000082512.14|ENSG00000082512.14|0|9022	1	92
ENSG00000173868.11|mRNA|PHOSPHO1|ENSG00000173868.11|ENSG00000173868.11|0|2375	1	43
ENSG00000173846.12|mRNA|PLK3|ENSG00000173846.12|ENSG00000173846.12|0|3479	1	65
ENSG00000173726.10|mRNA|TOMM20|ENSG00000173726.10|ENSG00000173726.10|0|3542	1	75
ENSG00000075234.16|mRNA|TTC38|ENSG00000075234.16|ENSG00000075234.16|0|3578	1	81
ENSG00000173406.15|mRNA|DAB1|ENSG00000173406.15|ENSG00000173406.15|0|7548	1	84
ENSG00000074964.16|mRNA|ARHGEF10L|ENSG00000074964.16|ENSG00000074964.16|0|7817	1	45
ENSG00000070785.16|mRNA|EIF2B3|ENSG00000070785.16|ENSG00000070785.16|0|3411	1	94
ENSG00000172936.12|mRNA|MYD88|ENSG00000172936.12|ENSG00000172936.12|0|3989	1	30
ENSG00000172794.19|mRNA|RAB37|ENSG00000172794.19|ENSG00000172794.19|0|5074	1	62
ENSG00000168275.14|mRNA|COA6|ENSG00000168275.14|ENSG00000168275.14|0|1257	1	45
ENSG00000172663.8|mRNA|TMEM134|ENSG00000172663.8|ENSG00000172663.8|0|5892	1	72
ENSG00000172175.12|mRNA|MALT1|ENSG00000172175.12|ENSG00000172175.12|0|10850	1	93
ENSG00000172172.7|mRNA|MRPL13|ENSG00000172172.7|ENSG00000172172.7|0|4209	1	53
ENSG00000169057.21|mRNA|MECP2|ENSG00000169057.21|ENSG00000169057.21|0|18366	1	66
ENSG00000172062.16|mRNA|SMN1|ENSG00000172062.16|ENSG00000172062.16|0|3097	1	81
ENSG00000103184.11|mRNA|SEC14L5|ENSG00000103184.11|ENSG00000103184.11|0|6477	1	81
ENSG00000171916.16|mRNA|LGALS9C|ENSG00000171916.16|ENSG00000171916.16|0|4754	1	50
ENSG00000169245.5|mRNA|CXCL10|ENSG00000169245.5|ENSG00000169245.5|0|1176	1	81
ENSG00000169599.12|mRNA|NFU1|ENSG00000169599.12|ENSG00000169599.12|0|2197	1	37
ENSG00000171566.11|mRNA|PLRG1|ENSG00000171566.11|ENSG00000171566.11|0|5049	1	56
ENSG00000171492.14|mRNA|LRRC8D|ENSG00000171492.14|ENSG00000171492.14|0|4852	1	72
ENSG00000169925.16|mRNA|BRD3|ENSG00000169925.16|ENSG00000169925.16|0|6876	1	93
ENSG00000171408.13|mRNA|PDE7B|ENSG00000171408.13|ENSG00000171408.13|0|5946	1	81
ENSG00000170113.15|mRNA|NIPA1|ENSG00000170113.15|ENSG00000170113.15|0|8700	1	58
ENSG00000170310.14|mRNA|STX8|ENSG00000170310.14|ENSG00000170310.14|0|3779	1	28
ENSG00000171130.17|mRNA|ATP6V0E2|ENSG00000171130.17|ENSG00000171130.17|0|3335	1	75
ENSG00000167840.13|mRNA|ZNF232|ENSG00000167840.13|ENSG00000167840.13|0|2794	1	66
ENSG00000167618.9|mRNA|LAIR2|ENSG00000167618.9|ENSG00000167618.9|0|1078	1	44
ENSG00000165819.11|mRNA|METTL3|ENSG00000165819.11|ENSG00000165819.11|0|5894	1	55
ENSG00000167508.11|mRNA|MVD|ENSG00000167508.11|ENSG00000167508.11|0|4717	1	82
ENSG00000178234.12|mRNA|GALNT11|ENSG00000178234.12|ENSG00000178234.12|0|8295	1	43
ENSG00000178125.14|mRNA|PPP1R42|ENSG00000178125.14|ENSG00000178125.14|0|2250	1	51
ENSG00000165914.14|mRNA|TTC7B|ENSG00000165914.14|ENSG00000165914.14|0|21268	1	97
ENSG00000166147.13|mRNA|FBN1|ENSG00000166147.13|ENSG00000166147.13|0|16057	1	37
ENSG00000177697.17|mRNA|CD151|ENSG00000177697.17|ENSG00000177697.17|0|3938	1	74
ENSG00000177324.13|mRNA|BEND2|ENSG00000177324.13|ENSG00000177324.13|0|4637	1	95
ENSG00000177200.16|mRNA|CHD9|ENSG00000177200.16|ENSG00000177200.16|0|16502	1	82
ENSG00000166197.16|mRNA|NOLC1|ENSG00000166197.16|ENSG00000166197.16|0|3970	1	81
ENSG00000166225.8|mRNA|FRS2|ENSG00000166225.8|ENSG00000166225.8|0|7242	1	43
ENSG00000176986.15|mRNA|SEC24C|ENSG00000176986.15|ENSG00000176986.15|0|5341	1	13
ENSG00000176783.14|mRNA|RUFY1|ENSG00000176783.14|ENSG00000176783.14|0|5911	1	79
ENSG00000176731.11|mRNA|C8orf59|ENSG00000176731.11|ENSG00000176731.11|0|2514	1	70
ENSG00000176542.9|mRNA|USF3|ENSG00000176542.9|ENSG00000176542.9|0|13738	1	1
ENSG00000175792.11|mRNA|RUVBL1|ENSG00000175792.11|ENSG00000175792.11|0|6860	1	90
ENSG00000070190.12|mRNA|DAPP1|ENSG00000070190.12|ENSG00000070190.12|0|4548	1	89
ENSG00000166275.15|mRNA|BORCS7|ENSG00000166275.15|ENSG00000166275.15|0|2708	1	80
ENSG00000175130.6|mRNA|MARCKSL1|ENSG00000175130.6|ENSG00000175130.6|0|1699	1	96
ENSG00000166501.12|mRNA|PRKCB|ENSG00000166501.12|ENSG00000166501.12|0|10037	1	40
ENSG00000166685.11|mRNA|COG1|ENSG00000166685.11|ENSG00000166685.11|0|5317	1	27
ENSG00000166831.8|mRNA|RBPMS2|ENSG00000166831.8|ENSG00000166831.8|0|2101	1	27
ENSG00000166963.12|mRNA|MAP1A|ENSG00000166963.12|ENSG00000166963.12|0|10629	1	72
ENSG00000167193.7|mRNA|CRK|ENSG00000167193.7|ENSG00000167193.7|0|4090	1	32
ENSG00000174469.19|mRNA|CNTNAP2|ENSG00000174469.19|ENSG00000174469.19|0|16668	1	51
ENSG00000167325.14|mRNA|RRM1|ENSG00000167325.14|ENSG00000167325.14|0|4177	1	65
ENSG00000174233.11|mRNA|ADCY6|ENSG00000174233.11|ENSG00000174233.11|0|8410	1	79
ENSG00000065989.15|mRNA|PDE4A|ENSG00000065989.15|ENSG00000065989.15|0|6646	1	25
ENSG00000154001.13|mRNA|PPP2R5E|ENSG00000154001.13|ENSG00000154001.13|0|9188	1	68
ENSG00000250961.1|lncRNA|AC025470.2|ENSG00000250961.1|ENSG00000250961.1|0|897	1	25
ENSG00000136518.16|mRNA|ACTL6A|ENSG00000136518.16|ENSG00000136518.16|0|3675	1	99
ENSG00000235802.1|lncRNA|HCFC1-AS1|ENSG00000235802.1|ENSG00000235802.1|0|350	1	61
ENSG00000235531.9|lncRNA|MSC-AS1|ENSG00000235531.9|ENSG00000235531.9|0|6284	1	64
ENSG00000094914.12|mRNA|AAAS|ENSG00000094914.12|ENSG00000094914.12|0|4138	1	96
ENSG00000235257.8|lncRNA|ITGA9-AS1|ENSG00000235257.8|ENSG00000235257.8|0|6651	1	88
ENSG00000235254.3|pseudogene|TMEM185AP1|ENSG00000235254.3|ENSG00000235254.3|0|546	1	75
ENSG00000094880.10|mRNA|CDC23|ENSG00000094880.10|ENSG00000094880.10|0|4618	1	28
ENSG00000136950.13|mRNA|ARPC5L|ENSG00000136950.13|ENSG00000136950.13|0|3610	1	9
ENSG00000234741.7|lncRNA|GAS5|ENSG00000234741.7|ENSG00000234741.7|0|3631	1	38
ENSG00000137033.11|mRNA|IL33|ENSG00000137033.11|ENSG00000137033.11|0|3253	1	46
ENSG00000054965.10|mRNA|FAM168A|ENSG00000054965.10|ENSG00000054965.10|0|7887	1	77
ENSG00000137076.20|mRNA|TLN1|ENSG00000137076.20|ENSG00000137076.20|0|10076	1	97
ENSG00000137133.10|mRNA|HINT2|ENSG00000137133.10|ENSG00000137133.10|0|2395	1	41
ENSG00000137193.13|mRNA|PIM1|ENSG00000137193.13|ENSG00000137193.13|0|2977	1	87
ENSG00000137225.12|mRNA|CAPN11|ENSG00000137225.12|ENSG00000137225.12|0|3549	1	88
ENSG00000055950.16|mRNA|MRPL43|ENSG00000055950.16|ENSG00000055950.16|0|3573	1	85
ENSG00000231312.6|lncRNA|AC007388.1|ENSG00000231312.6|ENSG00000231312.6|0|6741	1	86
ENSG00000137288.9|mRNA|UQCC2|ENSG00000137288.9|ENSG00000137288.9|0|4689	1	71
ENSG00000228878.7|lncRNA|SEPT7-AS1|ENSG00000228878.7|ENSG00000228878.7|0|4051	1	26
ENSG00000227678.7|lncRNA|AL355581.1|ENSG00000227678.7|ENSG00000227678.7|0|2906	1	76
ENSG00000137656.11|mRNA|BUD13|ENSG00000137656.11|ENSG00000137656.11|0|2196	1	76
ENSG00000226102.3|pseudogene|SEPT7P3|ENSG00000226102.3|ENSG00000226102.3|0|621	1	37
ENSG00000225762.1|lncRNA|LINC01389|ENSG00000225762.1|ENSG00000225762.1|0|483	1	56
ENSG00000224897.6|lncRNA|POT1-AS1|ENSG00000224897.6|ENSG00000224897.6|0|6304	1	49
ENSG00000092208.16|mRNA|GEMIN2|ENSG00000092208.16|ENSG00000092208.16|0|2532	1	69
ENSG00000224805.2|lncRNA|LINC00853|ENSG00000224805.2|ENSG00000224805.2|0|661	1	89
ENSG00000136573.12|mRNA|BLK|ENSG00000136573.12|ENSG00000136573.12|0|4803	1	27
ENSG00000136231.13|mRNA|IGF2BP3|ENSG00000136231.13|ENSG00000136231.13|0|8511	1	70
ENSG00000224228.2|lncRNA|AL031599.1|ENSG00000224228.2|ENSG00000224228.2|0|808	1	81
ENSG00000236548.1|lncRNA|RNF217-AS1|ENSG00000236548.1|ENSG00000236548.1|0|4507	1	95
ENSG00000250634.5|lncRNA|LINC01182|ENSG00000250634.5|ENSG00000250634.5|0|2742	1	53
ENSG00000099800.7|mRNA|TIMM13|ENSG00000099800.7|ENSG00000099800.7|0|1973	1	59
ENSG00000249898.7|lncRNA|MCPH1-AS1|ENSG00000249898.7|ENSG00000249898.7|0|3046	1	36
ENSG00000133112.16|mRNA|TPT1|ENSG00000133112.16|ENSG00000133112.16|0|7269	1	77
ENSG00000248527.1|pseudogene|MTATP6P1|ENSG00000248527.1|ENSG00000248527.1|0|681	1	31
ENSG00000133318.13|mRNA|RTN3|ENSG00000133318.13|ENSG00000133318.13|0|5792	1	67
ENSG00000133639.4|mRNA|BTG1|ENSG00000133639.4|ENSG00000133639.4|0|4854	1	75
ENSG00000248235.6|mRNA|AC037459.1|ENSG00000248235.6|ENSG00000248235.6|0|1198	1	92
ENSG00000096696.13|mRNA|DSP|ENSG00000096696.13|ENSG00000096696.13|0|10093	1	19
ENSG00000245164.6|lncRNA|LINC00861|ENSG00000245164.6|ENSG00000245164.6|0|5724	1	67
ENSG00000245008.3|lncRNA|AP001122.1|ENSG00000245008.3|ENSG00000245008.3|0|2255	1	73
ENSG00000243797.6|lncRNA|AC004917.1|ENSG00000243797.6|ENSG00000243797.6|0|2082	1	63
ENSG00000134597.15|mRNA|RBMX2|ENSG00000134597.15|ENSG00000134597.15|0|2491	1	87
ENSG00000134668.12|mRNA|SPOCD1|ENSG00000134668.12|ENSG00000134668.12|0|7085	1	96
ENSG00000134717.17|mRNA|BTF3L4|ENSG00000134717.17|ENSG00000134717.17|0|6022	1	78
ENSG00000240972.1|mRNA|MIF|ENSG00000240972.1|ENSG00000240972.1|0|1109	1	8
ENSG00000135334.8|mRNA|AKIRIN2|ENSG00000135334.8|ENSG00000135334.8|0|1999	1	93
ENSG00000240005.5|lncRNA|AC106047.1|ENSG00000240005.5|ENSG00000240005.5|0|589	1	60
ENSG00000239900.12|mRNA|ADSL|ENSG00000239900.12|ENSG00000239900.12|0|7111	1	38
ENSG00000171101.13|pseudogene|SIGLEC17P|ENSG00000171101.13|ENSG00000171101.13|0|2280	1	65
ENSG00000135535.15|mRNA|CD164|ENSG00000135535.15|ENSG00000135535.15|0|6842	1	21
ENSG00000237854.3|pseudogene|LINC00674|ENSG00000237854.3|ENSG00000237854.3|0|734	1	87
ENSG00000135637.13|mRNA|CCDC142|ENSG00000135637.13|ENSG00000135637.13|0|4897	1	59
ENSG00000237461.1|lncRNA|AL359710.1|ENSG00000237461.1|ENSG00000237461.1|0|1544	1	35
ENSG00000135709.12|mRNA|KIAA0513|ENSG00000135709.12|ENSG00000135709.12|0|8837	1	76
ENSG00000224397.5|lncRNA|SMIM25|ENSG00000224397.5|ENSG00000224397.5|0|2451	1	72
ENSG00000062524.15|mRNA|LTK|ENSG00000062524.15|ENSG00000062524.15|0|3490	1	88
ENSG00000153993.13|mRNA|SEMA3D|ENSG00000153993.13|ENSG00000153993.13|0|8062	1	57
ENSG00000146859.6|mRNA|TMEM140|ENSG00000146859.6|ENSG00000146859.6|0|2313	1	83
ENSG00000204160.11|mRNA|ZDHHC18|ENSG00000204160.11|ENSG00000204160.11|0|5436	1	87
ENSG00000203747.10|mRNA|FCGR3A|ENSG00000203747.10|ENSG00000203747.10|0|2958	1	12
ENSG00000203697.11|mRNA|CAPN8|ENSG00000203697.11|ENSG00000203697.11|0|5192	1	10
ENSG00000085760.14|mRNA|MTIF2|ENSG00000085760.14|ENSG00000085760.14|0|3374	1	23
ENSG00000147586.9|mRNA|MRPS28|ENSG00000147586.9|ENSG00000147586.9|0|1817	1	77
ENSG00000148120.16|mRNA|C9orf3|ENSG00000148120.16|ENSG00000148120.16|0|10742	1	78
ENSG00000198856.12|mRNA|OSTC|ENSG00000198856.12|ENSG00000198856.12|0|1617	1	76
ENSG00000148572.15|mRNA|NRBF2|ENSG00000148572.15|ENSG00000148572.15|0|1901	1	92
ENSG00000148671.13|mRNA|ADIRF|ENSG00000148671.13|ENSG00000148671.13|0|998	1	98
ENSG00000198589.10|mRNA|LRBA|ENSG00000198589.10|ENSG00000198589.10|0|14929	1	76
ENSG00000198586.13|mRNA|TLK1|ENSG00000198586.13|ENSG00000198586.13|0|9405	1	44
ENSG00000198574.5|mRNA|SH2D1B|ENSG00000198574.5|ENSG00000198574.5|0|2797	1	50
ENSG00000198553.8|mRNA|KCNRG|ENSG00000198553.8|ENSG00000198553.8|0|1625	1	97
ENSG00000198513.11|mRNA|ATL1|ENSG00000198513.11|ENSG00000198513.11|0|4360	1	77
ENSG00000148908.14|mRNA|RGS10|ENSG00000148908.14|ENSG00000148908.14|0|1252	1	40
ENSG00000198363.17|mRNA|ASPH|ENSG00000198363.17|ENSG00000198363.17|0|20047	1	95
ENSG00000149100.12|mRNA|EIF3M|ENSG00000149100.12|ENSG00000149100.12|0|7428	1	96
ENSG00000149516.13|mRNA|MS4A3|ENSG00000149516.13|ENSG00000149516.13|0|2095	1	49
ENSG00000084623.11|mRNA|EIF3I|ENSG00000084623.11|ENSG00000084623.11|0|1725	1	81
ENSG00000150681.9|mRNA|RGS18|ENSG00000150681.9|ENSG00000150681.9|0|2806	1	56
ENSG00000150782.11|mRNA|IL18|ENSG00000150782.11|ENSG00000150782.11|0|2628	1	97
ENSG00000083845.8|mRNA|RPS5|ENSG00000083845.8|ENSG00000083845.8|0|3617	1	76
ENSG00000065978.18|mRNA|YBX1|ENSG00000065978.18|ENSG00000065978.18|0|1930	1	46
ENSG00000197461.13|mRNA|PDGFA|ENSG00000197461.13|ENSG00000197461.13|0|4151	1	52
ENSG00000151693.10|mRNA|ASAP2|ENSG00000151693.10|ENSG00000151693.10|0|7257	1	94
ENSG00000147224.10|mRNA|PRPS1|ENSG00000147224.10|ENSG00000147224.10|0|2280	1	5
ENSG00000146232.15|mRNA|NFKBIE|ENSG00000146232.15|ENSG00000146232.15|0|2581	1	28
ENSG00000138614.14|mRNA|INTS14|ENSG00000138614.14|ENSG00000138614.14|0|4210	1	57
ENSG00000204568.11|mRNA|MRPS18B|ENSG00000204568.11|ENSG00000204568.11|0|1888	1	92
ENSG00000223865.10|mRNA|HLA-DPB1|ENSG00000223865.10|ENSG00000223865.10|0|2791	1	75
ENSG00000138798.11|mRNA|EGF|ENSG00000138798.11|ENSG00000138798.11|0|6127	1	74
ENSG00000140416.19|mRNA|TPM1|ENSG00000140416.19|ENSG00000140416.19|0|12492	1	89
ENSG00000141574.7|mRNA|SECTM1|ENSG00000141574.7|ENSG00000141574.7|0|2961	1	26
ENSG00000141698.16|mRNA|NT5C3B|ENSG00000141698.16|ENSG00000141698.16|0|2730	1	93
ENSG00000089220.4|mRNA|PEBP1|ENSG00000089220.4|ENSG00000089220.4|0|1780	1	60
ENSG00000089159.16|mRNA|PXN|ENSG00000089159.16|ENSG00000089159.16|0|7460	1	20
ENSG00000143013.12|mRNA|LMO4|ENSG00000143013.12|ENSG00000143013.12|0|5833	1	68
ENSG00000088826.17|mRNA|SMOX|ENSG00000088826.17|ENSG00000088826.17|0|2946	1	95
ENSG00000087460.24|mRNA|GNAS|ENSG00000087460.24|ENSG00000087460.24|0|13320	1	86
ENSG00000214087.8|mRNA|ARL16|ENSG00000214087.8|ENSG00000214087.8|0|2597	1	47
ENSG00000143851.15|mRNA|PTPN7|ENSG00000143851.15|ENSG00000143851.15|0|5906	1	69
ENSG00000144224.16|mRNA|UBXN4|ENSG00000144224.16|ENSG00000144224.16|0|5112	1	9
ENSG00000144381.16|mRNA|HSPD1|ENSG00000144381.16|ENSG00000144381.16|0|4245	1	89
ENSG00000144401.14|mRNA|METTL21A|ENSG00000144401.14|ENSG00000144401.14|0|6798	1	82
ENSG00000206596.1|snRNA|RNU1-27P|ENSG00000206596.1|ENSG00000206596.1|0|164	1	57
ENSG00000145191.12|mRNA|EIF2B5|ENSG00000145191.12|ENSG00000145191.12|0|5702	1	32
ENSG00000206052.10|mRNA|DOK6|ENSG00000206052.10|ENSG00000206052.10|0|9387	1	75
ENSG00000205763.13|pseudogene|RP9P|ENSG00000205763.13|ENSG00000205763.13|0|1433	1	26
ENSG00000205629.11|mRNA|LCMT1|ENSG00000205629.11|ENSG00000205629.11|0|2606	1	27
ENSG00000086589.11|mRNA|RBM22|ENSG00000086589.11|ENSG00000086589.11|0|3615	1	45
ENSG00000145740.18|mRNA|SLC30A5|ENSG00000145740.18|ENSG00000145740.18|0|5784	1	90
ENSG00000086475.14|mRNA|SEPHS1|ENSG00000086475.14|ENSG00000086475.14|0|3888	1	65
ENSG00000145912.8|mRNA|NHP2|ENSG00000145912.8|ENSG00000145912.8|0|1510	1	35
ENSG00000204822.6|mRNA|MRPL53|ENSG00000204822.6|ENSG00000204822.6|0|1344	1	24
ENSG00000169224.12|mRNA|GCSAML|ENSG00000169224.12|ENSG00000169224.12|0|4680	1	32

## Sheet: expression-colorectum-HD
feature	count	importance-rank
ENSG00000276409.4|mRNA|CCL14|ENSG00000276409.4|ENSG00000276409.4|0|3269	84	29.2262
ENSG00000275688.4|mRNA|CCL15-CCL14|ENSG00000275688.4|ENSG00000275688.4|0|1047	80	25.925
ENSG00000111276.10|mRNA|CDKN1B|ENSG00000111276.10|ENSG00000111276.10|0|2811	80	27.625
ENSG00000255448.1|lncRNA|AC055860.1|ENSG00000255448.1|ENSG00000255448.1|0|688	64	20.8438
ENSG00000077312.8|mRNA|SNRPA|ENSG00000077312.8|ENSG00000077312.8|0|2361	64	42.6875
ENSG00000105568.17|mRNA|PPP2R1A|ENSG00000105568.17|ENSG00000105568.17|0|7437	62	43.3226
ENSG00000172936.12|mRNA|MYD88|ENSG00000172936.12|ENSG00000172936.12|0|3989	57	34.4211
ENSG00000129158.10|mRNA|SERGEF|ENSG00000129158.10|ENSG00000129158.10|0|3502	56	35.7143
ENSG00000134851.12|mRNA|TMEM165|ENSG00000134851.12|ENSG00000134851.12|0|7045	50	25.64
ENSG00000143344.15|mRNA|RGL1|ENSG00000143344.15|ENSG00000143344.15|0|5305	49	45.7755
ENSG00000277957.1|mRNA|SENP3-EIF4A1|ENSG00000277957.1|ENSG00000277957.1|0|3519	48	41
ENSG00000240247.7|mRNA|DEFA1B|ENSG00000240247.7|ENSG00000240247.7|0|491	47	31.766
ENSG00000254772.9|mRNA|EEF1G|ENSG00000254772.9|ENSG00000254772.9|0|2716	47	47.1915
ENSG00000284341.1|mRNA|AL807752.7|ENSG00000284341.1|ENSG00000284341.1|0|989	46	33.6739
ENSG00000105193.8|mRNA|RPS16|ENSG00000105193.8|ENSG00000105193.8|0|2603	46	27.8913
ENSG00000155463.12|mRNA|OXA1L|ENSG00000155463.12|ENSG00000155463.12|0|4497	45	62
ENSG00000220804.8|pseudogene|LINC01881|ENSG00000220804.8|ENSG00000220804.8|0|1931	45	27.4
ENSG00000122545.18|mRNA|SEPT7|ENSG00000122545.18|ENSG00000122545.18|0|10906	44	34.6591
ENSG00000089157.15|mRNA|RPLP0|ENSG00000089157.15|ENSG00000089157.15|0|4001	44	53.6136
ENSG00000102096.9|mRNA|PIM2|ENSG00000102096.9|ENSG00000102096.9|0|2761	41	44.7805
ENSG00000255508.7|mRNA|AP002990.1|ENSG00000255508.7|ENSG00000255508.7|0|5197	41	48.9024
ENSG00000105640.12|mRNA|RPL18A|ENSG00000105640.12|ENSG00000105640.12|0|3527	40	40.85
ENSG00000215021.8|mRNA|PHB2|ENSG00000215021.8|ENSG00000215021.8|0|2499	40	25.975
ENSG00000126749.14|mRNA|EMG1|ENSG00000126749.14|ENSG00000126749.14|0|5600	40	24.1
ENSG00000165609.12|mRNA|NUDT5|ENSG00000165609.12|ENSG00000165609.12|0|4969	39	49.1538
ENSG00000161016.17|mRNA|RPL8|ENSG00000161016.17|ENSG00000161016.17|0|2159	39	62.9231
ENSG00000169100.13|mRNA|SLC25A6|ENSG00000169100.13|ENSG00000169100.13|0|2164	39	46.2308
ENSG00000173457.10|mRNA|PPP1R14B|ENSG00000173457.10|ENSG00000173457.10|0|1655	38	30.7105
ENSG00000108344.14|mRNA|PSMD3|ENSG00000108344.14|ENSG00000108344.14|0|4964	37	62.7838
ENSG00000107317.12|mRNA|PTGDS|ENSG00000107317.12|ENSG00000107317.12|0|2711	37	37.3514
hsa_circ_0070803|circRNA|hsa_circ_0070803|hsa_circ_0070803|hsa_circ_0070803|0|600	37	34.7838
ENSG00000134333.13|mRNA|LDHA|ENSG00000134333.13|ENSG00000134333.13|0|6210	37	42.0811
ENSG00000206588.1|snRNA|RNU1-28P|ENSG00000206588.1|ENSG00000206588.1|0|164	36	25.1944
ENSG00000278845.4|mRNA|MRPL45|ENSG00000278845.4|ENSG00000278845.4|0|1705	36	59
ENSG00000163738.18|mRNA|MTHFD2L|ENSG00000163738.18|ENSG00000163738.18|0|9819	36	39.1667
ENSG00000244528.1|pseudogene|SEPT14P2|ENSG00000244528.1|ENSG00000244528.1|0|183	35	36.2571
ENSG00000135749.18|mRNA|PCNX2|ENSG00000135749.18|ENSG00000135749.18|0|13815	35	39.3429
ENSG00000140988.15|mRNA|RPS2|ENSG00000140988.15|ENSG00000140988.15|0|2413	35	46.3429
ENSG00000061273.17|mRNA|HDAC7|ENSG00000061273.17|ENSG00000061273.17|0|9928	34	26.7059
hsa_circ_0030608|circRNA|hsa_circ_0030608|hsa_circ_0030608|hsa_circ_0030608|0|600	34	39.0882
ENSG00000100083.18|mRNA|GGA1|ENSG00000100083.18|ENSG00000100083.18|0|9369	34	40.9412
ENSG00000168118.11|mRNA|RAB4A|ENSG00000168118.11|ENSG00000168118.11|0|3310	34	46.4706
ENSG00000164713.9|mRNA|BRI3|ENSG00000164713.9|ENSG00000164713.9|0|5139	33	45.0909
ENSG00000169230.9|mRNA|PRELID1|ENSG00000169230.9|ENSG00000169230.9|0|1875	33	48
ENSG00000101294.16|mRNA|HM13|ENSG00000101294.16|ENSG00000101294.16|0|10000	32	38.3438
ENSG00000233927.4|mRNA|RPS28|ENSG00000233927.4|ENSG00000233927.4|0|2119	32	56.75
ENSG00000276141.4|pseudogene|WHAMMP3|ENSG00000276141.4|ENSG00000276141.4|0|7269	32	52.375
ENSG00000136933.16|mRNA|RABEPK|ENSG00000136933.16|ENSG00000136933.16|0|3401	31	59.7742
ENSG00000206596.1|snRNA|RNU1-27P|ENSG00000206596.1|ENSG00000206596.1|0|164	31	53.5484
ENSG00000189403.14|mRNA|HMGB1|ENSG00000189403.14|ENSG00000189403.14|0|7723	31	35.0645
ENSG00000167522.14|mRNA|ANKRD11|ENSG00000167522.14|ENSG00000167522.14|0|16949	31	40.7097
ENSG00000011454.16|mRNA|RABGAP1|ENSG00000011454.16|ENSG00000011454.16|0|9162	30	29.3667
ENSG00000067167.7|mRNA|TRAM1|ENSG00000067167.7|ENSG00000067167.7|0|3878	30	41.5333
ENSG00000005020.12|mRNA|SKAP2|ENSG00000005020.12|ENSG00000005020.12|0|5520	30	34.0333
ENSG00000185158.12|mRNA|LRRC37B|ENSG00000185158.12|ENSG00000185158.12|0|6281	30	34
ENSG00000075790.10|mRNA|BCAP29|ENSG00000075790.10|ENSG00000075790.10|0|8409	30	46.9667
ENSG00000081189.15|mRNA|MEF2C|ENSG00000081189.15|ENSG00000081189.15|0|11755	30	51.9333
ENSG00000100319.12|mRNA|ZMAT5|ENSG00000100319.12|ENSG00000100319.12|0|3200	30	36.1333
hsa_circ_0084021|circRNA|hsa_circ_0084021|hsa_circ_0084021|hsa_circ_0084021|0|294	29	41.2759
ENSG00000163931.15|mRNA|TKT|ENSG00000163931.15|ENSG00000163931.15|0|9507	29	35.7586
ENSG00000166153.16|mRNA|DEPDC4|ENSG00000166153.16|ENSG00000166153.16|0|3118	29	51.7931
ENSG00000180628.14|mRNA|PCGF5|ENSG00000180628.14|ENSG00000180628.14|0|8306	29	33.6552
ENSG00000187514.16|mRNA|PTMA|ENSG00000187514.16|ENSG00000187514.16|0|3378	28	46.7143
ENSG00000156110.13|mRNA|ADK|ENSG00000156110.13|ENSG00000156110.13|0|3184	28	32.8929
ENSG00000279738.1|lncRNA|AL022311.1|ENSG00000279738.1|ENSG00000279738.1|0|19416	27	52.1111
ENSG00000167526.13|mRNA|RPL13|ENSG00000167526.13|ENSG00000167526.13|0|6172	26	74.0385
ENSG00000128989.10|mRNA|ARPP19|ENSG00000128989.10|ENSG00000128989.10|0|6917	26	33.5769
ENSG00000124614.13|mRNA|RPS10|ENSG00000124614.13|ENSG00000124614.13|0|1642	26	56.4615
ENSG00000148655.14|mRNA|LRMDA|ENSG00000148655.14|ENSG00000148655.14|0|6560	26	48.2308
ENSG00000164086.9|mRNA|DUSP7|ENSG00000164086.9|ENSG00000164086.9|0|5648	26	62.2308
ENSG00000084092.6|mRNA|NOA1|ENSG00000084092.6|ENSG00000084092.6|0|3415	26	38.2692
ENSG00000115207.13|mRNA|GTF3C2|ENSG00000115207.13|ENSG00000115207.13|0|5839	25	41.92
ENSG00000005471.15|mRNA|ABCB4|ENSG00000005471.15|ENSG00000005471.15|0|7494	25	37.88
ENSG00000162373.12|mRNA|BEND5|ENSG00000162373.12|ENSG00000162373.12|0|2138	24	23.375
ENSG00000148154.9|mRNA|UGCG|ENSG00000148154.9|ENSG00000148154.9|0|4615	24	37.5833
ENSG00000102317.17|mRNA|RBM3|ENSG00000102317.17|ENSG00000102317.17|0|3731	24	56.9583
ENSG00000135297.15|mRNA|MTO1|ENSG00000135297.15|ENSG00000135297.15|0|12071	24	47.7917
ENSG00000239839.6|mRNA|DEFA3|ENSG00000239839.6|ENSG00000239839.6|0|498	24	52.7083
ENSG00000231500.6|mRNA|RPS18|ENSG00000231500.6|ENSG00000231500.6|0|1898	23	62.7826
ENSG00000096968.13|mRNA|JAK2|ENSG00000096968.13|ENSG00000096968.13|0|6170	23	45.1304
ENSG00000161960.14|mRNA|EIF4A1|ENSG00000161960.14|ENSG00000161960.14|0|5316	23	37.4348
ENSG00000130811.11|mRNA|EIF3G|ENSG00000130811.11|ENSG00000130811.11|0|3486	23	38.5217
ENSG00000069399.14|mRNA|BCL3|ENSG00000069399.14|ENSG00000069399.14|0|3242	23	54.3478
ENSG00000155465.18|mRNA|SLC7A7|ENSG00000155465.18|ENSG00000155465.18|0|5131	23	63.087
ENSG00000105808.17|mRNA|RASA4|ENSG00000105808.17|ENSG00000105808.17|0|8077	23	50.1304
ENSG00000130726.11|mRNA|TRIM28|ENSG00000130726.11|ENSG00000130726.11|0|4034	22	37.2727
ENSG00000122779.17|mRNA|TRIM24|ENSG00000122779.17|ENSG00000122779.17|0|9223	22	31.2727
ENSG00000105963.13|mRNA|ADAP1|ENSG00000105963.13|ENSG00000105963.13|0|5062	22	45.5455
ENSG00000163681.14|mRNA|SLMAP|ENSG00000163681.14|ENSG00000163681.14|0|14147	22	52.1818
ENSG00000147403.16|mRNA|RPL10|ENSG00000147403.16|ENSG00000147403.16|0|4825	22	67.4545
ENSG00000168028.13|mRNA|RPSA|ENSG00000168028.13|ENSG00000168028.13|0|3936	22	55.5
ENSG00000170889.13|mRNA|RPS9|ENSG00000170889.13|ENSG00000170889.13|0|4371	22	46.8636
ENSG00000149292.16|mRNA|TTC12|ENSG00000149292.16|ENSG00000149292.16|0|5302	22	40.5
ENSG00000172340.14|mRNA|SUCLG2|ENSG00000172340.14|ENSG00000172340.14|0|3090	21	50.0952
ENSG00000147526.19|mRNA|TACC1|ENSG00000147526.19|ENSG00000147526.19|0|12609	21	58.1429
ENSG00000116288.12|mRNA|PARK7|ENSG00000116288.12|ENSG00000116288.12|0|2397	21	48.0476
ENSG00000145919.10|mRNA|BOD1|ENSG00000145919.10|ENSG00000145919.10|0|2018	21	56.7143
ENSG00000070761.7|mRNA|CFAP20|ENSG00000070761.7|ENSG00000070761.7|0|2375	21	47.381
ENSG00000239998.5|mRNA|LILRA2|ENSG00000239998.5|ENSG00000239998.5|0|5349	20	28.7
ENSG00000141568.20|mRNA|FOXK2|ENSG00000141568.20|ENSG00000141568.20|0|9991	20	40.1
ENSG00000280571.1|mRNA|AC099329.3|ENSG00000280571.1|ENSG00000280571.1|0|602	20	57.55
ENSG00000213995.11|mRNA|NAXD|ENSG00000213995.11|ENSG00000213995.11|0|2847	20	49.85
ENSG00000181038.13|mRNA|METTL23|ENSG00000181038.13|ENSG00000181038.13|0|1914	20	40.6
ENSG00000149557.12|mRNA|FEZ1|ENSG00000149557.12|ENSG00000149557.12|0|5937	20	41.8
ENSG00000122026.10|mRNA|RPL21|ENSG00000122026.10|ENSG00000122026.10|0|2249	19	49.5263
ENSG00000026025.15|mRNA|VIM|ENSG00000026025.15|ENSG00000026025.15|0|5158	19	48.2105
ENSG00000104960.15|mRNA|PTOV1|ENSG00000104960.15|ENSG00000104960.15|0|5962	18	61.5556
ENSG00000144909.7|mRNA|OSBPL11|ENSG00000144909.7|ENSG00000144909.7|0|4191	18	52.6111
ENSG00000114023.15|mRNA|FAM162A|ENSG00000114023.15|ENSG00000114023.15|0|3793	18	51.6667
ENSG00000109171.14|mRNA|SLAIN2|ENSG00000109171.14|ENSG00000109171.14|0|6524	18	71.2222
ENSG00000143622.10|mRNA|RIT1|ENSG00000143622.10|ENSG00000143622.10|0|3919	18	58.5
ENSG00000185201.16|mRNA|IFITM2|ENSG00000185201.16|ENSG00000185201.16|0|1543	18	40.0556
ENSG00000234961.1|lncRNA|AL133415.1|ENSG00000234961.1|ENSG00000234961.1|0|706	18	62.3889
ENSG00000105516.10|mRNA|DBP|ENSG00000105516.10|ENSG00000105516.10|0|6544	18	48.7778
hsa_circ_0001770|circRNA|hsa_circ_0001770|hsa_circ_0001770|hsa_circ_0001770|0|456	18	40.1667
hsa_circ_0006659|circRNA|hsa_circ_0006659|hsa_circ_0006659|hsa_circ_0006659|0|600	18	48.8333
ENSG00000138629.15|mRNA|UBL7|ENSG00000138629.15|ENSG00000138629.15|0|1885	18	41.4444
ENSG00000185697.16|mRNA|MYBL1|ENSG00000185697.16|ENSG00000185697.16|0|7239	18	59
ENSG00000134419.15|mRNA|RPS15A|ENSG00000134419.15|ENSG00000134419.15|0|6679	18	56.1111
ENSG00000257267.3|pseudogene|ZNF271P|ENSG00000257267.3|ENSG00000257267.3|0|7450	18	72.8333
ENSG00000110700.6|mRNA|RPS13|ENSG00000110700.6|ENSG00000110700.6|0|2186	18	60.2222
ENSG00000130255.12|mRNA|RPL36|ENSG00000130255.12|ENSG00000130255.12|0|2272	17	50.1765
ENSG00000077238.13|mRNA|IL4R|ENSG00000077238.13|ENSG00000077238.13|0|5894	17	56.3529
ENSG00000120265.16|mRNA|PCMT1|ENSG00000120265.16|ENSG00000120265.16|0|2832	17	44.5882
ENSG00000085662.13|mRNA|AKR1B1|ENSG00000085662.13|ENSG00000085662.13|0|3660	17	41.9412
ENSG00000185507.19|mRNA|IRF7|ENSG00000185507.19|ENSG00000185507.19|0|2628	17	48.6471
ENSG00000063177.12|mRNA|RPL18|ENSG00000063177.12|ENSG00000063177.12|0|4209	17	68.4118
ENSG00000267787.5|lncRNA|AC027097.2|ENSG00000267787.5|ENSG00000267787.5|0|2032	17	24.7647
ENSG00000187109.13|mRNA|NAP1L1|ENSG00000187109.13|ENSG00000187109.13|0|17355	17	49.1176
ENSG00000100300.17|mRNA|TSPO|ENSG00000100300.17|ENSG00000100300.17|0|1455	17	66.3529
ENSG00000102879.15|mRNA|CORO1A|ENSG00000102879.15|ENSG00000102879.15|0|4871	17	35.8235
ENSG00000169429.10|mRNA|CXCL8|ENSG00000169429.10|ENSG00000169429.10|0|2274	17	52.4706
ENSG00000102172.15|mRNA|SMS|ENSG00000102172.15|ENSG00000102172.15|0|2160	17	44.4706
ENSG00000171777.15|mRNA|RASGRP4|ENSG00000171777.15|ENSG00000171777.15|0|4183	17	54.5882
ENSG00000125743.10|mRNA|SNRPD2|ENSG00000125743.10|ENSG00000125743.10|0|1608	16	49.9375
ENSG00000181061.13|mRNA|HIGD1A|ENSG00000181061.13|ENSG00000181061.13|0|1675	16	56.3125
ENSG00000163631.16|mRNA|ALB|ENSG00000163631.16|ENSG00000163631.16|0|3377	16	46.6875
ENSG00000167515.10|mRNA|TRAPPC2L|ENSG00000167515.10|ENSG00000167515.10|0|4463	16	55.875
ENSG00000100453.12|mRNA|GZMB|ENSG00000100453.12|ENSG00000100453.12|0|1411	16	42.375
ENSG00000114125.13|mRNA|RNF7|ENSG00000114125.13|ENSG00000114125.13|0|3147	16	38.5
ENSG00000156508.17|mRNA|EEF1A1|ENSG00000156508.17|ENSG00000156508.17|0|5948	16	68.5625
ENSG00000003436.15|mRNA|TFPI|ENSG00000003436.15|ENSG00000003436.15|0|11714	16	51.6875
ENSG00000151276.23|mRNA|MAGI1|ENSG00000151276.23|ENSG00000151276.23|0|11649	16	64.6875
ENSG00000011600.11|mRNA|TYROBP|ENSG00000011600.11|ENSG00000011600.11|0|907	16	48.9375
ENSG00000152082.13|mRNA|MZT2B|ENSG00000152082.13|ENSG00000152082.13|0|1815	16	65.6875
ENSG00000196511.14|mRNA|TPK1|ENSG00000196511.14|ENSG00000196511.14|0|8442	16	43.1875
ENSG00000168522.12|mRNA|FNTA|ENSG00000168522.12|ENSG00000168522.12|0|9551	16	47
ENSG00000268173.3|mRNA|AC007192.1|ENSG00000268173.3|ENSG00000268173.3|0|5142	15	70.4
ENSG00000009780.15|mRNA|FAM76A|ENSG00000009780.15|ENSG00000009780.15|0|4034	15	46.8667
ENSG00000063438.16|mRNA|AHRR|ENSG00000063438.16|ENSG00000063438.16|0|7678	15	44.0667
ENSG00000120708.16|mRNA|TGFBI|ENSG00000120708.16|ENSG00000120708.16|0|7810	15	43.9333
ENSG00000165283.15|mRNA|STOML2|ENSG00000165283.15|ENSG00000165283.15|0|1806	15	51.8667
ENSG00000160593.18|mRNA|JAML|ENSG00000160593.18|ENSG00000160593.18|0|8587	15	51.8
ENSG00000196502.11|mRNA|SULT1A1|ENSG00000196502.11|ENSG00000196502.11|0|8909	15	65
ENSG00000132603.13|mRNA|NIP7|ENSG00000132603.13|ENSG00000132603.13|0|3274	15	39.1333
ENSG00000100575.13|mRNA|TIMM9|ENSG00000100575.13|ENSG00000100575.13|0|1500	15	56.5333
ENSG00000039560.13|mRNA|RAI14|ENSG00000039560.13|ENSG00000039560.13|0|7687	15	58.9333
ENSG00000243701.5|lncRNA|DUBR|ENSG00000243701.5|ENSG00000243701.5|0|4206	15	69.5333
hsa_circ_0003356|circRNA|hsa_circ_0003356|hsa_circ_0003356|hsa_circ_0003356|0|540	15	21
ENSG00000265625.1|lncRNA|AC104564.6|ENSG00000265625.1|ENSG00000265625.1|0|1052	15	49.6667
ENSG00000169877.9|mRNA|AHSP|ENSG00000169877.9|ENSG00000169877.9|0|562	15	49.5333
ENSG00000266472.5|mRNA|MRPS21|ENSG00000266472.5|ENSG00000266472.5|0|1641	15	57.1333
ENSG00000136942.14|mRNA|RPL35|ENSG00000136942.14|ENSG00000136942.14|0|1535	15	57.4667
hsa_circ_0018889|circRNA|hsa_circ_0018889|hsa_circ_0018889|hsa_circ_0018889|0|558	15	31.2667
ENSG00000197958.12|mRNA|RPL12|ENSG00000197958.12|ENSG00000197958.12|0|2452	15	66.4667
ENSG00000138378.17|mRNA|STAT4|ENSG00000138378.17|ENSG00000138378.17|0|4250	15	54.8667
ENSG00000012061.15|mRNA|ERCC1|ENSG00000012061.15|ENSG00000012061.15|0|5576	14	51.3571
ENSG00000167508.11|mRNA|MVD|ENSG00000167508.11|ENSG00000167508.11|0|4717	14	47.7857
ENSG00000141574.7|mRNA|SECTM1|ENSG00000141574.7|ENSG00000141574.7|0|2961	14	47.2857
ENSG00000147168.12|mRNA|IL2RG|ENSG00000147168.12|ENSG00000147168.12|0|2760	14	38.6429
ENSG00000267009.6|lncRNA|AC007780.1|ENSG00000267009.6|ENSG00000267009.6|0|1863	14	58.8571
ENSG00000176986.15|mRNA|SEC24C|ENSG00000176986.15|ENSG00000176986.15|0|5341	14	57.9286
ENSG00000186088.15|mRNA|GSAP|ENSG00000186088.15|ENSG00000186088.15|0|9001	14	59.7143
ENSG00000280195.1|lncRNA|AC245140.2|ENSG00000280195.1|ENSG00000280195.1|0|1939	14	57.1429
ENSG00000184060.10|mRNA|ADAP2|ENSG00000184060.10|ENSG00000184060.10|0|3750	14	57.4286
ENSG00000125538.11|mRNA|IL1B|ENSG00000125538.11|ENSG00000125538.11|0|3096	14	37.2143
ENSG00000078618.21|mRNA|NRDC|ENSG00000078618.21|ENSG00000078618.21|0|6773	14	68.5
ENSG00000127054.20|mRNA|INTS11|ENSG00000127054.20|ENSG00000127054.20|0|8220	14	47.0714
ENSG00000073756.11|mRNA|PTGS2|ENSG00000073756.11|ENSG00000073756.11|0|5269	14	30.0714
ENSG00000114737.15|mRNA|CISH|ENSG00000114737.15|ENSG00000114737.15|0|5112	14	46.7857
ENSG00000110777.11|mRNA|POU2AF1|ENSG00000110777.11|ENSG00000110777.11|0|7416	14	65.8571
ENSG00000112893.9|mRNA|MAN2A1|ENSG00000112893.9|ENSG00000112893.9|0|11815	14	46.7143
ENSG00000137845.14|mRNA|ADAM10|ENSG00000137845.14|ENSG00000137845.14|0|16168	14	73.2143
ENSG00000214517.9|mRNA|PPME1|ENSG00000214517.9|ENSG00000214517.9|0|7917	14	38.8571
ENSG00000224137.1|lncRNA|LINC01857|ENSG00000224137.1|ENSG00000224137.1|0|492	14	46.8571
ENSG00000214212.8|mRNA|C19orf38|ENSG00000214212.8|ENSG00000214212.8|0|1565	14	41.5
ENSG00000100129.17|mRNA|EIF3L|ENSG00000100129.17|ENSG00000100129.17|0|4296	14	45.1429
ENSG00000145723.16|mRNA|GIN1|ENSG00000145723.16|ENSG00000145723.16|0|4182	13	56.1538
ENSG00000235288.3|lncRNA|AC099329.1|ENSG00000235288.3|ENSG00000235288.3|0|1956	13	56.4615
ENSG00000112306.7|mRNA|RPS12|ENSG00000112306.7|ENSG00000112306.7|0|767	13	61.2308
ENSG00000011451.17|mRNA|WIZ|ENSG00000011451.17|ENSG00000011451.17|0|7965	13	32.4615
ENSG00000143319.16|mRNA|ISG20L2|ENSG00000143319.16|ENSG00000143319.16|0|5262	13	45.8462
hsa_circ_0088038|circRNA|hsa_circ_0088038|hsa_circ_0088038|hsa_circ_0088038|0|600	13	46.1538
ENSG00000107829.13|mRNA|FBXW4|ENSG00000107829.13|ENSG00000107829.13|0|5038	13	63.7692
ENSG00000116678.19|mRNA|LEPR|ENSG00000116678.19|ENSG00000116678.19|0|11370	13	49
ENSG00000198034.10|mRNA|RPS4X|ENSG00000198034.10|ENSG00000198034.10|0|2982	13	62.6923
ENSG00000235162.8|mRNA|C12orf75|ENSG00000235162.8|ENSG00000235162.8|0|2693	13	46.2308
ENSG00000198755.10|mRNA|RPL10A|ENSG00000198755.10|ENSG00000198755.10|0|1501	13	68.3846
ENSG00000186468.12|mRNA|RPS23|ENSG00000186468.12|ENSG00000186468.12|0|4204	13	62.3846
ENSG00000167986.13|mRNA|DDB1|ENSG00000167986.13|ENSG00000167986.13|0|13950	13	63.5385
ENSG00000149273.14|mRNA|RPS3|ENSG00000149273.14|ENSG00000149273.14|0|5894	13	60.3846
ENSG00000182093.14|mRNA|WRB|ENSG00000182093.14|ENSG00000182093.14|0|5558	13	36
ENSG00000085514.15|mRNA|PILRA|ENSG00000085514.15|ENSG00000085514.15|0|2006	13	52.7692
ENSG00000131759.17|mRNA|RARA|ENSG00000131759.17|ENSG00000131759.17|0|4731	13	54.7692
ENSG00000182287.14|mRNA|AP1S2|ENSG00000182287.14|ENSG00000182287.14|0|5371	13	46.2308
ENSG00000162894.11|mRNA|FCMR|ENSG00000162894.11|ENSG00000162894.11|0|2348	13	59.1538
ENSG00000149823.8|mRNA|VPS51|ENSG00000149823.8|ENSG00000149823.8|0|4878	13	49.0769
ENSG00000213145.9|mRNA|CRIP1|ENSG00000213145.9|ENSG00000213145.9|0|2485	13	36.4615
ENSG00000231131.6|lncRNA|LINC01468|ENSG00000231131.6|ENSG00000231131.6|0|1177	13	46.8462
ENSG00000109686.17|mRNA|SH3D19|ENSG00000109686.17|ENSG00000109686.17|0|7789	13	61
ENSG00000090554.12|mRNA|FLT3LG|ENSG00000090554.12|ENSG00000090554.12|0|2846	13	17.6923
ENSG00000106636.7|mRNA|YKT6|ENSG00000106636.7|ENSG00000106636.7|0|3707	12	19.25
ENSG00000142937.11|mRNA|RPS8|ENSG00000142937.11|ENSG00000142937.11|0|2847	12	60.0833
ENSG00000131171.12|mRNA|SH3BGRL|ENSG00000131171.12|ENSG00000131171.12|0|2304	12	47.3333
ENSG00000183617.4|mRNA|MRPL54|ENSG00000183617.4|ENSG00000183617.4|0|1003	12	38.25
hsa_circ_0004863|circRNA|hsa_circ_0004863|hsa_circ_0004863|hsa_circ_0004863|0|356	12	65.8333
ENSG00000072657.8|mRNA|TRHDE|ENSG00000072657.8|ENSG00000072657.8|0|11950	12	59
ENSG00000125991.19|mRNA|ERGIC3|ENSG00000125991.19|ENSG00000125991.19|0|6012	12	58.75
ENSG00000251636.1|lncRNA|LINC01218|ENSG00000251636.1|ENSG00000251636.1|0|481	12	47.9167
ENSG00000114391.12|mRNA|RPL24|ENSG00000114391.12|ENSG00000114391.12|0|2682	12	38.9167
ENSG00000081791.8|mRNA|KIAA0141|ENSG00000081791.8|ENSG00000081791.8|0|6047	12	68.0833
ENSG00000111341.9|mRNA|MGP|ENSG00000111341.9|ENSG00000111341.9|0|2639	12	70.1667
ENSG00000170935.7|mRNA|NCBP2L|ENSG00000170935.7|ENSG00000170935.7|0|2079	12	44.1667
ENSG00000172053.17|mRNA|QARS|ENSG00000172053.17|ENSG00000172053.17|0|4708	12	59.3333
ENSG00000090447.11|mRNA|TFAP4|ENSG00000090447.11|ENSG00000090447.11|0|7867	12	29.9167
ENSG00000108953.16|mRNA|YWHAE|ENSG00000108953.16|ENSG00000108953.16|0|3847	12	33.5833
ENSG00000108389.9|mRNA|MTMR4|ENSG00000108389.9|ENSG00000108389.9|0|7475	12	57.5
ENSG00000266786.1|pseudogene|LGALS9DP|ENSG00000266786.1|ENSG00000266786.1|0|764	12	47.5833
ENSG00000173960.13|mRNA|UBXN2A|ENSG00000173960.13|ENSG00000173960.13|0|6882	12	51.3333
ENSG00000137133.10|mRNA|HINT2|ENSG00000137133.10|ENSG00000137133.10|0|2395	12	57.0833
ENSG00000257341.5|mRNA|AL928654.4|ENSG00000257341.5|ENSG00000257341.5|0|1408	12	37.1667
ENSG00000121897.14|mRNA|LIAS|ENSG00000121897.14|ENSG00000121897.14|0|11735	12	43.1667
ENSG00000135315.11|mRNA|CEP162|ENSG00000135315.11|ENSG00000135315.11|0|5474	12	49.9167
ENSG00000265257.5|lncRNA|AP005263.1|ENSG00000265257.5|ENSG00000265257.5|0|1050	12	53.25
ENSG00000206337.10|lncRNA|HCP5|ENSG00000206337.10|ENSG00000206337.10|0|3138	12	57.75
ENSG00000167641.10|mRNA|PPP1R14A|ENSG00000167641.10|ENSG00000167641.10|0|1501	11	24.3636
ENSG00000111639.7|mRNA|MRPL51|ENSG00000111639.7|ENSG00000111639.7|0|1551	11	49.3636
ENSG00000113552.15|mRNA|GNPDA1|ENSG00000113552.15|ENSG00000113552.15|0|3961	11	55.6364
ENSG00000108946.14|mRNA|PRKAR1A|ENSG00000108946.14|ENSG00000108946.14|0|6821	11	37.4545
ENSG00000110031.12|mRNA|LPXN|ENSG00000110031.12|ENSG00000110031.12|0|2467	11	50.4545
ENSG00000169567.11|mRNA|HINT1|ENSG00000169567.11|ENSG00000169567.11|0|1936	11	65.9091
ENSG00000118579.12|mRNA|MED28|ENSG00000118579.12|ENSG00000118579.12|0|10982	11	57.5455
ENSG00000135486.17|mRNA|HNRNPA1|ENSG00000135486.17|ENSG00000135486.17|0|5093	11	55.5455
ENSG00000079841.18|mRNA|RIMS1|ENSG00000079841.18|ENSG00000079841.18|0|12788	11	43.6364
ENSG00000162639.15|mRNA|HENMT1|ENSG00000162639.15|ENSG00000162639.15|0|2426	11	39.4545
ENSG00000148303.16|mRNA|RPL7A|ENSG00000148303.16|ENSG00000148303.16|0|2242	11	74.8182
ENSG00000069702.10|mRNA|TGFBR3|ENSG00000069702.10|ENSG00000069702.10|0|8705	11	47.2727
ENSG00000018189.12|mRNA|RUFY3|ENSG00000018189.12|ENSG00000018189.12|0|8070	11	47.3636
ENSG00000141101.12|mRNA|NOB1|ENSG00000141101.12|ENSG00000141101.12|0|2119	11	51.4545
ENSG00000145741.15|mRNA|BTF3|ENSG00000145741.15|ENSG00000145741.15|0|2467	11	69.1818
ENSG00000142676.12|mRNA|RPL11|ENSG00000142676.12|ENSG00000142676.12|0|1987	11	47.7273
ENSG00000132676.15|mRNA|DAP3|ENSG00000132676.15|ENSG00000132676.15|0|4588	11	56
ENSG00000100599.15|mRNA|RIN3|ENSG00000100599.15|ENSG00000100599.15|0|8683	11	60
ENSG00000239961.2|mRNA|LILRA4|ENSG00000239961.2|ENSG00000239961.2|0|2171	11	41.7273
ENSG00000100991.11|mRNA|TRPC4AP|ENSG00000100991.11|ENSG00000100991.11|0|3226	11	52.9091
ENSG00000114942.13|mRNA|EEF1B2|ENSG00000114942.13|ENSG00000114942.13|0|1915	11	65.9091
ENSG00000279444.1|lncRNA|AC135584.1|ENSG00000279444.1|ENSG00000279444.1|0|333	11	54.5455
ENSG00000131401.11|pseudogene|NAPSB|ENSG00000131401.11|ENSG00000131401.11|0|1915	11	48.4545
ENSG00000143546.9|mRNA|S100A8|ENSG00000143546.9|ENSG00000143546.9|0|1006	11	69.8182
ENSG00000121350.15|mRNA|PYROXD1|ENSG00000121350.15|ENSG00000121350.15|0|5725	11	53
ENSG00000152270.8|mRNA|PDE3B|ENSG00000152270.8|ENSG00000152270.8|0|11707	10	25.5
ENSG00000254979.5|mRNA|AP000781.2|ENSG00000254979.5|ENSG00000254979.5|0|2242	10	43.2
ENSG00000173221.13|mRNA|GLRX|ENSG00000173221.13|ENSG00000173221.13|0|6508	10	54.4
ENSG00000136156.12|mRNA|ITM2B|ENSG00000136156.12|ENSG00000136156.12|0|10210	10	44.9
ENSG00000204160.11|mRNA|ZDHHC18|ENSG00000204160.11|ENSG00000204160.11|0|5436	10	76.3
ENSG00000136718.9|mRNA|IMP4|ENSG00000136718.9|ENSG00000136718.9|0|3861	10	60.3
ENSG00000236411.1|pseudogene|NDUFAF4P3|ENSG00000236411.1|ENSG00000236411.1|0|525	10	43.4
ENSG00000198821.10|mRNA|CD247|ENSG00000198821.10|ENSG00000198821.10|0|4034	10	50.8
ENSG00000197345.12|mRNA|MRPL21|ENSG00000197345.12|ENSG00000197345.12|0|2825	10	34.6
ENSG00000107679.14|mRNA|PLEKHA1|ENSG00000107679.14|ENSG00000107679.14|0|23986	10	64.2
ENSG00000197956.9|mRNA|S100A6|ENSG00000197956.9|ENSG00000197956.9|0|971	10	44.3
ENSG00000183527.11|mRNA|PSMG1|ENSG00000183527.11|ENSG00000183527.11|0|2515	10	45.8
ENSG00000125676.19|mRNA|THOC2|ENSG00000125676.19|ENSG00000125676.19|0|10277	10	66.4
ENSG00000111203.11|mRNA|ITFG2|ENSG00000111203.11|ENSG00000111203.11|0|6250	10	56.3
ENSG00000182199.10|mRNA|SHMT2|ENSG00000182199.10|ENSG00000182199.10|0|4838	10	45
ENSG00000100077.14|mRNA|GRK3|ENSG00000100077.14|ENSG00000100077.14|0|9303	10	63.6
ENSG00000163220.10|mRNA|S100A9|ENSG00000163220.10|ENSG00000163220.10|0|577	10	47.6
ENSG00000164741.14|mRNA|DLC1|ENSG00000164741.14|ENSG00000164741.14|0|12794	10	55
ENSG00000100385.13|mRNA|IL2RB|ENSG00000100385.13|ENSG00000100385.13|0|4700	10	41.5
ENSG00000162636.15|mRNA|FAM102B|ENSG00000162636.15|ENSG00000162636.15|0|9355	10	49
ENSG00000126217.20|mRNA|MCF2L|ENSG00000126217.20|ENSG00000126217.20|0|23148	10	66.4
ENSG00000156711.16|mRNA|MAPK13|ENSG00000156711.16|ENSG00000156711.16|0|7197	10	57.9
hsa_circ_0032965|circRNA|hsa_circ_0032965|hsa_circ_0032965|hsa_circ_0032965|0|600	10	42.6
hsa_circ_0030585|circRNA|hsa_circ_0030585|hsa_circ_0030585|hsa_circ_0030585|0|600	10	36.6
ENSG00000173442.12|mRNA|EHBP1L1|ENSG00000173442.12|ENSG00000173442.12|0|6741	10	52.1
ENSG00000101425.12|mRNA|BPI|ENSG00000101425.12|ENSG00000101425.12|0|5626	10	45.8
ENSG00000156127.6|mRNA|BATF|ENSG00000156127.6|ENSG00000156127.6|0|980	10	35.9
ENSG00000243678.11|mRNA|NME2|ENSG00000243678.11|ENSG00000243678.11|0|2632	10	57.4
ENSG00000143353.11|mRNA|LYPLAL1|ENSG00000143353.11|ENSG00000143353.11|0|2966	9	30.8889
ENSG00000164405.10|mRNA|UQCRQ|ENSG00000164405.10|ENSG00000164405.10|0|1472	9	53.6667
ENSG00000145425.9|mRNA|RPS3A|ENSG00000145425.9|ENSG00000145425.9|0|2341	9	62.3333
ENSG00000143119.12|mRNA|CD53|ENSG00000143119.12|ENSG00000143119.12|0|2080	9	42.2222
ENSG00000165322.17|mRNA|ARHGAP12|ENSG00000165322.17|ENSG00000165322.17|0|5938	9	56.3333
ENSG00000198168.8|mRNA|SVIP|ENSG00000198168.8|ENSG00000198168.8|0|5263	9	50.1111
ENSG00000138758.11|mRNA|SEPT11|ENSG00000138758.11|ENSG00000138758.11|0|9787	9	59.5556
ENSG00000130813.17|mRNA|C19orf66|ENSG00000130813.17|ENSG00000130813.17|0|4341	9	66
ENSG00000136826.14|mRNA|KLF4|ENSG00000136826.14|ENSG00000136826.14|0|3659	9	66.1111
ENSG00000120913.23|mRNA|PDLIM2|ENSG00000120913.23|ENSG00000120913.23|0|12388	9	51.1111
ENSG00000160221.16|mRNA|C21orf33|ENSG00000160221.16|ENSG00000160221.16|0|3108	9	51.5556
ENSG00000268439.5|mRNA|EMG1|ENSG00000268439.5|ENSG00000268439.5|0|1292	9	50.3333
ENSG00000110057.7|mRNA|UNC93B1|ENSG00000110057.7|ENSG00000110057.7|0|3548	9	28.2222
ENSG00000156709.13|mRNA|AIFM1|ENSG00000156709.13|ENSG00000156709.13|0|3306	9	39.4444
ENSG00000131966.13|mRNA|ACTR10|ENSG00000131966.13|ENSG00000131966.13|0|4039	9	29.5556
ENSG00000130699.18|mRNA|TAF4|ENSG00000130699.18|ENSG00000130699.18|0|9808	9	47.3333
hsa_circ_0008158|circRNA|hsa_circ_0008158|hsa_circ_0008158|hsa_circ_0008158|0|600	9	37
ENSG00000068796.16|mRNA|KIF2A|ENSG00000068796.16|ENSG00000068796.16|0|4774	9	42.2222
ENSG00000178234.12|mRNA|GALNT11|ENSG00000178234.12|ENSG00000178234.12|0|8295	9	57.4444
ENSG00000105397.13|mRNA|TYK2|ENSG00000105397.13|ENSG00000105397.13|0|6773	9	72.6667
ENSG00000170836.11|mRNA|PPM1D|ENSG00000170836.11|ENSG00000170836.11|0|5044	9	55.6667
ENSG00000100364.18|mRNA|KIAA0930|ENSG00000100364.18|ENSG00000100364.18|0|10019	9	41.8889
ENSG00000034713.7|mRNA|GABARAPL2|ENSG00000034713.7|ENSG00000034713.7|0|3034	9	53.1111
ENSG00000205336.11|mRNA|ADGRG1|ENSG00000205336.11|ENSG00000205336.11|0|8659	9	49.4444
hsa_circ_0036250|circRNA|hsa_circ_0036250|hsa_circ_0036250|hsa_circ_0036250|0|600	9	43.6667
ENSG00000102007.10|mRNA|PLP2|ENSG00000102007.10|ENSG00000102007.10|0|1279	9	54.5556
ENSG00000172732.11|mRNA|MUS81|ENSG00000172732.11|ENSG00000172732.11|0|5476	9	52.3333
ENSG00000070423.17|mRNA|RNF126|ENSG00000070423.17|ENSG00000070423.17|0|3496	9	63.7778
ENSG00000197442.9|mRNA|MAP3K5|ENSG00000197442.9|ENSG00000197442.9|0|5303	9	43.8889
ENSG00000173852.14|mRNA|DPY19L1|ENSG00000173852.14|ENSG00000173852.14|0|6278	9	65
ENSG00000102978.12|mRNA|POLR2C|ENSG00000102978.12|ENSG00000102978.12|0|3940	9	72.6667
ENSG00000086189.9|mRNA|DIMT1|ENSG00000086189.9|ENSG00000086189.9|0|3736	9	58.8889
ENSG00000132386.10|mRNA|SERPINF1|ENSG00000132386.10|ENSG00000132386.10|0|3069	8	41.125
ENSG00000248905.8|mRNA|FMN1|ENSG00000248905.8|ENSG00000248905.8|0|20084	8	40
ENSG00000132122.11|mRNA|SPATA6|ENSG00000132122.11|ENSG00000132122.11|0|5939	8	34.125
ENSG00000175390.13|mRNA|EIF3F|ENSG00000175390.13|ENSG00000175390.13|0|9431	8	66.125
ENSG00000131724.10|mRNA|IL13RA1|ENSG00000131724.10|ENSG00000131724.10|0|4372	8	82.875
ENSG00000095370.19|mRNA|SH2D3C|ENSG00000095370.19|ENSG00000095370.19|0|4659	8	47.625
ENSG00000177030.16|mRNA|DEAF1|ENSG00000177030.16|ENSG00000177030.16|0|4452	8	43.5
ENSG00000161940.10|mRNA|BCL6B|ENSG00000161940.10|ENSG00000161940.10|0|4373	8	63.625
ENSG00000101084.17|mRNA|C20orf24|ENSG00000101084.17|ENSG00000101084.17|0|1549	8	54.125
ENSG00000121552.3|mRNA|CSTA|ENSG00000121552.3|ENSG00000121552.3|0|1373	8	67
ENSG00000183020.13|mRNA|AP2A2|ENSG00000183020.13|ENSG00000183020.13|0|9638	8	53
ENSG00000156171.14|mRNA|DRAM2|ENSG00000156171.14|ENSG00000156171.14|0|3138	8	56.625
ENSG00000102103.15|mRNA|PQBP1|ENSG00000102103.15|ENSG00000102103.15|0|1903	8	72.375
ENSG00000159399.9|mRNA|HK2|ENSG00000159399.9|ENSG00000159399.9|0|6064	8	50
ENSG00000082014.16|mRNA|SMARCD3|ENSG00000082014.16|ENSG00000082014.16|0|5198	8	42.25
ENSG00000106799.12|mRNA|TGFBR1|ENSG00000106799.12|ENSG00000106799.12|0|6844	8	59.875
ENSG00000168216.10|mRNA|LMBRD1|ENSG00000168216.10|ENSG00000168216.10|0|2402	8	44
ENSG00000115268.9|mRNA|RPS15|ENSG00000115268.9|ENSG00000115268.9|0|2137	8	71.625
ENSG00000186141.8|mRNA|POLR3C|ENSG00000186141.8|ENSG00000186141.8|0|2793	8	69.125
ENSG00000054965.10|mRNA|FAM168A|ENSG00000054965.10|ENSG00000054965.10|0|7887	8	67.125
ENSG00000165899.10|mRNA|OTOGL|ENSG00000165899.10|ENSG00000165899.10|0|8380	8	40
ENSG00000145632.14|mRNA|PLK2|ENSG00000145632.14|ENSG00000145632.14|0|4768	8	47.625
ENSG00000012124.16|mRNA|CD22|ENSG00000012124.16|ENSG00000012124.16|0|6159	8	55
ENSG00000196459.13|mRNA|TRAPPC2|ENSG00000196459.13|ENSG00000196459.13|0|6107	8	64
ENSG00000140941.12|mRNA|MAP1LC3B|ENSG00000140941.12|ENSG00000140941.12|0|5313	8	37.5
ENSG00000198898.13|mRNA|CAPZA2|ENSG00000198898.13|ENSG00000198898.13|0|8425	8	44.25
ENSG00000170043.11|mRNA|TRAPPC1|ENSG00000170043.11|ENSG00000170043.11|0|1171	8	59
ENSG00000136699.19|mRNA|SMPD4|ENSG00000136699.19|ENSG00000136699.19|0|7375	8	46
ENSG00000136490.8|mRNA|LIMD2|ENSG00000136490.8|ENSG00000136490.8|0|4745	8	70.375
ENSG00000108828.15|mRNA|VAT1|ENSG00000108828.15|ENSG00000108828.15|0|3501	8	67
ENSG00000179091.4|mRNA|CYC1|ENSG00000179091.4|ENSG00000179091.4|0|1975	8	58.625
ENSG00000105671.11|mRNA|DDX49|ENSG00000105671.11|ENSG00000105671.11|0|2780	8	39.5
ENSG00000254986.7|mRNA|DPP3|ENSG00000254986.7|ENSG00000254986.7|0|3977	8	58.875
ENSG00000152234.15|mRNA|ATP5A1|ENSG00000152234.15|ENSG00000152234.15|0|10908	8	76.125
ENSG00000175130.6|mRNA|MARCKSL1|ENSG00000175130.6|ENSG00000175130.6|0|1699	8	70
ENSG00000151838.11|mRNA|CCDC175|ENSG00000151838.11|ENSG00000151838.11|0|3245	8	56.125
ENSG00000151491.12|mRNA|EPS8|ENSG00000151491.12|ENSG00000151491.12|0|6200	8	60.75
ENSG00000175029.16|mRNA|CTBP2|ENSG00000175029.16|ENSG00000175029.16|0|10946	8	56.5
ENSG00000165861.13|mRNA|ZFYVE1|ENSG00000165861.13|ENSG00000165861.13|0|5306	7	62.8571
ENSG00000163687.13|mRNA|DNASE1L3|ENSG00000163687.13|ENSG00000163687.13|0|3148	7	63.5714
ENSG00000116649.9|mRNA|SRM|ENSG00000116649.9|ENSG00000116649.9|0|1898	7	56.4286
hsa_circ_0006156|circRNA|hsa_circ_0006156|hsa_circ_0006156|hsa_circ_0006156|0|600	7	30.5714
ENSG00000214113.10|mRNA|LYRM4|ENSG00000214113.10|ENSG00000214113.10|0|9443	7	63.1429
ENSG00000178035.11|mRNA|IMPDH2|ENSG00000178035.11|ENSG00000178035.11|0|2773	7	56.2857
ENSG00000121691.4|mRNA|CAT|ENSG00000121691.4|ENSG00000121691.4|0|3347	7	41
ENSG00000094914.12|mRNA|AAAS|ENSG00000094914.12|ENSG00000094914.12|0|4138	7	52
ENSG00000121680.15|mRNA|PEX16|ENSG00000121680.15|ENSG00000121680.15|0|3013	7	60.1429
ENSG00000124160.11|mRNA|NCOA5|ENSG00000124160.11|ENSG00000124160.11|0|3220	7	50.2857
ENSG00000117676.13|mRNA|RPS6KA1|ENSG00000117676.13|ENSG00000117676.13|0|5884	7	24.8571
ENSG00000169627.7|mRNA|BOLA2B|ENSG00000169627.7|ENSG00000169627.7|0|1365	7	53.1429
ENSG00000250479.8|mRNA|CHCHD10|ENSG00000250479.8|ENSG00000250479.8|0|1360	7	79.1429
hsa_circ_0000084|circRNA|hsa_circ_0000084|hsa_circ_0000084|hsa_circ_0000084|0|600	7	67
ENSG00000004961.14|mRNA|HCCS|ENSG00000004961.14|ENSG00000004961.14|0|2335	7	41.4286
ENSG00000197555.9|mRNA|SIPA1L1|ENSG00000197555.9|ENSG00000197555.9|0|12412	7	53.5714
ENSG00000141510.16|mRNA|TP53|ENSG00000141510.16|ENSG00000141510.16|0|4576	7	57
ENSG00000147677.10|mRNA|EIF3H|ENSG00000147677.10|ENSG00000147677.10|0|6434	7	44.1429
ENSG00000261884.2|mRNA|AC040162.1|ENSG00000261884.2|ENSG00000261884.2|0|5685	7	40.2857
ENSG00000148719.14|mRNA|DNAJB12|ENSG00000148719.14|ENSG00000148719.14|0|5649	7	77.1429
ENSG00000136250.11|mRNA|AOAH|ENSG00000136250.11|ENSG00000136250.11|0|3510	7	72
ENSG00000204287.13|mRNA|HLA-DRA|ENSG00000204287.13|ENSG00000204287.13|0|1280	7	48.8571
ENSG00000134802.17|mRNA|SLC43A3|ENSG00000134802.17|ENSG00000134802.17|0|4517	7	32.8571
ENSG00000184967.6|mRNA|NOC4L|ENSG00000184967.6|ENSG00000184967.6|0|2029	7	33.4286
ENSG00000152061.23|mRNA|RABGAP1L|ENSG00000152061.23|ENSG00000152061.23|0|16071	7	58.1429
ENSG00000152291.13|mRNA|TGOLN2|ENSG00000152291.13|ENSG00000152291.13|0|7081	7	56.2857
ENSG00000184216.13|mRNA|IRAK1|ENSG00000184216.13|ENSG00000184216.13|0|4001	7	40.5714
ENSG00000272398.5|mRNA|CD24|ENSG00000272398.5|ENSG00000272398.5|0|3097	7	47.7143
hsa_circ_0071176|circRNA|hsa_circ_0071176|hsa_circ_0071176|hsa_circ_0071176|0|600	7	51.7143
ENSG00000071082.10|mRNA|RPL31|ENSG00000071082.10|ENSG00000071082.10|0|5791	7	60.1429
ENSG00000154330.12|mRNA|PGM5|ENSG00000154330.12|ENSG00000154330.12|0|7426	7	47.4286
ENSG00000131100.12|mRNA|ATP6V1E1|ENSG00000131100.12|ENSG00000131100.12|0|3212	7	52.2857
ENSG00000204599.14|mRNA|TRIM39|ENSG00000204599.14|ENSG00000204599.14|0|4226	7	43
ENSG00000130300.8|mRNA|PLVAP|ENSG00000130300.8|ENSG00000130300.8|0|2305	7	53.5714
ENSG00000130066.16|mRNA|SAT1|ENSG00000130066.16|ENSG00000130066.16|0|2498	7	46.5714
ENSG00000277791.4|mRNA|PSMB3|ENSG00000277791.4|ENSG00000277791.4|0|1179	7	47.5714
ENSG00000077454.15|mRNA|LRCH4|ENSG00000077454.15|ENSG00000077454.15|0|6838	7	58.8571
ENSG00000284512.1|mRNA|AC092718.8|ENSG00000284512.1|ENSG00000284512.1|0|2892	7	71.4286
ENSG00000124813.20|mRNA|RUNX2|ENSG00000124813.20|ENSG00000124813.20|0|8192	7	64.2857
ENSG00000130775.15|mRNA|THEMIS2|ENSG00000130775.15|ENSG00000130775.15|0|4621	7	54
ENSG00000083290.19|mRNA|ULK2|ENSG00000083290.19|ENSG00000083290.19|0|9843	7	59.7143
ENSG00000105559.11|mRNA|PLEKHA4|ENSG00000105559.11|ENSG00000105559.11|0|3851	7	24.8571
ENSG00000108064.10|mRNA|TFAM|ENSG00000108064.10|ENSG00000108064.10|0|5606	7	63.4286
ENSG00000229647.1|lncRNA|MYOSLID|ENSG00000229647.1|ENSG00000229647.1|0|1204	7	63.1429
ENSG00000108298.9|mRNA|RPL19|ENSG00000108298.9|ENSG00000108298.9|0|2368	7	59.4286
ENSG00000167470.12|mRNA|MIDN|ENSG00000167470.12|ENSG00000167470.12|0|4492	7	70
ENSG00000108854.15|mRNA|SMURF2|ENSG00000108854.15|ENSG00000108854.15|0|6961	7	70.1429
ENSG00000169442.8|mRNA|CD52|ENSG00000169442.8|ENSG00000169442.8|0|935	7	41.1429
ENSG00000112977.15|mRNA|DAP|ENSG00000112977.15|ENSG00000112977.15|0|3361	7	67.2857
ENSG00000171863.12|mRNA|RPS7|ENSG00000171863.12|ENSG00000171863.12|0|5583	7	76.7143
ENSG00000118855.18|mRNA|MFSD1|ENSG00000118855.18|ENSG00000118855.18|0|5288	6	62.5
ENSG00000248334.6|pseudogene|WHAMMP2|ENSG00000248334.6|ENSG00000248334.6|0|6657	6	18.5
ENSG00000188725.7|mRNA|SMIM15|ENSG00000188725.7|ENSG00000188725.7|0|2889	6	54.3333
ENSG00000080200.9|mRNA|CRYBG3|ENSG00000080200.9|ENSG00000080200.9|0|10929	6	54.5
ENSG00000102401.19|mRNA|ARMCX3|ENSG00000102401.19|ENSG00000102401.19|0|4239	6	69.5
ENSG00000162910.18|mRNA|MRPL55|ENSG00000162910.18|ENSG00000162910.18|0|1886	6	38
ENSG00000060491.16|mRNA|OGFR|ENSG00000060491.16|ENSG00000060491.16|0|4702	6	41
ENSG00000182899.14|mRNA|RPL35A|ENSG00000182899.14|ENSG00000182899.14|0|2977	6	60.5
ENSG00000128595.16|mRNA|CALU|ENSG00000128595.16|ENSG00000128595.16|0|4537	6	49.6667
ENSG00000182774.10|mRNA|RPS17|ENSG00000182774.10|ENSG00000182774.10|0|3812	6	31.6667
ENSG00000185787.14|mRNA|MORF4L1|ENSG00000185787.14|ENSG00000185787.14|0|6584	6	56
ENSG00000105993.14|mRNA|DNAJB6|ENSG00000105993.14|ENSG00000105993.14|0|14981	6	65
ENSG00000185650.9|mRNA|ZFP36L1|ENSG00000185650.9|ENSG00000185650.9|0|5160	6	51.6667
ENSG00000130159.13|mRNA|ECSIT|ENSG00000130159.13|ENSG00000130159.13|0|2370	6	60.6667
ENSG00000107736.19|mRNA|CDH23|ENSG00000107736.19|ENSG00000107736.19|0|18059	6	43.8333
ENSG00000141504.11|mRNA|SAT2|ENSG00000141504.11|ENSG00000141504.11|0|1643	6	72.5
ENSG00000113356.11|mRNA|POLR3G|ENSG00000113356.11|ENSG00000113356.11|0|4019	6	50.8333
ENSG00000280227.1|lncRNA|AC079416.3|ENSG00000280227.1|ENSG00000280227.1|0|549	6	58.3333
ENSG00000121316.10|mRNA|PLBD1|ENSG00000121316.10|ENSG00000121316.10|0|2841	6	61.6667
ENSG00000253819.1|lncRNA|LINC01151|ENSG00000253819.1|ENSG00000253819.1|0|571	6	64.1667
ENSG00000108591.9|mRNA|DRG2|ENSG00000108591.9|ENSG00000108591.9|0|7411	6	56.5
ENSG00000170325.14|mRNA|PRDM10|ENSG00000170325.14|ENSG00000170325.14|0|6626	6	31.8333
ENSG00000198918.7|mRNA|RPL39|ENSG00000198918.7|ENSG00000198918.7|0|2141	6	70.6667
hsa_circ_0000110|circRNA|hsa_circ_0000110|hsa_circ_0000110|hsa_circ_0000110|0|600	6	52
ENSG00000108107.14|mRNA|RPL28|ENSG00000108107.14|ENSG00000108107.14|0|6933	6	79.6667
ENSG00000112335.14|mRNA|SNX3|ENSG00000112335.14|ENSG00000112335.14|0|1842	6	64.6667
ENSG00000159388.5|mRNA|BTG2|ENSG00000159388.5|ENSG00000159388.5|0|2757	6	64
ENSG00000125630.15|mRNA|POLR1B|ENSG00000125630.15|ENSG00000125630.15|0|6329	6	38.6667
ENSG00000089159.16|mRNA|PXN|ENSG00000089159.16|ENSG00000089159.16|0|7460	6	61.3333
ENSG00000178951.8|mRNA|ZBTB7A|ENSG00000178951.8|ENSG00000178951.8|0|5725	6	41
hsa_circ_0057023|circRNA|hsa_circ_0057023|hsa_circ_0057023|hsa_circ_0057023|0|600	6	63.3333
ENSG00000138326.18|mRNA|RPS24|ENSG00000138326.18|ENSG00000138326.18|0|4880	6	46.3333
ENSG00000162368.13|mRNA|CMPK1|ENSG00000162368.13|ENSG00000162368.13|0|3844	6	41.5
ENSG00000108691.9|mRNA|CCL2|ENSG00000108691.9|ENSG00000108691.9|0|1986	6	56
ENSG00000148484.17|mRNA|RSU1|ENSG00000148484.17|ENSG00000148484.17|0|4191	6	67.8333
ENSG00000162551.13|mRNA|ALPL|ENSG00000162551.13|ENSG00000162551.13|0|3007	6	54.8333
ENSG00000215039.6|lncRNA|CD27-AS1|ENSG00000215039.6|ENSG00000215039.6|0|3411	6	66.6667
ENSG00000135900.3|mRNA|MRPL44|ENSG00000135900.3|ENSG00000135900.3|0|1748	6	54
hsa_circ_0073434|circRNA|hsa_circ_0073434|hsa_circ_0073434|hsa_circ_0073434|0|600	6	40.5
ENSG00000141562.17|mRNA|NARF|ENSG00000141562.17|ENSG00000141562.17|0|7962	6	57.8333
ENSG00000137054.15|mRNA|POLR1E|ENSG00000137054.15|ENSG00000137054.15|0|2512	6	53.3333
ENSG00000141698.16|mRNA|NT5C3B|ENSG00000141698.16|ENSG00000141698.16|0|2730	6	61.1667
ENSG00000183726.10|mRNA|TMEM50A|ENSG00000183726.10|ENSG00000183726.10|0|3410	6	56.1667
ENSG00000104921.14|mRNA|FCER2|ENSG00000104921.14|ENSG00000104921.14|0|2451	6	48.8333
ENSG00000169189.16|mRNA|NSMCE1|ENSG00000169189.16|ENSG00000169189.16|0|3770	6	59
ENSG00000184007.18|mRNA|PTP4A2|ENSG00000184007.18|ENSG00000184007.18|0|6267	6	63
ENSG00000258422.5|lncRNA|AL160191.1|ENSG00000258422.5|ENSG00000258422.5|0|1109	6	30.8333
ENSG00000240409.1|pseudogene|MTATP8P1|ENSG00000240409.1|ENSG00000240409.1|0|207	6	16.3333
ENSG00000114026.21|mRNA|OGG1|ENSG00000114026.21|ENSG00000114026.21|0|8733	6	44.8333
ENSG00000214188.9|lncRNA|ST7-OT4|ENSG00000214188.9|ENSG00000214188.9|0|2664	6	41.5
ENSG00000204356.13|mRNA|NELFE|ENSG00000204356.13|ENSG00000204356.13|0|2719	6	54.5
ENSG00000115523.16|mRNA|GNLY|ENSG00000115523.16|ENSG00000115523.16|0|3051	6	47.8333
ENSG00000168300.13|mRNA|PCMTD1|ENSG00000168300.13|ENSG00000168300.13|0|7323	6	75.5
ENSG00000143379.12|mRNA|SETDB1|ENSG00000143379.12|ENSG00000143379.12|0|7093	6	54.5
ENSG00000254975.1|lncRNA|AP001189.4|ENSG00000254975.1|ENSG00000254975.1|0|452	6	46.8333
ENSG00000184178.15|mRNA|SCFD2|ENSG00000184178.15|ENSG00000184178.15|0|3185	6	68.3333
ENSG00000105383.14|mRNA|CD33|ENSG00000105383.14|ENSG00000105383.14|0|5975	6	66.6667
ENSG00000115289.13|mRNA|PCGF1|ENSG00000115289.13|ENSG00000115289.13|0|2629	6	48.3333
ENSG00000166086.12|mRNA|JAM3|ENSG00000166086.12|ENSG00000166086.12|0|5451	6	59.3333
ENSG00000132017.10|mRNA|DCAF15|ENSG00000132017.10|ENSG00000132017.10|0|2961	6	64.8333
ENSG00000110077.14|mRNA|MS4A6A|ENSG00000110077.14|ENSG00000110077.14|0|5791	6	47.8333
ENSG00000109814.11|mRNA|UGDH|ENSG00000109814.11|ENSG00000109814.11|0|4045	6	70.6667
ENSG00000131043.11|mRNA|AAR2|ENSG00000131043.11|ENSG00000131043.11|0|3101	6	44.6667
ENSG00000113732.8|mRNA|ATP6V0E1|ENSG00000113732.8|ENSG00000113732.8|0|1623	6	55
ENSG00000196776.14|mRNA|CD47|ENSG00000196776.14|ENSG00000196776.14|0|7895	6	54.8333
ENSG00000066379.14|mRNA|ZNRD1|ENSG00000066379.14|ENSG00000066379.14|0|3672	6	75.5
ENSG00000260342.2|mRNA|AC138811.2|ENSG00000260342.2|ENSG00000260342.2|0|764	6	66.3333
ENSG00000273398.6|mRNA|AC017083.4|ENSG00000273398.6|ENSG00000273398.6|0|2306	6	48.3333
ENSG00000073861.2|mRNA|TBX21|ENSG00000073861.2|ENSG00000073861.2|0|2614	6	71.3333
ENSG00000183049.12|mRNA|CAMK1D|ENSG00000183049.12|ENSG00000183049.12|0|8762	6	57.5
ENSG00000117091.9|mRNA|CD48|ENSG00000117091.9|ENSG00000117091.9|0|3274	6	57.8333
hsa_circ_0007694|circRNA|hsa_circ_0007694|hsa_circ_0007694|hsa_circ_0007694|0|344	6	50
ENSG00000204628.11|mRNA|RACK1|ENSG00000204628.11|ENSG00000204628.11|0|5990	6	61.6667
ENSG00000151327.12|mRNA|FAM177A1|ENSG00000151327.12|ENSG00000151327.12|0|8385	6	58.6667
ENSG00000275210.1|lncRNA|AC245884.11|ENSG00000275210.1|ENSG00000275210.1|0|1734	6	74
ENSG00000142534.6|mRNA|RPS11|ENSG00000142534.6|ENSG00000142534.6|0|1390	6	77.8333
ENSG00000232388.4|mRNA|SMIM26|ENSG00000232388.4|ENSG00000232388.4|0|1098	5	57.8
ENSG00000103811.15|mRNA|CTSH|ENSG00000103811.15|ENSG00000103811.15|0|5892	5	54
hsa_circ_0080854|circRNA|hsa_circ_0080854|hsa_circ_0080854|hsa_circ_0080854|0|600	5	69.6
ENSG00000105281.12|mRNA|SLC1A5|ENSG00000105281.12|ENSG00000105281.12|0|3332	5	63.6
ENSG00000075420.12|mRNA|FNDC3B|ENSG00000075420.12|ENSG00000075420.12|0|13270	5	55.8
ENSG00000203747.10|mRNA|FCGR3A|ENSG00000203747.10|ENSG00000203747.10|0|2958	5	60
ENSG00000269955.2|mRNA|C7orf55-LUC7L2|ENSG00000269955.2|ENSG00000269955.2|0|1661	5	82.2
ENSG00000149196.15|mRNA|HIKESHI|ENSG00000149196.15|ENSG00000149196.15|0|3421	5	65
ENSG00000170667.14|mRNA|RASA4B|ENSG00000170667.14|ENSG00000170667.14|0|4840	5	40.8
ENSG00000221823.10|mRNA|PPP3R1|ENSG00000221823.10|ENSG00000221823.10|0|3363	5	34.8
ENSG00000198964.13|mRNA|SGMS1|ENSG00000198964.13|ENSG00000198964.13|0|6429	5	46
ENSG00000183401.11|mRNA|CCDC159|ENSG00000183401.11|ENSG00000183401.11|0|4064	5	60.4
ENSG00000150093.18|mRNA|ITGB1|ENSG00000150093.18|ENSG00000150093.18|0|6011	5	77
ENSG00000134539.16|mRNA|KLRD1|ENSG00000134539.16|ENSG00000134539.16|0|17404	5	61.8
ENSG00000185989.10|mRNA|RASA3|ENSG00000185989.10|ENSG00000185989.10|0|4763	5	32.2
ENSG00000273149.1|lncRNA|AL138963.3|ENSG00000273149.1|ENSG00000273149.1|0|588	5	72.8
ENSG00000204577.11|mRNA|LILRB3|ENSG00000204577.11|ENSG00000204577.11|0|3736	5	62.2
ENSG00000167645.16|mRNA|YIF1B|ENSG00000167645.16|ENSG00000167645.16|0|3193	5	59.4
ENSG00000172062.16|mRNA|SMN1|ENSG00000172062.16|ENSG00000172062.16|0|3097	5	70.4
ENSG00000181982.18|mRNA|CCDC149|ENSG00000181982.18|ENSG00000181982.18|0|9582	5	72.2
ENSG00000182022.17|mRNA|CHST15|ENSG00000182022.17|ENSG00000182022.17|0|6554	5	44
ENSG00000105656.12|mRNA|ELL|ENSG00000105656.12|ENSG00000105656.12|0|4929	5	62.8
ENSG00000182541.17|mRNA|LIMK2|ENSG00000182541.17|ENSG00000182541.17|0|6170	5	57
ENSG00000171298.12|mRNA|GAA|ENSG00000171298.12|ENSG00000171298.12|0|5156	5	9.4
ENSG00000280913.2|pseudogene|CTSLP2|ENSG00000280913.2|ENSG00000280913.2|0|1476	5	57.8
ENSG00000184990.12|mRNA|SIVA1|ENSG00000184990.12|ENSG00000184990.12|0|4776	5	52.2
ENSG00000135605.12|mRNA|TEC|ENSG00000135605.12|ENSG00000135605.12|0|4030	5	51
ENSG00000101335.9|mRNA|MYL9|ENSG00000101335.9|ENSG00000101335.9|0|2821	5	29.4
ENSG00000144218.18|mRNA|AFF3|ENSG00000144218.18|ENSG00000144218.18|0|12737	5	33.4
ENSG00000137460.8|mRNA|FHDC1|ENSG00000137460.8|ENSG00000137460.8|0|6593	5	32.4
ENSG00000213625.8|mRNA|LEPROT|ENSG00000213625.8|ENSG00000213625.8|0|5237	5	51.8
ENSG00000100353.17|mRNA|EIF3D|ENSG00000100353.17|ENSG00000100353.17|0|4070	5	42.4
ENSG00000166681.13|mRNA|BEX3|ENSG00000166681.13|ENSG00000166681.13|0|1080	5	53.6
ENSG00000236304.1|lncRNA|AP001189.1|ENSG00000236304.1|ENSG00000236304.1|0|1426	5	53
ENSG00000248516.1|lncRNA|AC105415.1|ENSG00000248516.1|ENSG00000248516.1|0|1416	5	61.8
ENSG00000140374.15|mRNA|ETFA|ENSG00000140374.15|ENSG00000140374.15|0|5031	5	18.4
ENSG00000248235.6|mRNA|AC037459.1|ENSG00000248235.6|ENSG00000248235.6|0|1198	5	53.2
ENSG00000100347.14|mRNA|SAMM50|ENSG00000100347.14|ENSG00000100347.14|0|6435	5	63.8
ENSG00000145592.13|mRNA|RPL37|ENSG00000145592.13|ENSG00000145592.13|0|8153	5	77.2
ENSG00000018280.16|mRNA|SLC11A1|ENSG00000018280.16|ENSG00000018280.16|0|8676	5	57.2
ENSG00000142867.12|mRNA|BCL10|ENSG00000142867.12|ENSG00000142867.12|0|2819	5	38
ENSG00000169756.16|mRNA|LIMS1|ENSG00000169756.16|ENSG00000169756.16|0|7771	5	50.4
ENSG00000148218.15|mRNA|ALAD|ENSG00000148218.15|ENSG00000148218.15|0|4983	5	59.8
ENSG00000167202.11|mRNA|TBC1D2B|ENSG00000167202.11|ENSG00000167202.11|0|9763	5	85.2
ENSG00000145703.15|mRNA|IQGAP2|ENSG00000145703.15|ENSG00000145703.15|0|7904	5	43.6
ENSG00000163554.12|mRNA|SPTA1|ENSG00000163554.12|ENSG00000163554.12|0|10025	5	72.4
ENSG00000106028.10|mRNA|SSBP1|ENSG00000106028.10|ENSG00000106028.10|0|4988	5	56.2
ENSG00000196531.10|mRNA|NACA|ENSG00000196531.10|ENSG00000196531.10|0|10008	5	71.8
ENSG00000113558.18|mRNA|SKP1|ENSG00000113558.18|ENSG00000113558.18|0|12771	5	47.6
ENSG00000100097.11|mRNA|LGALS1|ENSG00000100097.11|ENSG00000100097.11|0|1099	5	68.2
ENSG00000146278.10|mRNA|PNRC1|ENSG00000146278.10|ENSG00000146278.10|0|2992	5	40.2
ENSG00000196757.7|mRNA|ZNF700|ENSG00000196757.7|ENSG00000196757.7|0|3319	5	49.2
ENSG00000196839.12|mRNA|ADA|ENSG00000196839.12|ENSG00000196839.12|0|2852	5	32.2
ENSG00000117335.19|mRNA|CD46|ENSG00000117335.19|ENSG00000117335.19|0|8708	5	34.8
ENSG00000116138.12|mRNA|DNAJC16|ENSG00000116138.12|ENSG00000116138.12|0|8563	5	38.6
ENSG00000164062.12|mRNA|APEH|ENSG00000164062.12|ENSG00000164062.12|0|4669	5	40.4
ENSG00000121749.15|mRNA|TBC1D15|ENSG00000121749.15|ENSG00000121749.15|0|8227	5	44.2
ENSG00000225972.1|pseudogene|MTND1P23|ENSG00000225972.1|ENSG00000225972.1|0|372	5	45.6
ENSG00000101444.12|mRNA|AHCY|ENSG00000101444.12|ENSG00000101444.12|0|3894	5	72.2
ENSG00000138185.19|mRNA|ENTPD1|ENSG00000138185.19|ENSG00000138185.19|0|6975	5	75.4
ENSG00000197969.11|mRNA|VPS13A|ENSG00000197969.11|ENSG00000197969.11|0|20196	5	44.4
ENSG00000122643.18|mRNA|NT5C3A|ENSG00000122643.18|ENSG00000122643.18|0|3493	5	56.4
ENSG00000161956.12|mRNA|SENP3|ENSG00000161956.12|ENSG00000161956.12|0|3668	5	29.6
ENSG00000120963.11|mRNA|ZNF706|ENSG00000120963.11|ENSG00000120963.11|0|7393	5	65.8
hsa_circ_0085307|circRNA|hsa_circ_0085307|hsa_circ_0085307|hsa_circ_0085307|0|600	5	51
ENSG00000148541.12|mRNA|FAM13C|ENSG00000148541.12|ENSG00000148541.12|0|6753	5	39.8
ENSG00000138443.15|mRNA|ABI2|ENSG00000138443.15|ENSG00000138443.15|0|23331	5	37
ENSG00000100918.12|mRNA|REC8|ENSG00000100918.12|ENSG00000100918.12|0|3844	5	56.8
ENSG00000101138.11|mRNA|CSTF1|ENSG00000101138.11|ENSG00000101138.11|0|4800	5	55
ENSG00000106400.11|mRNA|ZNHIT1|ENSG00000106400.11|ENSG00000106400.11|0|5510	5	61.8
ENSG00000102030.15|mRNA|NAA10|ENSG00000102030.15|ENSG00000102030.15|0|4742	5	56.4
ENSG00000091483.6|mRNA|FH|ENSG00000091483.6|ENSG00000091483.6|0|2142	5	91.4
ENSG00000259399.1|mRNA|TGIF2-C20orf24|ENSG00000259399.1|ENSG00000259399.1|0|918	5	63.6
ENSG00000144824.20|mRNA|PHLDB2|ENSG00000144824.20|ENSG00000144824.20|0|12309	5	74.8
ENSG00000010278.12|mRNA|CD9|ENSG00000010278.12|ENSG00000010278.12|0|3299	4	89.75
ENSG00000004142.11|mRNA|POLDIP2|ENSG00000004142.11|ENSG00000004142.11|0|2121	4	55
ENSG00000227071.1|lncRNA|FOCAD-AS1|ENSG00000227071.1|ENSG00000227071.1|0|423	4	45
ENSG00000143842.14|mRNA|SOX13|ENSG00000143842.14|ENSG00000143842.14|0|7420	4	78
ENSG00000143013.12|mRNA|LMO4|ENSG00000143013.12|ENSG00000143013.12|0|5833	4	51
ENSG00000133256.12|mRNA|PDE6B|ENSG00000133256.12|ENSG00000133256.12|0|5086	4	43.5
ENSG00000109475.16|mRNA|RPL34|ENSG00000109475.16|ENSG00000109475.16|0|3393	4	74.25
ENSG00000134597.15|mRNA|RBMX2|ENSG00000134597.15|ENSG00000134597.15|0|2491	4	58.25
ENSG00000197756.9|mRNA|RPL37A|ENSG00000197756.9|ENSG00000197756.9|0|6841	4	74.5
ENSG00000198380.12|mRNA|GFPT1|ENSG00000198380.12|ENSG00000198380.12|0|8866	4	77.75
ENSG00000145287.10|mRNA|PLAC8|ENSG00000145287.10|ENSG00000145287.10|0|3853	4	50
ENSG00000255364.1|lncRNA|SMILR|ENSG00000255364.1|ENSG00000255364.1|0|553	4	36.25
ENSG00000145819.15|mRNA|ARHGAP26|ENSG00000145819.15|ENSG00000145819.15|0|13347	4	25.75
ENSG00000146376.10|mRNA|ARHGAP18|ENSG00000146376.10|ENSG00000146376.10|0|4640	4	58
hsa_circ_0082580|circRNA|hsa_circ_0082580|hsa_circ_0082580|hsa_circ_0082580|0|600	4	24.75
ENSG00000137824.15|mRNA|RMDN3|ENSG00000137824.15|ENSG00000137824.15|0|5114	4	55.5
ENSG00000187778.13|mRNA|MCRS1|ENSG00000187778.13|ENSG00000187778.13|0|3269	4	68.5
ENSG00000270800.2|mRNA|RPS10-NUDT3|ENSG00000270800.2|ENSG00000270800.2|0|5018	4	51.25
ENSG00000170638.9|mRNA|TRABD|ENSG00000170638.9|ENSG00000170638.9|0|3153	4	73.5
ENSG00000198856.12|mRNA|OSTC|ENSG00000198856.12|ENSG00000198856.12|0|1617	4	73.5
ENSG00000136636.12|mRNA|KCTD3|ENSG00000136636.12|ENSG00000136636.12|0|4929	4	67.75
hsa_circ_0080827|circRNA|hsa_circ_0080827|hsa_circ_0080827|hsa_circ_0080827|0|600	4	35.25
ENSG00000226310.1|lncRNA|AL022157.1|ENSG00000226310.1|ENSG00000226310.1|0|665	4	58.25
ENSG00000052723.11|mRNA|SIKE1|ENSG00000052723.11|ENSG00000052723.11|0|5894	4	62.75
ENSG00000185885.15|mRNA|IFITM1|ENSG00000185885.15|ENSG00000185885.15|0|1080	4	65.25
ENSG00000138594.13|mRNA|TMOD3|ENSG00000138594.13|ENSG00000138594.13|0|10632	4	54.5
hsa_circ_0085314|circRNA|hsa_circ_0085314|hsa_circ_0085314|hsa_circ_0085314|0|600	4	54.25
ENSG00000185842.15|mRNA|DNAH14|ENSG00000185842.15|ENSG00000185842.15|0|19693	4	75.75
ENSG00000148362.10|mRNA|PAXX|ENSG00000148362.10|ENSG00000148362.10|0|1367	4	35.75
ENSG00000138798.11|mRNA|EGF|ENSG00000138798.11|ENSG00000138798.11|0|6127	4	62.5
ENSG00000139180.10|mRNA|NDUFA9|ENSG00000139180.10|ENSG00000139180.10|0|10391	4	70
ENSG00000108106.13|mRNA|UBE2S|ENSG00000108106.13|ENSG00000108106.13|0|2788	4	73.5
ENSG00000139620.12|mRNA|KANSL2|ENSG00000139620.12|ENSG00000139620.12|0|3386	4	51.75
ENSG00000147408.14|mRNA|CSGALNACT1|ENSG00000147408.14|ENSG00000147408.14|0|6580	4	65.25
ENSG00000204219.9|mRNA|TCEA3|ENSG00000204219.9|ENSG00000204219.9|0|3515	4	59.75
ENSG00000260836.1|mRNA|AC245033.1|ENSG00000260836.1|ENSG00000260836.1|0|880	4	62.75
ENSG00000196154.11|mRNA|S100A4|ENSG00000196154.11|ENSG00000196154.11|0|1025	4	26.75
ENSG00000061936.9|mRNA|SFSWAP|ENSG00000061936.9|ENSG00000061936.9|0|10157	4	76.75
ENSG00000064989.12|mRNA|CALCRL|ENSG00000064989.12|ENSG00000064989.12|0|6144	4	51.75
ENSG00000134905.16|mRNA|CARS2|ENSG00000134905.16|ENSG00000134905.16|0|10460	4	51
ENSG00000065989.15|mRNA|PDE4A|ENSG00000065989.15|ENSG00000065989.15|0|6646	4	49.75
hsa_circ_0015068|circRNA|hsa_circ_0015068|hsa_circ_0015068|hsa_circ_0015068|0|600	4	62.25
ENSG00000155099.7|mRNA|TMEM55A|ENSG00000155099.7|ENSG00000155099.7|0|3066	4	29.25
ENSG00000144468.16|mRNA|RHBDD1|ENSG00000144468.16|ENSG00000144468.16|0|6926	4	37
hsa_circ_0007734|circRNA|hsa_circ_0007734|hsa_circ_0007734|hsa_circ_0007734|0|600	4	35.5
ENSG00000086232.12|mRNA|EIF2AK1|ENSG00000086232.12|ENSG00000086232.12|0|5550	4	64
ENSG00000163798.13|mRNA|SLC4A1AP|ENSG00000163798.13|ENSG00000163798.13|0|5207	4	54.5
ENSG00000113638.13|mRNA|TTC33|ENSG00000113638.13|ENSG00000113638.13|0|6821	4	74.5
ENSG00000103490.13|mRNA|PYCARD|ENSG00000103490.13|ENSG00000103490.13|0|1661	4	76.5
hsa_circ_0042754|circRNA|hsa_circ_0042754|hsa_circ_0042754|hsa_circ_0042754|0|600	4	33.5
ENSG00000100227.17|mRNA|POLDIP3|ENSG00000100227.17|ENSG00000100227.17|0|3650	4	29.75
ENSG00000158985.13|mRNA|CDC42SE2|ENSG00000158985.13|ENSG00000158985.13|0|6024	4	56.25
ENSG00000100243.20|mRNA|CYB5R3|ENSG00000100243.20|ENSG00000100243.20|0|5973	4	58
ENSG00000085415.15|mRNA|SEH1L|ENSG00000085415.15|ENSG00000085415.15|0|10481	4	65.25
ENSG00000125691.12|mRNA|RPL23|ENSG00000125691.12|ENSG00000125691.12|0|5979	4	66.5
ENSG00000164116.16|mRNA|GUCY1A3|ENSG00000164116.16|ENSG00000164116.16|0|5766	4	57.25
ENSG00000162813.17|mRNA|BPNT1|ENSG00000162813.17|ENSG00000162813.17|0|3113	4	56
ENSG00000100297.15|mRNA|MCM5|ENSG00000100297.15|ENSG00000100297.15|0|7338	4	69.75
ENSG00000126246.9|mRNA|IGFLR1|ENSG00000126246.9|ENSG00000126246.9|0|2203	4	59
ENSG00000126756.11|mRNA|UXT|ENSG00000126756.11|ENSG00000126756.11|0|1243	4	77.5
ENSG00000160255.17|mRNA|ITGB2|ENSG00000160255.17|ENSG00000160255.17|0|6797	4	52.75
hsa_circ_0000398|circRNA|hsa_circ_0000398|hsa_circ_0000398|hsa_circ_0000398|0|600	4	48
ENSG00000081154.11|mRNA|PCNP|ENSG00000081154.11|ENSG00000081154.11|0|3102	4	57.25
hsa_circ_0002474|circRNA|hsa_circ_0002474|hsa_circ_0002474|hsa_circ_0002474|0|600	4	45.25
ENSG00000177600.8|mRNA|RPLP2|ENSG00000177600.8|ENSG00000177600.8|0|1955	4	77.5
hsa_circ_0001789|circRNA|hsa_circ_0001789|hsa_circ_0001789|hsa_circ_0001789|0|600	4	63.75
ENSG00000120727.12|mRNA|PAIP2|ENSG00000120727.12|ENSG00000120727.12|0|3158	4	68.5
ENSG00000177954.11|mRNA|RPS27|ENSG00000177954.11|ENSG00000177954.11|0|946	4	57.5
ENSG00000162946.21|mRNA|DISC1|ENSG00000162946.21|ENSG00000162946.21|0|12906	4	55.25
ENSG00000248527.1|pseudogene|MTATP6P1|ENSG00000248527.1|ENSG00000248527.1|0|681	4	63.5
ENSG00000166685.11|mRNA|COG1|ENSG00000166685.11|ENSG00000166685.11|0|5317	4	36
ENSG00000121671.11|mRNA|CRY2|ENSG00000121671.11|ENSG00000121671.11|0|6200	4	85.25
ENSG00000235505.7|pseudogene|AP002004.1|ENSG00000235505.7|ENSG00000235505.7|0|4307	4	51.5
ENSG00000172890.11|mRNA|NADSYN1|ENSG00000172890.11|ENSG00000172890.11|0|16263	4	68.25
ENSG00000163479.13|mRNA|SSR2|ENSG00000163479.13|ENSG00000163479.13|0|6651	4	67.5
ENSG00000119403.13|mRNA|PHF19|ENSG00000119403.13|ENSG00000119403.13|0|6733	4	61.75
ENSG00000122224.17|mRNA|LY9|ENSG00000122224.17|ENSG00000122224.17|0|9118	4	72
ENSG00000087460.24|mRNA|GNAS|ENSG00000087460.24|ENSG00000087460.24|0|13320	4	73
ENSG00000119242.8|mRNA|CCDC92|ENSG00000119242.8|ENSG00000119242.8|0|8223	4	56.25
ENSG00000126759.13|mRNA|CFP|ENSG00000126759.13|ENSG00000126759.13|0|5617	4	61.5
ENSG00000093072.15|mRNA|ADA2|ENSG00000093072.15|ENSG00000093072.15|0|5800	4	62
ENSG00000165682.14|mRNA|CLEC1B|ENSG00000165682.14|ENSG00000165682.14|0|3670	4	70.75
ENSG00000272917.1|lncRNA|AC010186.4|ENSG00000272917.1|ENSG00000272917.1|0|615	4	42
hsa_circ_0070804|circRNA|hsa_circ_0070804|hsa_circ_0070804|hsa_circ_0070804|0|600	4	46.5
ENSG00000131373.14|mRNA|HACL1|ENSG00000131373.14|ENSG00000131373.14|0|3055	4	57.5
ENSG00000165802.22|mRNA|NSMF|ENSG00000165802.22|ENSG00000165802.22|0|4912	4	75.5
ENSG00000128340.14|mRNA|RAC2|ENSG00000128340.14|ENSG00000128340.14|0|2532	4	39
ENSG00000154518.9|mRNA|ATP5G3|ENSG00000154518.9|ENSG00000154518.9|0|6780	4	38
ENSG00000173272.15|mRNA|MZT2A|ENSG00000173272.15|ENSG00000173272.15|0|4093	4	39.75
ENSG00000152952.11|mRNA|PLOD2|ENSG00000152952.11|ENSG00000152952.11|0|7646	4	51.75
ENSG00000114738.10|mRNA|MAPKAPK3|ENSG00000114738.10|ENSG00000114738.10|0|3921	4	72.5
ENSG00000115875.18|mRNA|SRSF7|ENSG00000115875.18|ENSG00000115875.18|0|4045	4	53.25
ENSG00000131095.12|mRNA|GFAP|ENSG00000131095.12|ENSG00000131095.12|0|12110	4	69.25
ENSG00000075945.12|mRNA|KIFAP3|ENSG00000075945.12|ENSG00000075945.12|0|4978	4	54.25
ENSG00000115073.7|mRNA|ACTR1B|ENSG00000115073.7|ENSG00000115073.7|0|2892	4	65.25
ENSG00000152492.13|mRNA|CCDC50|ENSG00000152492.13|ENSG00000152492.13|0|9202	4	43.25
ENSG00000171132.13|mRNA|PRKCE|ENSG00000171132.13|ENSG00000171132.13|0|9908	4	21
ENSG00000132356.11|mRNA|PRKAA1|ENSG00000132356.11|ENSG00000132356.11|0|6563	4	40.75
ENSG00000174547.13|mRNA|MRPL11|ENSG00000174547.13|ENSG00000174547.13|0|2539	4	56.5
ENSG00000165233.17|mRNA|CARD19|ENSG00000165233.17|ENSG00000165233.17|0|3081	4	70
ENSG00000205236.6|mRNA|AC105052.1|ENSG00000205236.6|ENSG00000205236.6|0|3569	4	64.75
ENSG00000076248.10|mRNA|UNG|ENSG00000076248.10|ENSG00000076248.10|0|2567	4	24.75
ENSG00000077150.18|mRNA|NFKB2|ENSG00000077150.18|ENSG00000077150.18|0|4484	4	78.5
ENSG00000144645.13|mRNA|OSBPL10|ENSG00000144645.13|ENSG00000144645.13|0|11976	3	59.3333
ENSG00000189067.12|mRNA|LITAF|ENSG00000189067.12|ENSG00000189067.12|0|5060	3	67.3333
ENSG00000173744.17|mRNA|AGFG1|ENSG00000173744.17|ENSG00000173744.17|0|9321	3	76
ENSG00000189319.13|mRNA|FAM53B|ENSG00000189319.13|ENSG00000189319.13|0|6424	3	55.3333
ENSG00000173511.9|mRNA|VEGFB|ENSG00000173511.9|ENSG00000173511.9|0|1545	3	49
ENSG00000166441.12|mRNA|RPL27A|ENSG00000166441.12|ENSG00000166441.12|0|7193	3	80
ENSG00000237854.3|pseudogene|LINC00674|ENSG00000237854.3|ENSG00000237854.3|0|734	3	66.3333
ENSG00000166224.16|mRNA|SGPL1|ENSG00000166224.16|ENSG00000166224.16|0|7486	3	55.3333
ENSG00000176783.14|mRNA|RUFY1|ENSG00000176783.14|ENSG00000176783.14|0|5911	3	59.3333
ENSG00000197903.7|mRNA|HIST1H2BK|ENSG00000197903.7|ENSG00000197903.7|0|381	3	59.6667
ENSG00000145649.7|mRNA|GZMA|ENSG00000145649.7|ENSG00000145649.7|0|894	3	50.6667
ENSG00000248167.7|mRNA|TRIM39-RPP21|ENSG00000248167.7|ENSG00000248167.7|0|1698	3	46.6667
ENSG00000175061.17|lncRNA|LRRC75A-AS1|ENSG00000175061.17|ENSG00000175061.17|0|3759	3	50.3333
ENSG00000174738.12|mRNA|NR1D2|ENSG00000174738.12|ENSG00000174738.12|0|5820	3	46.6667
ENSG00000164691.16|mRNA|TAGAP|ENSG00000164691.16|ENSG00000164691.16|0|4089	3	60.6667
ENSG00000145708.10|mRNA|CRHBP|ENSG00000145708.10|ENSG00000145708.10|0|2803	3	43.3333
ENSG00000241370.5|mRNA|RPP21|ENSG00000241370.5|ENSG00000241370.5|0|1606	3	67.3333
ENSG00000165476.13|mRNA|REEP3|ENSG00000165476.13|ENSG00000165476.13|0|5248	3	41
ENSG00000169738.7|mRNA|DCXR|ENSG00000169738.7|ENSG00000169738.7|0|1902	3	67.6667
ENSG00000197548.12|mRNA|ATG7|ENSG00000197548.12|ENSG00000197548.12|0|8833	3	61.6667
ENSG00000236333.3|lncRNA|TRHDE-AS1|ENSG00000236333.3|ENSG00000236333.3|0|8781	3	39.3333
ENSG00000175471.19|mRNA|MCTP1|ENSG00000175471.19|ENSG00000175471.19|0|12089	3	38.6667
ENSG00000196611.4|mRNA|MMP1|ENSG00000196611.4|ENSG00000196611.4|0|1970	3	35
ENSG00000163755.8|mRNA|HPS3|ENSG00000163755.8|ENSG00000163755.8|0|6256	3	48
ENSG00000198795.10|mRNA|ZNF521|ENSG00000198795.10|ENSG00000198795.10|0|6223	3	56.3333
ENSG00000163754.17|mRNA|GYG1|ENSG00000163754.17|ENSG00000163754.17|0|3511	3	37.3333
ENSG00000175324.9|mRNA|LSM1|ENSG00000175324.9|ENSG00000175324.9|0|1690	3	26.6667
ENSG00000175470.18|mRNA|PPP2R2D|ENSG00000175470.18|ENSG00000175470.18|0|7756	3	61.3333
ENSG00000146963.17|mRNA|LUC7L2|ENSG00000146963.17|ENSG00000146963.17|0|6316	3	75
ENSG00000164442.9|mRNA|CITED2|ENSG00000164442.9|ENSG00000164442.9|0|2535	3	59.6667
ENSG00000152484.13|mRNA|USP12|ENSG00000152484.13|ENSG00000152484.13|0|5195	3	40.6667
ENSG00000177200.16|mRNA|CHD9|ENSG00000177200.16|ENSG00000177200.16|0|16502	3	36.3333
ENSG00000256594.8|pseudogene|AC010186.2|ENSG00000256594.8|ENSG00000256594.8|0|2825	3	40.3333
ENSG00000251513.2|lncRNA|LIX1-AS1|ENSG00000251513.2|ENSG00000251513.2|0|1793	3	60.6667
ENSG00000181929.11|mRNA|PRKAG1|ENSG00000181929.11|ENSG00000181929.11|0|4556	3	36.6667
ENSG00000182220.14|mRNA|ATP6AP2|ENSG00000182220.14|ENSG00000182220.14|0|9560	3	42
ENSG00000156482.10|mRNA|RPL30|ENSG00000156482.10|ENSG00000156482.10|0|4027	3	62.6667
ENSG00000150637.8|mRNA|CD226|ENSG00000150637.8|ENSG00000150637.8|0|13638	3	45.3333
ENSG00000182957.15|mRNA|SPATA13|ENSG00000182957.15|ENSG00000182957.15|0|9948	3	89.6667
ENSG00000167862.9|mRNA|MRPL58|ENSG00000167862.9|ENSG00000167862.9|0|1108	3	76
ENSG00000156265.15|mRNA|MAP3K7CL|ENSG00000156265.15|ENSG00000156265.15|0|4497	3	44.3333
ENSG00000171858.17|mRNA|RPS21|ENSG00000171858.17|ENSG00000171858.17|0|1023	3	77.6667
ENSG00000171700.13|mRNA|RGS19|ENSG00000171700.13|ENSG00000171700.13|0|2028	3	59
ENSG00000170681.6|mRNA|CAVIN4|ENSG00000170681.6|ENSG00000170681.6|0|2615	3	29.6667
ENSG00000171314.8|mRNA|PGAM1|ENSG00000171314.8|ENSG00000171314.8|0|2568	3	60
ENSG00000154803.12|mRNA|FLCN|ENSG00000154803.12|ENSG00000154803.12|0|9786	3	34.3333
ENSG00000255007.1|lncRNA|LINC02489|ENSG00000255007.1|ENSG00000255007.1|0|354	3	74.6667
ENSG00000183978.7|mRNA|COA3|ENSG00000183978.7|ENSG00000183978.7|0|1922	3	63.3333
ENSG00000169062.14|mRNA|UPF3A|ENSG00000169062.14|ENSG00000169062.14|0|5772	3	85.3333
ENSG00000171204.12|mRNA|TMEM126B|ENSG00000171204.12|ENSG00000171204.12|0|2416	3	56.3333
ENSG00000154133.14|mRNA|ROBO4|ENSG00000154133.14|ENSG00000154133.14|0|7033	3	63
ENSG00000223482.7|lncRNA|NUTM2A-AS1|ENSG00000223482.7|ENSG00000223482.7|0|6851	3	86.3333
ENSG00000184428.12|mRNA|TOP1MT|ENSG00000184428.12|ENSG00000184428.12|0|6441	3	34.6667
ENSG00000152518.7|mRNA|ZFP36L2|ENSG00000152518.7|ENSG00000152518.7|0|3696	3	74
ENSG00000152348.15|mRNA|ATG10|ENSG00000152348.15|ENSG00000152348.15|0|5449	3	72.3333
ENSG00000168906.12|mRNA|MAT2A|ENSG00000168906.12|ENSG00000168906.12|0|4487	3	65
ENSG00000158006.13|mRNA|PAFAH2|ENSG00000158006.13|ENSG00000158006.13|0|3835	3	46.6667
ENSG00000158864.12|mRNA|NDUFS2|ENSG00000158864.12|ENSG00000158864.12|0|3658	3	81.6667
ENSG00000181481.13|mRNA|RNF135|ENSG00000181481.13|ENSG00000181481.13|0|3580	3	74
ENSG00000249884.8|mRNA|RNF103-CHMP3|ENSG00000249884.8|ENSG00000249884.8|0|1503	3	39
ENSG00000188690.12|mRNA|UROS|ENSG00000188690.12|ENSG00000188690.12|0|6643	3	37
ENSG00000188643.10|mRNA|S100A16|ENSG00000188643.10|ENSG00000188643.10|0|1701	3	84
ENSG00000148444.15|mRNA|COMMD3|ENSG00000148444.15|ENSG00000148444.15|0|3317	3	78.3333
ENSG00000211460.11|mRNA|TSN|ENSG00000211460.11|ENSG00000211460.11|0|4407	3	46.6667
ENSG00000167193.7|mRNA|CRK|ENSG00000167193.7|ENSG00000167193.7|0|4090	3	50.3333
ENSG00000168807.16|mRNA|SNTB2|ENSG00000168807.16|ENSG00000168807.16|0|9875	3	61.3333
ENSG00000148671.13|mRNA|ADIRF|ENSG00000148671.13|ENSG00000148671.13|0|998	3	69
ENSG00000179088.14|mRNA|C12orf42|ENSG00000179088.14|ENSG00000179088.14|0|4898	3	69.3333
ENSG00000148672.8|mRNA|GLUD1|ENSG00000148672.8|ENSG00000148672.8|0|3519	3	40
ENSG00000160551.11|mRNA|TAOK1|ENSG00000160551.11|ENSG00000160551.11|0|16980	3	25
ENSG00000256269.7|mRNA|HMBS|ENSG00000256269.7|ENSG00000256269.7|0|4247	3	79.3333
ENSG00000149516.13|mRNA|MS4A3|ENSG00000149516.13|ENSG00000149516.13|0|2095	3	42
ENSG00000149182.14|mRNA|ARFGAP2|ENSG00000149182.14|ENSG00000149182.14|0|5918	3	38.3333
ENSG00000216490.3|mRNA|IFI30|ENSG00000216490.3|ENSG00000216490.3|0|2481	3	58.6667
ENSG00000159842.14|mRNA|ABR|ENSG00000159842.14|ENSG00000159842.14|0|11709	3	50.6667
ENSG00000172336.4|mRNA|POP7|ENSG00000172336.4|ENSG00000172336.4|0|988	3	46
ENSG00000172175.12|mRNA|MALT1|ENSG00000172175.12|ENSG00000172175.12|0|10850	3	49.6667
ENSG00000187231.13|mRNA|SESTD1|ENSG00000187231.13|ENSG00000187231.13|0|11349	3	69.6667
ENSG00000172159.15|mRNA|FRMD3|ENSG00000172159.15|ENSG00000172159.15|0|6486	3	71
ENSG00000250722.5|mRNA|SELENOP|ENSG00000250722.5|ENSG00000250722.5|0|5688	3	66.6667
ENSG00000186470.13|mRNA|BTN3A2|ENSG00000186470.13|ENSG00000186470.13|0|7042	3	51.3333
ENSG00000180398.11|mRNA|MCFD2|ENSG00000180398.11|ENSG00000180398.11|0|5994	3	62.6667
ENSG00000161929.14|mRNA|SCIMP|ENSG00000161929.14|ENSG00000161929.14|0|4208	3	49.6667
ENSG00000002586.18|mRNA|CD99|ENSG00000002586.18|ENSG00000002586.18|0|3284	3	78.6667
ENSG00000273173.5|mRNA|SNURF|ENSG00000273173.5|ENSG00000273173.5|0|1175	3	60
ENSG00000104763.18|mRNA|ASAH1|ENSG00000104763.18|ENSG00000104763.18|0|15378	3	54
ENSG00000075651.15|mRNA|PLD1|ENSG00000075651.15|ENSG00000075651.15|0|12859	3	80
ENSG00000124193.14|mRNA|SRSF6|ENSG00000124193.14|ENSG00000124193.14|0|4593	3	84.3333
ENSG00000111796.3|mRNA|KLRB1|ENSG00000111796.3|ENSG00000111796.3|0|1448	3	41
hsa_circ_0080856|circRNA|hsa_circ_0080856|hsa_circ_0080856|hsa_circ_0080856|0|600	3	81
ENSG00000125354.22|mRNA|SEPT6|ENSG00000125354.22|ENSG00000125354.22|0|6245	3	50
ENSG00000111371.15|mRNA|SLC38A1|ENSG00000111371.15|ENSG00000111371.15|0|10015	3	75.3333
hsa_circ_0083045|circRNA|hsa_circ_0083045|hsa_circ_0083045|hsa_circ_0083045|0|600	3	55.3333
ENSG00000125817.7|mRNA|CENPB|ENSG00000125817.7|ENSG00000125817.7|0|2840	3	6.33333
ENSG00000111328.6|mRNA|CDK2AP1|ENSG00000111328.6|ENSG00000111328.6|0|3117	3	74.6667
ENSG00000281357.2|lncRNA|ARRDC3-AS1|ENSG00000281357.2|ENSG00000281357.2|0|2832	3	76.3333
ENSG00000110025.12|mRNA|SNX15|ENSG00000110025.12|ENSG00000110025.12|0|4915	3	66.6667
ENSG00000130713.15|mRNA|EXOSC2|ENSG00000130713.15|ENSG00000130713.15|0|4240	3	66.6667
ENSG00000130725.7|mRNA|UBE2M|ENSG00000130725.7|ENSG00000130725.7|0|1831	3	37.6667
ENSG00000079102.16|mRNA|RUNX1T1|ENSG00000079102.16|ENSG00000079102.16|0|13535	3	60.6667
ENSG00000108256.8|mRNA|NUFIP2|ENSG00000108256.8|ENSG00000108256.8|0|10850	3	47.6667
hsa_circ_0018815|circRNA|hsa_circ_0018815|hsa_circ_0018815|hsa_circ_0018815|0|600	3	53
hsa_circ_0086462|circRNA|hsa_circ_0086462|hsa_circ_0086462|hsa_circ_0086462|0|600	3	42.3333
ENSG00000131725.13|mRNA|WDR44|ENSG00000131725.13|ENSG00000131725.13|0|4202	3	78.3333
ENSG00000272168.6|lncRNA|CASC15|ENSG00000272168.6|ENSG00000272168.6|0|13289	3	26.6667
ENSG00000020256.19|mRNA|ZFP64|ENSG00000020256.19|ENSG00000020256.19|0|6997	3	62
ENSG00000013583.8|mRNA|HEBP1|ENSG00000013583.8|ENSG00000013583.8|0|3442	3	61
ENSG00000132768.13|mRNA|DPH2|ENSG00000132768.13|ENSG00000132768.13|0|2930	3	78.3333
ENSG00000079462.7|mRNA|PAFAH1B3|ENSG00000079462.7|ENSG00000079462.7|0|1419	3	54
ENSG00000133639.4|mRNA|BTG1|ENSG00000133639.4|ENSG00000133639.4|0|4854	3	61.6667
ENSG00000013275.7|mRNA|PSMC4|ENSG00000013275.7|ENSG00000013275.7|0|2387	3	70.3333
ENSG00000134815.18|mRNA|DHX34|ENSG00000134815.18|ENSG00000134815.18|0|5696	3	70
ENSG00000081923.11|mRNA|ATP8B1|ENSG00000081923.11|ENSG00000081923.11|0|6652	3	75
ENSG00000105298.13|mRNA|CACTIN|ENSG00000105298.13|ENSG00000105298.13|0|5952	3	44
ENSG00000136237.18|mRNA|RAPGEF5|ENSG00000136237.18|ENSG00000136237.18|0|10245	3	70.3333
ENSG00000072506.12|mRNA|HSD17B10|ENSG00000072506.12|ENSG00000072506.12|0|1115	3	33.6667
hsa_circ_0008234|circRNA|hsa_circ_0008234|hsa_circ_0008234|hsa_circ_0008234|0|600	3	66.6667
ENSG00000112561.17|mRNA|TFEB|ENSG00000112561.17|ENSG00000112561.17|0|5648	3	72
ENSG00000115461.4|mRNA|IGFBP5|ENSG00000115461.4|ENSG00000115461.4|0|6442	3	35.3333
ENSG00000117226.11|mRNA|GBP3|ENSG00000117226.11|ENSG00000117226.11|0|4297	3	71
ENSG00000117281.15|mRNA|CD160|ENSG00000117281.15|ENSG00000117281.15|0|3971	3	78
ENSG00000068079.7|mRNA|IFI35|ENSG00000068079.7|ENSG00000068079.7|0|1973	3	88.6667
ENSG00000117394.20|mRNA|SLC2A1|ENSG00000117394.20|ENSG00000117394.20|0|4721	3	71.6667
ENSG00000117114.19|mRNA|ADGRL2|ENSG00000117114.19|ENSG00000117114.19|0|7754	3	42.6667
ENSG00000067182.7|mRNA|TNFRSF1A|ENSG00000067182.7|ENSG00000067182.7|0|4005	3	46
ENSG00000117640.17|mRNA|MTFR1L|ENSG00000117640.17|ENSG00000117640.17|0|5817	3	41.3333
ENSG00000065491.8|mRNA|TBC1D22B|ENSG00000065491.8|ENSG00000065491.8|0|3462	3	66
ENSG00000116701.14|mRNA|NCF2|ENSG00000116701.14|ENSG00000116701.14|0|2928	3	60.3333
ENSG00000118515.11|mRNA|SGK1|ENSG00000118515.11|ENSG00000118515.11|0|9992	3	55.6667
ENSG00000115561.15|mRNA|CHMP3|ENSG00000115561.15|ENSG00000115561.15|0|7018	3	45.3333
ENSG00000115525.17|mRNA|ST3GAL5|ENSG00000115525.17|ENSG00000115525.17|0|16318	3	63.3333
ENSG00000119522.16|mRNA|DENND1A|ENSG00000119522.16|ENSG00000119522.16|0|10256	3	57.3333
ENSG00000062485.18|mRNA|CS|ENSG00000062485.18|ENSG00000062485.18|0|6402	3	43
hsa_circ_0007798|circRNA|hsa_circ_0007798|hsa_circ_0007798|hsa_circ_0007798|0|600	3	48
hsa_circ_0001947|circRNA|hsa_circ_0001947|hsa_circ_0001947|hsa_circ_0001947|0|600	3	69.6667
ENSG00000061676.14|mRNA|NCKAP1|ENSG00000061676.14|ENSG00000061676.14|0|22520	3	81
hsa_circ_0001772|circRNA|hsa_circ_0001772|hsa_circ_0001772|hsa_circ_0001772|0|600	3	21.6667
ENSG00000115295.19|mRNA|CLIP4|ENSG00000115295.19|ENSG00000115295.19|0|7775	3	58
ENSG00000121769.7|mRNA|FABP3|ENSG00000121769.7|ENSG00000121769.7|0|1026	3	43.6667
ENSG00000071205.11|mRNA|ARHGAP10|ENSG00000071205.11|ENSG00000071205.11|0|10759	3	31.6667
hsa_circ_0075796|circRNA|hsa_circ_0075796|hsa_circ_0075796|hsa_circ_0075796|0|600	3	62.3333
ENSG00000114503.10|mRNA|NCBP2|ENSG00000114503.10|ENSG00000114503.10|0|5114	3	83.3333
hsa_circ_0000880|circRNA|hsa_circ_0000880|hsa_circ_0000880|hsa_circ_0000880|0|526	3	21.3333
ENSG00000122483.17|mRNA|CCDC18|ENSG00000122483.17|ENSG00000122483.17|0|5633	3	65.6667
hsa_circ_0007426|circRNA|hsa_circ_0007426|hsa_circ_0007426|hsa_circ_0007426|0|336	3	46.3333
ENSG00000071894.16|mRNA|CPSF1|ENSG00000071894.16|ENSG00000071894.16|0|6072	3	40.3333
hsa_circ_0007795|circRNA|hsa_circ_0007795|hsa_circ_0007795|hsa_circ_0007795|0|600	3	64.3333
ENSG00000085274.15|mRNA|MYNN|ENSG00000085274.15|ENSG00000085274.15|0|5730	3	80.6667
ENSG00000117280.12|mRNA|RAB29|ENSG00000117280.12|ENSG00000117280.12|0|3882	3	52
hsa_circ_0053933|circRNA|hsa_circ_0053933|hsa_circ_0053933|hsa_circ_0053933|0|600	3	88.3333
ENSG00000143575.14|mRNA|HAX1|ENSG00000143575.14|ENSG00000143575.14|0|2155	3	41.3333
ENSG00000099875.14|mRNA|MKNK2|ENSG00000099875.14|ENSG00000099875.14|0|5221	3	51
ENSG00000103005.11|mRNA|USB1|ENSG00000103005.11|ENSG00000103005.11|0|8265	3	52.3333
hsa_circ_0031572|circRNA|hsa_circ_0031572|hsa_circ_0031572|hsa_circ_0031572|0|600	3	69.6667
ENSG00000142875.19|mRNA|PRKACB|ENSG00000142875.19|ENSG00000142875.19|0|6730	3	45.3333
hsa_circ_0042801|circRNA|hsa_circ_0042801|hsa_circ_0042801|hsa_circ_0042801|0|600	3	62.3333
ENSG00000100292.16|mRNA|HMOX1|ENSG00000100292.16|ENSG00000100292.16|0|2405	3	84.3333
ENSG00000087053.18|mRNA|MTMR2|ENSG00000087053.18|ENSG00000087053.18|0|6119	3	25
ENSG00000089876.11|mRNA|DHX32|ENSG00000089876.11|ENSG00000089876.11|0|3948	3	63.6667
ENSG00000100554.11|mRNA|ATP6V1D|ENSG00000100554.11|ENSG00000100554.11|0|4251	3	60.3333
ENSG00000102409.9|mRNA|BEX4|ENSG00000102409.9|ENSG00000102409.9|0|1328	3	55.3333
ENSG00000007312.12|mRNA|CD79B|ENSG00000007312.12|ENSG00000007312.12|0|2080	3	61.6667
ENSG00000087302.8|mRNA|C14orf166|ENSG00000087302.8|ENSG00000087302.8|0|8323	3	72.3333
ENSG00000101558.13|mRNA|VAPA|ENSG00000101558.13|ENSG00000101558.13|0|11880	3	30
ENSG00000104738.16|mRNA|MCM4|ENSG00000104738.16|ENSG00000104738.16|0|6824	3	77.6667
ENSG00000089248.6|mRNA|ERP29|ENSG00000089248.6|ENSG00000089248.6|0|3083	3	79.6667
ENSG00000259330.2|mRNA|INAFM2|ENSG00000259330.2|ENSG00000259330.2|0|3052	3	72.6667
ENSG00000102893.15|mRNA|PHKB|ENSG00000102893.15|ENSG00000102893.15|0|11822	3	85.6667
ENSG00000143889.15|mRNA|HNRNPLL|ENSG00000143889.15|ENSG00000143889.15|0|5923	3	70
ENSG00000005893.15|mRNA|LAMP2|ENSG00000005893.15|ENSG00000005893.15|0|5526	3	66
ENSG00000011052.21|mRNA|NME1-NME2|ENSG00000011052.21|ENSG00000011052.21|0|1241	3	69.3333
ENSG00000137309.19|mRNA|HMGA1|ENSG00000137309.19|ENSG00000137309.19|0|2327	3	61.6667
hsa_circ_0091768|circRNA|hsa_circ_0091768|hsa_circ_0091768|hsa_circ_0091768|0|600	3	83.6667
ENSG00000116741.7|mRNA|RGS2|ENSG00000116741.7|ENSG00000116741.7|0|2096	2	55.5
ENSG00000113851.14|mRNA|CRBN|ENSG00000113851.14|ENSG00000113851.14|0|8068	2	23
ENSG00000112799.8|mRNA|LY86|ENSG00000112799.8|ENSG00000112799.8|0|1254	2	55
ENSG00000214265.11|mRNA|AC124312.1|ENSG00000214265.11|ENSG00000214265.11|0|1590	2	67.5
ENSG00000166526.16|mRNA|ZNF3|ENSG00000166526.16|ENSG00000166526.16|0|5424	2	37
hsa_circ_0007277|circRNA|hsa_circ_0007277|hsa_circ_0007277|hsa_circ_0007277|0|600	2	80.5
ENSG00000213648.10|mRNA|SULT1A4|ENSG00000213648.10|ENSG00000213648.10|0|1979	2	73
hsa_circ_0070808|circRNA|hsa_circ_0070808|hsa_circ_0070808|hsa_circ_0070808|0|504	2	47
hsa_circ_0051849|circRNA|hsa_circ_0051849|hsa_circ_0051849|hsa_circ_0051849|0|236	2	83.5
ENSG00000116977.18|mRNA|LGALS8|ENSG00000116977.18|ENSG00000116977.18|0|9710	2	76
ENSG00000166398.12|mRNA|KIAA0355|ENSG00000166398.12|ENSG00000166398.12|0|7459	2	62
ENSG00000174485.15|mRNA|DENND4A|ENSG00000174485.15|ENSG00000174485.15|0|10623	2	84
ENSG00000183751.14|mRNA|TBL3|ENSG00000183751.14|ENSG00000183751.14|0|7139	2	68.5
ENSG00000166734.18|mRNA|CASC4|ENSG00000166734.18|ENSG00000166734.18|0|6948	2	66.5
ENSG00000235802.1|lncRNA|HCFC1-AS1|ENSG00000235802.1|ENSG00000235802.1|0|350	2	70
ENSG00000166326.6|mRNA|TRIM44|ENSG00000166326.6|ENSG00000166326.6|0|13077	2	82
ENSG00000178732.5|mRNA|GP5|ENSG00000178732.5|ENSG00000178732.5|0|3534	2	65.5
ENSG00000178852.15|mRNA|EFCAB13|ENSG00000178852.15|ENSG00000178852.15|0|6672	2	80.5
ENSG00000112667.12|mRNA|DNPH1|ENSG00000112667.12|ENSG00000112667.12|0|1250	2	60.5
ENSG00000166986.14|mRNA|MARS|ENSG00000166986.14|ENSG00000166986.14|0|7028	2	64
ENSG00000164587.11|mRNA|RPS14|ENSG00000164587.11|ENSG00000164587.11|0|4544	2	23
ENSG00000071994.10|mRNA|PDCD2|ENSG00000071994.10|ENSG00000071994.10|0|6476	2	57.5
ENSG00000167173.18|mRNA|C15orf39|ENSG00000167173.18|ENSG00000167173.18|0|5812	2	91
ENSG00000095585.16|mRNA|BLNK|ENSG00000095585.16|ENSG00000095585.16|0|3655	2	42
hsa_circ_0034414|circRNA|hsa_circ_0034414|hsa_circ_0034414|hsa_circ_0034414|0|592	2	55
ENSG00000112312.9|mRNA|GMNN|ENSG00000112312.9|ENSG00000112312.9|0|2476	2	64.5
ENSG00000091073.19|mRNA|DTX2|ENSG00000091073.19|ENSG00000091073.19|0|5042	2	45.5
ENSG00000177666.16|mRNA|PNPLA2|ENSG00000177666.16|ENSG00000177666.16|0|3843	2	67.5
ENSG00000176046.8|mRNA|NUPR1|ENSG00000176046.8|ENSG00000176046.8|0|5674	2	53.5
hsa_circ_0007017|circRNA|hsa_circ_0007017|hsa_circ_0007017|hsa_circ_0007017|0|600	2	30
hsa_circ_0005806|circRNA|hsa_circ_0005806|hsa_circ_0005806|hsa_circ_0005806|0|600	2	43
ENSG00000204392.10|mRNA|LSM2|ENSG00000204392.10|ENSG00000204392.10|0|1077	2	73.5
ENSG00000184500.14|mRNA|PROS1|ENSG00000184500.14|ENSG00000184500.14|0|4429	2	91
hsa_circ_0006388|circRNA|hsa_circ_0006388|hsa_circ_0006388|hsa_circ_0006388|0|600	2	55.5
hsa_circ_0006435|circRNA|hsa_circ_0006435|hsa_circ_0006435|hsa_circ_0006435|0|600	2	30.5
ENSG00000096070.19|mRNA|BRPF3|ENSG00000096070.19|ENSG00000096070.19|0|6613	2	89.5
ENSG00000240207.6|lncRNA|AC080013.1|ENSG00000240207.6|ENSG00000240207.6|0|4177	2	54
hsa_circ_0052525|circRNA|hsa_circ_0052525|hsa_circ_0052525|hsa_circ_0052525|0|524	2	67.5
ENSG00000116863.10|mRNA|ADPRHL2|ENSG00000116863.10|ENSG00000116863.10|0|1668	2	88.5
hsa_circ_0071198|circRNA|hsa_circ_0071198|hsa_circ_0071198|hsa_circ_0071198|0|600	2	42
ENSG00000092098.16|mRNA|RNF31|ENSG00000092098.16|ENSG00000092098.16|0|4982	2	21
ENSG00000213923.11|mRNA|CSNK1E|ENSG00000213923.11|ENSG00000213923.11|0|6246	2	78
ENSG00000165782.10|mRNA|TMEM55B|ENSG00000165782.10|ENSG00000165782.10|0|3803	2	56.5
ENSG00000204394.12|mRNA|VARS|ENSG00000204394.12|ENSG00000204394.12|0|6081	2	94
ENSG00000184602.5|mRNA|SNN|ENSG00000184602.5|ENSG00000184602.5|0|3312	2	50.5
ENSG00000164896.19|mRNA|FASTK|ENSG00000164896.19|ENSG00000164896.19|0|3805	2	41.5
ENSG00000165819.11|mRNA|METTL3|ENSG00000165819.11|ENSG00000165819.11|0|5894	2	63
ENSG00000092094.10|mRNA|OSGEP|ENSG00000092094.10|ENSG00000092094.10|0|5037	2	72
ENSG00000070785.16|mRNA|EIF2B3|ENSG00000070785.16|ENSG00000070785.16|0|3411	2	52.5
hsa_circ_0008832|circRNA|hsa_circ_0008832|hsa_circ_0008832|hsa_circ_0008832|0|590	2	81
ENSG00000164867.10|mRNA|NOS3|ENSG00000164867.10|ENSG00000164867.10|0|5953	2	49
ENSG00000177646.18|mRNA|ACAD9|ENSG00000177646.18|ENSG00000177646.18|0|4327	2	40
ENSG00000164828.17|mRNA|SUN1|ENSG00000164828.17|ENSG00000164828.17|0|11811	2	86
ENSG00000115274.14|mRNA|INO80B|ENSG00000115274.14|ENSG00000115274.14|0|1522	2	63.5
ENSG00000239445.5|lncRNA|ST3GAL6-AS1|ENSG00000239445.5|ENSG00000239445.5|0|843	2	42.5
ENSG00000114786.16|mRNA|ABHD14A-ACY1|ENSG00000114786.16|ENSG00000114786.16|0|4761	2	33
ENSG00000174917.8|mRNA|C19orf70|ENSG00000174917.8|ENSG00000174917.8|0|1854	2	52.5
ENSG00000173559.12|mRNA|NABP1|ENSG00000173559.12|ENSG00000173559.12|0|13806	2	53.5
ENSG00000104915.14|mRNA|STX10|ENSG00000104915.14|ENSG00000104915.14|0|1796	2	59
hsa_circ_0053862|circRNA|hsa_circ_0053862|hsa_circ_0053862|hsa_circ_0053862|0|600	2	89.5
ENSG00000173535.13|mRNA|TNFRSF10C|ENSG00000173535.13|ENSG00000173535.13|0|2625	2	49.5
ENSG00000170011.13|mRNA|MYRIP|ENSG00000170011.13|ENSG00000170011.13|0|5872	2	78
ENSG00000169946.13|mRNA|ZFPM2|ENSG00000169946.13|ENSG00000169946.13|0|7775	2	44.5
ENSG00000105887.10|mRNA|MTPN|ENSG00000105887.10|ENSG00000105887.10|0|3775	2	50.5
hsa_circ_0055019|circRNA|hsa_circ_0055019|hsa_circ_0055019|hsa_circ_0055019|0|600	2	28.5
ENSG00000106049.8|mRNA|HIBADH|ENSG00000106049.8|ENSG00000106049.8|0|2323	2	50
ENSG00000171916.16|mRNA|LGALS9C|ENSG00000171916.16|ENSG00000171916.16|0|4754	2	61.5
ENSG00000103942.12|mRNA|HOMER2|ENSG00000103942.12|ENSG00000103942.12|0|14685	2	70.5
ENSG00000225643.1|lncRNA|AL606491.1|ENSG00000225643.1|ENSG00000225643.1|0|483	2	54
ENSG00000106484.14|mRNA|MEST|ENSG00000106484.14|ENSG00000106484.14|0|4631	2	43
ENSG00000172113.8|mRNA|NME6|ENSG00000172113.8|ENSG00000172113.8|0|4716	2	51
ENSG00000103381.11|mRNA|CPPED1|ENSG00000103381.11|ENSG00000103381.11|0|6484	2	37.5
ENSG00000180354.15|mRNA|MTURN|ENSG00000180354.15|ENSG00000180354.15|0|6532	2	83.5
hsa_circ_0019297|circRNA|hsa_circ_0019297|hsa_circ_0019297|hsa_circ_0019297|0|600	2	45
ENSG00000180304.14|mRNA|OAZ2|ENSG00000180304.14|ENSG00000180304.14|0|7671	2	20
ENSG00000169592.14|mRNA|INO80E|ENSG00000169592.14|ENSG00000169592.14|0|6076	2	58
ENSG00000105875.13|mRNA|WDR91|ENSG00000105875.13|ENSG00000105875.13|0|6032	2	71.5
ENSG00000170185.9|mRNA|USP38|ENSG00000170185.9|ENSG00000170185.9|0|7787	2	27.5
ENSG00000182180.13|mRNA|MRPS16|ENSG00000182180.13|ENSG00000182180.13|0|2794	2	23.5
ENSG00000105401.8|mRNA|CDC37|ENSG00000105401.8|ENSG00000105401.8|0|3041	2	72.5
ENSG00000171608.15|mRNA|PIK3CD|ENSG00000171608.15|ENSG00000171608.15|0|6332	2	64.5
hsa_circ_0030567|circRNA|hsa_circ_0030567|hsa_circ_0030567|hsa_circ_0030567|0|600	2	58
ENSG00000220201.7|mRNA|ZGLP1|ENSG00000220201.7|ENSG00000220201.7|0|2431	2	19.5
ENSG00000104408.9|mRNA|EIF3E|ENSG00000104408.9|ENSG00000104408.9|0|6005	2	69
ENSG00000181090.20|mRNA|EHMT1|ENSG00000181090.20|ENSG00000181090.20|0|22217	2	66
hsa_circ_0056668|circRNA|hsa_circ_0056668|hsa_circ_0056668|hsa_circ_0056668|0|600	2	75
hsa_circ_0056731|circRNA|hsa_circ_0056731|hsa_circ_0056731|hsa_circ_0056731|0|600	2	54
ENSG00000081377.16|mRNA|CDC14B|ENSG00000081377.16|ENSG00000081377.16|0|10462	2	64
ENSG00000105647.16|mRNA|PIK3R2|ENSG00000105647.16|ENSG00000105647.16|0|4524	2	31
ENSG00000105738.10|mRNA|SIPA1L3|ENSG00000105738.10|ENSG00000105738.10|0|10335	2	48.5
ENSG00000081760.16|mRNA|AACS|ENSG00000081760.16|ENSG00000081760.16|0|16094	2	78.5
ENSG00000105755.7|mRNA|ETHE1|ENSG00000105755.7|ENSG00000105755.7|0|1604	2	65.5
hsa_circ_0025721|circRNA|hsa_circ_0025721|hsa_circ_0025721|hsa_circ_0025721|0|600	2	16.5
ENSG00000224397.5|lncRNA|SMIM25|ENSG00000224397.5|ENSG00000224397.5|0|2451	2	47.5
ENSG00000169583.12|mRNA|CLIC3|ENSG00000169583.12|ENSG00000169583.12|0|1177	2	14.5
ENSG00000172673.10|mRNA|THEMIS|ENSG00000172673.10|ENSG00000172673.10|0|4309	2	37
ENSG00000179950.13|mRNA|PUF60|ENSG00000179950.13|ENSG00000179950.13|0|5424	2	52.5
ENSG00000167851.13|mRNA|CD300A|ENSG00000167851.13|ENSG00000167851.13|0|2686	2	77.5
ENSG00000168056.15|mRNA|LTBP3|ENSG00000168056.15|ENSG00000168056.15|0|10298	2	74
hsa_circ_0067528|circRNA|hsa_circ_0067528|hsa_circ_0067528|hsa_circ_0067528|0|600	2	71
ENSG00000075975.15|mRNA|MKRN2|ENSG00000075975.15|ENSG00000075975.15|0|2848	2	60.5
ENSG00000102034.16|mRNA|ELF4|ENSG00000102034.16|ENSG00000102034.16|0|4316	2	47.5
ENSG00000231725.1|pseudogene|VN1R110P|ENSG00000231725.1|ENSG00000231725.1|0|971	2	30
hsa_circ_0069228|circRNA|hsa_circ_0069228|hsa_circ_0069228|hsa_circ_0069228|0|600	2	48
ENSG00000167774.2|mRNA|AC010323.1|ENSG00000167774.2|ENSG00000167774.2|0|580	2	80
ENSG00000110717.12|mRNA|NDUFS8|ENSG00000110717.12|ENSG00000110717.12|0|4523	2	66
ENSG00000167703.14|mRNA|SLC43A2|ENSG00000167703.14|ENSG00000167703.14|0|10606	2	47
ENSG00000173418.11|mRNA|NAA20|ENSG00000173418.11|ENSG00000173418.11|0|2376	2	61.5
ENSG00000144224.16|mRNA|UBXN4|ENSG00000144224.16|ENSG00000144224.16|0|5112	2	71.5
hsa_circ_0009084|circRNA|hsa_circ_0009084|hsa_circ_0009084|hsa_circ_0009084|0|600	2	67
ENSG00000101336.13|mRNA|HCK|ENSG00000101336.13|ENSG00000101336.13|0|3092	2	44.5
ENSG00000206573.8|lncRNA|THUMPD3-AS1|ENSG00000206573.8|ENSG00000206573.8|0|6275	2	62.5
ENSG00000111144.9|mRNA|LTA4H|ENSG00000111144.9|ENSG00000111144.9|0|7350	2	80
ENSG00000110497.14|mRNA|AMBRA1|ENSG00000110497.14|ENSG00000110497.14|0|7673	2	63.5
ENSG00000108961.13|mRNA|RANGRF|ENSG00000108961.13|ENSG00000108961.13|0|1577	2	71.5
hsa_circ_0017312|circRNA|hsa_circ_0017312|hsa_circ_0017312|hsa_circ_0017312|0|466	2	23.5
ENSG00000108963.17|mRNA|DPH1|ENSG00000108963.17|ENSG00000108963.17|0|5757	2	62.5
ENSG00000164338.9|mRNA|UTP15|ENSG00000164338.9|ENSG00000164338.9|0|6321	2	90.5
ENSG00000109103.11|mRNA|UNC119|ENSG00000109103.11|ENSG00000109103.11|0|5128	2	70
ENSG00000182871.14|mRNA|COL18A1|ENSG00000182871.14|ENSG00000182871.14|0|8525	2	84
ENSG00000102753.9|mRNA|KPNA3|ENSG00000102753.9|ENSG00000102753.9|0|4474	2	45.5
ENSG00000206047.2|mRNA|DEFA1|ENSG00000206047.2|ENSG00000206047.2|0|486	2	61
ENSG00000109339.20|mRNA|MAPK10|ENSG00000109339.20|ENSG00000109339.20|0|42646	2	55.5
ENSG00000168385.17|mRNA|SEPT2|ENSG00000168385.17|ENSG00000168385.17|0|7378	2	82.5
hsa_circ_0015467|circRNA|hsa_circ_0015467|hsa_circ_0015467|hsa_circ_0015467|0|600	2	8
ENSG00000168961.16|mRNA|LGALS9|ENSG00000168961.16|ENSG00000168961.16|0|5714	2	74
hsa_circ_0014614|circRNA|hsa_circ_0014614|hsa_circ_0014614|hsa_circ_0014614|0|404	2	75.5
hsa_circ_0013731|circRNA|hsa_circ_0013731|hsa_circ_0013731|hsa_circ_0013731|0|512	2	65.5
ENSG00000168615.11|mRNA|ADAM9|ENSG00000168615.11|ENSG00000168615.11|0|6913	2	94.5
ENSG00000077254.14|mRNA|USP33|ENSG00000077254.14|ENSG00000077254.14|0|6918	2	43
ENSG00000111554.14|mRNA|MDM1|ENSG00000111554.14|ENSG00000111554.14|0|6549	2	56.5
hsa_circ_0004909|circRNA|hsa_circ_0004909|hsa_circ_0004909|hsa_circ_0004909|0|600	2	62.5
ENSG00000184838.14|mRNA|PRR16|ENSG00000184838.14|ENSG00000184838.14|0|2274	2	42
ENSG00000012779.10|mRNA|ALOX5|ENSG00000012779.10|ENSG00000012779.10|0|3730	2	55.5
ENSG00000134698.10|mRNA|AGO4|ENSG00000134698.10|ENSG00000134698.10|0|7267	2	60.5
ENSG00000151151.5|mRNA|IPMK|ENSG00000151151.5|ENSG00000151151.5|0|6133	2	60
ENSG00000151023.16|mRNA|ENKUR|ENSG00000151023.16|ENSG00000151023.16|0|4076	2	31
ENSG00000134987.11|mRNA|WDR36|ENSG00000134987.11|ENSG00000134987.11|0|7656	2	59
ENSG00000150753.11|mRNA|CCT5|ENSG00000150753.11|ENSG00000150753.11|0|5839	2	44.5
ENSG00000267855.5|mRNA|NDUFA7|ENSG00000267855.5|ENSG00000267855.5|0|1413	2	59
ENSG00000135446.16|mRNA|CDK4|ENSG00000135446.16|ENSG00000135446.16|0|3168	2	54.5
ENSG00000150054.18|mRNA|MPP7|ENSG00000150054.18|ENSG00000150054.18|0|6167	2	50
ENSG00000267168.1|mRNA|AC005837.2|ENSG00000267168.1|ENSG00000267168.1|0|479	2	65
ENSG00000130313.6|mRNA|PGLS|ENSG00000130313.6|ENSG00000130313.6|0|2847	2	86
ENSG00000255479.1|lncRNA|AP001189.6|ENSG00000255479.1|ENSG00000255479.1|0|831	2	39.5
ENSG00000136573.12|mRNA|BLK|ENSG00000136573.12|ENSG00000136573.12|0|4803	2	28.5
ENSG00000011258.15|mRNA|MBTD1|ENSG00000011258.15|ENSG00000011258.15|0|7201	2	75
ENSG00000196683.10|mRNA|TOMM7|ENSG00000196683.10|ENSG00000196683.10|0|1751	2	69.5
ENSG00000255717.6|lncRNA|SNHG1|ENSG00000255717.6|ENSG00000255717.6|0|3756	2	90.5
ENSG00000137033.11|mRNA|IL33|ENSG00000137033.11|ENSG00000137033.11|0|3253	2	78.5
ENSG00000265491.4|mRNA|RNF115|ENSG00000265491.4|ENSG00000265491.4|0|11041	2	53.5
ENSG00000148688.13|mRNA|RPP30|ENSG00000148688.13|ENSG00000148688.13|0|4653	2	35
ENSG00000196497.16|mRNA|IPO4|ENSG00000196497.16|ENSG00000196497.16|0|5007	2	52
ENSG00000151552.11|mRNA|QDPR|ENSG00000151552.11|ENSG00000151552.11|0|3059	2	40.5
ENSG00000255325.2|lncRNA|AC108136.1|ENSG00000255325.2|ENSG00000255325.2|0|631	2	32.5
ENSG00000151689.12|mRNA|INPP1|ENSG00000151689.12|ENSG00000151689.12|0|3676	2	87
ENSG00000155975.9|mRNA|VPS37A|ENSG00000155975.9|ENSG00000155975.9|0|6784	2	47.5
hsa_circ_0086425|circRNA|hsa_circ_0086425|hsa_circ_0086425|hsa_circ_0086425|0|600	2	56.5
ENSG00000130764.9|mRNA|LRRC47|ENSG00000130764.9|ENSG00000130764.9|0|4516	2	58
ENSG00000254717.2|pseudogene|GLYATL1P2|ENSG00000254717.2|ENSG00000254717.2|0|1161	2	24.5
ENSG00000131475.6|mRNA|VPS25|ENSG00000131475.6|ENSG00000131475.6|0|2404	2	58
ENSG00000154237.12|mRNA|LRRK1|ENSG00000154237.12|ENSG00000154237.12|0|17600	2	34
ENSG00000131495.8|mRNA|NDUFA2|ENSG00000131495.8|ENSG00000131495.8|0|1488	2	39.5
ENSG00000164292.12|mRNA|RHOBTB3|ENSG00000164292.12|ENSG00000164292.12|0|8833	2	37
ENSG00000153879.8|mRNA|CEBPG|ENSG00000153879.8|ENSG00000153879.8|0|4411	2	94
ENSG00000254877.1|pseudogene|AP001636.2|ENSG00000254877.1|ENSG00000254877.1|0|696	2	47.5
ENSG00000272949.1|lncRNA|AC093668.2|ENSG00000272949.1|ENSG00000272949.1|0|3569	2	60
ENSG00000270240.2|lncRNA|AC015849.1|ENSG00000270240.2|ENSG00000270240.2|0|755	2	65.5
ENSG00000013288.8|mRNA|MAN2B2|ENSG00000013288.8|ENSG00000013288.8|0|8898	2	49.5
ENSG00000133321.10|mRNA|RARRES3|ENSG00000133321.10|ENSG00000133321.10|0|1299	2	44.5
ENSG00000133805.15|mRNA|AMPD3|ENSG00000133805.15|ENSG00000133805.15|0|6793	2	50
ENSG00000269469.1|mRNA|AC010619.1|ENSG00000269469.1|ENSG00000269469.1|0|675	2	63.5
ENSG00000134369.15|mRNA|NAV1|ENSG00000134369.15|ENSG00000134369.15|0|22453	2	54.5
ENSG00000137818.11|mRNA|RPLP1|ENSG00000137818.11|ENSG00000137818.11|0|3271	2	70.5
ENSG00000148572.15|mRNA|NRBF2|ENSG00000148572.15|ENSG00000148572.15|0|1901	2	89.5
ENSG00000262919.7|mRNA|FAM58A|ENSG00000262919.7|ENSG00000262919.7|0|1730	2	65.5
ENSG00000008838.19|mRNA|MED24|ENSG00000008838.19|ENSG00000008838.19|0|6962	2	53
ENSG00000146066.2|mRNA|HIGD2A|ENSG00000146066.2|ENSG00000146066.2|0|668	2	56
ENSG00000142197.12|mRNA|DOPEY2|ENSG00000142197.12|ENSG00000142197.12|0|9030	2	69
ENSG00000142347.16|mRNA|MYO1F|ENSG00000142347.16|ENSG00000142347.16|0|8550	2	55.5
ENSG00000142512.14|mRNA|SIGLEC10|ENSG00000142512.14|ENSG00000142512.14|0|3667	2	74.5
ENSG00000259577.1|lncRNA|CERNA1|ENSG00000259577.1|ENSG00000259577.1|0|2096	2	46
ENSG00000142684.8|mRNA|ZNF593|ENSG00000142684.8|ENSG00000142684.8|0|769	2	91.5
ENSG00000142765.17|mRNA|SYTL1|ENSG00000142765.17|ENSG00000142765.17|0|5584	2	69
ENSG00000197776.7|mRNA|KLHDC1|ENSG00000197776.7|ENSG00000197776.7|0|3006	2	36.5
ENSG00000258418.1|lncRNA|AL352977.1|ENSG00000258418.1|ENSG00000258418.1|0|453	2	87.5
ENSG00000143149.12|mRNA|ALDH9A1|ENSG00000143149.12|ENSG00000143149.12|0|3308	2	59
ENSG00000145335.15|mRNA|SNCA|ENSG00000145335.15|ENSG00000145335.15|0|4014	2	56
ENSG00000143486.15|mRNA|EIF2D|ENSG00000143486.15|ENSG00000143486.15|0|8064	2	72
hsa_circ_0091680|circRNA|hsa_circ_0091680|hsa_circ_0091680|hsa_circ_0091680|0|600	2	58
ENSG00000198286.9|mRNA|CARD11|ENSG00000198286.9|ENSG00000198286.9|0|4707	2	72.5
ENSG00000258551.5|lncRNA|CRAT37|ENSG00000258551.5|ENSG00000258551.5|0|2609	2	58
ENSG00000006194.9|mRNA|ZNF263|ENSG00000006194.9|ENSG00000006194.9|0|6945	2	79.5
ENSG00000005022.5|mRNA|SLC25A5|ENSG00000005022.5|ENSG00000005022.5|0|1500	2	63.5
ENSG00000197563.10|mRNA|PIGN|ENSG00000197563.10|ENSG00000197563.10|0|19003	2	56.5
ENSG00000141753.6|mRNA|IGFBP4|ENSG00000141753.6|ENSG00000141753.6|0|2200	2	59.5
ENSG00000262660.1|mRNA|AC139530.2|ENSG00000262660.1|ENSG00000262660.1|0|1922	2	42.5
ENSG00000146757.13|mRNA|ZNF92|ENSG00000146757.13|ENSG00000146757.13|0|3512	2	76
ENSG00000138744.14|mRNA|NAAA|ENSG00000138744.14|ENSG00000138744.14|0|4459	2	60.5
hsa_circ_0091360|circRNA|hsa_circ_0091360|hsa_circ_0091360|hsa_circ_0091360|0|600	2	63.5
ENSG00000139133.6|mRNA|ALG10|ENSG00000139133.6|ENSG00000139133.6|0|4389	2	94.5
ENSG00000139370.11|mRNA|SLC15A4|ENSG00000139370.11|ENSG00000139370.11|0|5496	2	57
ENSG00000256825.4|mRNA|AC026786.1|ENSG00000256825.4|ENSG00000256825.4|0|1374	2	50
ENSG00000197070.13|mRNA|ARRDC1|ENSG00000197070.13|ENSG00000197070.13|0|3821	2	78
ENSG00000147604.13|mRNA|RPL7|ENSG00000147604.13|ENSG00000147604.13|0|2907	2	54.5
ENSG00000261840.2|lncRNA|AC093249.6|ENSG00000261840.2|ENSG00000261840.2|0|1148	2	37.5
ENSG00000261771.5|lncRNA|DNAAF4-CCPG1|ENSG00000261771.5|ENSG00000261771.5|0|4589	2	80.5
ENSG00000260916.7|mRNA|CCPG1|ENSG00000260916.7|ENSG00000260916.7|0|8790	2	81.5
ENSG00000008988.9|mRNA|RPS20|ENSG00000008988.9|ENSG00000008988.9|0|3002	2	80.5
ENSG00000257335.8|mRNA|MGAM|ENSG00000257335.8|ENSG00000257335.8|0|10767	2	57
ENSG00000140905.10|mRNA|GCSH|ENSG00000140905.10|ENSG00000140905.10|0|3677	2	57.5
ENSG00000147162.13|mRNA|OGT|ENSG00000147162.13|ENSG00000147162.13|0|9812	2	76
ENSG00000008853.16|mRNA|RHOBTB2|ENSG00000008853.16|ENSG00000008853.16|0|6580	2	10.5
ENSG00000141293.15|mRNA|SKAP1|ENSG00000141293.15|ENSG00000141293.15|0|2648	2	50
ENSG00000146909.7|mRNA|NOM1|ENSG00000146909.7|ENSG00000146909.7|0|7788	2	35
ENSG00000130640.13|mRNA|TUBGCP2|ENSG00000130640.13|ENSG00000130640.13|0|7697	2	48
ENSG00000022267.16|mRNA|FHL1|ENSG00000022267.16|ENSG00000022267.16|0|5997	2	84.5
hsa_circ_0078762|circRNA|hsa_circ_0078762|hsa_circ_0078762|hsa_circ_0078762|0|600	2	41
hsa_circ_0075272|circRNA|hsa_circ_0075272|hsa_circ_0075272|hsa_circ_0075272|0|600	2	43
hsa_circ_0001541|circRNA|hsa_circ_0001541|hsa_circ_0001541|hsa_circ_0001541|0|600	2	89.5
ENSG00000185825.15|mRNA|BCAP31|ENSG00000185825.15|ENSG00000185825.15|0|2624	2	50
ENSG00000162444.11|mRNA|RBP7|ENSG00000162444.11|ENSG00000162444.11|0|861	2	65.5
ENSG00000058668.14|mRNA|ATP2B4|ENSG00000058668.14|ENSG00000058668.14|0|9721	2	43
ENSG00000161981.10|mRNA|SNRNP25|ENSG00000161981.10|ENSG00000161981.10|0|3060	2	13.5
ENSG00000161970.12|mRNA|RPL26|ENSG00000161970.12|ENSG00000161970.12|0|2472	2	90
ENSG00000122786.19|mRNA|CALD1|ENSG00000122786.19|ENSG00000122786.19|0|9843	2	47
ENSG00000122862.4|mRNA|SRGN|ENSG00000122862.4|ENSG00000122862.4|0|1220	2	64
ENSG00000161057.11|mRNA|PSMC2|ENSG00000161057.11|ENSG00000161057.11|0|3547	2	64
hsa_circ_0000303|circRNA|hsa_circ_0000303|hsa_circ_0000303|hsa_circ_0000303|0|600	2	76
ENSG00000160783.19|mRNA|PMF1|ENSG00000160783.19|ENSG00000160783.19|0|2520	2	28
ENSG00000051108.14|mRNA|HERPUD1|ENSG00000051108.14|ENSG00000051108.14|0|5155	2	52
ENSG00000186298.11|mRNA|PPP1CC|ENSG00000186298.11|ENSG00000186298.11|0|6906	2	59
ENSG00000249751.3|mRNA|ECSCR|ENSG00000249751.3|ENSG00000249751.3|0|1035	2	79.5
hsa_circ_0000119|circRNA|hsa_circ_0000119|hsa_circ_0000119|hsa_circ_0000119|0|600	2	88.5
ENSG00000160256.12|mRNA|FAM207A|ENSG00000160256.12|ENSG00000160256.12|0|1402	2	50.5
hsa_circ_0000117|circRNA|hsa_circ_0000117|hsa_circ_0000117|hsa_circ_0000117|0|600	2	80
hsa_circ_0001730|circRNA|hsa_circ_0001730|hsa_circ_0001730|hsa_circ_0001730|0|600	2	58.5
ENSG00000120129.5|mRNA|DUSP1|ENSG00000120129.5|ENSG00000120129.5|0|2019	2	82
ENSG00000160194.17|mRNA|NDUFV3|ENSG00000160194.17|ENSG00000160194.17|0|6345	2	74
ENSG00000248360.7|lncRNA|LINC00504|ENSG00000248360.7|ENSG00000248360.7|0|5095	2	16.5
ENSG00000242574.8|mRNA|HLA-DMB|ENSG00000242574.8|ENSG00000242574.8|0|4655	2	50.5
ENSG00000164039.14|mRNA|BDH2|ENSG00000164039.14|ENSG00000164039.14|0|3383	2	43.5
ENSG00000163882.9|mRNA|POLR2H|ENSG00000163882.9|ENSG00000163882.9|0|3146	2	51
ENSG00000117543.20|mRNA|DPH5|ENSG00000117543.20|ENSG00000117543.20|0|2970	2	35.5
ENSG00000163788.13|mRNA|SNRK|ENSG00000163788.13|ENSG00000163788.13|0|6981	2	94
hsa_circ_0004039|circRNA|hsa_circ_0004039|hsa_circ_0004039|hsa_circ_0004039|0|600	2	57.5
ENSG00000245281.6|lncRNA|AC124242.1|ENSG00000245281.6|ENSG00000245281.6|0|1834	2	53.5
ENSG00000118181.10|mRNA|RPS25|ENSG00000118181.10|ENSG00000118181.10|0|1477	2	58.5
ENSG00000247774.6|lncRNA|PCED1B-AS1|ENSG00000247774.6|ENSG00000247774.6|0|3092	2	68
hsa_circ_0073526|circRNA|hsa_circ_0073526|hsa_circ_0073526|hsa_circ_0073526|0|600	2	55
ENSG00000185236.11|mRNA|RAB11B|ENSG00000185236.11|ENSG00000185236.11|0|2470	2	33.5
ENSG00000163682.15|mRNA|RPL9|ENSG00000163682.15|ENSG00000163682.15|0|3259	2	66.5
ENSG00000185475.10|mRNA|TMEM179B|ENSG00000185475.10|ENSG00000185475.10|0|1496	2	55
ENSG00000064703.11|mRNA|DDX20|ENSG00000064703.11|ENSG00000064703.11|0|6019	2	63.5
ENSG00000119013.8|mRNA|NDUFB3|ENSG00000119013.8|ENSG00000119013.8|0|1103	2	63.5
ENSG00000204231.10|mRNA|RXRB|ENSG00000204231.10|ENSG00000204231.10|0|3920	2	70.5
ENSG00000163382.11|mRNA|NAXE|ENSG00000163382.11|ENSG00000163382.11|0|1933	2	41.5
ENSG00000123992.18|mRNA|DNPEP|ENSG00000123992.18|ENSG00000123992.18|0|4734	2	80.5
ENSG00000095485.17|mRNA|CWF19L1|ENSG00000095485.17|ENSG00000095485.17|0|3985	2	64
ENSG00000187840.4|mRNA|EIF4EBP1|ENSG00000187840.4|ENSG00000187840.4|0|1073	2	46.5
ENSG00000250361.7|mRNA|GYPB|ENSG00000250361.7|ENSG00000250361.7|0|1566	2	80
ENSG00000125637.15|mRNA|PSD4|ENSG00000125637.15|ENSG00000125637.15|0|13442	2	50
ENSG00000284194.1|mRNA|SCO2|ENSG00000284194.1|ENSG00000284194.1|0|1196	2	55.5
ENSG00000159111.12|mRNA|MRPL10|ENSG00000159111.12|ENSG00000159111.12|0|2764	2	82
ENSG00000033327.12|mRNA|GAB2|ENSG00000033327.12|ENSG00000033327.12|0|6771	2	46
ENSG00000203710.10|mRNA|CR1|ENSG00000203710.10|ENSG00000203710.10|0|11465	2	73.5
ENSG00000156983.15|mRNA|BRPF1|ENSG00000156983.15|ENSG00000156983.15|0|5477	2	54
hsa_circ_0084874|circRNA|hsa_circ_0084874|hsa_circ_0084874|hsa_circ_0084874|0|568	2	63
ENSG00000281348.1|mRNA|AC120114.5|ENSG00000281348.1|ENSG00000281348.1|0|556	2	68.5
hsa_circ_0000061|circRNA|hsa_circ_0000061|hsa_circ_0000061|hsa_circ_0000061|0|600	2	87.5
ENSG00000159579.13|mRNA|RSPRY1|ENSG00000159579.13|ENSG00000159579.13|0|6064	2	60
ENSG00000128050.8|mRNA|PAICS|ENSG00000128050.8|ENSG00000128050.8|0|7517	2	66
ENSG00000158321.15|mRNA|AUTS2|ENSG00000158321.15|ENSG00000158321.15|0|10420	2	72
ENSG00000186818.12|mRNA|LILRB4|ENSG00000186818.12|ENSG00000186818.12|0|6328	2	51
ENSG00000156697.12|mRNA|UTP14A|ENSG00000156697.12|ENSG00000156697.12|0|4087	2	35
ENSG00000128739.21|mRNA|SNRPN|ENSG00000128739.21|ENSG00000128739.21|0|2929	2	80
ENSG00000124191.17|mRNA|TOX2|ENSG00000124191.17|ENSG00000124191.17|0|3223	2	30
hsa_circ_0053419|circRNA|hsa_circ_0053419|hsa_circ_0053419|hsa_circ_0053419|0|600	1	44
hsa_circ_0074837|circRNA|hsa_circ_0074837|hsa_circ_0074837|hsa_circ_0074837|0|600	1	29
hsa_circ_0085601|circRNA|hsa_circ_0085601|hsa_circ_0085601|hsa_circ_0085601|0|600	1	32
ENSG00000204227.4|mRNA|RING1|ENSG00000204227.4|ENSG00000204227.4|0|1818	1	40
hsa_circ_0071209|circRNA|hsa_circ_0071209|hsa_circ_0071209|hsa_circ_0071209|0|600	1	34
ENSG00000204387.12|mRNA|C6orf48|ENSG00000204387.12|ENSG00000204387.12|0|1801	1	82
ENSG00000205531.12|mRNA|NAP1L4|ENSG00000205531.12|ENSG00000205531.12|0|5200	1	29
hsa_circ_0084608|circRNA|hsa_circ_0084608|hsa_circ_0084608|hsa_circ_0084608|0|600	1	61
hsa_circ_0091361|circRNA|hsa_circ_0091361|hsa_circ_0091361|hsa_circ_0091361|0|600	1	17
hsa_circ_0053859|circRNA|hsa_circ_0053859|hsa_circ_0053859|hsa_circ_0053859|0|600	1	78
ENSG00000212224.1|snoRNA|SNORA26|ENSG00000212224.1|ENSG00000212224.1|0|122	1	87
ENSG00000204351.11|mRNA|SKIV2L|ENSG00000204351.11|ENSG00000204351.11|0|5565	1	98
hsa_circ_0086421|circRNA|hsa_circ_0086421|hsa_circ_0086421|hsa_circ_0086421|0|600	1	20
hsa_circ_0049082|circRNA|hsa_circ_0049082|hsa_circ_0049082|hsa_circ_0049082|0|370	1	52
hsa_circ_0091365|circRNA|hsa_circ_0091365|hsa_circ_0091365|hsa_circ_0091365|0|600	1	49
hsa_circ_0052941|circRNA|hsa_circ_0052941|hsa_circ_0052941|hsa_circ_0052941|0|600	1	86
hsa_circ_0067047|circRNA|hsa_circ_0067047|hsa_circ_0067047|hsa_circ_0067047|0|600	1	57
hsa_circ_0072593|circRNA|hsa_circ_0072593|hsa_circ_0072593|hsa_circ_0072593|0|540	1	26
hsa_circ_0071189|circRNA|hsa_circ_0071189|hsa_circ_0071189|hsa_circ_0071189|0|600	1	62
hsa_circ_0066278|circRNA|hsa_circ_0066278|hsa_circ_0066278|hsa_circ_0066278|0|600	1	78
ENSG00000198826.10|mRNA|ARHGAP11A|ENSG00000198826.10|ENSG00000198826.10|0|6428	1	79
ENSG00000205126.2|mRNA|ACCSL|ENSG00000205126.2|ENSG00000205126.2|0|1867	1	99
hsa_circ_0080850|circRNA|hsa_circ_0080850|hsa_circ_0080850|hsa_circ_0080850|0|600	1	59
hsa_circ_0065284|circRNA|hsa_circ_0065284|hsa_circ_0065284|hsa_circ_0065284|0|440	1	59
hsa_circ_0084119|circRNA|hsa_circ_0084119|hsa_circ_0084119|hsa_circ_0084119|0|600	1	47
hsa_circ_0054618|circRNA|hsa_circ_0054618|hsa_circ_0054618|hsa_circ_0054618|0|600	1	24
hsa_circ_0070800|circRNA|hsa_circ_0070800|hsa_circ_0070800|hsa_circ_0070800|0|600	1	85
hsa_circ_0088047|circRNA|hsa_circ_0088047|hsa_circ_0088047|hsa_circ_0088047|0|600	1	54
hsa_circ_0080831|circRNA|hsa_circ_0080831|hsa_circ_0080831|hsa_circ_0080831|0|600	1	19
ENSG00000204136.10|pseudogene|GGTA1P|ENSG00000204136.10|ENSG00000204136.10|0|4501	1	50
hsa_circ_0056198|circRNA|hsa_circ_0056198|hsa_circ_0056198|hsa_circ_0056198|0|600	1	35
hsa_circ_0088057|circRNA|hsa_circ_0088057|hsa_circ_0088057|hsa_circ_0088057|0|600	1	21
hsa_circ_0089216|circRNA|hsa_circ_0089216|hsa_circ_0089216|hsa_circ_0089216|0|182	1	33
hsa_circ_0070201|circRNA|hsa_circ_0070201|hsa_circ_0070201|hsa_circ_0070201|0|600	1	90
hsa_circ_0069986|circRNA|hsa_circ_0069986|hsa_circ_0069986|hsa_circ_0069986|0|522	1	97
ENSG00000205763.13|pseudogene|RP9P|ENSG00000205763.13|ENSG00000205763.13|0|1433	1	71
ENSG00000198829.6|mRNA|SUCNR1|ENSG00000198829.6|ENSG00000198829.6|0|4181	1	48
hsa_circ_0058042|circRNA|hsa_circ_0058042|hsa_circ_0058042|hsa_circ_0058042|0|600	1	93
hsa_circ_0077237|circRNA|hsa_circ_0077237|hsa_circ_0077237|hsa_circ_0077237|0|600	1	37
ENSG00000198736.11|mRNA|MSRB1|ENSG00000198736.11|ENSG00000198736.11|0|2157	1	69
ENSG00000204475.9|mRNA|NCR3|ENSG00000204475.9|ENSG00000204475.9|0|1212	1	54
hsa_circ_0089282|circRNA|hsa_circ_0089282|hsa_circ_0089282|hsa_circ_0089282|0|600	1	95
hsa_circ_0091092|circRNA|hsa_circ_0091092|hsa_circ_0091092|hsa_circ_0091092|0|600	1	66
ENSG00000198815.8|mRNA|FOXJ3|ENSG00000198815.8|ENSG00000198815.8|0|6893	1	65
hsa_circ_0081854|circRNA|hsa_circ_0081854|hsa_circ_0081854|hsa_circ_0081854|0|600	1	38
ENSG00000205918.9|pseudogene|PDPK2P|ENSG00000205918.9|ENSG00000205918.9|0|4426	1	48
ENSG00000198721.12|mRNA|ECI2|ENSG00000198721.12|ENSG00000198721.12|0|4579	1	82
hsa_circ_0075568|circRNA|hsa_circ_0075568|hsa_circ_0075568|hsa_circ_0075568|0|600	1	91
hsa_circ_0065140|circRNA|hsa_circ_0065140|hsa_circ_0065140|hsa_circ_0065140|0|600	1	84
ENSG00000205544.3|mRNA|TMEM256|ENSG00000205544.3|ENSG00000205544.3|0|707	1	99
hsa_circ_0082696|circRNA|hsa_circ_0082696|hsa_circ_0082696|hsa_circ_0082696|0|600	1	29
ENSG00000198586.13|mRNA|TLK1|ENSG00000198586.13|ENSG00000198586.13|0|9405	1	92
hsa_circ_0071101|circRNA|hsa_circ_0071101|hsa_circ_0071101|hsa_circ_0071101|0|600	1	13
ENSG00000205571.13|mRNA|SMN2|ENSG00000205571.13|ENSG00000205571.13|0|3011	1	93
hsa_circ_0085045|circRNA|hsa_circ_0085045|hsa_circ_0085045|hsa_circ_0085045|0|600	1	79
ENSG00000258782.3|lncRNA|AL121694.1|ENSG00000258782.3|ENSG00000258782.3|0|671	1	60
ENSG00000213799.11|mRNA|ZNF845|ENSG00000213799.11|ENSG00000213799.11|0|4413	1	74
ENSG00000251322.7|mRNA|SHANK3|ENSG00000251322.7|ENSG00000251322.7|0|7455	1	76
ENSG00000250101.1|lncRNA|AC106795.3|ENSG00000250101.1|ENSG00000250101.1|0|547	1	12
ENSG00000250299.5|pseudogene|MRPS31P4|ENSG00000250299.5|ENSG00000250299.5|0|1000	1	27
ENSG00000250334.5|lncRNA|LINC00989|ENSG00000250334.5|ENSG00000250334.5|0|2231	1	43
hsa_circ_0000027|circRNA|hsa_circ_0000027|hsa_circ_0000027|hsa_circ_0000027|0|600	1	83
ENSG00000250634.5|lncRNA|LINC01182|ENSG00000250634.5|ENSG00000250634.5|0|2742	1	6
ENSG00000250878.3|pseudogene|METTL21EP|ENSG00000250878.3|ENSG00000250878.3|0|2337	1	65
ENSG00000251259.1|lncRNA|AC004069.1|ENSG00000251259.1|ENSG00000251259.1|0|549	1	13
ENSG00000251399.1|lncRNA|AC092542.1|ENSG00000251399.1|ENSG00000251399.1|0|355	1	72
ENSG00000273784.4|lncRNA|AL137058.2|ENSG00000273784.4|ENSG00000273784.4|0|985	1	78
ENSG00000281903.2|lncRNA|LINC02246|ENSG00000281903.2|ENSG00000281903.2|0|3635	1	92
ENSG00000251595.7|pseudogene|ABCA11P|ENSG00000251595.7|ENSG00000251595.7|0|2790	1	49
ENSG00000253522.5|lncRNA|MIR3142HG|ENSG00000253522.5|ENSG00000253522.5|0|2301	1	80
ENSG00000279673.1|lncRNA|AC092919.2|ENSG00000279673.1|ENSG00000279673.1|0|1645	1	98
ENSG00000279605.1|lncRNA|AC067930.6|ENSG00000279605.1|ENSG00000279605.1|0|4947	1	74
ENSG00000277443.2|mRNA|MARCKS|ENSG00000277443.2|ENSG00000277443.2|0|4275	1	85
ENSG00000277108.1|snoRNA|SNORD49B|ENSG00000277108.1|ENSG00000277108.1|0|72	1	59
hsa_circ_0000118|circRNA|hsa_circ_0000118|hsa_circ_0000118|hsa_circ_0000118|0|600	1	26
hsa_circ_0000224|circRNA|hsa_circ_0000224|hsa_circ_0000224|hsa_circ_0000224|0|600	1	2
ENSG00000249684.5|lncRNA|AC106795.2|ENSG00000249684.5|ENSG00000249684.5|0|1421	1	6
ENSG00000249209.2|mRNA|AP000311.1|ENSG00000249209.2|ENSG00000249209.2|0|1078	1	98
ENSG00000248098.11|mRNA|BCKDHA|ENSG00000248098.11|ENSG00000248098.11|0|2602	1	39
hsa_circ_0003647|circRNA|hsa_circ_0003647|hsa_circ_0003647|hsa_circ_0003647|0|600	1	70
hsa_circ_0003541|circRNA|hsa_circ_0003541|hsa_circ_0003541|hsa_circ_0003541|0|600	1	62
hsa_circ_0003459|circRNA|hsa_circ_0003459|hsa_circ_0003459|hsa_circ_0003459|0|600	1	76
hsa_circ_0002333|circRNA|hsa_circ_0002333|hsa_circ_0002333|hsa_circ_0002333|0|494	1	75
hsa_circ_0002247|circRNA|hsa_circ_0002247|hsa_circ_0002247|hsa_circ_0002247|0|492	1	52
ENSG00000248242.1|lncRNA|AC004053.1|ENSG00000248242.1|ENSG00000248242.1|0|575	1	88
hsa_circ_0001949|circRNA|hsa_circ_0001949|hsa_circ_0001949|hsa_circ_0001949|0|438	1	87
hsa_circ_0001788|circRNA|hsa_circ_0001788|hsa_circ_0001788|hsa_circ_0001788|0|440	1	27
hsa_circ_0001769|circRNA|hsa_circ_0001769|hsa_circ_0001769|hsa_circ_0001769|0|600	1	31
hsa_circ_0001478|circRNA|hsa_circ_0001478|hsa_circ_0001478|hsa_circ_0001478|0|600	1	93
hsa_circ_0001187|circRNA|hsa_circ_0001187|hsa_circ_0001187|hsa_circ_0001187|0|600	1	71
hsa_circ_0001023|circRNA|hsa_circ_0001023|hsa_circ_0001023|hsa_circ_0001023|0|600	1	50
ENSG00000248636.6|lncRNA|AC002070.1|ENSG00000248636.6|ENSG00000248636.6|0|1013	1	26
hsa_circ_0000826|circRNA|hsa_circ_0000826|hsa_circ_0000826|hsa_circ_0000826|0|600	1	66
ENSG00000254659.2|lncRNA|AP002444.1|ENSG00000254659.2|ENSG00000254659.2|0|620	1	91
ENSG00000254681.6|pseudogene|PKD1P5|ENSG00000254681.6|ENSG00000254681.6|0|10291	1	48
ENSG00000244005.12|mRNA|NFS1|ENSG00000244005.12|ENSG00000244005.12|0|6024	1	73
ENSG00000260238.6|mRNA|PMF1-BGLAP|ENSG00000260238.6|ENSG00000260238.6|0|1007	1	34
ENSG00000257218.5|mRNA|GATC|ENSG00000257218.5|ENSG00000257218.5|0|4422	1	84
ENSG00000261864.1|lncRNA|AC130462.1|ENSG00000261864.1|ENSG00000261864.1|0|549	1	2
ENSG00000260643.2|mRNA|AC092718.3|ENSG00000260643.2|ENSG00000260643.2|0|3177	1	94
ENSG00000257337.6|lncRNA|AC068888.1|ENSG00000257337.6|ENSG00000257337.6|0|5622	1	48
ENSG00000257411.1|mRNA|AC034102.2|ENSG00000257411.1|ENSG00000257411.1|0|489	1	46
ENSG00000257529.5|mRNA|RPL36A-HNRNPH2|ENSG00000257529.5|ENSG00000257529.5|0|695	1	56
ENSG00000260314.2|mRNA|MRC1|ENSG00000260314.2|ENSG00000260314.2|0|5198	1	62
ENSG00000259781.1|pseudogene|HMGB1P6|ENSG00000259781.1|ENSG00000259781.1|0|646	1	50
ENSG00000273117.1|lncRNA|AC144652.1|ENSG00000273117.1|ENSG00000273117.1|0|1624	1	83
ENSG00000259522.3|mRNA|AL136295.4|ENSG00000259522.3|ENSG00000259522.3|0|4351	1	8
ENSG00000258539.1|mRNA|AC068896.1|ENSG00000258539.1|ENSG00000258539.1|0|3422	1	61
ENSG00000259316.10|mRNA|AC087632.1|ENSG00000259316.10|ENSG00000259316.10|0|3357	1	97
ENSG00000258588.3|mRNA|TRIM6-TRIM34|ENSG00000258588.3|ENSG00000258588.3|0|3391	1	51
ENSG00000258659.6|mRNA|TRIM34|ENSG00000258659.6|ENSG00000258659.6|0|2690	1	30
ENSG00000259115.1|lncRNA|AL357153.3|ENSG00000259115.1|ENSG00000259115.1|0|611	1	17
ENSG00000258724.1|mRNA|AC105001.2|ENSG00000258724.1|ENSG00000258724.1|0|1753	1	84
ENSG00000262481.5|mRNA|TMEM256-PLSCR3|ENSG00000262481.5|ENSG00000262481.5|0|2557	1	64
ENSG00000262526.2|mRNA|AC120057.3|ENSG00000262526.2|ENSG00000262526.2|0|776	1	84
ENSG00000262814.7|mRNA|MRPL12|ENSG00000262814.7|ENSG00000262814.7|0|1028	1	21
ENSG00000263809.1|mRNA|AC135178.2|ENSG00000263809.1|ENSG00000263809.1|0|3087	1	83
ENSG00000254887.1|lncRNA|AC010247.1|ENSG00000254887.1|ENSG00000254887.1|0|897	1	48
ENSG00000271853.5|lncRNA|AL162258.1|ENSG00000271853.5|ENSG00000271853.5|0|995	1	77
ENSG00000270316.1|mRNA|BORCS7-ASMT|ENSG00000270316.1|ENSG00000270316.1|0|2670	1	74
ENSG00000269968.1|lncRNA|AC006064.4|ENSG00000269968.1|ENSG00000269968.1|0|422	1	93
ENSG00000269556.7|mRNA|TMEM185A|ENSG00000269556.7|ENSG00000269556.7|0|5158	1	27
ENSG00000268573.1|lncRNA|AC011815.1|ENSG00000268573.1|ENSG00000268573.1|0|4382	1	83
ENSG00000268400.5|mRNA|AC008763.2|ENSG00000268400.5|ENSG00000268400.5|0|1366	1	28
ENSG00000255339.6|mRNA|AL133352.1|ENSG00000255339.6|ENSG00000255339.6|0|2139	1	14
ENSG00000267748.4|mRNA|AC011479.1|ENSG00000267748.4|ENSG00000267748.4|0|546	1	19
ENSG00000255639.2|mRNA|AC005833.3|ENSG00000255639.2|ENSG00000255639.2|0|1186	1	41
ENSG00000266412.5|mRNA|NCOA4|ENSG00000266412.5|ENSG00000266412.5|0|4079	1	97
ENSG00000266173.6|mRNA|STRADA|ENSG00000266173.6|ENSG00000266173.6|0|10860	1	69
ENSG00000266094.7|mRNA|RASSF5|ENSG00000266094.7|ENSG00000266094.7|0|6976	1	98
ENSG00000265399.1|lncRNA|AP005329.2|ENSG00000265399.1|ENSG00000265399.1|0|1771	1	21
ENSG00000264707.1|lncRNA|L3MBTL4-AS1|ENSG00000264707.1|ENSG00000264707.1|0|2044	1	86
hsa_circ_0003930|circRNA|hsa_circ_0003930|hsa_circ_0003930|hsa_circ_0003930|0|600	1	24
hsa_circ_0005085|circRNA|hsa_circ_0005085|hsa_circ_0005085|hsa_circ_0005085|0|438	1	90
ENSG00000214026.10|mRNA|MRPL23|ENSG00000214026.10|ENSG00000214026.10|0|2975	1	50
hsa_circ_0030572|circRNA|hsa_circ_0030572|hsa_circ_0030572|hsa_circ_0030572|0|600	1	80
ENSG00000215375.6|mRNA|MYL5|ENSG00000215375.6|ENSG00000215375.6|0|4305	1	55
hsa_circ_0031762|circRNA|hsa_circ_0031762|hsa_circ_0031762|hsa_circ_0031762|0|600	1	46
ENSG00000217930.7|mRNA|PAM16|ENSG00000217930.7|ENSG00000217930.7|0|2383	1	87
hsa_circ_0031571|circRNA|hsa_circ_0031571|hsa_circ_0031571|hsa_circ_0031571|0|600	1	25
hsa_circ_0031470|circRNA|hsa_circ_0031470|hsa_circ_0031470|hsa_circ_0031470|0|560	1	37
ENSG00000219200.11|mRNA|RNASEK|ENSG00000219200.11|ENSG00000219200.11|0|1789	1	70
hsa_circ_0030819|circRNA|hsa_circ_0030819|hsa_circ_0030819|hsa_circ_0030819|0|600	1	8
ENSG00000221983.7|mRNA|UBA52|ENSG00000221983.7|ENSG00000221983.7|0|4306	1	81
ENSG00000225190.10|mRNA|PLEKHM1|ENSG00000225190.10|ENSG00000225190.10|0|9233	1	39
hsa_circ_0029638|circRNA|hsa_circ_0029638|hsa_circ_0029638|hsa_circ_0029638|0|600	1	18
hsa_circ_0027586|circRNA|hsa_circ_0027586|hsa_circ_0027586|hsa_circ_0027586|0|600	1	39
ENSG00000223553.6|pseudogene|SMPD4P1|ENSG00000223553.6|ENSG00000223553.6|0|3971	1	39
hsa_circ_0027033|circRNA|hsa_circ_0027033|hsa_circ_0027033|hsa_circ_0027033|0|600	1	82
hsa_circ_0026053|circRNA|hsa_circ_0026053|hsa_circ_0026053|hsa_circ_0026053|0|600	1	76
hsa_circ_0025939|circRNA|hsa_circ_0025939|hsa_circ_0025939|hsa_circ_0025939|0|600	1	63
ENSG00000224897.6|lncRNA|POT1-AS1|ENSG00000224897.6|ENSG00000224897.6|0|6304	1	23
ENSG00000215277.8|mRNA|RNF212B|ENSG00000215277.8|ENSG00000215277.8|0|2059	1	21
hsa_circ_0032109|circRNA|hsa_circ_0032109|hsa_circ_0032109|hsa_circ_0032109|0|600	1	30
hsa_circ_0032261|circRNA|hsa_circ_0032261|hsa_circ_0032261|hsa_circ_0032261|0|600	1	24
hsa_circ_0032326|circRNA|hsa_circ_0032326|hsa_circ_0032326|hsa_circ_0032326|0|600	1	45
hsa_circ_0047922|circRNA|hsa_circ_0047922|hsa_circ_0047922|hsa_circ_0047922|0|600	1	7
hsa_circ_0047159|circRNA|hsa_circ_0047159|hsa_circ_0047159|hsa_circ_0047159|0|600	1	37
hsa_circ_0042967|circRNA|hsa_circ_0042967|hsa_circ_0042967|hsa_circ_0042967|0|600	1	80
hsa_circ_0042517|circRNA|hsa_circ_0042517|hsa_circ_0042517|hsa_circ_0042517|0|600	1	56
ENSG00000214087.8|mRNA|ARL16|ENSG00000214087.8|ENSG00000214087.8|0|2597	1	41
hsa_circ_0042093|circRNA|hsa_circ_0042093|hsa_circ_0042093|hsa_circ_0042093|0|600	1	41
hsa_circ_0039365|circRNA|hsa_circ_0039365|hsa_circ_0039365|hsa_circ_0039365|0|600	1	46
hsa_circ_0037010|circRNA|hsa_circ_0037010|hsa_circ_0037010|hsa_circ_0037010|0|600	1	4
hsa_circ_0035952|circRNA|hsa_circ_0035952|hsa_circ_0035952|hsa_circ_0035952|0|600	1	50
hsa_circ_0035052|circRNA|hsa_circ_0035052|hsa_circ_0035052|hsa_circ_0035052|0|600	1	80
hsa_circ_0034822|circRNA|hsa_circ_0034822|hsa_circ_0034822|hsa_circ_0034822|0|560	1	55
hsa_circ_0034517|circRNA|hsa_circ_0034517|hsa_circ_0034517|hsa_circ_0034517|0|600	1	43
ENSG00000214530.8|mRNA|STARD10|ENSG00000214530.8|ENSG00000214530.8|0|4197	1	7
ENSG00000214706.10|mRNA|IFRD2|ENSG00000214706.10|ENSG00000214706.10|0|3712	1	53
hsa_circ_0032959|circRNA|hsa_circ_0032959|hsa_circ_0032959|hsa_circ_0032959|0|286	1	46
hsa_circ_0023065|circRNA|hsa_circ_0023065|hsa_circ_0023065|hsa_circ_0023065|0|600	1	34
ENSG00000225231.1|lncRNA|LINC02470|ENSG00000225231.1|ENSG00000225231.1|0|979	1	28
hsa_circ_0005348|circRNA|hsa_circ_0005348|hsa_circ_0005348|hsa_circ_0005348|0|600	1	59
ENSG00000239697.10|mRNA|TNFSF12|ENSG00000239697.10|ENSG00000239697.10|0|1879	1	17
hsa_circ_0007765|circRNA|hsa_circ_0007765|hsa_circ_0007765|hsa_circ_0007765|0|600	1	97
hsa_circ_0007123|circRNA|hsa_circ_0007123|hsa_circ_0007123|hsa_circ_0007123|0|600	1	49
ENSG00000237973.1|pseudogene|MTCO1P12|ENSG00000237973.1|ENSG00000237973.1|0|1543	1	33
ENSG00000238083.7|mRNA|LRRC37A2|ENSG00000238083.7|ENSG00000238083.7|0|6756	1	91
ENSG00000239672.7|mRNA|NME1|ENSG00000239672.7|ENSG00000239672.7|0|3438	1	96
hsa_circ_0006956|circRNA|hsa_circ_0006956|hsa_circ_0006956|hsa_circ_0006956|0|508	1	58
hsa_circ_0006732|circRNA|hsa_circ_0006732|hsa_circ_0006732|hsa_circ_0006732|0|504	1	18
hsa_circ_0006518|circRNA|hsa_circ_0006518|hsa_circ_0006518|hsa_circ_0006518|0|518	1	79
ENSG00000225484.6|lncRNA|NUTM2B-AS1|ENSG00000225484.6|ENSG00000225484.6|0|14755	1	14
hsa_circ_0006373|circRNA|hsa_circ_0006373|hsa_circ_0006373|hsa_circ_0006373|0|600	1	14
hsa_circ_0006089|circRNA|hsa_circ_0006089|hsa_circ_0006089|hsa_circ_0006089|0|600	1	45
ENSG00000241945.7|mRNA|PWP2|ENSG00000241945.7|ENSG00000241945.7|0|6922	1	97
hsa_circ_0005729|circRNA|hsa_circ_0005729|hsa_circ_0005729|hsa_circ_0005729|0|564	1	86
ENSG00000242485.5|mRNA|MRPL20|ENSG00000242485.5|ENSG00000242485.5|0|2788	1	53
hsa_circ_0005471|circRNA|hsa_circ_0005471|hsa_circ_0005471|hsa_circ_0005471|0|600	1	87
ENSG00000242802.6|mRNA|AP5Z1|ENSG00000242802.6|ENSG00000242802.6|0|6873	1	92
ENSG00000235513.1|lncRNA|AL035681.1|ENSG00000235513.1|ENSG00000235513.1|0|2500	1	6
hsa_circ_0007874|circRNA|hsa_circ_0007874|hsa_circ_0007874|hsa_circ_0007874|0|600	1	45
ENSG00000234741.7|lncRNA|GAS5|ENSG00000234741.7|ENSG00000234741.7|0|3631	1	97
ENSG00000233554.5|lncRNA|B4GALT1-AS1|ENSG00000233554.5|ENSG00000233554.5|0|843	1	49
hsa_circ_0022189|circRNA|hsa_circ_0022189|hsa_circ_0022189|hsa_circ_0022189|0|600	1	23
ENSG00000225506.2|lncRNA|CYP4A22-AS1|ENSG00000225506.2|ENSG00000225506.2|0|921	1	38
hsa_circ_0019296|circRNA|hsa_circ_0019296|hsa_circ_0019296|hsa_circ_0019296|0|600	1	23
hsa_circ_0017985|circRNA|hsa_circ_0017985|hsa_circ_0017985|hsa_circ_0017985|0|598	1	40
ENSG00000227355.2|lncRNA|AL359644.1|ENSG00000227355.2|ENSG00000227355.2|0|1671	1	61
ENSG00000228215.2|lncRNA|AL954650.1|ENSG00000228215.2|ENSG00000228215.2|0|2051	1	95
hsa_circ_0013252|circRNA|hsa_circ_0013252|hsa_circ_0013252|hsa_circ_0013252|0|600	1	93
ENSG00000231312.6|lncRNA|AC007388.1|ENSG00000231312.6|ENSG00000231312.6|0|6741	1	22
hsa_circ_0009541|circRNA|hsa_circ_0009541|hsa_circ_0009541|hsa_circ_0009541|0|378	1	83
hsa_circ_0009158|circRNA|hsa_circ_0009158|hsa_circ_0009158|hsa_circ_0009158|0|600	1	56
ENSG00000231652.2|lncRNA|AL590428.1|ENSG00000231652.2|ENSG00000231652.2|0|1973	1	9
hsa_circ_0009131|circRNA|hsa_circ_0009131|hsa_circ_0009131|hsa_circ_0009131|0|600	1	52
hsa_circ_0008841|circRNA|hsa_circ_0008841|hsa_circ_0008841|hsa_circ_0008841|0|600	1	25
hsa_circ_0008432|circRNA|hsa_circ_0008432|hsa_circ_0008432|hsa_circ_0008432|0|504	1	80
hsa_circ_0008311|circRNA|hsa_circ_0008311|hsa_circ_0008311|hsa_circ_0008311|0|594	1	18
ENSG00000198242.13|mRNA|RPL23A|ENSG00000198242.13|ENSG00000198242.13|0|2824	1	57
ENSG00000160179.18|mRNA|ABCG1|ENSG00000160179.18|ENSG00000160179.18|0|6121	1	39
ENSG00000198093.10|mRNA|ZNF649|ENSG00000198093.10|ENSG00000198093.10|0|4365	1	11
ENSG00000118197.13|mRNA|DDX59|ENSG00000118197.13|ENSG00000118197.13|0|4470	1	43
ENSG00000115694.14|mRNA|STK25|ENSG00000115694.14|ENSG00000115694.14|0|7584	1	14
ENSG00000115946.7|mRNA|PNO1|ENSG00000115946.7|ENSG00000115946.7|0|2674	1	69
ENSG00000116001.15|mRNA|TIA1|ENSG00000116001.15|ENSG00000116001.15|0|6607	1	59
ENSG00000116514.16|mRNA|RNF19B|ENSG00000116514.16|ENSG00000116514.16|0|2610	1	33
ENSG00000117054.13|mRNA|ACADM|ENSG00000117054.13|ENSG00000117054.13|0|4783	1	96
ENSG00000117360.12|mRNA|PRPF3|ENSG00000117360.12|ENSG00000117360.12|0|5373	1	64
ENSG00000117448.13|mRNA|AKR1A1|ENSG00000117448.13|ENSG00000117448.13|0|3121	1	33
ENSG00000117450.13|mRNA|PRDX1|ENSG00000117450.13|ENSG00000117450.13|0|1522	1	87
ENSG00000117519.15|mRNA|CNN3|ENSG00000117519.15|ENSG00000117519.15|0|2838	1	88
ENSG00000117533.14|mRNA|VAMP4|ENSG00000117533.14|ENSG00000117533.14|0|5159	1	27
ENSG00000118046.14|mRNA|STK11|ENSG00000118046.14|ENSG00000118046.14|0|8639	1	47
ENSG00000118113.11|mRNA|MMP8|ENSG00000118113.11|ENSG00000118113.11|0|3438	1	34
ENSG00000118777.10|mRNA|ABCG2|ENSG00000118777.10|ENSG00000118777.10|0|4848	1	39
ENSG00000120709.10|mRNA|FAM53C|ENSG00000120709.10|ENSG00000120709.10|0|7051	1	30
ENSG00000118971.7|mRNA|CCND2|ENSG00000118971.7|ENSG00000118971.7|0|7157	1	1
ENSG00000118997.13|mRNA|DNAH7|ENSG00000118997.13|ENSG00000118997.13|0|21324	1	30
ENSG00000119185.12|mRNA|ITGB1BP1|ENSG00000119185.12|ENSG00000119185.12|0|6678	1	29
ENSG00000119421.6|mRNA|NDUFA8|ENSG00000119421.6|ENSG00000119421.6|0|844	1	50
ENSG00000119723.16|mRNA|COQ6|ENSG00000119723.16|ENSG00000119723.16|0|6686	1	58
ENSG00000119778.14|mRNA|ATAD2B|ENSG00000119778.14|ENSG00000119778.14|0|10492	1	62
ENSG00000120053.10|mRNA|GOT1|ENSG00000120053.10|ENSG00000120053.10|0|2424	1	69
ENSG00000120159.11|mRNA|CAAP1|ENSG00000120159.11|ENSG00000120159.11|0|3014	1	40
ENSG00000120306.9|mRNA|CYSTM1|ENSG00000120306.9|ENSG00000120306.9|0|2185	1	94
ENSG00000120318.15|mRNA|ARAP3|ENSG00000120318.15|ENSG00000120318.15|0|6186	1	60
ENSG00000120437.8|mRNA|ACAT2|ENSG00000120437.8|ENSG00000120437.8|0|4299	1	94
ENSG00000120438.11|mRNA|TCP1|ENSG00000120438.11|ENSG00000120438.11|0|4929	1	99
ENSG00000115661.13|mRNA|STK16|ENSG00000115661.13|ENSG00000115661.13|0|4368	1	24
ENSG00000115652.14|mRNA|UXS1|ENSG00000115652.14|ENSG00000115652.14|0|7023	1	99
ENSG00000115484.14|mRNA|CCT4|ENSG00000115484.14|ENSG00000115484.14|0|2830	1	73
ENSG00000115459.17|mRNA|ELMOD3|ENSG00000115459.17|ENSG00000115459.17|0|7259	1	41
ENSG00000110013.12|mRNA|SIAE|ENSG00000110013.12|ENSG00000110013.12|0|8139	1	81
ENSG00000110090.12|mRNA|CPT1A|ENSG00000110090.12|ENSG00000110090.12|0|6565	1	25
ENSG00000110092.3|mRNA|CCND1|ENSG00000110092.3|ENSG00000110092.3|0|4830	1	44
ENSG00000110536.13|mRNA|PTPMT1|ENSG00000110536.13|ENSG00000110536.13|0|2740	1	95
ENSG00000111321.10|mRNA|LTBR|ENSG00000111321.10|ENSG00000111321.10|0|6280	1	9
ENSG00000111335.12|mRNA|OAS2|ENSG00000111335.12|ENSG00000111335.12|0|6264	1	16
ENSG00000111725.10|mRNA|PRKAB1|ENSG00000111725.10|ENSG00000111725.10|0|6246	1	94
ENSG00000112031.15|mRNA|MTRF1L|ENSG00000112031.15|ENSG00000112031.15|0|4273	1	37
ENSG00000112077.15|mRNA|RHAG|ENSG00000112077.15|ENSG00000112077.15|0|1912	1	33
ENSG00000112079.8|mRNA|STK38|ENSG00000112079.8|ENSG00000112079.8|0|3576	1	62
ENSG00000112144.15|mRNA|ICK|ENSG00000112144.15|ENSG00000112144.15|0|6259	1	79
ENSG00000112245.10|mRNA|PTP4A1|ENSG00000112245.10|ENSG00000112245.10|0|5996	1	87
ENSG00000112511.17|mRNA|PHF1|ENSG00000112511.17|ENSG00000112511.17|0|3596	1	42
ENSG00000112584.13|mRNA|FAM120B|ENSG00000112584.13|ENSG00000112584.13|0|6029	1	80
ENSG00000112695.11|mRNA|COX7A2|ENSG00000112695.11|ENSG00000112695.11|0|1922	1	83
ENSG00000112699.10|mRNA|GMDS|ENSG00000112699.10|ENSG00000112699.10|0|4304	1	88
ENSG00000112773.15|mRNA|FAM46A|ENSG00000112773.15|ENSG00000112773.15|0|6053	1	28
ENSG00000113319.12|mRNA|RASGRF2|ENSG00000113319.12|ENSG00000113319.12|0|10717	1	40
ENSG00000113657.12|mRNA|DPYSL3|ENSG00000113657.12|ENSG00000113657.12|0|7164	1	34
ENSG00000113716.12|mRNA|HMGXB3|ENSG00000113716.12|ENSG00000113716.12|0|6263	1	99
ENSG00000114209.14|mRNA|PDCD10|ENSG00000114209.14|ENSG00000114209.14|0|3275	1	88
ENSG00000114268.11|mRNA|PFKFB4|ENSG00000114268.11|ENSG00000114268.11|0|6107	1	70
ENSG00000114686.8|mRNA|MRPL3|ENSG00000114686.8|ENSG00000114686.8|0|2715	1	41
ENSG00000115364.13|mRNA|MRPL19|ENSG00000115364.13|ENSG00000115364.13|0|4601	1	97
ENSG00000115414.18|mRNA|FN1|ENSG00000115414.18|ENSG00000115414.18|0|17315	1	2
ENSG00000120594.16|mRNA|PLXDC2|ENSG00000120594.16|ENSG00000120594.16|0|12567	1	92
ENSG00000121101.15|mRNA|TEX14|ENSG00000121101.15|ENSG00000121101.15|0|5325	1	93
ENSG00000134809.8|mRNA|TIMM10|ENSG00000134809.8|ENSG00000134809.8|0|777	1	41
ENSG00000131778.18|mRNA|CHD1L|ENSG00000131778.18|ENSG00000131778.18|0|3376	1	74
ENSG00000129255.15|mRNA|MPDU1|ENSG00000129255.15|ENSG00000129255.15|0|3270	1	64
ENSG00000129515.18|mRNA|SNX6|ENSG00000129515.18|ENSG00000129515.18|0|4105	1	93
ENSG00000130208.9|mRNA|APOC1|ENSG00000130208.9|ENSG00000130208.9|0|1231	1	94
ENSG00000130305.16|mRNA|NSUN5|ENSG00000130305.16|ENSG00000130305.16|0|3414	1	86
ENSG00000130309.10|mRNA|COLGALT1|ENSG00000130309.10|ENSG00000130309.10|0|4900	1	28
ENSG00000130511.15|mRNA|SSBP4|ENSG00000130511.15|ENSG00000130511.15|0|2974	1	60
ENSG00000130598.15|mRNA|TNNI2|ENSG00000130598.15|ENSG00000130598.15|0|1082	1	37
ENSG00000130669.17|mRNA|PAK4|ENSG00000130669.17|ENSG00000130669.17|0|7115	1	77
ENSG00000130741.10|mRNA|EIF2S3|ENSG00000130741.10|ENSG00000130741.10|0|3472	1	46
ENSG00000130803.14|mRNA|ZNF317|ENSG00000130803.14|ENSG00000130803.14|0|5065	1	26
ENSG00000131469.12|mRNA|RPL27|ENSG00000131469.12|ENSG00000131469.12|0|2026	1	90
ENSG00000131507.10|mRNA|NDFIP1|ENSG00000131507.10|ENSG00000131507.10|0|6024	1	26
ENSG00000131981.15|mRNA|LGALS3|ENSG00000131981.15|ENSG00000131981.15|0|2397	1	86
ENSG00000121879.3|mRNA|PIK3CA|ENSG00000121879.3|ENSG00000121879.3|0|9411	1	63
ENSG00000132275.10|mRNA|RRP8|ENSG00000132275.10|ENSG00000132275.10|0|6922	1	52
ENSG00000132361.16|mRNA|CLUH|ENSG00000132361.16|ENSG00000132361.16|0|6900	1	65
ENSG00000132470.13|mRNA|ITGB4|ENSG00000132470.13|ENSG00000132470.13|0|6761	1	84
ENSG00000132514.13|mRNA|CLEC10A|ENSG00000132514.13|ENSG00000132514.13|0|2469	1	65
ENSG00000132664.11|mRNA|POLR3F|ENSG00000132664.11|ENSG00000132664.11|0|2928	1	6
ENSG00000132824.13|mRNA|SERINC3|ENSG00000132824.13|ENSG00000132824.13|0|4683	1	86
ENSG00000133112.16|mRNA|TPT1|ENSG00000133112.16|ENSG00000133112.16|0|7269	1	97
ENSG00000133895.14|mRNA|MEN1|ENSG00000133895.14|ENSG00000133895.14|0|4246	1	86
ENSG00000133997.11|mRNA|MED6|ENSG00000133997.11|ENSG00000133997.11|0|4219	1	65
ENSG00000134313.15|mRNA|KIDINS220|ENSG00000134313.15|ENSG00000134313.15|0|15362	1	67
ENSG00000134548.9|mRNA|SPX|ENSG00000134548.9|ENSG00000134548.9|0|3359	1	55
ENSG00000134602.15|mRNA|STK26|ENSG00000134602.15|ENSG00000134602.15|0|3354	1	91
ENSG00000129250.11|mRNA|KIF1C|ENSG00000129250.11|ENSG00000129250.11|0|8580	1	87
ENSG00000129235.10|mRNA|TXNDC17|ENSG00000129235.10|ENSG00000129235.10|0|3784	1	83
ENSG00000129128.12|mRNA|SPCS3|ENSG00000129128.12|ENSG00000129128.12|0|6831	1	44
ENSG00000128791.11|mRNA|TWSG1|ENSG00000128791.11|ENSG00000128791.11|0|4435	1	76
ENSG00000122034.14|mRNA|GTF3A|ENSG00000122034.14|ENSG00000122034.14|0|3001	1	79
ENSG00000122299.11|mRNA|ZC3H7A|ENSG00000122299.11|ENSG00000122299.11|0|7076	1	97
ENSG00000122970.15|mRNA|IFT81|ENSG00000122970.15|ENSG00000122970.15|0|7005	1	54
ENSG00000122971.8|mRNA|ACADS|ENSG00000122971.8|ENSG00000122971.8|0|2648	1	36
ENSG00000123130.16|mRNA|ACOT9|ENSG00000123130.16|ENSG00000123130.16|0|5046	1	87
ENSG00000123179.13|mRNA|EBPL|ENSG00000123179.13|ENSG00000123179.13|0|1500	1	20
ENSG00000123268.8|mRNA|ATF1|ENSG00000123268.8|ENSG00000123268.8|0|2790	1	10
ENSG00000123349.13|mRNA|PFDN5|ENSG00000123349.13|ENSG00000123349.13|0|3380	1	98
ENSG00000123500.9|mRNA|COL10A1|ENSG00000123500.9|ENSG00000123500.9|0|3816	1	95
ENSG00000123595.7|mRNA|RAB9A|ENSG00000123595.7|ENSG00000123595.7|0|2118	1	58
ENSG00000124208.16|mRNA|TMEM189-UBE2V1|ENSG00000124208.16|ENSG00000124208.16|0|2757	1	33
ENSG00000124256.14|mRNA|ZBP1|ENSG00000124256.14|ENSG00000124256.14|0|5405	1	76
ENSG00000125247.15|mRNA|TMTC4|ENSG00000125247.15|ENSG00000125247.15|0|6272	1	32
ENSG00000125347.13|mRNA|IRF1|ENSG00000125347.13|ENSG00000125347.13|0|7799	1	52
ENSG00000125652.7|mRNA|ALKBH7|ENSG00000125652.7|ENSG00000125652.7|0|1455	1	33
ENSG00000125835.18|mRNA|SNRPB|ENSG00000125835.18|ENSG00000125835.18|0|1278	1	49
ENSG00000125971.16|mRNA|DYNLRB1|ENSG00000125971.16|ENSG00000125971.16|0|2460	1	94
ENSG00000126457.21|mRNA|PRMT1|ENSG00000126457.21|ENSG00000126457.21|0|4796	1	69
ENSG00000127084.17|mRNA|FGD3|ENSG00000127084.17|ENSG00000127084.17|0|5890	1	84
ENSG00000127325.18|mRNA|BEST3|ENSG00000127325.18|ENSG00000127325.18|0|6863	1	85
ENSG00000127329.15|mRNA|PTPRB|ENSG00000127329.15|ENSG00000127329.15|0|14542	1	50
ENSG00000127804.12|mRNA|METTL16|ENSG00000127804.12|ENSG00000127804.12|0|8934	1	82
ENSG00000127920.5|mRNA|GNG11|ENSG00000127920.5|ENSG00000127920.5|0|3055	1	62
ENSG00000127951.6|mRNA|FGL2|ENSG00000127951.6|ENSG00000127951.6|0|4604	1	39
ENSG00000128016.5|mRNA|ZFP36|ENSG00000128016.5|ENSG00000128016.5|0|2010	1	42
ENSG00000109917.10|mRNA|ZPR1|ENSG00000109917.10|ENSG00000109917.10|0|7069	1	60
ENSG00000109519.12|mRNA|GRPEL1|ENSG00000109519.12|ENSG00000109519.12|0|4177	1	45
ENSG00000109320.11|mRNA|NFKB1|ENSG00000109320.11|ENSG00000109320.11|0|6257	1	45
ENSG00000068366.19|mRNA|ACSL4|ENSG00000068366.19|ENSG00000068366.19|0|6415	1	74
ENSG00000049860.13|mRNA|HEXB|ENSG00000049860.13|ENSG00000049860.13|0|5067	1	9
ENSG00000050393.11|mRNA|MCUR1|ENSG00000050393.11|ENSG00000050393.11|0|6057	1	82
ENSG00000051825.14|mRNA|MPHOSPH9|ENSG00000051825.14|ENSG00000051825.14|0|10304	1	65
ENSG00000053372.4|mRNA|MRTO4|ENSG00000053372.4|ENSG00000053372.4|0|2822	1	69
ENSG00000053918.15|mRNA|KCNQ1|ENSG00000053918.15|ENSG00000053918.15|0|3971	1	63
ENSG00000056586.15|mRNA|RC3H2|ENSG00000056586.15|ENSG00000056586.15|0|11545	1	73
ENSG00000058729.10|mRNA|RIOK2|ENSG00000058729.10|ENSG00000058729.10|0|5502	1	92
ENSG00000063169.10|mRNA|BICRA|ENSG00000063169.10|ENSG00000063169.10|0|7507	1	17
ENSG00000065135.10|mRNA|GNAI3|ENSG00000065135.10|ENSG00000065135.10|0|27174	1	78
ENSG00000065183.15|mRNA|WDR3|ENSG00000065183.15|ENSG00000065183.15|0|10275	1	26
ENSG00000066117.14|mRNA|SMARCD1|ENSG00000066117.14|ENSG00000066117.14|0|5136	1	63
ENSG00000068097.14|mRNA|HEATR6|ENSG00000068097.14|ENSG00000068097.14|0|4868	1	92
ENSG00000069966.18|mRNA|GNB5|ENSG00000069966.18|ENSG00000069966.18|0|13302	1	82
ENSG00000108679.12|mRNA|LGALS3BP|ENSG00000108679.12|ENSG00000108679.12|0|3584	1	94
ENSG00000070495.14|mRNA|JMJD6|ENSG00000070495.14|ENSG00000070495.14|0|5969	1	64
ENSG00000071073.12|mRNA|MGAT4A|ENSG00000071073.12|ENSG00000071073.12|0|9630	1	16
ENSG00000071242.11|mRNA|RPS6KA2|ENSG00000071242.11|ENSG00000071242.11|0|8243	1	57
ENSG00000071967.11|mRNA|CYBRD1|ENSG00000071967.11|ENSG00000071967.11|0|5176	1	34
ENSG00000072210.18|mRNA|ALDH3A2|ENSG00000072210.18|ENSG00000072210.18|0|6457	1	96
ENSG00000072274.12|mRNA|TFRC|ENSG00000072274.12|ENSG00000072274.12|0|7887	1	49
ENSG00000073331.17|mRNA|ALPK1|ENSG00000073331.17|ENSG00000073331.17|0|12325	1	63
ENSG00000075336.11|mRNA|TIMM21|ENSG00000075336.11|ENSG00000075336.11|0|5208	1	61
ENSG00000075711.20|mRNA|DLG1|ENSG00000075711.20|ENSG00000075711.20|0|11001	1	39
ENSG00000076321.10|mRNA|KLHL20|ENSG00000076321.10|ENSG00000076321.10|0|4254	1	89
ENSG00000077157.21|mRNA|PPP1R12B|ENSG00000077157.21|ENSG00000077157.21|0|21069	1	52
ENSG00000077684.15|mRNA|JADE1|ENSG00000077684.15|ENSG00000077684.15|0|9129	1	85
ENSG00000049089.13|mRNA|COL9A2|ENSG00000049089.13|ENSG00000049089.13|0|4151	1	53
ENSG00000048392.11|mRNA|RRM2B|ENSG00000048392.11|ENSG00000048392.11|0|5548	1	25
ENSG00000048162.20|mRNA|NOP16|ENSG00000048162.20|ENSG00000048162.20|0|2862	1	98
ENSG00000044574.7|mRNA|HSPA5|ENSG00000044574.7|ENSG00000044574.7|0|3908	1	19
ENSG00000005448.16|mRNA|WDR54|ENSG00000005448.16|ENSG00000005448.16|0|2860	1	95
ENSG00000006530.15|mRNA|AGK|ENSG00000006530.15|ENSG00000006530.15|0|6547	1	99
ENSG00000006534.15|mRNA|ALDH3B1|ENSG00000006534.15|ENSG00000006534.15|0|6626	1	36
ENSG00000007255.10|mRNA|TRAPPC6A|ENSG00000007255.10|ENSG00000007255.10|0|933	1	86
ENSG00000010539.11|mRNA|ZNF200|ENSG00000010539.11|ENSG00000010539.11|0|7498	1	47
ENSG00000010610.9|mRNA|CD4|ENSG00000010610.9|ENSG00000010610.9|0|4583	1	72
ENSG00000010803.16|mRNA|SCMH1|ENSG00000010803.16|ENSG00000010803.16|0|4447	1	80
ENSG00000011132.11|mRNA|APBA3|ENSG00000011132.11|ENSG00000011132.11|0|5556	1	76
ENSG00000011485.14|mRNA|PPP5C|ENSG00000011485.14|ENSG00000011485.14|0|7059	1	65
ENSG00000012983.11|mRNA|MAP4K5|ENSG00000012983.11|ENSG00000012983.11|0|7620	1	99
ENSG00000014164.6|mRNA|ZC3H3|ENSG00000014164.6|ENSG00000014164.6|0|3731	1	67
ENSG00000020577.13|mRNA|SAMD4A|ENSG00000020577.13|ENSG00000020577.13|0|12170	1	44
ENSG00000025156.12|mRNA|HSF2|ENSG00000025156.12|ENSG00000025156.12|0|2702	1	39
ENSG00000026036.21|mRNA|RTEL1-TNFRSF6B|ENSG00000026036.21|ENSG00000026036.21|0|8738	1	88
ENSG00000028137.18|mRNA|TNFRSF1B|ENSG00000028137.18|ENSG00000028137.18|0|3766	1	43
ENSG00000028839.9|mRNA|TBPL1|ENSG00000028839.9|ENSG00000028839.9|0|5039	1	24
ENSG00000030419.16|mRNA|IKZF2|ENSG00000030419.16|ENSG00000030419.16|0|12240	1	63
ENSG00000032389.12|mRNA|EIPR1|ENSG00000032389.12|ENSG00000032389.12|0|5775	1	26
ENSG00000033030.13|mRNA|ZCCHC8|ENSG00000033030.13|ENSG00000033030.13|0|9124	1	54
ENSG00000033050.7|mRNA|ABCF2|ENSG00000033050.7|ENSG00000033050.7|0|4448	1	40
ENSG00000034677.12|mRNA|RNF19A|ENSG00000034677.12|ENSG00000034677.12|0|6031	1	47
ENSG00000038358.14|mRNA|EDC4|ENSG00000038358.14|ENSG00000038358.14|0|6173	1	96
ENSG00000039068.18|mRNA|CDH1|ENSG00000039068.18|ENSG00000039068.18|0|6177	1	57
ENSG00000042088.13|mRNA|TDP1|ENSG00000042088.13|ENSG00000042088.13|0|6227	1	69
ENSG00000044459.14|mRNA|CNTLN|ENSG00000044459.14|ENSG00000044459.14|0|11064	1	79
ENSG00000079459.12|mRNA|FDFT1|ENSG00000079459.12|ENSG00000079459.12|0|5202	1	54
ENSG00000080371.5|mRNA|RAB21|ENSG00000080371.5|ENSG00000080371.5|0|16036	1	67
ENSG00000081059.19|mRNA|TCF7|ENSG00000081059.19|ENSG00000081059.19|0|10063	1	71
ENSG00000101052.12|mRNA|IFT52|ENSG00000101052.12|ENSG00000101052.12|0|2542	1	53
ENSG00000101307.15|mRNA|SIRPB1|ENSG00000101307.15|ENSG00000101307.15|0|6091	1	97
ENSG00000101365.20|mRNA|IDH3B|ENSG00000101365.20|ENSG00000101365.20|0|2567	1	26
ENSG00000101782.14|mRNA|RIOK3|ENSG00000101782.14|ENSG00000101782.14|0|5320	1	78
ENSG00000102445.18|mRNA|RUBCNL|ENSG00000102445.18|ENSG00000102445.18|0|6105	1	54
ENSG00000102898.11|mRNA|NUTF2|ENSG00000102898.11|ENSG00000102898.11|0|3895	1	92
ENSG00000102900.12|mRNA|NUP93|ENSG00000102900.12|ENSG00000102900.12|0|11136	1	69
ENSG00000102935.11|mRNA|ZNF423|ENSG00000102935.11|ENSG00000102935.11|0|8997	1	13
ENSG00000104231.10|mRNA|ZFAND1|ENSG00000104231.10|ENSG00000104231.10|0|4214	1	33
ENSG00000104518.10|mRNA|GSDMD|ENSG00000104518.10|ENSG00000104518.10|0|5116	1	73
ENSG00000104814.12|mRNA|MAP4K1|ENSG00000104814.12|ENSG00000104814.12|0|3953	1	45
ENSG00000104884.14|mRNA|ERCC2|ENSG00000104884.14|ENSG00000104884.14|0|6450	1	86
ENSG00000104973.16|mRNA|MED25|ENSG00000104973.16|ENSG00000104973.16|0|6120	1	70
ENSG00000105248.15|mRNA|CCDC94|ENSG00000105248.15|ENSG00000105248.15|0|1671	1	58
ENSG00000105369.9|mRNA|CD79A|ENSG00000105369.9|ENSG00000105369.9|0|1503	1	72
ENSG00000105373.18|mRNA|NOP53|ENSG00000105373.18|ENSG00000105373.18|0|5341	1	73
ENSG00000105447.12|mRNA|GRWD1|ENSG00000105447.12|ENSG00000105447.12|0|5763	1	54
ENSG00000105643.9|mRNA|ARRDC2|ENSG00000105643.9|ENSG00000105643.9|0|4637	1	72
ENSG00000105750.14|mRNA|ZNF85|ENSG00000105750.14|ENSG00000105750.14|0|4668	1	52
ENSG00000105819.13|mRNA|PMPCB|ENSG00000105819.13|ENSG00000105819.13|0|4835	1	61
ENSG00000105849.5|mRNA|TWISTNB|ENSG00000105849.5|ENSG00000105849.5|0|3997	1	64
ENSG00000106351.12|mRNA|AGFG2|ENSG00000106351.12|ENSG00000106351.12|0|5478	1	91
ENSG00000106829.18|mRNA|TLE4|ENSG00000106829.18|ENSG00000106829.18|0|8187	1	87
ENSG00000107140.15|mRNA|TESK1|ENSG00000107140.15|ENSG00000107140.15|0|3298	1	36
ENSG00000107554.16|mRNA|DNMBP|ENSG00000107554.16|ENSG00000107554.16|0|8461	1	69
ENSG00000107890.16|mRNA|ANKRD26|ENSG00000107890.16|ENSG00000107890.16|0|7941	1	39
ENSG00000101190.12|mRNA|TCFL5|ENSG00000101190.12|ENSG00000101190.12|0|3436	1	23
ENSG00000100865.14|mRNA|CINP|ENSG00000100865.14|ENSG00000100865.14|0|5344	1	36
ENSG00000081721.11|mRNA|DUSP12|ENSG00000081721.11|ENSG00000081721.11|0|1762	1	84
ENSG00000100714.15|mRNA|MTHFD1|ENSG00000100714.15|ENSG00000100714.15|0|9377	1	65
ENSG00000082438.15|mRNA|COBLL1|ENSG00000082438.15|ENSG00000082438.15|0|17178	1	36
ENSG00000083223.17|mRNA|ZCCHC6|ENSG00000083223.17|ENSG00000083223.17|0|6707	1	30
ENSG00000084623.11|mRNA|EIF3I|ENSG00000084623.11|ENSG00000084623.11|0|1725	1	30
ENSG00000085491.15|mRNA|SLC25A24|ENSG00000085491.15|ENSG00000085491.15|0|6548	1	71
ENSG00000085871.8|mRNA|MGST2|ENSG00000085871.8|ENSG00000085871.8|0|3182	1	99
ENSG00000087995.15|mRNA|METTL2A|ENSG00000087995.15|ENSG00000087995.15|0|3843	1	41
ENSG00000089220.4|mRNA|PEBP1|ENSG00000089220.4|ENSG00000089220.4|0|1780	1	60
ENSG00000089685.14|mRNA|BIRC5|ENSG00000089685.14|ENSG00000089685.14|0|3815	1	20
ENSG00000089818.17|mRNA|NECAP1|ENSG00000089818.17|ENSG00000089818.17|0|8763	1	99
ENSG00000092036.18|mRNA|HAUS4|ENSG00000092036.18|ENSG00000092036.18|0|2539	1	9
ENSG00000092330.15|mRNA|TINF2|ENSG00000092330.15|ENSG00000092330.15|0|2712	1	43
ENSG00000093167.17|mRNA|LRRFIP2|ENSG00000093167.17|ENSG00000093167.17|0|10644	1	89
ENSG00000094880.10|mRNA|CDC23|ENSG00000094880.10|ENSG00000094880.10|0|4618	1	53
ENSG00000099860.8|mRNA|GADD45B|ENSG00000099860.8|ENSG00000099860.8|0|2138	1	70
ENSG00000099899.14|mRNA|TRMT2A|ENSG00000099899.14|ENSG00000099899.14|0|3963	1	32
ENSG00000100092.20|mRNA|SH3BP1|ENSG00000100092.20|ENSG00000100092.20|0|6170	1	71
ENSG00000100151.15|mRNA|PICK1|ENSG00000100151.15|ENSG00000100151.15|0|4371	1	53
ENSG00000100181.22|pseudogene|TPTEP1|ENSG00000100181.22|ENSG00000100181.22|0|9653	1	32
ENSG00000100216.5|mRNA|TOMM22|ENSG00000100216.5|ENSG00000100216.5|0|2191	1	93
ENSG00000100316.15|mRNA|RPL3|ENSG00000100316.15|ENSG00000100316.15|0|4787	1	69
ENSG00000100348.9|mRNA|TXN2|ENSG00000100348.9|ENSG00000100348.9|0|2050	1	48
ENSG00000100422.13|mRNA|CERK|ENSG00000100422.13|ENSG00000100422.13|0|4938	1	75
ENSG00000100523.14|mRNA|DDHD1|ENSG00000100523.14|ENSG00000100523.14|0|17944	1	28
ENSG00000100605.16|mRNA|ITPK1|ENSG00000100605.16|ENSG00000100605.16|0|6783	1	26
ENSG00000100614.17|mRNA|PPM1A|ENSG00000100614.17|ENSG00000100614.17|0|11860	1	26
ENSG00000134668.12|mRNA|SPOCD1|ENSG00000134668.12|ENSG00000134668.12|0|7085	1	83
ENSG00000135318.11|mRNA|NT5E|ENSG00000135318.11|ENSG00000135318.11|0|4533	1	23
ENSG00000197930.12|mRNA|ERO1A|ENSG00000197930.12|ENSG00000197930.12|0|7548	1	94
ENSG00000171202.6|mRNA|TMEM126A|ENSG00000171202.6|ENSG00000171202.6|0|971	1	94
ENSG00000169239.12|mRNA|CA5B|ENSG00000169239.12|ENSG00000169239.12|0|8520	1	77
ENSG00000169288.17|mRNA|MRPL1|ENSG00000169288.17|ENSG00000169288.17|0|1943	1	54
ENSG00000169612.3|mRNA|FAM103A1|ENSG00000169612.3|ENSG00000169612.3|0|1568	1	30
ENSG00000169660.15|mRNA|HEXDC|ENSG00000169660.15|ENSG00000169660.15|0|4153	1	59
ENSG00000169710.8|mRNA|FASN|ENSG00000169710.8|ENSG00000169710.8|0|9364	1	42
ENSG00000169826.7|mRNA|CSGALNACT2|ENSG00000169826.7|ENSG00000169826.7|0|3730	1	44
ENSG00000169857.7|mRNA|AVEN|ENSG00000169857.7|ENSG00000169857.7|0|1808	1	31
ENSG00000170296.9|mRNA|GABARAP|ENSG00000170296.9|ENSG00000170296.9|0|2266	1	77
ENSG00000170445.12|mRNA|HARS|ENSG00000170445.12|ENSG00000170445.12|0|8436	1	39
ENSG00000170448.11|mRNA|NFXL1|ENSG00000170448.11|ENSG00000170448.11|0|4484	1	57
ENSG00000170584.10|mRNA|NUDCD2|ENSG00000170584.10|ENSG00000170584.10|0|8847	1	88
ENSG00000171033.12|mRNA|PKIA|ENSG00000171033.12|ENSG00000171033.12|0|4216	1	88
ENSG00000171307.18|mRNA|ZDHHC16|ENSG00000171307.18|ENSG00000171307.18|0|3078	1	19
ENSG00000173868.11|mRNA|PHOSPHO1|ENSG00000173868.11|ENSG00000173868.11|0|2375	1	97
ENSG00000171723.15|mRNA|GPHN|ENSG00000171723.15|ENSG00000171723.15|0|6007	1	66
ENSG00000171848.14|mRNA|RRM2|ENSG00000171848.14|ENSG00000171848.14|0|5323	1	89
ENSG00000171862.10|mRNA|PTEN|ENSG00000171862.10|ENSG00000171862.10|0|11581	1	69
ENSG00000171914.16|mRNA|TLN2|ENSG00000171914.16|ENSG00000171914.16|0|16209	1	79
ENSG00000172500.12|mRNA|FIBP|ENSG00000172500.12|ENSG00000172500.12|0|3353	1	49
ENSG00000172575.11|mRNA|RASGRP1|ENSG00000172575.11|ENSG00000172575.11|0|6097	1	51
ENSG00000172794.19|mRNA|RAB37|ENSG00000172794.19|ENSG00000172794.19|0|5074	1	23
ENSG00000172922.8|mRNA|RNASEH2C|ENSG00000172922.8|ENSG00000172922.8|0|3697	1	77
ENSG00000173068.17|mRNA|BNC2|ENSG00000173068.17|ENSG00000173068.17|0|15323	1	83
ENSG00000173267.13|mRNA|SNCG|ENSG00000173267.13|ENSG00000173267.13|0|1247	1	29
ENSG00000173542.8|mRNA|MOB1B|ENSG00000173542.8|ENSG00000173542.8|0|8801	1	26
ENSG00000173726.10|mRNA|TOMM20|ENSG00000173726.10|ENSG00000173726.10|0|3542	1	91
ENSG00000169224.12|mRNA|GCSAML|ENSG00000169224.12|ENSG00000169224.12|0|4680	1	3
ENSG00000169131.11|mRNA|ZNF354A|ENSG00000169131.11|ENSG00000169131.11|0|4031	1	78
ENSG00000169021.5|mRNA|UQCRFS1|ENSG00000169021.5|ENSG00000169021.5|0|3475	1	69
ENSG00000168701.18|mRNA|TMEM208|ENSG00000168701.18|ENSG00000168701.18|0|1787	1	44
ENSG00000165675.16|mRNA|ENOX2|ENSG00000165675.16|ENSG00000165675.16|0|4279	1	48
ENSG00000165752.16|mRNA|STK32C|ENSG00000165752.16|ENSG00000165752.16|0|3543	1	45
ENSG00000165792.17|mRNA|METTL17|ENSG00000165792.17|ENSG00000165792.17|0|4449	1	68
ENSG00000165914.14|mRNA|TTC7B|ENSG00000165914.14|ENSG00000165914.14|0|21268	1	85
ENSG00000166136.15|mRNA|NDUFB8|ENSG00000166136.15|ENSG00000166136.15|0|1999	1	53
ENSG00000166147.13|mRNA|FBN1|ENSG00000166147.13|ENSG00000166147.13|0|16057	1	51
ENSG00000166260.11|mRNA|COX11|ENSG00000166260.11|ENSG00000166260.11|0|6488	1	94
ENSG00000166347.18|mRNA|CYB5A|ENSG00000166347.18|ENSG00000166347.18|0|9313	1	56
ENSG00000166478.9|mRNA|ZNF143|ENSG00000166478.9|ENSG00000166478.9|0|4233	1	69
ENSG00000166484.19|mRNA|MAPK7|ENSG00000166484.19|ENSG00000166484.19|0|5196	1	88
ENSG00000166529.14|mRNA|ZSCAN21|ENSG00000166529.14|ENSG00000166529.14|0|2140	1	27
ENSG00000166710.17|mRNA|B2M|ENSG00000166710.17|ENSG00000166710.17|0|6089	1	14
ENSG00000166825.13|mRNA|ANPEP|ENSG00000166825.13|ENSG00000166825.13|0|4871	1	1
ENSG00000166886.12|mRNA|NAB2|ENSG00000166886.12|ENSG00000166886.12|0|3010	1	32
ENSG00000166971.16|mRNA|AKTIP|ENSG00000166971.16|ENSG00000166971.16|0|5202	1	17
ENSG00000166974.12|mRNA|MAPRE2|ENSG00000166974.12|ENSG00000166974.12|0|6180	1	68
ENSG00000167074.14|mRNA|TEF|ENSG00000167074.14|ENSG00000167074.14|0|4715	1	6
ENSG00000167261.13|mRNA|DPEP2|ENSG00000167261.13|ENSG00000167261.13|0|3498	1	7
ENSG00000167414.4|mRNA|GNG8|ENSG00000167414.4|ENSG00000167414.4|0|216	1	70
ENSG00000167460.14|mRNA|TPM4|ENSG00000167460.14|ENSG00000167460.14|0|7414	1	94
ENSG00000167601.11|mRNA|AXL|ENSG00000167601.11|ENSG00000167601.11|0|5154	1	78
ENSG00000167977.8|mRNA|KCTD5|ENSG00000167977.8|ENSG00000167977.8|0|3420	1	58
ENSG00000167994.11|mRNA|RAB3IL1|ENSG00000167994.11|ENSG00000167994.11|0|3006	1	23
ENSG00000168256.17|mRNA|NKIRAS2|ENSG00000168256.17|ENSG00000168256.17|0|5566	1	38
ENSG00000168461.12|mRNA|RAB31|ENSG00000168461.12|ENSG00000168461.12|0|5586	1	25
ENSG00000173848.18|mRNA|NET1|ENSG00000173848.18|ENSG00000173848.18|0|4175	1	96
ENSG00000174059.16|mRNA|CD34|ENSG00000174059.16|ENSG00000174059.16|0|9219	1	80
ENSG00000135334.8|mRNA|AKIRIN2|ENSG00000135334.8|ENSG00000135334.8|0|1999	1	34
ENSG00000187446.11|mRNA|CHP1|ENSG00000187446.11|ENSG00000187446.11|0|3950	1	39
ENSG00000184588.17|mRNA|PDE4B|ENSG00000184588.17|ENSG00000184588.17|0|8644	1	57
ENSG00000184613.10|mRNA|NELL2|ENSG00000184613.10|ENSG00000184613.10|0|6424	1	59
ENSG00000184924.5|mRNA|PTRHD1|ENSG00000184924.5|ENSG00000184924.5|0|1917	1	78
ENSG00000185049.14|mRNA|NELFA|ENSG00000185049.14|ENSG00000185049.14|0|5935	1	55
ENSG00000185122.10|mRNA|HSF1|ENSG00000185122.10|ENSG00000185122.10|0|5307	1	74
ENSG00000185551.14|mRNA|NR2F2|ENSG00000185551.14|ENSG00000185551.14|0|6459	1	40
ENSG00000185608.8|mRNA|MRPL40|ENSG00000185608.8|ENSG00000185608.8|0|1965	1	87
ENSG00000185722.16|mRNA|ANKFY1|ENSG00000185722.16|ENSG00000185722.16|0|14120	1	64
ENSG00000186190.7|mRNA|BPIFB3|ENSG00000186190.7|ENSG00000186190.7|0|1454	1	60
ENSG00000186350.9|mRNA|RXRA|ENSG00000186350.9|ENSG00000186350.9|0|10814	1	85
ENSG00000186889.9|mRNA|TMEM17|ENSG00000186889.9|ENSG00000186889.9|0|2982	1	55
ENSG00000187116.13|mRNA|LILRA5|ENSG00000187116.13|ENSG00000187116.13|0|1760	1	96
ENSG00000187531.13|mRNA|SIRT7|ENSG00000187531.13|ENSG00000187531.13|0|6152	1	93
ENSG00000174099.10|mRNA|MSRB3|ENSG00000174099.10|ENSG00000174099.10|0|5791	1	45
ENSG00000187764.11|mRNA|SEMA4D|ENSG00000187764.11|ENSG00000187764.11|0|14160	1	93
ENSG00000188191.14|mRNA|PRKAR1B|ENSG00000188191.14|ENSG00000188191.14|0|4491	1	41
ENSG00000188517.14|mRNA|COL25A1|ENSG00000188517.14|ENSG00000188517.14|0|6653	1	98
ENSG00000188921.13|mRNA|HACD4|ENSG00000188921.13|ENSG00000188921.13|0|9152	1	84
ENSG00000189077.10|mRNA|TMEM120A|ENSG00000189077.10|ENSG00000189077.10|0|1997	1	63
ENSG00000196465.10|mRNA|MYL6B|ENSG00000196465.10|ENSG00000196465.10|0|3259	1	96
ENSG00000196562.14|mRNA|SULF2|ENSG00000196562.14|ENSG00000196562.14|0|6657	1	95
ENSG00000196735.11|mRNA|HLA-DQA1|ENSG00000196735.11|ENSG00000196735.11|0|6927	1	46
ENSG00000196743.8|mRNA|GM2A|ENSG00000196743.8|ENSG00000196743.8|0|4479	1	54
ENSG00000196826.7|mRNA|AC008758.1|ENSG00000196826.7|ENSG00000196826.7|0|4505	1	48
ENSG00000197249.13|mRNA|SERPINA1|ENSG00000197249.13|ENSG00000197249.13|0|4902	1	90
ENSG00000197353.3|mRNA|LYPD2|ENSG00000197353.3|ENSG00000197353.3|0|594	1	19
ENSG00000184226.14|mRNA|PCDH9|ENSG00000184226.14|ENSG00000184226.14|0|30944	1	82
ENSG00000184117.11|mRNA|NIPSNAP1|ENSG00000184117.11|ENSG00000184117.11|0|3067	1	88
ENSG00000183605.16|mRNA|SFXN4|ENSG00000183605.16|ENSG00000183605.16|0|1868	1	72
ENSG00000183255.11|mRNA|PTTG1IP|ENSG00000183255.11|ENSG00000183255.11|0|3537	1	67
ENSG00000174444.14|mRNA|RPL4|ENSG00000174444.14|ENSG00000174444.14|0|5637	1	82
ENSG00000174775.16|mRNA|HRAS|ENSG00000174775.16|ENSG00000174775.16|0|1854	1	51
ENSG00000175595.14|mRNA|ERCC4|ENSG00000175595.14|ENSG00000175595.14|0|8460	1	53
ENSG00000175792.11|mRNA|RUVBL1|ENSG00000175792.11|ENSG00000175792.11|0|6860	1	87
ENSG00000176209.11|mRNA|SMIM19|ENSG00000176209.11|ENSG00000176209.11|0|4056	1	80
ENSG00000176393.10|mRNA|RNPEP|ENSG00000176393.10|ENSG00000176393.10|0|3479	1	72
ENSG00000176485.11|mRNA|PLA2G16|ENSG00000176485.11|ENSG00000176485.11|0|3116	1	61
ENSG00000176731.11|mRNA|C8orf59|ENSG00000176731.11|ENSG00000176731.11|0|2514	1	96
ENSG00000177051.5|mRNA|FBXO46|ENSG00000177051.5|ENSG00000177051.5|0|3535	1	91
ENSG00000177370.4|mRNA|TIMM22|ENSG00000177370.4|ENSG00000177370.4|0|3194	1	64
ENSG00000178149.16|mRNA|DALRD3|ENSG00000178149.16|ENSG00000178149.16|0|3682	1	64
ENSG00000178605.13|mRNA|GTPBP6|ENSG00000178605.13|ENSG00000178605.13|0|2964	1	66
ENSG00000178952.10|mRNA|TUFM|ENSG00000178952.10|ENSG00000178952.10|0|2271	1	6
ENSG00000178982.9|mRNA|EIF3K|ENSG00000178982.9|ENSG00000178982.9|0|2798	1	21
ENSG00000178996.13|mRNA|SNX18|ENSG00000178996.13|ENSG00000178996.13|0|6653	1	95
ENSG00000179399.14|mRNA|GPC5|ENSG00000179399.14|ENSG00000179399.14|0|3544	1	43
ENSG00000180284.5|pseudogene|AL049610.1|ENSG00000180284.5|ENSG00000180284.5|0|372	1	60
ENSG00000180644.7|mRNA|PRF1|ENSG00000180644.7|ENSG00000180644.7|0|2534	1	50
ENSG00000181904.8|mRNA|C5orf24|ENSG00000181904.8|ENSG00000181904.8|0|5741	1	51
ENSG00000182247.9|mRNA|UBE2E2|ENSG00000182247.9|ENSG00000182247.9|0|3274	1	59
ENSG00000182712.15|mRNA|CMC4|ENSG00000182712.15|ENSG00000182712.15|0|1539	1	91
ENSG00000182718.16|mRNA|ANXA2|ENSG00000182718.16|ENSG00000182718.16|0|8824	1	85
ENSG00000182872.15|mRNA|RBM10|ENSG00000182872.15|ENSG00000182872.15|0|3889	1	49
ENSG00000182934.11|mRNA|SRPRA|ENSG00000182934.11|ENSG00000182934.11|0|4167	1	59
ENSG00000183137.14|mRNA|CEP57L1|ENSG00000183137.14|ENSG00000183137.14|0|6432	1	69
ENSG00000165672.6|mRNA|PRDX3|ENSG00000165672.6|ENSG00000165672.6|0|3417	1	95
ENSG00000165661.16|mRNA|QSOX2|ENSG00000165661.16|ENSG00000165661.16|0|4530	1	40
ENSG00000165646.11|mRNA|SLC18A2|ENSG00000165646.11|ENSG00000165646.11|0|4125	1	41
ENSG00000145191.12|mRNA|EIF2B5|ENSG00000145191.12|ENSG00000145191.12|0|5702	1	17
ENSG00000142192.20|mRNA|APP|ENSG00000142192.20|ENSG00000142192.20|0|6316	1	65
ENSG00000142556.18|mRNA|ZNF614|ENSG00000142556.18|ENSG00000142556.18|0|5813	1	69
ENSG00000142856.16|mRNA|ITGB3BP|ENSG00000142856.16|ENSG00000142856.16|0|5459	1	49
ENSG00000143184.4|mRNA|XCL1|ENSG00000143184.4|ENSG00000143184.4|0|1367	1	97
ENSG00000143222.11|mRNA|UFC1|ENSG00000143222.11|ENSG00000143222.11|0|2274	1	97
ENSG00000143621.16|mRNA|ILF2|ENSG00000143621.16|ENSG00000143621.16|0|2281	1	7
ENSG00000143851.15|mRNA|PTPN7|ENSG00000143851.15|ENSG00000143851.15|0|5906	1	85
ENSG00000143947.13|mRNA|RPS27A|ENSG00000143947.13|ENSG00000143947.13|0|3130	1	82
ENSG00000144589.21|mRNA|STK11IP|ENSG00000144589.21|ENSG00000144589.21|0|5694	1	80
ENSG00000144659.10|mRNA|SLC25A38|ENSG00000144659.10|ENSG00000144659.10|0|2151	1	54
ENSG00000144736.13|mRNA|SHQ1|ENSG00000144736.13|ENSG00000144736.13|0|5841	1	75
ENSG00000144746.6|mRNA|ARL6IP5|ENSG00000144746.6|ENSG00000144746.6|0|2522	1	40
ENSG00000145416.13|mRNA|MARCH1|ENSG00000145416.13|ENSG00000145416.13|0|10421	1	57
ENSG00000165526.8|mRNA|RPUSD4|ENSG00000165526.8|ENSG00000165526.8|0|4083	1	91
ENSG00000145495.15|mRNA|MARCH6|ENSG00000145495.15|ENSG00000145495.15|0|11336	1	28
ENSG00000146416.17|mRNA|AIG1|ENSG00000146416.17|ENSG00000146416.17|0|6016	1	91
ENSG00000146576.12|mRNA|C7orf26|ENSG00000146576.12|ENSG00000146576.12|0|2728	1	82
ENSG00000146592.16|mRNA|CREB5|ENSG00000146592.16|ENSG00000146592.16|0|11674	1	53
ENSG00000147130.14|mRNA|ZMYM3|ENSG00000147130.14|ENSG00000147130.14|0|6916	1	66
ENSG00000147274.14|mRNA|RBMX|ENSG00000147274.14|ENSG00000147274.14|0|5882	1	78
ENSG00000147400.8|mRNA|CETN2|ENSG00000147400.8|ENSG00000147400.8|0|1928	1	57
ENSG00000147813.15|mRNA|NAPRT|ENSG00000147813.15|ENSG00000147813.15|0|3079	1	32
ENSG00000148019.12|mRNA|CEP78|ENSG00000148019.12|ENSG00000148019.12|0|14355	1	79
ENSG00000148158.16|mRNA|SNX30|ENSG00000148158.16|ENSG00000148158.16|0|11578	1	20
ENSG00000148700.14|mRNA|ADD3|ENSG00000148700.14|ENSG00000148700.14|0|6541	1	90
ENSG00000149262.16|mRNA|INTS4|ENSG00000149262.16|ENSG00000149262.16|0|6074	1	64
ENSG00000141994.15|mRNA|DUS3L|ENSG00000141994.15|ENSG00000141994.15|0|3642	1	92
ENSG00000141971.12|mRNA|MVB12A|ENSG00000141971.12|ENSG00000141971.12|0|4053	1	53
ENSG00000141854.9|mRNA|MISP3|ENSG00000141854.9|ENSG00000141854.9|0|2354	1	81
ENSG00000140416.19|mRNA|TPM1|ENSG00000140416.19|ENSG00000140416.19|0|12492	1	91
ENSG00000135535.15|mRNA|CD164|ENSG00000135535.15|ENSG00000135535.15|0|6842	1	40
ENSG00000136040.8|mRNA|PLXNC1|ENSG00000136040.8|ENSG00000136040.8|0|9887	1	56
ENSG00000136238.17|mRNA|RAC1|ENSG00000136238.17|ENSG00000136238.17|0|3114	1	10
ENSG00000136271.10|mRNA|DDX56|ENSG00000136271.10|ENSG00000136271.10|0|4068	1	42
ENSG00000136463.7|mRNA|TACO1|ENSG00000136463.7|ENSG00000136463.7|0|2315	1	70
ENSG00000136630.12|mRNA|HLX|ENSG00000136630.12|ENSG00000136630.12|0|5660	1	32
ENSG00000136717.14|mRNA|BIN1|ENSG00000136717.14|ENSG00000136717.14|0|6929	1	50
ENSG00000136997.17|mRNA|MYC|ENSG00000136997.17|ENSG00000136997.17|0|3001	1	94
ENSG00000137145.20|mRNA|DENND4C|ENSG00000137145.20|ENSG00000137145.20|0|8745	1	51
ENSG00000137171.14|mRNA|KLC4|ENSG00000137171.14|ENSG00000137171.14|0|6421	1	16
ENSG00000137265.14|mRNA|IRF4|ENSG00000137265.14|ENSG00000137265.14|0|5898	1	42
ENSG00000137509.10|mRNA|PRCP|ENSG00000137509.10|ENSG00000137509.10|0|12798	1	73
ENSG00000138134.11|mRNA|STAMBPL1|ENSG00000138134.11|ENSG00000138134.11|0|6323	1	41
ENSG00000138231.12|mRNA|DBR1|ENSG00000138231.12|ENSG00000138231.12|0|3160	1	23
ENSG00000138382.14|mRNA|METTL5|ENSG00000138382.14|ENSG00000138382.14|0|2865	1	93
ENSG00000138411.10|mRNA|HECW2|ENSG00000138411.10|ENSG00000138411.10|0|12692	1	98
ENSG00000138617.14|mRNA|PARP16|ENSG00000138617.14|ENSG00000138617.14|0|3715	1	97
ENSG00000138795.9|mRNA|LEF1|ENSG00000138795.9|ENSG00000138795.9|0|5361	1	86
ENSG00000138801.8|mRNA|PAPSS1|ENSG00000138801.8|ENSG00000138801.8|0|3478	1	97
ENSG00000139318.7|mRNA|DUSP6|ENSG00000139318.7|ENSG00000139318.7|0|4632	1	14
ENSG00000139428.11|mRNA|MMAB|ENSG00000139428.11|ENSG00000139428.11|0|6290	1	10
ENSG00000139505.11|mRNA|MTMR6|ENSG00000139505.11|ENSG00000139505.11|0|5779	1	67
ENSG00000139637.13|mRNA|C12orf10|ENSG00000139637.13|ENSG00000139637.13|0|2509	1	36
ENSG00000139644.12|mRNA|TMBIM6|ENSG00000139644.12|ENSG00000139644.12|0|6186	1	61
ENSG00000140395.8|mRNA|WDR61|ENSG00000140395.8|ENSG00000140395.8|0|7279	1	62
ENSG00000149532.15|mRNA|CPSF7|ENSG00000149532.15|ENSG00000149532.15|0|6036	1	78
ENSG00000149600.11|mRNA|COMMD7|ENSG00000149600.11|ENSG00000149600.11|0|2584	1	59
ENSG00000149658.17|mRNA|YTHDF1|ENSG00000149658.17|ENSG00000149658.17|0|3301	1	69
ENSG00000003147.17|mRNA|ICA1|ENSG00000003147.17|ENSG00000003147.17|0|4891	1	96
ENSG00000160321.14|mRNA|ZNF208|ENSG00000160321.14|ENSG00000160321.14|0|6867	1	93
ENSG00000160570.13|mRNA|DEDD2|ENSG00000160570.13|ENSG00000160570.13|0|2631	1	59
ENSG00000160695.14|mRNA|VPS11|ENSG00000160695.14|ENSG00000160695.14|0|5907	1	87
ENSG00000160803.7|mRNA|UBQLN4|ENSG00000160803.7|ENSG00000160803.7|0|3878	1	56
ENSG00000160856.20|mRNA|FCRL3|ENSG00000160856.20|ENSG00000160856.20|0|6538	1	99
ENSG00000162300.11|mRNA|ZFPL1|ENSG00000162300.11|ENSG00000162300.11|0|2784	1	83
ENSG00000162614.18|mRNA|NEXN|ENSG00000162614.18|ENSG00000162614.18|0|4436	1	82
ENSG00000162972.10|mRNA|MAIP1|ENSG00000162972.10|ENSG00000162972.10|0|1624	1	49
ENSG00000163131.10|mRNA|CTSS|ENSG00000163131.10|ENSG00000163131.10|0|4228	1	82
ENSG00000163162.8|mRNA|RNF149|ENSG00000163162.8|ENSG00000163162.8|0|4836	1	72
ENSG00000163171.7|mRNA|CDC42EP3|ENSG00000163171.7|ENSG00000163171.7|0|10406	1	45
ENSG00000163444.11|mRNA|TMEM183A|ENSG00000163444.11|ENSG00000163444.11|0|4026	1	81
ENSG00000163541.11|mRNA|SUCLG1|ENSG00000163541.11|ENSG00000163541.11|0|4286	1	60
ENSG00000163697.16|mRNA|APBB2|ENSG00000163697.16|ENSG00000163697.16|0|12956	1	66
ENSG00000163735.6|mRNA|CXCL5|ENSG00000163735.6|ENSG00000163735.6|0|2538	1	27
ENSG00000163739.4|mRNA|CXCL1|ENSG00000163739.4|ENSG00000163739.4|0|1296	1	98
ENSG00000163803.12|mRNA|PLB1|ENSG00000163803.12|ENSG00000163803.12|0|8238	1	28
ENSG00000163808.16|mRNA|KIF15|ENSG00000163808.16|ENSG00000163808.16|0|5285	1	38
ENSG00000163898.9|mRNA|LIPH|ENSG00000163898.9|ENSG00000163898.9|0|4122	1	67
ENSG00000163918.10|mRNA|RFC4|ENSG00000163918.10|ENSG00000163918.10|0|2997	1	20
ENSG00000164081.12|mRNA|TEX264|ENSG00000164081.12|ENSG00000164081.12|0|5688	1	83
ENSG00000164125.15|mRNA|FAM198B|ENSG00000164125.15|ENSG00000164125.15|0|7880	1	96
ENSG00000164332.7|mRNA|UBLCP1|ENSG00000164332.7|ENSG00000164332.7|0|2676	1	17
ENSG00000164970.14|mRNA|FAM219A|ENSG00000164970.14|ENSG00000164970.14|0|3782	1	95
ENSG00000165119.20|mRNA|HNRNPK|ENSG00000165119.20|ENSG00000165119.20|0|5114	1	73
ENSG00000160310.17|mRNA|PRMT2|ENSG00000160310.17|ENSG00000160310.17|0|8031	1	62
ENSG00000160014.16|mRNA|CALM3|ENSG00000160014.16|ENSG00000160014.16|0|3667	1	91
ENSG00000149798.4|mRNA|CDC42EP2|ENSG00000149798.4|ENSG00000149798.4|0|2224	1	61
ENSG00000159618.15|mRNA|ADGRG5|ENSG00000159618.15|ENSG00000159618.15|0|5852	1	64
ENSG00000150768.15|mRNA|DLAT|ENSG00000150768.15|ENSG00000150768.15|0|4831	1	94
ENSG00000150776.17|mRNA|C11orf57|ENSG00000150776.17|ENSG00000150776.17|0|5755	1	76
ENSG00000151651.15|mRNA|ADAM8|ENSG00000151651.15|ENSG00000151651.15|0|4780	1	76
ENSG00000151692.14|mRNA|RNF144A|ENSG00000151692.14|ENSG00000151692.14|0|6473	1	55
ENSG00000151779.12|mRNA|NBAS|ENSG00000151779.12|ENSG00000151779.12|0|8948	1	59
ENSG00000151948.11|mRNA|GLT1D1|ENSG00000151948.11|ENSG00000151948.11|0|3478	1	56
ENSG00000152219.4|mRNA|ARL14EP|ENSG00000152219.4|ENSG00000152219.4|0|5465	1	11
ENSG00000153707.16|mRNA|PTPRD|ENSG00000153707.16|ENSG00000153707.16|0|11165	1	9
ENSG00000153767.9|mRNA|GTF2E1|ENSG00000153767.9|ENSG00000153767.9|0|3370	1	72
ENSG00000153993.13|mRNA|SEMA3D|ENSG00000153993.13|ENSG00000153993.13|0|8062	1	50
ENSG00000154473.17|mRNA|BUB3|ENSG00000154473.17|ENSG00000154473.17|0|8300	1	41
ENSG00000154589.6|mRNA|LY96|ENSG00000154589.6|ENSG00000154589.6|0|607	1	60
ENSG00000155926.13|mRNA|SLA|ENSG00000155926.13|ENSG00000155926.13|0|7637	1	83
ENSG00000156873.15|mRNA|PHKG2|ENSG00000156873.15|ENSG00000156873.15|0|7509	1	39
ENSG00000156931.15|mRNA|VPS8|ENSG00000156931.15|ENSG00000156931.15|0|10366	1	87
ENSG00000157554.18|mRNA|ERG|ENSG00000157554.18|ENSG00000157554.18|0|7588	1	93
ENSG00000157827.19|mRNA|FMNL2|ENSG00000157827.19|ENSG00000157827.19|0|6519	1	99
ENSG00000157873.17|mRNA|TNFRSF14|ENSG00000157873.17|ENSG00000157873.17|0|6219	1	49
ENSG00000158470.5|mRNA|B4GALT5|ENSG00000158470.5|ENSG00000158470.5|0|4722	1	74
ENSG00000159128.14|mRNA|IFNGR2|ENSG00000159128.14|ENSG00000159128.14|0|2960	1	68
ENSG00000159199.13|mRNA|ATP5G1|ENSG00000159199.13|ENSG00000159199.13|0|2615	1	57
ENSG00000159200.17|mRNA|RCAN1|ENSG00000159200.17|ENSG00000159200.17|0|6990	1	21
ENSG00000159348.12|mRNA|CYB5R1|ENSG00000159348.12|ENSG00000159348.12|0|4504	1	99
ENSG00000159377.10|mRNA|PSMB4|ENSG00000159377.10|ENSG00000159377.10|0|2158	1	42
ENSG00000159496.14|mRNA|RGL4|ENSG00000159496.14|ENSG00000159496.14|0|4715	1	51
hsa_circ_0092013|circRNA|hsa_circ_0092013|hsa_circ_0092013|hsa_circ_0092013|0|600	1	91

## Sheet: expression-stomach-HD
feature	count	importance-rank
ENSG00000279738.1|lncRNA|AL022311.1|ENSG00000279738.1|ENSG00000279738.1|0|19416	92	29.2935
ENSG00000156508.17|mRNA|EEF1A1|ENSG00000156508.17|ENSG00000156508.17|0|5948	92	33.6413
ENSG00000169100.13|mRNA|SLC25A6|ENSG00000169100.13|ENSG00000169100.13|0|2164	83	36.0843
ENSG00000100129.17|mRNA|EIF3L|ENSG00000100129.17|ENSG00000100129.17|0|4296	82	40.5366
ENSG00000111276.10|mRNA|CDKN1B|ENSG00000111276.10|ENSG00000111276.10|0|2811	82	17.3659
ENSG00000102317.17|mRNA|RBM3|ENSG00000102317.17|ENSG00000102317.17|0|3731	73	31.726
ENSG00000147403.16|mRNA|RPL10|ENSG00000147403.16|ENSG00000147403.16|0|4825	72	36.6111
ENSG00000132676.15|mRNA|DAP3|ENSG00000132676.15|ENSG00000132676.15|0|4588	71	29.8873
ENSG00000254772.9|mRNA|EEF1G|ENSG00000254772.9|ENSG00000254772.9|0|2716	71	44.8873
ENSG00000255508.7|mRNA|AP002990.1|ENSG00000255508.7|ENSG00000255508.7|0|5197	71	43.6761
ENSG00000265399.1|lncRNA|AP005329.2|ENSG00000265399.1|ENSG00000265399.1|0|1771	68	25.5441
ENSG00000124614.13|mRNA|RPS10|ENSG00000124614.13|ENSG00000124614.13|0|1642	65	37.6154
ENSG00000175390.13|mRNA|EIF3F|ENSG00000175390.13|ENSG00000175390.13|0|9431	65	43.2615
ENSG00000277957.1|mRNA|SENP3-EIF4A1|ENSG00000277957.1|ENSG00000277957.1|0|3519	62	39.7903
ENSG00000257267.3|pseudogene|ZNF271P|ENSG00000257267.3|ENSG00000257267.3|0|7450	58	31.069
ENSG00000100316.15|mRNA|RPL3|ENSG00000100316.15|ENSG00000100316.15|0|4787	58	47.8448
ENSG00000161960.14|mRNA|EIF4A1|ENSG00000161960.14|ENSG00000161960.14|0|5316	58	36.4828
hsa_circ_0042768|circRNA|hsa_circ_0042768|hsa_circ_0042768|hsa_circ_0042768|0|600	56	25.0893
ENSG00000140988.15|mRNA|RPS2|ENSG00000140988.15|ENSG00000140988.15|0|2413	55	51.8182
ENSG00000155463.12|mRNA|OXA1L|ENSG00000155463.12|ENSG00000155463.12|0|4497	54	49.2037
ENSG00000129158.10|mRNA|SERGEF|ENSG00000129158.10|ENSG00000129158.10|0|3502	54	49.8889
ENSG00000169230.9|mRNA|PRELID1|ENSG00000169230.9|ENSG00000169230.9|0|1875	53	31.8868
ENSG00000144909.7|mRNA|OSBPL11|ENSG00000144909.7|ENSG00000144909.7|0|4191	53	41.4151
ENSG00000119866.20|mRNA|BCL11A|ENSG00000119866.20|ENSG00000119866.20|0|8375	51	49.2157
ENSG00000069399.14|mRNA|BCL3|ENSG00000069399.14|ENSG00000069399.14|0|3242	50	41.28
ENSG00000168028.13|mRNA|RPSA|ENSG00000168028.13|ENSG00000168028.13|0|3936	50	54.24
ENSG00000187514.16|mRNA|PTMA|ENSG00000187514.16|ENSG00000187514.16|0|3378	49	18.9796
ENSG00000163931.15|mRNA|TKT|ENSG00000163931.15|ENSG00000163931.15|0|9507	48	57.125
ENSG00000107829.13|mRNA|FBXW4|ENSG00000107829.13|ENSG00000107829.13|0|5038	47	42.8085
ENSG00000135486.17|mRNA|HNRNPA1|ENSG00000135486.17|ENSG00000135486.17|0|5093	47	29.1702
ENSG00000163682.15|mRNA|RPL9|ENSG00000163682.15|ENSG00000163682.15|0|3259	46	48.2174
ENSG00000197555.9|mRNA|SIPA1L1|ENSG00000197555.9|ENSG00000197555.9|0|12412	45	39.0222
ENSG00000109686.17|mRNA|SH3D19|ENSG00000109686.17|ENSG00000109686.17|0|7789	45	52.6
ENSG00000101444.12|mRNA|AHCY|ENSG00000101444.12|ENSG00000101444.12|0|3894	45	31
ENSG00000168522.12|mRNA|FNTA|ENSG00000168522.12|ENSG00000168522.12|0|9551	44	44.1591
ENSG00000084092.6|mRNA|NOA1|ENSG00000084092.6|ENSG00000084092.6|0|3415	44	43.8864
ENSG00000109475.16|mRNA|RPL34|ENSG00000109475.16|ENSG00000109475.16|0|3393	43	52.8837
ENSG00000131095.12|mRNA|GFAP|ENSG00000131095.12|ENSG00000131095.12|0|12110	42	42.2857
ENSG00000115207.13|mRNA|GTF3C2|ENSG00000115207.13|ENSG00000115207.13|0|5839	41	41.9268
ENSG00000077312.8|mRNA|SNRPA|ENSG00000077312.8|ENSG00000077312.8|0|2361	40	49.325
ENSG00000261884.2|mRNA|AC040162.1|ENSG00000261884.2|ENSG00000261884.2|0|5685	40	45.9
ENSG00000276141.4|pseudogene|WHAMMP3|ENSG00000276141.4|ENSG00000276141.4|0|7269	40	43.65
ENSG00000110700.6|mRNA|RPS13|ENSG00000110700.6|ENSG00000110700.6|0|2186	39	36.6154
ENSG00000144218.18|mRNA|AFF3|ENSG00000144218.18|ENSG00000144218.18|0|12737	39	46.1538
ENSG00000105568.17|mRNA|PPP2R1A|ENSG00000105568.17|ENSG00000105568.17|0|7437	39	46.9487
ENSG00000174738.12|mRNA|NR1D2|ENSG00000174738.12|ENSG00000174738.12|0|5820	38	32.9211
ENSG00000163738.18|mRNA|MTHFD2L|ENSG00000163738.18|ENSG00000163738.18|0|9819	38	40.1316
ENSG00000128989.10|mRNA|ARPP19|ENSG00000128989.10|ENSG00000128989.10|0|6917	38	19.6053
ENSG00000063046.17|mRNA|EIF4B|ENSG00000063046.17|ENSG00000063046.17|0|6146	38	50.9474
ENSG00000138326.18|mRNA|RPS24|ENSG00000138326.18|ENSG00000138326.18|0|4880	38	48.0789
ENSG00000167202.11|mRNA|TBC1D2B|ENSG00000167202.11|ENSG00000167202.11|0|9763	38	43.9211
ENSG00000233927.4|mRNA|RPS28|ENSG00000233927.4|ENSG00000233927.4|0|2119	38	39.3947
ENSG00000263809.1|mRNA|AC135178.2|ENSG00000263809.1|ENSG00000263809.1|0|3087	37	49.5405
ENSG00000125991.19|mRNA|ERGIC3|ENSG00000125991.19|ENSG00000125991.19|0|6012	37	40.0541
ENSG00000104973.16|mRNA|MED25|ENSG00000104973.16|ENSG00000104973.16|0|6120	37	59.9189
ENSG00000134419.15|mRNA|RPS15A|ENSG00000134419.15|ENSG00000134419.15|0|6679	36	57.8056
ENSG00000111144.9|mRNA|LTA4H|ENSG00000111144.9|ENSG00000111144.9|0|7350	36	45.4167
ENSG00000161970.12|mRNA|RPL26|ENSG00000161970.12|ENSG00000161970.12|0|2472	35	54.1143
ENSG00000026025.15|mRNA|VIM|ENSG00000026025.15|ENSG00000026025.15|0|5158	34	46.1471
ENSG00000198563.13|mRNA|DDX39B|ENSG00000198563.13|ENSG00000198563.13|0|7007	34	52.2941
ENSG00000198034.10|mRNA|RPS4X|ENSG00000198034.10|ENSG00000198034.10|0|2982	34	67.2941
ENSG00000254870.5|mRNA|ATP6V1G2-DDX39B|ENSG00000254870.5|ENSG00000254870.5|0|2372	33	53.9394
hsa_circ_0034517|circRNA|hsa_circ_0034517|hsa_circ_0034517|hsa_circ_0034517|0|600	32	67.1562
ENSG00000171863.12|mRNA|RPS7|ENSG00000171863.12|ENSG00000171863.12|0|5583	31	41.6774
ENSG00000245281.6|lncRNA|AC124242.1|ENSG00000245281.6|ENSG00000245281.6|0|1834	31	31.5161
ENSG00000182831.11|mRNA|C16orf72|ENSG00000182831.11|ENSG00000182831.11|0|15875	31	35.0645
ENSG00000063177.12|mRNA|RPL18|ENSG00000063177.12|ENSG00000063177.12|0|4209	31	56.6452
ENSG00000166441.12|mRNA|RPL27A|ENSG00000166441.12|ENSG00000166441.12|0|7193	30	49.4
ENSG00000164713.9|mRNA|BRI3|ENSG00000164713.9|ENSG00000164713.9|0|5139	30	56.8333
ENSG00000204628.11|mRNA|RACK1|ENSG00000204628.11|ENSG00000204628.11|0|5990	30	52.1333
ENSG00000105193.8|mRNA|RPS16|ENSG00000105193.8|ENSG00000105193.8|0|2603	30	58.3
ENSG00000242574.8|mRNA|HLA-DMB|ENSG00000242574.8|ENSG00000242574.8|0|4655	30	30
ENSG00000186468.12|mRNA|RPS23|ENSG00000186468.12|ENSG00000186468.12|0|4204	29	54.3103
ENSG00000130726.11|mRNA|TRIM28|ENSG00000130726.11|ENSG00000130726.11|0|4034	29	55.4483
ENSG00000112306.7|mRNA|RPS12|ENSG00000112306.7|ENSG00000112306.7|0|767	29	59.2414
ENSG00000114423.18|mRNA|CBLB|ENSG00000114423.18|ENSG00000114423.18|0|11840	29	37.1724
ENSG00000215021.8|mRNA|PHB2|ENSG00000215021.8|ENSG00000215021.8|0|2499	29	28.3793
ENSG00000184588.17|mRNA|PDE4B|ENSG00000184588.17|ENSG00000184588.17|0|8644	28	40.8571
ENSG00000178951.8|mRNA|ZBTB7A|ENSG00000178951.8|ENSG00000178951.8|0|5725	28	48.3571
ENSG00000167264.17|mRNA|DUS2|ENSG00000167264.17|ENSG00000167264.17|0|4472	28	38.7143
ENSG00000174748.18|mRNA|RPL15|ENSG00000174748.18|ENSG00000174748.18|0|6528	28	54.1429
ENSG00000148303.16|mRNA|RPL7A|ENSG00000148303.16|ENSG00000148303.16|0|2242	27	66.2222
ENSG00000255007.1|lncRNA|LINC02489|ENSG00000255007.1|ENSG00000255007.1|0|354	26	58.1538
ENSG00000148154.9|mRNA|UGCG|ENSG00000148154.9|ENSG00000148154.9|0|4615	26	40
ENSG00000110955.8|mRNA|ATP5B|ENSG00000110955.8|ENSG00000110955.8|0|2322	26	63.3077
ENSG00000145425.9|mRNA|RPS3A|ENSG00000145425.9|ENSG00000145425.9|0|2341	26	58.8077
hsa_circ_0009084|circRNA|hsa_circ_0009084|hsa_circ_0009084|hsa_circ_0009084|0|600	25	37.08
ENSG00000142937.11|mRNA|RPS8|ENSG00000142937.11|ENSG00000142937.11|0|2847	25	65.2
ENSG00000117091.9|mRNA|CD48|ENSG00000117091.9|ENSG00000117091.9|0|3274	25	63.12
ENSG00000156110.13|mRNA|ADK|ENSG00000156110.13|ENSG00000156110.13|0|3184	25	47
ENSG00000167526.13|mRNA|RPL13|ENSG00000167526.13|ENSG00000167526.13|0|6172	25	50.96
ENSG00000156709.13|mRNA|AIFM1|ENSG00000156709.13|ENSG00000156709.13|0|3306	25	38.44
ENSG00000122406.12|mRNA|RPL5|ENSG00000122406.12|ENSG00000122406.12|0|2890	24	56.75
ENSG00000148719.14|mRNA|DNAJB12|ENSG00000148719.14|ENSG00000148719.14|0|5649	24	53.1667
ENSG00000206596.1|snRNA|RNU1-27P|ENSG00000206596.1|ENSG00000206596.1|0|164	24	52.0833
ENSG00000114023.15|mRNA|FAM162A|ENSG00000114023.15|ENSG00000114023.15|0|3793	24	50
ENSG00000160752.14|mRNA|FDPS|ENSG00000160752.14|ENSG00000160752.14|0|3718	23	50.8261
ENSG00000243701.5|lncRNA|DUBR|ENSG00000243701.5|ENSG00000243701.5|0|4206	23	40.2174
ENSG00000173442.12|mRNA|EHBP1L1|ENSG00000173442.12|ENSG00000173442.12|0|6741	23	52.9565
ENSG00000115368.9|mRNA|WDR75|ENSG00000115368.9|ENSG00000115368.9|0|5066	22	53.0455
ENSG00000249209.2|mRNA|AP000311.1|ENSG00000249209.2|ENSG00000249209.2|0|1078	22	60.0455
ENSG00000136636.12|mRNA|KCTD3|ENSG00000136636.12|ENSG00000136636.12|0|4929	22	55.8636
ENSG00000138629.15|mRNA|UBL7|ENSG00000138629.15|ENSG00000138629.15|0|1885	22	71.0455
ENSG00000117280.12|mRNA|RAB29|ENSG00000117280.12|ENSG00000117280.12|0|3882	22	50.8182
ENSG00000114942.13|mRNA|EEF1B2|ENSG00000114942.13|ENSG00000114942.13|0|1915	21	66.3333
ENSG00000168906.12|mRNA|MAT2A|ENSG00000168906.12|ENSG00000168906.12|0|4487	21	48.0952
ENSG00000254979.5|mRNA|AP000781.2|ENSG00000254979.5|ENSG00000254979.5|0|2242	21	45
ENSG00000104408.9|mRNA|EIF3E|ENSG00000104408.9|ENSG00000104408.9|0|6005	21	51.3333
ENSG00000214517.9|mRNA|PPME1|ENSG00000214517.9|ENSG00000214517.9|0|7917	21	38.619
ENSG00000166685.11|mRNA|COG1|ENSG00000166685.11|ENSG00000166685.11|0|5317	21	47.3333
ENSG00000090621.13|mRNA|PABPC4|ENSG00000090621.13|ENSG00000090621.13|0|6782	21	47.2381
ENSG00000173221.13|mRNA|GLRX|ENSG00000173221.13|ENSG00000173221.13|0|6508	21	58.4286
ENSG00000103043.14|mRNA|VAC14|ENSG00000103043.14|ENSG00000103043.14|0|8276	20	59.35
ENSG00000167851.13|mRNA|CD300A|ENSG00000167851.13|ENSG00000167851.13|0|2686	20	56.25
ENSG00000101294.16|mRNA|HM13|ENSG00000101294.16|ENSG00000101294.16|0|10000	20	59.9
ENSG00000198168.8|mRNA|SVIP|ENSG00000198168.8|ENSG00000198168.8|0|5263	19	53.7368
ENSG00000104738.16|mRNA|MCM4|ENSG00000104738.16|ENSG00000104738.16|0|6824	19	40.1053
ENSG00000136699.19|mRNA|SMPD4|ENSG00000136699.19|ENSG00000136699.19|0|7375	19	44.7368
ENSG00000184220.11|mRNA|CMSS1|ENSG00000184220.11|ENSG00000184220.11|0|7210	19	43.5789
ENSG00000255448.1|lncRNA|AC055860.1|ENSG00000255448.1|ENSG00000255448.1|0|688	19	55.5263
ENSG00000161016.17|mRNA|RPL8|ENSG00000161016.17|ENSG00000161016.17|0|2159	18	54.9444
ENSG00000114391.12|mRNA|RPL24|ENSG00000114391.12|ENSG00000114391.12|0|2682	18	66.6111
ENSG00000226510.1|lncRNA|UPK1A-AS1|ENSG00000226510.1|ENSG00000226510.1|0|795	18	44.3333
ENSG00000270800.2|mRNA|RPS10-NUDT3|ENSG00000270800.2|ENSG00000270800.2|0|5018	18	63.9444
ENSG00000187446.11|mRNA|CHP1|ENSG00000187446.11|ENSG00000187446.11|0|3950	18	42.7778
ENSG00000084754.10|mRNA|HADHA|ENSG00000084754.10|ENSG00000084754.10|0|3811	18	63.5556
ENSG00000106799.12|mRNA|TGFBR1|ENSG00000106799.12|ENSG00000106799.12|0|6844	18	47.2778
ENSG00000081791.8|mRNA|KIAA0141|ENSG00000081791.8|ENSG00000081791.8|0|6047	17	52.8235
ENSG00000206588.1|snRNA|RNU1-28P|ENSG00000206588.1|ENSG00000206588.1|0|164	17	42.8235
ENSG00000075975.15|mRNA|MKRN2|ENSG00000075975.15|ENSG00000075975.15|0|2848	17	37.4706
ENSG00000280195.1|lncRNA|AC245140.2|ENSG00000280195.1|ENSG00000280195.1|0|1939	17	53.1765
ENSG00000240247.7|mRNA|DEFA1B|ENSG00000240247.7|ENSG00000240247.7|0|491	17	43.5882
ENSG00000172053.17|mRNA|QARS|ENSG00000172053.17|ENSG00000172053.17|0|4708	17	56.3529
ENSG00000147677.10|mRNA|EIF3H|ENSG00000147677.10|ENSG00000147677.10|0|6434	16	54.0625
ENSG00000265972.5|mRNA|TXNIP|ENSG00000265972.5|ENSG00000265972.5|0|3625	16	68.3125
ENSG00000181852.17|mRNA|RNF41|ENSG00000181852.17|ENSG00000181852.17|0|6537	16	57.25
ENSG00000104960.15|mRNA|PTOV1|ENSG00000104960.15|ENSG00000104960.15|0|5962	16	43.9375
ENSG00000169239.12|mRNA|CA5B|ENSG00000169239.12|ENSG00000169239.12|0|8520	16	37.0625
hsa_circ_0000509|circRNA|hsa_circ_0000509|hsa_circ_0000509|hsa_circ_0000509|0|600	16	24.4375
ENSG00000120913.23|mRNA|PDLIM2|ENSG00000120913.23|ENSG00000120913.23|0|12388	16	58.4375
ENSG00000136942.14|mRNA|RPL35|ENSG00000136942.14|ENSG00000136942.14|0|1535	16	59.9375
ENSG00000261840.2|lncRNA|AC093249.6|ENSG00000261840.2|ENSG00000261840.2|0|1148	16	19.1875
ENSG00000135605.12|mRNA|TEC|ENSG00000135605.12|ENSG00000135605.12|0|4030	16	38.4375
ENSG00000119636.15|mRNA|BBOF1|ENSG00000119636.15|ENSG00000119636.15|0|4620	16	32.5625
ENSG00000250634.5|lncRNA|LINC01182|ENSG00000250634.5|ENSG00000250634.5|0|2742	16	47.75
ENSG00000048392.11|mRNA|RRM2B|ENSG00000048392.11|ENSG00000048392.11|0|5548	15	48.8
ENSG00000175470.18|mRNA|PPP2R2D|ENSG00000175470.18|ENSG00000175470.18|0|7756	15	67.9333
ENSG00000139278.9|mRNA|GLIPR1|ENSG00000139278.9|ENSG00000139278.9|0|6273	15	58.6
ENSG00000130699.18|mRNA|TAF4|ENSG00000130699.18|ENSG00000130699.18|0|9808	15	57.1333
ENSG00000182180.13|mRNA|MRPS16|ENSG00000182180.13|ENSG00000182180.13|0|2794	15	36.8667
ENSG00000156127.6|mRNA|BATF|ENSG00000156127.6|ENSG00000156127.6|0|980	15	35.7333
ENSG00000162129.12|mRNA|CLPB|ENSG00000162129.12|ENSG00000162129.12|0|4264	15	63.3333
ENSG00000183049.12|mRNA|CAMK1D|ENSG00000183049.12|ENSG00000183049.12|0|8762	15	65.8
ENSG00000147168.12|mRNA|IL2RG|ENSG00000147168.12|ENSG00000147168.12|0|2760	15	45.4667
ENSG00000146278.10|mRNA|PNRC1|ENSG00000146278.10|ENSG00000146278.10|0|2992	15	55.4
ENSG00000172936.12|mRNA|MYD88|ENSG00000172936.12|ENSG00000172936.12|0|3989	15	71.7333
ENSG00000145191.12|mRNA|EIF2B5|ENSG00000145191.12|ENSG00000145191.12|0|5702	15	44.2
ENSG00000102007.10|mRNA|PLP2|ENSG00000102007.10|ENSG00000102007.10|0|1279	15	50.3333
ENSG00000074842.7|mRNA|MYDGF|ENSG00000074842.7|ENSG00000074842.7|0|1678	15	22.2667
ENSG00000123728.9|mRNA|RAP2C|ENSG00000123728.9|ENSG00000123728.9|0|4118	15	29.8
ENSG00000155465.18|mRNA|SLC7A7|ENSG00000155465.18|ENSG00000155465.18|0|5131	15	38.7333
ENSG00000185158.12|mRNA|LRRC37B|ENSG00000185158.12|ENSG00000185158.12|0|6281	15	46.9333
ENSG00000172500.12|mRNA|FIBP|ENSG00000172500.12|ENSG00000172500.12|0|3353	15	44.8
ENSG00000149273.14|mRNA|RPS3|ENSG00000149273.14|ENSG00000149273.14|0|5894	15	65.6667
ENSG00000008988.9|mRNA|RPS20|ENSG00000008988.9|ENSG00000008988.9|0|3002	15	65.8667
ENSG00000105993.14|mRNA|DNAJB6|ENSG00000105993.14|ENSG00000105993.14|0|14981	14	66.5
ENSG00000116649.9|mRNA|SRM|ENSG00000116649.9|ENSG00000116649.9|0|1898	14	70.5714
ENSG00000126749.14|mRNA|EMG1|ENSG00000126749.14|ENSG00000126749.14|0|5600	14	53.4286
ENSG00000116288.12|mRNA|PARK7|ENSG00000116288.12|ENSG00000116288.12|0|2397	14	49.9286
ENSG00000204287.13|mRNA|HLA-DRA|ENSG00000204287.13|ENSG00000204287.13|0|1280	14	43.8571
ENSG00000069248.11|mRNA|NUP133|ENSG00000069248.11|ENSG00000069248.11|0|6080	14	51.6429
ENSG00000198728.10|mRNA|LDB1|ENSG00000198728.10|ENSG00000198728.10|0|2790	14	45.3571
ENSG00000163541.11|mRNA|SUCLG1|ENSG00000163541.11|ENSG00000163541.11|0|4286	14	51.5714
ENSG00000070610.14|mRNA|GBA2|ENSG00000070610.14|ENSG00000070610.14|0|4803	14	26.7857
ENSG00000172732.11|mRNA|MUS81|ENSG00000172732.11|ENSG00000172732.11|0|5476	14	50.9286
ENSG00000260342.2|mRNA|AC138811.2|ENSG00000260342.2|ENSG00000260342.2|0|764	14	76.8571
ENSG00000176986.15|mRNA|SEC24C|ENSG00000176986.15|ENSG00000176986.15|0|5341	14	71.9286
ENSG00000089157.15|mRNA|RPLP0|ENSG00000089157.15|ENSG00000089157.15|0|4001	14	56.2143
ENSG00000141551.14|mRNA|CSNK1D|ENSG00000141551.14|ENSG00000141551.14|0|11024	13	43
ENSG00000169224.12|mRNA|GCSAML|ENSG00000169224.12|ENSG00000169224.12|0|4680	13	57.0769
ENSG00000164935.6|mRNA|DCSTAMP|ENSG00000164935.6|ENSG00000164935.6|0|2778	13	40.6923
ENSG00000066135.12|mRNA|KDM4A|ENSG00000066135.12|ENSG00000066135.12|0|5172	13	45.7692
ENSG00000162639.15|mRNA|HENMT1|ENSG00000162639.15|ENSG00000162639.15|0|2426	13	51.6154
ENSG00000115461.4|mRNA|IGFBP5|ENSG00000115461.4|ENSG00000115461.4|0|6442	13	45
ENSG00000170430.9|mRNA|MGMT|ENSG00000170430.9|ENSG00000170430.9|0|3557	13	54.5385
ENSG00000198856.12|mRNA|OSTC|ENSG00000198856.12|ENSG00000198856.12|0|1617	13	50.6154
ENSG00000250479.8|mRNA|CHCHD10|ENSG00000250479.8|ENSG00000250479.8|0|1360	13	65.3846
ENSG00000160213.6|mRNA|CSTB|ENSG00000160213.6|ENSG00000160213.6|0|3935	13	57
ENSG00000086475.14|mRNA|SEPHS1|ENSG00000086475.14|ENSG00000086475.14|0|3888	13	41.8462
ENSG00000119522.16|mRNA|DENND1A|ENSG00000119522.16|ENSG00000119522.16|0|10256	13	54.0769
ENSG00000241837.6|mRNA|ATP5O|ENSG00000241837.6|ENSG00000241837.6|0|3336	13	63.6923
hsa_circ_0057024|circRNA|hsa_circ_0057024|hsa_circ_0057024|hsa_circ_0057024|0|600	13	55.6154
ENSG00000196743.8|mRNA|GM2A|ENSG00000196743.8|ENSG00000196743.8|0|4479	13	32.3077
ENSG00000006530.15|mRNA|AGK|ENSG00000006530.15|ENSG00000006530.15|0|6547	13	57.1538
ENSG00000124702.17|mRNA|KLHDC3|ENSG00000124702.17|ENSG00000124702.17|0|2019	12	52.6667
ENSG00000128052.8|mRNA|KDR|ENSG00000128052.8|ENSG00000128052.8|0|6259	12	75.8333
ENSG00000065427.14|mRNA|KARS|ENSG00000065427.14|ENSG00000065427.14|0|4065	12	57
ENSG00000163608.14|mRNA|NEPRO|ENSG00000163608.14|ENSG00000163608.14|0|6494	12	53.0833
ENSG00000169592.14|mRNA|INO80E|ENSG00000169592.14|ENSG00000169592.14|0|6076	12	54.6667
ENSG00000130741.10|mRNA|EIF2S3|ENSG00000130741.10|ENSG00000130741.10|0|3472	12	64.25
ENSG00000198755.10|mRNA|RPL10A|ENSG00000198755.10|ENSG00000198755.10|0|1501	12	69.0833
ENSG00000162817.6|mRNA|C1orf115|ENSG00000162817.6|ENSG00000162817.6|0|3413	12	69.75
ENSG00000231500.6|mRNA|RPS18|ENSG00000231500.6|ENSG00000231500.6|0|1898	12	65.1667
ENSG00000108256.8|mRNA|NUFIP2|ENSG00000108256.8|ENSG00000108256.8|0|10850	12	53
ENSG00000181038.13|mRNA|METTL23|ENSG00000181038.13|ENSG00000181038.13|0|1914	12	45.1667
ENSG00000171700.13|mRNA|RGS19|ENSG00000171700.13|ENSG00000171700.13|0|2028	12	34.4167
ENSG00000189403.14|mRNA|HMGB1|ENSG00000189403.14|ENSG00000189403.14|0|7723	12	46.5833
ENSG00000185201.16|mRNA|IFITM2|ENSG00000185201.16|ENSG00000185201.16|0|1543	12	69.3333
hsa_circ_0007644|circRNA|hsa_circ_0007644|hsa_circ_0007644|hsa_circ_0007644|0|470	12	52.9167
ENSG00000072210.18|mRNA|ALDH3A2|ENSG00000072210.18|ENSG00000072210.18|0|6457	12	49.5
ENSG00000028137.18|mRNA|TNFRSF1B|ENSG00000028137.18|ENSG00000028137.18|0|3766	12	42
ENSG00000120438.11|mRNA|TCP1|ENSG00000120438.11|ENSG00000120438.11|0|4929	12	42.8333
ENSG00000204387.12|mRNA|C6orf48|ENSG00000204387.12|ENSG00000204387.12|0|1801	12	57.4167
ENSG00000105640.12|mRNA|RPL18A|ENSG00000105640.12|ENSG00000105640.12|0|3527	11	48.5455
hsa_circ_0028670|circRNA|hsa_circ_0028670|hsa_circ_0028670|hsa_circ_0028670|0|600	11	56.2727
ENSG00000279444.1|lncRNA|AC135584.1|ENSG00000279444.1|ENSG00000279444.1|0|333	11	47.7273
ENSG00000163554.12|mRNA|SPTA1|ENSG00000163554.12|ENSG00000163554.12|0|10025	11	45.4545
ENSG00000162551.13|mRNA|ALPL|ENSG00000162551.13|ENSG00000162551.13|0|3007	11	69.1818
ENSG00000136933.16|mRNA|RABEPK|ENSG00000136933.16|ENSG00000136933.16|0|3401	11	72.9091
ENSG00000271320.1|lncRNA|AC091488.1|ENSG00000271320.1|ENSG00000271320.1|0|660	11	40.6364
ENSG00000141568.20|mRNA|FOXK2|ENSG00000141568.20|ENSG00000141568.20|0|9991	11	28.7273
ENSG00000142676.12|mRNA|RPL11|ENSG00000142676.12|ENSG00000142676.12|0|1987	11	66.7273
ENSG00000125691.12|mRNA|RPL23|ENSG00000125691.12|ENSG00000125691.12|0|5979	11	39.8182
ENSG00000264707.1|lncRNA|L3MBTL4-AS1|ENSG00000264707.1|ENSG00000264707.1|0|2044	11	70.2727
ENSG00000143344.15|mRNA|RGL1|ENSG00000143344.15|ENSG00000143344.15|0|5305	11	46.5455
ENSG00000143546.9|mRNA|S100A8|ENSG00000143546.9|ENSG00000143546.9|0|1006	11	45.7273
ENSG00000122545.18|mRNA|SEPT7|ENSG00000122545.18|ENSG00000122545.18|0|10906	11	47.3636
ENSG00000122026.10|mRNA|RPL21|ENSG00000122026.10|ENSG00000122026.10|0|2249	11	58.9091
ENSG00000145741.15|mRNA|BTF3|ENSG00000145741.15|ENSG00000145741.15|0|2467	11	49.3636
ENSG00000120727.12|mRNA|PAIP2|ENSG00000120727.12|ENSG00000120727.12|0|3158	11	31.0909
ENSG00000120708.16|mRNA|TGFBI|ENSG00000120708.16|ENSG00000120708.16|0|7810	11	48
ENSG00000151948.11|mRNA|GLT1D1|ENSG00000151948.11|ENSG00000151948.11|0|3478	11	30.5455
ENSG00000116809.11|mRNA|ZBTB17|ENSG00000116809.11|ENSG00000116809.11|0|4240	11	64
ENSG00000160410.14|mRNA|SHKBP1|ENSG00000160410.14|ENSG00000160410.14|0|3936	11	34.8182
ENSG00000275688.4|mRNA|CCL15-CCL14|ENSG00000275688.4|ENSG00000275688.4|0|1047	11	71.4545
ENSG00000148672.8|mRNA|GLUD1|ENSG00000148672.8|ENSG00000148672.8|0|3519	11	58.6364
ENSG00000000938.12|mRNA|FGR|ENSG00000000938.12|ENSG00000000938.12|0|3474	11	63
hsa_circ_0073526|circRNA|hsa_circ_0073526|hsa_circ_0073526|hsa_circ_0073526|0|600	11	42.3636
ENSG00000135749.18|mRNA|PCNX2|ENSG00000135749.18|ENSG00000135749.18|0|13815	10	53.9
ENSG00000215301.9|mRNA|DDX3X|ENSG00000215301.9|ENSG00000215301.9|0|8928	10	44.6
ENSG00000164654.15|mRNA|MIOS|ENSG00000164654.15|ENSG00000164654.15|0|6714	10	58.2
ENSG00000101190.12|mRNA|TCFL5|ENSG00000101190.12|ENSG00000101190.12|0|3436	10	49.6
ENSG00000007001.12|mRNA|UPP2|ENSG00000007001.12|ENSG00000007001.12|0|2957	10	48.9
ENSG00000118579.12|mRNA|MED28|ENSG00000118579.12|ENSG00000118579.12|0|10982	10	40.8
ENSG00000269028.3|mRNA|MTRNR2L12|ENSG00000269028.3|ENSG00000269028.3|0|1049	10	46.7
ENSG00000239900.12|mRNA|ADSL|ENSG00000239900.12|ENSG00000239900.12|0|7111	10	50.4
ENSG00000138378.17|mRNA|STAT4|ENSG00000138378.17|ENSG00000138378.17|0|4250	10	77.9
ENSG00000110031.12|mRNA|LPXN|ENSG00000110031.12|ENSG00000110031.12|0|2467	10	56.7
ENSG00000278845.4|mRNA|MRPL45|ENSG00000278845.4|ENSG00000278845.4|0|1705	10	57.9
hsa_circ_0084021|circRNA|hsa_circ_0084021|hsa_circ_0084021|hsa_circ_0084021|0|294	10	49.2
ENSG00000255478.1|lncRNA|AP000944.1|ENSG00000255478.1|ENSG00000255478.1|0|564	10	53.8
hsa_circ_0071101|circRNA|hsa_circ_0071101|hsa_circ_0071101|hsa_circ_0071101|0|600	10	25.4
ENSG00000226102.3|pseudogene|SEPT7P3|ENSG00000226102.3|ENSG00000226102.3|0|621	10	29.9
ENSG00000133818.13|mRNA|RRAS2|ENSG00000133818.13|ENSG00000133818.13|0|3453	10	47.7
ENSG00000113638.13|mRNA|TTC33|ENSG00000113638.13|ENSG00000113638.13|0|6821	10	33.4
ENSG00000214026.10|mRNA|MRPL23|ENSG00000214026.10|ENSG00000214026.10|0|2975	10	63.1
ENSG00000197958.12|mRNA|RPL12|ENSG00000197958.12|ENSG00000197958.12|0|2452	10	70.6
ENSG00000070761.7|mRNA|CFAP20|ENSG00000070761.7|ENSG00000070761.7|0|2375	10	48.8
ENSG00000254975.1|lncRNA|AP001189.4|ENSG00000254975.1|ENSG00000254975.1|0|452	10	61.7
ENSG00000162231.13|mRNA|NXF1|ENSG00000162231.13|ENSG00000162231.13|0|6194	10	41.5
ENSG00000110777.11|mRNA|POU2AF1|ENSG00000110777.11|ENSG00000110777.11|0|7416	10	57.5
ENSG00000253773.2|lncRNA|C8orf37-AS1|ENSG00000253773.2|ENSG00000253773.2|0|1445	10	41.3
ENSG00000012124.16|mRNA|CD22|ENSG00000012124.16|ENSG00000012124.16|0|6159	10	47.1
ENSG00000154359.12|mRNA|LONRF1|ENSG00000154359.12|ENSG00000154359.12|0|5685	9	23.3333
ENSG00000197771.12|mRNA|MCMBP|ENSG00000197771.12|ENSG00000197771.12|0|6000	9	61
ENSG00000160908.14|mRNA|ZNF394|ENSG00000160908.14|ENSG00000160908.14|0|3505	9	65.4444
ENSG00000065150.18|mRNA|IPO5|ENSG00000065150.18|ENSG00000065150.18|0|9671	9	41.5556
ENSG00000115993.12|mRNA|TRAK2|ENSG00000115993.12|ENSG00000115993.12|0|7595	9	53.2222
ENSG00000156983.15|mRNA|BRPF1|ENSG00000156983.15|ENSG00000156983.15|0|5477	9	72.2222
ENSG00000145287.10|mRNA|PLAC8|ENSG00000145287.10|ENSG00000145287.10|0|3853	9	46.1111
ENSG00000163754.17|mRNA|GYG1|ENSG00000163754.17|ENSG00000163754.17|0|3511	9	66
ENSG00000115875.18|mRNA|SRSF7|ENSG00000115875.18|ENSG00000115875.18|0|4045	9	52.1111
ENSG00000163584.17|mRNA|RPL22L1|ENSG00000163584.17|ENSG00000163584.17|0|2326	9	55.7778
ENSG00000079841.18|mRNA|RIMS1|ENSG00000079841.18|ENSG00000079841.18|0|12788	9	42.1111
ENSG00000149823.8|mRNA|VPS51|ENSG00000149823.8|ENSG00000149823.8|0|4878	9	66.6667
ENSG00000110092.3|mRNA|CCND1|ENSG00000110092.3|ENSG00000110092.3|0|4830	9	54.3333
hsa_circ_0018889|circRNA|hsa_circ_0018889|hsa_circ_0018889|hsa_circ_0018889|0|558	9	46.5556
ENSG00000143353.11|mRNA|LYPLAL1|ENSG00000143353.11|ENSG00000143353.11|0|2966	9	23.7778
ENSG00000075239.13|mRNA|ACAT1|ENSG00000075239.13|ENSG00000075239.13|0|5584	9	43.1111
ENSG00000150768.15|mRNA|DLAT|ENSG00000150768.15|ENSG00000150768.15|0|4831	9	62.1111
ENSG00000159128.14|mRNA|IFNGR2|ENSG00000159128.14|ENSG00000159128.14|0|2960	9	73.5556
ENSG00000172159.15|mRNA|FRMD3|ENSG00000172159.15|ENSG00000172159.15|0|6486	9	55.4444
ENSG00000089159.16|mRNA|PXN|ENSG00000089159.16|ENSG00000089159.16|0|7460	9	69.7778
ENSG00000100575.13|mRNA|TIMM9|ENSG00000100575.13|ENSG00000100575.13|0|1500	9	76.4444
ENSG00000132386.10|mRNA|SERPINF1|ENSG00000132386.10|ENSG00000132386.10|0|3069	9	36.8889
ENSG00000171862.10|mRNA|PTEN|ENSG00000171862.10|ENSG00000171862.10|0|11581	9	58.1111
ENSG00000134905.16|mRNA|CARS2|ENSG00000134905.16|ENSG00000134905.16|0|10460	9	48.3333
ENSG00000236304.1|lncRNA|AP001189.1|ENSG00000236304.1|ENSG00000236304.1|0|1426	9	39.3333
ENSG00000044574.7|mRNA|HSPA5|ENSG00000044574.7|ENSG00000044574.7|0|3908	9	54.7778
ENSG00000239839.6|mRNA|DEFA3|ENSG00000239839.6|ENSG00000239839.6|0|498	9	59
ENSG00000213347.10|mRNA|MXD3|ENSG00000213347.10|ENSG00000213347.10|0|5154	9	52.1111
hsa_circ_0030608|circRNA|hsa_circ_0030608|hsa_circ_0030608|hsa_circ_0030608|0|600	9	67.2222
ENSG00000100353.17|mRNA|EIF3D|ENSG00000100353.17|ENSG00000100353.17|0|4070	9	58.2222
ENSG00000134759.13|mRNA|ELP2|ENSG00000134759.13|ENSG00000134759.13|0|11068	9	71.7778
ENSG00000095485.17|mRNA|CWF19L1|ENSG00000095485.17|ENSG00000095485.17|0|3985	9	64.3333
ENSG00000173457.10|mRNA|PPP1R14B|ENSG00000173457.10|ENSG00000173457.10|0|1655	9	48
ENSG00000136193.16|mRNA|SCRN1|ENSG00000136193.16|ENSG00000136193.16|0|6046	9	67.8889
ENSG00000184014.7|mRNA|DENND5A|ENSG00000184014.7|ENSG00000184014.7|0|8648	8	56
ENSG00000117448.13|mRNA|AKR1A1|ENSG00000117448.13|ENSG00000117448.13|0|3121	8	43.75
ENSG00000073756.11|mRNA|PTGS2|ENSG00000073756.11|ENSG00000073756.11|0|5269	8	43.25
ENSG00000283900.1|mRNA|Z98749.3|ENSG00000283900.1|ENSG00000283900.1|0|1770	8	40.875
ENSG00000189067.12|mRNA|LITAF|ENSG00000189067.12|ENSG00000189067.12|0|5060	8	44.125
ENSG00000158321.15|mRNA|AUTS2|ENSG00000158321.15|ENSG00000158321.15|0|10420	8	64.75
ENSG00000131495.8|mRNA|NDUFA2|ENSG00000131495.8|ENSG00000131495.8|0|1488	8	77
ENSG00000158864.12|mRNA|NDUFS2|ENSG00000158864.12|ENSG00000158864.12|0|3658	8	49.75
ENSG00000253227.1|lncRNA|AC090192.2|ENSG00000253227.1|ENSG00000253227.1|0|553	8	48.875
hsa_circ_0003463|circRNA|hsa_circ_0003463|hsa_circ_0003463|hsa_circ_0003463|0|600	8	24
ENSG00000121316.10|mRNA|PLBD1|ENSG00000121316.10|ENSG00000121316.10|0|2841	8	55.625
hsa_circ_0052525|circRNA|hsa_circ_0052525|hsa_circ_0052525|hsa_circ_0052525|0|524	8	46.125
ENSG00000140943.16|mRNA|MBTPS1|ENSG00000140943.16|ENSG00000140943.16|0|10238	8	57.25
ENSG00000091483.6|mRNA|FH|ENSG00000091483.6|ENSG00000091483.6|0|2142	8	69
ENSG00000149557.12|mRNA|FEZ1|ENSG00000149557.12|ENSG00000149557.12|0|5937	8	78.125
ENSG00000115268.9|mRNA|RPS15|ENSG00000115268.9|ENSG00000115268.9|0|2137	8	66.5
ENSG00000076662.9|mRNA|ICAM3|ENSG00000076662.9|ENSG00000076662.9|0|2950	8	67.125
ENSG00000136715.17|mRNA|SAP130|ENSG00000136715.17|ENSG00000136715.17|0|4373	8	52.875
ENSG00000080200.9|mRNA|CRYBG3|ENSG00000080200.9|ENSG00000080200.9|0|10929	8	50.5
ENSG00000183401.11|mRNA|CCDC159|ENSG00000183401.11|ENSG00000183401.11|0|4064	8	62.375
ENSG00000138617.14|mRNA|PARP16|ENSG00000138617.14|ENSG00000138617.14|0|3715	8	71.75
ENSG00000144824.20|mRNA|PHLDB2|ENSG00000144824.20|ENSG00000144824.20|0|12309	8	46.375
ENSG00000140264.19|mRNA|SERF2|ENSG00000140264.19|ENSG00000140264.19|0|7347	8	33.875
ENSG00000181929.11|mRNA|PRKAG1|ENSG00000181929.11|ENSG00000181929.11|0|4556	8	60.375
hsa_circ_0007277|circRNA|hsa_circ_0007277|hsa_circ_0007277|hsa_circ_0007277|0|600	8	35.5
ENSG00000126561.16|mRNA|STAT5A|ENSG00000126561.16|ENSG00000126561.16|0|5754	8	64.625
ENSG00000102978.12|mRNA|POLR2C|ENSG00000102978.12|ENSG00000102978.12|0|3940	8	52.5
ENSG00000175029.16|mRNA|CTBP2|ENSG00000175029.16|ENSG00000175029.16|0|10946	8	70.375
ENSG00000165672.6|mRNA|PRDX3|ENSG00000165672.6|ENSG00000165672.6|0|3417	8	60.375
ENSG00000165283.15|mRNA|STOML2|ENSG00000165283.15|ENSG00000165283.15|0|1806	8	64.25
ENSG00000165233.17|mRNA|CARD19|ENSG00000165233.17|ENSG00000165233.17|0|3081	8	73.625
ENSG00000162636.15|mRNA|FAM102B|ENSG00000162636.15|ENSG00000162636.15|0|9355	8	46.5
ENSG00000163161.12|mRNA|ERCC3|ENSG00000163161.12|ENSG00000163161.12|0|7401	8	79.75
ENSG00000173960.13|mRNA|UBXN2A|ENSG00000173960.13|ENSG00000173960.13|0|6882	8	41.125
ENSG00000103510.19|mRNA|KAT8|ENSG00000103510.19|ENSG00000103510.19|0|4334	8	73.5
ENSG00000106803.9|mRNA|SEC61B|ENSG00000106803.9|ENSG00000106803.9|0|1190	8	58
hsa_circ_0027033|circRNA|hsa_circ_0027033|hsa_circ_0027033|hsa_circ_0027033|0|600	8	83.875
ENSG00000173660.11|mRNA|UQCRH|ENSG00000173660.11|ENSG00000173660.11|0|1408	8	39.625
ENSG00000167470.12|mRNA|MIDN|ENSG00000167470.12|ENSG00000167470.12|0|4492	8	65
ENSG00000111796.3|mRNA|KLRB1|ENSG00000111796.3|ENSG00000111796.3|0|1448	8	68.75
ENSG00000203747.10|mRNA|FCGR3A|ENSG00000203747.10|ENSG00000203747.10|0|2958	8	66.625
ENSG00000163755.8|mRNA|HPS3|ENSG00000163755.8|ENSG00000163755.8|0|6256	8	56.625
ENSG00000115919.14|mRNA|KYNU|ENSG00000115919.14|ENSG00000115919.14|0|17600	7	60.2857
ENSG00000137509.10|mRNA|PRCP|ENSG00000137509.10|ENSG00000137509.10|0|12798	7	48.4286
ENSG00000018189.12|mRNA|RUFY3|ENSG00000018189.12|ENSG00000018189.12|0|8070	7	40
ENSG00000081154.11|mRNA|PCNP|ENSG00000081154.11|ENSG00000081154.11|0|3102	7	55.2857
ENSG00000008018.8|mRNA|PSMB1|ENSG00000008018.8|ENSG00000008018.8|0|2256	7	42.2857
ENSG00000085760.14|mRNA|MTIF2|ENSG00000085760.14|ENSG00000085760.14|0|3374	7	51.1429
ENSG00000228215.2|lncRNA|AL954650.1|ENSG00000228215.2|ENSG00000228215.2|0|2051	7	61.4286
ENSG00000144645.13|mRNA|OSBPL10|ENSG00000144645.13|ENSG00000144645.13|0|11976	7	49
ENSG00000198829.6|mRNA|SUCNR1|ENSG00000198829.6|ENSG00000198829.6|0|4181	7	57.5714
ENSG00000262919.7|mRNA|FAM58A|ENSG00000262919.7|ENSG00000262919.7|0|1730	7	85
ENSG00000140740.10|mRNA|UQCRC2|ENSG00000140740.10|ENSG00000140740.10|0|5217	7	73.5714
ENSG00000083845.8|mRNA|RPS5|ENSG00000083845.8|ENSG00000083845.8|0|3617	7	81.8571
ENSG00000143486.15|mRNA|EIF2D|ENSG00000143486.15|ENSG00000143486.15|0|8064	7	61.2857
ENSG00000108344.14|mRNA|PSMD3|ENSG00000108344.14|ENSG00000108344.14|0|4964	7	66.8571
ENSG00000141504.11|mRNA|SAT2|ENSG00000141504.11|ENSG00000141504.11|0|1643	7	69.5714
ENSG00000002586.18|mRNA|CD99|ENSG00000002586.18|ENSG00000002586.18|0|3284	7	43.7143
ENSG00000109814.11|mRNA|UGDH|ENSG00000109814.11|ENSG00000109814.11|0|4045	7	46.7143
ENSG00000142197.12|mRNA|DOPEY2|ENSG00000142197.12|ENSG00000142197.12|0|9030	7	61.4286
ENSG00000169299.13|mRNA|PGM2|ENSG00000169299.13|ENSG00000169299.13|0|3704	7	50.7143
ENSG00000251636.1|lncRNA|LINC01218|ENSG00000251636.1|ENSG00000251636.1|0|481	7	36.5714
ENSG00000189326.4|mRNA|SPANXN4|ENSG00000189326.4|ENSG00000189326.4|0|625	7	57.4286
hsa_circ_0060606|circRNA|hsa_circ_0060606|hsa_circ_0060606|hsa_circ_0060606|0|588	7	48.7143
ENSG00000174917.8|mRNA|C19orf70|ENSG00000174917.8|ENSG00000174917.8|0|1854	7	36.5714
ENSG00000168172.8|mRNA|HOOK3|ENSG00000168172.8|ENSG00000168172.8|0|15250	7	42
ENSG00000211460.11|mRNA|TSN|ENSG00000211460.11|ENSG00000211460.11|0|4407	7	49.1429
ENSG00000034677.12|mRNA|RNF19A|ENSG00000034677.12|ENSG00000034677.12|0|6031	7	65.2857
ENSG00000127507.17|mRNA|ADGRE2|ENSG00000127507.17|ENSG00000127507.17|0|8622	7	44.2857
ENSG00000203710.10|mRNA|CR1|ENSG00000203710.10|ENSG00000203710.10|0|11465	7	44.5714
ENSG00000100422.13|mRNA|CERK|ENSG00000100422.13|ENSG00000100422.13|0|4938	7	46.5714
hsa_circ_0036252|circRNA|hsa_circ_0036252|hsa_circ_0036252|hsa_circ_0036252|0|534	6	62.5
ENSG00000125676.19|mRNA|THOC2|ENSG00000125676.19|ENSG00000125676.19|0|10277	6	44
ENSG00000104763.18|mRNA|ASAH1|ENSG00000104763.18|ENSG00000104763.18|0|15378	6	61.3333
ENSG00000132603.13|mRNA|NIP7|ENSG00000132603.13|ENSG00000132603.13|0|3274	6	58.6667
ENSG00000011052.21|mRNA|NME1-NME2|ENSG00000011052.21|ENSG00000011052.21|0|1241	6	54
ENSG00000100227.17|mRNA|POLDIP3|ENSG00000100227.17|ENSG00000100227.17|0|3650	6	59.1667
ENSG00000047932.13|mRNA|GOPC|ENSG00000047932.13|ENSG00000047932.13|0|4628	6	63
ENSG00000140280.13|mRNA|LYSMD2|ENSG00000140280.13|ENSG00000140280.13|0|2074	6	75.1667
ENSG00000100347.14|mRNA|SAMM50|ENSG00000100347.14|ENSG00000100347.14|0|6435	6	80.8333
ENSG00000142534.6|mRNA|RPS11|ENSG00000142534.6|ENSG00000142534.6|0|1390	6	56
ENSG00000105643.9|mRNA|ARRDC2|ENSG00000105643.9|ENSG00000105643.9|0|4637	6	74.1667
ENSG00000092098.16|mRNA|RNF31|ENSG00000092098.16|ENSG00000092098.16|0|4982	6	42
ENSG00000138095.18|mRNA|LRPPRC|ENSG00000138095.18|ENSG00000138095.18|0|9760	6	49
ENSG00000049247.13|mRNA|UTS2|ENSG00000049247.13|ENSG00000049247.13|0|1791	6	39
ENSG00000134851.12|mRNA|TMEM165|ENSG00000134851.12|ENSG00000134851.12|0|7045	6	63
ENSG00000166387.11|mRNA|PPFIBP2|ENSG00000166387.11|ENSG00000166387.11|0|9617	6	60.8333
ENSG00000183726.10|mRNA|TMEM50A|ENSG00000183726.10|ENSG00000183726.10|0|3410	6	52
ENSG00000206573.8|lncRNA|THUMPD3-AS1|ENSG00000206573.8|ENSG00000206573.8|0|6275	6	49.8333
ENSG00000182979.17|mRNA|MTA1|ENSG00000182979.17|ENSG00000182979.17|0|6966	6	56
ENSG00000272398.5|mRNA|CD24|ENSG00000272398.5|ENSG00000272398.5|0|3097	6	50.6667
ENSG00000135272.10|mRNA|MDFIC|ENSG00000135272.10|ENSG00000135272.10|0|5252	6	50.1667
ENSG00000196459.13|mRNA|TRAPPC2|ENSG00000196459.13|ENSG00000196459.13|0|6107	6	56.3333
ENSG00000167508.11|mRNA|MVD|ENSG00000167508.11|ENSG00000167508.11|0|4717	6	56.6667
ENSG00000167645.16|mRNA|YIF1B|ENSG00000167645.16|ENSG00000167645.16|0|3193	6	45
ENSG00000250961.1|lncRNA|AC025470.2|ENSG00000250961.1|ENSG00000250961.1|0|897	6	72.3333
hsa_circ_0007795|circRNA|hsa_circ_0007795|hsa_circ_0007795|hsa_circ_0007795|0|600	6	70.6667
ENSG00000145919.10|mRNA|BOD1|ENSG00000145919.10|ENSG00000145919.10|0|2018	6	61
ENSG00000159377.10|mRNA|PSMB4|ENSG00000159377.10|ENSG00000159377.10|0|2158	6	45.8333
ENSG00000111859.16|mRNA|NEDD9|ENSG00000111859.16|ENSG00000111859.16|0|10359	6	59
ENSG00000070756.15|mRNA|PABPC1|ENSG00000070756.15|ENSG00000070756.15|0|4752	6	74.5
ENSG00000254877.1|pseudogene|AP001636.2|ENSG00000254877.1|ENSG00000254877.1|0|696	6	43.3333
ENSG00000162946.21|mRNA|DISC1|ENSG00000162946.21|ENSG00000162946.21|0|12906	6	41
ENSG00000198700.9|mRNA|IPO9|ENSG00000198700.9|ENSG00000198700.9|0|11915	6	61.6667
ENSG00000114446.4|mRNA|IFT57|ENSG00000114446.4|ENSG00000114446.4|0|3766	6	73.8333
ENSG00000225972.1|pseudogene|MTND1P23|ENSG00000225972.1|ENSG00000225972.1|0|372	6	19.6667
ENSG00000151151.5|mRNA|IPMK|ENSG00000151151.5|ENSG00000151151.5|0|6133	6	49.3333
ENSG00000163516.13|mRNA|ANKZF1|ENSG00000163516.13|ENSG00000163516.13|0|6119	6	46.1667
ENSG00000077150.18|mRNA|NFKB2|ENSG00000077150.18|ENSG00000077150.18|0|4484	6	50.6667
ENSG00000224846.2|lncRNA|AL133351.1|ENSG00000224846.2|ENSG00000224846.2|0|539	6	31.6667
ENSG00000259033.1|lncRNA|AL356804.1|ENSG00000259033.1|ENSG00000259033.1|0|448	6	40.8333
ENSG00000115594.11|mRNA|IL1R1|ENSG00000115594.11|ENSG00000115594.11|0|7083	6	61.1667
ENSG00000163479.13|mRNA|SSR2|ENSG00000163479.13|ENSG00000163479.13|0|6651	6	59.6667
ENSG00000108591.9|mRNA|DRG2|ENSG00000108591.9|ENSG00000108591.9|0|7411	6	66.3333
ENSG00000243678.11|mRNA|NME2|ENSG00000243678.11|ENSG00000243678.11|0|2632	6	58.5
ENSG00000197776.7|mRNA|KLHDC1|ENSG00000197776.7|ENSG00000197776.7|0|3006	6	36.5
ENSG00000163694.14|mRNA|RBM47|ENSG00000163694.14|ENSG00000163694.14|0|8544	5	75.6
ENSG00000228335.1|pseudogene|AC073063.1|ENSG00000228335.1|ENSG00000228335.1|0|607	5	36.4
ENSG00000134802.17|mRNA|SLC43A3|ENSG00000134802.17|ENSG00000134802.17|0|4517	5	58.8
ENSG00000152234.15|mRNA|ATP5A1|ENSG00000152234.15|ENSG00000152234.15|0|10908	5	58.8
ENSG00000153879.8|mRNA|CEBPG|ENSG00000153879.8|ENSG00000153879.8|0|4411	5	51.2
ENSG00000134698.10|mRNA|AGO4|ENSG00000134698.10|ENSG00000134698.10|0|7267	5	62
ENSG00000234425.1|lncRNA|AL138930.1|ENSG00000234425.1|ENSG00000234425.1|0|635	5	56.8
ENSG00000243317.7|mRNA|C7orf73|ENSG00000243317.7|ENSG00000243317.7|0|4930	5	29.2
ENSG00000134333.13|mRNA|LDHA|ENSG00000134333.13|ENSG00000134333.13|0|6210	5	84.2
hsa_circ_0084874|circRNA|hsa_circ_0084874|hsa_circ_0084874|hsa_circ_0084874|0|568	5	45.2
ENSG00000162813.17|mRNA|BPNT1|ENSG00000162813.17|ENSG00000162813.17|0|3113	5	49.6
ENSG00000073861.2|mRNA|TBX21|ENSG00000073861.2|ENSG00000073861.2|0|2614	5	56.6
ENSG00000143179.14|mRNA|UCK2|ENSG00000143179.14|ENSG00000143179.14|0|6756	5	63
ENSG00000151883.17|mRNA|PARP8|ENSG00000151883.17|ENSG00000151883.17|0|10056	5	62
ENSG00000073331.17|mRNA|ALPK1|ENSG00000073331.17|ENSG00000073331.17|0|12325	5	39.6
ENSG00000156675.15|mRNA|RAB11FIP1|ENSG00000156675.15|ENSG00000156675.15|0|9602	5	45
ENSG00000226476.3|lncRNA|LINC01748|ENSG00000226476.3|ENSG00000226476.3|0|10622	5	49.8
ENSG00000161929.14|mRNA|SCIMP|ENSG00000161929.14|ENSG00000161929.14|0|4208	5	49.4
ENSG00000170445.12|mRNA|HARS|ENSG00000170445.12|ENSG00000170445.12|0|8436	5	61
ENSG00000171433.11|mRNA|GLOD5|ENSG00000171433.11|ENSG00000171433.11|0|1061	5	34.8
ENSG00000229604.2|pseudogene|MTATP8P2|ENSG00000229604.2|ENSG00000229604.2|0|202	5	55.6
ENSG00000009780.15|mRNA|FAM76A|ENSG00000009780.15|ENSG00000009780.15|0|4034	5	65.8
ENSG00000127804.12|mRNA|METTL16|ENSG00000127804.12|ENSG00000127804.12|0|8934	5	49.6
ENSG00000180712.3|lncRNA|LINC02363|ENSG00000180712.3|ENSG00000180712.3|0|2353	5	69.6
ENSG00000264324.1|mRNA|AC006030.1|ENSG00000264324.1|ENSG00000264324.1|0|5059	5	69
ENSG00000180817.11|mRNA|PPA1|ENSG00000180817.11|ENSG00000180817.11|0|5171	5	63.8
ENSG00000081721.11|mRNA|DUSP12|ENSG00000081721.11|ENSG00000081721.11|0|1762	5	72
ENSG00000165140.9|mRNA|FBP1|ENSG00000165140.9|ENSG00000165140.9|0|1668	5	62
ENSG00000151491.12|mRNA|EPS8|ENSG00000151491.12|ENSG00000151491.12|0|6200	5	36
ENSG00000065978.18|mRNA|YBX1|ENSG00000065978.18|ENSG00000065978.18|0|1930	5	50.6
ENSG00000145723.16|mRNA|GIN1|ENSG00000145723.16|ENSG00000145723.16|0|4182	5	43.2
ENSG00000166086.12|mRNA|JAM3|ENSG00000166086.12|ENSG00000166086.12|0|5451	5	65.2
ENSG00000138413.13|mRNA|IDH1|ENSG00000138413.13|ENSG00000138413.13|0|4721	5	67.6
ENSG00000259316.10|mRNA|AC087632.1|ENSG00000259316.10|ENSG00000259316.10|0|3357	5	46.8
hsa_circ_0070808|circRNA|hsa_circ_0070808|hsa_circ_0070808|hsa_circ_0070808|0|504	5	55.2
ENSG00000273149.1|lncRNA|AL138963.3|ENSG00000273149.1|ENSG00000273149.1|0|588	5	72
ENSG00000173418.11|mRNA|NAA20|ENSG00000173418.11|ENSG00000173418.11|0|2376	5	51.6
ENSG00000059573.8|mRNA|ALDH18A1|ENSG00000059573.8|ENSG00000059573.8|0|3766	5	62.2
ENSG00000136573.12|mRNA|BLK|ENSG00000136573.12|ENSG00000136573.12|0|4803	5	49
ENSG00000167414.4|mRNA|GNG8|ENSG00000167414.4|ENSG00000167414.4|0|216	5	48.6
ENSG00000165476.13|mRNA|REEP3|ENSG00000165476.13|ENSG00000165476.13|0|5248	5	23.6
ENSG00000076984.17|mRNA|MAP2K7|ENSG00000076984.17|ENSG00000076984.17|0|5145	5	47.8
ENSG00000066117.14|mRNA|SMARCD1|ENSG00000066117.14|ENSG00000066117.14|0|5136	5	59.4
ENSG00000257411.1|mRNA|AC034102.2|ENSG00000257411.1|ENSG00000257411.1|0|489	5	43.8
ENSG00000257341.5|mRNA|AL928654.4|ENSG00000257341.5|ENSG00000257341.5|0|1408	5	51.8
hsa_circ_0070802|circRNA|hsa_circ_0070802|hsa_circ_0070802|hsa_circ_0070802|0|472	5	72.2
ENSG00000149600.11|mRNA|COMMD7|ENSG00000149600.11|ENSG00000149600.11|0|2584	5	37.8
ENSG00000265257.5|lncRNA|AP005263.1|ENSG00000265257.5|ENSG00000265257.5|0|1050	5	60.2
ENSG00000135315.11|mRNA|CEP162|ENSG00000135315.11|ENSG00000135315.11|0|5474	5	46.4
ENSG00000167986.13|mRNA|DDB1|ENSG00000167986.13|ENSG00000167986.13|0|13950	5	59.6
ENSG00000163382.11|mRNA|NAXE|ENSG00000163382.11|ENSG00000163382.11|0|1933	5	69
ENSG00000135297.15|mRNA|MTO1|ENSG00000135297.15|ENSG00000135297.15|0|12071	5	75.8
ENSG00000172175.12|mRNA|MALT1|ENSG00000172175.12|ENSG00000172175.12|0|10850	5	83.2
ENSG00000259330.2|mRNA|INAFM2|ENSG00000259330.2|ENSG00000259330.2|0|3052	5	48.8
ENSG00000138411.10|mRNA|HECW2|ENSG00000138411.10|ENSG00000138411.10|0|12692	5	55.8
hsa_circ_0034480|circRNA|hsa_circ_0034480|hsa_circ_0034480|hsa_circ_0034480|0|600	5	35.6
ENSG00000113552.15|mRNA|GNPDA1|ENSG00000113552.15|ENSG00000113552.15|0|3961	5	58.6
ENSG00000114999.7|mRNA|TTL|ENSG00000114999.7|ENSG00000114999.7|0|15732	5	52.2
hsa_circ_0015068|circRNA|hsa_circ_0015068|hsa_circ_0015068|hsa_circ_0015068|0|600	5	57.4
ENSG00000105808.17|mRNA|RASA4|ENSG00000105808.17|ENSG00000105808.17|0|8077	5	61.4
ENSG00000188725.7|mRNA|SMIM15|ENSG00000188725.7|ENSG00000188725.7|0|2889	5	39.6
ENSG00000204160.11|mRNA|ZDHHC18|ENSG00000204160.11|ENSG00000204160.11|0|5436	5	60.4
ENSG00000111679.16|mRNA|PTPN6|ENSG00000111679.16|ENSG00000111679.16|0|5009	5	65
ENSG00000111639.7|mRNA|MRPL51|ENSG00000111639.7|ENSG00000111639.7|0|1551	5	75.2
ENSG00000105516.10|mRNA|DBP|ENSG00000105516.10|ENSG00000105516.10|0|6544	5	52.8
ENSG00000113558.18|mRNA|SKP1|ENSG00000113558.18|ENSG00000113558.18|0|12771	5	52
ENSG00000196511.14|mRNA|TPK1|ENSG00000196511.14|ENSG00000196511.14|0|8442	5	46.6
ENSG00000108106.13|mRNA|UBE2S|ENSG00000108106.13|ENSG00000108106.13|0|2788	5	83.4
ENSG00000113048.16|mRNA|MRPS27|ENSG00000113048.16|ENSG00000113048.16|0|6511	5	33.6
ENSG00000125482.12|mRNA|TTF1|ENSG00000125482.12|ENSG00000125482.12|0|3215	5	49.2
ENSG00000105383.14|mRNA|CD33|ENSG00000105383.14|ENSG00000105383.14|0|5975	5	63.4
ENSG00000121022.13|mRNA|COPS5|ENSG00000121022.13|ENSG00000121022.13|0|7779	5	54.8
hsa_circ_0013731|circRNA|hsa_circ_0013731|hsa_circ_0013731|hsa_circ_0013731|0|512	5	54.2
ENSG00000110711.9|mRNA|AIP|ENSG00000110711.9|ENSG00000110711.9|0|1640	5	62.6
ENSG00000110446.10|mRNA|SLC15A3|ENSG00000110446.10|ENSG00000110446.10|0|6118	5	57.4
ENSG00000122223.12|mRNA|CD244|ENSG00000122223.12|ENSG00000122223.12|0|2857	5	67.6
ENSG00000112561.17|mRNA|TFEB|ENSG00000112561.17|ENSG00000112561.17|0|5648	4	66
ENSG00000182903.15|mRNA|ZNF721|ENSG00000182903.15|ENSG00000182903.15|0|6390	4	41.25
ENSG00000137133.10|mRNA|HINT2|ENSG00000137133.10|ENSG00000137133.10|0|2395	4	43.5
ENSG00000112977.15|mRNA|DAP|ENSG00000112977.15|ENSG00000112977.15|0|3361	4	43.25
hsa_circ_0085426|circRNA|hsa_circ_0085426|hsa_circ_0085426|hsa_circ_0085426|0|600	4	35
ENSG00000251595.7|pseudogene|ABCA11P|ENSG00000251595.7|ENSG00000251595.7|0|2790	4	17
ENSG00000102879.15|mRNA|CORO1A|ENSG00000102879.15|ENSG00000102879.15|0|4871	4	72
ENSG00000137154.12|mRNA|RPS6|ENSG00000137154.12|ENSG00000137154.12|0|2714	4	83.25
ENSG00000044459.14|mRNA|CNTLN|ENSG00000044459.14|ENSG00000044459.14|0|11064	4	41.75
hsa_circ_0072593|circRNA|hsa_circ_0072593|hsa_circ_0072593|hsa_circ_0072593|0|540	4	35.25
ENSG00000136826.14|mRNA|KLF4|ENSG00000136826.14|ENSG00000136826.14|0|3659	4	65
ENSG00000089220.4|mRNA|PEBP1|ENSG00000089220.4|ENSG00000089220.4|0|1780	4	72
ENSG00000111737.11|mRNA|RAB35|ENSG00000111737.11|ENSG00000111737.11|0|4022	4	64.75
ENSG00000160679.12|mRNA|CHTOP|ENSG00000160679.12|ENSG00000160679.12|0|5625	4	75.25
ENSG00000276409.4|mRNA|CCL14|ENSG00000276409.4|ENSG00000276409.4|0|3269	4	49.75
ENSG00000278828.1|mRNA|HIST1H3H|ENSG00000278828.1|ENSG00000278828.1|0|1237	4	50.25
ENSG00000100599.15|mRNA|RIN3|ENSG00000100599.15|ENSG00000100599.15|0|8683	4	73.5
ENSG00000136040.8|mRNA|PLXNC1|ENSG00000136040.8|ENSG00000136040.8|0|9887	4	32.5
ENSG00000135999.11|mRNA|EPC2|ENSG00000135999.11|ENSG00000135999.11|0|5582	4	38.75
ENSG00000162972.10|mRNA|MAIP1|ENSG00000162972.10|ENSG00000162972.10|0|1624	4	51.5
ENSG00000163220.10|mRNA|S100A9|ENSG00000163220.10|ENSG00000163220.10|0|577	4	73.25
ENSG00000121274.12|mRNA|PAPD5|ENSG00000121274.12|ENSG00000121274.12|0|8144	4	55.25
ENSG00000282804.1|mRNA|AL512428.1|ENSG00000282804.1|ENSG00000282804.1|0|654	4	49.75
ENSG00000173905.8|mRNA|GOLIM4|ENSG00000173905.8|ENSG00000173905.8|0|4647	4	58.75
ENSG00000136718.9|mRNA|IMP4|ENSG00000136718.9|ENSG00000136718.9|0|3861	4	45
ENSG00000073417.14|mRNA|PDE8A|ENSG00000073417.14|ENSG00000073417.14|0|7886	4	84.75
ENSG00000119285.10|mRNA|HEATR1|ENSG00000119285.10|ENSG00000119285.10|0|9049	4	47.5
ENSG00000117281.15|mRNA|CD160|ENSG00000117281.15|ENSG00000117281.15|0|3971	4	53.5
ENSG00000087266.15|mRNA|SH3BP2|ENSG00000087266.15|ENSG00000087266.15|0|13968	4	64.5
ENSG00000141510.16|mRNA|TP53|ENSG00000141510.16|ENSG00000141510.16|0|4576	4	77.75
ENSG00000177954.11|mRNA|RPS27|ENSG00000177954.11|ENSG00000177954.11|0|946	4	59.5
ENSG00000147408.14|mRNA|CSGALNACT1|ENSG00000147408.14|ENSG00000147408.14|0|6580	4	45.25
ENSG00000141574.7|mRNA|SECTM1|ENSG00000141574.7|ENSG00000141574.7|0|2961	4	55.5
ENSG00000079462.7|mRNA|PAFAH1B3|ENSG00000079462.7|ENSG00000079462.7|0|1419	4	59.75
ENSG00000115556.13|mRNA|PLCD4|ENSG00000115556.13|ENSG00000115556.13|0|5867	4	58.75
ENSG00000117519.15|mRNA|CNN3|ENSG00000117519.15|ENSG00000117519.15|0|2838	4	46.25
ENSG00000145819.15|mRNA|ARHGAP26|ENSG00000145819.15|ENSG00000145819.15|0|13347	4	35.75
ENSG00000115652.14|mRNA|UXS1|ENSG00000115652.14|ENSG00000115652.14|0|7023	4	57
hsa_circ_0070794|circRNA|hsa_circ_0070794|hsa_circ_0070794|hsa_circ_0070794|0|600	4	67
ENSG00000143862.7|mRNA|ARL8A|ENSG00000143862.7|ENSG00000143862.7|0|1975	4	51.5
ENSG00000083290.19|mRNA|ULK2|ENSG00000083290.19|ENSG00000083290.19|0|9843	4	42
ENSG00000117118.9|mRNA|SDHB|ENSG00000117118.9|ENSG00000117118.9|0|2462	4	79.25
ENSG00000213995.11|mRNA|NAXD|ENSG00000213995.11|ENSG00000213995.11|0|2847	4	55
ENSG00000076248.10|mRNA|UNG|ENSG00000076248.10|ENSG00000076248.10|0|2567	4	48.75
hsa_circ_0072579|circRNA|hsa_circ_0072579|hsa_circ_0072579|hsa_circ_0072579|0|600	4	57.5
ENSG00000139193.3|mRNA|CD27|ENSG00000139193.3|ENSG00000139193.3|0|1410	4	54
ENSG00000030419.16|mRNA|IKZF2|ENSG00000030419.16|ENSG00000030419.16|0|12240	4	37.75
ENSG00000138363.14|mRNA|ATIC|ENSG00000138363.14|ENSG00000138363.14|0|3928	4	80.5
ENSG00000155966.13|mRNA|AFF2|ENSG00000155966.13|ENSG00000155966.13|0|14006	4	57.5
ENSG00000075340.22|mRNA|ADD2|ENSG00000075340.22|ENSG00000075340.22|0|12673	4	85.5
ENSG00000153107.11|mRNA|ANAPC1|ENSG00000153107.11|ENSG00000153107.11|0|13327	4	18
ENSG00000114209.14|mRNA|PDCD10|ENSG00000114209.14|ENSG00000114209.14|0|3275	4	59.5
ENSG00000151838.11|mRNA|CCDC175|ENSG00000151838.11|ENSG00000151838.11|0|3245	4	54.25
ENSG00000117640.17|mRNA|MTFR1L|ENSG00000117640.17|ENSG00000117640.17|0|5817	4	91.5
ENSG00000102401.19|mRNA|ARMCX3|ENSG00000102401.19|ENSG00000102401.19|0|4239	4	63
ENSG00000139343.10|mRNA|SNRPF|ENSG00000139343.10|ENSG00000139343.10|0|3043	4	47.75
ENSG00000151327.12|mRNA|FAM177A1|ENSG00000151327.12|ENSG00000151327.12|0|8385	4	43.25
ENSG00000118246.13|mRNA|FASTKD2|ENSG00000118246.13|ENSG00000118246.13|0|6079	4	17
ENSG00000256269.7|mRNA|HMBS|ENSG00000256269.7|ENSG00000256269.7|0|4247	4	51.75
ENSG00000115073.7|mRNA|ACTR1B|ENSG00000115073.7|ENSG00000115073.7|0|2892	4	54.25
ENSG00000134987.11|mRNA|WDR36|ENSG00000134987.11|ENSG00000134987.11|0|7656	4	49.25
hsa_circ_0073592|circRNA|hsa_circ_0073592|hsa_circ_0073592|hsa_circ_0073592|0|600	4	37.25
ENSG00000197353.3|mRNA|LYPD2|ENSG00000197353.3|ENSG00000197353.3|0|594	4	37.75
hsa_circ_0000994|circRNA|hsa_circ_0000994|hsa_circ_0000994|hsa_circ_0000994|0|600	4	76.5
ENSG00000165689.16|mRNA|SDCCAG3|ENSG00000165689.16|ENSG00000165689.16|0|3133	4	69
ENSG00000165782.10|mRNA|TMEM55B|ENSG00000165782.10|ENSG00000165782.10|0|3803	4	62
ENSG00000239998.5|mRNA|LILRA2|ENSG00000239998.5|ENSG00000239998.5|0|5349	4	61.75
ENSG00000004142.11|mRNA|POLDIP2|ENSG00000004142.11|ENSG00000004142.11|0|2121	4	72.75
ENSG00000133112.16|mRNA|TPT1|ENSG00000133112.16|ENSG00000133112.16|0|7269	4	74.5
ENSG00000130159.13|mRNA|ECSIT|ENSG00000130159.13|ENSG00000130159.13|0|2370	4	38.25
ENSG00000169251.12|mRNA|NMD3|ENSG00000169251.12|ENSG00000169251.12|0|4869	4	62.5
ENSG00000061273.17|mRNA|HDAC7|ENSG00000061273.17|ENSG00000061273.17|0|9928	4	36.5
ENSG00000169180.11|mRNA|XPO6|ENSG00000169180.11|ENSG00000169180.11|0|7065	4	54.75
ENSG00000172673.10|mRNA|THEMIS|ENSG00000172673.10|ENSG00000172673.10|0|4309	4	71
ENSG00000128050.8|mRNA|PAICS|ENSG00000128050.8|ENSG00000128050.8|0|7517	4	58.5
ENSG00000168961.16|mRNA|LGALS9|ENSG00000168961.16|ENSG00000168961.16|0|5714	4	70.25
ENSG00000130775.15|mRNA|THEMIS2|ENSG00000130775.15|ENSG00000130775.15|0|4621	4	62.5
ENSG00000214447.4|mRNA|FAM187A|ENSG00000214447.4|ENSG00000214447.4|0|3459	4	56.25
ENSG00000167522.14|mRNA|ANKRD11|ENSG00000167522.14|ENSG00000167522.14|0|16949	4	64
ENSG00000235288.3|lncRNA|AC099329.1|ENSG00000235288.3|ENSG00000235288.3|0|1956	4	66
ENSG00000185697.16|mRNA|MYBL1|ENSG00000185697.16|ENSG00000185697.16|0|7239	4	75.75
hsa_circ_0002474|circRNA|hsa_circ_0002474|hsa_circ_0002474|hsa_circ_0002474|0|600	4	71.75
ENSG00000234961.1|lncRNA|AL133415.1|ENSG00000234961.1|ENSG00000234961.1|0|706	4	54.25
ENSG00000186298.11|mRNA|PPP1CC|ENSG00000186298.11|ENSG00000186298.11|0|6906	4	58.75
ENSG00000104312.7|mRNA|RIPK2|ENSG00000104312.7|ENSG00000104312.7|0|3117	4	35.5
ENSG00000125538.11|mRNA|IL1B|ENSG00000125538.11|ENSG00000125538.11|0|3096	4	64.25
ENSG00000131042.14|mRNA|LILRB2|ENSG00000131042.14|ENSG00000131042.14|0|3810	4	73.25
ENSG00000064703.11|mRNA|DDX20|ENSG00000064703.11|ENSG00000064703.11|0|6019	4	87.5
ENSG00000173726.10|mRNA|TOMM20|ENSG00000173726.10|ENSG00000173726.10|0|3542	4	46.25
ENSG00000126581.12|mRNA|BECN1|ENSG00000126581.12|ENSG00000126581.12|0|6414	4	53
ENSG00000170296.9|mRNA|GABARAP|ENSG00000170296.9|ENSG00000170296.9|0|2266	4	72.25
ENSG00000126756.11|mRNA|UXT|ENSG00000126756.11|ENSG00000126756.11|0|1243	4	56.25
ENSG00000105058.11|mRNA|FAM32A|ENSG00000105058.11|ENSG00000105058.11|0|1921	4	31.75
hsa_circ_0079660|circRNA|hsa_circ_0079660|hsa_circ_0079660|hsa_circ_0079660|0|324	4	37.25
hsa_circ_0000051|circRNA|hsa_circ_0000051|hsa_circ_0000051|hsa_circ_0000051|0|600	4	41.75
ENSG00000154518.9|mRNA|ATP5G3|ENSG00000154518.9|ENSG00000154518.9|0|6780	3	70.6667
ENSG00000152291.13|mRNA|TGOLN2|ENSG00000152291.13|ENSG00000152291.13|0|7081	3	50.3333
ENSG00000168785.7|mRNA|TSPAN5|ENSG00000168785.7|ENSG00000168785.7|0|7430	3	74.6667
ENSG00000170836.11|mRNA|PPM1D|ENSG00000170836.11|ENSG00000170836.11|0|5044	3	91.3333
ENSG00000261864.1|lncRNA|AC130462.1|ENSG00000261864.1|ENSG00000261864.1|0|549	3	20.6667
hsa_circ_0010463|circRNA|hsa_circ_0010463|hsa_circ_0010463|hsa_circ_0010463|0|600	3	24
ENSG00000154620.5|mRNA|TMSB4Y|ENSG00000154620.5|ENSG00000154620.5|0|1669	3	79
ENSG00000175792.11|mRNA|RUVBL1|ENSG00000175792.11|ENSG00000175792.11|0|6860	3	63.6667
ENSG00000205220.11|mRNA|PSMB10|ENSG00000205220.11|ENSG00000205220.11|0|1853	3	73.3333
ENSG00000143622.10|mRNA|RIT1|ENSG00000143622.10|ENSG00000143622.10|0|3919	3	52.3333
ENSG00000229308.1|lncRNA|AC010737.1|ENSG00000229308.1|ENSG00000229308.1|0|559	3	34.6667
hsa_circ_0080851|circRNA|hsa_circ_0080851|hsa_circ_0080851|hsa_circ_0080851|0|600	3	50.6667
ENSG00000054965.10|mRNA|FAM168A|ENSG00000054965.10|ENSG00000054965.10|0|7887	3	63
ENSG00000153707.16|mRNA|PTPRD|ENSG00000153707.16|ENSG00000153707.16|0|11165	3	59
ENSG00000116701.14|mRNA|NCF2|ENSG00000116701.14|ENSG00000116701.14|0|2928	3	59.3333
ENSG00000113851.14|mRNA|CRBN|ENSG00000113851.14|ENSG00000113851.14|0|8068	3	49.6667
ENSG00000168807.16|mRNA|SNTB2|ENSG00000168807.16|ENSG00000168807.16|0|9875	3	86.3333
ENSG00000205236.6|mRNA|AC105052.1|ENSG00000205236.6|ENSG00000205236.6|0|3569	3	61
hsa_circ_0039251|circRNA|hsa_circ_0039251|hsa_circ_0039251|hsa_circ_0039251|0|600	3	22.6667
ENSG00000180284.5|pseudogene|AL049610.1|ENSG00000180284.5|ENSG00000180284.5|0|372	3	81.3333
ENSG00000169925.16|mRNA|BRD3|ENSG00000169925.16|ENSG00000169925.16|0|6876	3	66.3333
ENSG00000224959.1|lncRNA|AC017002.1|ENSG00000224959.1|ENSG00000224959.1|0|881	3	49
ENSG00000169718.17|mRNA|DUS1L|ENSG00000169718.17|ENSG00000169718.17|0|5999	3	33.6667
ENSG00000105559.11|mRNA|PLEKHA4|ENSG00000105559.11|ENSG00000105559.11|0|3851	3	37.6667
hsa_circ_0081607|circRNA|hsa_circ_0081607|hsa_circ_0081607|hsa_circ_0081607|0|600	3	43
ENSG00000169967.16|mRNA|MAP3K2|ENSG00000169967.16|ENSG00000169967.16|0|11508	3	52.3333
ENSG00000101856.9|mRNA|PGRMC1|ENSG00000101856.9|ENSG00000101856.9|0|1919	3	56
ENSG00000234545.7|mRNA|FAM133B|ENSG00000234545.7|ENSG00000234545.7|0|4462	3	51
ENSG00000079313.13|mRNA|REXO1|ENSG00000079313.13|ENSG00000079313.13|0|5199	3	59.3333
ENSG00000048028.11|mRNA|USP28|ENSG00000048028.11|ENSG00000048028.11|0|5719	3	49
ENSG00000170043.11|mRNA|TRAPPC1|ENSG00000170043.11|ENSG00000170043.11|0|1171	3	38.3333
ENSG00000149516.13|mRNA|MS4A3|ENSG00000149516.13|ENSG00000149516.13|0|2095	3	44.3333
ENSG00000232112.3|mRNA|TMA7|ENSG00000232112.3|ENSG00000232112.3|0|1139	3	51.6667
ENSG00000049860.13|mRNA|HEXB|ENSG00000049860.13|ENSG00000049860.13|0|5067	3	29.6667
ENSG00000051108.14|mRNA|HERPUD1|ENSG00000051108.14|ENSG00000051108.14|0|5155	3	55.6667
ENSG00000172086.7|mRNA|KRCC1|ENSG00000172086.7|ENSG00000172086.7|0|1753	3	79.6667
ENSG00000115295.19|mRNA|CLIP4|ENSG00000115295.19|ENSG00000115295.19|0|7775	3	44.3333
ENSG00000114503.10|mRNA|NCBP2|ENSG00000114503.10|ENSG00000114503.10|0|5114	3	59.6667
hsa_circ_0024085|circRNA|hsa_circ_0024085|hsa_circ_0024085|hsa_circ_0024085|0|600	3	80
ENSG00000155545.19|mRNA|MIER3|ENSG00000155545.19|ENSG00000155545.19|0|5763	3	31.6667
ENSG00000198837.9|mRNA|DENND4B|ENSG00000198837.9|ENSG00000198837.9|0|7584	3	35
ENSG00000070501.11|mRNA|POLB|ENSG00000070501.11|ENSG00000070501.11|0|4106	3	52.3333
ENSG00000204822.6|mRNA|MRPL53|ENSG00000204822.6|ENSG00000204822.6|0|1344	3	78
hsa_circ_0018184|circRNA|hsa_circ_0018184|hsa_circ_0018184|hsa_circ_0018184|0|600	3	50.3333
ENSG00000249884.8|mRNA|RNF103-CHMP3|ENSG00000249884.8|ENSG00000249884.8|0|1503	3	78
ENSG00000068438.14|mRNA|FTSJ1|ENSG00000068438.14|ENSG00000068438.14|0|2872	3	62.6667
ENSG00000103811.15|mRNA|CTSH|ENSG00000103811.15|ENSG00000103811.15|0|5892	3	75
ENSG00000083896.12|mRNA|YTHDC1|ENSG00000083896.12|ENSG00000083896.12|0|7032	3	45
ENSG00000033050.7|mRNA|ABCF2|ENSG00000033050.7|ENSG00000033050.7|0|4448	3	60
ENSG00000066336.11|mRNA|SPI1|ENSG00000066336.11|ENSG00000066336.11|0|2069	3	45.6667
ENSG00000162910.18|mRNA|MRPL55|ENSG00000162910.18|ENSG00000162910.18|0|1886	3	39
hsa_circ_0079324|circRNA|hsa_circ_0079324|hsa_circ_0079324|hsa_circ_0079324|0|600	3	74.3333
ENSG00000168118.11|mRNA|RAB4A|ENSG00000168118.11|ENSG00000168118.11|0|3310	3	75.6667
hsa_circ_0091888|circRNA|hsa_circ_0091888|hsa_circ_0091888|hsa_circ_0091888|0|552	3	33.3333
ENSG00000164691.16|mRNA|TAGAP|ENSG00000164691.16|ENSG00000164691.16|0|4089	3	35
ENSG00000108528.13|mRNA|SLC25A11|ENSG00000108528.13|ENSG00000108528.13|0|2669	3	64
ENSG00000108561.8|mRNA|C1QBP|ENSG00000108561.8|ENSG00000108561.8|0|2335	3	65.3333
ENSG00000109971.13|mRNA|HSPA8|ENSG00000109971.13|ENSG00000109971.13|0|4849	3	54.6667
ENSG00000248516.1|lncRNA|AC105415.1|ENSG00000248516.1|ENSG00000248516.1|0|1416	3	58.6667
ENSG00000198771.10|mRNA|RCSD1|ENSG00000198771.10|ENSG00000198771.10|0|5718	3	67.3333
ENSG00000173890.16|mRNA|GPR160|ENSG00000173890.16|ENSG00000173890.16|0|4458	3	63.6667
ENSG00000173744.17|mRNA|AGFG1|ENSG00000173744.17|ENSG00000173744.17|0|9321	3	58
ENSG00000163788.13|mRNA|SNRK|ENSG00000163788.13|ENSG00000163788.13|0|6981	3	58
hsa_circ_0084119|circRNA|hsa_circ_0084119|hsa_circ_0084119|hsa_circ_0084119|0|600	3	81.6667
ENSG00000198189.10|mRNA|HSD17B11|ENSG00000198189.10|ENSG00000198189.10|0|2435	3	57.6667
ENSG00000070882.12|mRNA|OSBPL3|ENSG00000070882.12|ENSG00000070882.12|0|8100	3	50.6667
ENSG00000172932.14|mRNA|ANKRD13D|ENSG00000172932.14|ENSG00000172932.14|0|6643	3	68.6667
ENSG00000055163.19|mRNA|CYFIP2|ENSG00000055163.19|ENSG00000055163.19|0|10498	3	63.3333
ENSG00000167977.8|mRNA|KCTD5|ENSG00000167977.8|ENSG00000167977.8|0|3420	3	70
ENSG00000156171.14|mRNA|DRAM2|ENSG00000156171.14|ENSG00000156171.14|0|3138	3	27.6667
ENSG00000156482.10|mRNA|RPL30|ENSG00000156482.10|ENSG00000156482.10|0|4027	3	79
ENSG00000105963.13|mRNA|ADAP1|ENSG00000105963.13|ENSG00000105963.13|0|5062	3	67.3333
ENSG00000248235.6|mRNA|AC037459.1|ENSG00000248235.6|ENSG00000248235.6|0|1198	3	63.3333
ENSG00000175376.8|mRNA|EIF1AD|ENSG00000175376.8|ENSG00000175376.8|0|3327	3	56.6667
ENSG00000058729.10|mRNA|RIOK2|ENSG00000058729.10|ENSG00000058729.10|0|5502	3	64.3333
ENSG00000156873.15|mRNA|PHKG2|ENSG00000156873.15|ENSG00000156873.15|0|7509	3	44
ENSG00000157869.14|mRNA|RAB28|ENSG00000157869.14|ENSG00000157869.14|0|2221	3	47
ENSG00000106105.13|mRNA|GARS|ENSG00000106105.13|ENSG00000106105.13|0|4152	3	75.3333
ENSG00000158470.5|mRNA|B4GALT5|ENSG00000158470.5|ENSG00000158470.5|0|4722	3	22.3333
ENSG00000175224.16|mRNA|ATG13|ENSG00000175224.16|ENSG00000175224.16|0|7001	3	67
ENSG00000158850.14|mRNA|B4GALT3|ENSG00000158850.14|ENSG00000158850.14|0|3890	3	78.3333
ENSG00000112584.13|mRNA|FAM120B|ENSG00000112584.13|ENSG00000112584.13|0|6029	3	42.6667
ENSG00000039987.6|mRNA|BEST2|ENSG00000039987.6|ENSG00000039987.6|0|2646	3	40.3333
ENSG00000159079.18|mRNA|C21orf59|ENSG00000159079.18|ENSG00000159079.18|0|3353	3	40.6667
ENSG00000172890.11|mRNA|NADSYN1|ENSG00000172890.11|ENSG00000172890.11|0|16263	3	50
ENSG00000227550.2|pseudogene|TRBV7-5|ENSG00000227550.2|ENSG00000227550.2|0|345	3	49
ENSG00000062485.18|mRNA|CS|ENSG00000062485.18|ENSG00000062485.18|0|6402	3	56
ENSG00000166401.14|mRNA|SERPINB8|ENSG00000166401.14|ENSG00000166401.14|0|5868	3	62.6667
ENSG00000156642.16|mRNA|NPTN|ENSG00000156642.16|ENSG00000156642.16|0|4032	3	72.6667
ENSG00000149262.16|mRNA|INTS4|ENSG00000149262.16|ENSG00000149262.16|0|6074	3	47.3333
ENSG00000196510.12|mRNA|ANAPC7|ENSG00000196510.12|ENSG00000196510.12|0|6009	3	39.3333
hsa_circ_0057338|circRNA|hsa_circ_0057338|hsa_circ_0057338|hsa_circ_0057338|0|600	3	42.6667
hsa_circ_0007694|circRNA|hsa_circ_0007694|hsa_circ_0007694|hsa_circ_0007694|0|344	3	80.6667
ENSG00000100092.20|mRNA|SH3BP1|ENSG00000100092.20|ENSG00000100092.20|0|6170	3	66.6667
ENSG00000087302.8|mRNA|C14orf166|ENSG00000087302.8|ENSG00000087302.8|0|8323	3	95
ENSG00000139620.12|mRNA|KANSL2|ENSG00000139620.12|ENSG00000139620.12|0|3386	3	59
ENSG00000130255.12|mRNA|RPL36|ENSG00000130255.12|ENSG00000130255.12|0|2272	3	85.3333
ENSG00000130363.11|mRNA|RSPH3|ENSG00000130363.11|ENSG00000130363.11|0|6561	3	35.6667
ENSG00000185236.11|mRNA|RAB11B|ENSG00000185236.11|ENSG00000185236.11|0|2470	3	69.6667
ENSG00000186918.13|mRNA|ZNF395|ENSG00000186918.13|ENSG00000186918.13|0|5819	3	41.6667
ENSG00000101138.11|mRNA|CSTF1|ENSG00000101138.11|ENSG00000101138.11|0|4800	3	29.3333
hsa_circ_0006659|circRNA|hsa_circ_0006659|hsa_circ_0006659|hsa_circ_0006659|0|600	3	29.3333
ENSG00000141854.9|mRNA|MISP3|ENSG00000141854.9|ENSG00000141854.9|0|2354	3	47
ENSG00000010165.19|mRNA|METTL13|ENSG00000010165.19|ENSG00000010165.19|0|3827	3	53
ENSG00000215845.10|mRNA|TSTD1|ENSG00000215845.10|ENSG00000215845.10|0|1210	3	63.6667
ENSG00000223865.10|mRNA|HLA-DPB1|ENSG00000223865.10|ENSG00000223865.10|0|2791	3	50.6667
ENSG00000284341.1|mRNA|AL807752.7|ENSG00000284341.1|ENSG00000284341.1|0|989	3	69
ENSG00000131043.11|mRNA|AAR2|ENSG00000131043.11|ENSG00000131043.11|0|3101	3	57.3333
ENSG00000018610.13|mRNA|CXorf56|ENSG00000018610.13|ENSG00000018610.13|0|2580	3	46.6667
ENSG00000213145.9|mRNA|CRIP1|ENSG00000213145.9|ENSG00000213145.9|0|2485	3	79
ENSG00000131100.12|mRNA|ATP6V1E1|ENSG00000131100.12|ENSG00000131100.12|0|3212	3	56.6667
ENSG00000137760.14|mRNA|ALKBH8|ENSG00000137760.14|ENSG00000137760.14|0|4506	3	24.3333
ENSG00000181481.13|mRNA|RNF135|ENSG00000181481.13|ENSG00000181481.13|0|3580	3	35.3333
ENSG00000134330.18|mRNA|IAH1|ENSG00000134330.18|ENSG00000134330.18|0|5908	3	45.3333
ENSG00000101084.17|mRNA|C20orf24|ENSG00000101084.17|ENSG00000101084.17|0|1549	3	76.3333
ENSG00000119403.13|mRNA|PHF19|ENSG00000119403.13|ENSG00000119403.13|0|6733	3	60.3333
hsa_circ_0056198|circRNA|hsa_circ_0056198|hsa_circ_0056198|hsa_circ_0056198|0|600	3	48
ENSG00000142453.11|mRNA|CARM1|ENSG00000142453.11|ENSG00000142453.11|0|4455	3	71.3333
ENSG00000013275.7|mRNA|PSMC4|ENSG00000013275.7|ENSG00000013275.7|0|2387	3	68.3333
ENSG00000100296.13|mRNA|THOC5|ENSG00000100296.13|ENSG00000100296.13|0|7878	3	61
ENSG00000187531.13|mRNA|SIRT7|ENSG00000187531.13|ENSG00000187531.13|0|6152	3	48
hsa_circ_0007017|circRNA|hsa_circ_0007017|hsa_circ_0007017|hsa_circ_0007017|0|600	3	76.6667
ENSG00000100890.15|mRNA|KIAA0391|ENSG00000100890.15|ENSG00000100890.15|0|6982	3	83
ENSG00000267787.5|lncRNA|AC027097.2|ENSG00000267787.5|ENSG00000267787.5|0|2032	3	33.6667
ENSG00000184838.14|mRNA|PRR16|ENSG00000184838.14|ENSG00000184838.14|0|2274	3	56.6667
ENSG00000018280.16|mRNA|SLC11A1|ENSG00000018280.16|ENSG00000018280.16|0|8676	3	41.3333
ENSG00000228651.1|lncRNA|AC074327.1|ENSG00000228651.1|ENSG00000228651.1|0|650	3	71.6667
ENSG00000125971.16|mRNA|DYNLRB1|ENSG00000125971.16|ENSG00000125971.16|0|2460	3	38
ENSG00000135457.9|mRNA|TFCP2|ENSG00000135457.9|ENSG00000135457.9|0|3827	3	59
ENSG00000139318.7|mRNA|DUSP6|ENSG00000139318.7|ENSG00000139318.7|0|4632	3	55.6667
ENSG00000280571.1|mRNA|AC099329.3|ENSG00000280571.1|ENSG00000280571.1|0|602	3	62.3333
ENSG00000181061.13|mRNA|HIGD1A|ENSG00000181061.13|ENSG00000181061.13|0|1675	3	75.3333
ENSG00000121879.3|mRNA|PIK3CA|ENSG00000121879.3|ENSG00000121879.3|0|9411	3	71.3333
ENSG00000139180.10|mRNA|NDUFA9|ENSG00000139180.10|ENSG00000139180.10|0|10391	3	58
ENSG00000088247.17|mRNA|KHSRP|ENSG00000088247.17|ENSG00000088247.17|0|4563	3	75
ENSG00000121691.4|mRNA|CAT|ENSG00000121691.4|ENSG00000121691.4|0|3347	3	86
hsa_circ_0006186|circRNA|hsa_circ_0006186|hsa_circ_0006186|hsa_circ_0006186|0|600	3	25.3333
ENSG00000063241.7|mRNA|ISOC2|ENSG00000063241.7|ENSG00000063241.7|0|4408	2	86.5
hsa_circ_0000303|circRNA|hsa_circ_0000303|hsa_circ_0000303|hsa_circ_0000303|0|600	2	38
ENSG00000173113.6|mRNA|TRMT112|ENSG00000173113.6|ENSG00000173113.6|0|1625	2	80
ENSG00000107679.14|mRNA|PLEKHA1|ENSG00000107679.14|ENSG00000107679.14|0|23986	2	66
ENSG00000165802.22|mRNA|NSMF|ENSG00000165802.22|ENSG00000165802.22|0|4912	2	73.5
ENSG00000165525.17|mRNA|NEMF|ENSG00000165525.17|ENSG00000165525.17|0|9426	2	71.5
ENSG00000243207.6|mRNA|PPAN-P2RY11|ENSG00000243207.6|ENSG00000243207.6|0|2661	2	66
ENSG00000107651.12|mRNA|SEC23IP|ENSG00000107651.12|ENSG00000107651.12|0|7867	2	80.5
ENSG00000133985.2|mRNA|TTC9|ENSG00000133985.2|ENSG00000133985.2|0|5217	2	64.5
ENSG00000123992.18|mRNA|DNPEP|ENSG00000123992.18|ENSG00000123992.18|0|4734	2	57
ENSG00000064490.13|mRNA|RFXANK|ENSG00000064490.13|ENSG00000064490.13|0|2503	2	88
ENSG00000165092.12|mRNA|ALDH1A1|ENSG00000165092.12|ENSG00000165092.12|0|2849	2	77.5
ENSG00000013583.8|mRNA|HEBP1|ENSG00000013583.8|ENSG00000013583.8|0|3442	2	75.5
ENSG00000284633.1|lncRNA|AL031590.1|ENSG00000284633.1|ENSG00000284633.1|0|4521	2	76
ENSG00000035681.7|mRNA|NSMAF|ENSG00000035681.7|ENSG00000035681.7|0|6165	2	57
ENSG00000122224.17|mRNA|LY9|ENSG00000122224.17|ENSG00000122224.17|0|9118	2	73.5
ENSG00000196154.11|mRNA|S100A4|ENSG00000196154.11|ENSG00000196154.11|0|1025	2	74
hsa_circ_0042698|circRNA|hsa_circ_0042698|hsa_circ_0042698|hsa_circ_0042698|0|600	2	66.5
ENSG00000103707.9|mRNA|MTFMT|ENSG00000103707.9|ENSG00000103707.9|0|3432	2	37.5
ENSG00000065989.15|mRNA|PDE4A|ENSG00000065989.15|ENSG00000065989.15|0|6646	2	74.5
ENSG00000204634.12|mRNA|TBC1D8|ENSG00000204634.12|ENSG00000204634.12|0|6030	2	94
ENSG00000282218.1|mRNA|AL132671.2|ENSG00000282218.1|ENSG00000282218.1|0|930	2	63.5
ENSG00000163348.3|mRNA|PYGO2|ENSG00000163348.3|ENSG00000163348.3|0|3630	2	57
ENSG00000163131.10|mRNA|CTSS|ENSG00000163131.10|ENSG00000163131.10|0|4228	2	80
hsa_circ_0063707|circRNA|hsa_circ_0063707|hsa_circ_0063707|hsa_circ_0063707|0|528	2	65
ENSG00000248489.1|lncRNA|LINC02062|ENSG00000248489.1|ENSG00000248489.1|0|478	2	46
hsa_circ_0005806|circRNA|hsa_circ_0005806|hsa_circ_0005806|hsa_circ_0005806|0|600	2	53.5
ENSG00000120526.10|mRNA|NUDCD1|ENSG00000120526.10|ENSG00000120526.10|0|4439	2	81
ENSG00000135900.3|mRNA|MRPL44|ENSG00000135900.3|ENSG00000135900.3|0|1748	2	93.5
ENSG00000162614.18|mRNA|NEXN|ENSG00000162614.18|ENSG00000162614.18|0|4436	2	52.5
ENSG00000092094.10|mRNA|OSGEP|ENSG00000092094.10|ENSG00000092094.10|0|5037	2	70
hsa_circ_0073587|circRNA|hsa_circ_0073587|hsa_circ_0073587|hsa_circ_0073587|0|600	2	57
ENSG00000109103.11|mRNA|UNC119|ENSG00000109103.11|ENSG00000109103.11|0|5128	2	56
hsa_circ_0005145|circRNA|hsa_circ_0005145|hsa_circ_0005145|hsa_circ_0005145|0|600	2	29
ENSG00000184117.11|mRNA|NIPSNAP1|ENSG00000184117.11|ENSG00000184117.11|0|3067	2	71.5
ENSG00000164047.4|mRNA|CAMP|ENSG00000164047.4|ENSG00000164047.4|0|745	2	86.5
ENSG00000122783.16|mRNA|C7orf49|ENSG00000122783.16|ENSG00000122783.16|0|5321	2	41.5
ENSG00000243491.1|lncRNA|AC082651.3|ENSG00000243491.1|ENSG00000243491.1|0|1947	2	22
ENSG00000108679.12|mRNA|LGALS3BP|ENSG00000108679.12|ENSG00000108679.12|0|3584	2	76
hsa_circ_0052526|circRNA|hsa_circ_0052526|hsa_circ_0052526|hsa_circ_0052526|0|600	2	81.5
ENSG00000065135.10|mRNA|GNAI3|ENSG00000065135.10|ENSG00000065135.10|0|27174	2	94
ENSG00000239961.2|mRNA|LILRA4|ENSG00000239961.2|ENSG00000239961.2|0|2171	2	45.5
ENSG00000122122.9|mRNA|SASH3|ENSG00000122122.9|ENSG00000122122.9|0|2711	2	16
hsa_circ_0023426|circRNA|hsa_circ_0023426|hsa_circ_0023426|hsa_circ_0023426|0|600	2	36.5
ENSG00000248098.11|mRNA|BCKDHA|ENSG00000248098.11|ENSG00000248098.11|0|2602	2	80
ENSG00000100385.13|mRNA|IL2RB|ENSG00000100385.13|ENSG00000100385.13|0|4700	2	45
ENSG00000163798.13|mRNA|SLC4A1AP|ENSG00000163798.13|ENSG00000163798.13|0|5207	2	38
ENSG00000134986.13|mRNA|NREP|ENSG00000134986.13|ENSG00000134986.13|0|9337	2	64.5
ENSG00000108828.15|mRNA|VAT1|ENSG00000108828.15|ENSG00000108828.15|0|3501	2	61
ENSG00000108854.15|mRNA|SMURF2|ENSG00000108854.15|ENSG00000108854.15|0|6961	2	79.5
ENSG00000124126.13|mRNA|PREX1|ENSG00000124126.13|ENSG00000124126.13|0|7393	2	41.5
ENSG00000084070.11|mRNA|SMAP2|ENSG00000084070.11|ENSG00000084070.11|0|3631	2	59.5
ENSG00000011600.11|mRNA|TYROBP|ENSG00000011600.11|ENSG00000011600.11|0|907	2	71.5
ENSG00000169398.19|mRNA|PTK2|ENSG00000169398.19|ENSG00000169398.19|0|13742	2	77
ENSG00000169738.7|mRNA|DCXR|ENSG00000169738.7|ENSG00000169738.7|0|1902	2	72
ENSG00000128340.14|mRNA|RAC2|ENSG00000128340.14|ENSG00000128340.14|0|2532	2	51.5
ENSG00000233718.7|lncRNA|MYCNOS|ENSG00000233718.7|ENSG00000233718.7|0|2413	2	53.5
ENSG00000042088.13|mRNA|TDP1|ENSG00000042088.13|ENSG00000042088.13|0|6227	2	87
ENSG00000128463.12|mRNA|EMC4|ENSG00000128463.12|ENSG00000128463.12|0|4459	2	71
ENSG00000169567.11|mRNA|HINT1|ENSG00000169567.11|ENSG00000169567.11|0|1936	2	73.5
hsa_circ_0036250|circRNA|hsa_circ_0036250|hsa_circ_0036250|hsa_circ_0036250|0|600	2	22.5
hsa_circ_0002898|circRNA|hsa_circ_0002898|hsa_circ_0002898|hsa_circ_0002898|0|600	2	31.5
ENSG00000130305.16|mRNA|NSUN5|ENSG00000130305.16|ENSG00000130305.16|0|3414	2	45.5
ENSG00000169228.13|mRNA|RAB24|ENSG00000169228.13|ENSG00000169228.13|0|2065	2	43.5
ENSG00000172062.16|mRNA|SMN1|ENSG00000172062.16|ENSG00000172062.16|0|3097	2	35.5
ENSG00000130640.13|mRNA|TUBGCP2|ENSG00000130640.13|ENSG00000130640.13|0|7697	2	75.5
hsa_circ_0057029|circRNA|hsa_circ_0057029|hsa_circ_0057029|hsa_circ_0057029|0|600	2	39.5
ENSG00000130725.7|mRNA|UBE2M|ENSG00000130725.7|ENSG00000130725.7|0|1831	2	44
ENSG00000100220.11|mRNA|RTCB|ENSG00000100220.11|ENSG00000100220.11|0|2948	2	81
ENSG00000169877.9|mRNA|AHSP|ENSG00000169877.9|ENSG00000169877.9|0|562	2	54.5
ENSG00000128016.5|mRNA|ZFP36|ENSG00000128016.5|ENSG00000128016.5|0|2010	2	90
ENSG00000187475.5|mRNA|HIST1H1T|ENSG00000187475.5|ENSG00000187475.5|0|718	2	37
ENSG00000127920.5|mRNA|GNG11|ENSG00000127920.5|ENSG00000127920.5|0|3055	2	47.5
ENSG00000127054.20|mRNA|INTS11|ENSG00000127054.20|ENSG00000127054.20|0|8220	2	73
ENSG00000125835.18|mRNA|SNRPB|ENSG00000125835.18|ENSG00000125835.18|0|1278	2	86
ENSG00000105369.9|mRNA|CD79A|ENSG00000105369.9|ENSG00000105369.9|0|1503	2	93.5
ENSG00000231437.3|lncRNA|LINC01750|ENSG00000231437.3|ENSG00000231437.3|0|3590	2	80.5
ENSG00000170667.14|mRNA|RASA4B|ENSG00000170667.14|ENSG00000170667.14|0|4840	2	62.5
hsa_circ_0085307|circRNA|hsa_circ_0085307|hsa_circ_0085307|hsa_circ_0085307|0|600	2	79.5
ENSG00000170892.10|mRNA|TSEN34|ENSG00000170892.10|ENSG00000170892.10|0|3542	2	76
ENSG00000231389.7|mRNA|HLA-DPA1|ENSG00000231389.7|ENSG00000231389.7|0|5748	2	44.5
ENSG00000171132.13|mRNA|PRKCE|ENSG00000171132.13|ENSG00000171132.13|0|9908	2	36.5
ENSG00000230749.4|lncRNA|MEIS1-AS2|ENSG00000230749.4|ENSG00000230749.4|0|1029	2	71
ENSG00000105176.17|mRNA|URI1|ENSG00000105176.17|ENSG00000105176.17|0|5432	2	61
ENSG00000126246.9|mRNA|IGFLR1|ENSG00000126246.9|ENSG00000126246.9|0|2203	2	18
hsa_circ_0002943|circRNA|hsa_circ_0002943|hsa_circ_0002943|hsa_circ_0002943|0|600	2	69
ENSG00000234694.1|lncRNA|AL139289.2|ENSG00000234694.1|ENSG00000234694.1|0|661	2	43.5
ENSG00000173068.17|mRNA|BNC2|ENSG00000173068.17|ENSG00000173068.17|0|15323	2	48
ENSG00000124302.12|mRNA|CHST8|ENSG00000124302.12|ENSG00000124302.12|0|3052	2	65.5
ENSG00000167208.14|mRNA|SNX20|ENSG00000167208.14|ENSG00000167208.14|0|5754	2	41
ENSG00000167193.7|mRNA|CRK|ENSG00000167193.7|ENSG00000167193.7|0|4090	2	57
hsa_circ_0041193|circRNA|hsa_circ_0041193|hsa_circ_0041193|hsa_circ_0041193|0|600	2	64.5
ENSG00000166927.12|mRNA|MS4A7|ENSG00000166927.12|ENSG00000166927.12|0|4348	2	54.5
ENSG00000213782.7|mRNA|DDX47|ENSG00000213782.7|ENSG00000213782.7|0|5040	2	86
ENSG00000162378.12|mRNA|ZYG11B|ENSG00000162378.12|ENSG00000162378.12|0|8198	2	30.5
hsa_circ_0004317|circRNA|hsa_circ_0004317|hsa_circ_0004317|hsa_circ_0004317|0|600	2	69
ENSG00000105819.13|mRNA|PMPCB|ENSG00000105819.13|ENSG00000105819.13|0|4835	2	66
ENSG00000132773.11|mRNA|TOE1|ENSG00000132773.11|ENSG00000132773.11|0|2742	2	37
ENSG00000106829.18|mRNA|TLE4|ENSG00000106829.18|ENSG00000106829.18|0|8187	2	40.5
ENSG00000039319.16|mRNA|ZFYVE16|ENSG00000039319.16|ENSG00000039319.16|0|11461	2	38
ENSG00000107140.15|mRNA|TESK1|ENSG00000107140.15|ENSG00000107140.15|0|3298	2	39
ENSG00000166164.15|mRNA|BRD7|ENSG00000166164.15|ENSG00000166164.15|0|8492	2	83.5
ENSG00000166153.16|mRNA|DEPDC4|ENSG00000166153.16|ENSG00000166153.16|0|3118	2	78.5
ENSG00000106780.8|mRNA|MEGF9|ENSG00000106780.8|ENSG00000106780.8|0|6298	2	84.5
hsa_circ_0001187|circRNA|hsa_circ_0001187|hsa_circ_0001187|hsa_circ_0001187|0|600	2	58
ENSG00000132155.11|mRNA|RAF1|ENSG00000132155.11|ENSG00000132155.11|0|7847	2	67.5
ENSG00000106603.18|mRNA|COA1|ENSG00000106603.18|ENSG00000106603.18|0|11820	2	46.5
ENSG00000003436.15|mRNA|TFPI|ENSG00000003436.15|ENSG00000003436.15|0|11714	2	59
ENSG00000131979.18|mRNA|GCH1|ENSG00000131979.18|ENSG00000131979.18|0|2951	2	32.5
ENSG00000131725.13|mRNA|WDR44|ENSG00000131725.13|ENSG00000131725.13|0|4202	2	24.5
ENSG00000131724.10|mRNA|IL13RA1|ENSG00000131724.10|ENSG00000131724.10|0|4372	2	62
ENSG00000167578.17|mRNA|RAB4B|ENSG00000167578.17|ENSG00000167578.17|0|3931	2	51.5
ENSG00000214212.8|mRNA|C19orf38|ENSG00000214212.8|ENSG00000214212.8|0|1565	2	75.5
hsa_circ_0032959|circRNA|hsa_circ_0032959|hsa_circ_0032959|hsa_circ_0032959|0|286	2	50.5
ENSG00000167658.15|mRNA|EEF2|ENSG00000167658.15|ENSG00000167658.15|0|4027	2	80.5
ENSG00000185825.15|mRNA|BCAP31|ENSG00000185825.15|ENSG00000185825.15|0|2624	2	63
hsa_circ_0002748|circRNA|hsa_circ_0002748|hsa_circ_0002748|hsa_circ_0002748|0|600	2	16.5
hsa_circ_0034533|circRNA|hsa_circ_0034533|hsa_circ_0034533|hsa_circ_0034533|0|600	2	83.5
ENSG00000204323.5|mRNA|SMIM5|ENSG00000204323.5|ENSG00000204323.5|0|5117	2	30.5
ENSG00000105866.13|mRNA|SP4|ENSG00000105866.13|ENSG00000105866.13|0|6234	2	79
ENSG00000166681.13|mRNA|BEX3|ENSG00000166681.13|ENSG00000166681.13|0|1080	2	93.5
ENSG00000111445.13|mRNA|RFC5|ENSG00000111445.13|ENSG00000111445.13|0|3249	2	91.5
ENSG00000102898.11|mRNA|NUTF2|ENSG00000102898.11|ENSG00000102898.11|0|3895	2	57
ENSG00000086189.9|mRNA|DIMT1|ENSG00000086189.9|ENSG00000086189.9|0|3736	2	34.5
ENSG00000197948.10|mRNA|FCHSD1|ENSG00000197948.10|ENSG00000197948.10|0|6073	2	31
hsa_circ_0009009|circRNA|hsa_circ_0009009|hsa_circ_0009009|hsa_circ_0009009|0|506	2	52
ENSG00000176715.15|mRNA|ACSF3|ENSG00000176715.15|ENSG00000176715.15|0|11629	2	83
ENSG00000025156.12|mRNA|HSF2|ENSG00000025156.12|ENSG00000025156.12|0|2702	2	19.5
ENSG00000177030.16|mRNA|DEAF1|ENSG00000177030.16|ENSG00000177030.16|0|4452	2	75.5
ENSG00000101745.16|mRNA|ANKRD12|ENSG00000101745.16|ENSG00000101745.16|0|12252	2	55.5
ENSG00000023041.11|mRNA|ZDHHC6|ENSG00000023041.11|ENSG00000023041.11|0|3748	2	68
ENSG00000148606.12|mRNA|POLR3A|ENSG00000148606.12|ENSG00000148606.12|0|8917	2	45.5
hsa_circ_0067504|circRNA|hsa_circ_0067504|hsa_circ_0067504|hsa_circ_0067504|0|600	2	54
ENSG00000205240.4|pseudogene|OR7E36P|ENSG00000205240.4|ENSG00000205240.4|0|954	2	40.5
ENSG00000178035.11|mRNA|IMPDH2|ENSG00000178035.11|ENSG00000178035.11|0|2773	2	78
ENSG00000148158.16|mRNA|SNX30|ENSG00000148158.16|ENSG00000148158.16|0|11578	2	68
ENSG00000115514.11|mRNA|TXNDC9|ENSG00000115514.11|ENSG00000115514.11|0|2816	2	93
ENSG00000178149.16|mRNA|DALRD3|ENSG00000178149.16|ENSG00000178149.16|0|3682	2	49
ENSG00000178188.14|mRNA|SH2B1|ENSG00000178188.14|ENSG00000178188.14|0|7145	2	59.5
ENSG00000140416.19|mRNA|TPM1|ENSG00000140416.19|ENSG00000140416.19|0|12492	2	49
ENSG00000149532.15|mRNA|CPSF7|ENSG00000149532.15|ENSG00000149532.15|0|6036	2	70.5
hsa_circ_0009541|circRNA|hsa_circ_0009541|hsa_circ_0009541|hsa_circ_0009541|0|378	2	52
ENSG00000151651.15|mRNA|ADAM8|ENSG00000151651.15|ENSG00000151651.15|0|4780	2	60
ENSG00000267796.7|mRNA|LIN37|ENSG00000267796.7|ENSG00000267796.7|0|2820	2	44
ENSG00000152942.18|mRNA|RAD17|ENSG00000152942.18|ENSG00000152942.18|0|4159	2	85.5
ENSG00000075415.12|mRNA|SLC25A3|ENSG00000075415.12|ENSG00000075415.12|0|8896	2	61
hsa_circ_0042756|circRNA|hsa_circ_0042756|hsa_circ_0042756|hsa_circ_0042756|0|600	2	45
ENSG00000136261.14|mRNA|BZW2|ENSG00000136261.14|ENSG00000136261.14|0|3662	2	45
ENSG00000114125.13|mRNA|RNF7|ENSG00000114125.13|ENSG00000114125.13|0|3147	2	70
ENSG00000102445.18|mRNA|RUBCNL|ENSG00000102445.18|ENSG00000102445.18|0|6105	2	47
ENSG00000115042.9|mRNA|FAHD2A|ENSG00000115042.9|ENSG00000115042.9|0|5665	2	69
ENSG00000223482.7|lncRNA|NUTM2A-AS1|ENSG00000223482.7|ENSG00000223482.7|0|6851	2	69
ENSG00000225936.1|lncRNA|AL731557.1|ENSG00000225936.1|ENSG00000225936.1|0|744	2	62
ENSG00000102096.9|mRNA|PIM2|ENSG00000102096.9|ENSG00000102096.9|0|2761	2	56
ENSG00000118197.13|mRNA|DDX59|ENSG00000118197.13|ENSG00000118197.13|0|4470	2	72.5
ENSG00000176095.11|mRNA|IP6K1|ENSG00000176095.11|ENSG00000176095.11|0|5200	2	44
ENSG00000255823.4|mRNA|MTRNR2L8|ENSG00000255823.4|ENSG00000255823.4|0|1303	2	49.5
hsa_circ_0070806|circRNA|hsa_circ_0070806|hsa_circ_0070806|hsa_circ_0070806|0|600	2	76.5
ENSG00000205937.11|mRNA|RNPS1|ENSG00000205937.11|ENSG00000205937.11|0|8582	2	59
ENSG00000154174.7|mRNA|TOMM70|ENSG00000154174.7|ENSG00000154174.7|0|5387	2	54
ENSG00000259278.1|lncRNA|AC087878.1|ENSG00000259278.1|ENSG00000259278.1|0|574	2	43.5
hsa_circ_0085427|circRNA|hsa_circ_0085427|hsa_circ_0085427|hsa_circ_0085427|0|434	2	57
ENSG00000117143.13|mRNA|UAP1|ENSG00000117143.13|ENSG00000117143.13|0|3437	2	56
ENSG00000143947.13|mRNA|RPS27A|ENSG00000143947.13|ENSG00000143947.13|0|3130	2	98
hsa_circ_0069663|circRNA|hsa_circ_0069663|hsa_circ_0069663|hsa_circ_0069663|0|600	2	40.5
ENSG00000142867.12|mRNA|BCL10|ENSG00000142867.12|ENSG00000142867.12|0|2819	2	74.5
hsa_circ_0070504|circRNA|hsa_circ_0070504|hsa_circ_0070504|hsa_circ_0070504|0|600	2	54
ENSG00000196850.5|mRNA|PPTC7|ENSG00000196850.5|ENSG00000196850.5|0|5687	2	47
ENSG00000143106.12|mRNA|PSMA5|ENSG00000143106.12|ENSG00000143106.12|0|5724	2	67.5
ENSG00000101166.15|mRNA|PRELID3B|ENSG00000101166.15|ENSG00000101166.15|0|2977	2	60.5
hsa_circ_0008158|circRNA|hsa_circ_0008158|hsa_circ_0008158|hsa_circ_0008158|0|600	2	73
ENSG00000143442.21|mRNA|POGZ|ENSG00000143442.21|ENSG00000143442.21|0|10272	2	69
ENSG00000143384.12|mRNA|MCL1|ENSG00000143384.12|ENSG00000143384.12|0|4371	2	86
ENSG00000180304.14|mRNA|OAZ2|ENSG00000180304.14|ENSG00000180304.14|0|7671	2	88
ENSG00000205629.11|mRNA|LCMT1|ENSG00000205629.11|ENSG00000205629.11|0|2606	2	50.5
ENSG00000264023.1|lncRNA|AC068418.1|ENSG00000264023.1|ENSG00000264023.1|0|404	2	66
ENSG00000142541.16|mRNA|RPL13A|ENSG00000142541.16|ENSG00000142541.16|0|2369	2	88
ENSG00000179091.4|mRNA|CYC1|ENSG00000179091.4|ENSG00000179091.4|0|1975	2	43
ENSG00000116514.16|mRNA|RNF19B|ENSG00000116514.16|ENSG00000116514.16|0|2610	2	52
ENSG00000178878.12|mRNA|APOLD1|ENSG00000178878.12|ENSG00000178878.12|0|7243	2	62.5
ENSG00000147162.13|mRNA|OGT|ENSG00000147162.13|ENSG00000147162.13|0|9812	2	58.5
ENSG00000146826.16|mRNA|C7orf43|ENSG00000146826.16|ENSG00000146826.16|0|3255	2	67.5
ENSG00000259399.1|mRNA|TGIF2-C20orf24|ENSG00000259399.1|ENSG00000259399.1|0|918	2	60.5
ENSG00000146426.17|mRNA|TIAM2|ENSG00000146426.17|ENSG00000146426.17|0|11532	2	46
ENSG00000115561.15|mRNA|CHMP3|ENSG00000115561.15|ENSG00000115561.15|0|7018	2	77
ENSG00000146223.14|mRNA|RPL7L1|ENSG00000146223.14|ENSG00000146223.14|0|7809	2	40
hsa_circ_0008985|circRNA|hsa_circ_0008985|hsa_circ_0008985|hsa_circ_0008985|0|600	2	54.5
ENSG00000101336.13|mRNA|HCK|ENSG00000101336.13|ENSG00000101336.13|0|3092	2	75.5
ENSG00000023171.16|mRNA|GRAMD1B|ENSG00000023171.16|ENSG00000023171.16|0|14408	2	57.5
hsa_circ_0008983|circRNA|hsa_circ_0008983|hsa_circ_0008983|hsa_circ_0008983|0|600	2	58.5
hsa_circ_0070804|circRNA|hsa_circ_0070804|hsa_circ_0070804|hsa_circ_0070804|0|600	2	73
ENSG00000145592.13|mRNA|RPL37|ENSG00000145592.13|ENSG00000145592.13|0|8153	2	80
ENSG00000145416.13|mRNA|MARCH1|ENSG00000145416.13|ENSG00000145416.13|0|10421	2	60
ENSG00000115738.9|mRNA|ID2|ENSG00000115738.9|ENSG00000115738.9|0|2205	2	13.5
ENSG00000268439.5|mRNA|EMG1|ENSG00000268439.5|ENSG00000268439.5|0|1292	2	74.5
ENSG00000152082.13|mRNA|MZT2B|ENSG00000152082.13|ENSG00000152082.13|0|1815	2	41.5
ENSG00000204832.9|lncRNA|ST8SIA6-AS1|ENSG00000204832.9|ENSG00000204832.9|0|2022	2	56
hsa_circ_0066514|circRNA|hsa_circ_0066514|hsa_circ_0066514|hsa_circ_0066514|0|600	2	60
hsa_circ_0088057|circRNA|hsa_circ_0088057|hsa_circ_0088057|hsa_circ_0088057|0|600	2	35.5
ENSG00000183605.16|mRNA|SFXN4|ENSG00000183605.16|ENSG00000183605.16|0|1868	2	84
ENSG00000089356.18|mRNA|FXYD3|ENSG00000089356.18|ENSG00000089356.18|0|3334	2	29.5
ENSG00000137501.17|mRNA|SYTL2|ENSG00000137501.17|ENSG00000137501.17|0|11258	2	66
ENSG00000137460.8|mRNA|FHDC1|ENSG00000137460.8|ENSG00000137460.8|0|6593	2	29
ENSG00000158006.13|mRNA|PAFAH2|ENSG00000158006.13|ENSG00000158006.13|0|3835	2	42
ENSG00000250299.5|pseudogene|MRPS31P4|ENSG00000250299.5|ENSG00000250299.5|0|1000	2	69.5
ENSG00000112769.18|mRNA|LAMA4|ENSG00000112769.18|ENSG00000112769.18|0|11575	2	50
hsa_circ_0047922|circRNA|hsa_circ_0047922|hsa_circ_0047922|hsa_circ_0047922|0|600	2	64
ENSG00000225981.1|lncRNA|AC102953.1|ENSG00000225981.1|ENSG00000225981.1|0|498	2	72.5
ENSG00000158711.13|mRNA|ELK4|ENSG00000158711.13|ENSG00000158711.13|0|12142	2	65.5
ENSG00000137337.14|mRNA|MDC1|ENSG00000137337.14|ENSG00000137337.14|0|8064	2	84
ENSG00000217555.12|mRNA|CKLF|ENSG00000217555.12|ENSG00000217555.12|0|1161	2	21
ENSG00000198223.16|mRNA|CSF2RA|ENSG00000198223.16|ENSG00000198223.16|0|3830	2	59
ENSG00000005022.5|mRNA|SLC25A5|ENSG00000005022.5|ENSG00000005022.5|0|1500	2	64.5
ENSG00000158825.5|mRNA|CDA|ENSG00000158825.5|ENSG00000158825.5|0|963	2	72.5
ENSG00000159713.10|mRNA|TPPP3|ENSG00000159713.10|ENSG00000159713.10|0|2618	2	60.5
ENSG00000272573.5|mRNA|MUSTN1|ENSG00000272573.5|ENSG00000272573.5|0|902	2	71
ENSG00000160741.16|mRNA|CRTC2|ENSG00000160741.16|ENSG00000160741.16|0|3612	2	87.5
ENSG00000160695.14|mRNA|VPS11|ENSG00000160695.14|ENSG00000160695.14|0|5907	2	89
ENSG00000089280.18|mRNA|FUS|ENSG00000089280.18|ENSG00000089280.18|0|10283	2	52.5
ENSG00000159111.12|mRNA|MRPL10|ENSG00000159111.12|ENSG00000159111.12|0|2764	2	75
ENSG00000119820.10|mRNA|YIPF4|ENSG00000119820.10|ENSG00000119820.10|0|12233	2	71
ENSG00000159131.16|mRNA|GART|ENSG00000159131.16|ENSG00000159131.16|0|7751	2	38
ENSG00000272168.6|lncRNA|CASC15|ENSG00000272168.6|ENSG00000272168.6|0|13289	2	70
ENSG00000071082.10|mRNA|RPL31|ENSG00000071082.10|ENSG00000071082.10|0|5791	2	90.5
ENSG00000159202.17|mRNA|UBE2Z|ENSG00000159202.17|ENSG00000159202.17|0|5753	2	65.5
hsa_circ_0006388|circRNA|hsa_circ_0006388|hsa_circ_0006388|hsa_circ_0006388|0|600	2	45
ENSG00000224137.1|lncRNA|LINC01857|ENSG00000224137.1|ENSG00000224137.1|0|492	2	34.5
ENSG00000268573.1|lncRNA|AC011815.1|ENSG00000268573.1|ENSG00000268573.1|0|4382	2	57.5
ENSG00000138641.15|mRNA|HERC3|ENSG00000138641.15|ENSG00000138641.15|0|8634	2	61
ENSG00000088986.10|mRNA|DYNLL1|ENSG00000088986.10|ENSG00000088986.10|0|2957	2	54
ENSG00000206567.9|lncRNA|AC022007.1|ENSG00000206567.9|ENSG00000206567.9|0|2533	2	75
ENSG00000118922.17|mRNA|KLF12|ENSG00000118922.17|ENSG00000118922.17|0|10923	2	39
ENSG00000162086.14|mRNA|ZNF75A|ENSG00000162086.14|ENSG00000162086.14|0|8063	2	55
ENSG00000175463.11|mRNA|TBC1D10C|ENSG00000175463.11|ENSG00000175463.11|0|4993	2	55.5
ENSG00000119013.8|mRNA|NDUFB3|ENSG00000119013.8|ENSG00000119013.8|0|1103	2	76
hsa_circ_0010927|circRNA|hsa_circ_0010927|hsa_circ_0010927|hsa_circ_0010927|0|600	2	38.5
ENSG00000138375.12|mRNA|SMARCAL1|ENSG00000138375.12|ENSG00000138375.12|0|5092	2	54.5
ENSG00000111652.9|mRNA|COPS7A|ENSG00000111652.9|ENSG00000111652.9|0|3113	2	56
ENSG00000271601.3|mRNA|LIX1L|ENSG00000271601.3|ENSG00000271601.3|0|3975	2	64
ENSG00000182541.17|mRNA|LIMK2|ENSG00000182541.17|ENSG00000182541.17|0|6170	2	55
ENSG00000182718.16|mRNA|ANXA2|ENSG00000182718.16|ENSG00000182718.16|0|8824	2	87.5
ENSG00000113269.13|mRNA|RNF130|ENSG00000113269.13|ENSG00000113269.13|0|12822	2	45
ENSG00000156299.13|mRNA|TIAM1|ENSG00000156299.13|ENSG00000156299.13|0|9216	2	72
ENSG00000249992.1|mRNA|TMEM158|ENSG00000249992.1|ENSG00000249992.1|0|1813	2	45.5
ENSG00000089818.17|mRNA|NECAP1|ENSG00000089818.17|ENSG00000089818.17|0|8763	2	83.5
ENSG00000136463.7|mRNA|TACO1|ENSG00000136463.7|ENSG00000136463.7|0|2315	2	58
ENSG00000138073.13|mRNA|PREB|ENSG00000138073.13|ENSG00000138073.13|0|3221	2	47
ENSG00000270149.5|mRNA|AL591806.3|ENSG00000270149.5|ENSG00000270149.5|0|2114	2	32
ENSG00000250073.2|lncRNA|AP000866.2|ENSG00000250073.2|ENSG00000250073.2|0|1538	2	23
ENSG00000119242.8|mRNA|CCDC92|ENSG00000119242.8|ENSG00000119242.8|0|8223	2	42
ENSG00000159348.12|mRNA|CYB5R1|ENSG00000159348.12|ENSG00000159348.12|0|4504	2	41.5
ENSG00000204392.10|mRNA|LSM2|ENSG00000204392.10|ENSG00000204392.10|0|1077	1	98
ENSG00000205531.12|mRNA|NAP1L4|ENSG00000205531.12|ENSG00000205531.12|0|5200	1	36
ENSG00000213923.11|mRNA|CSNK1E|ENSG00000213923.11|ENSG00000213923.11|0|6246	1	37
hsa_circ_0089902|circRNA|hsa_circ_0089902|hsa_circ_0089902|hsa_circ_0089902|0|600	1	74
ENSG00000228409.6|pseudogene|CCT6P1|ENSG00000228409.6|ENSG00000228409.6|0|1670	1	87
ENSG00000215483.10|lncRNA|LINC00598|ENSG00000215483.10|ENSG00000215483.10|0|18352	1	98
hsa_circ_0088060|circRNA|hsa_circ_0088060|hsa_circ_0088060|hsa_circ_0088060|0|600	1	71
ENSG00000204713.10|mRNA|TRIM27|ENSG00000204713.10|ENSG00000204713.10|0|7986	1	99
hsa_circ_0091360|circRNA|hsa_circ_0091360|hsa_circ_0091360|hsa_circ_0091360|0|600	1	11
ENSG00000224805.2|lncRNA|LINC00853|ENSG00000224805.2|ENSG00000224805.2|0|661	1	24
ENSG00000205250.8|mRNA|E2F4|ENSG00000205250.8|ENSG00000205250.8|0|3582	1	4
ENSG00000214106.7|lncRNA|PAXIP1-AS2|ENSG00000214106.7|ENSG00000214106.7|0|2974	1	93
ENSG00000220804.8|pseudogene|LINC01881|ENSG00000220804.8|ENSG00000220804.8|0|1931	1	67
ENSG00000213625.8|mRNA|LEPROT|ENSG00000213625.8|ENSG00000213625.8|0|5237	1	94
ENSG00000227678.7|lncRNA|AL355581.1|ENSG00000227678.7|ENSG00000227678.7|0|2906	1	32
ENSG00000205189.11|mRNA|ZBTB10|ENSG00000205189.11|ENSG00000205189.11|0|10216	1	51
ENSG00000204463.12|mRNA|BAG6|ENSG00000204463.12|ENSG00000204463.12|0|5310	1	39
ENSG00000206047.2|mRNA|DEFA1|ENSG00000206047.2|ENSG00000206047.2|0|486	1	47
ENSG00000225528.3|mRNA|Z82206.1|ENSG00000225528.3|ENSG00000225528.3|0|1322	1	99
hsa_circ_0085314|circRNA|hsa_circ_0085314|hsa_circ_0085314|hsa_circ_0085314|0|600	1	47
ENSG00000214160.9|mRNA|ALG3|ENSG00000214160.9|ENSG00000214160.9|0|3464	1	46
ENSG00000226824.6|lncRNA|AC006001.2|ENSG00000226824.6|ENSG00000226824.6|0|938	1	15
ENSG00000224397.5|lncRNA|SMIM25|ENSG00000224397.5|ENSG00000224397.5|0|2451	1	94
ENSG00000214050.7|mRNA|FBXO16|ENSG00000214050.7|ENSG00000214050.7|0|3972	1	68
hsa_circ_0084706|circRNA|hsa_circ_0084706|hsa_circ_0084706|hsa_circ_0084706|0|600	1	13
hsa_circ_0084164|circRNA|hsa_circ_0084164|hsa_circ_0084164|hsa_circ_0084164|0|600	1	51
ENSG00000217258.2|lncRNA|AC007249.1|ENSG00000217258.2|ENSG00000217258.2|0|494	1	50
ENSG00000224786.2|pseudogene|CETN4P|ENSG00000224786.2|ENSG00000224786.2|0|3858	1	61
ENSG00000216490.3|mRNA|IFI30|ENSG00000216490.3|ENSG00000216490.3|0|2481	1	10
hsa_circ_0084785|circRNA|hsa_circ_0084785|hsa_circ_0084785|hsa_circ_0084785|0|390	1	21
ENSG00000215277.8|mRNA|RNF212B|ENSG00000215277.8|ENSG00000215277.8|0|2059	1	35
ENSG00000211450.9|mRNA|SELENOH|ENSG00000211450.9|ENSG00000211450.9|0|2305	1	43
ENSG00000213977.7|mRNA|TAX1BP3|ENSG00000213977.7|ENSG00000213977.7|0|1383	1	57
hsa_circ_0037010|circRNA|hsa_circ_0037010|hsa_circ_0037010|hsa_circ_0037010|0|600	1	16
ENSG00000228878.7|lncRNA|SEPT7-AS1|ENSG00000228878.7|ENSG00000228878.7|0|4051	1	15
hsa_circ_0003064|circRNA|hsa_circ_0003064|hsa_circ_0003064|hsa_circ_0003064|0|600	1	44
hsa_circ_0003290|circRNA|hsa_circ_0003290|hsa_circ_0003290|hsa_circ_0003290|0|340	1	49
hsa_circ_0003376|circRNA|hsa_circ_0003376|hsa_circ_0003376|hsa_circ_0003376|0|516	1	65
hsa_circ_0003390|circRNA|hsa_circ_0003390|hsa_circ_0003390|hsa_circ_0003390|0|600	1	93
hsa_circ_0003419|circRNA|hsa_circ_0003419|hsa_circ_0003419|hsa_circ_0003419|0|600	1	26
hsa_circ_0055120|circRNA|hsa_circ_0055120|hsa_circ_0055120|hsa_circ_0055120|0|504	1	61
hsa_circ_0003647|circRNA|hsa_circ_0003647|hsa_circ_0003647|hsa_circ_0003647|0|600	1	86
hsa_circ_0003721|circRNA|hsa_circ_0003721|hsa_circ_0003721|hsa_circ_0003721|0|600	1	92
hsa_circ_0003769|circRNA|hsa_circ_0003769|hsa_circ_0003769|hsa_circ_0003769|0|600	1	85
hsa_circ_0055019|circRNA|hsa_circ_0055019|hsa_circ_0055019|hsa_circ_0055019|0|600	1	33
hsa_circ_0004072|circRNA|hsa_circ_0004072|hsa_circ_0004072|hsa_circ_0004072|0|600	1	40
hsa_circ_0052750|circRNA|hsa_circ_0052750|hsa_circ_0052750|hsa_circ_0052750|0|600	1	88
hsa_circ_0004441|circRNA|hsa_circ_0004441|hsa_circ_0004441|hsa_circ_0004441|0|600	1	59
hsa_circ_0004691|circRNA|hsa_circ_0004691|hsa_circ_0004691|hsa_circ_0004691|0|536	1	72
hsa_circ_0004863|circRNA|hsa_circ_0004863|hsa_circ_0004863|hsa_circ_0004863|0|356	1	99
hsa_circ_0004972|circRNA|hsa_circ_0004972|hsa_circ_0004972|hsa_circ_0004972|0|600	1	21
hsa_circ_0005181|circRNA|hsa_circ_0005181|hsa_circ_0005181|hsa_circ_0005181|0|600	1	44
hsa_circ_0005440|circRNA|hsa_circ_0005440|hsa_circ_0005440|hsa_circ_0005440|0|356	1	63
hsa_circ_0005615|circRNA|hsa_circ_0005615|hsa_circ_0005615|hsa_circ_0005615|0|600	1	72
hsa_circ_0006034|circRNA|hsa_circ_0006034|hsa_circ_0006034|hsa_circ_0006034|0|600	1	30
hsa_circ_0003166|circRNA|hsa_circ_0003166|hsa_circ_0003166|hsa_circ_0003166|0|566	1	17
hsa_circ_0003032|circRNA|hsa_circ_0003032|hsa_circ_0003032|hsa_circ_0003032|0|600	1	79
hsa_circ_0006518|circRNA|hsa_circ_0006518|hsa_circ_0006518|hsa_circ_0006518|0|518	1	42
hsa_circ_0003029|circRNA|hsa_circ_0003029|hsa_circ_0003029|hsa_circ_0003029|0|600	1	57
ENSG00000283164.1|lncRNA|AC012507.4|ENSG00000283164.1|ENSG00000283164.1|0|504	1	88
ENSG00000283757.1|lncRNA|AL031686.1|ENSG00000283757.1|ENSG00000283757.1|0|4273	1	48
hsa_circ_0061555|circRNA|hsa_circ_0061555|hsa_circ_0061555|hsa_circ_0061555|0|600	1	18
ENSG00000284431.1|mRNA|AL022238.4|ENSG00000284431.1|ENSG00000284431.1|0|4563	1	37
hsa_circ_0000116|circRNA|hsa_circ_0000116|hsa_circ_0000116|hsa_circ_0000116|0|600	1	60
hsa_circ_0000117|circRNA|hsa_circ_0000117|hsa_circ_0000117|hsa_circ_0000117|0|600	1	33
hsa_circ_0000211|circRNA|hsa_circ_0000211|hsa_circ_0000211|hsa_circ_0000211|0|600	1	73
hsa_circ_0061389|circRNA|hsa_circ_0061389|hsa_circ_0061389|hsa_circ_0061389|0|356	1	79
hsa_circ_0000567|circRNA|hsa_circ_0000567|hsa_circ_0000567|hsa_circ_0000567|0|600	1	56
hsa_circ_0000652|circRNA|hsa_circ_0000652|hsa_circ_0000652|hsa_circ_0000652|0|528	1	77
hsa_circ_0000711|circRNA|hsa_circ_0000711|hsa_circ_0000711|hsa_circ_0000711|0|600	1	88
hsa_circ_0001350|circRNA|hsa_circ_0001350|hsa_circ_0001350|hsa_circ_0001350|0|600	1	63
hsa_circ_0001483|circRNA|hsa_circ_0001483|hsa_circ_0001483|hsa_circ_0001483|0|600	1	57
hsa_circ_0001485|circRNA|hsa_circ_0001485|hsa_circ_0001485|hsa_circ_0001485|0|600	1	39
hsa_circ_0001949|circRNA|hsa_circ_0001949|hsa_circ_0001949|hsa_circ_0001949|0|438	1	56
hsa_circ_0002670|circRNA|hsa_circ_0002670|hsa_circ_0002670|hsa_circ_0002670|0|600	1	78
hsa_circ_0060236|circRNA|hsa_circ_0060236|hsa_circ_0060236|hsa_circ_0060236|0|600	1	72
hsa_circ_0002941|circRNA|hsa_circ_0002941|hsa_circ_0002941|hsa_circ_0002941|0|600	1	61
hsa_circ_0057957|circRNA|hsa_circ_0057957|hsa_circ_0057957|hsa_circ_0057957|0|600	1	55
hsa_circ_0006156|circRNA|hsa_circ_0006156|hsa_circ_0006156|hsa_circ_0006156|0|600	1	58
hsa_circ_0051849|circRNA|hsa_circ_0051849|hsa_circ_0051849|hsa_circ_0051849|0|236	1	82
ENSG00000283088.1|mRNA|AC010487.3|ENSG00000283088.1|ENSG00000283088.1|0|1966	1	88
hsa_circ_0017359|circRNA|hsa_circ_0017359|hsa_circ_0017359|hsa_circ_0017359|0|590	1	6
hsa_circ_0017925|circRNA|hsa_circ_0017925|hsa_circ_0017925|hsa_circ_0017925|0|600	1	68
hsa_circ_0018652|circRNA|hsa_circ_0018652|hsa_circ_0018652|hsa_circ_0018652|0|348	1	40
hsa_circ_0018728|circRNA|hsa_circ_0018728|hsa_circ_0018728|hsa_circ_0018728|0|600	1	91
hsa_circ_0042519|circRNA|hsa_circ_0042519|hsa_circ_0042519|hsa_circ_0042519|0|600	1	33
hsa_circ_0018815|circRNA|hsa_circ_0018815|hsa_circ_0018815|hsa_circ_0018815|0|600	1	61
hsa_circ_0020017|circRNA|hsa_circ_0020017|hsa_circ_0020017|hsa_circ_0020017|0|600	1	69
hsa_circ_0020537|circRNA|hsa_circ_0020537|hsa_circ_0020537|hsa_circ_0020537|0|600	1	76
hsa_circ_0021274|circRNA|hsa_circ_0021274|hsa_circ_0021274|hsa_circ_0021274|0|600	1	26
hsa_circ_0042517|circRNA|hsa_circ_0042517|hsa_circ_0042517|hsa_circ_0042517|0|600	1	24
hsa_circ_0028078|circRNA|hsa_circ_0028078|hsa_circ_0028078|hsa_circ_0028078|0|364	1	73
hsa_circ_0028278|circRNA|hsa_circ_0028278|hsa_circ_0028278|hsa_circ_0028278|0|600	1	19
hsa_circ_0029894|circRNA|hsa_circ_0029894|hsa_circ_0029894|hsa_circ_0029894|0|600	1	60
hsa_circ_0032097|circRNA|hsa_circ_0032097|hsa_circ_0032097|hsa_circ_0032097|0|600	1	81
hsa_circ_0032266|circRNA|hsa_circ_0032266|hsa_circ_0032266|hsa_circ_0032266|0|600	1	7
hsa_circ_0032323|circRNA|hsa_circ_0032323|hsa_circ_0032323|hsa_circ_0032323|0|600	1	80
hsa_circ_0039655|circRNA|hsa_circ_0039655|hsa_circ_0039655|hsa_circ_0039655|0|600	1	48
hsa_circ_0039299|circRNA|hsa_circ_0039299|hsa_circ_0039299|hsa_circ_0039299|0|600	1	84
hsa_circ_0035052|circRNA|hsa_circ_0035052|hsa_circ_0035052|hsa_circ_0035052|0|600	1	89
hsa_circ_0039288|circRNA|hsa_circ_0039288|hsa_circ_0039288|hsa_circ_0039288|0|600	1	96
hsa_circ_0017922|circRNA|hsa_circ_0017922|hsa_circ_0017922|hsa_circ_0017922|0|600	1	98
hsa_circ_0015242|circRNA|hsa_circ_0015242|hsa_circ_0015242|hsa_circ_0015242|0|600	1	19
hsa_circ_0006588|circRNA|hsa_circ_0006588|hsa_circ_0006588|hsa_circ_0006588|0|600	1	12
hsa_circ_0014632|circRNA|hsa_circ_0014632|hsa_circ_0014632|hsa_circ_0014632|0|600	1	18
hsa_circ_0006962|circRNA|hsa_circ_0006962|hsa_circ_0006962|hsa_circ_0006962|0|600	1	54
hsa_circ_0007265|circRNA|hsa_circ_0007265|hsa_circ_0007265|hsa_circ_0007265|0|600	1	61
hsa_circ_0007271|circRNA|hsa_circ_0007271|hsa_circ_0007271|hsa_circ_0007271|0|600	1	90
hsa_circ_0007661|circRNA|hsa_circ_0007661|hsa_circ_0007661|hsa_circ_0007661|0|600	1	58
hsa_circ_0007798|circRNA|hsa_circ_0007798|hsa_circ_0007798|hsa_circ_0007798|0|600	1	57
hsa_circ_0007912|circRNA|hsa_circ_0007912|hsa_circ_0007912|hsa_circ_0007912|0|600	1	84
hsa_circ_0008239|circRNA|hsa_circ_0008239|hsa_circ_0008239|hsa_circ_0008239|0|600	1	33
hsa_circ_0008432|circRNA|hsa_circ_0008432|hsa_circ_0008432|hsa_circ_0008432|0|504	1	33
hsa_circ_0008463|circRNA|hsa_circ_0008463|hsa_circ_0008463|hsa_circ_0008463|0|600	1	41
hsa_circ_0046900|circRNA|hsa_circ_0046900|hsa_circ_0046900|hsa_circ_0046900|0|578	1	71
hsa_circ_0008768|circRNA|hsa_circ_0008768|hsa_circ_0008768|hsa_circ_0008768|0|600	1	93
hsa_circ_0008952|circRNA|hsa_circ_0008952|hsa_circ_0008952|hsa_circ_0008952|0|600	1	46
hsa_circ_0008992|circRNA|hsa_circ_0008992|hsa_circ_0008992|hsa_circ_0008992|0|498	1	72
hsa_circ_0042806|circRNA|hsa_circ_0042806|hsa_circ_0042806|hsa_circ_0042806|0|600	1	80
hsa_circ_0042757|circRNA|hsa_circ_0042757|hsa_circ_0042757|hsa_circ_0042757|0|600	1	64
hsa_circ_0010042|circRNA|hsa_circ_0010042|hsa_circ_0010042|hsa_circ_0010042|0|600	1	91
hsa_circ_0010467|circRNA|hsa_circ_0010467|hsa_circ_0010467|hsa_circ_0010467|0|600	1	68
hsa_circ_0012474|circRNA|hsa_circ_0012474|hsa_circ_0012474|hsa_circ_0012474|0|470	1	68
hsa_circ_0013998|circRNA|hsa_circ_0013998|hsa_circ_0013998|hsa_circ_0013998|0|600	1	98
ENSG00000283149.1|mRNA|AC068631.2|ENSG00000283149.1|ENSG00000283149.1|0|501	1	56
hsa_circ_0063179|circRNA|hsa_circ_0063179|hsa_circ_0063179|hsa_circ_0063179|0|600	1	3
hsa_circ_0081467|circRNA|hsa_circ_0081467|hsa_circ_0081467|hsa_circ_0081467|0|464	1	14
ENSG00000241343.9|mRNA|RPL36A|ENSG00000241343.9|ENSG00000241343.9|0|3964	1	64
hsa_circ_0075806|circRNA|hsa_circ_0075806|hsa_circ_0075806|hsa_circ_0075806|0|600	1	83
ENSG00000243646.9|mRNA|IL10RB|ENSG00000243646.9|ENSG00000243646.9|0|4548	1	49
ENSG00000246225.6|lncRNA|AC006299.1|ENSG00000246225.6|ENSG00000246225.6|0|2421	1	71
ENSG00000247077.6|mRNA|PGAM5|ENSG00000247077.6|ENSG00000247077.6|0|3952	1	75
ENSG00000247345.2|lncRNA|AC092343.1|ENSG00000247345.2|ENSG00000247345.2|0|729	1	59
hsa_circ_0075675|circRNA|hsa_circ_0075675|hsa_circ_0075675|hsa_circ_0075675|0|600	1	1
hsa_circ_0074486|circRNA|hsa_circ_0074486|hsa_circ_0074486|hsa_circ_0074486|0|600	1	17
ENSG00000248751.6|mRNA|AC004997.1|ENSG00000248751.6|ENSG00000248751.6|0|2057	1	41
ENSG00000248871.1|mRNA|TNFSF12-TNFSF13|ENSG00000248871.1|ENSG00000248871.1|0|1816	1	90
ENSG00000248905.8|mRNA|FMN1|ENSG00000248905.8|ENSG00000248905.8|0|20084	1	89
ENSG00000249624.8|mRNA|AP000295.1|ENSG00000249624.8|ENSG00000249624.8|0|1000	1	44
hsa_circ_0072597|circRNA|hsa_circ_0072597|hsa_circ_0072597|hsa_circ_0072597|0|600	1	89
hsa_circ_0072595|circRNA|hsa_circ_0072595|hsa_circ_0072595|hsa_circ_0072595|0|350	1	55
hsa_circ_0072594|circRNA|hsa_circ_0072594|hsa_circ_0072594|hsa_circ_0072594|0|600	1	44
ENSG00000251435.1|pseudogene|C1GALT1P2|ENSG00000251435.1|ENSG00000251435.1|0|1104	1	99
ENSG00000251513.2|lncRNA|LIX1-AS1|ENSG00000251513.2|ENSG00000251513.2|0|1793	1	57
ENSG00000254703.2|lncRNA|SENCR|ENSG00000254703.2|ENSG00000254703.2|0|1298	1	70
hsa_circ_0072513|circRNA|hsa_circ_0072513|hsa_circ_0072513|hsa_circ_0072513|0|600	1	9
hsa_circ_0071124|circRNA|hsa_circ_0071124|hsa_circ_0071124|hsa_circ_0071124|0|320	1	80
ENSG00000242498.7|mRNA|ARPIN|ENSG00000242498.7|ENSG00000242498.7|0|8594	1	97
ENSG00000240497.2|lncRNA|AC092919.1|ENSG00000240497.2|ENSG00000240497.2|0|229	1	67
ENSG00000255363.2|lncRNA|AP001189.5|ENSG00000255363.2|ENSG00000255363.2|0|1725	1	88
ENSG00000240040.6|lncRNA|AC244205.1|ENSG00000240040.6|ENSG00000240040.6|0|705	1	98
ENSG00000231725.1|pseudogene|VN1R110P|ENSG00000231725.1|ENSG00000231725.1|0|971	1	79
ENSG00000232119.7|mRNA|MCTS1|ENSG00000232119.7|ENSG00000232119.7|0|2837	1	35
ENSG00000232388.4|mRNA|SMIM26|ENSG00000232388.4|ENSG00000232388.4|0|1098	1	58
ENSG00000233766.7|lncRNA|AC098617.1|ENSG00000233766.7|ENSG00000233766.7|0|5155	1	23
hsa_circ_0080856|circRNA|hsa_circ_0080856|hsa_circ_0080856|hsa_circ_0080856|0|600	1	57
ENSG00000234456.7|lncRNA|MAGI2-AS3|ENSG00000234456.7|ENSG00000234456.7|0|11625	1	34
ENSG00000234741.7|lncRNA|GAS5|ENSG00000234741.7|ENSG00000234741.7|0|3631	1	95
ENSG00000234927.1|pseudogene|HMGN1P18|ENSG00000234927.1|ENSG00000234927.1|0|277	1	91
ENSG00000235162.8|mRNA|C12orf75|ENSG00000235162.8|ENSG00000235162.8|0|2693	1	56
hsa_circ_0080483|circRNA|hsa_circ_0080483|hsa_circ_0080483|hsa_circ_0080483|0|600	1	70
ENSG00000235505.7|pseudogene|AP002004.1|ENSG00000235505.7|ENSG00000235505.7|0|4307	1	80
ENSG00000235802.1|lncRNA|HCFC1-AS1|ENSG00000235802.1|ENSG00000235802.1|0|350	1	71
ENSG00000236333.3|lncRNA|TRHDE-AS1|ENSG00000236333.3|ENSG00000236333.3|0|8781	1	67
hsa_circ_0080363|circRNA|hsa_circ_0080363|hsa_circ_0080363|hsa_circ_0080363|0|514	1	94
ENSG00000236397.3|pseudogene|DDX11L2|ENSG00000236397.3|ENSG00000236397.3|0|1398	1	44
ENSG00000236671.7|lncRNA|PRKG1-AS1|ENSG00000236671.7|ENSG00000236671.7|0|2873	1	79
ENSG00000237854.3|pseudogene|LINC00674|ENSG00000237854.3|ENSG00000237854.3|0|734	1	81
ENSG00000239883.8|pseudogene|PARGP1|ENSG00000239883.8|ENSG00000239883.8|0|3214	1	67
ENSG00000240005.5|lncRNA|AC106047.1|ENSG00000240005.5|ENSG00000240005.5|0|589	1	92
ENSG00000255028.5|lncRNA|AP003049.2|ENSG00000255028.5|ENSG00000255028.5|0|1091	1	80
hsa_circ_0071036|circRNA|hsa_circ_0071036|hsa_circ_0071036|hsa_circ_0071036|0|472	1	32
hsa_circ_0064374|circRNA|hsa_circ_0064374|hsa_circ_0064374|hsa_circ_0064374|0|600	1	87
hsa_circ_0068366|circRNA|hsa_circ_0068366|hsa_circ_0068366|hsa_circ_0068366|0|600	1	58
ENSG00000265590.9|mRNA|AP000275.2|ENSG00000265590.9|ENSG00000265590.9|0|1026	1	28
ENSG00000266472.5|mRNA|MRPS21|ENSG00000266472.5|ENSG00000266472.5|0|1641	1	28
ENSG00000266728.5|mRNA|AC015688.5|ENSG00000266728.5|ENSG00000266728.5|0|730	1	87
ENSG00000266820.1|pseudogene|KPNA2P3|ENSG00000266820.1|ENSG00000266820.1|0|848	1	98
ENSG00000267279.1|lncRNA|AC090409.1|ENSG00000267279.1|ENSG00000267279.1|0|1199	1	95
ENSG00000267426.5|mRNA|AC087289.3|ENSG00000267426.5|ENSG00000267426.5|0|5062	1	94
ENSG00000267506.5|lncRNA|AC021683.2|ENSG00000267506.5|ENSG00000267506.5|0|5079	1	12
ENSG00000268173.3|mRNA|AC007192.1|ENSG00000268173.3|ENSG00000268173.3|0|5142	1	82
hsa_circ_0067047|circRNA|hsa_circ_0067047|hsa_circ_0067047|hsa_circ_0067047|0|600	1	16
ENSG00000269242.1|mRNA|AC010422.3|ENSG00000269242.1|ENSG00000269242.1|0|838	1	72
ENSG00000270316.1|mRNA|BORCS7-ASMT|ENSG00000270316.1|ENSG00000270316.1|0|2670	1	86
ENSG00000271853.5|lncRNA|AL162258.1|ENSG00000271853.5|ENSG00000271853.5|0|995	1	65
ENSG00000272053.1|lncRNA|AL160400.1|ENSG00000272053.1|ENSG00000272053.1|0|1030	1	81
ENSG00000272288.5|lncRNA|AL451165.2|ENSG00000272288.5|ENSG00000272288.5|0|771	1	61
ENSG00000272679.1|lncRNA|AL355987.2|ENSG00000272679.1|ENSG00000272679.1|0|561	1	35
ENSG00000204316.12|mRNA|MRPL38|ENSG00000204316.12|ENSG00000204316.12|0|3663	1	30
ENSG00000272921.1|mRNA|AC005832.4|ENSG00000272921.1|ENSG00000272921.1|0|818	1	58
hsa_circ_0066535|circRNA|hsa_circ_0066535|hsa_circ_0066535|hsa_circ_0066535|0|600	1	39
ENSG00000273729.1|lncRNA|AC007686.3|ENSG00000273729.1|ENSG00000273729.1|0|3487	1	71
ENSG00000265491.4|mRNA|RNF115|ENSG00000265491.4|ENSG00000265491.4|0|11041	1	70
ENSG00000264187.1|mRNA|AC055811.2|ENSG00000264187.1|ENSG00000264187.1|0|1693	1	40
ENSG00000255717.6|lncRNA|SNHG1|ENSG00000255717.6|ENSG00000255717.6|0|3756	1	57
ENSG00000263798.2|lncRNA|AC018521.1|ENSG00000263798.2|ENSG00000263798.2|0|2801	1	70
ENSG00000255723.1|lncRNA|AC108516.2|ENSG00000255723.1|ENSG00000255723.1|0|349	1	24
ENSG00000256594.8|pseudogene|AC010186.2|ENSG00000256594.8|ENSG00000256594.8|0|2825	1	38
ENSG00000257529.5|mRNA|RPL36A-HNRNPH2|ENSG00000257529.5|ENSG00000257529.5|0|695	1	26
ENSG00000258064.1|mRNA|AC073612.1|ENSG00000258064.1|ENSG00000258064.1|0|771	1	47
ENSG00000258422.5|lncRNA|AL160191.1|ENSG00000258422.5|ENSG00000258422.5|0|1109	1	62
ENSG00000258551.5|lncRNA|CRAT37|ENSG00000258551.5|ENSG00000258551.5|0|2609	1	75
ENSG00000258644.5|mRNA|SYNJ2BP-COX16|ENSG00000258644.5|ENSG00000258644.5|0|1404	1	82
ENSG00000258791.7|lncRNA|LINC00520|ENSG00000258791.7|ENSG00000258791.7|0|2462	1	90
hsa_circ_0071030|circRNA|hsa_circ_0071030|hsa_circ_0071030|hsa_circ_0071030|0|600	1	16
ENSG00000259112.2|mRNA|NDUFC2-KCTD14|ENSG00000259112.2|ENSG00000259112.2|0|826	1	65
ENSG00000259115.1|lncRNA|AL357153.3|ENSG00000259115.1|ENSG00000259115.1|0|611	1	74
ENSG00000259132.1|mRNA|AL132780.3|ENSG00000259132.1|ENSG00000259132.1|0|835	1	73
hsa_circ_0038725|circRNA|hsa_circ_0038725|hsa_circ_0038725|hsa_circ_0038725|0|600	1	6
ENSG00000260007.2|mRNA|AC107871.1|ENSG00000260007.2|ENSG00000260007.2|0|7135	1	71
ENSG00000260238.6|mRNA|PMF1-BGLAP|ENSG00000260238.6|ENSG00000260238.6|0|1007	1	55
hsa_circ_0070803|circRNA|hsa_circ_0070803|hsa_circ_0070803|hsa_circ_0070803|0|600	1	71
ENSG00000260479.1|lncRNA|AC009145.1|ENSG00000260479.1|ENSG00000260479.1|0|433	1	19
ENSG00000261416.1|lncRNA|AC012645.3|ENSG00000261416.1|ENSG00000261416.1|0|811	1	73
ENSG00000263020.6|mRNA|AL662899.3|ENSG00000263020.6|ENSG00000263020.6|0|2524	1	51
ENSG00000272917.1|lncRNA|AC010186.4|ENSG00000272917.1|ENSG00000272917.1|0|615	1	95
ENSG00000159579.13|mRNA|RSPRY1|ENSG00000159579.13|ENSG00000159579.13|0|6064	1	92
ENSG00000204136.10|pseudogene|GGTA1P|ENSG00000204136.10|ENSG00000204136.10|0|4501	1	94
ENSG00000198918.7|mRNA|RPL39|ENSG00000198918.7|ENSG00000198918.7|0|2141	1	68
ENSG00000117226.11|mRNA|GBP3|ENSG00000117226.11|ENSG00000117226.11|0|4297	1	49
ENSG00000117318.8|mRNA|ID3|ENSG00000117318.8|ENSG00000117318.8|0|1797	1	43
ENSG00000117360.12|mRNA|PRPF3|ENSG00000117360.12|ENSG00000117360.12|0|5373	1	26
ENSG00000117724.12|mRNA|CENPF|ENSG00000117724.12|ENSG00000117724.12|0|11690	1	34
ENSG00000117748.9|mRNA|RPA2|ENSG00000117748.9|ENSG00000117748.9|0|2019	1	85
ENSG00000118515.11|mRNA|SGK1|ENSG00000118515.11|ENSG00000118515.11|0|9992	1	91
ENSG00000118520.14|mRNA|ARG1|ENSG00000118520.14|ENSG00000118520.14|0|1965	1	71
ENSG00000118816.9|mRNA|CCNI|ENSG00000118816.9|ENSG00000118816.9|0|3741	1	93
ENSG00000119185.12|mRNA|ITGB1BP1|ENSG00000119185.12|ENSG00000119185.12|0|6678	1	82
ENSG00000119471.14|mRNA|HSDL2|ENSG00000119471.14|ENSG00000119471.14|0|3455	1	78
ENSG00000119705.9|mRNA|SLIRP|ENSG00000119705.9|ENSG00000119705.9|0|2631	1	47
ENSG00000119778.14|mRNA|ATAD2B|ENSG00000119778.14|ENSG00000119778.14|0|10492	1	96
ENSG00000119801.12|mRNA|YPEL5|ENSG00000119801.12|ENSG00000119801.12|0|3421	1	79
ENSG00000120129.5|mRNA|DUSP1|ENSG00000120129.5|ENSG00000120129.5|0|2019	1	91
ENSG00000120437.8|mRNA|ACAT2|ENSG00000120437.8|ENSG00000120437.8|0|4299	1	47
ENSG00000120963.11|mRNA|ZNF706|ENSG00000120963.11|ENSG00000120963.11|0|7393	1	42
ENSG00000121552.3|mRNA|CSTA|ENSG00000121552.3|ENSG00000121552.3|0|1373	1	51
ENSG00000121766.15|mRNA|ZCCHC17|ENSG00000121766.15|ENSG00000121766.15|0|1921	1	28
ENSG00000121895.7|mRNA|TMEM156|ENSG00000121895.7|ENSG00000121895.7|0|2562	1	72
ENSG00000121989.14|mRNA|ACVR2A|ENSG00000121989.14|ENSG00000121989.14|0|6770	1	96
ENSG00000122643.18|mRNA|NT5C3A|ENSG00000122643.18|ENSG00000122643.18|0|3493	1	87
ENSG00000122741.15|mRNA|DCAF10|ENSG00000122741.15|ENSG00000122741.15|0|8492	1	36
ENSG00000122786.19|mRNA|CALD1|ENSG00000122786.19|ENSG00000122786.19|0|9843	1	19
ENSG00000123505.15|mRNA|AMD1|ENSG00000123505.15|ENSG00000123505.15|0|7027	1	67
ENSG00000124191.17|mRNA|TOX2|ENSG00000124191.17|ENSG00000124191.17|0|3223	1	60
ENSG00000117174.10|mRNA|ZNHIT6|ENSG00000117174.10|ENSG00000117174.10|0|6197	1	81
ENSG00000117133.10|mRNA|RPF1|ENSG00000117133.10|ENSG00000117133.10|0|1728	1	67
ENSG00000116991.10|mRNA|SIPA1L2|ENSG00000116991.10|ENSG00000116991.10|0|7641	1	99
ENSG00000113615.12|mRNA|SEC24A|ENSG00000113615.12|ENSG00000113615.12|0|7201	1	22
ENSG00000111666.10|mRNA|CHPT1|ENSG00000111666.10|ENSG00000111666.10|0|6004	1	86
ENSG00000111725.10|mRNA|PRKAB1|ENSG00000111725.10|ENSG00000111725.10|0|6246	1	76
ENSG00000112297.14|mRNA|CRYBG1|ENSG00000112297.14|ENSG00000112297.14|0|10374	1	95
ENSG00000112303.13|mRNA|VNN2|ENSG00000112303.13|ENSG00000112303.13|0|2633	1	93
ENSG00000112339.14|mRNA|HBS1L|ENSG00000112339.14|ENSG00000112339.14|0|11099	1	42
ENSG00000112799.8|mRNA|LY86|ENSG00000112799.8|ENSG00000112799.8|0|1254	1	83
ENSG00000112855.14|mRNA|HARS2|ENSG00000112855.14|ENSG00000112855.14|0|3408	1	45
ENSG00000113013.12|mRNA|HSPA9|ENSG00000113013.12|ENSG00000113013.12|0|4751	1	48
ENSG00000113356.11|mRNA|POLR3G|ENSG00000113356.11|ENSG00000113356.11|0|4019	1	83
ENSG00000113361.12|mRNA|CDH6|ENSG00000113361.12|ENSG00000113361.12|0|12379	1	37
ENSG00000113600.10|mRNA|C9|ENSG00000113600.10|ENSG00000113600.10|0|2951	1	20
ENSG00000113716.12|mRNA|HMGXB3|ENSG00000113716.12|ENSG00000113716.12|0|6263	1	65
ENSG00000116898.11|mRNA|MRPS15|ENSG00000116898.11|ENSG00000116898.11|0|2916	1	12
ENSG00000115109.13|mRNA|EPB41L5|ENSG00000115109.13|ENSG00000115109.13|0|9281	1	99
ENSG00000115204.14|mRNA|MPV17|ENSG00000115204.14|ENSG00000115204.14|0|5625	1	96
ENSG00000115290.9|mRNA|GRB14|ENSG00000115290.9|ENSG00000115290.9|0|2958	1	47
ENSG00000115484.14|mRNA|CCT4|ENSG00000115484.14|ENSG00000115484.14|0|2830	1	92
ENSG00000115607.9|mRNA|IL18RAP|ENSG00000115607.9|ENSG00000115607.9|0|2966	1	26
ENSG00000115677.16|mRNA|HDLBP|ENSG00000115677.16|ENSG00000115677.16|0|12182	1	56
ENSG00000115694.14|mRNA|STK25|ENSG00000115694.14|ENSG00000115694.14|0|7584	1	62
ENSG00000116095.10|mRNA|PLEKHA3|ENSG00000116095.10|ENSG00000116095.10|0|14193	1	87
ENSG00000116678.19|mRNA|LEPR|ENSG00000116678.19|ENSG00000116678.19|0|11370	1	43
ENSG00000116691.10|mRNA|MIIP|ENSG00000116691.10|ENSG00000116691.10|0|2821	1	98
ENSG00000116863.10|mRNA|ADPRHL2|ENSG00000116863.10|ENSG00000116863.10|0|1668	1	73
ENSG00000124226.10|mRNA|RNF114|ENSG00000124226.10|ENSG00000124226.10|0|4344	1	91
ENSG00000125347.13|mRNA|IRF1|ENSG00000125347.13|ENSG00000125347.13|0|7799	1	56
ENSG00000125485.17|mRNA|DDX31|ENSG00000125485.17|ENSG00000125485.17|0|5546	1	46
ENSG00000135390.17|mRNA|ATP5G2|ENSG00000135390.17|ENSG00000135390.17|0|3991	1	23
ENSG00000133983.14|mRNA|COX16|ENSG00000133983.14|ENSG00000133983.14|0|1863	1	99
ENSG00000134072.10|mRNA|CAMK1|ENSG00000134072.10|ENSG00000134072.10|0|2720	1	96
ENSG00000134153.9|mRNA|EMC7|ENSG00000134153.9|ENSG00000134153.9|0|1538	1	67
ENSG00000134285.10|mRNA|FKBP11|ENSG00000134285.10|ENSG00000134285.10|0|4957	1	18
ENSG00000134324.11|mRNA|LPIN1|ENSG00000134324.11|ENSG00000134324.11|0|11861	1	56
ENSG00000134668.12|mRNA|SPOCD1|ENSG00000134668.12|ENSG00000134668.12|0|7085	1	40
ENSG00000134815.18|mRNA|DHX34|ENSG00000134815.18|ENSG00000134815.18|0|5696	1	80
ENSG00000135048.13|mRNA|TMEM2|ENSG00000135048.13|ENSG00000135048.13|0|9625	1	99
ENSG00000135144.7|mRNA|DTX1|ENSG00000135144.7|ENSG00000135144.7|0|4387	1	73
ENSG00000135185.11|mRNA|TMEM243|ENSG00000135185.11|ENSG00000135185.11|0|3271	1	46
ENSG00000135249.7|mRNA|RINT1|ENSG00000135249.7|ENSG00000135249.7|0|3655	1	89
ENSG00000135446.16|mRNA|CDK4|ENSG00000135446.16|ENSG00000135446.16|0|3168	1	12
ENSG00000133794.17|mRNA|ARNTL|ENSG00000133794.17|ENSG00000133794.17|0|6726	1	73
ENSG00000135521.8|mRNA|LTV1|ENSG00000135521.8|ENSG00000135521.8|0|1847	1	91
ENSG00000135898.9|mRNA|GPR55|ENSG00000135898.9|ENSG00000135898.9|0|4130	1	72
ENSG00000136237.18|mRNA|RAPGEF5|ENSG00000136237.18|ENSG00000136237.18|0|10245	1	38
ENSG00000136250.11|mRNA|AOAH|ENSG00000136250.11|ENSG00000136250.11|0|3510	1	41
ENSG00000136271.10|mRNA|DDX56|ENSG00000136271.10|ENSG00000136271.10|0|4068	1	70
ENSG00000136305.11|mRNA|CIDEB|ENSG00000136305.11|ENSG00000136305.11|0|3198	1	6
ENSG00000136450.12|mRNA|SRSF1|ENSG00000136450.12|ENSG00000136450.12|0|3340	1	99
ENSG00000136490.8|mRNA|LIMD2|ENSG00000136490.8|ENSG00000136490.8|0|4745	1	65
ENSG00000136518.16|mRNA|ACTL6A|ENSG00000136518.16|ENSG00000136518.16|0|3675	1	66
ENSG00000136872.17|mRNA|ALDOB|ENSG00000136872.17|ENSG00000136872.17|0|2451	1	28
ENSG00000136937.12|mRNA|NCBP1|ENSG00000136937.12|ENSG00000136937.12|0|5548	1	98
ENSG00000133805.15|mRNA|AMPD3|ENSG00000133805.15|ENSG00000133805.15|0|6793	1	64
ENSG00000133657.14|mRNA|ATP13A3|ENSG00000133657.14|ENSG00000133657.14|0|11864	1	99
ENSG00000125630.15|mRNA|POLR1B|ENSG00000125630.15|ENSG00000125630.15|0|6329	1	78
ENSG00000130816.14|mRNA|DNMT1|ENSG00000130816.14|ENSG00000130816.14|0|9796	1	78
ENSG00000126067.11|mRNA|PSMB2|ENSG00000126067.11|ENSG00000126067.11|0|4843	1	54
ENSG00000126091.19|mRNA|ST3GAL3|ENSG00000126091.19|ENSG00000126091.19|0|4443	1	90
ENSG00000126107.14|mRNA|HECTD3|ENSG00000126107.14|ENSG00000126107.14|0|5077	1	71
ENSG00000126457.21|mRNA|PRMT1|ENSG00000126457.21|ENSG00000126457.21|0|4796	1	79
ENSG00000127951.6|mRNA|FGL2|ENSG00000127951.6|ENSG00000127951.6|0|4604	1	34
ENSG00000128849.10|mRNA|CGNL1|ENSG00000128849.10|ENSG00000128849.10|0|8663	1	33
ENSG00000130300.8|mRNA|PLVAP|ENSG00000130300.8|ENSG00000130300.8|0|2305	1	85
ENSG00000130511.15|mRNA|SSBP4|ENSG00000130511.15|ENSG00000130511.15|0|2974	1	73
ENSG00000130731.15|mRNA|METTL26|ENSG00000130731.15|ENSG00000130731.15|0|1830	1	64
ENSG00000130810.19|mRNA|PPAN|ENSG00000130810.19|ENSG00000130810.19|0|2583	1	72
ENSG00000130811.11|mRNA|EIF3G|ENSG00000130811.11|ENSG00000130811.11|0|3486	1	88
ENSG00000131115.15|mRNA|ZNF227|ENSG00000131115.15|ENSG00000131115.15|0|5069	1	64
ENSG00000133612.18|mRNA|AGAP3|ENSG00000133612.18|ENSG00000133612.18|0|11032	1	62
ENSG00000131143.8|mRNA|COX4I1|ENSG00000131143.8|ENSG00000131143.8|0|4792	1	80
ENSG00000131171.12|mRNA|SH3BGRL|ENSG00000131171.12|ENSG00000131171.12|0|2304	1	78
ENSG00000131323.14|mRNA|TRAF3|ENSG00000131323.14|ENSG00000131323.14|0|8263	1	50
ENSG00000131381.12|mRNA|RBSN|ENSG00000131381.12|ENSG00000131381.12|0|7921	1	79
ENSG00000131469.12|mRNA|RPL27|ENSG00000131469.12|ENSG00000131469.12|0|2026	1	75
ENSG00000131759.17|mRNA|RARA|ENSG00000131759.17|ENSG00000131759.17|0|4731	1	97
ENSG00000132275.10|mRNA|RRP8|ENSG00000132275.10|ENSG00000132275.10|0|6922	1	98
ENSG00000132294.14|mRNA|EFR3A|ENSG00000132294.14|ENSG00000132294.14|0|6197	1	99
ENSG00000132383.11|mRNA|RPA1|ENSG00000132383.11|ENSG00000132383.11|0|5492	1	93
ENSG00000132635.16|mRNA|PCED1A|ENSG00000132635.16|ENSG00000132635.16|0|2341	1	10
ENSG00000133246.11|mRNA|PRAM1|ENSG00000133246.11|ENSG00000133246.11|0|3763	1	35
ENSG00000111321.10|mRNA|LTBR|ENSG00000111321.10|ENSG00000111321.10|0|6280	1	29
ENSG00000111203.11|mRNA|ITFG2|ENSG00000111203.11|ENSG00000111203.11|0|6250	1	5
ENSG00000110987.8|mRNA|BCL7A|ENSG00000110987.8|ENSG00000110987.8|0|6565	1	9
ENSG00000077254.14|mRNA|USP33|ENSG00000077254.14|ENSG00000077254.14|0|6918	1	63
ENSG00000069702.10|mRNA|TGFBR3|ENSG00000069702.10|ENSG00000069702.10|0|8705	1	91
ENSG00000070190.12|mRNA|DAPP1|ENSG00000070190.12|ENSG00000070190.12|0|4548	1	76
ENSG00000070495.14|mRNA|JMJD6|ENSG00000070495.14|ENSG00000070495.14|0|5969	1	86
ENSG00000070785.16|mRNA|EIF2B3|ENSG00000070785.16|ENSG00000070785.16|0|3411	1	75
ENSG00000071051.13|mRNA|NCK2|ENSG00000071051.13|ENSG00000071051.13|0|2990	1	27
ENSG00000071205.11|mRNA|ARHGAP10|ENSG00000071205.11|ENSG00000071205.11|0|10759	1	76
ENSG00000072506.12|mRNA|HSD17B10|ENSG00000072506.12|ENSG00000072506.12|0|1115	1	7
ENSG00000074657.13|mRNA|ZNF532|ENSG00000074657.13|ENSG00000074657.13|0|11951	1	54
ENSG00000075651.15|mRNA|PLD1|ENSG00000075651.15|ENSG00000075651.15|0|12859	1	75
ENSG00000076067.12|mRNA|RBMS2|ENSG00000076067.12|ENSG00000076067.12|0|8808	1	74
ENSG00000077238.13|mRNA|IL4R|ENSG00000077238.13|ENSG00000077238.13|0|5894	1	91
ENSG00000078304.19|mRNA|PPP2R5C|ENSG00000078304.19|ENSG00000078304.19|0|14289	1	73
ENSG00000067113.16|mRNA|PLPP1|ENSG00000067113.16|ENSG00000067113.16|0|2016	1	92
ENSG00000080839.11|mRNA|RBL1|ENSG00000080839.11|ENSG00000080839.11|0|5954	1	52
ENSG00000081059.19|mRNA|TCF7|ENSG00000081059.19|ENSG00000081059.19|0|10063	1	52
ENSG00000081189.15|mRNA|MEF2C|ENSG00000081189.15|ENSG00000081189.15|0|11755	1	29
ENSG00000082512.14|mRNA|TRAF5|ENSG00000082512.14|ENSG00000082512.14|0|9022	1	87
ENSG00000085276.17|mRNA|MECOM|ENSG00000085276.17|ENSG00000085276.17|0|9103	1	88
ENSG00000085377.13|mRNA|PREP|ENSG00000085377.13|ENSG00000085377.13|0|3762	1	17
ENSG00000085415.15|mRNA|SEH1L|ENSG00000085415.15|ENSG00000085415.15|0|10481	1	86
ENSG00000087095.12|mRNA|NLK|ENSG00000087095.12|ENSG00000087095.12|0|5290	1	18
ENSG00000089060.11|mRNA|SLC8B1|ENSG00000089060.11|ENSG00000089060.11|0|6768	1	44
ENSG00000089248.6|mRNA|ERP29|ENSG00000089248.6|ENSG00000089248.6|0|3083	1	56
ENSG00000090013.9|mRNA|BLVRB|ENSG00000090013.9|ENSG00000090013.9|0|1665	1	64
ENSG00000069493.14|mRNA|CLEC2D|ENSG00000069493.14|ENSG00000069493.14|0|6957	1	98
ENSG00000065457.10|mRNA|ADAT1|ENSG00000065457.10|ENSG00000065457.10|0|4486	1	59
ENSG00000094914.12|mRNA|AAAS|ENSG00000094914.12|ENSG00000094914.12|0|4138	1	88
ENSG00000030110.12|mRNA|BAK1|ENSG00000030110.12|ENSG00000030110.12|0|2212	1	79
ENSG00000004399.12|mRNA|PLXND1|ENSG00000004399.12|ENSG00000004399.12|0|9738	1	65
ENSG00000004478.7|mRNA|FKBP4|ENSG00000004478.7|ENSG00000004478.7|0|5180	1	53
ENSG00000004961.14|mRNA|HCCS|ENSG00000004961.14|ENSG00000004961.14|0|2335	1	44
ENSG00000005020.12|mRNA|SKAP2|ENSG00000005020.12|ENSG00000005020.12|0|5520	1	34
ENSG00000005471.15|mRNA|ABCB4|ENSG00000005471.15|ENSG00000005471.15|0|7494	1	58
ENSG00000006534.15|mRNA|ALDH3B1|ENSG00000006534.15|ENSG00000006534.15|0|6626	1	75
ENSG00000007312.12|mRNA|CD79B|ENSG00000007312.12|ENSG00000007312.12|0|2080	1	50
ENSG00000008083.13|mRNA|JARID2|ENSG00000008083.13|ENSG00000008083.13|0|6015	1	53
ENSG00000008838.19|mRNA|MED24|ENSG00000008838.19|ENSG00000008838.19|0|6962	1	37
ENSG00000014641.17|mRNA|MDH1|ENSG00000014641.17|ENSG00000014641.17|0|4990	1	90
ENSG00000015285.10|mRNA|WAS|ENSG00000015285.10|ENSG00000015285.10|0|2381	1	69
ENSG00000034713.7|mRNA|GABARAPL2|ENSG00000034713.7|ENSG00000034713.7|0|3034	1	16
ENSG00000065413.18|mRNA|ANKRD44|ENSG00000065413.18|ENSG00000065413.18|0|10839	1	98
ENSG00000038358.14|mRNA|EDC4|ENSG00000038358.14|ENSG00000038358.14|0|6173	1	70
ENSG00000041802.10|mRNA|LSG1|ENSG00000041802.10|ENSG00000041802.10|0|4818	1	79
ENSG00000042493.15|mRNA|CAPG|ENSG00000042493.15|ENSG00000042493.15|0|2607	1	67
ENSG00000047578.12|mRNA|KIAA0556|ENSG00000047578.12|ENSG00000047578.12|0|9784	1	80
ENSG00000050393.11|mRNA|MCUR1|ENSG00000050393.11|ENSG00000050393.11|0|6057	1	15
ENSG00000054356.13|mRNA|PTPRN|ENSG00000054356.13|ENSG00000054356.13|0|8261	1	10
ENSG00000055950.16|mRNA|MRPL43|ENSG00000055950.16|ENSG00000055950.16|0|3573	1	89
ENSG00000061676.14|mRNA|NCKAP1|ENSG00000061676.14|ENSG00000061676.14|0|22520	1	68
ENSG00000063438.16|mRNA|AHRR|ENSG00000063438.16|ENSG00000063438.16|0|7678	1	65
ENSG00000064042.17|mRNA|LIMCH1|ENSG00000064042.17|ENSG00000064042.17|0|10862	1	57
ENSG00000064666.14|mRNA|CNN2|ENSG00000064666.14|ENSG00000064666.14|0|3645	1	35
ENSG00000090447.11|mRNA|TFAP4|ENSG00000090447.11|ENSG00000090447.11|0|7867	1	23
ENSG00000095370.19|mRNA|SH2D3C|ENSG00000095370.19|ENSG00000095370.19|0|4659	1	64
ENSG00000110697.12|mRNA|PITPNM1|ENSG00000110697.12|ENSG00000110697.12|0|6449	1	32
ENSG00000107317.12|mRNA|PTGDS|ENSG00000107317.12|ENSG00000107317.12|0|2711	1	39
ENSG00000104884.14|mRNA|ERCC2|ENSG00000104884.14|ENSG00000104884.14|0|6450	1	55
ENSG00000104915.14|mRNA|STX10|ENSG00000104915.14|ENSG00000104915.14|0|1796	1	38
ENSG00000105401.8|mRNA|CDC37|ENSG00000105401.8|ENSG00000105401.8|0|3041	1	89
ENSG00000105700.10|mRNA|KXD1|ENSG00000105700.10|ENSG00000105700.10|0|4112	1	55
ENSG00000105875.13|mRNA|WDR91|ENSG00000105875.13|ENSG00000105875.13|0|6032	1	35
ENSG00000105887.10|mRNA|MTPN|ENSG00000105887.10|ENSG00000105887.10|0|3775	1	32
ENSG00000105953.14|mRNA|OGDH|ENSG00000105953.14|ENSG00000105953.14|0|5210	1	74
ENSG00000106028.10|mRNA|SSBP1|ENSG00000106028.10|ENSG00000106028.10|0|4988	1	85
ENSG00000106049.8|mRNA|HIBADH|ENSG00000106049.8|ENSG00000106049.8|0|2323	1	71
ENSG00000106263.17|mRNA|EIF3B|ENSG00000106263.17|ENSG00000106263.17|0|8998	1	89
ENSG00000107186.16|mRNA|MPDZ|ENSG00000107186.16|ENSG00000107186.16|0|11273	1	92
ENSG00000107736.19|mRNA|CDH23|ENSG00000107736.19|ENSG00000107736.19|0|18059	1	98
ENSG00000104731.13|mRNA|KLHDC4|ENSG00000104731.13|ENSG00000104731.13|0|11177	1	36
ENSG00000107854.5|mRNA|TNKS2|ENSG00000107854.5|ENSG00000107854.5|0|6157	1	96
ENSG00000107897.18|mRNA|ACBD5|ENSG00000107897.18|ENSG00000107897.18|0|4371	1	3
ENSG00000107938.17|mRNA|EDRF1|ENSG00000107938.17|ENSG00000107938.17|0|7741	1	89
ENSG00000108244.16|mRNA|KRT23|ENSG00000108244.16|ENSG00000108244.16|0|2902	1	48
ENSG00000108465.14|mRNA|CDK5RAP3|ENSG00000108465.14|ENSG00000108465.14|0|6070	1	32
ENSG00000108798.8|mRNA|ABI3|ENSG00000108798.8|ENSG00000108798.8|0|2456	1	27
ENSG00000108961.13|mRNA|RANGRF|ENSG00000108961.13|ENSG00000108961.13|0|1577	1	82
ENSG00000109339.20|mRNA|MAPK10|ENSG00000109339.20|ENSG00000109339.20|0|42646	1	98
ENSG00000109919.9|mRNA|MTCH2|ENSG00000109919.9|ENSG00000109919.9|0|2897	1	47
ENSG00000110090.12|mRNA|CPT1A|ENSG00000110090.12|ENSG00000110090.12|0|6565	1	28
ENSG00000110497.14|mRNA|AMBRA1|ENSG00000110497.14|ENSG00000110497.14|0|7673	1	90
ENSG00000104774.12|mRNA|MAN2B1|ENSG00000104774.12|ENSG00000104774.12|0|5374	1	73
ENSG00000104529.17|mRNA|EEF1D|ENSG00000104529.17|ENSG00000104529.17|0|9390	1	83
ENSG00000096384.19|mRNA|HSP90AB1|ENSG00000096384.19|ENSG00000096384.19|0|2980	1	74
ENSG00000100376.11|mRNA|FAM118A|ENSG00000100376.11|ENSG00000100376.11|0|6512	1	36
ENSG00000096872.15|mRNA|IFT74|ENSG00000096872.15|ENSG00000096872.15|0|3755	1	69
ENSG00000099341.11|mRNA|PSMD8|ENSG00000099341.11|ENSG00000099341.11|0|3105	1	17
ENSG00000099800.7|mRNA|TIMM13|ENSG00000099800.7|ENSG00000099800.7|0|1973	1	12
ENSG00000099875.14|mRNA|MKNK2|ENSG00000099875.14|ENSG00000099875.14|0|5221	1	71
ENSG00000099917.17|mRNA|MED15|ENSG00000099917.17|ENSG00000099917.17|0|10374	1	68
ENSG00000099992.15|mRNA|TBC1D10A|ENSG00000099992.15|ENSG00000099992.15|0|7047	1	29
ENSG00000100079.6|mRNA|LGALS2|ENSG00000100079.6|ENSG00000100079.6|0|828	1	39
ENSG00000100104.13|mRNA|SRRD|ENSG00000100104.13|ENSG00000100104.13|0|4319	1	77
ENSG00000100271.16|mRNA|TTLL1|ENSG00000100271.16|ENSG00000100271.16|0|1749	1	84
ENSG00000100319.12|mRNA|ZMAT5|ENSG00000100319.12|ENSG00000100319.12|0|3200	1	56
ENSG00000100348.9|mRNA|TXN2|ENSG00000100348.9|ENSG00000100348.9|0|2050	1	52
ENSG00000100462.15|mRNA|PRMT5|ENSG00000100462.15|ENSG00000100462.15|0|3467	1	64
ENSG00000104472.9|mRNA|CHRAC1|ENSG00000104472.9|ENSG00000104472.9|0|3301	1	94
ENSG00000100897.17|mRNA|DCAF11|ENSG00000100897.17|ENSG00000100897.17|0|6350	1	33
ENSG00000100949.14|mRNA|RABGGTA|ENSG00000100949.14|ENSG00000100949.14|0|3545	1	62
ENSG00000101335.9|mRNA|MYL9|ENSG00000101335.9|ENSG00000101335.9|0|2821	1	26
ENSG00000101470.9|mRNA|TNNC2|ENSG00000101470.9|ENSG00000101470.9|0|876	1	57
ENSG00000101843.18|mRNA|PSMD10|ENSG00000101843.18|ENSG00000101843.18|0|2459	1	25
ENSG00000102034.16|mRNA|ELF4|ENSG00000102034.16|ENSG00000102034.16|0|4316	1	90
ENSG00000102595.19|mRNA|UGGT2|ENSG00000102595.19|ENSG00000102595.19|0|8105	1	69
ENSG00000103018.16|mRNA|CYB5B|ENSG00000103018.16|ENSG00000103018.16|0|6903	1	9
ENSG00000103365.15|mRNA|GGA2|ENSG00000103365.15|ENSG00000103365.15|0|8231	1	75
ENSG00000103769.9|mRNA|RAB11A|ENSG00000103769.9|ENSG00000103769.9|0|5682	1	14
ENSG00000104442.9|mRNA|ARMC1|ENSG00000104442.9|ENSG00000104442.9|0|3421	1	58
ENSG00000137054.15|mRNA|POLR1E|ENSG00000137054.15|ENSG00000137054.15|0|2512	1	64
ENSG00000137073.21|mRNA|UBAP2|ENSG00000137073.21|ENSG00000137073.21|0|10620	1	73
ENSG00000137171.14|mRNA|KLC4|ENSG00000137171.14|ENSG00000137171.14|0|6421	1	80
ENSG00000171606.17|mRNA|ZNF274|ENSG00000171606.17|ENSG00000171606.17|0|8333	1	73
ENSG00000169599.12|mRNA|NFU1|ENSG00000169599.12|ENSG00000169599.12|0|2197	1	56
ENSG00000169627.7|mRNA|BOLA2B|ENSG00000169627.7|ENSG00000169627.7|0|1365	1	71
ENSG00000169760.17|mRNA|NLGN1|ENSG00000169760.17|ENSG00000169760.17|0|10148	1	55
ENSG00000169946.13|mRNA|ZFPM2|ENSG00000169946.13|ENSG00000169946.13|0|7775	1	63
ENSG00000170085.17|mRNA|SIMC1|ENSG00000170085.17|ENSG00000170085.17|0|5536	1	85
ENSG00000170248.13|mRNA|PDCD6IP|ENSG00000170248.13|ENSG00000170248.13|0|9038	1	62
ENSG00000170322.14|mRNA|NFRKB|ENSG00000170322.14|ENSG00000170322.14|0|6335	1	54
ENSG00000170584.10|mRNA|NUDCD2|ENSG00000170584.10|ENSG00000170584.10|0|8847	1	69
ENSG00000170935.7|mRNA|NCBP2L|ENSG00000170935.7|ENSG00000170935.7|0|2079	1	83
ENSG00000171202.6|mRNA|TMEM126A|ENSG00000171202.6|ENSG00000171202.6|0|971	1	64
ENSG00000171492.14|mRNA|LRRC8D|ENSG00000171492.14|ENSG00000171492.14|0|4852	1	35
ENSG00000171735.18|mRNA|CAMTA1|ENSG00000171735.18|ENSG00000171735.18|0|10033	1	99
ENSG00000169429.10|mRNA|CXCL8|ENSG00000169429.10|ENSG00000169429.10|0|2274	1	62
ENSG00000171777.15|mRNA|RASGRP4|ENSG00000171777.15|ENSG00000171777.15|0|4183	1	33
ENSG00000171824.13|mRNA|EXOSC10|ENSG00000171824.13|ENSG00000171824.13|0|6003	1	52
ENSG00000171928.13|mRNA|TVP23B|ENSG00000171928.13|ENSG00000171928.13|0|5862	1	10
ENSG00000172575.11|mRNA|RASGRP1|ENSG00000172575.11|ENSG00000172575.11|0|6097	1	91
ENSG00000172831.11|mRNA|CES2|ENSG00000172831.11|ENSG00000172831.11|0|5343	1	16
ENSG00000172922.8|mRNA|RNASEH2C|ENSG00000172922.8|ENSG00000172922.8|0|3697	1	73
ENSG00000173848.18|mRNA|NET1|ENSG00000173848.18|ENSG00000173848.18|0|4175	1	84
ENSG00000173852.14|mRNA|DPY19L1|ENSG00000173852.14|ENSG00000173852.14|0|6278	1	84
ENSG00000175130.6|mRNA|MARCKSL1|ENSG00000175130.6|ENSG00000175130.6|0|1699	1	67
ENSG00000175193.13|mRNA|PARL|ENSG00000175193.13|ENSG00000175193.13|0|2268	1	59
ENSG00000175324.9|mRNA|LSM1|ENSG00000175324.9|ENSG00000175324.9|0|1690	1	56
ENSG00000169442.8|mRNA|CD52|ENSG00000169442.8|ENSG00000169442.8|0|935	1	10
ENSG00000169019.10|mRNA|COMMD8|ENSG00000169019.10|ENSG00000169019.10|0|1766	1	47
ENSG00000176046.8|mRNA|NUPR1|ENSG00000176046.8|ENSG00000176046.8|0|5674	1	20
ENSG00000166347.18|mRNA|CYB5A|ENSG00000166347.18|ENSG00000166347.18|0|9313	1	89
ENSG00000165322.17|mRNA|ARHGAP12|ENSG00000165322.17|ENSG00000165322.17|0|5938	1	23
ENSG00000165609.12|mRNA|NUDT5|ENSG00000165609.12|ENSG00000165609.12|0|4969	1	59
ENSG00000165675.16|mRNA|ENOX2|ENSG00000165675.16|ENSG00000165675.16|0|4279	1	84
ENSG00000165688.11|mRNA|PMPCA|ENSG00000165688.11|ENSG00000165688.11|0|6590	1	7
ENSG00000165792.17|mRNA|METTL17|ENSG00000165792.17|ENSG00000165792.17|0|4449	1	33
ENSG00000165819.11|mRNA|METTL3|ENSG00000165819.11|ENSG00000165819.11|0|5894	1	55
ENSG00000165886.4|mRNA|UBTD1|ENSG00000165886.4|ENSG00000165886.4|0|1706	1	73
ENSG00000165899.10|mRNA|OTOGL|ENSG00000165899.10|ENSG00000165899.10|0|8380	1	32
ENSG00000165959.11|mRNA|CLMN|ENSG00000165959.11|ENSG00000165959.11|0|15701	1	52
ENSG00000166147.13|mRNA|FBN1|ENSG00000166147.13|ENSG00000166147.13|0|16057	1	72
ENSG00000166260.11|mRNA|COX11|ENSG00000166260.11|ENSG00000166260.11|0|6488	1	90
ENSG00000166398.12|mRNA|KIAA0355|ENSG00000166398.12|ENSG00000166398.12|0|7459	1	63
ENSG00000168461.12|mRNA|RAB31|ENSG00000168461.12|ENSG00000168461.12|0|5586	1	45
ENSG00000166523.7|mRNA|CLEC4E|ENSG00000166523.7|ENSG00000166523.7|0|2422	1	34
ENSG00000166947.11|mRNA|EPB42|ENSG00000166947.11|ENSG00000166947.11|0|5574	1	67
ENSG00000167131.16|mRNA|CCDC103|ENSG00000167131.16|ENSG00000167131.16|0|3895	1	71
ENSG00000167272.10|mRNA|POP5|ENSG00000167272.10|ENSG00000167272.10|0|2173	1	4
ENSG00000167315.17|mRNA|ACAA2|ENSG00000167315.17|ENSG00000167315.17|0|5072	1	72
ENSG00000167641.10|mRNA|PPP1R14A|ENSG00000167641.10|ENSG00000167641.10|0|1501	1	91
ENSG00000167965.17|mRNA|MLST8|ENSG00000167965.17|ENSG00000167965.17|0|4323	1	99
ENSG00000167967.15|mRNA|E4F1|ENSG00000167967.15|ENSG00000167967.15|0|6402	1	75
ENSG00000168010.10|mRNA|ATG16L2|ENSG00000168010.10|ENSG00000168010.10|0|8617	1	41
ENSG00000168056.15|mRNA|LTBP3|ENSG00000168056.15|ENSG00000168056.15|0|10298	1	24
ENSG00000168411.13|mRNA|RFWD3|ENSG00000168411.13|ENSG00000168411.13|0|6465	1	69
ENSG00000175895.3|mRNA|PLEKHF2|ENSG00000175895.3|ENSG00000175895.3|0|3137	1	94
ENSG00000176444.18|mRNA|CLK2|ENSG00000176444.18|ENSG00000176444.18|0|3670	1	76
ENSG00000164970.14|mRNA|FAM219A|ENSG00000164970.14|ENSG00000164970.14|0|3782	1	92
ENSG00000197756.9|mRNA|RPL37A|ENSG00000197756.9|ENSG00000197756.9|0|6841	1	71
ENSG00000196290.14|mRNA|NIF3L1|ENSG00000196290.14|ENSG00000196290.14|0|1985	1	60
ENSG00000196305.17|mRNA|IARS|ENSG00000196305.17|ENSG00000196305.17|0|7401	1	84
ENSG00000196313.11|mRNA|POM121|ENSG00000196313.11|ENSG00000196313.11|0|9822	1	53
ENSG00000196353.11|mRNA|CPNE4|ENSG00000196353.11|ENSG00000196353.11|0|6427	1	86
ENSG00000196502.11|mRNA|SULT1A1|ENSG00000196502.11|ENSG00000196502.11|0|8909	1	77
ENSG00000196531.10|mRNA|NACA|ENSG00000196531.10|ENSG00000196531.10|0|10008	1	88
ENSG00000196611.4|mRNA|MMP1|ENSG00000196611.4|ENSG00000196611.4|0|1970	1	25
ENSG00000196670.13|mRNA|ZFP62|ENSG00000196670.13|ENSG00000196670.13|0|4197	1	97
ENSG00000196826.7|mRNA|AC008758.1|ENSG00000196826.7|ENSG00000196826.7|0|4505	1	70
ENSG00000196839.12|mRNA|ADA|ENSG00000196839.12|ENSG00000196839.12|0|2852	1	57
ENSG00000197345.12|mRNA|MRPL21|ENSG00000197345.12|ENSG00000197345.12|0|2825	1	77
ENSG00000197872.11|mRNA|FAM49A|ENSG00000197872.11|ENSG00000197872.11|0|5448	1	92
ENSG00000189171.14|mRNA|S100A13|ENSG00000189171.14|ENSG00000189171.14|0|2216	1	83
ENSG00000197894.10|mRNA|ADH5|ENSG00000197894.10|ENSG00000197894.10|0|4866	1	20
ENSG00000197905.8|mRNA|TEAD4|ENSG00000197905.8|ENSG00000197905.8|0|2272	1	97
ENSG00000197956.9|mRNA|S100A6|ENSG00000197956.9|ENSG00000197956.9|0|971	1	64
ENSG00000197969.11|mRNA|VPS13A|ENSG00000197969.11|ENSG00000197969.11|0|20196	1	66
ENSG00000198093.10|mRNA|ZNF649|ENSG00000198093.10|ENSG00000198093.10|0|4365	1	84
ENSG00000198286.9|mRNA|CARD11|ENSG00000198286.9|ENSG00000198286.9|0|4707	1	50
ENSG00000198363.17|mRNA|ASPH|ENSG00000198363.17|ENSG00000198363.17|0|20047	1	55
ENSG00000198736.11|mRNA|MSRB1|ENSG00000198736.11|ENSG00000198736.11|0|2157	1	98
ENSG00000198780.11|mRNA|FAM169A|ENSG00000198780.11|ENSG00000198780.11|0|6860	1	58
ENSG00000198839.9|mRNA|ZNF277|ENSG00000198839.9|ENSG00000198839.9|0|4014	1	29
ENSG00000198898.13|mRNA|CAPZA2|ENSG00000198898.13|ENSG00000198898.13|0|8425	1	35
ENSG00000189319.13|mRNA|FAM53B|ENSG00000189319.13|ENSG00000189319.13|0|6424	1	96
ENSG00000188243.12|mRNA|COMMD6|ENSG00000188243.12|ENSG00000188243.12|0|2897	1	95
ENSG00000176731.11|mRNA|C8orf59|ENSG00000176731.11|ENSG00000176731.11|0|2514	1	80
ENSG00000183323.12|mRNA|CCDC125|ENSG00000183323.12|ENSG00000183323.12|0|7932	1	59
ENSG00000177425.10|mRNA|PAWR|ENSG00000177425.10|ENSG00000177425.10|0|11668	1	10
ENSG00000178199.13|mRNA|ZC3H12D|ENSG00000178199.13|ENSG00000178199.13|0|6733	1	68
ENSG00000178252.17|mRNA|WDR6|ENSG00000178252.17|ENSG00000178252.17|0|5304	1	33
ENSG00000179088.14|mRNA|C12orf42|ENSG00000179088.14|ENSG00000179088.14|0|4898	1	59
ENSG00000180644.7|mRNA|PRF1|ENSG00000180644.7|ENSG00000180644.7|0|2534	1	68
ENSG00000181904.8|mRNA|C5orf24|ENSG00000181904.8|ENSG00000181904.8|0|5741	1	77
ENSG00000182022.17|mRNA|CHST15|ENSG00000182022.17|ENSG00000182022.17|0|6554	1	11
ENSG00000182512.4|mRNA|GLRX5|ENSG00000182512.4|ENSG00000182512.4|0|2845	1	51
ENSG00000182899.14|mRNA|RPL35A|ENSG00000182899.14|ENSG00000182899.14|0|2977	1	99
ENSG00000182986.12|mRNA|ZNF320|ENSG00000182986.12|ENSG00000182986.12|0|8363	1	25
ENSG00000183020.13|mRNA|AP2A2|ENSG00000183020.13|ENSG00000183020.13|0|9638	1	84
ENSG00000183617.4|mRNA|MRPL54|ENSG00000183617.4|ENSG00000183617.4|0|1003	1	59
ENSG00000187994.13|mRNA|RINL|ENSG00000187994.13|ENSG00000187994.13|0|4201	1	92
ENSG00000183688.4|mRNA|RFLNB|ENSG00000183688.4|ENSG00000183688.4|0|3621	1	86
ENSG00000183813.6|mRNA|CCR4|ENSG00000183813.6|ENSG00000183813.6|0|3095	1	51
ENSG00000184178.15|mRNA|SCFD2|ENSG00000184178.15|ENSG00000184178.15|0|3185	1	24
ENSG00000184990.12|mRNA|SIVA1|ENSG00000184990.12|ENSG00000184990.12|0|4776	1	15
ENSG00000185245.7|mRNA|GP1BA|ENSG00000185245.7|ENSG00000185245.7|0|2501	1	72
ENSG00000185507.19|mRNA|IRF7|ENSG00000185507.19|ENSG00000185507.19|0|2628	1	62
ENSG00000185842.15|mRNA|DNAH14|ENSG00000185842.15|ENSG00000185842.15|0|19693	1	69
ENSG00000185963.13|mRNA|BICD2|ENSG00000185963.13|ENSG00000185963.13|0|6427	1	58
ENSG00000186432.8|mRNA|KPNA4|ENSG00000186432.8|ENSG00000186432.8|0|9413	1	60
ENSG00000187240.13|mRNA|DYNC2H1|ENSG00000187240.13|ENSG00000187240.13|0|14284	1	54
ENSG00000187630.15|mRNA|DHRS4L2|ENSG00000187630.15|ENSG00000187630.15|0|2516	1	89
ENSG00000165168.7|mRNA|CYBB|ENSG00000165168.7|ENSG00000165168.7|0|4423	1	61
ENSG00000164896.19|mRNA|FASTK|ENSG00000164896.19|ENSG00000164896.19|0|3805	1	74
ENSG00000137198.9|mRNA|GMPR|ENSG00000137198.9|ENSG00000137198.9|0|2232	1	89
ENSG00000144560.14|mRNA|VGLL4|ENSG00000144560.14|ENSG00000144560.14|0|7236	1	48
ENSG00000142765.17|mRNA|SYTL1|ENSG00000142765.17|ENSG00000142765.17|0|5584	1	88
ENSG00000143013.12|mRNA|LMO4|ENSG00000143013.12|ENSG00000143013.12|0|5833	1	67
ENSG00000143119.12|mRNA|CD53|ENSG00000143119.12|ENSG00000143119.12|0|2080	1	72
ENSG00000143222.11|mRNA|UFC1|ENSG00000143222.11|ENSG00000143222.11|0|2274	1	99
ENSG00000143252.14|mRNA|SDHC|ENSG00000143252.14|ENSG00000143252.14|0|14160	1	22
ENSG00000143319.16|mRNA|ISG20L2|ENSG00000143319.16|ENSG00000143319.16|0|5262	1	73
ENSG00000143373.17|mRNA|ZNF687|ENSG00000143373.17|ENSG00000143373.17|0|6349	1	61
ENSG00000143575.14|mRNA|HAX1|ENSG00000143575.14|ENSG00000143575.14|0|2155	1	91
ENSG00000143621.16|mRNA|ILF2|ENSG00000143621.16|ENSG00000143621.16|0|2281	1	84
ENSG00000143851.15|mRNA|PTPN7|ENSG00000143851.15|ENSG00000143851.15|0|5906	1	97
ENSG00000143995.19|mRNA|MEIS1|ENSG00000143995.19|ENSG00000143995.19|0|10934	1	31
ENSG00000144659.10|mRNA|SLC25A38|ENSG00000144659.10|ENSG00000144659.10|0|2151	1	43
ENSG00000141698.16|mRNA|NT5C3B|ENSG00000141698.16|ENSG00000141698.16|0|2730	1	83
ENSG00000145649.7|mRNA|GZMA|ENSG00000145649.7|ENSG00000145649.7|0|894	1	93
ENSG00000145781.8|mRNA|COMMD10|ENSG00000145781.8|ENSG00000145781.8|0|2464	1	21
ENSG00000146066.2|mRNA|HIGD2A|ENSG00000146066.2|ENSG00000146066.2|0|668	1	73
ENSG00000146731.10|mRNA|CCT6A|ENSG00000146731.10|ENSG00000146731.10|0|3901	1	81
ENSG00000146963.17|mRNA|LUC7L2|ENSG00000146963.17|ENSG00000146963.17|0|6316	1	67
ENSG00000147123.10|mRNA|NDUFB11|ENSG00000147123.10|ENSG00000147123.10|0|1418	1	57
ENSG00000147400.8|mRNA|CETN2|ENSG00000147400.8|ENSG00000147400.8|0|1928	1	73
ENSG00000147604.13|mRNA|RPL7|ENSG00000147604.13|ENSG00000147604.13|0|2907	1	44
ENSG00000148019.12|mRNA|CEP78|ENSG00000148019.12|ENSG00000148019.12|0|14355	1	28
ENSG00000148120.16|mRNA|C9orf3|ENSG00000148120.16|ENSG00000148120.16|0|10742	1	64
ENSG00000148346.11|mRNA|LCN2|ENSG00000148346.11|ENSG00000148346.11|0|1598	1	12
ENSG00000142166.12|mRNA|IFNAR1|ENSG00000142166.12|ENSG00000142166.12|0|6301	1	41
ENSG00000141524.15|mRNA|TMC6|ENSG00000141524.15|ENSG00000141524.15|0|8669	1	94
ENSG00000148655.14|mRNA|LRMDA|ENSG00000148655.14|ENSG00000148655.14|0|6560	1	79
ENSG00000138439.11|mRNA|FAM117B|ENSG00000138439.11|ENSG00000138439.11|0|5986	1	80
ENSG00000137309.19|mRNA|HMGA1|ENSG00000137309.19|ENSG00000137309.19|0|2327	1	67
ENSG00000137413.15|mRNA|TAF8|ENSG00000137413.15|ENSG00000137413.15|0|9286	1	50
ENSG00000137601.16|mRNA|NEK1|ENSG00000137601.16|ENSG00000137601.16|0|8308	1	80
ENSG00000137714.2|mRNA|FDX1|ENSG00000137714.2|ENSG00000137714.2|0|3206	1	70
ENSG00000137767.13|mRNA|SQOR|ENSG00000137767.13|ENSG00000137767.13|0|3088	1	12
ENSG00000137812.19|mRNA|KNL1|ENSG00000137812.19|ENSG00000137812.19|0|10250	1	70
ENSG00000137824.15|mRNA|RMDN3|ENSG00000137824.15|ENSG00000137824.15|0|5114	1	91
ENSG00000137845.14|mRNA|ADAM10|ENSG00000137845.14|ENSG00000137845.14|0|16168	1	26
ENSG00000137876.9|mRNA|RSL24D1|ENSG00000137876.9|ENSG00000137876.9|0|3009	1	12
ENSG00000137942.16|mRNA|FNBP1L|ENSG00000137942.16|ENSG00000137942.16|0|5798	1	25
ENSG00000138166.5|mRNA|DUSP5|ENSG00000138166.5|ENSG00000138166.5|0|2615	1	2
ENSG00000138757.14|mRNA|G3BP2|ENSG00000138757.14|ENSG00000138757.14|0|7183	1	15
ENSG00000141337.12|mRNA|ARSG|ENSG00000141337.12|ENSG00000141337.12|0|6587	1	39
ENSG00000138758.11|mRNA|SEPT11|ENSG00000138758.11|ENSG00000138758.11|0|9787	1	53
ENSG00000138760.9|mRNA|SCARB2|ENSG00000138760.9|ENSG00000138760.9|0|19341	1	99
ENSG00000138785.14|mRNA|INTS12|ENSG00000138785.14|ENSG00000138785.14|0|3897	1	85
ENSG00000138814.16|mRNA|PPP3CA|ENSG00000138814.16|ENSG00000138814.16|0|5213	1	98
ENSG00000139178.10|mRNA|C1RL|ENSG00000139178.10|ENSG00000139178.10|0|5014	1	17
ENSG00000139505.11|mRNA|MTMR6|ENSG00000139505.11|ENSG00000139505.11|0|5779	1	88
ENSG00000140365.15|mRNA|COMMD4|ENSG00000140365.15|ENSG00000140365.15|0|6779	1	74
ENSG00000140374.15|mRNA|ETFA|ENSG00000140374.15|ENSG00000140374.15|0|5031	1	79
ENSG00000140941.12|mRNA|MAP1LC3B|ENSG00000140941.12|ENSG00000140941.12|0|5313	1	24
ENSG00000140987.19|mRNA|ZSCAN32|ENSG00000140987.19|ENSG00000140987.19|0|4013	1	97
ENSG00000141293.15|mRNA|SKAP1|ENSG00000141293.15|ENSG00000141293.15|0|2648	1	88
ENSG00000148541.12|mRNA|FAM13C|ENSG00000148541.12|ENSG00000148541.12|0|6753	1	44
ENSG00000148688.13|mRNA|RPP30|ENSG00000148688.13|ENSG00000148688.13|0|4653	1	90
ENSG00000164442.9|mRNA|CITED2|ENSG00000164442.9|ENSG00000164442.9|0|2535	1	96
ENSG00000163565.18|mRNA|IFI16|ENSG00000163565.18|ENSG00000163565.18|0|5294	1	15
ENSG00000160124.9|mRNA|CCDC58|ENSG00000160124.9|ENSG00000160124.9|0|1746	1	90
ENSG00000160188.9|mRNA|RSPH1|ENSG00000160188.9|ENSG00000160188.9|0|2988	1	83
ENSG00000160221.16|mRNA|C21orf33|ENSG00000160221.16|ENSG00000160221.16|0|3108	1	15
ENSG00000160593.18|mRNA|JAML|ENSG00000160593.18|ENSG00000160593.18|0|8587	1	79
ENSG00000161847.13|mRNA|RAVER1|ENSG00000161847.13|ENSG00000161847.13|0|4981	1	15
ENSG00000161956.12|mRNA|SENP3|ENSG00000161956.12|ENSG00000161956.12|0|3668	1	39
ENSG00000162367.11|mRNA|TAL1|ENSG00000162367.11|ENSG00000162367.11|0|5700	1	52
ENSG00000162368.13|mRNA|CMPK1|ENSG00000162368.13|ENSG00000162368.13|0|3844	1	73
ENSG00000162419.12|mRNA|GMEB1|ENSG00000162419.12|ENSG00000162419.12|0|6459	1	68
ENSG00000162645.12|mRNA|GBP2|ENSG00000162645.12|ENSG00000162645.12|0|6276	1	36
ENSG00000162999.12|mRNA|DUSP19|ENSG00000162999.12|ENSG00000162999.12|0|5376	1	71
ENSG00000163568.14|mRNA|AIM2|ENSG00000163568.14|ENSG00000163568.14|0|2009	1	96
ENSG00000158691.14|mRNA|ZSCAN12|ENSG00000158691.14|ENSG00000158691.14|0|5495	1	41
ENSG00000163626.16|mRNA|COX18|ENSG00000163626.16|ENSG00000163626.16|0|6976	1	87
ENSG00000163833.7|mRNA|FBXO40|ENSG00000163833.7|ENSG00000163833.7|0|5929	1	49
ENSG00000163874.10|mRNA|ZC3H12A|ENSG00000163874.10|ENSG00000163874.10|0|3121	1	71
ENSG00000163918.10|mRNA|RFC4|ENSG00000163918.10|ENSG00000163918.10|0|2997	1	65
ENSG00000164086.9|mRNA|DUSP7|ENSG00000164086.9|ENSG00000164086.9|0|5648	1	84
ENSG00000164116.16|mRNA|GUCY1A3|ENSG00000164116.16|ENSG00000164116.16|0|5766	1	84
ENSG00000164182.10|mRNA|NDUFAF2|ENSG00000164182.10|ENSG00000164182.10|0|1017	1	28
ENSG00000164292.12|mRNA|RHOBTB3|ENSG00000164292.12|ENSG00000164292.12|0|8833	1	21
ENSG00000164327.12|mRNA|RICTOR|ENSG00000164327.12|ENSG00000164327.12|0|13550	1	43
ENSG00000164332.7|mRNA|UBLCP1|ENSG00000164332.7|ENSG00000164332.7|0|2676	1	16
ENSG00000164338.9|mRNA|UTP15|ENSG00000164338.9|ENSG00000164338.9|0|6321	1	34
ENSG00000158717.10|mRNA|RNF166|ENSG00000158717.10|ENSG00000158717.10|0|4394	1	43
ENSG00000157954.14|mRNA|WIPI2|ENSG00000157954.14|ENSG00000157954.14|0|8977	1	95
ENSG00000149016.15|mRNA|TUT1|ENSG00000149016.15|ENSG00000149016.15|0|4082	1	93
ENSG00000151552.11|mRNA|QDPR|ENSG00000151552.11|ENSG00000151552.11|0|3059	1	82
ENSG00000149196.15|mRNA|HIKESHI|ENSG00000149196.15|ENSG00000149196.15|0|3421	1	47
ENSG00000149269.9|mRNA|PAK1|ENSG00000149269.9|ENSG00000149269.9|0|6299	1	79
ENSG00000149294.16|mRNA|NCAM1|ENSG00000149294.16|ENSG00000149294.16|0|12737	1	69
ENSG00000149311.18|mRNA|ATM|ENSG00000149311.18|ENSG00000149311.18|0|23972	1	50
ENSG00000149480.6|mRNA|MTA2|ENSG00000149480.6|ENSG00000149480.6|0|4236	1	53
ENSG00000149636.15|mRNA|DSN1|ENSG00000149636.15|ENSG00000149636.15|0|2739	1	60
ENSG00000149658.17|mRNA|YTHDF1|ENSG00000149658.17|ENSG00000149658.17|0|3301	1	97
ENSG00000150054.18|mRNA|MPP7|ENSG00000150054.18|ENSG00000150054.18|0|6167	1	86
ENSG00000150637.8|mRNA|CD226|ENSG00000150637.8|ENSG00000150637.8|0|13638	1	87
ENSG00000151239.13|mRNA|TWF1|ENSG00000151239.13|ENSG00000151239.13|0|3932	1	66
ENSG00000151366.12|mRNA|NDUFC2|ENSG00000151366.12|ENSG00000151366.12|0|2652	1	77
ENSG00000152348.15|mRNA|ATG10|ENSG00000152348.15|ENSG00000152348.15|0|5449	1	36
ENSG00000157020.17|mRNA|SEC13|ENSG00000157020.17|ENSG00000157020.17|0|5446	1	88
ENSG00000153066.12|mRNA|TXNDC11|ENSG00000153066.12|ENSG00000153066.12|0|4292	1	93
ENSG00000154229.11|mRNA|PRKCA|ENSG00000154229.11|ENSG00000154229.11|0|11152	1	90
ENSG00000154589.6|mRNA|LY96|ENSG00000154589.6|ENSG00000154589.6|0|607	1	24
ENSG00000155099.7|mRNA|TMEM55A|ENSG00000155099.7|ENSG00000155099.7|0|3066	1	98
ENSG00000155229.20|mRNA|MMS19|ENSG00000155229.20|ENSG00000155229.20|0|5849	1	44
ENSG00000155827.11|mRNA|RNF20|ENSG00000155827.11|ENSG00000155827.11|0|4694	1	66
ENSG00000156265.15|mRNA|MAP3K7CL|ENSG00000156265.15|ENSG00000156265.15|0|4497	1	42
ENSG00000156502.13|mRNA|SUPV3L1|ENSG00000156502.13|ENSG00000156502.13|0|4283	1	99
ENSG00000156711.16|mRNA|MAPK13|ENSG00000156711.16|ENSG00000156711.16|0|7197	1	95
ENSG00000156831.7|mRNA|NSMCE2|ENSG00000156831.7|ENSG00000156831.7|0|2991	1	15
ENSG00000156858.11|mRNA|PRR14|ENSG00000156858.11|ENSG00000156858.11|0|3860	1	77
hsa_circ_0092013|circRNA|hsa_circ_0092013|hsa_circ_0092013|hsa_circ_0092013|0|600	1	56

## Sheet: expression-liver-HD
feature	count	importance-rank
ENSG00000135486.17|mRNA|HNRNPA1|ENSG00000135486.17|ENSG00000135486.17|0|5093	100	7.29
ENSG00000254772.9|mRNA|EEF1G|ENSG00000254772.9|ENSG00000254772.9|0|2716	100	14.29
ENSG00000255508.7|mRNA|AP002990.1|ENSG00000255508.7|ENSG00000255508.7|0|5197	99	13.6364
ENSG00000063046.17|mRNA|EIF4B|ENSG00000063046.17|ENSG00000063046.17|0|6146	90	18.1889
ENSG00000243696.4|mRNA|AC006254.1|ENSG00000243696.4|ENSG00000243696.4|0|6315	88	24.1477
ENSG00000156508.17|mRNA|EEF1A1|ENSG00000156508.17|ENSG00000156508.17|0|5948	88	36.3523
ENSG00000064687.12|mRNA|ABCA7|ENSG00000064687.12|ENSG00000064687.12|0|8367	87	31.7586
ENSG00000145425.9|mRNA|RPS3A|ENSG00000145425.9|ENSG00000145425.9|0|2341	86	33.1163
ENSG00000125844.15|mRNA|RRBP1|ENSG00000125844.15|ENSG00000125844.15|0|6980	85	19.9529
ENSG00000231500.6|mRNA|RPS18|ENSG00000231500.6|ENSG00000231500.6|0|1898	85	36.2235
ENSG00000110917.7|mRNA|MLEC|ENSG00000110917.7|ENSG00000110917.7|0|6723	84	42.5238
ENSG00000257017.8|mRNA|HP|ENSG00000257017.8|ENSG00000257017.8|0|5405	83	17.5422
ENSG00000138795.9|mRNA|LEF1|ENSG00000138795.9|ENSG00000138795.9|0|5361	80	33.4375
ENSG00000168028.13|mRNA|RPSA|ENSG00000168028.13|ENSG00000168028.13|0|3936	78	40.8974
ENSG00000105202.8|mRNA|FBL|ENSG00000105202.8|ENSG00000105202.8|0|2173	72	44.7083
ENSG00000129128.12|mRNA|SPCS3|ENSG00000129128.12|ENSG00000129128.12|0|6831	68	24.0588
ENSG00000171564.11|mRNA|FGB|ENSG00000171564.11|ENSG00000171564.11|0|2708	64	17.7969
ENSG00000171560.14|mRNA|FGA|ENSG00000171560.14|ENSG00000171560.14|0|3956	64	25.7812
ENSG00000169203.16|mRNA|NPIPB12|ENSG00000169203.16|ENSG00000169203.16|0|4331	64	58.25
ENSG00000197746.13|mRNA|PSAP|ENSG00000197746.13|ENSG00000197746.13|0|3239	63	43.6508
ENSG00000278845.4|mRNA|MRPL45|ENSG00000278845.4|ENSG00000278845.4|0|1705	63	40.4921
ENSG00000150045.11|mRNA|KLRF1|ENSG00000150045.11|ENSG00000150045.11|0|1260	62	42.7581
ENSG00000127481.14|mRNA|UBR4|ENSG00000127481.14|ENSG00000127481.14|0|24675	62	54.6613
ENSG00000081059.19|mRNA|TCF7|ENSG00000081059.19|ENSG00000081059.19|0|10063	62	46.371
ENSG00000113905.4|mRNA|HRG|ENSG00000113905.4|ENSG00000113905.4|0|5061	61	19.0328
ENSG00000151655.18|mRNA|ITIH2|ENSG00000151655.18|ENSG00000151655.18|0|3378	60	22.0833
ENSG00000140988.15|mRNA|RPS2|ENSG00000140988.15|ENSG00000140988.15|0|2413	58	54.2069
ENSG00000166598.14|mRNA|HSP90B1|ENSG00000166598.14|ENSG00000166598.14|0|4695	56	43.1607
ENSG00000137845.14|mRNA|ADAM10|ENSG00000137845.14|ENSG00000137845.14|0|16168	55	54.8545
ENSG00000197520.10|mRNA|FAM177B|ENSG00000197520.10|ENSG00000197520.10|0|2603	54	37.463
ENSG00000185864.16|mRNA|NPIPB4|ENSG00000185864.16|ENSG00000185864.16|0|7773	54	44.9074
ENSG00000109072.13|mRNA|VTN|ENSG00000109072.13|ENSG00000109072.13|0|2427	54	56.7778
ENSG00000152291.13|mRNA|TGOLN2|ENSG00000152291.13|ENSG00000152291.13|0|7081	54	28.7222
ENSG00000213240.8|mRNA|AC239799.1|ENSG00000213240.8|ENSG00000213240.8|0|3411	53	28.0377
ENSG00000196329.11|mRNA|GIMAP5|ENSG00000196329.11|ENSG00000196329.11|0|6031	53	25.9811
ENSG00000136478.7|mRNA|TEX2|ENSG00000136478.7|ENSG00000136478.7|0|9094	52	50.6923
ENSG00000227717.4|pseudogene|AC138749.1|ENSG00000227717.4|ENSG00000227717.4|0|2472	51	59.3529
ENSG00000197894.10|mRNA|ADH5|ENSG00000197894.10|ENSG00000197894.10|0|4866	48	50.3542
ENSG00000134419.15|mRNA|RPS15A|ENSG00000134419.15|ENSG00000134419.15|0|6679	47	51.2766
ENSG00000259162.1|pseudogene|AL355075.5|ENSG00000259162.1|ENSG00000259162.1|0|992	46	62.7826
ENSG00000204010.3|mRNA|IFIT1B|ENSG00000204010.3|ENSG00000204010.3|0|1972	46	49.1957
ENSG00000251513.2|lncRNA|LIX1-AS1|ENSG00000251513.2|ENSG00000251513.2|0|1793	45	48.7778
ENSG00000281887.3|mRNA|GIMAP1-GIMAP5|ENSG00000281887.3|ENSG00000281887.3|0|2148	44	32.5909
ENSG00000180747.15|pseudogene|SMG1P3|ENSG00000180747.15|ENSG00000180747.15|0|7107	44	49.0227
ENSG00000273756.4|pseudogene|AC100756.3|ENSG00000273756.4|ENSG00000273756.4|0|1816	43	36
ENSG00000261840.2|lncRNA|AC093249.6|ENSG00000261840.2|ENSG00000261840.2|0|1148	43	37.3023
ENSG00000171863.12|mRNA|RPS7|ENSG00000171863.12|ENSG00000171863.12|0|5583	43	62.814
ENSG00000250264.1|mRNA|AL669918.1|ENSG00000250264.1|ENSG00000250264.1|0|2705	43	57.5116
ENSG00000167522.14|mRNA|ANKRD11|ENSG00000167522.14|ENSG00000167522.14|0|16949	43	46.3953
ENSG00000124614.13|mRNA|RPS10|ENSG00000124614.13|ENSG00000124614.13|0|1642	42	66.9048
ENSG00000163631.16|mRNA|ALB|ENSG00000163631.16|ENSG00000163631.16|0|3377	41	20.6098
ENSG00000091513.14|mRNA|TF|ENSG00000091513.14|ENSG00000091513.14|0|8565	40	20.4
ENSG00000180229.12|pseudogene|HERC2P3|ENSG00000180229.12|ENSG00000180229.12|0|9413	40	48.95
ENSG00000107485.15|mRNA|GATA3|ENSG00000107485.15|ENSG00000107485.15|0|3253	39	51.4103
ENSG00000062524.15|mRNA|LTK|ENSG00000062524.15|ENSG00000062524.15|0|3490	38	66.2368
ENSG00000118181.10|mRNA|RPS25|ENSG00000118181.10|ENSG00000118181.10|0|1477	37	58.4054
ENSG00000073861.2|mRNA|TBX21|ENSG00000073861.2|ENSG00000073861.2|0|2614	37	34.4595
ENSG00000142192.20|mRNA|APP|ENSG00000142192.20|ENSG00000142192.20|0|6316	37	64.3514
ENSG00000090554.12|mRNA|FLT3LG|ENSG00000090554.12|ENSG00000090554.12|0|2846	37	29.8919
ENSG00000183604.14|pseudogene|SMG1P5|ENSG00000183604.14|ENSG00000183604.14|0|4791	37	60.8108
ENSG00000123104.11|mRNA|ITPR2|ENSG00000123104.11|ENSG00000123104.11|0|12750	37	58.3784
ENSG00000273976.1|mRNA|GOLGA6L1|ENSG00000273976.1|ENSG00000273976.1|0|2620	37	53.7297
ENSG00000271425.7|mRNA|NBPF10|ENSG00000271425.7|ENSG00000271425.7|0|13249	36	49.0833
ENSG00000105193.8|mRNA|RPS16|ENSG00000105193.8|ENSG00000105193.8|0|2603	36	51
ENSG00000185710.9|pseudogene|SMG1P4|ENSG00000185710.9|ENSG00000185710.9|0|6290	36	62.5
ENSG00000174450.11|mRNA|GOLGA6L2|ENSG00000174450.11|ENSG00000174450.11|0|3030	35	49.9714
ENSG00000164332.7|mRNA|UBLCP1|ENSG00000164332.7|ENSG00000164332.7|0|2676	35	44.4857
ENSG00000115461.4|mRNA|IGFBP5|ENSG00000115461.4|ENSG00000115461.4|0|6442	35	55.2
ENSG00000104408.9|mRNA|EIF3E|ENSG00000104408.9|ENSG00000104408.9|0|6005	34	39.4412
ENSG00000132182.11|mRNA|NUP210|ENSG00000132182.11|ENSG00000132182.11|0|8182	33	39.4545
ENSG00000279738.1|lncRNA|AL022311.1|ENSG00000279738.1|ENSG00000279738.1|0|19416	32	43.875
ENSG00000147677.10|mRNA|EIF3H|ENSG00000147677.10|ENSG00000147677.10|0|6434	31	53.6774
ENSG00000148541.12|mRNA|FAM13C|ENSG00000148541.12|ENSG00000148541.12|0|6753	31	47.0645
ENSG00000093010.13|mRNA|COMT|ENSG00000093010.13|ENSG00000093010.13|0|5195	30	62.2
ENSG00000184702.18|mRNA|SEPT5|ENSG00000184702.18|ENSG00000184702.18|0|5914	30	57.4
ENSG00000254975.1|lncRNA|AP001189.4|ENSG00000254975.1|ENSG00000254975.1|0|452	30	48.4333
ENSG00000114737.15|mRNA|CISH|ENSG00000114737.15|ENSG00000114737.15|0|5112	30	46.7
ENSG00000103249.17|mRNA|CLCN7|ENSG00000103249.17|ENSG00000103249.17|0|8119	29	50.8621
ENSG00000151914.19|mRNA|DST|ENSG00000151914.19|ENSG00000151914.19|0|42341	29	42.6552
ENSG00000074370.17|mRNA|ATP2A3|ENSG00000074370.17|ENSG00000074370.17|0|6893	29	65.5517
ENSG00000226310.1|lncRNA|AL022157.1|ENSG00000226310.1|ENSG00000226310.1|0|665	29	61.8276
ENSG00000027869.11|mRNA|SH2D2A|ENSG00000027869.11|ENSG00000027869.11|0|2512	29	42.4138
ENSG00000035687.9|mRNA|ADSS|ENSG00000035687.9|ENSG00000035687.9|0|3666	29	56.1379
ENSG00000112306.7|mRNA|RPS12|ENSG00000112306.7|ENSG00000112306.7|0|767	29	42.3103
ENSG00000169432.14|mRNA|SCN9A|ENSG00000169432.14|ENSG00000169432.14|0|10364	28	49.2857
ENSG00000126756.11|mRNA|UXT|ENSG00000126756.11|ENSG00000126756.11|0|1243	28	49.4286
ENSG00000185697.16|mRNA|MYBL1|ENSG00000185697.16|ENSG00000185697.16|0|7239	28	45.2857
ENSG00000116701.14|mRNA|NCF2|ENSG00000116701.14|ENSG00000116701.14|0|2928	27	52
ENSG00000085662.13|mRNA|AKR1B1|ENSG00000085662.13|ENSG00000085662.13|0|3660	27	45.2963
ENSG00000196576.14|mRNA|PLXNB2|ENSG00000196576.14|ENSG00000196576.14|0|7257	27	38.9259
ENSG00000052841.14|mRNA|TTC17|ENSG00000052841.14|ENSG00000052841.14|0|11284	27	49.1852
ENSG00000237651.6|mRNA|C2orf74|ENSG00000237651.6|ENSG00000237651.6|0|1515	26	58.5769
ENSG00000171204.12|mRNA|TMEM126B|ENSG00000171204.12|ENSG00000171204.12|0|2416	26	58.8462
ENSG00000265399.1|lncRNA|AP005329.2|ENSG00000265399.1|ENSG00000265399.1|0|1771	26	57
ENSG00000108679.12|mRNA|LGALS3BP|ENSG00000108679.12|ENSG00000108679.12|0|3584	25	38.12
ENSG00000143344.15|mRNA|RGL1|ENSG00000143344.15|ENSG00000143344.15|0|5305	24	54.125
ENSG00000163541.11|mRNA|SUCLG1|ENSG00000163541.11|ENSG00000163541.11|0|4286	24	57.0417
ENSG00000117281.15|mRNA|CD160|ENSG00000117281.15|ENSG00000117281.15|0|3971	24	42.125
ENSG00000129158.10|mRNA|SERGEF|ENSG00000129158.10|ENSG00000129158.10|0|3502	24	38.75
ENSG00000167645.16|mRNA|YIF1B|ENSG00000167645.16|ENSG00000167645.16|0|3193	24	65.5417
ENSG00000239264.8|mRNA|TXNDC5|ENSG00000239264.8|ENSG00000239264.8|0|4387	24	72.1667
ENSG00000175265.17|mRNA|GOLGA8A|ENSG00000175265.17|ENSG00000175265.17|0|6750	23	44.3913
ENSG00000265972.5|mRNA|TXNIP|ENSG00000265972.5|ENSG00000265972.5|0|3625	23	22.1304
ENSG00000243716.10|mRNA|NPIPB5|ENSG00000243716.10|ENSG00000243716.10|0|10005	23	62.6087
ENSG00000155660.10|mRNA|PDIA4|ENSG00000155660.10|ENSG00000155660.10|0|3277	23	53.6522
ENSG00000260342.2|mRNA|AC138811.2|ENSG00000260342.2|ENSG00000260342.2|0|764	23	67.6087
ENSG00000091583.10|mRNA|APOH|ENSG00000091583.10|ENSG00000091583.10|0|1332	23	26
ENSG00000135144.7|mRNA|DTX1|ENSG00000135144.7|ENSG00000135144.7|0|4387	22	38.4091
ENSG00000124193.14|mRNA|SRSF6|ENSG00000124193.14|ENSG00000124193.14|0|4593	22	45.4545
ENSG00000196547.14|mRNA|MAN2A2|ENSG00000196547.14|ENSG00000196547.14|0|10002	22	42.8182
ENSG00000120438.11|mRNA|TCP1|ENSG00000120438.11|ENSG00000120438.11|0|4929	22	45.8636
ENSG00000234906.9|mRNA|APOC2|ENSG00000234906.9|ENSG00000234906.9|0|1316	22	33.1818
ENSG00000167632.14|mRNA|TRAPPC9|ENSG00000167632.14|ENSG00000167632.14|0|7055	22	50.9545
ENSG00000147649.9|mRNA|MTDH|ENSG00000147649.9|ENSG00000147649.9|0|6391	22	42.5909
ENSG00000254877.1|pseudogene|AP001636.2|ENSG00000254877.1|ENSG00000254877.1|0|696	22	45.2273
ENSG00000112769.18|mRNA|LAMA4|ENSG00000112769.18|ENSG00000112769.18|0|11575	22	60.5909
ENSG00000151491.12|mRNA|EPS8|ENSG00000151491.12|ENSG00000151491.12|0|6200	21	67.1429
ENSG00000270231.3|pseudogene|NBPF8|ENSG00000270231.3|ENSG00000270231.3|0|5330	21	51.2857
ENSG00000109475.16|mRNA|RPL34|ENSG00000109475.16|ENSG00000109475.16|0|3393	21	73.4286
ENSG00000114923.16|mRNA|SLC4A3|ENSG00000114923.16|ENSG00000114923.16|0|5091	21	69.2857
[truncated: 1,208 more rows]

## Sheet: expression-lung-HD
feature	count	importance-rank
[truncated: 1,691 more rows]

## Sheet: expression-esophagus-HD
feature	count	importance-rank
[truncated: 2,506 more rows]

## Sheet: kraken2-cancer-HD
feature	count	importance-rank
[truncated: 487 more rows]

[truncated: 9 more sheets: bowtie2-cancer-HD, kraken2-colorectum-HD, bowtie2-colorectum-HD, kraken2-stomach-HD, bowtie2-stomach-HD, kraken2-lung-HD, bowtie2-lung-HD, kraken2-esophagus-HD, bowtie2-esophagus-HD]
