# Supplementary material for: Cancer type classification using plasma cell-free RNAs derived from human and microbes
Source: eLife. 2022 Jul 11;11:e75181. doi: 10.7554/eLife.75181 (PMC9273212; doi:10.7554/eLife.75181)
Supplement: Supplementary file 8. [file elife-75181-supp8.xlsx]

## Sheet: expression
feature	count	importance-rank
ENSG00000125844.15|mRNA|RRBP1|ENSG00000125844.15|ENSG00000125844.15|0|6980	99	8.08081
ENSG00000064687.12|mRNA|ABCA7|ENSG00000064687.12|ENSG00000064687.12|0|8367	99	37.303
ENSG00000206588.1|snRNA|RNU1-28P|ENSG00000206588.1|ENSG00000206588.1|0|164	99	75.5859
ENSG00000163631.16|mRNA|ALB|ENSG00000163631.16|ENSG00000163631.16|0|3377	96	111.208
ENSG00000179583.18|mRNA|CIITA|ENSG00000179583.18|ENSG00000179583.18|0|14503	94	76.2872
ENSG00000155660.10|mRNA|PDIA4|ENSG00000155660.10|ENSG00000155660.10|0|3277	93	41.8065
ENSG00000166598.14|mRNA|HSP90B1|ENSG00000166598.14|ENSG00000166598.14|0|4695	93	81.129
ENSG00000113905.4|mRNA|HRG|ENSG00000113905.4|ENSG00000113905.4|0|5061	92	43.6413
ENSG00000132182.11|mRNA|NUP210|ENSG00000132182.11|ENSG00000132182.11|0|8182	90	56.7444
ENSG00000196576.14|mRNA|PLXNB2|ENSG00000196576.14|ENSG00000196576.14|0|7257	90	79.1444
ENSG00000114923.16|mRNA|SLC4A3|ENSG00000114923.16|ENSG00000114923.16|0|5091	89	85.0337
ENSG00000229961.2|pseudogene|AL357143.1|ENSG00000229961.2|ENSG00000229961.2|0|5817	89	117.944
ENSG00000263934.4|snoRNA|SNORD3A|ENSG00000263934.4|ENSG00000263934.4|0|699	88	96.125
hsa_circ_0036999|circRNA|hsa_circ_0036999|hsa_circ_0036999|hsa_circ_0036999|0|600	88	152.42
ENSG00000115590.13|mRNA|IL1R2|ENSG00000115590.13|ENSG00000115590.13|0|3073	86	84.593
ENSG00000169203.16|mRNA|NPIPB12|ENSG00000169203.16|ENSG00000169203.16|0|4331	86	113.233
ENSG00000117713.18|mRNA|ARID1A|ENSG00000117713.18|ENSG00000117713.18|0|15922	86	121.663
ENSG00000052841.14|mRNA|TTC17|ENSG00000052841.14|ENSG00000052841.14|0|11284	85	107.518
hsa_circ_0006008|circRNA|hsa_circ_0006008|hsa_circ_0006008|hsa_circ_0006008|0|600	85	144.941
ENSG00000225885.6|lncRNA|AC023590.1|ENSG00000225885.6|ENSG00000225885.6|0|1617	84	73.7857
ENSG00000273976.1|mRNA|GOLGA6L1|ENSG00000273976.1|ENSG00000273976.1|0|2620	84	182.476
ENSG00000215908.10|pseudogene|CROCCP2|ENSG00000215908.10|ENSG00000215908.10|0|5606	83	94.3976
ENSG00000096060.14|mRNA|FKBP5|ENSG00000096060.14|ENSG00000096060.14|0|10628	83	98.7108
ENSG00000257017.8|mRNA|HP|ENSG00000257017.8|ENSG00000257017.8|0|5405	83	120.072
ENSG00000185864.16|mRNA|NPIPB4|ENSG00000185864.16|ENSG00000185864.16|0|7773	83	130.518
ENSG00000169432.14|mRNA|SCN9A|ENSG00000169432.14|ENSG00000169432.14|0|10364	82	54.8902
hsa_circ_0001574|circRNA|hsa_circ_0001574|hsa_circ_0001574|hsa_circ_0001574|0|600	82	132.439
ENSG00000204469.12|mRNA|PRRC2A|ENSG00000204469.12|ENSG00000204469.12|0|9115	82	147.341
ENSG00000265185.5|snoRNA|SNORD3B-1|ENSG00000265185.5|ENSG00000265185.5|0|758	81	104.617
ENSG00000198178.10|mRNA|CLEC4C|ENSG00000198178.10|ENSG00000198178.10|0|1551	80	125.388
ENSG00000214176.9|pseudogene|PLEKHM1P1|ENSG00000214176.9|ENSG00000214176.9|0|8469	79	80.557
ENSG00000239961.2|mRNA|LILRA4|ENSG00000239961.2|ENSG00000239961.2|0|2171	79	136.696
ENSG00000130309.10|mRNA|COLGALT1|ENSG00000130309.10|ENSG00000130309.10|0|4900	79	154.228
ENSG00000175265.17|mRNA|GOLGA8A|ENSG00000175265.17|ENSG00000175265.17|0|6750	78	58.6154
ENSG00000131871.14|mRNA|SELENOS|ENSG00000131871.14|ENSG00000131871.14|0|3766	78	134.244
ENSG00000111788.10|pseudogene|AC009533.1|ENSG00000111788.10|ENSG00000111788.10|0|3158	77	127.753
ENSG00000148154.9|mRNA|UGCG|ENSG00000148154.9|ENSG00000148154.9|0|4615	77	152
ENSG00000177239.14|mRNA|MAN1B1|ENSG00000177239.14|ENSG00000177239.14|0|8331	75	127.707
ENSG00000197283.15|mRNA|SYNGAP1|ENSG00000197283.15|ENSG00000197283.15|0|12124	74	127.622
ENSG00000171564.11|mRNA|FGB|ENSG00000171564.11|ENSG00000171564.11|0|2708	74	159.676
ENSG00000173327.7|mRNA|MAP3K11|ENSG00000173327.7|ENSG00000173327.7|0|10564	73	182.356
ENSG00000275210.1|lncRNA|AC245884.11|ENSG00000275210.1|ENSG00000275210.1|0|1734	72	161.972
ENSG00000093072.15|mRNA|ADA2|ENSG00000093072.15|ENSG00000093072.15|0|5800	71	115.07
hsa_circ_0004803|circRNA|hsa_circ_0004803|hsa_circ_0004803|hsa_circ_0004803|0|600	71	140.789
ENSG00000132465.10|mRNA|JCHAIN|ENSG00000132465.10|ENSG00000132465.10|0|1680	70	83.3714
ENSG00000023171.16|mRNA|GRAMD1B|ENSG00000023171.16|ENSG00000023171.16|0|14408	69	89.2029
ENSG00000185291.11|mRNA|IL3RA|ENSG00000185291.11|ENSG00000185291.11|0|1710	68	86.1176
ENSG00000166428.12|mRNA|PLD4|ENSG00000166428.12|ENSG00000166428.12|0|6874	68	98.5735
ENSG00000105953.14|mRNA|OGDH|ENSG00000105953.14|ENSG00000105953.14|0|5210	68	159.294
ENSG00000197912.14|mRNA|SPG7|ENSG00000197912.14|ENSG00000197912.14|0|11918	67	142.851
ENSG00000110851.11|mRNA|PRDM4|ENSG00000110851.11|ENSG00000110851.11|0|4777	67	173.284
hsa_circ_0009053|circRNA|hsa_circ_0009053|hsa_circ_0009053|hsa_circ_0009053|0|526	66	135
hsa_circ_0005567|circRNA|hsa_circ_0005567|hsa_circ_0005567|hsa_circ_0005567|0|600	66	144.182
ENSG00000273756.4|pseudogene|AC100756.3|ENSG00000273756.4|ENSG00000273756.4|0|1816	66	199.697
ENSG00000169032.9|mRNA|MAP2K1|ENSG00000169032.9|ENSG00000169032.9|0|3759	65	184.062
hsa_circ_0003001|circRNA|hsa_circ_0003001|hsa_circ_0003001|hsa_circ_0003001|0|600	65	194.6
ENSG00000243716.10|mRNA|NPIPB5|ENSG00000243716.10|ENSG00000243716.10|0|10005	65	223.892
ENSG00000166523.7|mRNA|CLEC4E|ENSG00000166523.7|ENSG00000166523.7|0|2422	64	138.281
ENSG00000186432.8|mRNA|KPNA4|ENSG00000186432.8|ENSG00000186432.8|0|9413	64	174.062
ENSG00000164105.3|mRNA|SAP30|ENSG00000164105.3|ENSG00000164105.3|0|1320	64	188.172
ENSG00000277053.4|pseudogene|GTF2IP1|ENSG00000277053.4|ENSG00000277053.4|0|7453	64	224.469
ENSG00000213213.13|mRNA|CCDC183|ENSG00000213213.13|ENSG00000213213.13|0|2964	63	141.254
hsa_circ_0001696|circRNA|hsa_circ_0001696|hsa_circ_0001696|hsa_circ_0001696|0|600	63	145.365
ENSG00000196652.11|mRNA|ZKSCAN5|ENSG00000196652.11|ENSG00000196652.11|0|6056	63	146.587
ENSG00000181222.15|mRNA|POLR2A|ENSG00000181222.15|ENSG00000181222.15|0|8355	63	160.079
ENSG00000171560.14|mRNA|FGA|ENSG00000171560.14|ENSG00000171560.14|0|3956	62	84.0161
ENSG00000215252.11|mRNA|GOLGA8B|ENSG00000215252.11|ENSG00000215252.11|0|7670	62	90.2581
ENSG00000132386.10|mRNA|SERPINF1|ENSG00000132386.10|ENSG00000132386.10|0|3069	62	108.726
ENSG00000073060.15|mRNA|SCARB1|ENSG00000073060.15|ENSG00000073060.15|0|7741	62	177.145
ENSG00000223705.9|pseudogene|NSUN5P1|ENSG00000223705.9|ENSG00000223705.9|0|4822	62	222.806
ENSG00000030582.17|mRNA|GRN|ENSG00000030582.17|ENSG00000030582.17|0|3680	61	116.689
ENSG00000111249.13|mRNA|CUX2|ENSG00000111249.13|ENSG00000111249.13|0|7648	61	136.033
ENSG00000284707.1|lncRNA|AC079781.5|ENSG00000284707.1|ENSG00000284707.1|0|4295	61	205.426
ENSG00000118816.9|mRNA|CCNI|ENSG00000118816.9|ENSG00000118816.9|0|3741	61	228.459
ENSG00000277865.4|mRNA|GOLGA6L22|ENSG00000277865.4|ENSG00000277865.4|0|4405	61	230.869
ENSG00000227717.4|pseudogene|AC138749.1|ENSG00000227717.4|ENSG00000227717.4|0|2472	60	240.967
ENSG00000012817.15|mRNA|KDM5D|ENSG00000012817.15|ENSG00000012817.15|0|9463	59	133.831
ENSG00000010610.9|mRNA|CD4|ENSG00000010610.9|ENSG00000010610.9|0|4583	59	157.831
ENSG00000054392.12|mRNA|HHAT|ENSG00000054392.12|ENSG00000054392.12|0|6641	59	168.424
ENSG00000215769.8|lncRNA|ARHGAP27P1-BPTFP1-KPNA2P3|ENSG00000215769.8|ENSG00000215769.8|0|3038	59	170.78
ENSG00000176978.13|mRNA|DPP7|ENSG00000176978.13|ENSG00000176978.13|0|2820	59	208.492
ENSG00000099958.14|mRNA|DERL3|ENSG00000099958.14|ENSG00000099958.14|0|3796	59	209.136
ENSG00000143515.16|mRNA|ATP8B2|ENSG00000143515.16|ENSG00000143515.16|0|7572	58	168.086
ENSG00000266820.1|pseudogene|KPNA2P3|ENSG00000266820.1|ENSG00000266820.1|0|848	58	179.879
ENSG00000163346.16|mRNA|PBXIP1|ENSG00000163346.16|ENSG00000163346.16|0|3851	58	183.397
ENSG00000264940.4|snoRNA|SNORD3C|ENSG00000264940.4|ENSG00000264940.4|0|581	58	242.328
ENSG00000091583.10|mRNA|APOH|ENSG00000091583.10|ENSG00000091583.10|0|1332	57	127.86
hsa_circ_0003290|circRNA|hsa_circ_0003290|hsa_circ_0003290|hsa_circ_0003290|0|340	57	128.579
ENSG00000136068.14|mRNA|FLNB|ENSG00000136068.14|ENSG00000136068.14|0|13952	57	175.421
ENSG00000177947.13|mRNA|ODF3|ENSG00000177947.13|ENSG00000177947.13|0|3110	57	178.263
ENSG00000206596.1|snRNA|RNU1-27P|ENSG00000206596.1|ENSG00000206596.1|0|164	57	200.228
ENSG00000197081.12|mRNA|IGF2R|ENSG00000197081.12|ENSG00000197081.12|0|14911	57	247.474
ENSG00000103249.17|mRNA|CLCN7|ENSG00000103249.17|ENSG00000103249.17|0|8119	56	197.179
ENSG00000250658.1|lncRNA|AC097652.1|ENSG00000250658.1|ENSG00000250658.1|0|2114	56	229.768
ENSG00000262202.4|lncRNA|AC007952.4|ENSG00000262202.4|ENSG00000262202.4|0|637	56	237.607
ENSG00000105726.16|mRNA|ATP13A1|ENSG00000105726.16|ENSG00000105726.16|0|8376	55	145
ENSG00000091073.19|mRNA|DTX2|ENSG00000091073.19|ENSG00000091073.19|0|5042	55	155.2
ENSG00000196562.14|mRNA|SULF2|ENSG00000196562.14|ENSG00000196562.14|0|6657	55	162.582
ENSG00000167548.14|mRNA|KMT2D|ENSG00000167548.14|ENSG00000167548.14|0|20476	55	163.745
ENSG00000062524.15|mRNA|LTK|ENSG00000062524.15|ENSG00000062524.15|0|3490	54	47.9815
ENSG00000185485.14|pseudogene|SDHAP1|ENSG00000185485.14|ENSG00000185485.14|0|3353	54	231.148
ENSG00000164142.15|mRNA|FAM160A1|ENSG00000164142.15|ENSG00000164142.15|0|4932	53	122.887
hsa_circ_0002468|circRNA|hsa_circ_0002468|hsa_circ_0002468|hsa_circ_0002468|0|600	53	198.358
ENSG00000276168.1|srpRNA|RN7SL1|ENSG00000276168.1|ENSG00000276168.1|0|299	53	199.094
ENSG00000110344.9|mRNA|UBE4A|ENSG00000110344.9|ENSG00000110344.9|0|6576	53	204.906
ENSG00000198848.12|mRNA|CES1|ENSG00000198848.12|ENSG00000198848.12|0|2937	53	212.698
ENSG00000163625.15|mRNA|WDFY3|ENSG00000163625.15|ENSG00000163625.15|0|16856	53	247.698
ENSG00000167173.18|mRNA|C15orf39|ENSG00000167173.18|ENSG00000167173.18|0|5812	52	142.981
ENSG00000198223.16|mRNA|CSF2RA|ENSG00000198223.16|ENSG00000198223.16|0|3830	52	192.788
ENSG00000182831.11|mRNA|C16orf72|ENSG00000182831.11|ENSG00000182831.11|0|15875	52	198.673
ENSG00000162551.13|mRNA|ALPL|ENSG00000162551.13|ENSG00000162551.13|0|3007	52	229.462
ENSG00000163902.11|mRNA|RPN1|ENSG00000163902.11|ENSG00000163902.11|0|3992	52	280.808
ENSG00000283029.1|lncRNA|AL139099.5|ENSG00000283029.1|ENSG00000283029.1|0|300	51	193.294
hsa_circ_0071095|circRNA|hsa_circ_0071095|hsa_circ_0071095|hsa_circ_0071095|0|426	51	214.804
ENSG00000162337.11|mRNA|LRP5|ENSG00000162337.11|ENSG00000162337.11|0|6164	50	104.12
ENSG00000242435.1|pseudogene|UPK3BP1|ENSG00000242435.1|ENSG00000242435.1|0|509	50	141.7
ENSG00000135596.17|mRNA|MICAL1|ENSG00000135596.17|ENSG00000135596.17|0|7056	50	162.28
ENSG00000266714.7|mRNA|MYO15B|ENSG00000266714.7|ENSG00000266714.7|0|12761	50	197.42
ENSG00000060237.16|mRNA|WNK1|ENSG00000060237.16|ENSG00000060237.16|0|14370	50	204.48
ENSG00000263647.1|pseudogene|BPTFP1|ENSG00000263647.1|ENSG00000263647.1|0|492	50	210.46
ENSG00000270231.3|pseudogene|NBPF8|ENSG00000270231.3|ENSG00000270231.3|0|5330	50	236.78
ENSG00000055955.15|mRNA|ITIH4|ENSG00000055955.15|ENSG00000055955.15|0|5462	49	190.122
ENSG00000158874.11|mRNA|APOA2|ENSG00000158874.11|ENSG00000158874.11|0|945	49	204.449
hsa_circ_0042749|circRNA|hsa_circ_0042749|hsa_circ_0042749|hsa_circ_0042749|0|600	49	215.061
ENSG00000153827.13|mRNA|TRIP12|ENSG00000153827.13|ENSG00000153827.13|0|12594	49	257.49
ENSG00000149418.10|mRNA|ST14|ENSG00000149418.10|ENSG00000149418.10|0|4350	48	100.188
ENSG00000141458.12|mRNA|NPC1|ENSG00000141458.12|ENSG00000141458.12|0|10102	48	114.438
hsa_circ_0029634|circRNA|hsa_circ_0029634|hsa_circ_0029634|hsa_circ_0029634|0|492	48	183.854
ENSG00000133961.19|mRNA|NUMB|ENSG00000133961.19|ENSG00000133961.19|0|10760	48	189.229
ENSG00000167483.17|mRNA|FAM129C|ENSG00000167483.17|ENSG00000167483.17|0|6628	47	129.021
ENSG00000185507.19|mRNA|IRF7|ENSG00000185507.19|ENSG00000185507.19|0|2628	47	129.128
ENSG00000100219.16|mRNA|XBP1|ENSG00000100219.16|ENSG00000100219.16|0|3028	47	148.723
ENSG00000105808.17|mRNA|RASA4|ENSG00000105808.17|ENSG00000105808.17|0|8077	47	259.128
ENSG00000135916.15|mRNA|ITM2C|ENSG00000135916.15|ENSG00000135916.15|0|2611	46	12.9565
ENSG00000130649.9|mRNA|CYP2E1|ENSG00000130649.9|ENSG00000130649.9|0|9621	46	114.239
hsa_circ_0005197|circRNA|hsa_circ_0005197|hsa_circ_0005197|hsa_circ_0005197|0|600	46	269.457
ENSG00000051108.14|mRNA|HERPUD1|ENSG00000051108.14|ENSG00000051108.14|0|5155	45	112.756
ENSG00000007001.12|mRNA|UPP2|ENSG00000007001.12|ENSG00000007001.12|0|2957	45	189.356
ENSG00000185710.9|pseudogene|SMG1P4|ENSG00000185710.9|ENSG00000185710.9|0|6290	45	227.644
ENSG00000223929.1|lncRNA|MIR4432HG|ENSG00000223929.1|ENSG00000223929.1|0|1044	45	250.267
hsa_circ_0000337|circRNA|hsa_circ_0000337|hsa_circ_0000337|hsa_circ_0000337|0|600	44	167.818
ENSG00000172534.13|mRNA|HCFC1|ENSG00000172534.13|ENSG00000172534.13|0|9004	44	183.5
ENSG00000110697.12|mRNA|PITPNM1|ENSG00000110697.12|ENSG00000110697.12|0|6449	44	203.977
hsa_circ_0002428|circRNA|hsa_circ_0002428|hsa_circ_0002428|hsa_circ_0002428|0|600	44	220.636
hsa_circ_0071030|circRNA|hsa_circ_0071030|hsa_circ_0071030|hsa_circ_0071030|0|600	44	233.455
ENSG00000143297.18|mRNA|FCRL5|ENSG00000143297.18|ENSG00000143297.18|0|12419	43	132.907
ENSG00000164047.4|mRNA|CAMP|ENSG00000164047.4|ENSG00000164047.4|0|745	43	163.977
ENSG00000169223.14|mRNA|LMAN2|ENSG00000169223.14|ENSG00000169223.14|0|2357	43	181.209
ENSG00000090581.9|mRNA|GNPTG|ENSG00000090581.9|ENSG00000090581.9|0|4102	43	181.256
ENSG00000101152.10|mRNA|DNAJC5|ENSG00000101152.10|ENSG00000101152.10|0|5287	43	181.814
ENSG00000132334.16|mRNA|PTPRE|ENSG00000132334.16|ENSG00000132334.16|0|11235	43	183.14
ENSG00000241764.3|lncRNA|AC002467.1|ENSG00000241764.3|ENSG00000241764.3|0|984	43	196.233
ENSG00000077097.15|mRNA|TOP2B|ENSG00000077097.15|ENSG00000077097.15|0|6044	43	221.512
ENSG00000134369.15|mRNA|NAV1|ENSG00000134369.15|ENSG00000134369.15|0|22453	43	265.651
ENSG00000167615.16|mRNA|LENG8|ENSG00000167615.16|ENSG00000167615.16|0|6469	42	120.262
ENSG00000254681.6|pseudogene|PKD1P5|ENSG00000254681.6|ENSG00000254681.6|0|10291	42	170.524
ENSG00000129566.12|mRNA|TEP1|ENSG00000129566.12|ENSG00000129566.12|0|11328	42	177.905
ENSG00000134250.19|mRNA|NOTCH2|ENSG00000134250.19|ENSG00000134250.19|0|16807	42	178.429
ENSG00000008516.16|mRNA|MMP25|ENSG00000008516.16|ENSG00000008516.16|0|4126	42	194.048
ENSG00000105404.10|mRNA|RABAC1|ENSG00000105404.10|ENSG00000105404.10|0|1999	42	205.69
hsa_circ_0004189|circRNA|hsa_circ_0004189|hsa_circ_0004189|hsa_circ_0004189|0|600	42	215.714
ENSG00000251562.7|lncRNA|MALAT1|ENSG00000251562.7|ENSG00000251562.7|0|8755	42	218.429
ENSG00000277947.1|snoRNA|SNORD3D|ENSG00000277947.1|ENSG00000277947.1|0|218	42	244.476
hsa_circ_0079344|circRNA|hsa_circ_0079344|hsa_circ_0079344|hsa_circ_0079344|0|600	42	246.952
ENSG00000265479.6|lncRNA|DTX2P1-UPK3BP1-PMS2P11|ENSG00000265479.6|ENSG00000265479.6|0|5053	42	259.119
ENSG00000228315.11|lncRNA|GUSBP11|ENSG00000228315.11|ENSG00000228315.11|0|6550	41	174.878
ENSG00000110719.9|mRNA|TCIRG1|ENSG00000110719.9|ENSG00000110719.9|0|4384	41	186.171
hsa_circ_0091024|circRNA|hsa_circ_0091024|hsa_circ_0091024|hsa_circ_0091024|0|600	41	194.39
ENSG00000100697.14|mRNA|DICER1|ENSG00000100697.14|ENSG00000100697.14|0|12294	41	214.073
ENSG00000229314.5|mRNA|ORM1|ENSG00000229314.5|ENSG00000229314.5|0|901	41	214.659
ENSG00000145569.5|mRNA|FAM105A|ENSG00000145569.5|ENSG00000145569.5|0|4074	41	225.61
ENSG00000135074.15|mRNA|ADAM19|ENSG00000135074.15|ENSG00000135074.15|0|7704	41	242.561
ENSG00000180747.15|pseudogene|SMG1P3|ENSG00000180747.15|ENSG00000180747.15|0|7107	41	277.22
hsa_circ_0057795|circRNA|hsa_circ_0057795|hsa_circ_0057795|hsa_circ_0057795|0|600	41	278.634
ENSG00000100368.13|mRNA|CSF2RB|ENSG00000100368.13|ENSG00000100368.13|0|5000	40	156.175
ENSG00000155256.17|mRNA|ZFYVE27|ENSG00000155256.17|ENSG00000155256.17|0|3899	40	189.275
ENSG00000169221.13|mRNA|TBC1D10B|ENSG00000169221.13|ENSG00000169221.13|0|6699	40	195.475
ENSG00000126461.14|mRNA|SCAF1|ENSG00000126461.14|ENSG00000126461.14|0|4548	40	217
hsa_circ_0027093|circRNA|hsa_circ_0027093|hsa_circ_0027093|hsa_circ_0027093|0|600	40	234.9
ENSG00000106829.18|mRNA|TLE4|ENSG00000106829.18|ENSG00000106829.18|0|8187	40	243.1
ENSG00000169894.17|mRNA|MUC3A|ENSG00000169894.17|ENSG00000169894.17|0|11374	39	172.256
ENSG00000140836.15|mRNA|ZFHX3|ENSG00000140836.15|ENSG00000140836.15|0|19753	39	172.949
ENSG00000162585.16|mRNA|FAAP20|ENSG00000162585.16|ENSG00000162585.16|0|10916	39	187.846
hsa_circ_0015124|circRNA|hsa_circ_0015124|hsa_circ_0015124|hsa_circ_0015124|0|600	39	201.179
ENSG00000103740.9|mRNA|ACSBG1|ENSG00000103740.9|ENSG00000103740.9|0|8230	39	210
hsa_circ_0006186|circRNA|hsa_circ_0006186|hsa_circ_0006186|hsa_circ_0006186|0|600	39	232.154
ENSG00000196839.12|mRNA|ADA|ENSG00000196839.12|ENSG00000196839.12|0|2852	39	255.744
ENSG00000170832.12|mRNA|USP32|ENSG00000170832.12|ENSG00000170832.12|0|7755	39	257.641
ENSG00000117899.10|mRNA|MESD|ENSG00000117899.10|ENSG00000117899.10|0|7510	39	257.974
ENSG00000262302.1|mRNA|AC003688.1|ENSG00000262302.1|ENSG00000262302.1|0|489	39	266.795
hsa_circ_0078786|circRNA|hsa_circ_0078786|hsa_circ_0078786|hsa_circ_0078786|0|380	39	281.974
ENSG00000044574.7|mRNA|HSPA5|ENSG00000044574.7|ENSG00000044574.7|0|3908	38	56.3158
ENSG00000091513.14|mRNA|TF|ENSG00000091513.14|ENSG00000091513.14|0|8565	38	105.053
ENSG00000163945.16|mRNA|UVSSA|ENSG00000163945.16|ENSG00000163945.16|0|15773	38	111.158
ENSG00000110057.7|mRNA|UNC93B1|ENSG00000110057.7|ENSG00000110057.7|0|3548	38	195.921
ENSG00000054967.12|mRNA|RELT|ENSG00000054967.12|ENSG00000054967.12|0|6322	38	200.421
ENSG00000149600.11|mRNA|COMMD7|ENSG00000149600.11|ENSG00000149600.11|0|2584	38	209.763
ENSG00000280560.1|lncRNA|AL138924.1|ENSG00000280560.1|ENSG00000280560.1|0|415	38	219.263
ENSG00000064763.10|mRNA|FAR2|ENSG00000064763.10|ENSG00000064763.10|0|5411	38	266.579
ENSG00000116698.21|mRNA|SMG7|ENSG00000116698.21|ENSG00000116698.21|0|8317	38	282.842
ENSG00000197629.5|mRNA|MPEG1|ENSG00000197629.5|ENSG00000197629.5|0|4442	37	76.2432
hsa_circ_0016733|circRNA|hsa_circ_0016733|hsa_circ_0016733|hsa_circ_0016733|0|600	37	170.703
ENSG00000152492.13|mRNA|CCDC50|ENSG00000152492.13|ENSG00000152492.13|0|9202	37	233.135
ENSG00000239264.8|mRNA|TXNDC5|ENSG00000239264.8|ENSG00000239264.8|0|4387	37	239.919
ENSG00000231925.11|mRNA|TAPBP|ENSG00000231925.11|ENSG00000231925.11|0|5056	37	254.081
ENSG00000115415.18|mRNA|STAT1|ENSG00000115415.18|ENSG00000115415.18|0|6053	37	255.297
hsa_circ_0001819|circRNA|hsa_circ_0001819|hsa_circ_0001819|hsa_circ_0001819|0|600	37	255.459
ENSG00000116954.7|mRNA|RRAGC|ENSG00000116954.7|ENSG00000116954.7|0|5167	36	168.389
hsa_circ_0023916|circRNA|hsa_circ_0023916|hsa_circ_0023916|hsa_circ_0023916|0|600	36	199.194
ENSG00000196628.15|mRNA|TCF4|ENSG00000196628.15|ENSG00000196628.15|0|27828	36	200.5
ENSG00000125730.16|mRNA|C3|ENSG00000125730.16|ENSG00000125730.16|0|8328	36	223.694
ENSG00000137411.16|mRNA|VARS2|ENSG00000137411.16|ENSG00000137411.16|0|8448	36	229.528
ENSG00000177106.14|mRNA|EPS8L2|ENSG00000177106.14|ENSG00000177106.14|0|5693	36	231.917
ENSG00000281000.1|snoRNA|SNORD3D|ENSG00000281000.1|ENSG00000281000.1|0|217	36	259.194
hsa_circ_0084159|circRNA|hsa_circ_0084159|hsa_circ_0084159|hsa_circ_0084159|0|600	36	270.25
ENSG00000155657.26|mRNA|TTN|ENSG00000155657.26|ENSG00000155657.26|0|118976	35	138.2
ENSG00000237850.7|pseudogene|AC091304.1|ENSG00000237850.7|ENSG00000237850.7|0|3100	35	155.943
ENSG00000166794.4|mRNA|PPIB|ENSG00000166794.4|ENSG00000166794.4|0|1911	35	158.714
ENSG00000120733.13|mRNA|KDM3B|ENSG00000120733.13|ENSG00000120733.13|0|7961	35	223.943
hsa_circ_0003459|circRNA|hsa_circ_0003459|hsa_circ_0003459|hsa_circ_0003459|0|600	35	228.457
ENSG00000206573.8|lncRNA|THUMPD3-AS1|ENSG00000206573.8|ENSG00000206573.8|0|6275	35	229.086
ENSG00000271320.1|lncRNA|AC091488.1|ENSG00000271320.1|ENSG00000271320.1|0|660	35	260.829
hsa_circ_0008952|circRNA|hsa_circ_0008952|hsa_circ_0008952|hsa_circ_0008952|0|600	35	265.6
ENSG00000213337.8|mRNA|ANKRD39|ENSG00000213337.8|ENSG00000213337.8|0|5330	34	175.235
ENSG00000214135.8|pseudogene|AC132008.2|ENSG00000214135.8|ENSG00000214135.8|0|3502	34	216.294
hsa_circ_0042519|circRNA|hsa_circ_0042519|hsa_circ_0042519|hsa_circ_0042519|0|600	34	218.265
ENSG00000151914.19|mRNA|DST|ENSG00000151914.19|ENSG00000151914.19|0|42341	34	223.765
ENSG00000183495.13|mRNA|EP400|ENSG00000183495.13|ENSG00000183495.13|0|18705	34	224.324
ENSG00000173540.12|mRNA|GMPPB|ENSG00000173540.12|ENSG00000173540.12|0|6742	34	229.941
ENSG00000145780.7|mRNA|FEM1C|ENSG00000145780.7|ENSG00000145780.7|0|5816	34	234.559
hsa_circ_0076373|circRNA|hsa_circ_0076373|hsa_circ_0076373|hsa_circ_0076373|0|600	34	259.647
ENSG00000126709.14|mRNA|IFI6|ENSG00000126709.14|ENSG00000126709.14|0|865	34	263.912
hsa_circ_0005051|circRNA|hsa_circ_0005051|hsa_circ_0005051|hsa_circ_0005051|0|358	34	277.882
hsa_circ_0068175|circRNA|hsa_circ_0068175|hsa_circ_0068175|hsa_circ_0068175|0|600	34	281.529
ENSG00000149428.18|mRNA|HYOU1|ENSG00000149428.18|ENSG00000149428.18|0|7694	33	94.0303
ENSG00000139370.11|mRNA|SLC15A4|ENSG00000139370.11|ENSG00000139370.11|0|5496	33	139.121
ENSG00000155367.15|mRNA|PPM1J|ENSG00000155367.15|ENSG00000155367.15|0|2874	33	177.697
ENSG00000132967.9|pseudogene|HMGB1P5|ENSG00000132967.9|ENSG00000132967.9|0|1111	33	189.212
ENSG00000213240.8|mRNA|AC239799.1|ENSG00000213240.8|ENSG00000213240.8|0|3411	33	193.03
ENSG00000104972.15|mRNA|LILRB1|ENSG00000104972.15|ENSG00000104972.15|0|5008	33	198.879
ENSG00000244257.5|pseudogene|PKD1P1|ENSG00000244257.5|ENSG00000244257.5|0|6805	33	200.576
ENSG00000124813.20|mRNA|RUNX2|ENSG00000124813.20|ENSG00000124813.20|0|8192	33	209.121
ENSG00000215790.6|mRNA|SLC35E2|ENSG00000215790.6|ENSG00000215790.6|0|3264	33	209.879
ENSG00000205746.9|pseudogene|AC126755.1|ENSG00000205746.9|ENSG00000205746.9|0|6804	33	222.758
hsa_circ_0004098|circRNA|hsa_circ_0004098|hsa_circ_0004098|hsa_circ_0004098|0|578	33	226.394
ENSG00000155966.13|mRNA|AFF2|ENSG00000155966.13|ENSG00000155966.13|0|14006	33	239.242
ENSG00000132510.10|mRNA|KDM6B|ENSG00000132510.10|ENSG00000132510.10|0|7258	33	245.03
ENSG00000215837.7|pseudogene|SDHAP2|ENSG00000215837.7|ENSG00000215837.7|0|2001	33	251.697
ENSG00000241525.4|lncRNA|AC141424.1|ENSG00000241525.4|ENSG00000241525.4|0|1323	33	285.121
hsa_circ_0081751|circRNA|hsa_circ_0081751|hsa_circ_0081751|hsa_circ_0081751|0|600	33	286.121
ENSG00000065970.8|mRNA|FOXJ2|ENSG00000065970.8|ENSG00000065970.8|0|6296	33	295.848
hsa_circ_0007660|circRNA|hsa_circ_0007660|hsa_circ_0007660|hsa_circ_0007660|0|600	32	188.531
ENSG00000185344.13|mRNA|ATP6V0A2|ENSG00000185344.13|ENSG00000185344.13|0|13729	32	234.719
ENSG00000158604.14|mRNA|TMED4|ENSG00000158604.14|ENSG00000158604.14|0|3769	32	235.594
ENSG00000278771.1|srpRNA|RN7SL3|ENSG00000278771.1|ENSG00000278771.1|0|299	32	237.844
hsa_circ_0008698|circRNA|hsa_circ_0008698|hsa_circ_0008698|hsa_circ_0008698|0|538	32	240.281
ENSG00000240247.7|mRNA|DEFA1B|ENSG00000240247.7|ENSG00000240247.7|0|491	32	244.688
ENSG00000144283.21|mRNA|PKP4|ENSG00000144283.21|ENSG00000144283.21|0|9525	32	255.562
hsa_circ_0030585|circRNA|hsa_circ_0030585|hsa_circ_0030585|hsa_circ_0030585|0|600	32	263.281
ENSG00000239775.1|lncRNA|AC017116.1|ENSG00000239775.1|ENSG00000239775.1|0|708	32	272.25
ENSG00000100767.15|mRNA|PAPLN|ENSG00000100767.15|ENSG00000100767.15|0|7699	31	136.71
ENSG00000102921.7|mRNA|N4BP1|ENSG00000102921.7|ENSG00000102921.7|0|7839	31	154.613
ENSG00000221978.11|mRNA|CCNL2|ENSG00000221978.11|ENSG00000221978.11|0|6850	31	158.194
ENSG00000272578.5|pseudogene|AP000347.1|ENSG00000272578.5|ENSG00000272578.5|0|7012	31	160.161
hsa_circ_0068651|circRNA|hsa_circ_0068651|hsa_circ_0068651|hsa_circ_0068651|0|600	31	198.258
ENSG00000093010.13|mRNA|COMT|ENSG00000093010.13|ENSG00000093010.13|0|5195	31	212.097
hsa_circ_0000825|circRNA|hsa_circ_0000825|hsa_circ_0000825|hsa_circ_0000825|0|600	31	215.452
ENSG00000260565.6|lncRNA|ERVK13-1|ENSG00000260565.6|ENSG00000260565.6|0|8966	31	227.645
ENSG00000107341.4|mRNA|UBE2R2|ENSG00000107341.4|ENSG00000107341.4|0|4075	31	237.452
ENSG00000019582.14|mRNA|CD74|ENSG00000019582.14|ENSG00000019582.14|0|3184	31	240.226
ENSG00000248275.1|lncRNA|TRIM52-AS1|ENSG00000248275.1|ENSG00000248275.1|0|1316	31	242.355
ENSG00000072736.18|mRNA|NFATC3|ENSG00000072736.18|ENSG00000072736.18|0|8806	31	253.323
ENSG00000174450.11|mRNA|GOLGA6L2|ENSG00000174450.11|ENSG00000174450.11|0|3030	31	255.871
ENSG00000239732.3|mRNA|TLR9|ENSG00000239732.3|ENSG00000239732.3|0|3870	31	264.806
ENSG00000178809.11|mRNA|TRIM73|ENSG00000178809.11|ENSG00000178809.11|0|5544	31	283.258
hsa_circ_0001824|circRNA|hsa_circ_0001824|hsa_circ_0001824|hsa_circ_0001824|0|600	31	289.613
ENSG00000123728.9|mRNA|RAP2C|ENSG00000123728.9|ENSG00000123728.9|0|4118	30	143.2
hsa_circ_0028980|circRNA|hsa_circ_0028980|hsa_circ_0028980|hsa_circ_0028980|0|600	30	218.067
ENSG00000204301.6|mRNA|NOTCH4|ENSG00000204301.6|ENSG00000204301.6|0|9748	30	234.067
ENSG00000071054.16|mRNA|MAP4K4|ENSG00000071054.16|ENSG00000071054.16|0|11961	30	276.267
ENSG00000249624.8|mRNA|AP000295.1|ENSG00000249624.8|ENSG00000249624.8|0|1000	30	287.867
ENSG00000132383.11|mRNA|RPA1|ENSG00000132383.11|ENSG00000132383.11|0|5492	30	302.767
ENSG00000258186.2|pseudogene|SLC7A5P2|ENSG00000258186.2|ENSG00000258186.2|0|536	30	353.9
ENSG00000075826.16|mRNA|SEC31B|ENSG00000075826.16|ENSG00000075826.16|0|7938	29	146.793
hsa_circ_0042867|circRNA|hsa_circ_0042867|hsa_circ_0042867|hsa_circ_0042867|0|418	29	171.241
ENSG00000186704.9|pseudogene|DTX2P1|ENSG00000186704.9|ENSG00000186704.9|0|1633	29	175.103
ENSG00000197136.4|mRNA|PCNX3|ENSG00000197136.4|ENSG00000197136.4|0|7972	29	194
ENSG00000154124.4|mRNA|OTULIN|ENSG00000154124.4|ENSG00000154124.4|0|8614	29	216.552
ENSG00000074603.18|mRNA|DPP8|ENSG00000074603.18|ENSG00000074603.18|0|10211	29	217.759
ENSG00000163126.14|mRNA|ANKRD23|ENSG00000163126.14|ENSG00000163126.14|0|4116	29	218.069
ENSG00000108604.15|mRNA|SMARCD2|ENSG00000108604.15|ENSG00000108604.15|0|3734	29	237.759
hsa_circ_0007807|circRNA|hsa_circ_0007807|hsa_circ_0007807|hsa_circ_0007807|0|600	29	241.448
ENSG00000172071.11|mRNA|EIF2AK3|ENSG00000172071.11|ENSG00000172071.11|0|5434	29	249.724
ENSG00000185591.9|mRNA|SP1|ENSG00000185591.9|ENSG00000185591.9|0|8083	29	254.828
ENSG00000204946.9|mRNA|ZNF783|ENSG00000204946.9|ENSG00000204946.9|0|6726	29	264.207
hsa_circ_0080414|circRNA|hsa_circ_0080414|hsa_circ_0080414|hsa_circ_0080414|0|426	29	267.31
ENSG00000263956.6|mRNA|NBPF11|ENSG00000263956.6|ENSG00000263956.6|0|5947	29	267.897
ENSG00000151414.14|mRNA|NEK7|ENSG00000151414.14|ENSG00000151414.14|0|5485	29	270.379
hsa_circ_0056668|circRNA|hsa_circ_0056668|hsa_circ_0056668|hsa_circ_0056668|0|600	29	275.345
ENSG00000244038.9|mRNA|DDOST|ENSG00000244038.9|ENSG00000244038.9|0|2721	29	293.345
ENSG00000115232.13|mRNA|ITGA4|ENSG00000115232.13|ENSG00000115232.13|0|7901	29	336.897
hsa_circ_0004759|circRNA|hsa_circ_0004759|hsa_circ_0004759|hsa_circ_0004759|0|600	28	107.071
ENSG00000147162.13|mRNA|OGT|ENSG00000147162.13|ENSG00000147162.13|0|9812	28	187.929
ENSG00000174456.13|mRNA|C12orf76|ENSG00000174456.13|ENSG00000174456.13|0|7052	28	197.964
hsa_circ_0091360|circRNA|hsa_circ_0091360|hsa_circ_0091360|hsa_circ_0091360|0|600	28	220.143
ENSG00000140948.11|mRNA|ZCCHC14|ENSG00000140948.11|ENSG00000140948.11|0|7390	28	225.679
ENSG00000071859.14|mRNA|FAM50A|ENSG00000071859.14|ENSG00000071859.14|0|2567	28	234.143
hsa_circ_0059425|circRNA|hsa_circ_0059425|hsa_circ_0059425|hsa_circ_0059425|0|570	28	234.179
ENSG00000108984.13|mRNA|MAP2K6|ENSG00000108984.13|ENSG00000108984.13|0|6125	28	236.071
ENSG00000113638.13|mRNA|TTC33|ENSG00000113638.13|ENSG00000113638.13|0|6821	28	239.143
ENSG00000134602.15|mRNA|STK26|ENSG00000134602.15|ENSG00000134602.15|0|3354	28	252.464
ENSG00000125107.17|mRNA|CNOT1|ENSG00000125107.17|ENSG00000125107.17|0|10852	28	262.464
ENSG00000163349.21|mRNA|HIPK1|ENSG00000163349.21|ENSG00000163349.21|0|9280	28	263.25
ENSG00000257379.1|lncRNA|AC023509.1|ENSG00000257379.1|ENSG00000257379.1|0|1571	28	265.536
ENSG00000160712.12|mRNA|IL6R|ENSG00000160712.12|ENSG00000160712.12|0|6453	28	268.107
hsa_circ_0008031|circRNA|hsa_circ_0008031|hsa_circ_0008031|hsa_circ_0008031|0|600	28	276.179
hsa_circ_0008800|circRNA|hsa_circ_0008800|hsa_circ_0008800|hsa_circ_0008800|0|600	28	277.5
ENSG00000250264.1|mRNA|AL669918.1|ENSG00000250264.1|ENSG00000250264.1|0|2705	28	321.393
ENSG00000136052.9|mRNA|SLC41A2|ENSG00000136052.9|ENSG00000136052.9|0|5151	27	167.593
ENSG00000186174.12|mRNA|BCL9L|ENSG00000186174.12|ENSG00000186174.12|0|10470	27	170.481
ENSG00000198692.9|mRNA|EIF1AY|ENSG00000198692.9|ENSG00000198692.9|0|4074	27	171.185
hsa_circ_0068926|circRNA|hsa_circ_0068926|hsa_circ_0068926|hsa_circ_0068926|0|600	27	175.889
ENSG00000121281.12|mRNA|ADCY7|ENSG00000121281.12|ENSG00000121281.12|0|8630	27	193.074
ENSG00000168781.21|mRNA|PPIP5K1|ENSG00000168781.21|ENSG00000168781.21|0|8075	27	201.852
hsa_circ_0062688|circRNA|hsa_circ_0062688|hsa_circ_0062688|hsa_circ_0062688|0|600	27	221.889
hsa_circ_0081343|circRNA|hsa_circ_0081343|hsa_circ_0081343|hsa_circ_0081343|0|446	27	225.704
ENSG00000204219.9|mRNA|TCEA3|ENSG00000204219.9|ENSG00000204219.9|0|3515	27	227.185
ENSG00000101160.13|mRNA|CTSZ|ENSG00000101160.13|ENSG00000101160.13|0|2038	27	235.333
hsa_circ_0085465|circRNA|hsa_circ_0085465|hsa_circ_0085465|hsa_circ_0085465|0|600	27	240
ENSG00000229604.2|pseudogene|MTATP8P2|ENSG00000229604.2|ENSG00000229604.2|0|202	27	241.889
ENSG00000257621.7|lncRNA|PSMA3-AS1|ENSG00000257621.7|ENSG00000257621.7|0|7409	27	244.63
ENSG00000186818.12|mRNA|LILRB4|ENSG00000186818.12|ENSG00000186818.12|0|6328	27	252.519
ENSG00000138688.15|mRNA|KIAA1109|ENSG00000138688.15|ENSG00000138688.15|0|20470	27	254.37
ENSG00000087263.16|mRNA|OGFOD1|ENSG00000087263.16|ENSG00000087263.16|0|5806	27	257.037
hsa_circ_0067620|circRNA|hsa_circ_0067620|hsa_circ_0067620|hsa_circ_0067620|0|600	27	259.593
ENSG00000207142.1|Y_RNA|Y_RNA|ENSG00000207142.1|ENSG00000207142.1|0|102	27	260.556
ENSG00000252612.1|Y_RNA|Y_RNA|ENSG00000252612.1|ENSG00000252612.1|0|93	27	277.926
hsa_circ_0089237|circRNA|hsa_circ_0089237|hsa_circ_0089237|hsa_circ_0089237|0|600	27	288.889
hsa_circ_0005321|circRNA|hsa_circ_0005321|hsa_circ_0005321|hsa_circ_0005321|0|600	27	291.741
hsa_circ_0002613|circRNA|hsa_circ_0002613|hsa_circ_0002613|hsa_circ_0002613|0|534	27	291.741
ENSG00000196313.11|mRNA|POM121|ENSG00000196313.11|ENSG00000196313.11|0|9822	27	294.222
ENSG00000110077.14|mRNA|MS4A6A|ENSG00000110077.14|ENSG00000110077.14|0|5791	27	305.963
ENSG00000171365.15|mRNA|CLCN5|ENSG00000171365.15|ENSG00000171365.15|0|10619	26	99.0769
ENSG00000108175.16|mRNA|ZMIZ1|ENSG00000108175.16|ENSG00000108175.16|0|11048	26	194.577
ENSG00000100288.19|mRNA|CHKB|ENSG00000100288.19|ENSG00000100288.19|0|3021	26	205.538
hsa_circ_0068174|circRNA|hsa_circ_0068174|hsa_circ_0068174|hsa_circ_0068174|0|600	26	205.538
hsa_circ_0006709|circRNA|hsa_circ_0006709|hsa_circ_0006709|hsa_circ_0006709|0|600	26	212.769
ENSG00000114480.12|mRNA|GBE1|ENSG00000114480.12|ENSG00000114480.12|0|5171	26	213.846
ENSG00000169857.7|mRNA|AVEN|ENSG00000169857.7|ENSG00000169857.7|0|1808	26	218.962
hsa_circ_0007907|circRNA|hsa_circ_0007907|hsa_circ_0007907|hsa_circ_0007907|0|600	26	227.269
hsa_circ_0033474|circRNA|hsa_circ_0033474|hsa_circ_0033474|hsa_circ_0033474|0|600	26	237
ENSG00000099725.14|pseudogene|PRKY|ENSG00000099725.14|ENSG00000099725.14|0|7674	26	247.846
ENSG00000123384.13|mRNA|LRP1|ENSG00000123384.13|ENSG00000123384.13|0|20839	26	254.192
ENSG00000133169.5|mRNA|BEX1|ENSG00000133169.5|ENSG00000133169.5|0|864	26	273.923
ENSG00000162402.13|mRNA|USP24|ENSG00000162402.13|ENSG00000162402.13|0|11772	26	281.423
hsa_circ_0001801|circRNA|hsa_circ_0001801|hsa_circ_0001801|hsa_circ_0001801|0|600	26	292.885
ENSG00000143319.16|mRNA|ISG20L2|ENSG00000143319.16|ENSG00000143319.16|0|5262	26	293.577
ENSG00000255823.4|mRNA|MTRNR2L8|ENSG00000255823.4|ENSG00000255823.4|0|1303	26	310.769
ENSG00000047457.13|mRNA|CP|ENSG00000047457.13|ENSG00000047457.13|0|7296	25	140.24
ENSG00000153898.12|mRNA|MCOLN2|ENSG00000153898.12|ENSG00000153898.12|0|3442	25	167.24
ENSG00000196323.12|mRNA|ZBTB44|ENSG00000196323.12|ENSG00000196323.12|0|10801	25	205.76
ENSG00000273000.5|lncRNA|AP000347.2|ENSG00000273000.5|ENSG00000273000.5|0|3126	25	209.52
ENSG00000151726.13|mRNA|ACSL1|ENSG00000151726.13|ENSG00000151726.13|0|6284	25	215.16
ENSG00000125249.6|mRNA|RAP2A|ENSG00000125249.6|ENSG00000125249.6|0|5570	25	216.12
ENSG00000076984.17|mRNA|MAP2K7|ENSG00000076984.17|ENSG00000076984.17|0|5145	25	219.72
ENSG00000254995.4|mRNA|STX16-NPEPL1|ENSG00000254995.4|ENSG00000254995.4|0|3859	25	226.56
ENSG00000132155.11|mRNA|RAF1|ENSG00000132155.11|ENSG00000132155.11|0|7847	25	228.84
ENSG00000056097.15|mRNA|ZFR|ENSG00000056097.15|ENSG00000056097.15|0|6792	25	236.04
ENSG00000163960.11|mRNA|UBXN7|ENSG00000163960.11|ENSG00000163960.11|0|11291	25	236.08
ENSG00000168502.17|mRNA|MTCL1|ENSG00000168502.17|ENSG00000168502.17|0|12665	25	236.8
hsa_circ_0000647|circRNA|hsa_circ_0000647|hsa_circ_0000647|hsa_circ_0000647|0|600	25	242.48
hsa_circ_0014528|circRNA|hsa_circ_0014528|hsa_circ_0014528|hsa_circ_0014528|0|524	25	246.68
ENSG00000204564.11|mRNA|C6orf136|ENSG00000204564.11|ENSG00000204564.11|0|2118	25	246.92
ENSG00000129128.12|mRNA|SPCS3|ENSG00000129128.12|ENSG00000129128.12|0|6831	25	253.68
hsa_circ_0005739|circRNA|hsa_circ_0005739|hsa_circ_0005739|hsa_circ_0005739|0|600	25	256.52
ENSG00000144589.21|mRNA|STK11IP|ENSG00000144589.21|ENSG00000144589.21|0|5694	25	262.12
hsa_circ_0040370|circRNA|hsa_circ_0040370|hsa_circ_0040370|hsa_circ_0040370|0|538	25	269.48
ENSG00000101577.9|mRNA|LPIN2|ENSG00000101577.9|ENSG00000101577.9|0|6800	25	271.28
ENSG00000055917.15|mRNA|PUM2|ENSG00000055917.15|ENSG00000055917.15|0|6978	25	273.52
ENSG00000203710.10|mRNA|CR1|ENSG00000203710.10|ENSG00000203710.10|0|11465	25	279.28
ENSG00000143546.9|mRNA|S100A8|ENSG00000143546.9|ENSG00000143546.9|0|1006	25	300.04
ENSG00000198496.10|pseudogene|NBR2|ENSG00000198496.10|ENSG00000198496.10|0|2096	25	317.88
ENSG00000157350.12|mRNA|ST3GAL2|ENSG00000157350.12|ENSG00000157350.12|0|9744	24	164.417
ENSG00000160691.18|mRNA|SHC1|ENSG00000160691.18|ENSG00000160691.18|0|4342	24	178.833
ENSG00000085449.14|mRNA|WDFY1|ENSG00000085449.14|ENSG00000085449.14|0|5516	24	183.708
ENSG00000170266.15|mRNA|GLB1|ENSG00000170266.15|ENSG00000170266.15|0|4364	24	185.542
ENSG00000143870.12|mRNA|PDIA6|ENSG00000143870.12|ENSG00000143870.12|0|4101	24	203.042
ENSG00000148218.15|mRNA|ALAD|ENSG00000148218.15|ENSG00000148218.15|0|4983	24	222.833
ENSG00000079313.13|mRNA|REXO1|ENSG00000079313.13|ENSG00000079313.13|0|5199	24	225.625
hsa_circ_0083218|circRNA|hsa_circ_0083218|hsa_circ_0083218|hsa_circ_0083218|0|600	24	226.458
hsa_circ_0021274|circRNA|hsa_circ_0021274|hsa_circ_0021274|hsa_circ_0021274|0|600	24	234.583
ENSG00000115307.16|mRNA|AUP1|ENSG00000115307.16|ENSG00000115307.16|0|2634	24	244.458
ENSG00000196616.13|mRNA|ADH1B|ENSG00000196616.13|ENSG00000196616.13|0|10777	24	245.417
hsa_circ_0000142|circRNA|hsa_circ_0000142|hsa_circ_0000142|hsa_circ_0000142|0|430	24	248.375
ENSG00000070756.15|mRNA|PABPC1|ENSG00000070756.15|ENSG00000070756.15|0|4752	24	249.833
ENSG00000122952.16|mRNA|ZWINT|ENSG00000122952.16|ENSG00000122952.16|0|2378	24	254.75
ENSG00000163660.11|mRNA|CCNL1|ENSG00000163660.11|ENSG00000163660.11|0|8729	24	264.208
ENSG00000141568.20|mRNA|FOXK2|ENSG00000141568.20|ENSG00000141568.20|0|9991	24	265.917
ENSG00000174353.17|pseudogene|STAG3L3|ENSG00000174353.17|ENSG00000174353.17|0|3644	24	267.083
hsa_circ_0004817|circRNA|hsa_circ_0004817|hsa_circ_0004817|hsa_circ_0004817|0|472	24	271.083
hsa_circ_0021570|circRNA|hsa_circ_0021570|hsa_circ_0021570|hsa_circ_0021570|0|600	24	274.208
ENSG00000170027.6|mRNA|YWHAG|ENSG00000170027.6|ENSG00000170027.6|0|3750	24	277.708
ENSG00000233448.2|pseudogene|PMS2P9|ENSG00000233448.2|ENSG00000233448.2|0|515	24	289.958
hsa_circ_0068457|circRNA|hsa_circ_0068457|hsa_circ_0068457|hsa_circ_0068457|0|266	24	293.167
ENSG00000111737.11|mRNA|RAB35|ENSG00000111737.11|ENSG00000111737.11|0|4022	24	295.333
ENSG00000107854.5|mRNA|TNKS2|ENSG00000107854.5|ENSG00000107854.5|0|6157	24	295.458
hsa_circ_0020509|circRNA|hsa_circ_0020509|hsa_circ_0020509|hsa_circ_0020509|0|372	24	321.25
ENSG00000123352.17|mRNA|SPATS2|ENSG00000123352.17|ENSG00000123352.17|0|6840	23	149.478
ENSG00000154928.16|mRNA|EPHB1|ENSG00000154928.16|ENSG00000154928.16|0|6956	23	164.261
ENSG00000134910.12|mRNA|STT3A|ENSG00000134910.12|ENSG00000134910.12|0|7345	23	211.087
ENSG00000105835.11|mRNA|NAMPT|ENSG00000105835.11|ENSG00000105835.11|0|9049	23	215.957
ENSG00000139278.9|mRNA|GLIPR1|ENSG00000139278.9|ENSG00000139278.9|0|6273	23	224.087
hsa_circ_0006382|circRNA|hsa_circ_0006382|hsa_circ_0006382|hsa_circ_0006382|0|600	23	225.826
hsa_circ_0007195|circRNA|hsa_circ_0007195|hsa_circ_0007195|hsa_circ_0007195|0|444	23	243.391
ENSG00000226375.1|lncRNA|AL022310.1|ENSG00000226375.1|ENSG00000226375.1|0|690	23	246.696
ENSG00000106780.8|mRNA|MEGF9|ENSG00000106780.8|ENSG00000106780.8|0|6298	23	248.652
ENSG00000197111.15|mRNA|PCBP2|ENSG00000197111.15|ENSG00000197111.15|0|7926	23	260.87
ENSG00000271601.3|mRNA|LIX1L|ENSG00000271601.3|ENSG00000271601.3|0|3975	23	261.435
ENSG00000273897.1|pseudogene|AC211476.3|ENSG00000273897.1|ENSG00000273897.1|0|715	23	265.913
ENSG00000201421.1|Y_RNA|Y_RNA|ENSG00000201421.1|ENSG00000201421.1|0|99	23	267.304
ENSG00000198198.15|mRNA|SZT2|ENSG00000198198.15|ENSG00000198198.15|0|25040	23	267.913
hsa_circ_0002162|circRNA|hsa_circ_0002162|hsa_circ_0002162|hsa_circ_0002162|0|462	23	271.087
ENSG00000196712.17|mRNA|NF1|ENSG00000196712.17|ENSG00000196712.17|0|27130	23	276.826
hsa_circ_0006031|circRNA|hsa_circ_0006031|hsa_circ_0006031|hsa_circ_0006031|0|548	23	280.609
ENSG00000157216.15|mRNA|SSBP3|ENSG00000157216.15|ENSG00000157216.15|0|5227	23	284.87
ENSG00000277322.1|mRNA|GOLGA6L6|ENSG00000277322.1|ENSG00000277322.1|0|4013	23	285.435
ENSG00000168785.7|mRNA|TSPAN5|ENSG00000168785.7|ENSG00000168785.7|0|7430	23	297.087
hsa_circ_0059074|circRNA|hsa_circ_0059074|hsa_circ_0059074|hsa_circ_0059074|0|584	23	311.957
ENSG00000010295.19|mRNA|IFFO1|ENSG00000010295.19|ENSG00000010295.19|0|5203	23	312.087
ENSG00000243554.1|pseudogene|AC004967.1|ENSG00000243554.1|ENSG00000243554.1|0|447	23	315.13
hsa_circ_0087621|circRNA|hsa_circ_0087621|hsa_circ_0087621|hsa_circ_0087621|0|418	23	333.087
ENSG00000182841.12|pseudogene|RRP7BP|ENSG00000182841.12|ENSG00000182841.12|0|5092	22	148.318
hsa_circ_0006790|circRNA|hsa_circ_0006790|hsa_circ_0006790|hsa_circ_0006790|0|450	22	179.682
ENSG00000186063.12|mRNA|AIDA|ENSG00000186063.12|ENSG00000186063.12|0|4232	22	192
ENSG00000145016.15|mRNA|RUBCN|ENSG00000145016.15|ENSG00000145016.15|0|8613	22	203.636
ENSG00000186951.16|mRNA|PPARA|ENSG00000186951.16|ENSG00000186951.16|0|13219	22	216.273
hsa_circ_0008693|circRNA|hsa_circ_0008693|hsa_circ_0008693|hsa_circ_0008693|0|600	22	221.364
ENSG00000160285.14|mRNA|LSS|ENSG00000160285.14|ENSG00000160285.14|0|7238	22	223.455
ENSG00000188554.13|mRNA|NBR1|ENSG00000188554.13|ENSG00000188554.13|0|8405	22	224
hsa_circ_0001492|circRNA|hsa_circ_0001492|hsa_circ_0001492|hsa_circ_0001492|0|600	22	226.091
ENSG00000099250.17|mRNA|NRP1|ENSG00000099250.17|ENSG00000099250.17|0|11522	22	226.364
hsa_circ_0073048|circRNA|hsa_circ_0073048|hsa_circ_0073048|hsa_circ_0073048|0|360	22	239.136
hsa_circ_0068135|circRNA|hsa_circ_0068135|hsa_circ_0068135|hsa_circ_0068135|0|600	22	240.182
ENSG00000124782.19|mRNA|RREB1|ENSG00000124782.19|ENSG00000124782.19|0|17254	22	243.955
ENSG00000204116.11|mRNA|CHIC1|ENSG00000204116.11|ENSG00000204116.11|0|6939	22	254.045
ENSG00000090060.17|mRNA|PAPOLA|ENSG00000090060.17|ENSG00000090060.17|0|12766	22	254.636
ENSG00000120129.5|mRNA|DUSP1|ENSG00000120129.5|ENSG00000120129.5|0|2019	22	258.682
ENSG00000173821.19|mRNA|RNF213|ENSG00000173821.19|ENSG00000173821.19|0|28570	22	263.773
ENSG00000125447.16|mRNA|GGA3|ENSG00000125447.16|ENSG00000125447.16|0|6640	22	263.955
hsa_circ_0073611|circRNA|hsa_circ_0073611|hsa_circ_0073611|hsa_circ_0073611|0|600	22	270.136
hsa_circ_0000344|circRNA|hsa_circ_0000344|hsa_circ_0000344|hsa_circ_0000344|0|600	22	276.909
ENSG00000116991.10|mRNA|SIPA1L2|ENSG00000116991.10|ENSG00000116991.10|0|7641	22	277.818
ENSG00000264204.2|pseudogene|AGAP7P|ENSG00000264204.2|ENSG00000264204.2|0|2062	22	286.909
ENSG00000169967.16|mRNA|MAP3K2|ENSG00000169967.16|ENSG00000169967.16|0|11508	22	288.591
hsa_circ_0035051|circRNA|hsa_circ_0035051|hsa_circ_0035051|hsa_circ_0035051|0|600	22	293.682
ENSG00000283674.2|lncRNA|AC068587.6|ENSG00000283674.2|ENSG00000283674.2|0|13920	22	312.955
ENSG00000076108.11|mRNA|BAZ2A|ENSG00000076108.11|ENSG00000076108.11|0|10918	22	317.955
ENSG00000261064.1|lncRNA|LINC02256|ENSG00000261064.1|ENSG00000261064.1|0|909	22	335.455
ENSG00000066827.15|mRNA|ZFAT|ENSG00000066827.15|ENSG00000066827.15|0|8900	21	99.2381
ENSG00000141540.10|mRNA|TTYH2|ENSG00000141540.10|ENSG00000141540.10|0|5375	21	124.19
ENSG00000154305.16|mRNA|MIA3|ENSG00000154305.16|ENSG00000154305.16|0|10171	21	163.095
ENSG00000090520.11|mRNA|DNAJB11|ENSG00000090520.11|ENSG00000090520.11|0|5731	21	163.238
ENSG00000054219.10|mRNA|LY75|ENSG00000054219.10|ENSG00000054219.10|0|8798	21	168.238
ENSG00000213246.6|mRNA|SUPT4H1|ENSG00000213246.6|ENSG00000213246.6|0|2079	21	174.381
ENSG00000198874.12|mRNA|TYW1|ENSG00000198874.12|ENSG00000198874.12|0|3890	21	206.619
hsa_circ_0070030|circRNA|hsa_circ_0070030|hsa_circ_0070030|hsa_circ_0070030|0|600	21	207.571
ENSG00000067646.11|mRNA|ZFY|ENSG00000067646.11|ENSG00000067646.11|0|5527	21	210.667
ENSG00000180096.11|mRNA|SEPT1|ENSG00000180096.11|ENSG00000180096.11|0|4217	21	214.952
ENSG00000157540.19|mRNA|DYRK1A|ENSG00000157540.19|ENSG00000157540.19|0|10213	21	215.381
ENSG00000183878.15|mRNA|UTY|ENSG00000183878.15|ENSG00000183878.15|0|9191	21	221.714
ENSG00000107331.16|mRNA|ABCA2|ENSG00000107331.16|ENSG00000107331.16|0|11514	21	232.381
ENSG00000186298.11|mRNA|PPP1CC|ENSG00000186298.11|ENSG00000186298.11|0|6906	21	240.952
ENSG00000254206.5|mRNA|NPIPB11|ENSG00000254206.5|ENSG00000254206.5|0|4398	21	243.762
ENSG00000152763.16|mRNA|WDR78|ENSG00000152763.16|ENSG00000152763.16|0|6704	21	245.667
hsa_circ_0004834|circRNA|hsa_circ_0004834|hsa_circ_0004834|hsa_circ_0004834|0|492	21	246.048
hsa_circ_0053916|circRNA|hsa_circ_0053916|hsa_circ_0053916|hsa_circ_0053916|0|582	21	251.571
ENSG00000259040.5|mRNA|BLOC1S5-TXNDC5|ENSG00000259040.5|ENSG00000259040.5|0|3030	21	253.762
ENSG00000126003.6|mRNA|PLAGL2|ENSG00000126003.6|ENSG00000126003.6|0|5705	21	254.286
ENSG00000182087.12|mRNA|TMEM259|ENSG00000182087.12|ENSG00000182087.12|0|4031	21	258.762
ENSG00000165121.11|pseudogene|AL353743.1|ENSG00000165121.11|ENSG00000165121.11|0|2067	21	261.429
hsa_circ_0066184|circRNA|hsa_circ_0066184|hsa_circ_0066184|hsa_circ_0066184|0|600	21	265.381
ENSG00000012061.15|mRNA|ERCC1|ENSG00000012061.15|ENSG00000012061.15|0|5576	21	265.857
ENSG00000162408.10|mRNA|NOL9|ENSG00000162408.10|ENSG00000162408.10|0|7293	21	267.238
hsa_circ_0002490|circRNA|hsa_circ_0002490|hsa_circ_0002490|hsa_circ_0002490|0|536	21	267.333
hsa_circ_0005806|circRNA|hsa_circ_0005806|hsa_circ_0005806|hsa_circ_0005806|0|600	21	270
ENSG00000164989.16|mRNA|CCDC171|ENSG00000164989.16|ENSG00000164989.16|0|12153	21	271.571
ENSG00000185596.16|pseudogene|WASH3P|ENSG00000185596.16|ENSG00000185596.16|0|2351	21	273.048
hsa_circ_0001663|circRNA|hsa_circ_0001663|hsa_circ_0001663|hsa_circ_0001663|0|600	21	273.095
ENSG00000179218.13|mRNA|CALR|ENSG00000179218.13|ENSG00000179218.13|0|2714	21	278.143
hsa_circ_0032062|circRNA|hsa_circ_0032062|hsa_circ_0032062|hsa_circ_0032062|0|380	21	280.857
hsa_circ_0086088|circRNA|hsa_circ_0086088|hsa_circ_0086088|hsa_circ_0086088|0|182	21	289.667
ENSG00000126216.13|mRNA|TUBGCP3|ENSG00000126216.13|ENSG00000126216.13|0|7014	21	301.286
ENSG00000274012.1|srpRNA|RN7SL2|ENSG00000274012.1|ENSG00000274012.1|0|300	21	302
ENSG00000138166.5|mRNA|DUSP5|ENSG00000138166.5|ENSG00000138166.5|0|2615	21	307.048
ENSG00000183087.14|mRNA|GAS6|ENSG00000183087.14|ENSG00000183087.14|0|6006	20	102.6
ENSG00000266074.8|mRNA|BAHCC1|ENSG00000266074.8|ENSG00000266074.8|0|13473	20	128.8
ENSG00000170876.7|mRNA|TMEM43|ENSG00000170876.7|ENSG00000170876.7|0|3572	20	175
hsa_circ_0008417|circRNA|hsa_circ_0008417|hsa_circ_0008417|hsa_circ_0008417|0|600	20	194.05
ENSG00000109072.13|mRNA|VTN|ENSG00000109072.13|ENSG00000109072.13|0|2427	20	204.95
ENSG00000139318.7|mRNA|DUSP6|ENSG00000139318.7|ENSG00000139318.7|0|4632	20	221
ENSG00000148396.18|mRNA|SEC16A|ENSG00000148396.18|ENSG00000148396.18|0|9975	20	239.95
ENSG00000154237.12|mRNA|LRRK1|ENSG00000154237.12|ENSG00000154237.12|0|17600	20	246.95
hsa_circ_0036865|circRNA|hsa_circ_0036865|hsa_circ_0036865|hsa_circ_0036865|0|600	20	249.95
hsa_circ_0074228|circRNA|hsa_circ_0074228|hsa_circ_0074228|hsa_circ_0074228|0|220	20	252.95
hsa_circ_0004593|circRNA|hsa_circ_0004593|hsa_circ_0004593|hsa_circ_0004593|0|600	20	253.8
ENSG00000251322.7|mRNA|SHANK3|ENSG00000251322.7|ENSG00000251322.7|0|7455	20	256.5
hsa_circ_0035129|circRNA|hsa_circ_0035129|hsa_circ_0035129|hsa_circ_0035129|0|600	20	263.05
hsa_circ_0001721|circRNA|hsa_circ_0001721|hsa_circ_0001721|hsa_circ_0001721|0|492	20	267.3
ENSG00000149782.11|mRNA|PLCB3|ENSG00000149782.11|ENSG00000149782.11|0|4964	20	267.95
ENSG00000140577.15|mRNA|CRTC3|ENSG00000140577.15|ENSG00000140577.15|0|10814	20	273.9
ENSG00000109743.10|mRNA|BST1|ENSG00000109743.10|ENSG00000109743.10|0|2980	20	274.7
hsa_circ_0003016|circRNA|hsa_circ_0003016|hsa_circ_0003016|hsa_circ_0003016|0|600	20	278.25
hsa_circ_0007262|circRNA|hsa_circ_0007262|hsa_circ_0007262|hsa_circ_0007262|0|600	20	279.15
ENSG00000135636.13|mRNA|DYSF|ENSG00000135636.13|ENSG00000135636.13|0|8386	20	279.3
hsa_circ_0005756|circRNA|hsa_circ_0005756|hsa_circ_0005756|hsa_circ_0005756|0|568	20	279.55
hsa_circ_0005927|circRNA|hsa_circ_0005927|hsa_circ_0005927|hsa_circ_0005927|0|600	20	284.85
hsa_circ_0000786|circRNA|hsa_circ_0000786|hsa_circ_0000786|hsa_circ_0000786|0|600	20	290
hsa_circ_0030279|circRNA|hsa_circ_0030279|hsa_circ_0030279|hsa_circ_0030279|0|600	20	294
ENSG00000141002.19|mRNA|TCF25|ENSG00000141002.19|ENSG00000141002.19|0|7967	20	298.85
ENSG00000186081.11|mRNA|KRT5|ENSG00000186081.11|ENSG00000186081.11|0|4292	20	301.7
ENSG00000005882.11|mRNA|PDK2|ENSG00000005882.11|ENSG00000005882.11|0|5481	20	303.35
ENSG00000141367.11|mRNA|CLTC|ENSG00000141367.11|ENSG00000141367.11|0|11836	20	313.05
hsa_circ_0075275|circRNA|hsa_circ_0075275|hsa_circ_0075275|hsa_circ_0075275|0|600	20	314.5
ENSG00000166165.12|mRNA|CKB|ENSG00000166165.12|ENSG00000166165.12|0|2669	20	318
hsa_circ_0002458|circRNA|hsa_circ_0002458|hsa_circ_0002458|hsa_circ_0002458|0|568	20	333.1
hsa_circ_0024065|circRNA|hsa_circ_0024065|hsa_circ_0024065|hsa_circ_0024065|0|600	19	172.895
hsa_circ_0001771|circRNA|hsa_circ_0001771|hsa_circ_0001771|hsa_circ_0001771|0|600	19	186.842
hsa_circ_0008190|circRNA|hsa_circ_0008190|hsa_circ_0008190|hsa_circ_0008190|0|544	19	190.895
ENSG00000258461.5|mRNA|AC012651.1|ENSG00000258461.5|ENSG00000258461.5|0|4670	19	195.053
ENSG00000275832.4|mRNA|ARHGAP23|ENSG00000275832.4|ENSG00000275832.4|0|8133	19	202.526
hsa_circ_0079303|circRNA|hsa_circ_0079303|hsa_circ_0079303|hsa_circ_0079303|0|600	19	206
hsa_circ_0012552|circRNA|hsa_circ_0012552|hsa_circ_0012552|hsa_circ_0012552|0|590	19	212.684
ENSG00000008710.19|mRNA|PKD1|ENSG00000008710.19|ENSG00000008710.19|0|18532	19	217.158
ENSG00000124507.10|mRNA|PACSIN1|ENSG00000124507.10|ENSG00000124507.10|0|4807	19	217.947
hsa_circ_0017443|circRNA|hsa_circ_0017443|hsa_circ_0017443|hsa_circ_0017443|0|600	19	219.368
ENSG00000167978.16|mRNA|SRRM2|ENSG00000167978.16|ENSG00000167978.16|0|13266	19	219.632
ENSG00000124222.22|mRNA|STX16|ENSG00000124222.22|ENSG00000124222.22|0|5099	19	223.947
hsa_circ_0033150|circRNA|hsa_circ_0033150|hsa_circ_0033150|hsa_circ_0033150|0|408	19	224.474
ENSG00000103335.21|mRNA|PIEZO1|ENSG00000103335.21|ENSG00000103335.21|0|10855	19	228.105
ENSG00000153066.12|mRNA|TXNDC11|ENSG00000153066.12|ENSG00000153066.12|0|4292	19	228.895
ENSG00000253227.1|lncRNA|AC090192.2|ENSG00000253227.1|ENSG00000253227.1|0|553	19	231.158
ENSG00000157657.14|mRNA|ZNF618|ENSG00000157657.14|ENSG00000157657.14|0|10384	19	233.632
hsa_circ_0001450|circRNA|hsa_circ_0001450|hsa_circ_0001450|hsa_circ_0001450|0|600	19	233.684
ENSG00000169926.10|mRNA|KLF13|ENSG00000169926.10|ENSG00000169926.10|0|9409	19	234.632
ENSG00000230551.4|lncRNA|AC021078.1|ENSG00000230551.4|ENSG00000230551.4|0|8636	19	235.105
ENSG00000162496.8|mRNA|DHRS3|ENSG00000162496.8|ENSG00000162496.8|0|3036	19	235.158
ENSG00000269891.2|mRNA|ARHGAP19-SLIT1|ENSG00000269891.2|ENSG00000269891.2|0|4089	19	247.316
ENSG00000158828.7|mRNA|PINK1|ENSG00000158828.7|ENSG00000158828.7|0|4836	19	248.368
hsa_circ_0085760|circRNA|hsa_circ_0085760|hsa_circ_0085760|hsa_circ_0085760|0|600	19	253.684
ENSG00000182054.9|mRNA|IDH2|ENSG00000182054.9|ENSG00000182054.9|0|2814	19	254.263
ENSG00000267169.1|lncRNA|AC022098.1|ENSG00000267169.1|ENSG00000267169.1|0|3186	19	254.368
hsa_circ_0008553|circRNA|hsa_circ_0008553|hsa_circ_0008553|hsa_circ_0008553|0|584	19	256.895
ENSG00000197102.10|mRNA|DYNC1H1|ENSG00000197102.10|ENSG00000197102.10|0|15826	19	256.947
ENSG00000114999.7|mRNA|TTL|ENSG00000114999.7|ENSG00000114999.7|0|15732	19	258.789
ENSG00000005844.17|mRNA|ITGAL|ENSG00000005844.17|ENSG00000005844.17|0|6472	19	259.895
hsa_circ_0006697|circRNA|hsa_circ_0006697|hsa_circ_0006697|hsa_circ_0006697|0|422	19	262.263
ENSG00000011114.14|mRNA|BTBD7|ENSG00000011114.14|ENSG00000011114.14|0|11333	19	265.737
hsa_circ_0002748|circRNA|hsa_circ_0002748|hsa_circ_0002748|hsa_circ_0002748|0|600	19	266.526
ENSG00000138760.9|mRNA|SCARB2|ENSG00000138760.9|ENSG00000138760.9|0|19341	19	266.526
hsa_circ_0038655|circRNA|hsa_circ_0038655|hsa_circ_0038655|hsa_circ_0038655|0|488	19	266.789
ENSG00000105287.12|mRNA|PRKD2|ENSG00000105287.12|ENSG00000105287.12|0|5446	19	269.053
ENSG00000107317.12|mRNA|PTGDS|ENSG00000107317.12|ENSG00000107317.12|0|2711	19	277.053
hsa_circ_0023426|circRNA|hsa_circ_0023426|hsa_circ_0023426|hsa_circ_0023426|0|600	19	279
ENSG00000237296.9|pseudogene|SMG1P1|ENSG00000237296.9|ENSG00000237296.9|0|7046	19	279.737
ENSG00000114374.12|mRNA|USP9Y|ENSG00000114374.12|ENSG00000114374.12|0|11237	19	281
hsa_circ_0082580|circRNA|hsa_circ_0082580|hsa_circ_0082580|hsa_circ_0082580|0|600	19	285.105
hsa_circ_0079647|circRNA|hsa_circ_0079647|hsa_circ_0079647|hsa_circ_0079647|0|366	19	286.579
hsa_circ_0083862|circRNA|hsa_circ_0083862|hsa_circ_0083862|hsa_circ_0083862|0|600	19	288.211
ENSG00000101470.9|mRNA|TNNC2|ENSG00000101470.9|ENSG00000101470.9|0|876	19	288.684
hsa_circ_0008234|circRNA|hsa_circ_0008234|hsa_circ_0008234|hsa_circ_0008234|0|600	19	290.316
ENSG00000144909.7|mRNA|OSBPL11|ENSG00000144909.7|ENSG00000144909.7|0|4191	19	296.895
hsa_circ_0070197|circRNA|hsa_circ_0070197|hsa_circ_0070197|hsa_circ_0070197|0|600	19	298.158
ENSG00000213185.6|mRNA|FAM24B|ENSG00000213185.6|ENSG00000213185.6|0|1177	19	298.368
ENSG00000100292.16|mRNA|HMOX1|ENSG00000100292.16|ENSG00000100292.16|0|2405	19	303.211
ENSG00000013288.8|mRNA|MAN2B2|ENSG00000013288.8|ENSG00000013288.8|0|8898	19	307.105
ENSG00000265735.2|srpRNA|RN7SL5P|ENSG00000265735.2|ENSG00000265735.2|0|321	19	313.526
hsa_circ_0002035|circRNA|hsa_circ_0002035|hsa_circ_0002035|hsa_circ_0002035|0|600	18	188.833
ENSG00000205976.4|pseudogene|AC091951.1|ENSG00000205976.4|ENSG00000205976.4|0|2465	18	192.444
ENSG00000135473.14|mRNA|PAN2|ENSG00000135473.14|ENSG00000135473.14|0|7288	18	192.833
ENSG00000112473.17|mRNA|SLC39A7|ENSG00000112473.17|ENSG00000112473.17|0|2845	18	207.444
hsa_circ_0005836|circRNA|hsa_circ_0005836|hsa_circ_0005836|hsa_circ_0005836|0|404	18	210.944
ENSG00000122783.16|mRNA|C7orf49|ENSG00000122783.16|ENSG00000122783.16|0|5321	18	214.611
ENSG00000255036.6|lncRNA|AL512590.3|ENSG00000255036.6|ENSG00000255036.6|0|7116	18	219.389
hsa_circ_0085441|circRNA|hsa_circ_0085441|hsa_circ_0085441|hsa_circ_0085441|0|600	18	224.722
hsa_circ_0002216|circRNA|hsa_circ_0002216|hsa_circ_0002216|hsa_circ_0002216|0|600	18	229.222
ENSG00000140943.16|mRNA|MBTPS1|ENSG00000140943.16|ENSG00000140943.16|0|10238	18	230.389
ENSG00000109118.13|mRNA|PHF12|ENSG00000109118.13|ENSG00000109118.13|0|12227	18	233.778
hsa_circ_0070802|circRNA|hsa_circ_0070802|hsa_circ_0070802|hsa_circ_0070802|0|472	18	241.056
ENSG00000177728.16|mRNA|TMEM94|ENSG00000177728.16|ENSG00000177728.16|0|8854	18	241.889
hsa_circ_0001436|circRNA|hsa_circ_0001436|hsa_circ_0001436|hsa_circ_0001436|0|600	18	242.111
ENSG00000186153.16|mRNA|WWOX|ENSG00000186153.16|ENSG00000186153.16|0|4886	18	244.611
hsa_circ_0065243|circRNA|hsa_circ_0065243|hsa_circ_0065243|hsa_circ_0065243|0|600	18	246.444
ENSG00000196821.9|mRNA|C6orf106|ENSG00000196821.9|ENSG00000196821.9|0|4551	18	246.889
hsa_circ_0007222|circRNA|hsa_circ_0007222|hsa_circ_0007222|hsa_circ_0007222|0|600	18	249.333
ENSG00000168394.10|mRNA|TAP1|ENSG00000168394.10|ENSG00000168394.10|0|4578	18	257.167
ENSG00000233108.1|lncRNA|AC006042.2|ENSG00000233108.1|ENSG00000233108.1|0|568	18	264.778
ENSG00000269743.2|mRNA|SLC25A53|ENSG00000269743.2|ENSG00000269743.2|0|6845	18	265.5
hsa_circ_0036390|circRNA|hsa_circ_0036390|hsa_circ_0036390|hsa_circ_0036390|0|294	18	265.889
ENSG00000161010.14|mRNA|MRNIP|ENSG00000161010.14|ENSG00000161010.14|0|8496	18	266.389
ENSG00000117228.9|mRNA|GBP1|ENSG00000117228.9|ENSG00000117228.9|0|4992	18	266.5
ENSG00000121060.16|mRNA|TRIM25|ENSG00000121060.16|ENSG00000121060.16|0|6666	18	272.056
ENSG00000161542.16|mRNA|PRPSAP1|ENSG00000161542.16|ENSG00000161542.16|0|6939	18	272.056
ENSG00000231535.5|lncRNA|LINC00278|ENSG00000231535.5|ENSG00000231535.5|0|775	18	278.167
ENSG00000269028.3|mRNA|MTRNR2L12|ENSG00000269028.3|ENSG00000269028.3|0|1049	18	284.222
ENSG00000115977.18|mRNA|AAK1|ENSG00000115977.18|ENSG00000115977.18|0|23608	18	285.389
ENSG00000143772.9|mRNA|ITPKB|ENSG00000143772.9|ENSG00000143772.9|0|7036	18	285.833
ENSG00000144580.13|mRNA|CNOT9|ENSG00000144580.13|ENSG00000144580.13|0|5289	18	288.556
hsa_circ_0042768|circRNA|hsa_circ_0042768|hsa_circ_0042768|hsa_circ_0042768|0|600	18	289.667
ENSG00000234545.7|mRNA|FAM133B|ENSG00000234545.7|ENSG00000234545.7|0|4462	18	295.389
ENSG00000225205.5|lncRNA|AC078883.1|ENSG00000225205.5|ENSG00000225205.5|0|2447	18	302.667
hsa_circ_0005440|circRNA|hsa_circ_0005440|hsa_circ_0005440|hsa_circ_0005440|0|356	18	309.889
ENSG00000074054.17|mRNA|CLASP1|ENSG00000074054.17|ENSG00000074054.17|0|11052	18	310.889
ENSG00000188219.14|mRNA|POTEE|ENSG00000188219.14|ENSG00000188219.14|0|4192	18	310.944
ENSG00000108474.16|mRNA|PIGL|ENSG00000108474.16|ENSG00000108474.16|0|6162	18	318.444
ENSG00000230373.8|pseudogene|GOLGA6L5P|ENSG00000230373.8|ENSG00000230373.8|0|3899	18	319.944
ENSG00000151292.17|mRNA|CSNK1G3|ENSG00000151292.17|ENSG00000151292.17|0|5000	18	322.167
ENSG00000241350.1|pseudogene|PMS2P11|ENSG00000241350.1|ENSG00000241350.1|0|574	18	349.5
ENSG00000243696.4|mRNA|AC006254.1|ENSG00000243696.4|ENSG00000243696.4|0|6315	18	353.444
ENSG00000146232.15|mRNA|NFKBIE|ENSG00000146232.15|ENSG00000146232.15|0|2581	17	174.412
ENSG00000106133.17|pseudogene|NSUN5P2|ENSG00000106133.17|ENSG00000106133.17|0|2576	17	180.824
ENSG00000151655.18|mRNA|ITIH2|ENSG00000151655.18|ENSG00000151655.18|0|3378	17	199.647
hsa_circ_0005702|circRNA|hsa_circ_0005702|hsa_circ_0005702|hsa_circ_0005702|0|346	17	218.824
ENSG00000058668.14|mRNA|ATP2B4|ENSG00000058668.14|ENSG00000058668.14|0|9721	17	219.588
hsa_circ_0015726|circRNA|hsa_circ_0015726|hsa_circ_0015726|hsa_circ_0015726|0|372	17	222
ENSG00000173166.17|mRNA|RAPH1|ENSG00000173166.17|ENSG00000173166.17|0|11697	17	228.706
hsa_circ_0000226|circRNA|hsa_circ_0000226|hsa_circ_0000226|hsa_circ_0000226|0|518	17	228.765
ENSG00000125850.10|mRNA|OVOL2|ENSG00000125850.10|ENSG00000125850.10|0|2175	17	236.765
ENSG00000119723.16|mRNA|COQ6|ENSG00000119723.16|ENSG00000119723.16|0|6686	17	236.824
ENSG00000147124.12|mRNA|ZNF41|ENSG00000147124.12|ENSG00000147124.12|0|4784	17	237.471
ENSG00000086758.15|mRNA|HUWE1|ENSG00000086758.15|ENSG00000086758.15|0|17380	17	237.706
hsa_circ_0003314|circRNA|hsa_circ_0003314|hsa_circ_0003314|hsa_circ_0003314|0|600	17	239.529
hsa_circ_0087631|circRNA|hsa_circ_0087631|hsa_circ_0087631|hsa_circ_0087631|0|600	17	244.294
hsa_circ_0001727|circRNA|hsa_circ_0001727|hsa_circ_0001727|hsa_circ_0001727|0|600	17	249.059
hsa_circ_0079645|circRNA|hsa_circ_0079645|hsa_circ_0079645|hsa_circ_0079645|0|600	17	255.176
ENSG00000174384.9|pseudogene|PMS2P6|ENSG00000174384.9|ENSG00000174384.9|0|710	17	258.471
hsa_circ_0001839|circRNA|hsa_circ_0001839|hsa_circ_0001839|hsa_circ_0001839|0|584	17	260.941
ENSG00000104853.15|mRNA|CLPTM1|ENSG00000104853.15|ENSG00000104853.15|0|5229	17	271.588
ENSG00000184634.15|mRNA|MED12|ENSG00000184634.15|ENSG00000184634.15|0|7425	17	273.882
hsa_circ_0066801|circRNA|hsa_circ_0066801|hsa_circ_0066801|hsa_circ_0066801|0|600	17	275.118
ENSG00000159335.15|mRNA|PTMS|ENSG00000159335.15|ENSG00000159335.15|0|1475	17	277.529
hsa_circ_0006393|circRNA|hsa_circ_0006393|hsa_circ_0006393|hsa_circ_0006393|0|600	17	279.118
ENSG00000253729.7|mRNA|PRKDC|ENSG00000253729.7|ENSG00000253729.7|0|15417	17	280.176
hsa_circ_0065160|circRNA|hsa_circ_0065160|hsa_circ_0065160|hsa_circ_0065160|0|600	17	283.176
ENSG00000114670.13|mRNA|NEK11|ENSG00000114670.13|ENSG00000114670.13|0|5355	17	283.765
ENSG00000072803.17|mRNA|FBXW11|ENSG00000072803.17|ENSG00000072803.17|0|5577	17	284.118
hsa_circ_0003302|circRNA|hsa_circ_0003302|hsa_circ_0003302|hsa_circ_0003302|0|600	17	285.059
ENSG00000114450.9|mRNA|GNB4|ENSG00000114450.9|ENSG00000114450.9|0|7035	17	285.882
hsa_circ_0054683|circRNA|hsa_circ_0054683|hsa_circ_0054683|hsa_circ_0054683|0|520	17	288.118
hsa_circ_0032064|circRNA|hsa_circ_0032064|hsa_circ_0032064|hsa_circ_0032064|0|308	17	292.353
hsa_circ_0061985|circRNA|hsa_circ_0061985|hsa_circ_0061985|hsa_circ_0061985|0|600	17	293.588
ENSG00000283398.1|lncRNA|AC114737.3|ENSG00000283398.1|ENSG00000283398.1|0|570	17	295.294
ENSG00000146021.14|mRNA|KLHL3|ENSG00000146021.14|ENSG00000146021.14|0|11854	17	295.471
hsa_circ_0000605|circRNA|hsa_circ_0000605|hsa_circ_0000605|hsa_circ_0000605|0|600	17	296.471
hsa_circ_0029704|circRNA|hsa_circ_0029704|hsa_circ_0029704|hsa_circ_0029704|0|600	17	296.824
ENSG00000084234.16|mRNA|APLP2|ENSG00000084234.16|ENSG00000084234.16|0|7451	17	297.882
ENSG00000038382.18|mRNA|TRIO|ENSG00000038382.18|ENSG00000038382.18|0|17500	17	300.412
ENSG00000113712.17|mRNA|CSNK1A1|ENSG00000113712.17|ENSG00000113712.17|0|7714	17	306.412
ENSG00000279928.2|pseudogene|FO538757.2|ENSG00000279928.2|ENSG00000279928.2|0|570	17	307.882
hsa_circ_0060624|circRNA|hsa_circ_0060624|hsa_circ_0060624|hsa_circ_0060624|0|600	17	310.824
ENSG00000213390.10|mRNA|ARHGAP19|ENSG00000213390.10|ENSG00000213390.10|0|6167	17	315.529
ENSG00000197816.13|mRNA|CCDC180|ENSG00000197816.13|ENSG00000197816.13|0|14155	17	315.882
ENSG00000182871.14|mRNA|COL18A1|ENSG00000182871.14|ENSG00000182871.14|0|8525	17	316.412
hsa_circ_0000654|circRNA|hsa_circ_0000654|hsa_circ_0000654|hsa_circ_0000654|0|498	17	326.529
hsa_circ_0007206|circRNA|hsa_circ_0007206|hsa_circ_0007206|hsa_circ_0007206|0|594	16	176.688
hsa_circ_0072464|circRNA|hsa_circ_0072464|hsa_circ_0072464|hsa_circ_0072464|0|538	16	179.188
hsa_circ_0017359|circRNA|hsa_circ_0017359|hsa_circ_0017359|hsa_circ_0017359|0|590	16	191.688
hsa_circ_0002275|circRNA|hsa_circ_0002275|hsa_circ_0002275|hsa_circ_0002275|0|600	16	194.188
ENSG00000101191.16|mRNA|DIDO1|ENSG00000101191.16|ENSG00000101191.16|0|13281	16	204.25
ENSG00000072121.15|mRNA|ZFYVE26|ENSG00000072121.15|ENSG00000072121.15|0|15706	16	210.188
hsa_circ_0007380|circRNA|hsa_circ_0007380|hsa_circ_0007380|hsa_circ_0007380|0|356	16	210.312
hsa_circ_0073156|circRNA|hsa_circ_0073156|hsa_circ_0073156|hsa_circ_0073156|0|600	16	212.062
ENSG00000166479.9|mRNA|TMX3|ENSG00000166479.9|ENSG00000166479.9|0|7637	16	215.5
ENSG00000196664.4|mRNA|TLR7|ENSG00000196664.4|ENSG00000196664.4|0|5209	16	217.625
hsa_circ_0008140|circRNA|hsa_circ_0008140|hsa_circ_0008140|hsa_circ_0008140|0|600	16	218.5
ENSG00000154620.5|mRNA|TMSB4Y|ENSG00000154620.5|ENSG00000154620.5|0|1669	16	224.438
hsa_circ_0009024|circRNA|hsa_circ_0009024|hsa_circ_0009024|hsa_circ_0009024|0|596	16	229.25
ENSG00000259498.1|lncRNA|AC079328.2|ENSG00000259498.1|ENSG00000259498.1|0|3354	16	230.812
hsa_circ_0080251|circRNA|hsa_circ_0080251|hsa_circ_0080251|hsa_circ_0080251|0|600	16	239.625
ENSG00000197976.11|mRNA|AKAP17A|ENSG00000197976.11|ENSG00000197976.11|0|4075	16	240.562
ENSG00000254979.5|mRNA|AP000781.2|ENSG00000254979.5|ENSG00000254979.5|0|2242	16	244.438
ENSG00000129675.15|mRNA|ARHGEF6|ENSG00000129675.15|ENSG00000129675.15|0|6434	16	247.75
ENSG00000134905.16|mRNA|CARS2|ENSG00000134905.16|ENSG00000134905.16|0|10460	16	248.75
hsa_circ_0032275|circRNA|hsa_circ_0032275|hsa_circ_0032275|hsa_circ_0032275|0|600	16	251.938
ENSG00000005339.14|mRNA|CREBBP|ENSG00000005339.14|ENSG00000005339.14|0|15492	16	256.75
hsa_circ_0004610|circRNA|hsa_circ_0004610|hsa_circ_0004610|hsa_circ_0004610|0|600	16	258
hsa_circ_0006839|circRNA|hsa_circ_0006839|hsa_circ_0006839|hsa_circ_0006839|0|386	16	259.875
ENSG00000151948.11|mRNA|GLT1D1|ENSG00000151948.11|ENSG00000151948.11|0|3478	16	262.25
ENSG00000284690.1|pseudogene|AC079325.2|ENSG00000284690.1|ENSG00000284690.1|0|606	16	262.375
ENSG00000244528.1|pseudogene|SEPT14P2|ENSG00000244528.1|ENSG00000244528.1|0|183	16	268.188
hsa_circ_0060606|circRNA|hsa_circ_0060606|hsa_circ_0060606|hsa_circ_0060606|0|588	16	268.188
ENSG00000248334.6|pseudogene|WHAMMP2|ENSG00000248334.6|ENSG00000248334.6|0|6657	16	269
ENSG00000203896.9|mRNA|LIME1|ENSG00000203896.9|ENSG00000203896.9|0|2550	16	272.438
ENSG00000105058.11|mRNA|FAM32A|ENSG00000105058.11|ENSG00000105058.11|0|1921	16	273.062
hsa_circ_0007351|circRNA|hsa_circ_0007351|hsa_circ_0007351|hsa_circ_0007351|0|380	16	273.75
ENSG00000115368.9|mRNA|WDR75|ENSG00000115368.9|ENSG00000115368.9|0|5066	16	274.25
ENSG00000139971.15|mRNA|C14orf37|ENSG00000139971.15|ENSG00000139971.15|0|7565	16	278.562
hsa_circ_0071124|circRNA|hsa_circ_0071124|hsa_circ_0071124|hsa_circ_0071124|0|320	16	280.188
ENSG00000166923.10|mRNA|GREM1|ENSG00000166923.10|ENSG00000166923.10|0|14606	16	280.25
ENSG00000164713.9|mRNA|BRI3|ENSG00000164713.9|ENSG00000164713.9|0|5139	16	281.312
ENSG00000250073.2|lncRNA|AP000866.2|ENSG00000250073.2|ENSG00000250073.2|0|1538	16	284.875
ENSG00000253755.1|pseudogene|IGHGP|ENSG00000253755.1|ENSG00000253755.1|0|1178	16	285.25
hsa_circ_0029062|circRNA|hsa_circ_0029062|hsa_circ_0029062|hsa_circ_0029062|0|600	16	288.312
hsa_circ_0004660|circRNA|hsa_circ_0004660|hsa_circ_0004660|hsa_circ_0004660|0|494	16	289.188
ENSG00000199565.1|Y_RNA|Y_RNA|ENSG00000199565.1|ENSG00000199565.1|0|102	16	289.25
ENSG00000282034.1|mRNA|AC106886.5|ENSG00000282034.1|ENSG00000282034.1|0|11692	16	296.438
hsa_circ_0077227|circRNA|hsa_circ_0077227|hsa_circ_0077227|hsa_circ_0077227|0|600	16	300.062
hsa_circ_0085128|circRNA|hsa_circ_0085128|hsa_circ_0085128|hsa_circ_0085128|0|600	16	302.062
hsa_circ_0057027|circRNA|hsa_circ_0057027|hsa_circ_0057027|hsa_circ_0057027|0|360	16	302.812
ENSG00000137812.19|mRNA|KNL1|ENSG00000137812.19|ENSG00000137812.19|0|10250	16	307.75
hsa_circ_0032939|circRNA|hsa_circ_0032939|hsa_circ_0032939|hsa_circ_0032939|0|448	16	315.312
ENSG00000167613.15|mRNA|LAIR1|ENSG00000167613.15|ENSG00000167613.15|0|8071	16	319.188
ENSG00000143815.14|mRNA|LBR|ENSG00000143815.14|ENSG00000143815.14|0|5257	16	321.125
hsa_circ_0000972|circRNA|hsa_circ_0000972|hsa_circ_0000972|hsa_circ_0000972|0|600	16	322.75
ENSG00000260335.1|pseudogene|AC133555.4|ENSG00000260335.1|ENSG00000260335.1|0|152	16	326.188
ENSG00000160179.18|mRNA|ABCG1|ENSG00000160179.18|ENSG00000160179.18|0|6121	16	326.562
ENSG00000174652.17|mRNA|ZNF266|ENSG00000174652.17|ENSG00000174652.17|0|5267	16	334.5
ENSG00000204463.12|mRNA|BAG6|ENSG00000204463.12|ENSG00000204463.12|0|5310	16	335.062
hsa_circ_0003956|circRNA|hsa_circ_0003956|hsa_circ_0003956|hsa_circ_0003956|0|600	16	341.562
hsa_circ_0040827|circRNA|hsa_circ_0040827|hsa_circ_0040827|hsa_circ_0040827|0|496	16	345.688
hsa_circ_0003753|circRNA|hsa_circ_0003753|hsa_circ_0003753|hsa_circ_0003753|0|600	15	133.8
ENSG00000165841.9|mRNA|CYP2C19|ENSG00000165841.9|ENSG00000165841.9|0|2812	15	142.867
ENSG00000235802.1|lncRNA|HCFC1-AS1|ENSG00000235802.1|ENSG00000235802.1|0|350	15	175.533
ENSG00000272645.3|pseudogene|GTF2IP20|ENSG00000272645.3|ENSG00000272645.3|0|4145	15	176.267
ENSG00000198742.9|mRNA|SMURF1|ENSG00000198742.9|ENSG00000198742.9|0|6276	15	198.733
ENSG00000112659.13|mRNA|CUL9|ENSG00000112659.13|ENSG00000112659.13|0|12251	15	204.8
ENSG00000118520.14|mRNA|ARG1|ENSG00000118520.14|ENSG00000118520.14|0|1965	15	208.333
ENSG00000266953.6|mRNA|AC092073.1|ENSG00000266953.6|ENSG00000266953.6|0|974	15	208.467
ENSG00000170634.12|mRNA|ACYP2|ENSG00000170634.12|ENSG00000170634.12|0|4964	15	210.467
hsa_circ_0032266|circRNA|hsa_circ_0032266|hsa_circ_0032266|hsa_circ_0032266|0|600	15	217.6
ENSG00000072609.17|mRNA|CHFR|ENSG00000072609.17|ENSG00000072609.17|0|17127	15	226.2
hsa_circ_0017921|circRNA|hsa_circ_0017921|hsa_circ_0017921|hsa_circ_0017921|0|600	15	232.667
hsa_circ_0007793|circRNA|hsa_circ_0007793|hsa_circ_0007793|hsa_circ_0007793|0|568	15	232.933
ENSG00000162736.15|mRNA|NCSTN|ENSG00000162736.15|ENSG00000162736.15|0|4175	15	233.067
hsa_circ_0039268|circRNA|hsa_circ_0039268|hsa_circ_0039268|hsa_circ_0039268|0|600	15	236.867
ENSG00000204590.12|mRNA|GNL1|ENSG00000204590.12|ENSG00000204590.12|0|8646	15	239.267
hsa_circ_0028337|circRNA|hsa_circ_0028337|hsa_circ_0028337|hsa_circ_0028337|0|600	15	243.333
ENSG00000142920.16|mRNA|AZIN2|ENSG00000142920.16|ENSG00000142920.16|0|6559	15	244.067
hsa_circ_0030608|circRNA|hsa_circ_0030608|hsa_circ_0030608|hsa_circ_0030608|0|600	15	244.933
ENSG00000161021.12|mRNA|MAML1|ENSG00000161021.12|ENSG00000161021.12|0|5942	15	245.933
ENSG00000105732.12|mRNA|ZNF574|ENSG00000105732.12|ENSG00000105732.12|0|4666	15	246.733
ENSG00000240303.7|mRNA|ACAD11|ENSG00000240303.7|ENSG00000240303.7|0|5674	15	254.267
hsa_circ_0072901|circRNA|hsa_circ_0072901|hsa_circ_0072901|hsa_circ_0072901|0|502	15	255.533
hsa_circ_0006773|circRNA|hsa_circ_0006773|hsa_circ_0006773|hsa_circ_0006773|0|600	15	256.133
ENSG00000231721.6|lncRNA|LINC-PINT|ENSG00000231721.6|ENSG00000231721.6|0|4515	15	256.867
ENSG00000104886.11|mRNA|PLEKHJ1|ENSG00000104886.11|ENSG00000104886.11|0|4655	15	261.533
ENSG00000259118.5|lncRNA|AL139022.1|ENSG00000259118.5|ENSG00000259118.5|0|1377	15	261.733
ENSG00000282572.2|lncRNA|AC215522.2|ENSG00000282572.2|ENSG00000282572.2|0|1556	15	262.067
ENSG00000132205.10|mRNA|EMILIN2|ENSG00000132205.10|ENSG00000132205.10|0|6435	15	264.067
ENSG00000204160.11|mRNA|ZDHHC18|ENSG00000204160.11|ENSG00000204160.11|0|5436	15	264.4
ENSG00000118640.10|mRNA|VAMP8|ENSG00000118640.10|ENSG00000118640.10|0|990	15	265.533
ENSG00000185614.4|mRNA|FAM212A|ENSG00000185614.4|ENSG00000185614.4|0|1040	15	269.4
ENSG00000105556.11|mRNA|MIER2|ENSG00000105556.11|ENSG00000105556.11|0|7939	15	269.867
hsa_circ_0025905|circRNA|hsa_circ_0025905|hsa_circ_0025905|hsa_circ_0025905|0|424	15	270.067
ENSG00000249055.1|pseudogene|TBCAP3|ENSG00000249055.1|ENSG00000249055.1|0|312	15	271.2
ENSG00000204256.12|mRNA|BRD2|ENSG00000204256.12|ENSG00000204256.12|0|7337	15	275.2
ENSG00000166716.9|mRNA|ZNF592|ENSG00000166716.9|ENSG00000166716.9|0|8134	15	278
ENSG00000129824.15|mRNA|RPS4Y1|ENSG00000129824.15|ENSG00000129824.15|0|2275	15	278.2
hsa_circ_0060235|circRNA|hsa_circ_0060235|hsa_circ_0060235|hsa_circ_0060235|0|600	15	278.933
ENSG00000125755.18|mRNA|SYMPK|ENSG00000125755.18|ENSG00000125755.18|0|10628	15	280.667
hsa_circ_0005371|circRNA|hsa_circ_0005371|hsa_circ_0005371|hsa_circ_0005371|0|486	15	282.267
hsa_circ_0037973|circRNA|hsa_circ_0037973|hsa_circ_0037973|hsa_circ_0037973|0|600	15	292.4
ENSG00000179085.7|mRNA|DPM3|ENSG00000179085.7|ENSG00000179085.7|0|622	15	296.867
ENSG00000039523.19|mRNA|RIPOR1|ENSG00000039523.19|ENSG00000039523.19|0|6729	15	299.467
hsa_circ_0003856|circRNA|hsa_circ_0003856|hsa_circ_0003856|hsa_circ_0003856|0|428	15	300.067
ENSG00000139990.17|mRNA|DCAF5|ENSG00000139990.17|ENSG00000139990.17|0|8295	15	305.867
ENSG00000138834.12|mRNA|MAPK8IP3|ENSG00000138834.12|ENSG00000138834.12|0|10285	15	306.133
ENSG00000184575.11|mRNA|XPOT|ENSG00000184575.11|ENSG00000184575.11|0|7364	15	307.533
hsa_circ_0036376|circRNA|hsa_circ_0036376|hsa_circ_0036376|hsa_circ_0036376|0|402	15	308
ENSG00000082068.8|mRNA|WDR70|ENSG00000082068.8|ENSG00000082068.8|0|7039	15	308.8
ENSG00000091039.16|mRNA|OSBPL8|ENSG00000091039.16|ENSG00000091039.16|0|9198	15	309.133
hsa_circ_0024217|circRNA|hsa_circ_0024217|hsa_circ_0024217|hsa_circ_0024217|0|600	15	310
ENSG00000169564.6|mRNA|PCBP1|ENSG00000169564.6|ENSG00000169564.6|0|1750	15	310.133
ENSG00000263740.2|srpRNA|RN7SL4P|ENSG00000263740.2|ENSG00000263740.2|0|295	15	317.8
ENSG00000279444.1|lncRNA|AC135584.1|ENSG00000279444.1|ENSG00000279444.1|0|333	15	318.933
ENSG00000143183.16|mRNA|TMCO1|ENSG00000143183.16|ENSG00000143183.16|0|5584	15	319.2
hsa_circ_0020091|circRNA|hsa_circ_0020091|hsa_circ_0020091|hsa_circ_0020091|0|600	15	320.667
ENSG00000136111.12|mRNA|TBC1D4|ENSG00000136111.12|ENSG00000136111.12|0|6658	15	320.867
ENSG00000225697.12|mRNA|SLC26A6|ENSG00000225697.12|ENSG00000225697.12|0|6373	15	321.467
ENSG00000279474.1|lncRNA|AC125437.2|ENSG00000279474.1|ENSG00000279474.1|0|2167	15	322.867
ENSG00000112232.8|mRNA|KHDRBS2|ENSG00000112232.8|ENSG00000112232.8|0|2332	15	326.2
ENSG00000156858.11|mRNA|PRR14|ENSG00000156858.11|ENSG00000156858.11|0|3860	15	326.933
hsa_circ_0017331|circRNA|hsa_circ_0017331|hsa_circ_0017331|hsa_circ_0017331|0|600	15	333.267
ENSG00000177084.16|mRNA|POLE|ENSG00000177084.16|ENSG00000177084.16|0|16609	15	334.2
hsa_circ_0073587|circRNA|hsa_circ_0073587|hsa_circ_0073587|hsa_circ_0073587|0|600	15	343.2
hsa_circ_0036374|circRNA|hsa_circ_0036374|hsa_circ_0036374|hsa_circ_0036374|0|600	15	344.267
hsa_circ_0077712|circRNA|hsa_circ_0077712|hsa_circ_0077712|hsa_circ_0077712|0|600	15	389.467
ENSG00000084674.14|mRNA|APOB|ENSG00000084674.14|ENSG00000084674.14|0|14828	14	135.5
ENSG00000103064.13|mRNA|SLC7A6|ENSG00000103064.13|ENSG00000103064.13|0|7588	14	137.857
ENSG00000100104.13|mRNA|SRRD|ENSG00000100104.13|ENSG00000100104.13|0|4319	14	160.357
hsa_circ_0065546|circRNA|hsa_circ_0065546|hsa_circ_0065546|hsa_circ_0065546|0|590	14	192.929
ENSG00000243646.9|mRNA|IL10RB|ENSG00000243646.9|ENSG00000243646.9|0|4548	14	208.429
ENSG00000104892.16|mRNA|KLC3|ENSG00000104892.16|ENSG00000104892.16|0|3654	14	213.5
hsa_circ_0024234|circRNA|hsa_circ_0024234|hsa_circ_0024234|hsa_circ_0024234|0|600	14	213.571
ENSG00000241859.6|pseudogene|ANOS2P|ENSG00000241859.6|ENSG00000241859.6|0|2369	14	227.571
ENSG00000153064.11|mRNA|BANK1|ENSG00000153064.11|ENSG00000153064.11|0|6144	14	232.071
ENSG00000164086.9|mRNA|DUSP7|ENSG00000164086.9|ENSG00000164086.9|0|5648	14	233.857
hsa_circ_0006377|circRNA|hsa_circ_0006377|hsa_circ_0006377|hsa_circ_0006377|0|478	14	236.429
hsa_circ_0008341|circRNA|hsa_circ_0008341|hsa_circ_0008341|hsa_circ_0008341|0|600	14	238.357
hsa_circ_0005016|circRNA|hsa_circ_0005016|hsa_circ_0005016|hsa_circ_0005016|0|600	14	240.071
ENSG00000110583.12|mRNA|NAA40|ENSG00000110583.12|ENSG00000110583.12|0|5321	14	244.429
ENSG00000159363.17|mRNA|ATP13A2|ENSG00000159363.17|ENSG00000159363.17|0|5253	14	247.286
ENSG00000215695.1|mRNA|RSC1A1|ENSG00000215695.1|ENSG00000215695.1|0|1854	14	248.786
hsa_circ_0017248|circRNA|hsa_circ_0017248|hsa_circ_0017248|hsa_circ_0017248|0|600	14	248.929
ENSG00000140391.14|mRNA|TSPAN3|ENSG00000140391.14|ENSG00000140391.14|0|8506	14	249.857
ENSG00000151338.18|mRNA|MIPOL1|ENSG00000151338.18|ENSG00000151338.18|0|20250	14	252
hsa_circ_0060551|circRNA|hsa_circ_0060551|hsa_circ_0060551|hsa_circ_0060551|0|530	14	253.5
ENSG00000140332.15|mRNA|TLE3|ENSG00000140332.15|ENSG00000140332.15|0|12634	14	257.214
hsa_circ_0008592|circRNA|hsa_circ_0008592|hsa_circ_0008592|hsa_circ_0008592|0|582	14	258.429
ENSG00000155975.9|mRNA|VPS37A|ENSG00000155975.9|ENSG00000155975.9|0|6784	14	259.143
hsa_circ_0008557|circRNA|hsa_circ_0008557|hsa_circ_0008557|hsa_circ_0008557|0|472	14	262.071
ENSG00000166927.12|mRNA|MS4A7|ENSG00000166927.12|ENSG00000166927.12|0|4348	14	266.214
ENSG00000106049.8|mRNA|HIBADH|ENSG00000106049.8|ENSG00000106049.8|0|2323	14	266.857
ENSG00000110324.10|mRNA|IL10RA|ENSG00000110324.10|ENSG00000110324.10|0|8102	14	267
hsa_circ_0060845|circRNA|hsa_circ_0060845|hsa_circ_0060845|hsa_circ_0060845|0|600	14	270.5
ENSG00000171777.15|mRNA|RASGRP4|ENSG00000171777.15|ENSG00000171777.15|0|4183	14	270.571
hsa_circ_0062074|circRNA|hsa_circ_0062074|hsa_circ_0062074|hsa_circ_0062074|0|492	14	271.857
ENSG00000266786.1|pseudogene|LGALS9DP|ENSG00000266786.1|ENSG00000266786.1|0|764	14	272
hsa_circ_0039251|circRNA|hsa_circ_0039251|hsa_circ_0039251|hsa_circ_0039251|0|600	14	272.214
hsa_circ_0067684|circRNA|hsa_circ_0067684|hsa_circ_0067684|hsa_circ_0067684|0|278	14	275.286
ENSG00000255302.4|mRNA|EID1|ENSG00000255302.4|ENSG00000255302.4|0|2298	14	276.286
ENSG00000176728.7|lncRNA|TTTY14|ENSG00000176728.7|ENSG00000176728.7|0|3239	14	277.214
hsa_circ_0002220|circRNA|hsa_circ_0002220|hsa_circ_0002220|hsa_circ_0002220|0|600	14	277.5
ENSG00000113300.11|mRNA|CNOT6|ENSG00000113300.11|ENSG00000113300.11|0|6586	14	280.286
hsa_circ_0024032|circRNA|hsa_circ_0024032|hsa_circ_0024032|hsa_circ_0024032|0|600	14	281.786
hsa_circ_0066279|circRNA|hsa_circ_0066279|hsa_circ_0066279|hsa_circ_0066279|0|600	14	284
hsa_circ_0027776|circRNA|hsa_circ_0027776|hsa_circ_0027776|hsa_circ_0027776|0|600	14	284.071
ENSG00000167601.11|mRNA|AXL|ENSG00000167601.11|ENSG00000167601.11|0|5154	14	285.857
ENSG00000137497.17|mRNA|NUMA1|ENSG00000137497.17|ENSG00000137497.17|0|15224	14	286.286
ENSG00000205765.8|mRNA|C5orf51|ENSG00000205765.8|ENSG00000205765.8|0|5572	14	290.786
ENSG00000214826.5|pseudogene|DDX12P|ENSG00000214826.5|ENSG00000214826.5|0|2947	14	291
ENSG00000267110.1|mRNA|AC010327.1|ENSG00000267110.1|ENSG00000267110.1|0|975	14	291.643
hsa_circ_0008846|circRNA|hsa_circ_0008846|hsa_circ_0008846|hsa_circ_0008846|0|600	14	292.643
hsa_circ_0055120|circRNA|hsa_circ_0055120|hsa_circ_0055120|hsa_circ_0055120|0|504	14	292.857
hsa_circ_0024946|circRNA|hsa_circ_0024946|hsa_circ_0024946|hsa_circ_0024946|0|600	14	293.429
hsa_circ_0073396|circRNA|hsa_circ_0073396|hsa_circ_0073396|hsa_circ_0073396|0|600	14	296.071
hsa_circ_0078362|circRNA|hsa_circ_0078362|hsa_circ_0078362|hsa_circ_0078362|0|258	14	299.214
ENSG00000130962.17|mRNA|PRRG1|ENSG00000130962.17|ENSG00000130962.17|0|6180	14	300.429
ENSG00000160688.18|mRNA|FLAD1|ENSG00000160688.18|ENSG00000160688.18|0|4019	14	301.357
hsa_circ_0073219|circRNA|hsa_circ_0073219|hsa_circ_0073219|hsa_circ_0073219|0|600	14	303
ENSG00000147548.16|mRNA|NSD3|ENSG00000147548.16|ENSG00000147548.16|0|15252	14	305.357
hsa_circ_0000617|circRNA|hsa_circ_0000617|hsa_circ_0000617|hsa_circ_0000617|0|600	14	307.143
ENSG00000140983.13|mRNA|RHOT2|ENSG00000140983.13|ENSG00000140983.13|0|5174	14	308.286
ENSG00000231646.5|lncRNA|FSIP2-AS1|ENSG00000231646.5|ENSG00000231646.5|0|880	14	310.643
hsa_circ_0004709|circRNA|hsa_circ_0004709|hsa_circ_0004709|hsa_circ_0004709|0|600	14	316.071
hsa_circ_0032633|circRNA|hsa_circ_0032633|hsa_circ_0032633|hsa_circ_0032633|0|600	14	316.643
ENSG00000142798.17|mRNA|HSPG2|ENSG00000142798.17|ENSG00000142798.17|0|17684	14	318.286
ENSG00000028137.18|mRNA|TNFRSF1B|ENSG00000028137.18|ENSG00000028137.18|0|3766	14	318.357
ENSG00000109906.13|mRNA|ZBTB16|ENSG00000109906.13|ENSG00000109906.13|0|6372	14	320.143
hsa_circ_0005783|circRNA|hsa_circ_0005783|hsa_circ_0005783|hsa_circ_0005783|0|600	14	321.929
ENSG00000128923.10|mRNA|MINDY2|ENSG00000128923.10|ENSG00000128923.10|0|9454	14	329.857
hsa_circ_0086726|circRNA|hsa_circ_0086726|hsa_circ_0086726|hsa_circ_0086726|0|600	14	352.429
ENSG00000277818.1|Y_RNA|Y_RNA|ENSG00000277818.1|ENSG00000277818.1|0|102	14	354.929
hsa_circ_0027464|circRNA|hsa_circ_0027464|hsa_circ_0027464|hsa_circ_0027464|0|534	14	357.571
ENSG00000183337.16|mRNA|BCOR|ENSG00000183337.16|ENSG00000183337.16|0|8544	14	359
ENSG00000197520.10|mRNA|FAM177B|ENSG00000197520.10|ENSG00000197520.10|0|2603	14	387.786
hsa_circ_0019254|circRNA|hsa_circ_0019254|hsa_circ_0019254|hsa_circ_0019254|0|600	14	411.286
ENSG00000171557.16|mRNA|FGG|ENSG00000171557.16|ENSG00000171557.16|0|3600	13	122.692
ENSG00000175938.6|mRNA|ORAI3|ENSG00000175938.6|ENSG00000175938.6|0|2643	13	134.462
ENSG00000198625.12|mRNA|MDM4|ENSG00000198625.12|ENSG00000198625.12|0|11008	13	143.769
ENSG00000198794.11|mRNA|SCAMP5|ENSG00000198794.11|ENSG00000198794.11|0|4873	13	162.692
ENSG00000189136.8|pseudogene|UBE2Q2P1|ENSG00000189136.8|ENSG00000189136.8|0|3008	13	163.154
ENSG00000214331.8|pseudogene|AC009053.1|ENSG00000214331.8|ENSG00000214331.8|0|3828	13	173.538
ENSG00000179094.15|mRNA|PER1|ENSG00000179094.15|ENSG00000179094.15|0|7002	13	178.923
hsa_circ_0078200|circRNA|hsa_circ_0078200|hsa_circ_0078200|hsa_circ_0078200|0|600	13	182.692
ENSG00000114841.17|mRNA|DNAH1|ENSG00000114841.17|ENSG00000114841.17|0|13872	13	189.308
hsa_circ_0001313|circRNA|hsa_circ_0001313|hsa_circ_0001313|hsa_circ_0001313|0|600	13	191.308
hsa_circ_0034826|circRNA|hsa_circ_0034826|hsa_circ_0034826|hsa_circ_0034826|0|600	13	191.615
ENSG00000254413.8|mRNA|CHKB-CPT1B|ENSG00000254413.8|ENSG00000254413.8|0|5022	13	192.231
hsa_circ_0026236|circRNA|hsa_circ_0026236|hsa_circ_0026236|hsa_circ_0026236|0|600	13	198.769
ENSG00000100030.14|mRNA|MAPK1|ENSG00000100030.14|ENSG00000100030.14|0|11336	13	204.538
ENSG00000080200.9|mRNA|CRYBG3|ENSG00000080200.9|ENSG00000080200.9|0|10929	13	211.154
ENSG00000120709.10|mRNA|FAM53C|ENSG00000120709.10|ENSG00000120709.10|0|7051	13	212.385
hsa_circ_0090739|circRNA|hsa_circ_0090739|hsa_circ_0090739|hsa_circ_0090739|0|600	13	213.769
ENSG00000118113.11|mRNA|MMP8|ENSG00000118113.11|ENSG00000118113.11|0|3438	13	214.077
hsa_circ_0058214|circRNA|hsa_circ_0058214|hsa_circ_0058214|hsa_circ_0058214|0|600	13	216.077
ENSG00000196700.8|mRNA|ZNF512B|ENSG00000196700.8|ENSG00000196700.8|0|5919	13	216.462
ENSG00000269403.1|mRNA|AC008750.8|ENSG00000269403.1|ENSG00000269403.1|0|551	13	216.923
hsa_circ_0008105|circRNA|hsa_circ_0008105|hsa_circ_0008105|hsa_circ_0008105|0|406	13	220.462
hsa_circ_0005268|circRNA|hsa_circ_0005268|hsa_circ_0005268|hsa_circ_0005268|0|356	13	223.231
ENSG00000127507.17|mRNA|ADGRE2|ENSG00000127507.17|ENSG00000127507.17|0|8622	13	226.154
ENSG00000284341.1|mRNA|AL807752.7|ENSG00000284341.1|ENSG00000284341.1|0|989	13	227.923
ENSG00000080603.16|mRNA|SRCAP|ENSG00000080603.16|ENSG00000080603.16|0|13674	13	228.231
hsa_circ_0004578|circRNA|hsa_circ_0004578|hsa_circ_0004578|hsa_circ_0004578|0|600	13	230.231
ENSG00000185009.12|mRNA|AP3M1|ENSG00000185009.12|ENSG00000185009.12|0|5912	13	231.769
ENSG00000100997.18|mRNA|ABHD12|ENSG00000100997.18|ENSG00000100997.18|0|3429	13	234.077
hsa_circ_0017241|circRNA|hsa_circ_0017241|hsa_circ_0017241|hsa_circ_0017241|0|600	13	234.385
hsa_circ_0067344|circRNA|hsa_circ_0067344|hsa_circ_0067344|hsa_circ_0067344|0|384	13	238.077
hsa_circ_0008093|circRNA|hsa_circ_0008093|hsa_circ_0008093|hsa_circ_0008093|0|600	13	240.308
ENSG00000111261.13|mRNA|MANSC1|ENSG00000111261.13|ENSG00000111261.13|0|6015	13	241.615
hsa_circ_0012446|circRNA|hsa_circ_0012446|hsa_circ_0012446|hsa_circ_0012446|0|600	13	241.923
ENSG00000264187.1|mRNA|AC055811.2|ENSG00000264187.1|ENSG00000264187.1|0|1693	13	243.385
hsa_circ_0008702|circRNA|hsa_circ_0008702|hsa_circ_0008702|hsa_circ_0008702|0|596	13	244.154
hsa_circ_0024607|circRNA|hsa_circ_0024607|hsa_circ_0024607|hsa_circ_0024607|0|600	13	246.231
ENSG00000065989.15|mRNA|PDE4A|ENSG00000065989.15|ENSG00000065989.15|0|6646	13	247.692
ENSG00000104375.15|mRNA|STK3|ENSG00000104375.15|ENSG00000104375.15|0|11906	13	247.769
ENSG00000159110.19|mRNA|IFNAR2|ENSG00000159110.19|ENSG00000159110.19|0|4614	13	252.154
ENSG00000055211.12|mRNA|GINM1|ENSG00000055211.12|ENSG00000055211.12|0|2248	13	254.846
ENSG00000116791.13|mRNA|CRYZ|ENSG00000116791.13|ENSG00000116791.13|0|4085	13	256.692
ENSG00000244459.2|lncRNA|AC147067.1|ENSG00000244459.2|ENSG00000244459.2|0|579	13	256.769
ENSG00000168264.10|mRNA|IRF2BP2|ENSG00000168264.10|ENSG00000168264.10|0|4724	13	257.231
ENSG00000106638.15|mRNA|TBL2|ENSG00000106638.15|ENSG00000106638.15|0|5067	13	257.308
hsa_circ_0057727|circRNA|hsa_circ_0057727|hsa_circ_0057727|hsa_circ_0057727|0|600	13	259.385
hsa_circ_0026244|circRNA|hsa_circ_0026244|hsa_circ_0026244|hsa_circ_0026244|0|600	13	260.846
hsa_circ_0005993|circRNA|hsa_circ_0005993|hsa_circ_0005993|hsa_circ_0005993|0|374	13	260.923
ENSG00000104517.12|mRNA|UBR5|ENSG00000104517.12|ENSG00000104517.12|0|13085	13	262.538
ENSG00000012660.13|mRNA|ELOVL5|ENSG00000012660.13|ENSG00000012660.13|0|3813	13	266.615
hsa_circ_0081750|circRNA|hsa_circ_0081750|hsa_circ_0081750|hsa_circ_0081750|0|600	13	266.769
ENSG00000272980.4|lncRNA|Z94721.2|ENSG00000272980.4|ENSG00000272980.4|0|5310	13	268.385
hsa_circ_0013532|circRNA|hsa_circ_0013532|hsa_circ_0013532|hsa_circ_0013532|0|600	13	268.769
ENSG00000229117.8|mRNA|RPL41|ENSG00000229117.8|ENSG00000229117.8|0|1088	13	270.385
hsa_circ_0057042|circRNA|hsa_circ_0057042|hsa_circ_0057042|hsa_circ_0057042|0|600	13	272.462
ENSG00000141564.13|mRNA|RPTOR|ENSG00000141564.13|ENSG00000141564.13|0|9389	13	274.077
ENSG00000010322.15|mRNA|NISCH|ENSG00000010322.15|ENSG00000010322.15|0|9161	13	275.462
hsa_circ_0086732|circRNA|hsa_circ_0086732|hsa_circ_0086732|hsa_circ_0086732|0|600	13	276.462
ENSG00000205176.3|pseudogene|REXO1L1P|ENSG00000205176.3|ENSG00000205176.3|0|7056	13	276.462
ENSG00000105492.15|mRNA|SIGLEC6|ENSG00000105492.15|ENSG00000105492.15|0|2573	13	277.385
hsa_circ_0018558|circRNA|hsa_circ_0018558|hsa_circ_0018558|hsa_circ_0018558|0|600	13	277.846
hsa_circ_0005126|circRNA|hsa_circ_0005126|hsa_circ_0005126|hsa_circ_0005126|0|586	13	280.077
hsa_circ_0047552|circRNA|hsa_circ_0047552|hsa_circ_0047552|hsa_circ_0047552|0|600	13	280.231
hsa_circ_0042819|circRNA|hsa_circ_0042819|hsa_circ_0042819|hsa_circ_0042819|0|600	13	282.308
hsa_circ_0002015|circRNA|hsa_circ_0002015|hsa_circ_0002015|hsa_circ_0002015|0|344	13	282.769
hsa_circ_0029308|circRNA|hsa_circ_0029308|hsa_circ_0029308|hsa_circ_0029308|0|600	13	282.769
hsa_circ_0000821|circRNA|hsa_circ_0000821|hsa_circ_0000821|hsa_circ_0000821|0|600	13	286.154
ENSG00000178184.15|mRNA|PARD6G|ENSG00000178184.15|ENSG00000178184.15|0|4224	13	288.231
hsa_circ_0019007|circRNA|hsa_circ_0019007|hsa_circ_0019007|hsa_circ_0019007|0|600	13	288.308
ENSG00000177508.11|mRNA|IRX3|ENSG00000177508.11|ENSG00000177508.11|0|2911	13	288.692
hsa_circ_0031441|circRNA|hsa_circ_0031441|hsa_circ_0031441|hsa_circ_0031441|0|600	13	291.231
hsa_circ_0008753|circRNA|hsa_circ_0008753|hsa_circ_0008753|hsa_circ_0008753|0|542	13	294.231
ENSG00000149823.8|mRNA|VPS51|ENSG00000149823.8|ENSG00000149823.8|0|4878	13	295
ENSG00000131061.13|mRNA|ZNF341|ENSG00000131061.13|ENSG00000131061.13|0|5457	13	295.692
ENSG00000168071.21|mRNA|CCDC88B|ENSG00000168071.21|ENSG00000168071.21|0|8331	13	295.846
hsa_circ_0001017|circRNA|hsa_circ_0001017|hsa_circ_0001017|hsa_circ_0001017|0|600	13	298
ENSG00000064607.16|mRNA|SUGP2|ENSG00000064607.16|ENSG00000064607.16|0|8468	13	299.231
ENSG00000184967.6|mRNA|NOC4L|ENSG00000184967.6|ENSG00000184967.6|0|2029	13	300
hsa_circ_0025544|circRNA|hsa_circ_0025544|hsa_circ_0025544|hsa_circ_0025544|0|600	13	300
hsa_circ_0000640|circRNA|hsa_circ_0000640|hsa_circ_0000640|hsa_circ_0000640|0|598	13	300.231
ENSG00000111266.8|mRNA|DUSP16|ENSG00000111266.8|ENSG00000111266.8|0|5724	13	301.231
ENSG00000105323.16|mRNA|HNRNPUL1|ENSG00000105323.16|ENSG00000105323.16|0|6543	13	312.385
ENSG00000090339.8|mRNA|ICAM1|ENSG00000090339.8|ENSG00000090339.8|0|3706	13	313.154
ENSG00000106853.18|mRNA|PTGR1|ENSG00000106853.18|ENSG00000106853.18|0|3722	13	316
ENSG00000179010.14|mRNA|MRFAP1|ENSG00000179010.14|ENSG00000179010.14|0|2655	13	317.462
ENSG00000250312.6|mRNA|ZNF718|ENSG00000250312.6|ENSG00000250312.6|0|4118	13	318.308
hsa_circ_0036713|circRNA|hsa_circ_0036713|hsa_circ_0036713|hsa_circ_0036713|0|558	13	325.385
ENSG00000022567.9|mRNA|SLC45A4|ENSG00000022567.9|ENSG00000022567.9|0|8608	13	327.538
ENSG00000181027.10|mRNA|FKRP|ENSG00000181027.10|ENSG00000181027.10|0|5081	13	329.692
hsa_circ_0083059|circRNA|hsa_circ_0083059|hsa_circ_0083059|hsa_circ_0083059|0|600	13	329.923
hsa_circ_0001573|circRNA|hsa_circ_0001573|hsa_circ_0001573|hsa_circ_0001573|0|600	13	330.615
ENSG00000106153.12|mRNA|CHCHD2|ENSG00000106153.12|ENSG00000106153.12|0|1132	13	332.308
ENSG00000167220.11|mRNA|HDHD2|ENSG00000167220.11|ENSG00000167220.11|0|4704	13	334.769
ENSG00000213347.10|mRNA|MXD3|ENSG00000213347.10|ENSG00000213347.10|0|5154	13	338
ENSG00000284194.1|mRNA|SCO2|ENSG00000284194.1|ENSG00000284194.1|0|1196	13	339.231
ENSG00000151718.15|mRNA|WWC2|ENSG00000151718.15|ENSG00000151718.15|0|9966	13	342.385
ENSG00000169914.5|mRNA|OTUD3|ENSG00000169914.5|ENSG00000169914.5|0|6767	13	342.615
ENSG00000132965.9|mRNA|ALOX5AP|ENSG00000132965.9|ENSG00000132965.9|0|1715	13	352.462
ENSG00000107651.12|mRNA|SEC23IP|ENSG00000107651.12|ENSG00000107651.12|0|7867	13	357
hsa_circ_0054186|circRNA|hsa_circ_0054186|hsa_circ_0054186|hsa_circ_0054186|0|324	13	360.923
ENSG00000251474.6|pseudogene|RPL32P3|ENSG00000251474.6|ENSG00000251474.6|0|4504	12	128.667
ENSG00000165792.17|mRNA|METTL17|ENSG00000165792.17|ENSG00000165792.17|0|4449	12	160.083
ENSG00000261487.1|lncRNA|AC135048.1|ENSG00000261487.1|ENSG00000261487.1|0|1630	12	165.25
ENSG00000197217.12|mRNA|ENTPD4|ENSG00000197217.12|ENSG00000197217.12|0|7064	12	165.75
ENSG00000127419.16|mRNA|TMEM175|ENSG00000127419.16|ENSG00000127419.16|0|3623	12	184.25
hsa_circ_0077304|circRNA|hsa_circ_0077304|hsa_circ_0077304|hsa_circ_0077304|0|600	12	196.583
ENSG00000099949.18|mRNA|LZTR1|ENSG00000099949.18|ENSG00000099949.18|0|7556	12	203.333
ENSG00000163950.12|mRNA|SLBP|ENSG00000163950.12|ENSG00000163950.12|0|2026	12	210.583
hsa_circ_0021786|circRNA|hsa_circ_0021786|hsa_circ_0021786|hsa_circ_0021786|0|586	12	212.75
ENSG00000103254.9|mRNA|FAM173A|ENSG00000103254.9|ENSG00000103254.9|0|1923	12	213
hsa_circ_0023903|circRNA|hsa_circ_0023903|hsa_circ_0023903|hsa_circ_0023903|0|600	12	216.583
hsa_circ_0005189|circRNA|hsa_circ_0005189|hsa_circ_0005189|hsa_circ_0005189|0|600	12	219.25
ENSG00000169710.8|mRNA|FASN|ENSG00000169710.8|ENSG00000169710.8|0|9364	12	221.417
hsa_circ_0006215|circRNA|hsa_circ_0006215|hsa_circ_0006215|hsa_circ_0006215|0|572	12	222.25
ENSG00000117115.12|mRNA|PADI2|ENSG00000117115.12|ENSG00000117115.12|0|5984	12	222.583
ENSG00000168710.17|mRNA|AHCYL1|ENSG00000168710.17|ENSG00000168710.17|0|5113	12	222.833
hsa_circ_0070964|circRNA|hsa_circ_0070964|hsa_circ_0070964|hsa_circ_0070964|0|518	12	223.667
hsa_circ_0070194|circRNA|hsa_circ_0070194|hsa_circ_0070194|hsa_circ_0070194|0|600	12	224.917
ENSG00000144224.16|mRNA|UBXN4|ENSG00000144224.16|ENSG00000144224.16|0|5112	12	229.333
ENSG00000010327.10|mRNA|STAB1|ENSG00000010327.10|ENSG00000010327.10|0|10588	12	229.833
ENSG00000119927.13|mRNA|GPAM|ENSG00000119927.13|ENSG00000119927.13|0|9808	12	235.75
ENSG00000257727.5|mRNA|CNPY2|ENSG00000257727.5|ENSG00000257727.5|0|2956	12	238.833
hsa_circ_0043196|circRNA|hsa_circ_0043196|hsa_circ_0043196|hsa_circ_0043196|0|390	12	238.833
ENSG00000207039.1|Y_RNA|Y_RNA|ENSG00000207039.1|ENSG00000207039.1|0|102	12	239
hsa_circ_0023891|circRNA|hsa_circ_0023891|hsa_circ_0023891|hsa_circ_0023891|0|600	12	239.417
ENSG00000183576.12|mRNA|SETD3|ENSG00000183576.12|ENSG00000183576.12|0|5188	12	239.583
ENSG00000167470.12|mRNA|MIDN|ENSG00000167470.12|ENSG00000167470.12|0|4492	12	240.083
ENSG00000220804.8|pseudogene|LINC01881|ENSG00000220804.8|ENSG00000220804.8|0|1931	12	242.167
hsa_circ_0006896|circRNA|hsa_circ_0006896|hsa_circ_0006896|hsa_circ_0006896|0|272	12	243.083
ENSG00000130589.16|mRNA|HELZ2|ENSG00000130589.16|ENSG00000130589.16|0|12066	12	248.583
ENSG00000179639.10|mRNA|FCER1A|ENSG00000179639.10|ENSG00000179639.10|0|1165	12	249.417
ENSG00000163466.15|mRNA|ARPC2|ENSG00000163466.15|ENSG00000163466.15|0|6562	12	250.333
ENSG00000279058.2|pseudogene|AGAP14|ENSG00000279058.2|ENSG00000279058.2|0|2060	12	251.417
hsa_circ_0042492|circRNA|hsa_circ_0042492|hsa_circ_0042492|hsa_circ_0042492|0|538	12	253.083
hsa_circ_0010523|circRNA|hsa_circ_0010523|hsa_circ_0010523|hsa_circ_0010523|0|600	12	254.667
ENSG00000102897.9|mRNA|LYRM1|ENSG00000102897.9|ENSG00000102897.9|0|3593	12	255.667
ENSG00000175220.11|mRNA|ARHGAP1|ENSG00000175220.11|ENSG00000175220.11|0|6138	12	255.833
ENSG00000090554.12|mRNA|FLT3LG|ENSG00000090554.12|ENSG00000090554.12|0|2846	12	257.917
ENSG00000196535.15|mRNA|MYO18A|ENSG00000196535.15|ENSG00000196535.15|0|15047	12	258.5
hsa_circ_0000002|circRNA|hsa_circ_0000002|hsa_circ_0000002|hsa_circ_0000002|0|502	12	259.583
hsa_circ_0001875|circRNA|hsa_circ_0001875|hsa_circ_0001875|hsa_circ_0001875|0|600	12	264
ENSG00000198171.12|mRNA|DDRGK1|ENSG00000198171.12|ENSG00000198171.12|0|1832	12	264.667
hsa_circ_0073119|circRNA|hsa_circ_0073119|hsa_circ_0073119|hsa_circ_0073119|0|600	12	265.083
hsa_circ_0077099|circRNA|hsa_circ_0077099|hsa_circ_0077099|hsa_circ_0077099|0|386	12	267.667
hsa_circ_0008239|circRNA|hsa_circ_0008239|hsa_circ_0008239|hsa_circ_0008239|0|600	12	268.5
ENSG00000125995.15|mRNA|ROMO1|ENSG00000125995.15|ENSG00000125995.15|0|702	12	268.667
ENSG00000100453.12|mRNA|GZMB|ENSG00000100453.12|ENSG00000100453.12|0|1411	12	269
hsa_circ_0071580|circRNA|hsa_circ_0071580|hsa_circ_0071580|hsa_circ_0071580|0|502	12	269.417
ENSG00000277125.1|pseudogene|AC211476.4|ENSG00000277125.1|ENSG00000277125.1|0|699	12	269.667
ENSG00000186073.11|mRNA|C15orf41|ENSG00000186073.11|ENSG00000186073.11|0|9009	12	269.667
ENSG00000085063.14|mRNA|CD59|ENSG00000085063.14|ENSG00000085063.14|0|4942	12	271.417
hsa_circ_0007462|circRNA|hsa_circ_0007462|hsa_circ_0007462|hsa_circ_0007462|0|362	12	275.75
hsa_circ_0002665|circRNA|hsa_circ_0002665|hsa_circ_0002665|hsa_circ_0002665|0|600	12	278.75
ENSG00000076770.14|mRNA|MBNL3|ENSG00000076770.14|ENSG00000076770.14|0|12199	12	278.833
ENSG00000138119.16|mRNA|MYOF|ENSG00000138119.16|ENSG00000138119.16|0|8473	12	279.75
ENSG00000245164.6|lncRNA|LINC00861|ENSG00000245164.6|ENSG00000245164.6|0|5724	12	282.167
hsa_circ_0024836|circRNA|hsa_circ_0024836|hsa_circ_0024836|hsa_circ_0024836|0|480	12	284.167
ENSG00000166228.8|mRNA|PCBD1|ENSG00000166228.8|ENSG00000166228.8|0|1614	12	285.667
ENSG00000206190.11|mRNA|ATP10A|ENSG00000206190.11|ENSG00000206190.11|0|8409	12	286
hsa_circ_0001969|circRNA|hsa_circ_0001969|hsa_circ_0001969|hsa_circ_0001969|0|408	12	286.25
ENSG00000123485.11|mRNA|HJURP|ENSG00000123485.11|ENSG00000123485.11|0|3821	12	287.667
hsa_circ_0087633|circRNA|hsa_circ_0087633|hsa_circ_0087633|hsa_circ_0087633|0|600	12	289.833
ENSG00000109065.11|mRNA|NAT9|ENSG00000109065.11|ENSG00000109065.11|0|4049	12	292.167
ENSG00000100554.11|mRNA|ATP6V1D|ENSG00000100554.11|ENSG00000100554.11|0|4251	12	292.167
ENSG00000154370.15|mRNA|TRIM11|ENSG00000154370.15|ENSG00000154370.15|0|8493	12	292.25
hsa_circ_0003647|circRNA|hsa_circ_0003647|hsa_circ_0003647|hsa_circ_0003647|0|600	12	294.333
hsa_circ_0056666|circRNA|hsa_circ_0056666|hsa_circ_0056666|hsa_circ_0056666|0|600	12	295.25
ENSG00000116747.12|mRNA|TROVE2|ENSG00000116747.12|ENSG00000116747.12|0|9102	12	300.75
hsa_circ_0001110|circRNA|hsa_circ_0001110|hsa_circ_0001110|hsa_circ_0001110|0|600	12	301.917
ENSG00000129757.12|mRNA|CDKN1C|ENSG00000129757.12|ENSG00000129757.12|0|2586	12	305.75
hsa_circ_0029833|circRNA|hsa_circ_0029833|hsa_circ_0029833|hsa_circ_0029833|0|378	12	311.583
ENSG00000072778.19|mRNA|ACADVL|ENSG00000072778.19|ENSG00000072778.19|0|4865	12	312.833
ENSG00000162598.13|mRNA|C1orf87|ENSG00000162598.13|ENSG00000162598.13|0|4422	12	313.583
ENSG00000198176.12|mRNA|TFDP1|ENSG00000198176.12|ENSG00000198176.12|0|3741	12	313.75
ENSG00000160803.7|mRNA|UBQLN4|ENSG00000160803.7|ENSG00000160803.7|0|3878	12	314.167
hsa_circ_0043282|circRNA|hsa_circ_0043282|hsa_circ_0043282|hsa_circ_0043282|0|600	12	314.833
ENSG00000232347.1|lncRNA|AL390728.5|ENSG00000232347.1|ENSG00000232347.1|0|706	12	316.5
ENSG00000215440.11|mRNA|NPEPL1|ENSG00000215440.11|ENSG00000215440.11|0|7641	12	317.583
ENSG00000137509.10|mRNA|PRCP|ENSG00000137509.10|ENSG00000137509.10|0|12798	12	317.75
ENSG00000175550.7|mRNA|DRAP1|ENSG00000175550.7|ENSG00000175550.7|0|1737	12	317.917
ENSG00000228506.1|lncRNA|AL513550.1|ENSG00000228506.1|ENSG00000228506.1|0|1638	12	318.083
ENSG00000120438.11|mRNA|TCP1|ENSG00000120438.11|ENSG00000120438.11|0|4929	12	318.417
hsa_circ_0010450|circRNA|hsa_circ_0010450|hsa_circ_0010450|hsa_circ_0010450|0|458	12	321.417
ENSG00000008438.4|mRNA|PGLYRP1|ENSG00000008438.4|ENSG00000008438.4|0|720	12	324.333
ENSG00000173744.17|mRNA|AGFG1|ENSG00000173744.17|ENSG00000173744.17|0|9321	12	330.167
ENSG00000101868.10|mRNA|POLA1|ENSG00000101868.10|ENSG00000101868.10|0|6336	12	330.833
ENSG00000128833.12|mRNA|MYO5C|ENSG00000128833.12|ENSG00000128833.12|0|10045	12	333.5
hsa_circ_0075677|circRNA|hsa_circ_0075677|hsa_circ_0075677|hsa_circ_0075677|0|354	12	339.167
ENSG00000262879.5|lncRNA|AC068152.1|ENSG00000262879.5|ENSG00000262879.5|0|3348	12	339.75
hsa_circ_0026150|circRNA|hsa_circ_0026150|hsa_circ_0026150|hsa_circ_0026150|0|600	12	349.667
ENSG00000196369.11|mRNA|SRGAP2B|ENSG00000196369.11|ENSG00000196369.11|0|7230	12	350.417
hsa_circ_0000424|circRNA|hsa_circ_0000424|hsa_circ_0000424|hsa_circ_0000424|0|600	12	362.833
ENSG00000171862.10|mRNA|PTEN|ENSG00000171862.10|ENSG00000171862.10|0|11581	12	368.667
ENSG00000143641.9|mRNA|GALNT2|ENSG00000143641.9|ENSG00000143641.9|0|7743	12	402.167
ENSG00000142627.12|mRNA|EPHA2|ENSG00000142627.12|ENSG00000142627.12|0|4159	11	86.7273
ENSG00000095564.13|mRNA|BTAF1|ENSG00000095564.13|ENSG00000095564.13|0|7582	11	157.727
ENSG00000254415.3|mRNA|SIGLEC14|ENSG00000254415.3|ENSG00000254415.3|0|2082	11	169.455
ENSG00000139579.12|mRNA|NABP2|ENSG00000139579.12|ENSG00000139579.12|0|2218	11	169.545
ENSG00000159202.17|mRNA|UBE2Z|ENSG00000159202.17|ENSG00000159202.17|0|5753	11	181.091
ENSG00000101935.9|mRNA|AMMECR1|ENSG00000101935.9|ENSG00000101935.9|0|6516	11	181.545
hsa_circ_0028417|circRNA|hsa_circ_0028417|hsa_circ_0028417|hsa_circ_0028417|0|600	11	182
ENSG00000130203.9|mRNA|APOE|ENSG00000130203.9|ENSG00000130203.9|0|2191	11	182.273
ENSG00000196365.11|mRNA|LONP1|ENSG00000196365.11|ENSG00000196365.11|0|5085	11	197.364
ENSG00000278540.4|mRNA|ACACA|ENSG00000278540.4|ENSG00000278540.4|0|13008	11	201.273
hsa_circ_0005238|circRNA|hsa_circ_0005238|hsa_circ_0005238|hsa_circ_0005238|0|600	11	202.545
ENSG00000136960.12|mRNA|ENPP2|ENSG00000136960.12|ENSG00000136960.12|0|6729	11	203.273
ENSG00000177868.11|mRNA|SVBP|ENSG00000177868.11|ENSG00000177868.11|0|1208	11	206.091
ENSG00000159322.17|mRNA|ADPGK|ENSG00000159322.17|ENSG00000159322.17|0|5931	11	206.455
hsa_circ_0006523|circRNA|hsa_circ_0006523|hsa_circ_0006523|hsa_circ_0006523|0|600	11	207.727
ENSG00000167702.11|mRNA|KIFC2|ENSG00000167702.11|ENSG00000167702.11|0|4447	11	217
ENSG00000259029.1|pseudogene|DUX4L18|ENSG00000259029.1|ENSG00000259029.1|0|1267	11	219.091
hsa_circ_0039676|circRNA|hsa_circ_0039676|hsa_circ_0039676|hsa_circ_0039676|0|600	11	221.091
hsa_circ_0002227|circRNA|hsa_circ_0002227|hsa_circ_0002227|hsa_circ_0002227|0|600	11	221.545
hsa_circ_0035384|circRNA|hsa_circ_0035384|hsa_circ_0035384|hsa_circ_0035384|0|558	11	222.455
hsa_circ_0083861|circRNA|hsa_circ_0083861|hsa_circ_0083861|hsa_circ_0083861|0|406	11	225
ENSG00000113161.15|mRNA|HMGCR|ENSG00000113161.15|ENSG00000113161.15|0|6215	11	226.182
hsa_circ_0019607|circRNA|hsa_circ_0019607|hsa_circ_0019607|hsa_circ_0019607|0|600	11	239.364
ENSG00000005700.14|mRNA|IBTK|ENSG00000005700.14|ENSG00000005700.14|0|8722	11	239.818
ENSG00000125648.14|mRNA|SLC25A23|ENSG00000125648.14|ENSG00000125648.14|0|4859	11	240.545
ENSG00000101294.16|mRNA|HM13|ENSG00000101294.16|ENSG00000101294.16|0|10000	11	243.182
hsa_circ_0065145|circRNA|hsa_circ_0065145|hsa_circ_0065145|hsa_circ_0065145|0|600	11	243.455
hsa_circ_0018047|circRNA|hsa_circ_0018047|hsa_circ_0018047|hsa_circ_0018047|0|600	11	247
ENSG00000158006.13|mRNA|PAFAH2|ENSG00000158006.13|ENSG00000158006.13|0|3835	11	248.455
ENSG00000139641.12|mRNA|ESYT1|ENSG00000139641.12|ENSG00000139641.12|0|5493	11	249.455
ENSG00000166887.15|mRNA|VPS39|ENSG00000166887.15|ENSG00000166887.15|0|8354	11	249.455
hsa_circ_0083014|circRNA|hsa_circ_0083014|hsa_circ_0083014|hsa_circ_0083014|0|498	11	249.909
ENSG00000164935.6|mRNA|DCSTAMP|ENSG00000164935.6|ENSG00000164935.6|0|2778	11	250.182
ENSG00000072849.10|mRNA|DERL2|ENSG00000072849.10|ENSG00000072849.10|0|6386	11	252.273
hsa_circ_0015132|circRNA|hsa_circ_0015132|hsa_circ_0015132|hsa_circ_0015132|0|600	11	254.727
ENSG00000197712.11|mRNA|FAM114A1|ENSG00000197712.11|ENSG00000197712.11|0|4871	11	254.727
hsa_circ_0008571|circRNA|hsa_circ_0008571|hsa_circ_0008571|hsa_circ_0008571|0|600	11	255.818
ENSG00000143622.10|mRNA|RIT1|ENSG00000143622.10|ENSG00000143622.10|0|3919	11	256.909
ENSG00000103657.13|mRNA|HERC1|ENSG00000103657.13|ENSG00000103657.13|0|17053	11	257.091
ENSG00000125457.13|mRNA|MIF4GD|ENSG00000125457.13|ENSG00000125457.13|0|2283	11	257.545
hsa_circ_0023755|circRNA|hsa_circ_0023755|hsa_circ_0023755|hsa_circ_0023755|0|288	11	259.636
hsa_circ_0047478|circRNA|hsa_circ_0047478|hsa_circ_0047478|hsa_circ_0047478|0|582	11	260.091
hsa_circ_0007986|circRNA|hsa_circ_0007986|hsa_circ_0007986|hsa_circ_0007986|0|600	11	260.364
ENSG00000133657.14|mRNA|ATP13A3|ENSG00000133657.14|ENSG00000133657.14|0|11864	11	260.818
hsa_circ_0008790|circRNA|hsa_circ_0008790|hsa_circ_0008790|hsa_circ_0008790|0|600	11	262.545
ENSG00000009307.15|mRNA|CSDE1|ENSG00000009307.15|ENSG00000009307.15|0|5778	11	263.091
ENSG00000162613.16|mRNA|FUBP1|ENSG00000162613.16|ENSG00000162613.16|0|5666	11	263.182
ENSG00000276293.4|mRNA|PIP4K2B|ENSG00000276293.4|ENSG00000276293.4|0|6135	11	263.273
hsa_circ_0087357|circRNA|hsa_circ_0087357|hsa_circ_0087357|hsa_circ_0087357|0|600	11	263.455
hsa_circ_0036377|circRNA|hsa_circ_0036377|hsa_circ_0036377|hsa_circ_0036377|0|600	11	264.455
ENSG00000177311.11|mRNA|ZBTB38|ENSG00000177311.11|ENSG00000177311.11|0|14243	11	266.182
ENSG00000173209.22|mRNA|AHSA2|ENSG00000173209.22|ENSG00000173209.22|0|8382	11	266.273
ENSG00000184988.8|mRNA|TMEM106A|ENSG00000184988.8|ENSG00000184988.8|0|3577	11	266.545
ENSG00000115947.13|mRNA|ORC4|ENSG00000115947.13|ENSG00000115947.13|0|8915	11	268.455
ENSG00000181896.11|mRNA|ZNF101|ENSG00000181896.11|ENSG00000181896.11|0|6560	11	271.091
ENSG00000105483.17|mRNA|CARD8|ENSG00000105483.17|ENSG00000105483.17|0|12912	11	271.182
hsa_circ_0071106|circRNA|hsa_circ_0071106|hsa_circ_0071106|hsa_circ_0071106|0|600	11	273.636
hsa_circ_0000504|circRNA|hsa_circ_0000504|hsa_circ_0000504|hsa_circ_0000504|0|600	11	278.636
ENSG00000070882.12|mRNA|OSBPL3|ENSG00000070882.12|ENSG00000070882.12|0|8100	11	278.818
ENSG00000100241.20|mRNA|SBF1|ENSG00000100241.20|ENSG00000100241.20|0|9441	11	279.091
ENSG00000157873.17|mRNA|TNFRSF14|ENSG00000157873.17|ENSG00000157873.17|0|6219	11	279.273
hsa_circ_0083974|circRNA|hsa_circ_0083974|hsa_circ_0083974|hsa_circ_0083974|0|600	11	279.455
ENSG00000103479.15|mRNA|RBL2|ENSG00000103479.15|ENSG00000103479.15|0|7320	11	280.818
ENSG00000197256.10|mRNA|KANK2|ENSG00000197256.10|ENSG00000197256.10|0|7638	11	282.273
ENSG00000088247.17|mRNA|KHSRP|ENSG00000088247.17|ENSG00000088247.17|0|4563	11	282.364
ENSG00000166452.11|mRNA|AKIP1|ENSG00000166452.11|ENSG00000166452.11|0|2300	11	282.818
ENSG00000259781.1|pseudogene|HMGB1P6|ENSG00000259781.1|ENSG00000259781.1|0|646	11	284.545
ENSG00000064726.9|mRNA|BTBD1|ENSG00000064726.9|ENSG00000064726.9|0|4169	11	288.727
ENSG00000213931.5|mRNA|HBE1|ENSG00000213931.5|ENSG00000213931.5|0|928	11	291
ENSG00000188643.10|mRNA|S100A16|ENSG00000188643.10|ENSG00000188643.10|0|1701	11	291.455
ENSG00000213614.9|mRNA|HEXA|ENSG00000213614.9|ENSG00000213614.9|0|12611	11	295.364
ENSG00000072518.20|mRNA|MARK2|ENSG00000072518.20|ENSG00000072518.20|0|6154	11	295.455
ENSG00000054282.15|mRNA|SDCCAG8|ENSG00000054282.15|ENSG00000054282.15|0|5322	11	296.727
hsa_circ_0005096|circRNA|hsa_circ_0005096|hsa_circ_0005096|hsa_circ_0005096|0|458	11	299.909
hsa_circ_0006316|circRNA|hsa_circ_0006316|hsa_circ_0006316|hsa_circ_0006316|0|342	11	301.182
ENSG00000170345.9|mRNA|FOS|ENSG00000170345.9|ENSG00000170345.9|0|3238	11	301.727
hsa_circ_0015779|circRNA|hsa_circ_0015779|hsa_circ_0015779|hsa_circ_0015779|0|600	11	302.182
hsa_circ_0027353|circRNA|hsa_circ_0027353|hsa_circ_0027353|hsa_circ_0027353|0|600	11	303.727
ENSG00000269469.1|mRNA|AC010619.1|ENSG00000269469.1|ENSG00000269469.1|0|675	11	304
hsa_circ_0002597|circRNA|hsa_circ_0002597|hsa_circ_0002597|hsa_circ_0002597|0|554	11	306.273
ENSG00000108679.12|mRNA|LGALS3BP|ENSG00000108679.12|ENSG00000108679.12|0|3584	11	308.364
ENSG00000040933.15|mRNA|INPP4A|ENSG00000040933.15|ENSG00000040933.15|0|13187	11	310.273
ENSG00000160185.14|mRNA|UBASH3A|ENSG00000160185.14|ENSG00000160185.14|0|3915	11	311.273
ENSG00000115561.15|mRNA|CHMP3|ENSG00000115561.15|ENSG00000115561.15|0|7018	11	312.818
ENSG00000117036.11|mRNA|ETV3|ENSG00000117036.11|ENSG00000117036.11|0|6707	11	312.909
hsa_circ_0023051|circRNA|hsa_circ_0023051|hsa_circ_0023051|hsa_circ_0023051|0|600	11	317.364
ENSG00000144306.14|mRNA|SCRN3|ENSG00000144306.14|ENSG00000144306.14|0|4144	11	318.273
ENSG00000084070.11|mRNA|SMAP2|ENSG00000084070.11|ENSG00000084070.11|0|3631	11	319.182
ENSG00000198520.10|mRNA|C1orf228|ENSG00000198520.10|ENSG00000198520.10|0|3166	11	319.273
ENSG00000106610.14|pseudogene|STAG3L4|ENSG00000106610.14|ENSG00000106610.14|0|2501	11	320.727
hsa_circ_0029935|circRNA|hsa_circ_0029935|hsa_circ_0029935|hsa_circ_0029935|0|600	11	321.455
ENSG00000104856.13|mRNA|RELB|ENSG00000104856.13|ENSG00000104856.13|0|3035	11	322.091
ENSG00000204267.13|mRNA|TAP2|ENSG00000204267.13|ENSG00000204267.13|0|6390	11	325.818
hsa_circ_0006237|circRNA|hsa_circ_0006237|hsa_circ_0006237|hsa_circ_0006237|0|468	11	327.545
hsa_circ_0008342|circRNA|hsa_circ_0008342|hsa_circ_0008342|hsa_circ_0008342|0|600	11	329.727
ENSG00000247092.6|lncRNA|SNHG10|ENSG00000247092.6|ENSG00000247092.6|0|1945	11	329.818
hsa_circ_0072202|circRNA|hsa_circ_0072202|hsa_circ_0072202|hsa_circ_0072202|0|430	11	337.091
ENSG00000104973.16|mRNA|MED25|ENSG00000104973.16|ENSG00000104973.16|0|6120	11	337.818
ENSG00000283761.1|mRNA|AC118553.2|ENSG00000283761.1|ENSG00000283761.1|0|5765	11	340.727
hsa_circ_0049862|circRNA|hsa_circ_0049862|hsa_circ_0049862|hsa_circ_0049862|0|600	11	341.909
hsa_circ_0056558|circRNA|hsa_circ_0056558|hsa_circ_0056558|hsa_circ_0056558|0|600	11	354
hsa_circ_0004592|circRNA|hsa_circ_0004592|hsa_circ_0004592|hsa_circ_0004592|0|600	11	357.727
ENSG00000224046.1|lncRNA|AC005076.1|ENSG00000224046.1|ENSG00000224046.1|0|888	11	362.727
ENSG00000166181.12|mRNA|API5|ENSG00000166181.12|ENSG00000166181.12|0|4651	11	368.273
ENSG00000185219.16|mRNA|ZNF445|ENSG00000185219.16|ENSG00000185219.16|0|18871	11	370.091
ENSG00000140678.16|mRNA|ITGAX|ENSG00000140678.16|ENSG00000140678.16|0|7074	11	373
hsa_circ_0003512|circRNA|hsa_circ_0003512|hsa_circ_0003512|hsa_circ_0003512|0|552	11	379.636
ENSG00000169429.10|mRNA|CXCL8|ENSG00000169429.10|ENSG00000169429.10|0|2274	11	393.182
ENSG00000224916.9|mRNA|APOC4-APOC2|ENSG00000224916.9|ENSG00000224916.9|0|1829	10	110.6
ENSG00000067048.16|mRNA|DDX3Y|ENSG00000067048.16|ENSG00000067048.16|0|5738	10	124.8
ENSG00000164828.17|mRNA|SUN1|ENSG00000164828.17|ENSG00000164828.17|0|11811	10	160.6
ENSG00000105251.10|mRNA|SHD|ENSG00000105251.10|ENSG00000105251.10|0|2811	10	164.8
ENSG00000139192.11|mRNA|TAPBPL|ENSG00000139192.11|ENSG00000139192.11|0|3188	10	165.1
ENSG00000261794.1|mRNA|GOLGA8H|ENSG00000261794.1|ENSG00000261794.1|0|1899	10	167.7
ENSG00000196850.5|mRNA|PPTC7|ENSG00000196850.5|ENSG00000196850.5|0|5687	10	176
hsa_circ_0090933|circRNA|hsa_circ_0090933|hsa_circ_0090933|hsa_circ_0090933|0|338	10	187.1
hsa_circ_0036252|circRNA|hsa_circ_0036252|hsa_circ_0036252|hsa_circ_0036252|0|534	10	199.1
hsa_circ_0006716|circRNA|hsa_circ_0006716|hsa_circ_0006716|hsa_circ_0006716|0|432	10	199.7
ENSG00000106733.20|mRNA|NMRK1|ENSG00000106733.20|ENSG00000106733.20|0|3865	10	203.2
ENSG00000159063.12|mRNA|ALG8|ENSG00000159063.12|ENSG00000159063.12|0|3448	10	206.2
hsa_circ_0003917|circRNA|hsa_circ_0003917|hsa_circ_0003917|hsa_circ_0003917|0|416	10	206.6
ENSG00000282458.1|pseudogene|WASH5P|ENSG00000282458.1|ENSG00000282458.1|0|6331	10	207.3
ENSG00000100242.15|mRNA|SUN2|ENSG00000100242.15|ENSG00000100242.15|0|6489	10	209.9
ENSG00000104852.14|mRNA|SNRNP70|ENSG00000104852.14|ENSG00000104852.14|0|4684	10	215
ENSG00000113615.12|mRNA|SEC24A|ENSG00000113615.12|ENSG00000113615.12|0|7201	10	219.3
ENSG00000138593.8|mRNA|SECISBP2L|ENSG00000138593.8|ENSG00000138593.8|0|8699	10	222.7
hsa_circ_0047378|circRNA|hsa_circ_0047378|hsa_circ_0047378|hsa_circ_0047378|0|600	10	223.7
hsa_circ_0011122|circRNA|hsa_circ_0011122|hsa_circ_0011122|hsa_circ_0011122|0|294	10	229.1
hsa_circ_0018553|circRNA|hsa_circ_0018553|hsa_circ_0018553|hsa_circ_0018553|0|600	10	229.2
ENSG00000009335.17|mRNA|UBE3C|ENSG00000009335.17|ENSG00000009335.17|0|9220	10	231.4
hsa_circ_0003713|circRNA|hsa_circ_0003713|hsa_circ_0003713|hsa_circ_0003713|0|492	10	231.9
ENSG00000140044.12|mRNA|JDP2|ENSG00000140044.12|ENSG00000140044.12|0|6235	10	233.9
ENSG00000169871.12|mRNA|TRIM56|ENSG00000169871.12|ENSG00000169871.12|0|11173	10	234
ENSG00000204305.13|mRNA|AGER|ENSG00000204305.13|ENSG00000204305.13|0|2077	10	234.2
ENSG00000142188.16|mRNA|TMEM50B|ENSG00000142188.16|ENSG00000142188.16|0|4495	10	235.2
ENSG00000026297.15|mRNA|RNASET2|ENSG00000026297.15|ENSG00000026297.15|0|7643	10	235.5
ENSG00000004399.12|mRNA|PLXND1|ENSG00000004399.12|ENSG00000004399.12|0|9738	10	235.8
hsa_circ_0047104|circRNA|hsa_circ_0047104|hsa_circ_0047104|hsa_circ_0047104|0|600	10	236.6
ENSG00000184206.11|mRNA|GOLGA6L4|ENSG00000184206.11|ENSG00000184206.11|0|6065	10	237.2
ENSG00000131002.11|pseudogene|TXLNGY|ENSG00000131002.11|ENSG00000131002.11|0|11377	10	238.4
hsa_circ_0002863|circRNA|hsa_circ_0002863|hsa_circ_0002863|hsa_circ_0002863|0|600	10	239
hsa_circ_0001434|circRNA|hsa_circ_0001434|hsa_circ_0001434|hsa_circ_0001434|0|600	10	240.3
hsa_circ_0068131|circRNA|hsa_circ_0068131|hsa_circ_0068131|hsa_circ_0068131|0|600	10	241.2
ENSG00000180182.10|mRNA|MED14|ENSG00000180182.10|ENSG00000180182.10|0|9656	10	242.5
ENSG00000132424.14|mRNA|PNISR|ENSG00000132424.14|ENSG00000132424.14|0|10870	10	242.6
ENSG00000146587.17|mRNA|RBAK|ENSG00000146587.17|ENSG00000146587.17|0|6960	10	243.4
hsa_circ_0008857|circRNA|hsa_circ_0008857|hsa_circ_0008857|hsa_circ_0008857|0|600	10	244
ENSG00000163848.19|mRNA|ZNF148|ENSG00000163848.19|ENSG00000163848.19|0|10574	10	245.8
ENSG00000120051.14|mRNA|CFAP58|ENSG00000120051.14|ENSG00000120051.14|0|3548	10	249
ENSG00000121274.12|mRNA|PAPD5|ENSG00000121274.12|ENSG00000121274.12|0|8144	10	249.6
ENSG00000109861.15|mRNA|CTSC|ENSG00000109861.15|ENSG00000109861.15|0|11421	10	250.2
ENSG00000163221.8|mRNA|S100A12|ENSG00000163221.8|ENSG00000163221.8|0|518	10	250.9
ENSG00000184863.10|mRNA|RBM33|ENSG00000184863.10|ENSG00000184863.10|0|13132	10	253.6
hsa_circ_0008812|circRNA|hsa_circ_0008812|hsa_circ_0008812|hsa_circ_0008812|0|600	10	255.5
hsa_circ_0044832|circRNA|hsa_circ_0044832|hsa_circ_0044832|hsa_circ_0044832|0|540	10	255.7
hsa_circ_0038652|circRNA|hsa_circ_0038652|hsa_circ_0038652|hsa_circ_0038652|0|584	10	257.4
ENSG00000186787.8|mRNA|SPIN2B|ENSG00000186787.8|ENSG00000186787.8|0|1477	10	257.8
hsa_circ_0005037|circRNA|hsa_circ_0005037|hsa_circ_0005037|hsa_circ_0005037|0|580	10	258.8
ENSG00000117020.16|mRNA|AKT3|ENSG00000117020.16|ENSG00000117020.16|0|9475	10	259
hsa_circ_0005142|circRNA|hsa_circ_0005142|hsa_circ_0005142|hsa_circ_0005142|0|536	10	259.5
hsa_circ_0001424|circRNA|hsa_circ_0001424|hsa_circ_0001424|hsa_circ_0001424|0|600	10	259.5
ENSG00000171475.13|mRNA|WIPF2|ENSG00000171475.13|ENSG00000171475.13|0|8123	10	260.4
hsa_circ_0056936|circRNA|hsa_circ_0056936|hsa_circ_0056936|hsa_circ_0056936|0|600	10	260.7
ENSG00000116604.17|mRNA|MEF2D|ENSG00000116604.17|ENSG00000116604.17|0|6400	10	260.8
hsa_circ_0002138|circRNA|hsa_circ_0002138|hsa_circ_0002138|hsa_circ_0002138|0|600	10	260.8
ENSG00000168701.18|mRNA|TMEM208|ENSG00000168701.18|ENSG00000168701.18|0|1787	10	261.8
ENSG00000229308.1|lncRNA|AC010737.1|ENSG00000229308.1|ENSG00000229308.1|0|559	10	262.6
ENSG00000159884.11|mRNA|CCDC107|ENSG00000159884.11|ENSG00000159884.11|0|1459	10	262.6
hsa_circ_0031647|circRNA|hsa_circ_0031647|hsa_circ_0031647|hsa_circ_0031647|0|366	10	263.6
hsa_circ_0011765|circRNA|hsa_circ_0011765|hsa_circ_0011765|hsa_circ_0011765|0|436	10	263.9
ENSG00000161091.12|mRNA|MFSD12|ENSG00000161091.12|ENSG00000161091.12|0|5277	10	264
hsa_circ_0037900|circRNA|hsa_circ_0037900|hsa_circ_0037900|hsa_circ_0037900|0|600	10	264.3
hsa_circ_0030722|circRNA|hsa_circ_0030722|hsa_circ_0030722|hsa_circ_0030722|0|460	10	264.9
ENSG00000146426.17|mRNA|TIAM2|ENSG00000146426.17|ENSG00000146426.17|0|11532	10	265.3
ENSG00000106346.11|mRNA|USP42|ENSG00000106346.11|ENSG00000106346.11|0|7072	10	266.2
hsa_circ_0002496|circRNA|hsa_circ_0002496|hsa_circ_0002496|hsa_circ_0002496|0|598	10	269.6
ENSG00000196498.13|mRNA|NCOR2|ENSG00000196498.13|ENSG00000196498.13|0|13975	10	270.7
ENSG00000249839.1|pseudogene|AC011330.1|ENSG00000249839.1|ENSG00000249839.1|0|3235	10	270.7
ENSG00000104714.13|mRNA|ERICH1|ENSG00000104714.13|ENSG00000104714.13|0|9726	10	272
hsa_circ_0005052|circRNA|hsa_circ_0005052|hsa_circ_0005052|hsa_circ_0005052|0|600	10	272.2
ENSG00000174231.16|mRNA|PRPF8|ENSG00000174231.16|ENSG00000174231.16|0|11355	10	272.3
hsa_circ_0004259|circRNA|hsa_circ_0004259|hsa_circ_0004259|hsa_circ_0004259|0|600	10	274.4
ENSG00000136636.12|mRNA|KCTD3|ENSG00000136636.12|ENSG00000136636.12|0|4929	10	276
hsa_circ_0001148|circRNA|hsa_circ_0001148|hsa_circ_0001148|hsa_circ_0001148|0|600	10	276.4
ENSG00000163956.10|mRNA|LRPAP1|ENSG00000163956.10|ENSG00000163956.10|0|8724	10	277.6
hsa_circ_0021918|circRNA|hsa_circ_0021918|hsa_circ_0021918|hsa_circ_0021918|0|600	10	279.1
ENSG00000260729.1|mRNA|AC009690.1|ENSG00000260729.1|ENSG00000260729.1|0|4374	10	279.2
ENSG00000171720.9|mRNA|HDAC3|ENSG00000171720.9|ENSG00000171720.9|0|4631	10	280.7
ENSG00000138375.12|mRNA|SMARCAL1|ENSG00000138375.12|ENSG00000138375.12|0|5092	10	281.3
hsa_circ_0080828|circRNA|hsa_circ_0080828|hsa_circ_0080828|hsa_circ_0080828|0|260	10	282
ENSG00000170476.15|mRNA|MZB1|ENSG00000170476.15|ENSG00000170476.15|0|2273	10	282.9
ENSG00000148488.15|mRNA|ST8SIA6|ENSG00000148488.15|ENSG00000148488.15|0|2627	10	284.4
ENSG00000283321.1|mRNA|AC019117.3|ENSG00000283321.1|ENSG00000283321.1|0|3523	10	284.6
ENSG00000268614.1|mRNA|AC008878.2|ENSG00000268614.1|ENSG00000268614.1|0|942	10	285.1
hsa_circ_0066536|circRNA|hsa_circ_0066536|hsa_circ_0066536|hsa_circ_0066536|0|600	10	285.9
hsa_circ_0004904|circRNA|hsa_circ_0004904|hsa_circ_0004904|hsa_circ_0004904|0|494	10	286.7
hsa_circ_0083226|circRNA|hsa_circ_0083226|hsa_circ_0083226|hsa_circ_0083226|0|600	10	287.3
ENSG00000127152.17|mRNA|BCL11B|ENSG00000127152.17|ENSG00000127152.17|0|7855	10	288.2
hsa_circ_0003413|circRNA|hsa_circ_0003413|hsa_circ_0003413|hsa_circ_0003413|0|358	10	289.2
ENSG00000255275.3|mRNA|AL080251.1|ENSG00000255275.3|ENSG00000255275.3|0|4369	10	289.9
hsa_circ_0005374|circRNA|hsa_circ_0005374|hsa_circ_0005374|hsa_circ_0005374|0|600	10	290.9
hsa_circ_0031239|circRNA|hsa_circ_0031239|hsa_circ_0031239|hsa_circ_0031239|0|600	10	291.2
ENSG00000204681.10|mRNA|GABBR1|ENSG00000204681.10|ENSG00000204681.10|0|8470	10	291.9
ENSG00000149639.14|mRNA|SOGA1|ENSG00000149639.14|ENSG00000149639.14|0|15128	10	292.8
ENSG00000173200.12|mRNA|PARP15|ENSG00000173200.12|ENSG00000173200.12|0|5507	10	293.4
hsa_circ_0004245|circRNA|hsa_circ_0004245|hsa_circ_0004245|hsa_circ_0004245|0|600	10	294.7
hsa_circ_0003643|circRNA|hsa_circ_0003643|hsa_circ_0003643|hsa_circ_0003643|0|600	10	298.1
ENSG00000146083.11|mRNA|RNF44|ENSG00000146083.11|ENSG00000146083.11|0|5660	10	299
hsa_circ_0061557|circRNA|hsa_circ_0061557|hsa_circ_0061557|hsa_circ_0061557|0|600	10	300.8
hsa_circ_0085596|circRNA|hsa_circ_0085596|hsa_circ_0085596|hsa_circ_0085596|0|600	10	302.7
ENSG00000185880.12|mRNA|TRIM69|ENSG00000185880.12|ENSG00000185880.12|0|9265	10	302.9
hsa_circ_0000119|circRNA|hsa_circ_0000119|hsa_circ_0000119|hsa_circ_0000119|0|600	10	304
hsa_circ_0073654|circRNA|hsa_circ_0073654|hsa_circ_0073654|hsa_circ_0073654|0|302	10	304.7
ENSG00000116017.10|mRNA|ARID3A|ENSG00000116017.10|ENSG00000116017.10|0|7210	10	304.7
ENSG00000075785.12|mRNA|RAB7A|ENSG00000075785.12|ENSG00000075785.12|0|2717	10	307.3
ENSG00000137642.12|mRNA|SORL1|ENSG00000137642.12|ENSG00000137642.12|0|19449	10	308.6
ENSG00000138801.8|mRNA|PAPSS1|ENSG00000138801.8|ENSG00000138801.8|0|3478	10	310.4
hsa_circ_0054413|circRNA|hsa_circ_0054413|hsa_circ_0054413|hsa_circ_0054413|0|600	10	310.8
ENSG00000134153.9|mRNA|EMC7|ENSG00000134153.9|ENSG00000134153.9|0|1538	10	311.6
ENSG00000168014.16|mRNA|C2CD3|ENSG00000168014.16|ENSG00000168014.16|0|12571	10	312.6
hsa_circ_0042952|circRNA|hsa_circ_0042952|hsa_circ_0042952|hsa_circ_0042952|0|600	10	312.9
hsa_circ_0001051|circRNA|hsa_circ_0001051|hsa_circ_0001051|hsa_circ_0001051|0|600	10	315.7
ENSG00000113716.12|mRNA|HMGXB3|ENSG00000113716.12|ENSG00000113716.12|0|6263	10	315.7
ENSG00000196549.10|mRNA|MME|ENSG00000196549.10|ENSG00000196549.10|0|9620	10	315.9
hsa_circ_0005955|circRNA|hsa_circ_0005955|hsa_circ_0005955|hsa_circ_0005955|0|566	10	316.5
ENSG00000085978.21|mRNA|ATG16L1|ENSG00000085978.21|ENSG00000085978.21|0|6047	10	316.7
ENSG00000115289.13|mRNA|PCGF1|ENSG00000115289.13|ENSG00000115289.13|0|2629	10	316.8
hsa_circ_0001630|circRNA|hsa_circ_0001630|hsa_circ_0001630|hsa_circ_0001630|0|600	10	317.2
hsa_circ_0033402|circRNA|hsa_circ_0033402|hsa_circ_0033402|hsa_circ_0033402|0|366	10	317.5
hsa_circ_0021412|circRNA|hsa_circ_0021412|hsa_circ_0021412|hsa_circ_0021412|0|600	10	318.2
ENSG00000137193.13|mRNA|PIM1|ENSG00000137193.13|ENSG00000137193.13|0|2977	10	320.9
hsa_circ_0000409|circRNA|hsa_circ_0000409|hsa_circ_0000409|hsa_circ_0000409|0|600	10	321.5
hsa_circ_0001412|circRNA|hsa_circ_0001412|hsa_circ_0001412|hsa_circ_0001412|0|600	10	321.8
ENSG00000281103.1|lncRNA|TRG-AS1|ENSG00000281103.1|ENSG00000281103.1|0|4130	10	323
ENSG00000173486.12|mRNA|FKBP2|ENSG00000173486.12|ENSG00000173486.12|0|1608	10	323.6
hsa_circ_0052606|circRNA|hsa_circ_0052606|hsa_circ_0052606|hsa_circ_0052606|0|600	10	325.4
hsa_circ_0001421|circRNA|hsa_circ_0001421|hsa_circ_0001421|hsa_circ_0001421|0|600	10	325.8
hsa_circ_0071834|circRNA|hsa_circ_0071834|hsa_circ_0071834|hsa_circ_0071834|0|342	10	327.5
ENSG00000074219.13|mRNA|TEAD2|ENSG00000074219.13|ENSG00000074219.13|0|2980	10	328.7
hsa_circ_0079668|circRNA|hsa_circ_0079668|hsa_circ_0079668|hsa_circ_0079668|0|480	10	328.8
ENSG00000081791.8|mRNA|KIAA0141|ENSG00000081791.8|ENSG00000081791.8|0|6047	10	331.9
ENSG00000139350.11|mRNA|NEDD1|ENSG00000139350.11|ENSG00000139350.11|0|4463	10	332.2
ENSG00000157637.12|mRNA|SLC38A10|ENSG00000157637.12|ENSG00000157637.12|0|7716	10	333.9
ENSG00000258567.1|pseudogene|DUX4L16|ENSG00000258567.1|ENSG00000258567.1|0|1264	10	335.2
hsa_circ_0001074|circRNA|hsa_circ_0001074|hsa_circ_0001074|hsa_circ_0001074|0|484	10	335.9
ENSG00000257122.5|pseudogene|RRN3P3|ENSG00000257122.5|ENSG00000257122.5|0|3366	10	338.2
ENSG00000173457.10|mRNA|PPP1R14B|ENSG00000173457.10|ENSG00000173457.10|0|1655	10	340.8
ENSG00000089154.10|mRNA|GCN1|ENSG00000089154.10|ENSG00000089154.10|0|9654	10	345.6
ENSG00000143742.12|mRNA|SRP9|ENSG00000143742.12|ENSG00000143742.12|0|1728	10	353.9
hsa_circ_0091364|circRNA|hsa_circ_0091364|hsa_circ_0091364|hsa_circ_0091364|0|382	10	355.9
hsa_circ_0007370|circRNA|hsa_circ_0007370|hsa_circ_0007370|hsa_circ_0007370|0|600	10	356.8
hsa_circ_0008618|circRNA|hsa_circ_0008618|hsa_circ_0008618|hsa_circ_0008618|0|600	10	359.2
ENSG00000196428.12|mRNA|TSC22D2|ENSG00000196428.12|ENSG00000196428.12|0|11676	10	361.5
hsa_circ_0048008|circRNA|hsa_circ_0048008|hsa_circ_0048008|hsa_circ_0048008|0|600	10	362.8
ENSG00000148700.14|mRNA|ADD3|ENSG00000148700.14|ENSG00000148700.14|0|6541	10	364.7
hsa_circ_0055950|circRNA|hsa_circ_0055950|hsa_circ_0055950|hsa_circ_0055950|0|572	10	365.3
hsa_circ_0091768|circRNA|hsa_circ_0091768|hsa_circ_0091768|hsa_circ_0091768|0|600	10	376.5
ENSG00000204010.3|mRNA|IFIT1B|ENSG00000204010.3|ENSG00000204010.3|0|1972	10	381.6
ENSG00000144785.8|mRNA|AC073896.1|ENSG00000144785.8|ENSG00000144785.8|0|1053	10	381.7
hsa_circ_0000542|circRNA|hsa_circ_0000542|hsa_circ_0000542|hsa_circ_0000542|0|600	10	384.3
hsa_circ_0003906|circRNA|hsa_circ_0003906|hsa_circ_0003906|hsa_circ_0003906|0|600	10	389.4
ENSG00000105327.17|mRNA|BBC3|ENSG00000105327.17|ENSG00000105327.17|0|3180	10	395.9
ENSG00000167703.14|mRNA|SLC43A2|ENSG00000167703.14|ENSG00000167703.14|0|10606	9	142.556
hsa_circ_0083012|circRNA|hsa_circ_0083012|hsa_circ_0083012|hsa_circ_0083012|0|600	9	173.222
hsa_circ_0004982|circRNA|hsa_circ_0004982|hsa_circ_0004982|hsa_circ_0004982|0|600	9	177.889
hsa_circ_0001975|circRNA|hsa_circ_0001975|hsa_circ_0001975|hsa_circ_0001975|0|600	9	178.667
hsa_circ_0006296|circRNA|hsa_circ_0006296|hsa_circ_0006296|hsa_circ_0006296|0|600	9	182.333
ENSG00000122025.14|mRNA|FLT3|ENSG00000122025.14|ENSG00000122025.14|0|4159	9	187.444
ENSG00000109654.14|mRNA|TRIM2|ENSG00000109654.14|ENSG00000109654.14|0|9425	9	187.444
ENSG00000261864.1|lncRNA|AC130462.1|ENSG00000261864.1|ENSG00000261864.1|0|549	9	196.778
hsa_circ_0013998|circRNA|hsa_circ_0013998|hsa_circ_0013998|hsa_circ_0013998|0|600	9	198
ENSG00000131848.9|mRNA|ZSCAN5A|ENSG00000131848.9|ENSG00000131848.9|0|8039	9	198.889
ENSG00000170089.15|pseudogene|AC106795.1|ENSG00000170089.15|ENSG00000170089.15|0|3852	9	200.778
ENSG00000265818.1|mRNA|EEF1E1-BLOC1S5|ENSG00000265818.1|ENSG00000265818.1|0|768	9	203.778
ENSG00000114784.3|mRNA|EIF1B|ENSG00000114784.3|ENSG00000114784.3|0|1912	9	206.333
ENSG00000103111.14|mRNA|MON1B|ENSG00000103111.14|ENSG00000103111.14|0|6942	9	207.667
hsa_circ_0080834|circRNA|hsa_circ_0080834|hsa_circ_0080834|hsa_circ_0080834|0|564	9	208.222
hsa_circ_0001921|circRNA|hsa_circ_0001921|hsa_circ_0001921|hsa_circ_0001921|0|448	9	209.222
hsa_circ_0049082|circRNA|hsa_circ_0049082|hsa_circ_0049082|hsa_circ_0049082|0|370	9	211.556
hsa_circ_0050463|circRNA|hsa_circ_0050463|hsa_circ_0050463|hsa_circ_0050463|0|486	9	216
ENSG00000142185.16|mRNA|TRPM2|ENSG00000142185.16|ENSG00000142185.16|0|6705	9	217.667
ENSG00000227671.4|pseudogene|AL390728.4|ENSG00000227671.4|ENSG00000227671.4|0|2160	9	218.222
hsa_circ_0069111|circRNA|hsa_circ_0069111|hsa_circ_0069111|hsa_circ_0069111|0|600	9	221.556
ENSG00000232176.1|pseudogene|AL161909.1|ENSG00000232176.1|ENSG00000232176.1|0|712	9	224.778
ENSG00000188895.11|mRNA|MSL1|ENSG00000188895.11|ENSG00000188895.11|0|7397	9	225.889
hsa_circ_0054761|circRNA|hsa_circ_0054761|hsa_circ_0054761|hsa_circ_0054761|0|600	9	228.222
ENSG00000283149.1|mRNA|AC068631.2|ENSG00000283149.1|ENSG00000283149.1|0|501	9	228.889
ENSG00000100347.14|mRNA|SAMM50|ENSG00000100347.14|ENSG00000100347.14|0|6435	9	232.667
ENSG00000144655.14|mRNA|CSRNP1|ENSG00000144655.14|ENSG00000144655.14|0|3214	9	236.667
ENSG00000113504.20|mRNA|SLC12A7|ENSG00000113504.20|ENSG00000113504.20|0|5984	9	239.889
ENSG00000169246.16|mRNA|NPIPB3|ENSG00000169246.16|ENSG00000169246.16|0|4717	9	240.444
ENSG00000089597.16|mRNA|GANAB|ENSG00000089597.16|ENSG00000089597.16|0|5027	9	241
ENSG00000244255.5|mRNA|AL645922.1|ENSG00000244255.5|ENSG00000244255.5|0|4069	9	245
ENSG00000265241.6|mRNA|RBM8A|ENSG00000265241.6|ENSG00000265241.6|0|5585	9	246
hsa_circ_0079629|circRNA|hsa_circ_0079629|hsa_circ_0079629|hsa_circ_0079629|0|600	9	246.778
ENSG00000253982.1|lncRNA|AC100810.1|ENSG00000253982.1|ENSG00000253982.1|0|1322	9	250
hsa_circ_0067989|circRNA|hsa_circ_0067989|hsa_circ_0067989|hsa_circ_0067989|0|564	9	250.667
hsa_circ_0005078|circRNA|hsa_circ_0005078|hsa_circ_0005078|hsa_circ_0005078|0|600	9	250.778
ENSG00000154359.12|mRNA|LONRF1|ENSG00000154359.12|ENSG00000154359.12|0|5685	9	251
hsa_circ_0001062|circRNA|hsa_circ_0001062|hsa_circ_0001062|hsa_circ_0001062|0|362	9	253.889
ENSG00000260170.1|mRNA|AC090527.2|ENSG00000260170.1|ENSG00000260170.1|0|1060	9	254.778
hsa_circ_0079855|circRNA|hsa_circ_0079855|hsa_circ_0079855|hsa_circ_0079855|0|600	9	255.111
ENSG00000106546.12|mRNA|AHR|ENSG00000106546.12|ENSG00000106546.12|0|6661	9	255.333
ENSG00000100918.12|mRNA|REC8|ENSG00000100918.12|ENSG00000100918.12|0|3844	9	256
hsa_circ_0035060|circRNA|hsa_circ_0035060|hsa_circ_0035060|hsa_circ_0035060|0|590	9	256.222
hsa_circ_0001185|circRNA|hsa_circ_0001185|hsa_circ_0001185|hsa_circ_0001185|0|600	9	256.556
hsa_circ_0003488|circRNA|hsa_circ_0003488|hsa_circ_0003488|hsa_circ_0003488|0|600	9	261.444
ENSG00000196189.12|mRNA|SEMA4A|ENSG00000196189.12|ENSG00000196189.12|0|6822	9	263.556
ENSG00000169228.13|mRNA|RAB24|ENSG00000169228.13|ENSG00000169228.13|0|2065	9	266.444
ENSG00000125651.13|mRNA|GTF2F1|ENSG00000125651.13|ENSG00000125651.13|0|3134	9	268.111
ENSG00000036054.12|mRNA|TBC1D23|ENSG00000036054.12|ENSG00000036054.12|0|5168	9	268.222
ENSG00000121152.9|mRNA|NCAPH|ENSG00000121152.9|ENSG00000121152.9|0|3278	9	273.444
ENSG00000138604.9|mRNA|GLCE|ENSG00000138604.9|ENSG00000138604.9|0|6630	9	275
hsa_circ_0075792|circRNA|hsa_circ_0075792|hsa_circ_0075792|hsa_circ_0075792|0|486	9	276.222
ENSG00000241973.10|mRNA|PI4KA|ENSG00000241973.10|ENSG00000241973.10|0|11407	9	276.444
hsa_circ_0000614|circRNA|hsa_circ_0000614|hsa_circ_0000614|hsa_circ_0000614|0|390	9	277.222
hsa_circ_0001280|circRNA|hsa_circ_0001280|hsa_circ_0001280|hsa_circ_0001280|0|600	9	279.667
ENSG00000107485.15|mRNA|GATA3|ENSG00000107485.15|ENSG00000107485.15|0|3253	9	280.222
ENSG00000083223.17|mRNA|ZCCHC6|ENSG00000083223.17|ENSG00000083223.17|0|6707	9	281.556
hsa_circ_0092020|circRNA|hsa_circ_0092020|hsa_circ_0092020|hsa_circ_0092020|0|600	9	282.667
hsa_circ_0009131|circRNA|hsa_circ_0009131|hsa_circ_0009131|hsa_circ_0009131|0|600	9	283.111
hsa_circ_0047769|circRNA|hsa_circ_0047769|hsa_circ_0047769|hsa_circ_0047769|0|600	9	283.444
ENSG00000282508.1|lncRNA|LINC01002|ENSG00000282508.1|ENSG00000282508.1|0|7765	9	283.889
ENSG00000149182.14|mRNA|ARFGAP2|ENSG00000149182.14|ENSG00000149182.14|0|5918	9	284.444
ENSG00000112210.11|mRNA|RAB23|ENSG00000112210.11|ENSG00000112210.11|0|4926	9	284.889
hsa_circ_0036403|circRNA|hsa_circ_0036403|hsa_circ_0036403|hsa_circ_0036403|0|600	9	286.778
hsa_circ_0003652|circRNA|hsa_circ_0003652|hsa_circ_0003652|hsa_circ_0003652|0|600	9	287.111
hsa_circ_0024843|circRNA|hsa_circ_0024843|hsa_circ_0024843|hsa_circ_0024843|0|600	9	287.222
ENSG00000164048.13|mRNA|ZNF589|ENSG00000164048.13|ENSG00000164048.13|0|5521	9	288.222
hsa_circ_0032406|circRNA|hsa_circ_0032406|hsa_circ_0032406|hsa_circ_0032406|0|600	9	289.556
ENSG00000181031.15|mRNA|RPH3AL|ENSG00000181031.15|ENSG00000181031.15|0|6066	9	290.889
ENSG00000008277.14|mRNA|ADAM22|ENSG00000008277.14|ENSG00000008277.14|0|12199	9	292.333
ENSG00000089127.12|mRNA|OAS1|ENSG00000089127.12|ENSG00000089127.12|0|4947	9	294.111
ENSG00000113361.12|mRNA|CDH6|ENSG00000113361.12|ENSG00000113361.12|0|12379	9	294.556
ENSG00000064419.13|mRNA|TNPO3|ENSG00000064419.13|ENSG00000064419.13|0|4676	9	296.111
hsa_circ_0056594|circRNA|hsa_circ_0056594|hsa_circ_0056594|hsa_circ_0056594|0|600	9	296.222
hsa_circ_0085006|circRNA|hsa_circ_0085006|hsa_circ_0085006|hsa_circ_0085006|0|282	9	297.333
ENSG00000272333.5|mRNA|KMT2B|ENSG00000272333.5|ENSG00000272333.5|0|10279	9	297.889
hsa_circ_0002003|circRNA|hsa_circ_0002003|hsa_circ_0002003|hsa_circ_0002003|0|600	9	298.333
ENSG00000198646.13|mRNA|NCOA6|ENSG00000198646.13|ENSG00000198646.13|0|11131	9	298.889
ENSG00000123268.8|mRNA|ATF1|ENSG00000123268.8|ENSG00000123268.8|0|2790	9	299.222
ENSG00000180879.13|mRNA|SSR4|ENSG00000180879.13|ENSG00000180879.13|0|4590	9	299.222
ENSG00000033178.12|mRNA|UBA6|ENSG00000033178.12|ENSG00000033178.12|0|11432	9	299.444
ENSG00000116198.12|mRNA|CEP104|ENSG00000116198.12|ENSG00000116198.12|0|7876	9	300.444
hsa_circ_0032924|circRNA|hsa_circ_0032924|hsa_circ_0032924|hsa_circ_0032924|0|468	9	300.778
ENSG00000116691.10|mRNA|MIIP|ENSG00000116691.10|ENSG00000116691.10|0|2821	9	301
ENSG00000276043.4|mRNA|UHRF1|ENSG00000276043.4|ENSG00000276043.4|0|5145	9	301.333
hsa_circ_0013452|circRNA|hsa_circ_0013452|hsa_circ_0013452|hsa_circ_0013452|0|380	9	302
ENSG00000233895.1|lncRNA|AL121761.1|ENSG00000233895.1|ENSG00000233895.1|0|1089	9	302.333
ENSG00000244270.1|pseudogene|AL139099.1|ENSG00000244270.1|ENSG00000244270.1|0|403	9	302.556
ENSG00000139718.10|mRNA|SETD1B|ENSG00000139718.10|ENSG00000139718.10|0|8314	9	303.778
hsa_circ_0030507|circRNA|hsa_circ_0030507|hsa_circ_0030507|hsa_circ_0030507|0|600	9	304.556
ENSG00000130770.17|mRNA|ATPIF1|ENSG00000130770.17|ENSG00000130770.17|0|2225	9	305.556
ENSG00000196507.10|mRNA|TCEAL3|ENSG00000196507.10|ENSG00000196507.10|0|2305	9	306.556
hsa_circ_0005354|circRNA|hsa_circ_0005354|hsa_circ_0005354|hsa_circ_0005354|0|600	9	306.556
hsa_circ_0091680|circRNA|hsa_circ_0091680|hsa_circ_0091680|hsa_circ_0091680|0|600	9	307.222
hsa_circ_0046685|circRNA|hsa_circ_0046685|hsa_circ_0046685|hsa_circ_0046685|0|224	9	307.333
ENSG00000213085.9|mRNA|CFAP45|ENSG00000213085.9|ENSG00000213085.9|0|2625	9	307.444
ENSG00000198833.6|mRNA|UBE2J1|ENSG00000198833.6|ENSG00000198833.6|0|4290	9	307.556
hsa_circ_0047357|circRNA|hsa_circ_0047357|hsa_circ_0047357|hsa_circ_0047357|0|600	9	308
hsa_circ_0008345|circRNA|hsa_circ_0008345|hsa_circ_0008345|hsa_circ_0008345|0|600	9	308
ENSG00000081189.15|mRNA|MEF2C|ENSG00000081189.15|ENSG00000081189.15|0|11755	9	309.333
ENSG00000271425.7|mRNA|NBPF10|ENSG00000271425.7|ENSG00000271425.7|0|13249	9	310.444
ENSG00000115084.13|mRNA|SLC35F5|ENSG00000115084.13|ENSG00000115084.13|0|7445	9	311.556
ENSG00000204977.9|mRNA|TRIM13|ENSG00000204977.9|ENSG00000204977.9|0|8080	9	313.444
ENSG00000232788.1|lncRNA|AC078883.3|ENSG00000232788.1|ENSG00000232788.1|0|1077	9	313.444
ENSG00000011021.21|mRNA|CLCN6|ENSG00000011021.21|ENSG00000011021.21|0|6938	9	314
hsa_circ_0008745|circRNA|hsa_circ_0008745|hsa_circ_0008745|hsa_circ_0008745|0|600	9	315.889
ENSG00000116005.11|mRNA|PCYOX1|ENSG00000116005.11|ENSG00000116005.11|0|5870	9	316
ENSG00000131095.12|mRNA|GFAP|ENSG00000131095.12|ENSG00000131095.12|0|12110	9	316.889
ENSG00000023191.16|mRNA|RNH1|ENSG00000023191.16|ENSG00000023191.16|0|7374	9	321.556
hsa_circ_0056663|circRNA|hsa_circ_0056663|hsa_circ_0056663|hsa_circ_0056663|0|600	9	323
ENSG00000280537.2|mRNA|AC068946.1|ENSG00000280537.2|ENSG00000280537.2|0|4650	9	323.556
ENSG00000129625.12|mRNA|REEP5|ENSG00000129625.12|ENSG00000129625.12|0|4230	9	328.444
hsa_circ_0078628|circRNA|hsa_circ_0078628|hsa_circ_0078628|hsa_circ_0078628|0|286	9	328.556
hsa_circ_0075919|circRNA|hsa_circ_0075919|hsa_circ_0075919|hsa_circ_0075919|0|600	9	328.778
ENSG00000246705.4|mRNA|H2AFJ|ENSG00000246705.4|ENSG00000246705.4|0|3356	9	332.222
ENSG00000143384.12|mRNA|MCL1|ENSG00000143384.12|ENSG00000143384.12|0|4371	9	332.556
hsa_circ_0008053|circRNA|hsa_circ_0008053|hsa_circ_0008053|hsa_circ_0008053|0|594	9	333
ENSG00000196505.10|mRNA|GDAP2|ENSG00000196505.10|ENSG00000196505.10|0|10496	9	333.778
hsa_circ_0024605|circRNA|hsa_circ_0024605|hsa_circ_0024605|hsa_circ_0024605|0|334	9	334.111
hsa_circ_0028665|circRNA|hsa_circ_0028665|hsa_circ_0028665|hsa_circ_0028665|0|352	9	334.889
hsa_circ_0085274|circRNA|hsa_circ_0085274|hsa_circ_0085274|hsa_circ_0085274|0|558	9	335.778
ENSG00000122224.17|mRNA|LY9|ENSG00000122224.17|ENSG00000122224.17|0|9118	9	336.778
ENSG00000182022.17|mRNA|CHST15|ENSG00000182022.17|ENSG00000182022.17|0|6554	9	337.556
hsa_circ_0008949|circRNA|hsa_circ_0008949|hsa_circ_0008949|hsa_circ_0008949|0|600	9	338.778
ENSG00000178996.13|mRNA|SNX18|ENSG00000178996.13|ENSG00000178996.13|0|6653	9	339.778
ENSG00000077150.18|mRNA|NFKB2|ENSG00000077150.18|ENSG00000077150.18|0|4484	9	341.667
hsa_circ_0062938|circRNA|hsa_circ_0062938|hsa_circ_0062938|hsa_circ_0062938|0|442	9	342.667
ENSG00000117528.11|mRNA|ABCD3|ENSG00000117528.11|ENSG00000117528.11|0|7519	9	345
hsa_circ_0009067|circRNA|hsa_circ_0009067|hsa_circ_0009067|hsa_circ_0009067|0|600	9	345.778
ENSG00000186409.14|mRNA|CCDC30|ENSG00000186409.14|ENSG00000186409.14|0|13504	9	349.444
ENSG00000163162.8|mRNA|RNF149|ENSG00000163162.8|ENSG00000163162.8|0|4836	9	351
hsa_circ_0068852|circRNA|hsa_circ_0068852|hsa_circ_0068852|hsa_circ_0068852|0|396	9	352.333
ENSG00000178951.8|mRNA|ZBTB7A|ENSG00000178951.8|ENSG00000178951.8|0|5725	9	354
ENSG00000157869.14|mRNA|RAB28|ENSG00000157869.14|ENSG00000157869.14|0|2221	9	356.778
hsa_circ_0003620|circRNA|hsa_circ_0003620|hsa_circ_0003620|hsa_circ_0003620|0|600	9	363.333
hsa_circ_0064872|circRNA|hsa_circ_0064872|hsa_circ_0064872|hsa_circ_0064872|0|230	9	367.556
ENSG00000110367.11|mRNA|DDX6|ENSG00000110367.11|ENSG00000110367.11|0|11444	9	369.222
hsa_circ_0005736|circRNA|hsa_circ_0005736|hsa_circ_0005736|hsa_circ_0005736|0|600	9	387
hsa_circ_0012883|circRNA|hsa_circ_0012883|hsa_circ_0012883|hsa_circ_0012883|0|600	9	407.333
ENSG00000187862.11|mRNA|TTC24|ENSG00000187862.11|ENSG00000187862.11|0|2829	8	100.5
ENSG00000006015.17|mRNA|C19orf60|ENSG00000006015.17|ENSG00000006015.17|0|3370	8	157.375
ENSG00000119682.16|mRNA|AREL1|ENSG00000119682.16|ENSG00000119682.16|0|7308	8	166.875
ENSG00000151651.15|mRNA|ADAM8|ENSG00000151651.15|ENSG00000151651.15|0|4780	8	179.375
hsa_circ_0047056|circRNA|hsa_circ_0047056|hsa_circ_0047056|hsa_circ_0047056|0|600	8	184
hsa_circ_0006208|circRNA|hsa_circ_0006208|hsa_circ_0006208|hsa_circ_0006208|0|452	8	185.625
ENSG00000164307.12|mRNA|ERAP1|ENSG00000164307.12|ENSG00000164307.12|0|7945	8	186.125
hsa_circ_0008137|circRNA|hsa_circ_0008137|hsa_circ_0008137|hsa_circ_0008137|0|566	8	190
ENSG00000165115.14|mRNA|KIF27|ENSG00000165115.14|ENSG00000165115.14|0|5140	8	190.75
ENSG00000241014.1|lncRNA|AC114490.1|ENSG00000241014.1|ENSG00000241014.1|0|3346	8	191.75
ENSG00000174891.12|mRNA|RSRC1|ENSG00000174891.12|ENSG00000174891.12|0|5117	8	193.25
ENSG00000089234.15|mRNA|BRAP|ENSG00000089234.15|ENSG00000089234.15|0|4686	8	197.375
ENSG00000198064.13|mRNA|NPIPB13|ENSG00000198064.13|ENSG00000198064.13|0|5202	8	197.375
hsa_circ_0006303|circRNA|hsa_circ_0006303|hsa_circ_0006303|hsa_circ_0006303|0|588	8	198.5
ENSG00000174501.14|mRNA|ANKRD36C|ENSG00000174501.14|ENSG00000174501.14|0|8574	8	198.5
ENSG00000100985.7|mRNA|MMP9|ENSG00000100985.7|ENSG00000100985.7|0|2336	8	200.25
ENSG00000095585.16|mRNA|BLNK|ENSG00000095585.16|ENSG00000095585.16|0|3655	8	207.5
hsa_circ_0003117|circRNA|hsa_circ_0003117|hsa_circ_0003117|hsa_circ_0003117|0|498	8	208.375
hsa_circ_0027957|circRNA|hsa_circ_0027957|hsa_circ_0027957|hsa_circ_0027957|0|246	8	209.125
ENSG00000018189.12|mRNA|RUFY3|ENSG00000018189.12|ENSG00000018189.12|0|8070	8	210.875
ENSG00000223959.8|pseudogene|AFG3L1P|ENSG00000223959.8|ENSG00000223959.8|0|9532	8	211.25
hsa_circ_0005490|circRNA|hsa_circ_0005490|hsa_circ_0005490|hsa_circ_0005490|0|600	8	213.25
hsa_circ_0000437|circRNA|hsa_circ_0000437|hsa_circ_0000437|hsa_circ_0000437|0|502	8	214.625
hsa_circ_0057602|circRNA|hsa_circ_0057602|hsa_circ_0057602|hsa_circ_0057602|0|600	8	216
ENSG00000108465.14|mRNA|CDK5RAP3|ENSG00000108465.14|ENSG00000108465.14|0|6070	8	216.25
hsa_circ_0000274|circRNA|hsa_circ_0000274|hsa_circ_0000274|hsa_circ_0000274|0|600	8	216.375
hsa_circ_0004622|circRNA|hsa_circ_0004622|hsa_circ_0004622|hsa_circ_0004622|0|528	8	216.875
ENSG00000121057.12|mRNA|AKAP1|ENSG00000121057.12|ENSG00000121057.12|0|5399	8	223.5
hsa_circ_0015261|circRNA|hsa_circ_0015261|hsa_circ_0015261|hsa_circ_0015261|0|600	8	224.25
hsa_circ_0000330|circRNA|hsa_circ_0000330|hsa_circ_0000330|hsa_circ_0000330|0|600	8	224.375
ENSG00000233013.10|pseudogene|FAM157B|ENSG00000233013.10|ENSG00000233013.10|0|2073	8	225.5
hsa_circ_0002178|circRNA|hsa_circ_0002178|hsa_circ_0002178|hsa_circ_0002178|0|600	8	226.625
ENSG00000130119.15|mRNA|GNL3L|ENSG00000130119.15|ENSG00000130119.15|0|2589	8	227.375
ENSG00000175224.16|mRNA|ATG13|ENSG00000175224.16|ENSG00000175224.16|0|7001	8	231.75
hsa_circ_0022025|circRNA|hsa_circ_0022025|hsa_circ_0022025|hsa_circ_0022025|0|232	8	232.625
ENSG00000119403.13|mRNA|PHF19|ENSG00000119403.13|ENSG00000119403.13|0|6733	8	232.875
ENSG00000143653.9|mRNA|SCCPDH|ENSG00000143653.9|ENSG00000143653.9|0|2503	8	234.75
hsa_circ_0019101|circRNA|hsa_circ_0019101|hsa_circ_0019101|hsa_circ_0019101|0|600	8	235
hsa_circ_0078379|circRNA|hsa_circ_0078379|hsa_circ_0078379|hsa_circ_0078379|0|600	8	235.375
hsa_circ_0007770|circRNA|hsa_circ_0007770|hsa_circ_0007770|hsa_circ_0007770|0|364	8	236.5
hsa_circ_0035648|circRNA|hsa_circ_0035648|hsa_circ_0035648|hsa_circ_0035648|0|600	8	237.875
hsa_circ_0002968|circRNA|hsa_circ_0002968|hsa_circ_0002968|hsa_circ_0002968|0|600	8	238.25
ENSG00000235298.1|lncRNA|AL354733.3|ENSG00000235298.1|ENSG00000235298.1|0|390	8	239
ENSG00000096872.15|mRNA|IFT74|ENSG00000096872.15|ENSG00000096872.15|0|3755	8	239.25
hsa_circ_0067680|circRNA|hsa_circ_0067680|hsa_circ_0067680|hsa_circ_0067680|0|600	8	239.375
hsa_circ_0088045|circRNA|hsa_circ_0088045|hsa_circ_0088045|hsa_circ_0088045|0|600	8	239.5
ENSG00000258052.1|mRNA|AC025263.2|ENSG00000258052.1|ENSG00000258052.1|0|548	8	241.125
hsa_circ_0074124|circRNA|hsa_circ_0074124|hsa_circ_0074124|hsa_circ_0074124|0|560	8	241.75
ENSG00000131023.12|mRNA|LATS1|ENSG00000131023.12|ENSG00000131023.12|0|8643	8	242.25
ENSG00000165113.12|mRNA|GKAP1|ENSG00000165113.12|ENSG00000165113.12|0|3381	8	242.375
ENSG00000069188.16|mRNA|SDK2|ENSG00000069188.16|ENSG00000069188.16|0|11607	8	242.875
ENSG00000171606.17|mRNA|ZNF274|ENSG00000171606.17|ENSG00000171606.17|0|8333	8	244
hsa_circ_0044825|circRNA|hsa_circ_0044825|hsa_circ_0044825|hsa_circ_0044825|0|600	8	247
ENSG00000004897.11|mRNA|CDC27|ENSG00000004897.11|ENSG00000004897.11|0|6824	8	248.875
hsa_circ_0006866|circRNA|hsa_circ_0006866|hsa_circ_0006866|hsa_circ_0006866|0|600	8	249.5
ENSG00000076604.14|mRNA|TRAF4|ENSG00000076604.14|ENSG00000076604.14|0|4596	8	249.5
ENSG00000079432.7|mRNA|CIC|ENSG00000079432.7|ENSG00000079432.7|0|9494	8	249.625
ENSG00000139645.9|mRNA|ANKRD52|ENSG00000139645.9|ENSG00000139645.9|0|8820	8	252.5
ENSG00000092529.23|mRNA|CAPN3|ENSG00000092529.23|ENSG00000092529.23|0|4995	8	252.875
ENSG00000160410.14|mRNA|SHKBP1|ENSG00000160410.14|ENSG00000160410.14|0|3936	8	254.5
hsa_circ_0003296|circRNA|hsa_circ_0003296|hsa_circ_0003296|hsa_circ_0003296|0|600	8	254.5
ENSG00000135535.15|mRNA|CD164|ENSG00000135535.15|ENSG00000135535.15|0|6842	8	254.875
hsa_circ_0085614|circRNA|hsa_circ_0085614|hsa_circ_0085614|hsa_circ_0085614|0|400	8	254.875
hsa_circ_0075436|circRNA|hsa_circ_0075436|hsa_circ_0075436|hsa_circ_0075436|0|600	8	256.75
hsa_circ_0060134|circRNA|hsa_circ_0060134|hsa_circ_0060134|hsa_circ_0060134|0|422	8	257.375
ENSG00000135842.16|mRNA|FAM129A|ENSG00000135842.16|ENSG00000135842.16|0|8372	8	257.375
hsa_circ_0002908|circRNA|hsa_circ_0002908|hsa_circ_0002908|hsa_circ_0002908|0|572	8	258
ENSG00000159788.18|mRNA|RGS12|ENSG00000159788.18|ENSG00000159788.18|0|13536	8	258.125
ENSG00000139289.13|mRNA|PHLDA1|ENSG00000139289.13|ENSG00000139289.13|0|8069	8	258.375
ENSG00000099331.13|mRNA|MYO9B|ENSG00000099331.13|ENSG00000099331.13|0|9948	8	261.25
ENSG00000232112.3|mRNA|TMA7|ENSG00000232112.3|ENSG00000232112.3|0|1139	8	262.5
hsa_circ_0012439|circRNA|hsa_circ_0012439|hsa_circ_0012439|hsa_circ_0012439|0|600	8	264.25
ENSG00000105968.18|mRNA|H2AFV|ENSG00000105968.18|ENSG00000105968.18|0|4749	8	266.375
hsa_circ_0005325|circRNA|hsa_circ_0005325|hsa_circ_0005325|hsa_circ_0005325|0|600	8	267.875
hsa_circ_0008283|circRNA|hsa_circ_0008283|hsa_circ_0008283|hsa_circ_0008283|0|600	8	267.875
ENSG00000144591.18|mRNA|GMPPA|ENSG00000144591.18|ENSG00000144591.18|0|5332	8	267.875
ENSG00000250909.1|lncRNA|AC138956.1|ENSG00000250909.1|ENSG00000250909.1|0|504	8	268.25
ENSG00000101052.12|mRNA|IFT52|ENSG00000101052.12|ENSG00000101052.12|0|2542	8	268.5
ENSG00000068724.15|mRNA|TTC7A|ENSG00000068724.15|ENSG00000068724.15|0|6949	8	268.875
ENSG00000136243.16|mRNA|NUPL2|ENSG00000136243.16|ENSG00000136243.16|0|4366	8	269.625
hsa_circ_0019606|circRNA|hsa_circ_0019606|hsa_circ_0019606|hsa_circ_0019606|0|600	8	270.5
ENSG00000169299.13|mRNA|PGM2|ENSG00000169299.13|ENSG00000169299.13|0|3704	8	270.625
hsa_circ_0044767|circRNA|hsa_circ_0044767|hsa_circ_0044767|hsa_circ_0044767|0|454	8	273
hsa_circ_0007064|circRNA|hsa_circ_0007064|hsa_circ_0007064|hsa_circ_0007064|0|600	8	274.375
ENSG00000116221.15|mRNA|MRPL37|ENSG00000116221.15|ENSG00000116221.15|0|2549	8	275.875
ENSG00000105851.10|mRNA|PIK3CG|ENSG00000105851.10|ENSG00000105851.10|0|5930	8	276.875
ENSG00000167670.15|mRNA|CHAF1A|ENSG00000167670.15|ENSG00000167670.15|0|4299	8	278.125
hsa_circ_0002092|circRNA|hsa_circ_0002092|hsa_circ_0002092|hsa_circ_0002092|0|600	8	279
hsa_circ_0002069|circRNA|hsa_circ_0002069|hsa_circ_0002069|hsa_circ_0002069|0|486	8	280.75
hsa_circ_0004780|circRNA|hsa_circ_0004780|hsa_circ_0004780|hsa_circ_0004780|0|600	8	280.75
ENSG00000105379.9|mRNA|ETFB|ENSG00000105379.9|ENSG00000105379.9|0|6526	8	282.75
ENSG00000135148.11|mRNA|TRAFD1|ENSG00000135148.11|ENSG00000135148.11|0|3940	8	283.625
ENSG00000105220.14|mRNA|GPI|ENSG00000105220.14|ENSG00000105220.14|0|9112	8	283.625
ENSG00000131401.11|pseudogene|NAPSB|ENSG00000131401.11|ENSG00000131401.11|0|1915	8	283.75
ENSG00000148187.17|mRNA|MRRF|ENSG00000148187.17|ENSG00000148187.17|0|11041	8	283.75
hsa_circ_0028899|circRNA|hsa_circ_0028899|hsa_circ_0028899|hsa_circ_0028899|0|600	8	284
ENSG00000155506.16|mRNA|LARP1|ENSG00000155506.16|ENSG00000155506.16|0|8492	8	285.75
ENSG00000216863.9|lncRNA|LY86-AS1|ENSG00000216863.9|ENSG00000216863.9|0|5603	8	286.375
ENSG00000107036.11|mRNA|RIC1|ENSG00000107036.11|ENSG00000107036.11|0|8591	8	286.875
ENSG00000117862.11|mRNA|TXNDC12|ENSG00000117862.11|ENSG00000117862.11|0|3630	8	288.5
ENSG00000012232.8|mRNA|EXTL3|ENSG00000012232.8|ENSG00000012232.8|0|13220	8	290.125
hsa_circ_0007458|circRNA|hsa_circ_0007458|hsa_circ_0007458|hsa_circ_0007458|0|600	8	290.375
hsa_circ_0051220|circRNA|hsa_circ_0051220|hsa_circ_0051220|hsa_circ_0051220|0|478	8	290.5
hsa_circ_0017926|circRNA|hsa_circ_0017926|hsa_circ_0017926|hsa_circ_0017926|0|556	8	292
ENSG00000117153.15|mRNA|KLHL12|ENSG00000117153.15|ENSG00000117153.15|0|3552	8	292
ENSG00000158104.11|mRNA|HPD|ENSG00000158104.11|ENSG00000158104.11|0|2223	8	292.125
hsa_circ_0091445|circRNA|hsa_circ_0091445|hsa_circ_0091445|hsa_circ_0091445|0|520	8	292.375
ENSG00000120756.12|mRNA|PLS1|ENSG00000120756.12|ENSG00000120756.12|0|5294	8	296.125
ENSG00000104774.12|mRNA|MAN2B1|ENSG00000104774.12|ENSG00000104774.12|0|5374	8	297.25
hsa_circ_0008609|circRNA|hsa_circ_0008609|hsa_circ_0008609|hsa_circ_0008609|0|600	8	298
ENSG00000110046.12|mRNA|ATG2A|ENSG00000110046.12|ENSG00000110046.12|0|7870	8	298.125
hsa_circ_0002279|circRNA|hsa_circ_0002279|hsa_circ_0002279|hsa_circ_0002279|0|336	8	301.25
hsa_circ_0007644|circRNA|hsa_circ_0007644|hsa_circ_0007644|hsa_circ_0007644|0|470	8	302.125
hsa_circ_0031626|circRNA|hsa_circ_0031626|hsa_circ_0031626|hsa_circ_0031626|0|600	8	302.25
ENSG00000163220.10|mRNA|S100A9|ENSG00000163220.10|ENSG00000163220.10|0|577	8	302.875
hsa_circ_0011536|circRNA|hsa_circ_0011536|hsa_circ_0011536|hsa_circ_0011536|0|600	8	303.25
ENSG00000244627.5|pseudogene|Z98749.2|ENSG00000244627.5|ENSG00000244627.5|0|3851	8	303.5
ENSG00000224557.7|pseudogene|HLA-DPB2|ENSG00000224557.7|ENSG00000224557.7|0|1600	8	303.75
ENSG00000215302.8|pseudogene|AC127502.1|ENSG00000215302.8|ENSG00000215302.8|0|2331	8	304.125
hsa_circ_0006869|circRNA|hsa_circ_0006869|hsa_circ_0006869|hsa_circ_0006869|0|600	8	306.375
ENSG00000276548.1|pseudogene|AC008740.2|ENSG00000276548.1|ENSG00000276548.1|0|110	8	307.625
ENSG00000175348.10|mRNA|TMEM9B|ENSG00000175348.10|ENSG00000175348.10|0|3064	8	307.75
ENSG00000167333.12|mRNA|TRIM68|ENSG00000167333.12|ENSG00000167333.12|0|4282	8	308.875
ENSG00000160305.17|mRNA|DIP2A|ENSG00000160305.17|ENSG00000160305.17|0|13557	8	309.375
ENSG00000269026.2|mRNA|AC003006.1|ENSG00000269026.2|ENSG00000269026.2|0|833	8	310.875
hsa_circ_0010113|circRNA|hsa_circ_0010113|hsa_circ_0010113|hsa_circ_0010113|0|600	8	311
hsa_circ_0064664|circRNA|hsa_circ_0064664|hsa_circ_0064664|hsa_circ_0064664|0|600	8	311.125
hsa_circ_0001030|circRNA|hsa_circ_0001030|hsa_circ_0001030|hsa_circ_0001030|0|370	8	313.5
ENSG00000114346.13|mRNA|ECT2|ENSG00000114346.13|ENSG00000114346.13|0|5499	8	314.75
ENSG00000153207.14|mRNA|AHCTF1|ENSG00000153207.14|ENSG00000153207.14|0|9609	8	315.375
ENSG00000130066.16|mRNA|SAT1|ENSG00000130066.16|ENSG00000130066.16|0|2498	8	315.75
ENSG00000077454.15|mRNA|LRCH4|ENSG00000077454.15|ENSG00000077454.15|0|6838	8	316.625
ENSG00000257103.8|mRNA|LSM14A|ENSG00000257103.8|ENSG00000257103.8|0|4748	8	318.75
hsa_circ_0000042|circRNA|hsa_circ_0000042|hsa_circ_0000042|hsa_circ_0000042|0|542	8	319.375
ENSG00000276087.1|mRNA|AC008073.3|ENSG00000276087.1|ENSG00000276087.1|0|2281	8	319.375
ENSG00000198408.13|mRNA|MGEA5|ENSG00000198408.13|ENSG00000198408.13|0|7247	8	319.75
hsa_circ_0004117|circRNA|hsa_circ_0004117|hsa_circ_0004117|hsa_circ_0004117|0|572	8	320.25
ENSG00000125912.10|mRNA|NCLN|ENSG00000125912.10|ENSG00000125912.10|0|4175	8	320.875
ENSG00000124688.13|mRNA|MAD2L1BP|ENSG00000124688.13|ENSG00000124688.13|0|1880	8	321.375
ENSG00000115840.13|mRNA|SLC25A12|ENSG00000115840.13|ENSG00000115840.13|0|5169	8	321.75
ENSG00000105397.13|mRNA|TYK2|ENSG00000105397.13|ENSG00000105397.13|0|6773	8	322.5
ENSG00000147130.14|mRNA|ZMYM3|ENSG00000147130.14|ENSG00000147130.14|0|6916	8	322.625
ENSG00000164715.5|mRNA|LMTK2|ENSG00000164715.5|ENSG00000164715.5|0|9139	8	322.625
ENSG00000160710.15|mRNA|ADAR|ENSG00000160710.15|ENSG00000160710.15|0|8356	8	323.75
ENSG00000023228.13|mRNA|NDUFS1|ENSG00000023228.13|ENSG00000023228.13|0|12268	8	324.125
ENSG00000249437.7|mRNA|NAIP|ENSG00000249437.7|ENSG00000249437.7|0|9513	8	325.25
ENSG00000166575.16|mRNA|TMEM135|ENSG00000166575.16|ENSG00000166575.16|0|5030	8	327
hsa_circ_0049375|circRNA|hsa_circ_0049375|hsa_circ_0049375|hsa_circ_0049375|0|552	8	329
ENSG00000283189.2|mRNA|AC104452.1|ENSG00000283189.2|ENSG00000283189.2|0|6807	8	329.125
ENSG00000139631.18|mRNA|CSAD|ENSG00000139631.18|ENSG00000139631.18|0|4390	8	329.25
hsa_circ_0003351|circRNA|hsa_circ_0003351|hsa_circ_0003351|hsa_circ_0003351|0|600	8	330.375
ENSG00000103995.13|mRNA|CEP152|ENSG00000103995.13|ENSG00000103995.13|0|8168	8	330.375
hsa_circ_0050776|circRNA|hsa_circ_0050776|hsa_circ_0050776|hsa_circ_0050776|0|600	8	331.375
ENSG00000235191.1|lncRNA|NUCB1-AS1|ENSG00000235191.1|ENSG00000235191.1|0|433	8	331.5
ENSG00000181444.12|mRNA|ZNF467|ENSG00000181444.12|ENSG00000181444.12|0|2734	8	331.625
ENSG00000115306.15|mRNA|SPTBN1|ENSG00000115306.15|ENSG00000115306.15|0|18504	8	331.875
hsa_circ_0003374|circRNA|hsa_circ_0003374|hsa_circ_0003374|hsa_circ_0003374|0|464	8	332.125
ENSG00000165832.5|mRNA|TRUB1|ENSG00000165832.5|ENSG00000165832.5|0|3601	8	332.625
hsa_circ_0054994|circRNA|hsa_circ_0054994|hsa_circ_0054994|hsa_circ_0054994|0|600	8	332.75
ENSG00000126756.11|mRNA|UXT|ENSG00000126756.11|ENSG00000126756.11|0|1243	8	337.625
hsa_circ_0002369|circRNA|hsa_circ_0002369|hsa_circ_0002369|hsa_circ_0002369|0|600	8	338.625
ENSG00000184730.10|mRNA|APOBR|ENSG00000184730.10|ENSG00000184730.10|0|3792	8	340.875
ENSG00000099899.14|mRNA|TRMT2A|ENSG00000099899.14|ENSG00000099899.14|0|3963	8	341.125
ENSG00000132768.13|mRNA|DPH2|ENSG00000132768.13|ENSG00000132768.13|0|2930	8	341.125
hsa_circ_0054203|circRNA|hsa_circ_0054203|hsa_circ_0054203|hsa_circ_0054203|0|548	8	342.75
hsa_circ_0003580|circRNA|hsa_circ_0003580|hsa_circ_0003580|hsa_circ_0003580|0|600	8	343
ENSG00000182158.14|mRNA|CREB3L2|ENSG00000182158.14|ENSG00000182158.14|0|8788	8	347
hsa_circ_0089969|circRNA|hsa_circ_0089969|hsa_circ_0089969|hsa_circ_0089969|0|600	8	347.375
ENSG00000155629.14|mRNA|PIK3AP1|ENSG00000155629.14|ENSG00000155629.14|0|5691	8	347.5
ENSG00000163399.15|mRNA|ATP1A1|ENSG00000163399.15|ENSG00000163399.15|0|7261	8	347.875
hsa_circ_0047497|circRNA|hsa_circ_0047497|hsa_circ_0047497|hsa_circ_0047497|0|590	8	349.25
ENSG00000092098.16|mRNA|RNF31|ENSG00000092098.16|ENSG00000092098.16|0|4982	8	350.125
ENSG00000028203.17|mRNA|VEZT|ENSG00000028203.17|ENSG00000028203.17|0|8757	8	350.625
ENSG00000133321.10|mRNA|RARRES3|ENSG00000133321.10|ENSG00000133321.10|0|1299	8	352.875
ENSG00000133104.12|mRNA|SPART|ENSG00000133104.12|ENSG00000133104.12|0|6387	8	355.25
hsa_circ_0007676|circRNA|hsa_circ_0007676|hsa_circ_0007676|hsa_circ_0007676|0|600	8	357
hsa_circ_0000378|circRNA|hsa_circ_0000378|hsa_circ_0000378|hsa_circ_0000378|0|600	8	358
hsa_circ_0039299|circRNA|hsa_circ_0039299|hsa_circ_0039299|hsa_circ_0039299|0|600	8	363.75
ENSG00000102158.19|mRNA|MAGT1|ENSG00000102158.19|ENSG00000102158.19|0|4862	8	367.5
ENSG00000039068.18|mRNA|CDH1|ENSG00000039068.18|ENSG00000039068.18|0|6177	8	377
hsa_circ_0017092|circRNA|hsa_circ_0017092|hsa_circ_0017092|hsa_circ_0017092|0|588	8	377.75
ENSG00000134686.18|mRNA|PHC2|ENSG00000134686.18|ENSG00000134686.18|0|4975	8	380.25
hsa_circ_0070569|circRNA|hsa_circ_0070569|hsa_circ_0070569|hsa_circ_0070569|0|328	8	397.25
ENSG00000261366.1|lncRNA|MANEA-AS1|ENSG00000261366.1|ENSG00000261366.1|0|2268	8	401
hsa_circ_0074008|circRNA|hsa_circ_0074008|hsa_circ_0074008|hsa_circ_0074008|0|600	8	405
ENSG00000248672.5|mRNA|LY75-CD302|ENSG00000248672.5|ENSG00000248672.5|0|5650	8	414.625
hsa_circ_0038725|circRNA|hsa_circ_0038725|hsa_circ_0038725|hsa_circ_0038725|0|600	8	421.125
ENSG00000169682.17|mRNA|SPNS1|ENSG00000169682.17|ENSG00000169682.17|0|3792	7	105.857
hsa_circ_0053917|circRNA|hsa_circ_0053917|hsa_circ_0053917|hsa_circ_0053917|0|600	7	122.571
ENSG00000185304.14|mRNA|RGPD2|ENSG00000185304.14|ENSG00000185304.14|0|7023	7	145.143
ENSG00000215154.6|pseudogene|AC141586.1|ENSG00000215154.6|ENSG00000215154.6|0|2751	7	148.714
hsa_circ_0006657|circRNA|hsa_circ_0006657|hsa_circ_0006657|hsa_circ_0006657|0|600	7	159.143
ENSG00000197808.11|mRNA|ZNF461|ENSG00000197808.11|ENSG00000197808.11|0|4204	7	161.143
hsa_circ_0058182|circRNA|hsa_circ_0058182|hsa_circ_0058182|hsa_circ_0058182|0|550	7	162.286
hsa_circ_0038980|circRNA|hsa_circ_0038980|hsa_circ_0038980|hsa_circ_0038980|0|600	7	164.143
ENSG00000047346.12|mRNA|FAM214A|ENSG00000047346.12|ENSG00000047346.12|0|9832	7	171.571
ENSG00000086062.12|mRNA|B4GALT1|ENSG00000086062.12|ENSG00000086062.12|0|4901	7	172
hsa_circ_0085322|circRNA|hsa_circ_0085322|hsa_circ_0085322|hsa_circ_0085322|0|600	7	172.857
hsa_circ_0007672|circRNA|hsa_circ_0007672|hsa_circ_0007672|hsa_circ_0007672|0|600	7	180.714
ENSG00000184708.17|mRNA|EIF4ENIF1|ENSG00000184708.17|ENSG00000184708.17|0|6084	7	181.143
ENSG00000104870.12|mRNA|FCGRT|ENSG00000104870.12|ENSG00000104870.12|0|4173	7	182.429
ENSG00000187116.13|mRNA|LILRA5|ENSG00000187116.13|ENSG00000187116.13|0|1760	7	189.429
ENSG00000103056.11|mRNA|SMPD3|ENSG00000103056.11|ENSG00000103056.11|0|7166	7	193.714
ENSG00000148737.16|mRNA|TCF7L2|ENSG00000148737.16|ENSG00000148737.16|0|6736	7	196.714
hsa_circ_0032248|circRNA|hsa_circ_0032248|hsa_circ_0032248|hsa_circ_0032248|0|600	7	198.286
ENSG00000186265.9|mRNA|BTLA|ENSG00000186265.9|ENSG00000186265.9|0|3697	7	198.429
ENSG00000118596.11|mRNA|SLC16A7|ENSG00000118596.11|ENSG00000118596.11|0|13665	7	203.429
ENSG00000171105.13|mRNA|INSR|ENSG00000171105.13|ENSG00000171105.13|0|10451	7	208.714
hsa_circ_0053397|circRNA|hsa_circ_0053397|hsa_circ_0053397|hsa_circ_0053397|0|302	7	208.857
hsa_circ_0000836|circRNA|hsa_circ_0000836|hsa_circ_0000836|hsa_circ_0000836|0|600	7	214
hsa_circ_0079653|circRNA|hsa_circ_0079653|hsa_circ_0079653|hsa_circ_0079653|0|600	7	214.286
hsa_circ_0004999|circRNA|hsa_circ_0004999|hsa_circ_0004999|hsa_circ_0004999|0|600	7	218
ENSG00000132823.10|mRNA|OSER1|ENSG00000132823.10|ENSG00000132823.10|0|1712	7	218.143
ENSG00000198682.12|mRNA|PAPSS2|ENSG00000198682.12|ENSG00000198682.12|0|4083	7	218.143
ENSG00000198734.10|mRNA|F5|ENSG00000198734.10|ENSG00000198734.10|0|7158	7	218.286
ENSG00000277443.2|mRNA|MARCKS|ENSG00000277443.2|ENSG00000277443.2|0|4275	7	219.286
hsa_circ_0006722|circRNA|hsa_circ_0006722|hsa_circ_0006722|hsa_circ_0006722|0|600	7	223
ENSG00000118579.12|mRNA|MED28|ENSG00000118579.12|ENSG00000118579.12|0|10982	7	223.429
ENSG00000136247.14|mRNA|ZDHHC4|ENSG00000136247.14|ENSG00000136247.14|0|3557	7	224
hsa_circ_0046677|circRNA|hsa_circ_0046677|hsa_circ_0046677|hsa_circ_0046677|0|496	7	226.286
ENSG00000139187.9|mRNA|KLRG1|ENSG00000139187.9|ENSG00000139187.9|0|2598	7	226.857
hsa_circ_0016709|circRNA|hsa_circ_0016709|hsa_circ_0016709|hsa_circ_0016709|0|600	7	227.286
hsa_circ_0005757|circRNA|hsa_circ_0005757|hsa_circ_0005757|hsa_circ_0005757|0|600	7	228.857
hsa_circ_0076347|circRNA|hsa_circ_0076347|hsa_circ_0076347|hsa_circ_0076347|0|600	7	233.571
ENSG00000176438.12|mRNA|SYNE3|ENSG00000176438.12|ENSG00000176438.12|0|18164	7	234.857
ENSG00000188906.14|mRNA|LRRK2|ENSG00000188906.14|ENSG00000188906.14|0|13465	7	235.429
hsa_circ_0001791|circRNA|hsa_circ_0001791|hsa_circ_0001791|hsa_circ_0001791|0|484	7	236.429
hsa_circ_0052099|circRNA|hsa_circ_0052099|hsa_circ_0052099|hsa_circ_0052099|0|512	7	237
ENSG00000268043.7|mRNA|NBPF12|ENSG00000268043.7|ENSG00000268043.7|0|7272	7	237.286
hsa_circ_0034533|circRNA|hsa_circ_0034533|hsa_circ_0034533|hsa_circ_0034533|0|600	7	238.571
ENSG00000142178.7|mRNA|SIK1|ENSG00000142178.7|ENSG00000142178.7|0|4886	7	239.286
ENSG00000143702.15|mRNA|CEP170|ENSG00000143702.15|ENSG00000143702.15|0|10939	7	239.571
ENSG00000011304.19|mRNA|PTBP1|ENSG00000011304.19|ENSG00000011304.19|0|6883	7	240.714
hsa_circ_0023065|circRNA|hsa_circ_0023065|hsa_circ_0023065|hsa_circ_0023065|0|600	7	242.286
ENSG00000256861.1|mRNA|AC048338.1|ENSG00000256861.1|ENSG00000256861.1|0|2748	7	242.429
ENSG00000250349.3|mRNA|AF241726.2|ENSG00000250349.3|ENSG00000250349.3|0|954	7	242.857
ENSG00000167895.14|mRNA|TMC8|ENSG00000167895.14|ENSG00000167895.14|0|5459	7	243.143
hsa_circ_0002425|circRNA|hsa_circ_0002425|hsa_circ_0002425|hsa_circ_0002425|0|396	7	243.571
hsa_circ_0005085|circRNA|hsa_circ_0005085|hsa_circ_0005085|hsa_circ_0005085|0|438	7	244.286
ENSG00000275023.4|mRNA|MLLT6|ENSG00000275023.4|ENSG00000275023.4|0|13315	7	244.429
ENSG00000078140.13|mRNA|UBE2K|ENSG00000078140.13|ENSG00000078140.13|0|5245	7	244.571
ENSG00000276234.4|mRNA|TADA2A|ENSG00000276234.4|ENSG00000276234.4|0|5654	7	244.857
hsa_circ_0015796|circRNA|hsa_circ_0015796|hsa_circ_0015796|hsa_circ_0015796|0|302	7	246.857
ENSG00000140199.11|mRNA|SLC12A6|ENSG00000140199.11|ENSG00000140199.11|0|10056	7	247.286
ENSG00000253251.2|mRNA|AC008560.1|ENSG00000253251.2|ENSG00000253251.2|0|1964	7	248.286
ENSG00000186020.12|mRNA|ZNF529|ENSG00000186020.12|ENSG00000186020.12|0|8173	7	250.143
ENSG00000072694.20|mRNA|FCGR2B|ENSG00000072694.20|ENSG00000072694.20|0|6651	7	250.857
hsa_circ_0004404|circRNA|hsa_circ_0004404|hsa_circ_0004404|hsa_circ_0004404|0|524	7	252.286
hsa_circ_0007651|circRNA|hsa_circ_0007651|hsa_circ_0007651|hsa_circ_0007651|0|600	7	252.714
hsa_circ_0017447|circRNA|hsa_circ_0017447|hsa_circ_0017447|hsa_circ_0017447|0|600	7	252.857
ENSG00000263327.6|lncRNA|TAPT1-AS1|ENSG00000263327.6|ENSG00000263327.6|0|2763	7	256.714
hsa_circ_0007764|circRNA|hsa_circ_0007764|hsa_circ_0007764|hsa_circ_0007764|0|600	7	256.714
hsa_circ_0040386|circRNA|hsa_circ_0040386|hsa_circ_0040386|hsa_circ_0040386|0|558	7	256.714
ENSG00000094975.13|mRNA|SUCO|ENSG00000094975.13|ENSG00000094975.13|0|7894	7	257.429
hsa_circ_0036000|circRNA|hsa_circ_0036000|hsa_circ_0036000|hsa_circ_0036000|0|466	7	258
ENSG00000242349.5|lncRNA|NPPA-AS1|ENSG00000242349.5|ENSG00000242349.5|0|1427	7	262.714
ENSG00000103061.12|mRNA|SLC7A6OS|ENSG00000103061.12|ENSG00000103061.12|0|5229	7	264.143
ENSG00000279072.1|lncRNA|AC118758.3|ENSG00000279072.1|ENSG00000279072.1|0|24137	7	264.429
hsa_circ_0024643|circRNA|hsa_circ_0024643|hsa_circ_0024643|hsa_circ_0024643|0|600	7	265
ENSG00000155970.11|mRNA|MICU3|ENSG00000155970.11|ENSG00000155970.11|0|4606	7	265.571
ENSG00000184840.11|mRNA|TMED9|ENSG00000184840.11|ENSG00000184840.11|0|2440	7	265.714
hsa_circ_0047270|circRNA|hsa_circ_0047270|hsa_circ_0047270|hsa_circ_0047270|0|600	7	266.429
hsa_circ_0037897|circRNA|hsa_circ_0037897|hsa_circ_0037897|hsa_circ_0037897|0|600	7	267
hsa_circ_0034803|circRNA|hsa_circ_0034803|hsa_circ_0034803|hsa_circ_0034803|0|598	7	267.286
ENSG00000138835.22|mRNA|RGS3|ENSG00000138835.22|ENSG00000138835.22|0|13793	7	267.286
ENSG00000182648.11|lncRNA|LINC01006|ENSG00000182648.11|ENSG00000182648.11|0|3964	7	268.429
hsa_circ_0079410|circRNA|hsa_circ_0079410|hsa_circ_0079410|hsa_circ_0079410|0|520	7	268.571
hsa_circ_0006435|circRNA|hsa_circ_0006435|hsa_circ_0006435|hsa_circ_0006435|0|600	7	269.429
hsa_circ_0002903|circRNA|hsa_circ_0002903|hsa_circ_0002903|hsa_circ_0002903|0|600	7	270.286
ENSG00000141424.12|mRNA|SLC39A6|ENSG00000141424.12|ENSG00000141424.12|0|3682	7	270.571
hsa_circ_0004441|circRNA|hsa_circ_0004441|hsa_circ_0004441|hsa_circ_0004441|0|600	7	270.714
ENSG00000124733.3|mRNA|MEA1|ENSG00000124733.3|ENSG00000124733.3|0|1089	7	271
hsa_circ_0067291|circRNA|hsa_circ_0067291|hsa_circ_0067291|hsa_circ_0067291|0|600	7	276.286
ENSG00000141456.14|mRNA|PELP1|ENSG00000141456.14|ENSG00000141456.14|0|6577	7	276.429
hsa_circ_0031657|circRNA|hsa_circ_0031657|hsa_circ_0031657|hsa_circ_0031657|0|530	7	276.857
hsa_circ_0001550|circRNA|hsa_circ_0001550|hsa_circ_0001550|hsa_circ_0001550|0|600	7	277.286
ENSG00000196305.17|mRNA|IARS|ENSG00000196305.17|ENSG00000196305.17|0|7401	7	277.571
hsa_circ_0085612|circRNA|hsa_circ_0085612|hsa_circ_0085612|hsa_circ_0085612|0|600	7	278.286
hsa_circ_0034881|circRNA|hsa_circ_0034881|hsa_circ_0034881|hsa_circ_0034881|0|272	7	278.714
hsa_circ_0083826|circRNA|hsa_circ_0083826|hsa_circ_0083826|hsa_circ_0083826|0|530	7	279.286
hsa_circ_0003203|circRNA|hsa_circ_0003203|hsa_circ_0003203|hsa_circ_0003203|0|600	7	279.571
ENSG00000006282.20|mRNA|SPATA20|ENSG00000006282.20|ENSG00000006282.20|0|5337	7	280.143
ENSG00000226510.1|lncRNA|UPK1A-AS1|ENSG00000226510.1|ENSG00000226510.1|0|795	7	281.714
hsa_circ_0003548|circRNA|hsa_circ_0003548|hsa_circ_0003548|hsa_circ_0003548|0|600	7	281.857
hsa_circ_0006167|circRNA|hsa_circ_0006167|hsa_circ_0006167|hsa_circ_0006167|0|600	7	281.857
hsa_circ_0008285|circRNA|hsa_circ_0008285|hsa_circ_0008285|hsa_circ_0008285|0|600	7	283.143
ENSG00000110245.11|mRNA|APOC3|ENSG00000110245.11|ENSG00000110245.11|0|866	7	283.143
hsa_circ_0002732|circRNA|hsa_circ_0002732|hsa_circ_0002732|hsa_circ_0002732|0|600	7	283.429
ENSG00000123965.13|pseudogene|PMS2P5|ENSG00000123965.13|ENSG00000123965.13|0|516	7	284.286
ENSG00000105639.18|mRNA|JAK3|ENSG00000105639.18|ENSG00000105639.18|0|6813	7	284.714
ENSG00000059728.10|mRNA|MXD1|ENSG00000059728.10|ENSG00000059728.10|0|6351	7	285
hsa_circ_0003287|circRNA|hsa_circ_0003287|hsa_circ_0003287|hsa_circ_0003287|0|524	7	285.571
ENSG00000116406.18|mRNA|EDEM3|ENSG00000116406.18|ENSG00000116406.18|0|7804	7	285.857
hsa_circ_0001617|circRNA|hsa_circ_0001617|hsa_circ_0001617|hsa_circ_0001617|0|600	7	285.857
hsa_circ_0079801|circRNA|hsa_circ_0079801|hsa_circ_0079801|hsa_circ_0079801|0|600	7	286
ENSG00000185187.12|mRNA|SIGIRR|ENSG00000185187.12|ENSG00000185187.12|0|3496	7	286.143
hsa_circ_0001495|circRNA|hsa_circ_0001495|hsa_circ_0001495|hsa_circ_0001495|0|600	7	286.571
hsa_circ_0005759|circRNA|hsa_circ_0005759|hsa_circ_0005759|hsa_circ_0005759|0|388	7	286.714
ENSG00000249141.1|mRNA|AL159163.1|ENSG00000249141.1|ENSG00000249141.1|0|600	7	286.857
ENSG00000198792.12|mRNA|TMEM184B|ENSG00000198792.12|ENSG00000198792.12|0|7080	7	287.143
ENSG00000110844.13|mRNA|PRPF40B|ENSG00000110844.13|ENSG00000110844.13|0|9444	7	287.143
hsa_circ_0066104|circRNA|hsa_circ_0066104|hsa_circ_0066104|hsa_circ_0066104|0|302	7	287.714
ENSG00000162302.12|mRNA|RPS6KA4|ENSG00000162302.12|ENSG00000162302.12|0|3807	7	287.857
hsa_circ_0000620|circRNA|hsa_circ_0000620|hsa_circ_0000620|hsa_circ_0000620|0|600	7	288
hsa_circ_0021827|circRNA|hsa_circ_0021827|hsa_circ_0021827|hsa_circ_0021827|0|356	7	288.143
ENSG00000267048.1|lncRNA|AC092143.4|ENSG00000267048.1|ENSG00000267048.1|0|559	7	288.429
ENSG00000010292.12|mRNA|NCAPD2|ENSG00000010292.12|ENSG00000010292.12|0|6487	7	288.714
ENSG00000188818.12|mRNA|ZDHHC11|ENSG00000188818.12|ENSG00000188818.12|0|6953	7	288.857
ENSG00000057757.9|mRNA|PITHD1|ENSG00000057757.9|ENSG00000057757.9|0|2186	7	289
hsa_circ_0001788|circRNA|hsa_circ_0001788|hsa_circ_0001788|hsa_circ_0001788|0|440	7	289.714
ENSG00000160218.12|mRNA|TRAPPC10|ENSG00000160218.12|ENSG00000160218.12|0|11941	7	289.857
ENSG00000107537.13|mRNA|PHYH|ENSG00000107537.13|ENSG00000107537.13|0|3381	7	291.714
hsa_circ_0027399|circRNA|hsa_circ_0027399|hsa_circ_0027399|hsa_circ_0027399|0|268	7	291.714
ENSG00000146701.11|mRNA|MDH2|ENSG00000146701.11|ENSG00000146701.11|0|3641	7	294.571
hsa_circ_0001080|circRNA|hsa_circ_0001080|hsa_circ_0001080|hsa_circ_0001080|0|600	7	294.857
hsa_circ_0065808|circRNA|hsa_circ_0065808|hsa_circ_0065808|hsa_circ_0065808|0|474	7	295
ENSG00000165661.16|mRNA|QSOX2|ENSG00000165661.16|ENSG00000165661.16|0|4530	7	295.571
ENSG00000215039.6|lncRNA|CD27-AS1|ENSG00000215039.6|ENSG00000215039.6|0|3411	7	295.714
ENSG00000010810.17|mRNA|FYN|ENSG00000010810.17|ENSG00000010810.17|0|7411	7	297.286
ENSG00000061987.15|mRNA|MON2|ENSG00000061987.15|ENSG00000061987.15|0|16017	7	298
ENSG00000160219.11|mRNA|GAB3|ENSG00000160219.11|ENSG00000160219.11|0|5272	7	298.429
hsa_circ_0008536|circRNA|hsa_circ_0008536|hsa_circ_0008536|hsa_circ_0008536|0|600	7	298.429
hsa_circ_0035226|circRNA|hsa_circ_0035226|hsa_circ_0035226|hsa_circ_0035226|0|336	7	299
hsa_circ_0001521|circRNA|hsa_circ_0001521|hsa_circ_0001521|hsa_circ_0001521|0|600	7	299.143
ENSG00000149262.16|mRNA|INTS4|ENSG00000149262.16|ENSG00000149262.16|0|6074	7	299.857
ENSG00000137221.14|mRNA|TJAP1|ENSG00000137221.14|ENSG00000137221.14|0|6741	7	300.286
hsa_circ_0004599|circRNA|hsa_circ_0004599|hsa_circ_0004599|hsa_circ_0004599|0|600	7	301.571
hsa_circ_0018894|circRNA|hsa_circ_0018894|hsa_circ_0018894|hsa_circ_0018894|0|600	7	302.571
hsa_circ_0072023|circRNA|hsa_circ_0072023|hsa_circ_0072023|hsa_circ_0072023|0|546	7	302.857
ENSG00000267581.1|lncRNA|AC011477.4|ENSG00000267581.1|ENSG00000267581.1|0|609	7	303.714
ENSG00000219626.8|mRNA|FAM228B|ENSG00000219626.8|ENSG00000219626.8|0|4916	7	304.857
hsa_circ_0069425|circRNA|hsa_circ_0069425|hsa_circ_0069425|hsa_circ_0069425|0|600	7	305
ENSG00000154582.16|mRNA|ELOC|ENSG00000154582.16|ENSG00000154582.16|0|4934	7	305.429
hsa_circ_0015099|circRNA|hsa_circ_0015099|hsa_circ_0015099|hsa_circ_0015099|0|538	7	305.714
hsa_circ_0074081|circRNA|hsa_circ_0074081|hsa_circ_0074081|hsa_circ_0074081|0|600	7	306
hsa_circ_0066513|circRNA|hsa_circ_0066513|hsa_circ_0066513|hsa_circ_0066513|0|410	7	306.143
hsa_circ_0010466|circRNA|hsa_circ_0010466|hsa_circ_0010466|hsa_circ_0010466|0|508	7	307
ENSG00000187736.12|mRNA|NHEJ1|ENSG00000187736.12|ENSG00000187736.12|0|3109	7	307.286
hsa_circ_0007096|circRNA|hsa_circ_0007096|hsa_circ_0007096|hsa_circ_0007096|0|488	7	308.143
ENSG00000032444.15|mRNA|PNPLA6|ENSG00000032444.15|ENSG00000032444.15|0|7055	7	308.714
ENSG00000214013.9|mRNA|GANC|ENSG00000214013.9|ENSG00000214013.9|0|10954	7	310.286
ENSG00000050405.13|mRNA|LIMA1|ENSG00000050405.13|ENSG00000050405.13|0|6317	7	310.714
hsa_circ_0086462|circRNA|hsa_circ_0086462|hsa_circ_0086462|hsa_circ_0086462|0|600	7	311.143
ENSG00000104219.12|mRNA|ZDHHC2|ENSG00000104219.12|ENSG00000104219.12|0|6735	7	311.143
ENSG00000168159.11|mRNA|RNF187|ENSG00000168159.11|ENSG00000168159.11|0|3285	7	311.714
hsa_circ_0053413|circRNA|hsa_circ_0053413|hsa_circ_0053413|hsa_circ_0053413|0|600	7	311.714
hsa_circ_0000192|circRNA|hsa_circ_0000192|hsa_circ_0000192|hsa_circ_0000192|0|496	7	311.857
ENSG00000127191.17|mRNA|TRAF2|ENSG00000127191.17|ENSG00000127191.17|0|3663	7	312.857
hsa_circ_0000396|circRNA|hsa_circ_0000396|hsa_circ_0000396|hsa_circ_0000396|0|600	7	314
ENSG00000174749.5|mRNA|C4orf32|ENSG00000174749.5|ENSG00000174749.5|0|8901	7	314.857
ENSG00000030110.12|mRNA|BAK1|ENSG00000030110.12|ENSG00000030110.12|0|2212	7	316
hsa_circ_0027461|circRNA|hsa_circ_0027461|hsa_circ_0027461|hsa_circ_0027461|0|600	7	316.429
ENSG00000112365.4|mRNA|ZBTB24|ENSG00000112365.4|ENSG00000112365.4|0|5519	7	316.714
ENSG00000127995.16|mRNA|CASD1|ENSG00000127995.16|ENSG00000127995.16|0|5271	7	316.857
ENSG00000188536.12|mRNA|HBA2|ENSG00000188536.12|ENSG00000188536.12|0|856	7	318.571
hsa_circ_0000880|circRNA|hsa_circ_0000880|hsa_circ_0000880|hsa_circ_0000880|0|526	7	318.571
ENSG00000129295.8|mRNA|LRRC6|ENSG00000129295.8|ENSG00000129295.8|0|2778	7	318.857
ENSG00000234684.6|lncRNA|SDCBP2-AS1|ENSG00000234684.6|ENSG00000234684.6|0|4058	7	320
ENSG00000147454.13|mRNA|SLC25A37|ENSG00000147454.13|ENSG00000147454.13|0|8147	7	320.857
hsa_circ_0051892|circRNA|hsa_circ_0051892|hsa_circ_0051892|hsa_circ_0051892|0|600	7	321.143
ENSG00000135932.10|mRNA|CAB39|ENSG00000135932.10|ENSG00000135932.10|0|5360	7	321.286
ENSG00000188580.14|mRNA|NKAIN2|ENSG00000188580.14|ENSG00000188580.14|0|4197	7	322.857
ENSG00000277108.1|snoRNA|SNORD49B|ENSG00000277108.1|ENSG00000277108.1|0|72	7	323.429
hsa_circ_0008227|circRNA|hsa_circ_0008227|hsa_circ_0008227|hsa_circ_0008227|0|300	7	324.143
hsa_circ_0054893|circRNA|hsa_circ_0054893|hsa_circ_0054893|hsa_circ_0054893|0|600	7	324.286
ENSG00000027697.13|mRNA|IFNGR1|ENSG00000027697.13|ENSG00000027697.13|0|2571	7	324.429
ENSG00000164733.20|mRNA|CTSB|ENSG00000164733.20|ENSG00000164733.20|0|7428	7	325
hsa_circ_0002457|circRNA|hsa_circ_0002457|hsa_circ_0002457|hsa_circ_0002457|0|600	7	325.143
ENSG00000279073.3|mRNA|AL807752.6|ENSG00000279073.3|ENSG00000279073.3|0|890	7	326.714
ENSG00000166562.8|mRNA|SEC11C|ENSG00000166562.8|ENSG00000166562.8|0|4511	7	327
ENSG00000258465.6|mRNA|AL139011.2|ENSG00000258465.6|ENSG00000258465.6|0|2875	7	327.571
hsa_circ_0056310|circRNA|hsa_circ_0056310|hsa_circ_0056310|hsa_circ_0056310|0|414	7	328.571
ENSG00000065978.18|mRNA|YBX1|ENSG00000065978.18|ENSG00000065978.18|0|1930	7	328.714
hsa_circ_0039100|circRNA|hsa_circ_0039100|hsa_circ_0039100|hsa_circ_0039100|0|600	7	331.571
ENSG00000162747.9|mRNA|FCGR3B|ENSG00000162747.9|ENSG00000162747.9|0|3073	7	331.714
hsa_circ_0071121|circRNA|hsa_circ_0071121|hsa_circ_0071121|hsa_circ_0071121|0|600	7	332.286
ENSG00000278259.4|mRNA|MYO19|ENSG00000278259.4|ENSG00000278259.4|0|13075	7	332.857
ENSG00000158711.13|mRNA|ELK4|ENSG00000158711.13|ENSG00000158711.13|0|12142	7	333
ENSG00000107954.10|mRNA|NEURL1|ENSG00000107954.10|ENSG00000107954.10|0|4961	7	335
ENSG00000241860.6|lncRNA|AL627309.5|ENSG00000241860.6|ENSG00000241860.6|0|6195	7	335.857
ENSG00000199461.1|Y_RNA|Y_RNA|ENSG00000199461.1|ENSG00000199461.1|0|102	7	336.571
hsa_circ_0035104|circRNA|hsa_circ_0035104|hsa_circ_0035104|hsa_circ_0035104|0|600	7	337.571
hsa_circ_0006225|circRNA|hsa_circ_0006225|hsa_circ_0006225|hsa_circ_0006225|0|380	7	337.571
hsa_circ_0004087|circRNA|hsa_circ_0004087|hsa_circ_0004087|hsa_circ_0004087|0|600	7	337.857
ENSG00000184508.10|mRNA|HDDC3|ENSG00000184508.10|ENSG00000184508.10|0|2606	7	338.143
hsa_circ_0002465|circRNA|hsa_circ_0002465|hsa_circ_0002465|hsa_circ_0002465|0|600	7	338.714
ENSG00000062650.18|mRNA|WAPL|ENSG00000062650.18|ENSG00000062650.18|0|7228	7	338.714
ENSG00000097033.14|mRNA|SH3GLB1|ENSG00000097033.14|ENSG00000097033.14|0|6881	7	339.286
hsa_circ_0070990|circRNA|hsa_circ_0070990|hsa_circ_0070990|hsa_circ_0070990|0|332	7	340
ENSG00000123575.8|mRNA|FAM199X|ENSG00000123575.8|ENSG00000123575.8|0|7457	7	340.571
ENSG00000213889.10|mRNA|PPM1N|ENSG00000213889.10|ENSG00000213889.10|0|2571	7	341.571
ENSG00000184922.13|mRNA|FMNL1|ENSG00000184922.13|ENSG00000184922.13|0|7576	7	341.714
ENSG00000110713.15|mRNA|NUP98|ENSG00000110713.15|ENSG00000110713.15|0|9905	7	342.429
ENSG00000115604.10|mRNA|IL18R1|ENSG00000115604.10|ENSG00000115604.10|0|4353	7	345
hsa_circ_0070471|circRNA|hsa_circ_0070471|hsa_circ_0070471|hsa_circ_0070471|0|600	7	345.286
hsa_circ_0046841|circRNA|hsa_circ_0046841|hsa_circ_0046841|hsa_circ_0046841|0|572	7	345.429
hsa_circ_0066535|circRNA|hsa_circ_0066535|hsa_circ_0066535|hsa_circ_0066535|0|600	7	345.571
ENSG00000106018.13|mRNA|VIPR2|ENSG00000106018.13|ENSG00000106018.13|0|5222	7	346.143
ENSG00000169446.5|mRNA|MMGT1|ENSG00000169446.5|ENSG00000169446.5|0|3738	7	348.429
hsa_circ_0083535|circRNA|hsa_circ_0083535|hsa_circ_0083535|hsa_circ_0083535|0|600	7	349.857
ENSG00000168298.6|mRNA|HIST1H1E|ENSG00000168298.6|ENSG00000168298.6|0|754	7	351.143
hsa_circ_0069718|circRNA|hsa_circ_0069718|hsa_circ_0069718|hsa_circ_0069718|0|600	7	351.429
ENSG00000125779.21|mRNA|PANK2|ENSG00000125779.21|ENSG00000125779.21|0|6698	7	353.143
ENSG00000155100.10|mRNA|OTUD6B|ENSG00000155100.10|ENSG00000155100.10|0|3977	7	353.429
ENSG00000162654.8|mRNA|GBP4|ENSG00000162654.8|ENSG00000162654.8|0|6127	7	358.286
hsa_circ_0004988|circRNA|hsa_circ_0004988|hsa_circ_0004988|hsa_circ_0004988|0|600	7	358.429
hsa_circ_0002538|circRNA|hsa_circ_0002538|hsa_circ_0002538|hsa_circ_0002538|0|600	7	359.286
hsa_circ_0083756|circRNA|hsa_circ_0083756|hsa_circ_0083756|hsa_circ_0083756|0|462	7	360.429
ENSG00000151012.13|mRNA|SLC7A11|ENSG00000151012.13|ENSG00000151012.13|0|9645	7	363.857
hsa_circ_0005997|circRNA|hsa_circ_0005997|hsa_circ_0005997|hsa_circ_0005997|0|384	7	366.286
ENSG00000126464.13|mRNA|PRR12|ENSG00000126464.13|ENSG00000126464.13|0|7093	7	366.286
ENSG00000163806.15|mRNA|SPDYA|ENSG00000163806.15|ENSG00000163806.15|0|3483	7	366.857
ENSG00000102221.13|mRNA|JADE3|ENSG00000102221.13|ENSG00000102221.13|0|5137	7	369
hsa_circ_0000252|circRNA|hsa_circ_0000252|hsa_circ_0000252|hsa_circ_0000252|0|600	7	369.857
ENSG00000157106.16|mRNA|SMG1|ENSG00000157106.16|ENSG00000157106.16|0|25988	7	372.143
hsa_circ_0010835|circRNA|hsa_circ_0010835|hsa_circ_0010835|hsa_circ_0010835|0|418	7	372.143
hsa_circ_0003362|circRNA|hsa_circ_0003362|hsa_circ_0003362|hsa_circ_0003362|0|600	7	372.429
ENSG00000224616.1|lncRNA|RTCA-AS1|ENSG00000224616.1|ENSG00000224616.1|0|423	7	372.571
ENSG00000058453.16|mRNA|CROCC|ENSG00000058453.16|ENSG00000058453.16|0|8871	7	373.143
ENSG00000213024.11|mRNA|NUP62|ENSG00000213024.11|ENSG00000213024.11|0|6020	7	376.286
ENSG00000077380.15|mRNA|DYNC1I2|ENSG00000077380.15|ENSG00000077380.15|0|4695	7	380
hsa_circ_0005918|circRNA|hsa_circ_0005918|hsa_circ_0005918|hsa_circ_0005918|0|600	7	385
ENSG00000225484.6|lncRNA|NUTM2B-AS1|ENSG00000225484.6|ENSG00000225484.6|0|14755	7	396.286
ENSG00000225733.5|lncRNA|FGD5-AS1|ENSG00000225733.5|ENSG00000225733.5|0|5131	7	406.143
ENSG00000118271.9|mRNA|TTR|ENSG00000118271.9|ENSG00000118271.9|0|2173	6	139.667
ENSG00000163728.10|mRNA|TTC14|ENSG00000163728.10|ENSG00000163728.10|0|7783	6	166.5
hsa_circ_0008692|circRNA|hsa_circ_0008692|hsa_circ_0008692|hsa_circ_0008692|0|600	6	167.5
hsa_circ_0075273|circRNA|hsa_circ_0075273|hsa_circ_0075273|hsa_circ_0075273|0|600	6	168.5
hsa_circ_0065159|circRNA|hsa_circ_0065159|hsa_circ_0065159|hsa_circ_0065159|0|466	6	172.833
hsa_circ_0006654|circRNA|hsa_circ_0006654|hsa_circ_0006654|hsa_circ_0006654|0|600	6	179.833
ENSG00000075240.16|mRNA|GRAMD4|ENSG00000075240.16|ENSG00000075240.16|0|4885	6	181.667
ENSG00000135968.20|mRNA|GCC2|ENSG00000135968.20|ENSG00000135968.20|0|13282	6	183.167
ENSG00000188603.18|mRNA|CLN3|ENSG00000188603.18|ENSG00000188603.18|0|9858	6	183.5
ENSG00000161533.11|mRNA|ACOX1|ENSG00000161533.11|ENSG00000161533.11|0|8472	6	184.167
hsa_circ_0085778|circRNA|hsa_circ_0085778|hsa_circ_0085778|hsa_circ_0085778|0|600	6	184.333
hsa_circ_0001099|circRNA|hsa_circ_0001099|hsa_circ_0001099|hsa_circ_0001099|0|600	6	184.5
hsa_circ_0014717|circRNA|hsa_circ_0014717|hsa_circ_0014717|hsa_circ_0014717|0|600	6	184.5
hsa_circ_0073052|circRNA|hsa_circ_0073052|hsa_circ_0073052|hsa_circ_0073052|0|536	6	185.5
hsa_circ_0073438|circRNA|hsa_circ_0073438|hsa_circ_0073438|hsa_circ_0073438|0|534	6	189.5
ENSG00000174579.3|mRNA|MSL2|ENSG00000174579.3|ENSG00000174579.3|0|5095	6	190.667
hsa_circ_0039908|circRNA|hsa_circ_0039908|hsa_circ_0039908|hsa_circ_0039908|0|448	6	191.167
ENSG00000127948.15|mRNA|POR|ENSG00000127948.15|ENSG00000127948.15|0|6112	6	196.5
hsa_circ_0017689|circRNA|hsa_circ_0017689|hsa_circ_0017689|hsa_circ_0017689|0|382	6	196.833
ENSG00000244462.7|mRNA|RBM12|ENSG00000244462.7|ENSG00000244462.7|0|6702	6	198.5
ENSG00000177565.16|mRNA|TBL1XR1|ENSG00000177565.16|ENSG00000177565.16|0|11603	6	199
hsa_circ_0006188|circRNA|hsa_circ_0006188|hsa_circ_0006188|hsa_circ_0006188|0|600	6	200.667
ENSG00000162825.16|mRNA|NBPF20|ENSG00000162825.16|ENSG00000162825.16|0|18995	6	202.667
ENSG00000237990.3|lncRNA|CNTN4-AS1|ENSG00000237990.3|ENSG00000237990.3|0|2078	6	203.667
hsa_circ_0059056|circRNA|hsa_circ_0059056|hsa_circ_0059056|hsa_circ_0059056|0|422	6	204.167
ENSG00000013583.8|mRNA|HEBP1|ENSG00000013583.8|ENSG00000013583.8|0|3442	6	204.833
ENSG00000278963.1|lncRNA|AC005921.3|ENSG00000278963.1|ENSG00000278963.1|0|2151	6	206.667
ENSG00000106328.9|mRNA|FSCN3|ENSG00000106328.9|ENSG00000106328.9|0|3214	6	208
ENSG00000156170.12|mRNA|NDUFAF6|ENSG00000156170.12|ENSG00000156170.12|0|6406	6	208.5
ENSG00000273734.1|mRNA|AC005258.1|ENSG00000273734.1|ENSG00000273734.1|0|1268	6	209.333
ENSG00000283580.1|mRNA|AC098484.3|ENSG00000283580.1|ENSG00000283580.1|0|1348	6	210.667
hsa_circ_0067034|circRNA|hsa_circ_0067034|hsa_circ_0067034|hsa_circ_0067034|0|464	6	210.833
ENSG00000185420.18|mRNA|SMYD3|ENSG00000185420.18|ENSG00000185420.18|0|5866	6	212
ENSG00000181322.13|mRNA|NME9|ENSG00000181322.13|ENSG00000181322.13|0|3738	6	212.833
hsa_circ_0018551|circRNA|hsa_circ_0018551|hsa_circ_0018551|hsa_circ_0018551|0|600	6	213.167
ENSG00000114853.13|mRNA|ZBTB47|ENSG00000114853.13|ENSG00000114853.13|0|3781	6	214.333
ENSG00000166398.12|mRNA|KIAA0355|ENSG00000166398.12|ENSG00000166398.12|0|7459	6	214.5
hsa_circ_0000075|circRNA|hsa_circ_0000075|hsa_circ_0000075|hsa_circ_0000075|0|600	6	215.667
ENSG00000146535.13|mRNA|GNA12|ENSG00000146535.13|ENSG00000146535.13|0|6120	6	216.333
hsa_circ_0014632|circRNA|hsa_circ_0014632|hsa_circ_0014632|hsa_circ_0014632|0|600	6	217.667
ENSG00000134987.11|mRNA|WDR36|ENSG00000134987.11|ENSG00000134987.11|0|7656	6	217.833
hsa_circ_0004024|circRNA|hsa_circ_0004024|hsa_circ_0004024|hsa_circ_0004024|0|600	6	218.833
ENSG00000100711.13|mRNA|ZFYVE21|ENSG00000100711.13|ENSG00000100711.13|0|8390	6	221.833
hsa_circ_0020914|circRNA|hsa_circ_0020914|hsa_circ_0020914|hsa_circ_0020914|0|600	6	223.333
ENSG00000173442.12|mRNA|EHBP1L1|ENSG00000173442.12|ENSG00000173442.12|0|6741	6	223.833
ENSG00000257335.8|mRNA|MGAM|ENSG00000257335.8|ENSG00000257335.8|0|10767	6	224.5
hsa_circ_0073276|circRNA|hsa_circ_0073276|hsa_circ_0073276|hsa_circ_0073276|0|600	6	224.833
ENSG00000261832.6|mRNA|AC138894.1|ENSG00000261832.6|ENSG00000261832.6|0|4192	6	225.167
hsa_circ_0044731|circRNA|hsa_circ_0044731|hsa_circ_0044731|hsa_circ_0044731|0|600	6	227.167
hsa_circ_0057920|circRNA|hsa_circ_0057920|hsa_circ_0057920|hsa_circ_0057920|0|370	6	227.833
ENSG00000173905.8|mRNA|GOLIM4|ENSG00000173905.8|ENSG00000173905.8|0|4647	6	228
hsa_circ_0003335|circRNA|hsa_circ_0003335|hsa_circ_0003335|hsa_circ_0003335|0|428	6	230.167
ENSG00000119866.20|mRNA|BCL11A|ENSG00000119866.20|ENSG00000119866.20|0|8375	6	231.333
hsa_circ_0002111|circRNA|hsa_circ_0002111|hsa_circ_0002111|hsa_circ_0002111|0|600	6	231.5
hsa_circ_0004576|circRNA|hsa_circ_0004576|hsa_circ_0004576|hsa_circ_0004576|0|600	6	231.833
ENSG00000207499.1|Y_RNA|Y_RNA|ENSG00000207499.1|ENSG00000207499.1|0|102	6	234
hsa_circ_0009172|circRNA|hsa_circ_0009172|hsa_circ_0009172|hsa_circ_0009172|0|600	6	234.167
hsa_circ_0002222|circRNA|hsa_circ_0002222|hsa_circ_0002222|hsa_circ_0002222|0|404	6	234.167
hsa_circ_0023696|circRNA|hsa_circ_0023696|hsa_circ_0023696|hsa_circ_0023696|0|600	6	234.5
ENSG00000114867.20|mRNA|EIF4G1|ENSG00000114867.20|ENSG00000114867.20|0|8257	6	235.333
ENSG00000065491.8|mRNA|TBC1D22B|ENSG00000065491.8|ENSG00000065491.8|0|3462	6	235.833
hsa_circ_0079440|circRNA|hsa_circ_0079440|hsa_circ_0079440|hsa_circ_0079440|0|582	6	238.667
ENSG00000176155.18|mRNA|CCDC57|ENSG00000176155.18|ENSG00000176155.18|0|12397	6	241.5
ENSG00000110104.11|mRNA|CCDC86|ENSG00000110104.11|ENSG00000110104.11|0|2044	6	241.667
hsa_circ_0079643|circRNA|hsa_circ_0079643|hsa_circ_0079643|hsa_circ_0079643|0|600	6	242
hsa_circ_0064691|circRNA|hsa_circ_0064691|hsa_circ_0064691|hsa_circ_0064691|0|600	6	242.5
ENSG00000126351.12|mRNA|THRA|ENSG00000126351.12|ENSG00000126351.12|0|6959	6	243
hsa_circ_0003858|circRNA|hsa_circ_0003858|hsa_circ_0003858|hsa_circ_0003858|0|600	6	246.5
ENSG00000152620.12|mRNA|NADK2|ENSG00000152620.12|ENSG00000152620.12|0|4885	6	246.5
ENSG00000197471.11|mRNA|SPN|ENSG00000197471.11|ENSG00000197471.11|0|7382	6	247.667
hsa_circ_0064443|circRNA|hsa_circ_0064443|hsa_circ_0064443|hsa_circ_0064443|0|600	6	247.833
ENSG00000271605.5|mRNA|MILR1|ENSG00000271605.5|ENSG00000271605.5|0|1816	6	248
hsa_circ_0072654|circRNA|hsa_circ_0072654|hsa_circ_0072654|hsa_circ_0072654|0|600	6	248.5
ENSG00000189233.11|mRNA|NUGGC|ENSG00000189233.11|ENSG00000189233.11|0|3959	6	248.5
ENSG00000175324.9|mRNA|LSM1|ENSG00000175324.9|ENSG00000175324.9|0|1690	6	249.667
ENSG00000186162.10|pseudogene|CIDECP|ENSG00000186162.10|ENSG00000186162.10|0|3017	6	250.5
hsa_circ_0056199|circRNA|hsa_circ_0056199|hsa_circ_0056199|hsa_circ_0056199|0|600	6	251.667
ENSG00000134802.17|mRNA|SLC43A3|ENSG00000134802.17|ENSG00000134802.17|0|4517	6	252.333
ENSG00000074842.7|mRNA|MYDGF|ENSG00000074842.7|ENSG00000074842.7|0|1678	6	253.167
hsa_circ_0007439|circRNA|hsa_circ_0007439|hsa_circ_0007439|hsa_circ_0007439|0|448	6	254
hsa_circ_0004204|circRNA|hsa_circ_0004204|hsa_circ_0004204|hsa_circ_0004204|0|600	6	254.333
hsa_circ_0021502|circRNA|hsa_circ_0021502|hsa_circ_0021502|hsa_circ_0021502|0|576	6	256.333
hsa_circ_0071428|circRNA|hsa_circ_0071428|hsa_circ_0071428|hsa_circ_0071428|0|590	6	256.333
ENSG00000146007.10|mRNA|ZMAT2|ENSG00000146007.10|ENSG00000146007.10|0|1812	6	256.5
ENSG00000163689.19|mRNA|C3orf67|ENSG00000163689.19|ENSG00000163689.19|0|9455	6	256.667
hsa_circ_0004663|circRNA|hsa_circ_0004663|hsa_circ_0004663|hsa_circ_0004663|0|600	6	257.667
hsa_circ_0007683|circRNA|hsa_circ_0007683|hsa_circ_0007683|hsa_circ_0007683|0|544	6	258
hsa_circ_0002605|circRNA|hsa_circ_0002605|hsa_circ_0002605|hsa_circ_0002605|0|600	6	258.833
ENSG00000113569.15|mRNA|NUP155|ENSG00000113569.15|ENSG00000113569.15|0|9233	6	260
ENSG00000110108.9|mRNA|TMEM109|ENSG00000110108.9|ENSG00000110108.9|0|2421	6	260.167
hsa_circ_0019122|circRNA|hsa_circ_0019122|hsa_circ_0019122|hsa_circ_0019122|0|600	6	260.667
ENSG00000107929.14|mRNA|LARP4B|ENSG00000107929.14|ENSG00000107929.14|0|12836	6	261.333
ENSG00000063169.10|mRNA|BICRA|ENSG00000063169.10|ENSG00000063169.10|0|7507	6	262.833
hsa_circ_0000411|circRNA|hsa_circ_0000411|hsa_circ_0000411|hsa_circ_0000411|0|600	6	263.333
ENSG00000162735.18|mRNA|PEX19|ENSG00000162735.18|ENSG00000162735.18|0|4461	6	263.5
ENSG00000099999.14|mRNA|RNF215|ENSG00000099999.14|ENSG00000099999.14|0|10624	6	263.833
ENSG00000156273.15|mRNA|BACH1|ENSG00000156273.15|ENSG00000156273.15|0|7717	6	266.333
hsa_circ_0019787|circRNA|hsa_circ_0019787|hsa_circ_0019787|hsa_circ_0019787|0|398	6	266.5
ENSG00000110090.12|mRNA|CPT1A|ENSG00000110090.12|ENSG00000110090.12|0|6565	6	267.167
ENSG00000108479.11|mRNA|GALK1|ENSG00000108479.11|ENSG00000108479.11|0|2891	6	267.167
ENSG00000187627.15|mRNA|RGPD1|ENSG00000187627.15|ENSG00000187627.15|0|7166	6	267.333
hsa_circ_0070697|circRNA|hsa_circ_0070697|hsa_circ_0070697|hsa_circ_0070697|0|188	6	268.333
ENSG00000184014.7|mRNA|DENND5A|ENSG00000184014.7|ENSG00000184014.7|0|8648	6	268.5
ENSG00000049246.14|mRNA|PER3|ENSG00000049246.14|ENSG00000049246.14|0|8099	6	268.667
ENSG00000027869.11|mRNA|SH2D2A|ENSG00000027869.11|ENSG00000027869.11|0|2512	6	269.333
hsa_circ_0060734|circRNA|hsa_circ_0060734|hsa_circ_0060734|hsa_circ_0060734|0|600	6	269.667
hsa_circ_0014677|circRNA|hsa_circ_0014677|hsa_circ_0014677|hsa_circ_0014677|0|442	6	270.167
ENSG00000154451.14|mRNA|GBP5|ENSG00000154451.14|ENSG00000154451.14|0|8143	6	270.833
hsa_circ_0083500|circRNA|hsa_circ_0083500|hsa_circ_0083500|hsa_circ_0083500|0|600	6	271.167
ENSG00000226900.1|lncRNA|AL451069.1|ENSG00000226900.1|ENSG00000226900.1|0|634	6	271.5
ENSG00000196329.11|mRNA|GIMAP5|ENSG00000196329.11|ENSG00000196329.11|0|6031	6	271.667
ENSG00000135905.18|mRNA|DOCK10|ENSG00000135905.18|ENSG00000135905.18|0|11065	6	271.667
hsa_circ_0068654|circRNA|hsa_circ_0068654|hsa_circ_0068654|hsa_circ_0068654|0|268	6	271.833
hsa_circ_0072756|circRNA|hsa_circ_0072756|hsa_circ_0072756|hsa_circ_0072756|0|600	6	272.5
hsa_circ_0006108|circRNA|hsa_circ_0006108|hsa_circ_0006108|hsa_circ_0006108|0|532	6	273
ENSG00000271383.6|mRNA|NBPF19|ENSG00000271383.6|ENSG00000271383.6|0|18785	6	274.167
ENSG00000141556.20|mRNA|TBCD|ENSG00000141556.20|ENSG00000141556.20|0|13546	6	275.167
ENSG00000144134.18|mRNA|RABL2A|ENSG00000144134.18|ENSG00000144134.18|0|6008	6	275.833
ENSG00000158023.9|mRNA|WDR66|ENSG00000158023.9|ENSG00000158023.9|0|16115	6	277.667
ENSG00000179820.15|mRNA|MYADM|ENSG00000179820.15|ENSG00000179820.15|0|3675	6	278.167
hsa_circ_0006936|circRNA|hsa_circ_0006936|hsa_circ_0006936|hsa_circ_0006936|0|274	6	278.5
ENSG00000279198.1|lncRNA|AC008894.3|ENSG00000279198.1|ENSG00000279198.1|0|3103	6	278.833
ENSG00000272870.1|lncRNA|AC097534.2|ENSG00000272870.1|ENSG00000272870.1|0|2495	6	280
ENSG00000175567.8|mRNA|UCP2|ENSG00000175567.8|ENSG00000175567.8|0|3237	6	280.333
[truncated: 6,726 more rows]

## Sheet: kraken2
feature	count	importance-rank
99|Ancylobacter	100	124
1186|Calothrix	100	18.27
453161|Candidatus Nitrotoga	100	76.16
461|Fluoribacter	100	121.32
48075|Marinobacterium	100	88.93
191769|Marinilactibacillus	100	137.65
18|Pelobacter	100	20.86
529883|Rhodoluna	100	2.16
1855416|Qipengyuania	100	101.7
1849|Actinopolyspora	100	90.5
1847725|Lawsonella	100	17.71
64895|Borreliella	100	77.06
1632780|Phreatobacter	100	19.13
69474|Orientia	100	121.5
72763|Tessaracoccus	100	107.08
754249|Luteimicrobium	100	218.67
1470540|Jeotgalibaca	100	115.32
1231242|Ferrovibrio	100	24.54
12141|Tombusvirus	100	145.83
2035712|Guyparkeria	100	83.56
401618|Candidatus Riesia	100	101.27
231454|Dyella	100	86.79
351195|Salimicrobium	100	118.02
29407|Rhodoplanes	100	127.6
29393|Dolosigranulum	100	127.93
305899|Endozoicomonas	100	94.32
318147|Paucibacter	100	129.49
285107|Thioclava	100	70.05
282132|Candidatus Protochlamydia	100	100.65
349742|Sedimenticola	100	90.08
2675230|Cytobacillus	100	139.11
379899|Niabella	100	96.64
359336|Castellaniella	100	68.39
262|Francisella	100	69.64
2571159|Mycetohabitans	100	164.37
246861|Grimontia	100	132.89
2370|Xylella	100	51.36
234|Brucella	100	194.81
232523|Hylemonella	100	140.1
885864|Jeongeupia	100	16.97
29574|Taylorella	100	179.31
1091|Chlorobium	100	87.35
1055692|Chitinolyticbacter	100	235
106146|Pelistega	100	273.68
10405|Orthohepadnavirus	100	7.69
34102|Sphaerotilus	99	179.051
40136|Oligotropha	99	191.818
1302410|Candidatus Annandia	99	125.162
1649510|Variibacter	99	54.8485
1611681|Mucinivorans	99	84.0101
1077265|Chthonomonas	99	189.061
75905|Thermocrinis	99	163.949
1826864|Candidatus Nitrosocosmicus	99	199.232
687331|Alphatorquevirus	99	142.071
146|Spirochaeta	99	174.525
157226|Jeotgalibacillus	99	155.667
47|Archangium	99	176.333
1543704|Niveispirillum	99	138.414
10509|Mastadenovirus	98	263.327
40544|Sutterella	98	244.51
2600304|Baekduia	98	206.51
238749|Diaphorobacter	98	115.041
1395974|Tardiphaga	98	206.031
93|Stella	98	110.622
1654741|Bombella	98	215.49
28209|Chelatococcus	98	206.337
1755825|Egicoccus	98	262.571
379068|Galbibacter	98	188.133
152267|Pigmentiphaga	98	207.643
1195526|Gryllotalpicola	98	217.684
518753|Luteolibacter	98	157.745
311181|Denitratisoma	98	97.9388
434|Acetobacter	98	112.418
459532|Terribacillus	98	222.786
1085622|Propioniciclava	98	214.245
1647|Erysipelothrix	97	124.608
1936111|Fuerstia	97	255.876
141450|Oleiphilus	97	210.361
67575|Rheinheimera	97	187.794
953|Wolbachia	97	216.567
651456|Kosmotoga	97	216.804
1941236|Gemykibivirus	97	168.557
54066|Xylophilus	97	281.485
1734920|Pseudorhodoplanes	97	225
90243|Oligella	97	217.742
1511635|Aquisphaera	97	249.474
1769729|Hathewaya	97	182.907
359407|Methylotenera	97	274.825
1649486|Rhizorhabdus	96	153.042
2603324|Acidibrevibacterium	96	183.354
752201|Sphaerospermopsis	96	215.51
469322|Steroidobacter	96	195.219
465|Tatlockia	96	73.5
299566|Adhaeribacter	96	239.531
41273|Tissierella	96	202.625
1714270|Gammasphaerolipovirus	96	255.281
649461|Lacibacter	96	160.635
1291539|Candidatus Methanomethylophilus	96	233.76
2733115|Naesvirus	96	304.833
169055|Nordella	96	190.844
32014|Iodobacter	96	184.073
1682492|Candidatus Tachikawaea	95	211.474
1434046|Sphingorhabdus	95	227.6
1525371|Neorhizobium	95	281.758
1107|Chloroflexus	95	210.695
444459|Flagellimonas	95	199.737
267408|Arsenicicoccus	94	214.649
2220|Methanolobus	94	280.766
1569|Sporosarcina	94	238.234
1299429|Yuavirus	94	180.851
53945|Octadecabacter	94	222.053
773|Bartonella	94	197.936
141948|Thermomonas	93	180.978
387095|Maribius	93	232.989
187492|Thalassolituus	93	250.731
1649453|Gimesia	93	146.323
416|Methylomonas	93	148.204
154116|Georgenia	93	247.29
1676142|Wenzhouxiangella	93	222.624
1582879|Ezakiella	93	124.57
1911577|Oryzomicrobium	93	238.527
2019482|Brevefilum	93	145.667
1172191|Catenovulum	93	217.258
2489367|Candidatus Cyclonatronum	93	197.183
1649468|Melaminivora	93	260.086
204447|Skermanella	92	227.62
227388|Thermodesulfobium	92	182.652
59282|Blastochloris	92	258.239
655184|Candidatus Thioglobus	92	187.739
425|Methylosinus	92	246.576
599651|Bermanella	92	242.467
2304692|Hungateiclostridium	92	198.696
114627|Alkaliphilus	92	222.457
83614|Luteimonas	92	245.174
89966|Hymenobacter	92	205.054
34019|Liberibacter	92	188.446
28884|Hydrogenovibrio	92	277.337
1184606|Austwickia	92	224.913
748770|Dolichospermum	92	168.837
1218|Prochlorococcus	92	104.163
189384|Candidatus Tremblaya	91	343.769
2093|Mycoplasma	91	199.132
444051|Mesoflavibacter	91	259.813
1051|Ectothiorhodospira	91	124.615
1906657|Candidatus Doolittlea	91	216.593
497726|Nitrososphaera	91	185.275
1921582|Orrella	91	274.418
2211641|Yoonia	91	187.659
626119|Ruania	91	291.659
11646|Lentivirus	91	160.703
46205|Pseudobutyrivibrio	91	228.846
1055323|Aeribacillus	91	251.011
400947|Deefgea	91	198.088
10375|Lymphocryptovirus	91	214.901
2051044|Tuwongella	91	181.912
85076|Marichromatium	90	269
1663717|Herbinix	90	197.733
335405|Sphingosinicella	90	253.767
2282523|Methylorubrum	90	120.744
64159|Desulfurobacterium	90	143.2
140052|Betaretrovirus	90	262.178
2675231|Mesobacillus	90	220.594
261825|Agarivorans	90	164.022
261963|Kangiella	90	189.078
117156|Actinopolymorpha	89	275.933
1101|Prosthecochloris	89	196.022
71|Simonsiella	89	290.011
257820|Kerstersia	89	223.449
292486|Avibacterium	89	138.584
71666|Waddlia	89	199.034
1607807|Candidatus Methanoplasma	89	251.742
155977|Acaryochloris	89	187.607
28228|Colwellia	89	265.652
28050|Lachnospira	88	298.432
1485594|Methyloligella	88	178.864
288793|Salinimonas	88	236.136
596707|Sinomonas	88	292.807
2045213|Candidatus Fonsibacter	88	240.114
499228|Tepidanaerobacter	88	146.807
1602345|Parasaccharibacter	88	180.102
146784|Bacteriovorax	88	184.057
414371|Aureimonas	87	219.483
295595|Candidatus Hepatoplasma	87	253.621
29331|Amphibacillus	87	285.31
326319|Dokdonia	87	240.874
204476|Labrys	87	217.08
74385|Gracilibacillus	87	240.276
947525|Miniimonas	87	344.736
106591|Ensifer	87	350.598
1706036|Gemmatirosa	86	311.744
49277|Psychroserpens	86	206.558
366614|Haematobacter	86	158.849
623276|Maritalea	86	300.198
44474|Pleurocapsa	86	219.907
240411|Chitinimonas	86	273.372
1100891|Paenalcaligenes	86	275.64
332246|Halalkalicoccus	85	233.929
353799|Halostagnicola	85	317.012
59739|Flammeovirga	85	263.306
1649459|Hungatella	85	246.659
31988|Aminobacter	85	258.529
447467|Simiduia	85	187.2
45669|Salinicoccus	85	232.482
1912217|Pseudopropionibacterium	85	259.482
29287|Natronococcus	85	280.259
1434050|Zhongshania	85	202.141
2094023|Glaesserella	85	265.612
1392389|Intestinimonas	85	277.094
273135|Candidatus Cardinium	85	161.447
388463|Edaphobacter	84	272.024
655352|Cohaesibacter	84	215.952
93682|Roseivivax	84	252.298
82980|Leminorella	84	188.036
2478349|Indioceanicola	84	313.31
2732977|Citexvirus	84	237.274
908623|Euzebya	83	293.663
2675233|Metabacillus	83	247.843
286130|Sulfuricurvum	83	212.41
33951|Acetobacterium	83	215.301
2321113|Pseudoarcobacter	83	261.964
1572860|Hartmannibacter	83	265.651
1911549|Raineyella	83	232.386
670486|Dehalogenimonas	83	253.361
1862|Dermatophilus	83	274.434
776|Coxiella	83	279.157
649460|Filimonas	83	213.217
644355|Inhella	83	253.084
2675229|Peribacillus	83	262.072
1940138|Candidatus Walczuchella	83	269.964
1204360|Siansivirga	82	289.561
2330|Halanaerobium	82	83.6951
249529|Caldanaerobacter	82	272.524
2005363|Auricoccus	82	266.037
79206|Desulfosporosinus	82	111.085
142577|Prauserella	82	277.195
1649478|Pelolinea	82	237.768
1649470|Minicystis	82	310
119541|Rhodobaca	82	276.402
1623297|Stanholtvirus	82	286.756
1508657|Ruminiclostridium	82	216.878
2233801|Ahniella	82	291.024
60846|Halogeometricum	82	202.329
225143|Oceanisphaera	82	121.476
458839|Actinotalea	81	283.568
46352|Agrococcus	81	260.765
44258|Caloramator	81	228.198
466152|Singulisphaera	81	314.185
79328|Chitinophaga	81	242.556
28236|Petrotoga	81	277.667
156973|Dysgonomonas	80	204.938
1649474|Nibribacter	80	283
2717089|Massilistercora	80	283.238
2036021|Agarilytica	80	276.1
36739|Dermabacter	80	316.075
768|Anaplasma	79	301.899
1769012|Arachidicoccus	79	342.658
1623304|Moineauvirus	79	357.171
69578|Cryobacterium	79	242.899
171|Leptospira	79	296.316
1565532|Rouxiella	79	235.911
946234|Flavonifractor	79	326.291
830|Butyrivibrio	79	283.443
86795|Marmoricola	79	258.101
1205|Trichodesmium	79	241.608
1344552|Noviherbaspirillum	79	279.987
28250|Ornithobacterium	79	153.582
1980514|Halodesulfurarchaeum	78	245.692
1988|Actinomadura	78	317.679
68|Lysobacter	78	290.744
200903|Paraliobacillus	78	278.231
1861863|Sinimarinibacterium	78	231.205
1524214|Vulgatibacter	77	282.13
219181|Ottowia	77	300.636
1981050|Phoenicibacter	77	282.429
2700084|Urechidicola	77	225.961
162491|Oerskovia	77	332.273
158876|Yokenella	77	166.896
1621534|Paraglaciecola	77	280.468
168808|Sneathia	76	269.382
334107|Conchiformibius	76	230.882
1729679|Faecalibaculum	76	309.632
1935188|Libanicoccus	76	223.711
893|Desulfobulbus	76	175.303
84406|Virgibacillus	76	316.658
2375|Sporomusa	76	194.803
83612|Psychroflexus	76	163.487
875170|Celeribacter	76	192.658
810|Chlamydia	76	221.224
1335745|Spiribacter	76	336.329
44471|Microcoleus	76	295.092
1158|Oscillatoria	76	211.447
1075397|Halolamina	76	288.684
75309|Rhodanobacter	75	274.587
1911573|Haloprofundus	75	264.88
651660|Paenisporosarcina	75	178.733
990721|Christensenella	75	369.2
376170|Haloplanus	74	266.716
2147|Acholeplasma	74	260.635
2202|Methanospirillum	74	279.595
104204|Streptomonospora	74	275.419
34008|Rhodovulum	74	314.446
2689587|Suicoccus	74	219.108
933|Thiomicrospira	74	273.216
1623298|Phietavirus	74	300.568
687333|Gammatorquevirus	74	88.6622
490567|Arenimonas	74	226.203
1273155|Thiohalobacter	73	292.904
1751872|Lacimicrobium	73	191.63
1738655|Woeseia	73	270.452
204456|Gemmobacter	73	205.479
447020|Adlercreutzia	73	261.329
1905344|Ruthenibacterium	73	348.26
472825|Candidatus Purcelliella	73	265.411
1608298|Thiolapillus	73	331.548
159345|Roseibacterium	73	277.753
55079|Aneurinibacillus	73	207.384
1434018|Lysinimonas	73	238.808
34098|Blattabacterium	73	246.123
682522|Ilumatobacter	72	263.403
2321115|Halarcobacter	72	250.375
45989|Methanoculleus	72	266.625
427753|Humibacter	72	255.181
2661818|Saliniradius	72	308.889
2237|Haloarcula	72	297.347
236752|Fastidiosipila	72	286.597
2132|Spiroplasma	71	260.056
1203|Scytonema	71	273.254
187|Aquaspirillum	71	296.056
1509243|Candidatus Nucleicultrix	71	276.62
1649463|Lentilitoribacter	71	250.239
1518147|Wenyingzhuangia	71	313.761
1007|Saprospira	71	291.352
245876|Nitratireductor	71	298.099
898|Desulfomicrobium	71	268.746
238783|Pseudorhodobacter	71	158.62
367298|Phycicoccus	70	328.386
1649279|Epibacterium	70	239.571
687332|Betatorquevirus	70	95.2286
1754|Thermoanaerobacter	70	287.271
1778601|Apibacter	70	253.729
178469|Arenibacter	70	302.829
327159|Candidatus Accumulibacter	70	287.786
1184396|Mesotoga	70	258.714
135575|Idiomarina	69	259.652
334202|Mupapillomavirus	68	370.75
379070|Gilvibacter	68	287.235
125287|Ornithinimicrobium	68	317.941
11019|Alphavirus	68	386.353
121871|Haloterrigena	68	252.044
307628|Petrimonas	68	239.044
1926259|Pseudactinotalea	67	279.03
542837|Zindervirus	67	296.851
2028344|Ereboglobus	67	298.448
56358|Sandaracinobacter	67	271.388
1579506|Roseimaritima	67	250.313
281472|Jiangella	67	324.478
1073987|Halorientalis	67	291.851
697025|Hoyosella	67	378.567
1802983|Candidatus Fokinia	67	276.925
1283313|Alloprevotella	67	191.582
2172|Methanobrevibacter	67	279.851
665568|Paraoerskovia	67	267.343
1705353|Aurantimicrobium	66	290.97
242605|Luteibacter	66	289.879
169133|Citricoccus	66	218.621
1097466|Defluviimonas	66	295.455
2129|Ureaplasma	66	227.03
2483368|Sedimentisphaera	66	278.258
1331730|Chryseoglobus	66	343.47
1562|Desulfotomaculum	66	256.939
1434019|Mameliella	66	256.773
413435|Solimonas	66	295.576
2737|Vagococcus	66	214.424
1161127|Murdochiella	66	309.348
70774|Hydrogenophilus	65	243.308
511434|Candidatus Azobacteroides	65	178.046
233189|Anaerolinea	65	310.292
1137960|Allokutzneria	65	261.138
2035811|Pseudodesulfovibrio	65	288.877
178898|Carboxydocella	65	269.508
407217|Aquitalea	65	303.846
1849828|Paeniclostridium	65	244.708
1869285|Allofrancisella	65	274.923
168934|Thalassospira	65	283.615
1623278|Bronvirus	64	367.891
47670|Lautropia	64	306.031
34093|Simkania	64	238.859
1960084|Rodentibacter	64	258.031
112040|Zobellia	64	257.016
258255|Pseudovibrio	64	233.141
143222|Salegentibacter	64	263.672
187217|Tunavirus	64	367.531
1676651|Limnochorda	63	233.127
1193324|Alkalitalea	63	303.603
280472|Aquiflexum	63	243.619
175304|Lentibacillus	63	241.873
1160973|Auritidibacter	63	325.698
377315|Mariprofundus	63	262.476
2276|Pyrobaculum	63	251.778
88723|Natrinema	62	278.387
367771|Marinovum	62	290.565
114185|Candidatus Carsonella	62	257.387
48073|Microbulbifer	62	279.452
57739|Vogesella	62	283.516
2222|Methanothrix	62	333.952
230666|Chitinibacter	62	293.645
2038|Tropheryma	62	264.71
864|Pectinatus	61	231.754
191303|Turicibacter	61	297.049
527198|Mariniflexile	61	249.574
2335|Thermotoga	61	315.541
1541445|Candidatus Phaeomarinobacter	61	243.295
33001|Desulfurella	61	259.492
157920|Cellulosimicrobium	61	273.639
235572|Candidatus Portiera	61	287.918
869806|Marivirga	60	243.367
1274351|Kroppenstedtia	60	280.3
194195|Alysiella	60	299.167
2678343|Halalkaliarchaeum	60	325.317
76833|Actinobaculum	60	316.333
146918|Salinibacter	60	286
1594166|Oricola	59	247.949
43773|Syntrophus	59	232.814
947567|Litoreibacter	59	308.492
2420|Thermosipho	59	257.864
40222|Methylophaga	58	233.776
1906945|Parageobacillus	58	283.31
67572|Psychromonas	58	253.638
1649490|Rubinisphaera	58	161.586
1331051|Candidatus Saccharimonas	58	298.603
1897649|Pistricoccus	58	300.534
1654931|Crenobacter	57	263
2251|Haloferax	57	281.018
86331|Mogibacterium	57	334.281
116071|Micropruina	57	347.298
1720323|Lessievirus	57	379.456
392332|Geoalkalibacter	57	304.123
984996|Mobilicoccus	57	336.316
1778653|Sulfuriferula	57	285.491
231683|Saccharospirillum	56	235.357
1331737|Haloactinobacterium	56	299.446
2685905|Salicibibacter	56	306.179
1656823|Halanaeroarchaeum	56	249.964
203193|Halobiforma	56	289.036
41707|Lawsonia	56	214.143
648802|Rummeliibacillus	56	265.393
2039240|Anaerotignum	56	339.875
1295327|Croceicoccus	55	291.691
1163|Anabaena	55	313.582
869|Dichelobacter	55	262.764
1227|Nitrosococcus	55	340.527
1961799|Lacunisphaera	55	254.491
55968|Leucobacter	55	354.127
2422|Fervidobacterium	55	247.491
1433993|Chryseolinea	55	280.891
65047|Mitsuaria	55	309.655
543311|Parvimonas	55	193.473
393005|Tamlana	55	295.109
2608728|Acidisarcina	55	354.782
370735|Zhihengliuella	54	300.796
380738|Candidatus Kuenenia	54	301.093
127|Isosphaera	54	184.741
61434|Dehalococcoides	54	327.685
65496|Actinoalloteichus	54	289.296
347533|Zobellella	54	263.241
1918540|Muribaculum	54	284.315
573657|Candidatus Hodgkinia	53	270.057
2765402|Natrarchaeobaculum	53	277.113
881616|Herbiconiux	53	255.604
1511648|Defluviitoga	53	308.094
33877|Agromyces	53	291.792
939|Hydrogenobacter	53	288.264
246875|Algoriphagus	53	250.642
40751|Thioploca	52	268.212
2707020|Aerosticca	52	267.923
157591|Sterolibacterium	52	248.788
1443919|Tabrizicola	52	229.058
986106|Acidiferrobacter	51	188.608
160795|Ureibacillus	51	329.275
2680004|Protaetiibacter	51	318
191028|Leisingera	51	278.216
2060722|Labilibaculum	51	293.686
1125|Microcystis	51	254.863
1518149|Thalassotalea	51	274.275
745364|Luteipulveratus	51	332.118
254245|Aquicella	51	235.647
376488|Halotalea	51	298.137
843|Wolinella	50	290.18
54304|Planktothrix	50	316.12
360528|Pelagibaca	50	331.74
456492|Saccharibacillus	50	291.78
387342|Halopiger	50	259.8
46238|Entomoplasma	50	314.02
1004301|Flavihumibacter	50	368.18
1543705|Nitrospirillum	50	332.66
111500|Muricauda	50	343.5
1937972|Bernardetia	50	338.82
253238|Ethanoligenens	50	300.46
167639|Ilyobacter	50	292.1
158481|Hahella	50	269
204286|Cobetia	50	247.36
1484898|Methyloceanibacter	49	335.673
159191|Nodularia	49	276.878
233191|Caldilinea	49	328.612
1930845|Ndongobacter	49	328.633
1230698|Marisediminicola	49	301.469
2024975|Silvanigrella	49	205.531
99479|Tetrasphaera	49	304.286
1649|Kurthia	49	292.082
1882917|Pajaroellobacter	49	304.612
358023|Lutibacter	48	279.521
28196|Arcobacter	48	350.104
1902583|Candidatus Desulfofervidus	48	334.208
51366|Salinivibrio	48	335.229
744724|Halarchaeum	48	315.688
204619|Candidatus Nardonella	48	284.521
123|Pirellula	48	290.146
320496|Neoasaia	48	297.896
56106|Cylindrospermum	48	247.146
2126281|Mycolicibacillus	48	371
198251|Candidatus Pelagibacter	48	298.062
286104|Winogradskyella	48	236.083
2071|Saccharothrix	47	270.83
458032|Chloracidobacterium	47	316.298
241192|Thermodesulfatator	47	280.957
1843210|Anaerocolumna	47	413.766
265488|Rhodopirellula	47	171.021
1906660|Candidatus Mikella	47	249.66
232244|Belliella	47	240.234
2698688|Paraflavitalea	46	345.804
76632|Thermobacillus	46	341.196
57665|Sulfurospirillum	46	312.717
890|Desulfuromonas	46	352.413
644652|Gordonibacter	46	275.935
227873|Pannonibacter	46	302.174
119044|Filomicrobium	46	361.5
390846|Echinicola	46	272.152
2316020|Mediterraneibacter	46	296
1542963|Halapricum	46	299.109
2042066|Paraphotobacterium	46	331.978
33055|Candidatus Kinetoplastibacterium	46	299.435
455076|Rhodocytophaga	46	282.587
1433997|Diaminobutyricimonas	45	371.311
138|Borrelia	45	215.156
75687|Neptunomonas	45	326.244
57479|Microvirgula	45	318.689
1073531|Mycolicibacter	45	352.378
1779136|Bradymonas	45	304.333
2023|Thermoactinomyces	45	252.511
196082|Parascardovia	44	284.409
323413|Dokdonella	44	302.273
153135|Gammaretrovirus	44	324.295
745410|Gallaecimonas	44	262.818
556257|Pseudolabrys	44	357.023
568|Hafnia	43	262.744
96|Gallionella	43	230.372
1217416|Halioglobus	43	264.326
294702|Proteiniphilum	43	318.837
91914|Asaia	43	223.698
180541|Salinisphaera	43	294.442
1921784|Kiritimatiella	43	302.186
832|Fibrobacter	43	271.977
46239|Mesoplasma	42	326.048
82982|Obesumbacterium	42	321.595
2735|Verrucomicrobium	42	347.619
1677050|Novibacillus	42	336.929
1763521|Paludisphaera	42	318.69
1912215|Acidipropionibacterium	42	270.857
1849822|Paraclostridium	42	265.595
1193515|Snodgrassella	42	368.643
83551|Parachlamydia	42	323.048
2005380|Mariniblastus	42	212
261827|Algibacter	42	274.524
1069494|Trueperella	41	343.585
203133|Propionimicrobium	41	287.439
190323|Plantibacter	41	248.122
1099|Pelodictyon	41	318.049
741759|Tomitella	41	320.683
293088|Martelella	41	252.122
104264|Cellulophaga	41	282
2690160|Limihaloglobus	41	296.39
1653174|Actinotignum	41	323.976
2690159|Anaerohalosphaera	40	259.275
40272|Roseolovirus	40	330.025
39773|Methylomicrobium	40	261.975
1759331|Cnuibacter	40	271.725
375928|Natranaerobius	40	328.9
152161|Stappia	40	317.175
329857|Cohnella	40	282.15
2321111|Aliiarcobacter	39	265.846
76634|Mycetocola	39	339.641
428711|Jonquetella	39	305.795
417127|Zunongwangia	39	334.949
630749|Spongiibacter	39	350.462
1348508|Roseimicrobium	39	300.103
52959|Polaribacter	38	205.474
1078904|Candidatus Nitrosotalea	38	309.447
1827478|Youhaiella	38	365.132
1084558|Oceanicoccus	38	291.289
104267|Tenacibaculum	38	337.158
96492|Frigoribacterium	38	302.632
1740|Thermodesulfobacterium	38	275.658
1237|Piscirickettsia	38	331.553
2740557|Pauljensenia	37	367.27
2049301|Changchengzhania	37	307.622
162289|Peptoniphilus	37	266.946
1934947|Immundisolibacter	37	230
73778|Methylocaldum	37	260.216
289201|Pontibacillus	37	317.162
2078948|Epidermidibacterium	37	305.297
2697|Heliobacterium	37	316.838
1443590|Ferriphaselus	37	312.973
283735|Leeuwenhoekiella	36	257.528
1616789|Salinispira	36	368.611
34067|Cycloclasticus	36	344.667
743714|Orbus	36	332.028
354203|Yangia	36	369.361
673534|Plantactinospora	36	340.611
436357|Thalassococcus	36	320.333
105|Runella	36	321.056
1505664|Gottschalkia	35	292.143
162171|Magnetococcus	35	305.686
896|Desulfococcus	35	295.714
1920864|Rtpvirus	35	340.857
41201|Ewingella	35	299.086
278993|Thermincola	35	319.314
338321|Turneriella	35	340.571
316625|Saccharophagus	35	257.971
1156568|Methylovirgula	34	295.029
2239|Halobacterium	34	332.029
929509|Solitalea	34	321.353
1648508|Ciceribacter	34	264.853
153265|Aequorivita	34	357.5
76831|Myroides	33	311.848
1692042|Sulfurifustis	33	244.636
432330|Tumebacillus	33	216.364
1644057|Salinigranum	33	282.242
1190|Fischerella	33	283.545
51514|Dehalobacterium	33	337.939
82976|Buttiauxella	33	305.939
2676060|Allopseudarcicella	33	312.606
390805|Geosporobacter	33	286.818
323620|Shinella	33	363.909
33073|Zymobacter	32	341.594
79603|Denitrobacterium	32	299.094
153497|Kozakia	32	231.406
1505663|Erysipelatoclostridium	32	327.281
1434032|Pontimonas	32	217.969
2732587|Candidatus Vesicomyosocius	32	328.625
10358|Cytomegalovirus	32	339.25
267849|Nitrincola	32	343.094
2093783|Methylomusa	32	321.906
1521255|Candidatus Paracaedibacter	31	293
60136|Sulfitobacter	31	294.806
1524217|Labilithrix	31	313.774
244698|Gillisia	31	291.355
221065|Kordia	31	277.548
252306|Robiginitalea	31	293.323
2207|Methanosarcina	31	276.419
264688|Trichormus	31	362.548
1209327|Flavivirga	31	362.871
293431|Haloquadratum	31	330.065
57495|Dermacoccus	30	307.667
762296|Methylovulum	30	228.167
1970191|Salinivirga	30	278.933
33886|Rathayibacter	30	333.633
1221880|Psychrobacillus	30	289.967
134813|Natronorubrum	30	317.567
1915401|Roseitalea	30	321.4
1301080|Candidatus Nasuia	30	320
1073986|Halobellus	29	291.759
83681|Nonomuraea	29	318.103
1988031|Candidatus Promineofilum	29	312.862
1573534|Faecalitalea	29	353.138
58050|Moritella	29	324.379
365348|Pelosinus	28	253.5
1471399|Draconibacterium	28	331.643
447237|Frondihabitans	28	343.214
2160|Methanobacterium	28	298.893
2055880|Pseudescherichia	28	365.25
203804|Candidatus Blochmannia	28	316.821
2025617|Ketobacter	28	295.607
171163|Halosimplex	28	395
289244|Xylanimicrobium	27	294.185
1522431|Thermosulfurimonas	27	308.704
140458|Thermacetogenium	27	380.593
2115980|Candidatus Phycorickettsia	27	317.481
1804663|Haematospirillum	27	367.778
196081|Scardovia	27	254.37
50|Chondromyces	27	354.407
291183|Lacinutrix	27	289.037
89404|Glaciecola	26	310.462
1676125|Thermogutta	26	261.692
1287916|Euzebyella	26	294.038
1825023|Candidatus Nitrosotenuis	26	363.423
332951|Halovivax	26	353.154
1780190|Izhakiella	26	302.615
188143|Enterovibrio	26	353.192
59734|Empedobacter	26	384.154
44000|Caldicellulosiruptor	26	358.885
299261|Tateyamaria	25	324.24
1537406|Bacterioplanes	25	319.28
228398|Streptacidiphilus	25	366.6
2679910|Intestinibaculum	25	263.76
1433402|Glycocaulis	25	348.56
335927|Thalassobius	25	297.84
397864|Barnesiella	25	346.4
202746|Sulfurimonas	25	292.48
472568|Devriesea	25	330.32
292691|Gramella	24	236.333
74032|Antarctobacter	24	338.083
29526|Syntrophobacter	24	350.083
1755829|Ichthyobacterium	24	331.917
45667|Halobacillus	23	351.957
256319|Chlorobaculum	23	381.435
2077|Sporolactobacillus	23	367.261
63742|Natrialba	23	289.174
1652133|Halobacteriovorax	23	274.435
44|Melittangium	23	335.739
2078575|Psychromicrobium	23	334.217
265570|Sulfurovum	23	274.652
907364|Phytohabitans	23	301.217
171003|Caloranaerobacter	22	314.364
1980513|Candidatus Nitrosoglobus	22	312.773
292635|Laceyella	22	326.864
2029|Kibdelosporangium	22	213.727
2005386|Arabia	22	331.409
1209988|Halopenitus	22	338.864
1134403|Melioribacter	22	330.955
47251|Leptolyngbya	22	313.727
208215|Parvularcula	21	283.667
958|Bdellovibrio	21	340.667
1055688|Sandaracinus	21	313
2425|Teredinibacter	21	354.714
2256|Natronobacterium	21	321.857
28895|Thermoanaerobacterium	21	318.19
508459|Cloacibacillus	21	326.429
68288|Cyclobacterium	21	335.524
263377|Salipiger	21	349.905
2717|Cardiobacterium	21	273.619
83770|Succinivibrio	20	372.95
43356|Kutzneria	20	344.55
1744881|Sulfuricaulis	20	304.95
225842|Formosa	20	261.45
2058174|Antarcticibacterium	19	344.789
1784836|Fermentimonas	19	350.842
1742992|Paenarthrobacter	19	373.737
186831|Acetoanaerobium	19	269.316
53392|Thiodictyon	18	355.111
363408|Nonlabens	18	401.611
230494|Reinekea	18	351
33024|Phascolarctobacterium	18	323.222
2173039|Arcticibacterium	18	320.222
577309|Paraprevotella	18	377.444
1335631|Frischella	17	331.412
1408194|Endomicrobium	17	370.529
2529408|Schaalia	17	299.353
1129704|Kyrpidia	17	301.824
332102|Fluviicola	17	310.235
112987|Neochlamydia	16	329.5
36853|Desulfitobacterium	16	291.75
529881|Candidatus Aquiluna	16	359.25
336809|Candidatus Sulcia	16	228.062
346096|Paludibacter	16	351
46254|Oenococcus	15	296.933
1579315|Halocynthiibacter	15	348.667
1551504|Candidatus Babela	15	348.667
72173|Citromicrobium	15	358.667
109262|Halothiobacillus	14	277.5
518733|Microterricola	14	322.929
290174|Aquimarina	14	253.714
336276|Olleya	14	334.143
2304693|Pseudoclostridium	14	361.143
504090|Kushneria	14	306.571
44260|Moorella	13	275.615
39948|Dialister	13	301.923
2282740|Desulfallas	13	330.846
59735|Bergeyella	12	351.583
235888|Salinibacterium	11	324.182
1649454|Glaciihabitans	10	337.3
398041|Flavisolibacter	10	317.8
1964366|Nissabacter	10	316.3
538|Eikenella	10	284.3
252356|Maribacter	10	342
574697|Butyricimonas	10	380.4
1649480|Planctopirus	10	253.9
1434010|Jatrophihabitans	10	395.7

## Sheet: bowtie2
feature	count	importance-rank
2732977|Citexvirus	100	5.15
1849|Actinopolyspora	100	36.79
687331|Alphatorquevirus	100	52.13
34102|Sphaerotilus	100	59.84
875170|Celeribacter	100	160.55
529883|Rhodoluna	100	75.87
2676060|Allopseudarcicella	100	121.57
2571159|Mycetohabitans	100	54.79
54066|Xylophilus	100	71.24
1941236|Gemykibivirus	100	11.58
157920|Cellulosimicrobium	100	129.08
327159|Candidatus Accumulibacter	100	150.66
1301080|Candidatus Nasuia	100	62.05
651660|Paenisporosarcina	100	40.07
1295327|Croceicoccus	100	91.71
1231242|Ferrovibrio	100	41.36
59282|Blastochloris	100	18.68
318147|Paucibacter	100	110.34
10405|Orthohepadnavirus	100	6.52
1632780|Phreatobacter	100	6.36
234|Brucella	100	106.3
28209|Chelatococcus	99	88.3333
125287|Ornithinimicrobium	99	108.232
1331737|Haloactinobacterium	99	167.879
596707|Sinomonas	99	186.586
1184606|Austwickia	99	121.626
256319|Chlorobaculum	99	151.596
11646|Lentivirus	99	133.374
745364|Luteipulveratus	99	138.273
106146|Pelistega	99	99.8788
72763|Tessaracoccus	99	43.1414
65047|Mitsuaria	99	145.707
32014|Iodobacter	99	120.061
986106|Acidiferrobacter	99	152.061
1097466|Defluviimonas	99	157.192
334107|Conchiformibius	99	143.929
1847725|Lawsonella	99	36.1717
2005386|Arabia	99	222.707
2316020|Mediterraneibacter	98	117.724
292486|Avibacterium	98	199.439
86795|Marmoricola	98	210
1484898|Methyloceanibacter	98	59.7449
665568|Paraoerskovia	98	161.367
1602345|Parasaccharibacter	98	171.071
71|Simonsiella	98	117.816
1623278|Bronvirus	98	104.765
187|Aquaspirillum	98	123.776
455076|Rhodocytophaga	98	232.122
1521255|Candidatus Paracaedibacter	98	134.429
28196|Arcobacter	98	63.9184
1649463|Lentilitoribacter	98	195.051
543311|Parvimonas	98	158.347
140458|Thermacetogenium	97	212
2678343|Halalkaliarchaeum	97	213.186
140052|Betaretrovirus	97	122.402
44258|Caloramator	97	104.062
238749|Diaphorobacter	97	71.0515
59739|Flammeovirga	97	212.948
1443590|Ferriphaselus	97	115.732
2078575|Psychromicrobium	97	193.897
1906660|Candidatus Mikella	97	159.433
1763521|Paludisphaera	96	233.552
292691|Gramella	96	110.094
461|Fluoribacter	96	116.865
1804663|Haematospirillum	96	139.281
119044|Filomicrobium	96	205.333
2717089|Massilistercora	96	141.844
171003|Caloranaerobacter	95	241.989
465|Tatlockia	95	152.389
466152|Singulisphaera	95	111.768
191769|Marinilactibacillus	95	177.737
40222|Methylophaga	95	182.4
1569|Sporosarcina	95	165.442
2256|Natronobacterium	95	190.895
106591|Ensifer	95	222.863
599651|Bermanella	95	225.632
241192|Thermodesulfatator	95	249.126
2211641|Yoonia	95	100.526
556257|Pseudolabrys	95	126.989
74385|Gracilibacillus	95	182.221
1518149|Thalassotalea	94	133.511
630749|Spongiibacter	94	242.84
167639|Ilyobacter	94	273.319
152161|Stappia	94	126.67
152267|Pigmentiphaga	94	168.851
154116|Georgenia	94	199.426
162491|Oerskovia	94	231.734
109262|Halothiobacillus	93	214.075
69474|Orientia	93	161.935
47|Archangium	93	194.022
332951|Halovivax	93	205.774
1826864|Candidatus Nitrosocosmicus	93	162.538
1649510|Variibacter	93	180.892
388463|Edaphobacter	93	303
1769729|Hathewaya	93	203.538
459532|Terribacillus	93	220.204
2024975|Silvanigrella	93	170.28
194195|Alysiella	93	207.968
1594166|Oricola	92	271.913
219181|Ottowia	92	210.13
39773|Methylomicrobium	92	187.217
232523|Hylemonella	92	208.141
1302410|Candidatus Annandia	92	217.348
1616789|Salinispira	92	250.054
34008|Rhodovulum	91	205.407
2304693|Pseudoclostridium	91	195.879
191303|Turicibacter	91	180.11
644355|Inhella	91	134.319
1091|Chlorobium	91	294.659
1714270|Gammasphaerolipovirus	91	269.582
353799|Halostagnicola	91	239.802
984996|Mobilicoccus	90	210.489
236752|Fastidiosipila	90	247.544
2115980|Candidatus Phycorickettsia	90	228.733
336809|Candidatus Sulcia	90	236.1
1676651|Limnochorda	90	173.889
346096|Paludibacter	90	119.6
40544|Sutterella	90	196.056
1654741|Bombella	90	192.478
34019|Liberibacter	90	256.067
939|Hydrogenobacter	90	280.222
2282523|Methylorubrum	90	156.022
29393|Dolosigranulum	90	117.411
240411|Chitinimonas	89	160.494
33886|Rathayibacter	89	297.955
1158|Oscillatoria	89	240.742
245876|Nitratireductor	89	217.843
896|Desulfococcus	89	147.955
1649468|Melaminivora	89	109.697
290174|Aquimarina	89	267.517
1193515|Snodgrassella	89	146.416
169055|Nordella	89	300.472
29526|Syntrophobacter	89	216.674
40272|Roseolovirus	89	323.798
1073986|Halobellus	88	276.114
1988031|Candidatus Promineofilum	88	210.136
79603|Denitrobacterium	88	266.955
1069494|Trueperella	88	157.432
162171|Magnetococcus	88	222.364
1869285|Allofrancisella	88	237.909
246875|Algoriphagus	88	242.739
146784|Bacteriovorax	88	217.159
261963|Kangiella	88	189.773
40751|Thioploca	87	264.552
91914|Asaia	87	209.092
2321111|Aliiarcobacter	87	164.943
1934947|Immundisolibacter	87	217.414
1905344|Ruthenibacterium	87	305.379
542837|Zindervirus	87	228.448
225143|Oceanisphaera	87	181.621
1055323|Aeribacillus	87	179.563
90243|Oligella	87	151.954
153497|Kozakia	87	185.563
75905|Thermocrinis	87	277.437
1911549|Raineyella	87	323.057
2035811|Pseudodesulfovibrio	87	207.655
752201|Sphaerospermopsis	87	336.782
104204|Streptomonospora	86	251.023
171|Leptospira	86	244.802
1608298|Thiolapillus	86	254.547
1186|Calothrix	86	306.035
1706036|Gemmatirosa	86	236.023
142577|Prauserella	86	198.547
1960084|Rodentibacter	86	197.384
1395974|Tardiphaga	86	259.14
469322|Steroidobacter	86	203.779
655352|Cohaesibacter	86	260.058
175304|Lentibacillus	86	232.326
34093|Simkania	86	199.884
1649279|Epibacterium	85	177.459
200903|Paraliobacillus	85	279.024
1849828|Paeniclostridium	85	206.859
143222|Salegentibacter	85	204.824
65496|Actinoalloteichus	85	231.329
511434|Candidatus Azobacteroides	85	243.671
233191|Caldilinea	85	306.576
1209988|Halopenitus	84	256.476
754249|Luteimicrobium	84	305.976
258255|Pseudovibrio	84	174.917
299566|Adhaeribacter	84	227.512
11019|Alphavirus	84	212.179
28050|Lachnospira	84	300
48073|Microbulbifer	84	232.321
33001|Desulfurella	84	235.06
413435|Solimonas	84	230.262
1611681|Mucinivorans	84	345.56
2276|Pyrobaculum	84	311.488
1649486|Rhizorhabdus	84	164.012
1470540|Jeotgalibaca	84	214.643
2675230|Cytobacillus	83	154.819
644652|Gordonibacter	83	231.193
228398|Streptacidiphilus	83	246.422
57479|Microvirgula	83	229.108
84406|Virgibacillus	83	252.855
55968|Leucobacter	83	286.506
2035712|Guyparkeria	83	357.566
332246|Halalkalicoccus	83	178.301
370735|Zhihengliuella	83	160.783
45669|Salinicoccus	83	187.012
626119|Ruania	82	247.915
2765402|Natrarchaeobaculum	82	138.756
416|Methylomonas	82	277.646
231454|Dyella	82	295.439
1205|Trichodesmium	82	328.366
1125|Microcystis	82	232.768
497726|Nitrososphaera	82	302.354
1085622|Propioniciclava	82	321.22
376170|Haloplanus	82	265.707
573657|Candidatus Hodgkinia	82	299.951
2335|Thermotoga	82	297.122
1511648|Defluviitoga	82	311.573
869|Dichelobacter	82	173.793
34067|Cycloclasticus	82	150.415
359336|Castellaniella	82	291.537
249529|Caldanaerobacter	82	236.768
1915401|Roseitalea	81	319.111
1759331|Cnuibacter	81	223.222
1471399|Draconibacterium	81	281.519
1129704|Kyrpidia	81	317.012
203133|Propionimicrobium	81	342.247
257820|Kerstersia	81	168.778
332102|Fluviicola	80	243.8
1906657|Candidatus Doolittlea	80	312.288
2172|Methanobrevibacter	80	232
267849|Nitrincola	80	204.738
171163|Halosimplex	80	324.962
1897649|Pistricoccus	80	232.025
86331|Mogibacterium	80	173.713
648802|Rummeliibacillus	79	235.81
57665|Sulfurospirillum	79	261.114
843|Wolinella	79	301.532
1754|Thermoanaerobacter	79	295.253
178469|Arenibacter	79	281.975
1911573|Haloprofundus	79	357.759
428711|Jonquetella	79	284.278
76831|Myroides	78	212.449
1988|Actinomadura	78	202.308
262|Francisella	78	268.577
1802983|Candidatus Fokinia	78	306.641
323413|Dokdonella	78	242.923
1649480|Planctopirus	78	225.205
156973|Dysgonomonas	78	226.103
1075397|Halolamina	78	226.218
1565532|Rouxiella	78	215.679
367298|Phycicoccus	78	286.449
1751872|Lacimicrobium	78	292.744
1172191|Catenovulum	78	242.5
1676142|Wenzhouxiangella	78	279.564
1237|Piscirickettsia	78	191.718
436357|Thalassococcus	78	191.859
444051|Mesoflavibacter	78	307.115
1980514|Halodesulfurarchaeum	77	351.558
320496|Neoasaia	77	273.792
1335631|Frischella	77	242.442
2675231|Mesobacillus	77	296.922
288793|Salinimonas	77	291.065
45989|Methanoculleus	77	365.727
2147|Acholeplasma	77	207.299
990721|Christensenella	77	219.026
10509|Mastadenovirus	77	362.039
1579506|Roseimaritima	76	253.868
196081|Scardovia	76	292.25
59735|Bergeyella	76	250.829
401618|Candidatus Riesia	76	219.053
447467|Simiduia	76	314.961
64159|Desulfurobacterium	76	304.553
48075|Marinobacterium	76	280.75
33055|Candidatus Kinetoplastibacterium	76	292.105
141948|Thermomonas	76	281.197
293088|Martelella	76	187.013
285107|Thioclava	76	260.803
1861863|Sinimarinibacterium	76	349.368
1862|Dermatophilus	76	242.329
1729679|Faecalibaculum	76	244.671
64895|Borreliella	75	317.84
1331730|Chryseoglobus	75	253.573
1221880|Psychrobacillus	75	267.373
1970191|Salinivirga	75	249.92
1744881|Sulfuricaulis	75	249.973
1511635|Aquisphaera	75	320.36
1522431|Thermosulfurimonas	75	316.227
1542963|Halapricum	75	327.347
281472|Jiangella	75	286.6
168934|Thalassospira	75	171.827
2732587|Candidatus Vesicomyosocius	74	313.459
432330|Tumebacillus	74	149.419
316625|Saccharophagus	74	342.946
2173039|Arcticibacterium	74	299.689
1921582|Orrella	74	240.135
335927|Thalassobius	74	200.324
1217416|Halioglobus	74	286.27
908623|Euzebya	74	377.473
52959|Polaribacter	74	273.446
83614|Luteimonas	74	306.351
114185|Candidatus Carsonella	73	282.288
2237|Haloarcula	73	350.178
204619|Candidatus Nardonella	73	196.959
400947|Deefgea	73	269.822
518733|Microterricola	73	260.233
2304692|Hungateiclostridium	73	232.233
46239|Mesoplasma	73	279.137
1738655|Woeseia	73	286.137
1742992|Paenarthrobacter	73	300.671
311181|Denitratisoma	73	288.301
375928|Natranaerobius	73	262.055
2420|Thermosipho	73	322.027
34098|Blattabacterium	73	290.479
1562|Desulfotomaculum	73	302.904
762296|Methylovulum	73	244.452
2058174|Antarcticibacterium	73	339.658
2735|Verrucomicrobium	73	203.027
55079|Aneurinibacillus	72	209.819
1902583|Candidatus Desulfofervidus	72	291.958
116071|Micropruina	72	272.806
1649|Kurthia	72	225.292
1981050|Phoenicibacter	72	290.333
1331051|Candidatus Saccharimonas	72	222.375
398041|Flavisolibacter	72	219.389
1485594|Methyloligella	72	206.194
1882917|Pajaroellobacter	72	242.25
1621534|Paraglaciecola	72	310.681
43356|Kutzneria	72	287.944
472825|Candidatus Purcelliella	71	306.437
71666|Waddlia	71	292.873
295595|Candidatus Hepatoplasma	71	270.803
39948|Dialister	71	246.408
390805|Geosporobacter	71	284.62
63742|Natrialba	71	256.972
56358|Sandaracinobacter	71	355.366
204456|Gemmobacter	71	278.972
1755829|Ichthyobacterium	71	238.352
1855416|Qipengyuania	71	308.465
153265|Aequorivita	71	238.732
682522|Ilumatobacter	70	274.214
189384|Candidatus Tremblaya	70	271.457
2675233|Metabacillus	70	257.471
76634|Mycetocola	70	294.957
2038|Tropheryma	70	259.186
1649474|Nibribacter	70	283.257
1911577|Oryzomicrobium	70	237.857
36739|Dermabacter	70	237.614
334202|Mupapillomavirus	70	361.414
1551504|Candidatus Babela	70	214.457
2039240|Anaerotignum	70	348.314
2005380|Mariniblastus	69	200.913
1705353|Aurantimicrobium	69	305.551
1648508|Ciceribacter	69	256.87
946234|Flavonifractor	69	286.29
407217|Aquitalea	69	263.261
2060722|Labilibaculum	69	280.768
568|Hafnia	68	277.735
929509|Solitalea	68	357.426
490567|Arenimonas	68	213.926
527198|Mariniflexile	68	307.926
336276|Olleya	68	295.618
953|Wolbachia	68	282.162
10375|Lymphocryptovirus	68	152.25
1004301|Flavihumibacter	67	184.134
1623298|Phietavirus	67	298.493
2051044|Tuwongella	67	325.761
82980|Leminorella	67	282.567
76632|Thermobacillus	67	326.657
93682|Roseivivax	67	224.672
1055692|Chitinolyticbacter	67	275.597
83551|Parachlamydia	67	261.612
347533|Zobellella	67	256.493
29287|Natronococcus	67	204.896
376488|Halotalea	67	287.672
1827478|Youhaiella	67	313.149
196082|Parascardovia	67	396.687
458032|Chloracidobacterium	66	307.773
1348508|Roseimicrobium	66	383.606
456492|Saccharibacillus	66	303.106
1434050|Zhongshania	66	255.621
123|Pirellula	66	270.136
1663717|Herbinix	66	247.348
893|Desulfobulbus	66	241.273
265488|Rhodopirellula	66	290.076
472568|Devriesea	66	226.909
157226|Jeotgalibacillus	66	214.742
2690159|Anaerohalosphaera	66	287.636
1101|Prosthecochloris	66	272.076
1644057|Salinigranum	66	346.909
18|Pelobacter	65	233.615
1434018|Lysinimonas	65	263.662
1160973|Auritidibacter	65	302.877
744724|Halarchaeum	65	328.523
46238|Entomoplasma	65	318.031
169133|Citricoccus	65	271.754
1073987|Halorientalis	65	319.677
529881|Candidatus Aquiluna	65	314.723
1656823|Halanaeroarchaeum	65	384.738
504090|Kushneria	65	249.369
49277|Psychroserpens	65	237.646
227873|Pannonibacter	65	258.031
159345|Roseibacterium	65	297.092
323620|Shinella	65	296.569
1623304|Moineauvirus	64	396.344
1543704|Niveispirillum	64	214.844
158876|Yokenella	64	336.016
1652133|Halobacteriovorax	64	216.609
1780190|Izhakiella	64	336.047
2603324|Acidibrevibacterium	64	211.75
1682492|Candidatus Tachikawaea	64	303.641
351195|Salimicrobium	64	257.844
246861|Grimontia	64	320.312
2737|Vagococcus	64	163.891
360528|Pelagibaca	64	200.812
2005363|Auricoccus	64	188.984
392332|Geoalkalibacter	64	272.578
773|Bartonella	64	264.906
1287916|Euzebyella	64	329.141
2132|Spiroplasma	64	303.344
1195526|Gryllotalpicola	64	303.984
425|Methylosinus	64	310.812
180541|Salinisphaera	63	293.556
2207|Methanosarcina	63	370.222
1653174|Actinotignum	63	272.794
458839|Actinotalea	63	217.937
2019482|Brevefilum	63	273.984
577309|Paraprevotella	63	318.556
104264|Cellulophaga	63	263
278993|Thermincola	63	383.254
235572|Candidatus Portiera	63	275.651
60846|Halogeometricum	63	377.841
898|Desulfomicrobium	63	239.46
56106|Cylindrospermum	62	348.016
44260|Moorella	62	201.21
1843210|Anaerocolumna	62	346.274
745410|Gallaecimonas	62	310.21
2370|Xylella	62	262.274
499228|Tepidanaerobacter	62	362.694
1649454|Glaciihabitans	62	241.516
112040|Zobellia	62	270.419
204286|Cobetia	61	357.393
673534|Plantactinospora	61	312.738
111500|Muricauda	61	303.525
1163|Anabaena	61	378.131
2233801|Ahniella	61	306.623
1980513|Candidatus Nitrosoglobus	61	316.443
31988|Aminobacter	61	282.098
231683|Saccharospirillum	61	292.213
127|Isosphaera	61	207.148
40136|Oligotropha	61	277.705
397864|Barnesiella	61	384.279
1649470|Minicystis	60	278.35
83681|Nonomuraea	60	225.667
1156568|Methylovirgula	60	365.717
365348|Pelosinus	60	287.55
508459|Cloacibacillus	60	400.65
158481|Hahella	60	312.817
1283313|Alloprevotella	60	271.5
204447|Skermanella	60	149.933
810|Chlamydia	60	218.467
2077|Sporolactobacillus	60	322.75
238783|Pseudorhodobacter	60	273.183
2422|Fervidobacterium	60	253.317
1084558|Oceanicoccus	59	264.068
46352|Agrococcus	59	263.661
191028|Leisingera	59	360.186
1935188|Libanicoccus	59	332.695
1433993|Chryseolinea	59	269.525
79328|Chitinophaga	59	269.458
2690160|Limihaloglobus	59	298.102
447020|Adlercreutzia	59	378.627
1274351|Kroppenstedtia	59	326.051
10358|Cytomegalovirus	59	276.339
29407|Rhodoplanes	59	229.305
890|Desulfuromonas	58	257.31
44000|Caldicellulosiruptor	58	342.293
178898|Carboxydocella	58	291.707
830|Butyrivibrio	58	265.517
655184|Candidatus Thioglobus	58	331.19
1607807|Candidatus Methanoplasma	58	379.293
2045213|Candidatus Fonsibacter	58	301.224
2679910|Intestinibaculum	58	327.397
1543705|Nitrospirillum	57	373.719
2222|Methanothrix	57	337.14
117156|Actinopolymorpha	57	246.035
1755825|Egicoccus	57	354.316
1433402|Glycocaulis	57	300.14
1912215|Acidipropionibacterium	57	334.526
2202|Methanospirillum	57	331.719
651456|Kosmotoga	57	353.86
2251|Haloferax	56	384.732
119541|Rhodobaca	56	307.357
832|Fibrobacter	56	295.411
53392|Thiodictyon	56	237
869806|Marivirga	56	291.714
393005|Tamlana	55	334.782
1434046|Sphingorhabdus	55	320.945
41273|Tissierella	55	354.545
70774|Hydrogenophilus	55	316.073
2717|Cardiobacterium	55	321.527
2689587|Suicoccus	55	317.836
47251|Leptolyngbya	55	246.291
82982|Obesumbacterium	55	309.618
1203|Scytonema	55	265.309
286104|Winogradskyella	55	290.545
1078904|Candidatus Nitrosotalea	54	387.556
2028344|Ereboglobus	54	332.574
28236|Petrotoga	54	367.852
187217|Tunavirus	54	327.5
41707|Lawsonia	54	311.852
434|Acetobacter	54	256.574
68288|Cyclobacterium	54	207.944
263377|Salipiger	54	333.667
230666|Chitinibacter	54	332.259
1936111|Fuerstia	54	282.148
88723|Natrinema	53	185.509
50|Chondromyces	53	221.698
33951|Acetobacterium	53	311.283
53945|Octadecabacter	53	310.151
47670|Lautropia	53	248.981
203193|Halobiforma	53	233.528
1107|Chloroflexus	53	374.774
2220|Methanolobus	53	368.755
1137960|Allokutzneria	53	245.868
1344552|Noviherbaspirillum	53	280.717
1926259|Pseudactinotalea	53	269.887
697025|Hoyosella	53	345.604
29574|Taylorella	53	252.868
28250|Ornithobacterium	53	307.396
2698688|Paraflavitalea	53	265.528
67575|Rheinheimera	53	279.057
743714|Orbus	52	149.654
1408194|Endomicrobium	52	302.558
157591|Sterolibacterium	52	288.827
45667|Halobacillus	52	286.115
1209327|Flavivirga	52	331
112987|Neochlamydia	52	275.558
1572860|Hartmannibacter	52	325.808
283735|Leeuwenhoekiella	52	348.212
380738|Candidatus Kuenenia	52	351.558
649461|Lacibacter	52	346.712
242605|Luteibacter	52	331.75
28228|Colwellia	52	250.135
1849822|Paraclostridium	52	254.231
104267|Tenacibaculum	52	306.577
252356|Maribacter	52	285.404
33877|Agromyces	52	328.865
74032|Antarctobacter	52	289.423
72173|Citromicrobium	52	346.673
43773|Syntrophus	51	215.078
379068|Galbibacter	51	309.588
1204360|Siansivirga	51	360.902
186831|Acetoanaerobium	51	295.451
202746|Sulfurimonas	51	355
51514|Dehalobacterium	51	343.588
1509243|Candidatus Nucleicultrix	50	245.7
1218|Prochlorococcus	50	343.64
1930845|Ndongobacter	50	360.6
2600304|Baekduia	50	381.12
1734920|Pseudorhodoplanes	50	259.82
289201|Pontibacillus	50	357.78
160795|Ureibacillus	49	244.796
1193324|Alkalitalea	49	190.571
41201|Ewingella	49	291.184
121871|Haloterrigena	49	139.102
293431|Haloquadratum	49	329.306
2126281|Mycolicibacillus	49	292.673
2608728|Acidisarcina	49	259.571
335405|Sphingosinicella	49	277.714
1825023|Candidatus Nitrosotenuis	49	247.837
69578|Cryobacterium	49	306.143
358023|Lutibacter	49	296.347
1518147|Wenyingzhuangia	49	316.286
190323|Plantibacter	49	282.531
2700084|Urechidicola	48	315.312
359407|Methylotenera	48	301.812
1649478|Pelolinea	48	379.792
2094023|Glaesserella	48	271.938
76833|Actinobaculum	48	282.708
768|Anaplasma	48	317.188
79206|Desulfosporosinus	48	187.396
51366|Salinivibrio	48	302.583
155977|Acaryochloris	47	369.383
2697|Heliobacterium	47	371.723
307628|Petrimonas	47	267.106
93|Stella	47	294.149
366614|Haematobacter	47	208.064
1541445|Candidatus Phaeomarinobacter	47	297.723
1920864|Rtpvirus	47	318.979
28884|Hydrogenovibrio	46	325.957
1654931|Crenobacter	46	319.804
1505663|Erysipelatoclostridium	46	286.543
1508657|Ruminiclostridium	46	340.391
2129|Ureaplasma	46	337.435
204476|Labrys	46	347.761
273135|Candidatus Cardinium	46	368.348
305899|Endozoicomonas	46	283.826
2078948|Epidermidibacterium	45	350.644
1573534|Faecalitalea	45	393.867
670486|Dehalogenimonas	45	313.2
1937972|Bernardetia	45	399.333
2055880|Pseudescherichia	45	278.844
1778653|Sulfuriferula	45	301.889
1099|Pelodictyon	45	288.667
2025617|Ketobacter	44	280.068
2049301|Changchengzhania	44	383.432
146918|Salinibacter	44	416.386
2321113|Pseudoarcobacter	44	342.432
96|Gallionella	43	274.488
1692042|Sulfurifustis	43	317.86
227388|Thermodesulfobium	43	327.116
135575|Idiomarina	43	318.837
1273155|Thiohalobacter	43	301.349
1623297|Stanholtvirus	43	111.651
2093|Mycoplasma	43	296.721
1778601|Apibacter	43	315.605
907364|Phytohabitans	42	404.857
363408|Nonlabens	42	344.524
1291539|Candidatus Methanomethylophilus	42	345.476
291183|Lacinutrix	42	322.238
36853|Desulfitobacterium	42	302.405
208215|Parvularcula	42	290.214
82976|Buttiauxella	42	335.452
1161127|Murdochiella	42	263.548
1769012|Arachidicoccus	42	271.119
61434|Dehalococcoides	42	183.857
417127|Zunongwangia	42	337.286
264688|Trichormus	42	350.667
230494|Reinekea	42	235.929
776|Coxiella	41	342.244
377315|Mariprofundus	41	291.195
46205|Pseudobutyrivibrio	41	353.756
1230698|Marisediminicola	41	344.171
2160|Methanobacterium	41	286.122
1649459|Hungatella	41	280.78
153135|Gammaretrovirus	41	236.22
2036021|Agarilytica	40	330.475
2707020|Aerosticca	40	281.125
54304|Planktothrix	40	262.175
89966|Hymenobacter	40	319.625
2425|Teredinibacter	40	296.35
1433997|Diaminobutyricimonas	40	298.65
60136|Sulfitobacter	40	275.525
427753|Humibacter	40	374.7
947567|Litoreibacter	40	269.225
188143|Enterovibrio	40	301.725
1582879|Ezakiella	39	280.436
1434010|Jatrophihabitans	39	318.256
933|Thiomicrospira	39	229.949
282132|Candidatus Protochlamydia	39	275.231
1649490|Rubinisphaera	39	306.282
1100891|Paenalcaligenes	39	282.205
1676125|Thermogutta	39	281.821
444459|Flagellimonas	38	345.526
29331|Amphibacillus	38	285.947
2029|Kibdelosporangium	38	360.921
2740557|Pauljensenia	38	262.395
289244|Xylanimicrobium	38	348.158
68|Lysobacter	38	349.132
1921784|Kiritimatiella	38	253.316
2675229|Peribacillus	38	227.105
225842|Formosa	37	294.486
267408|Arsenicicoccus	37	274.027
349742|Sedimenticola	37	330.784
649460|Filimonas	37	286.541
58050|Moritella	36	345.222
235888|Salinibacterium	36	218.417
187492|Thalassolituus	36	292.583
261827|Algibacter	36	315.111
2023|Thermoactinomyces	36	286.167
1134403|Melioribacter	36	350.333
748770|Dolichospermum	35	332.029
623276|Maritalea	35	307.371
44474|Pleurocapsa	35	400.514
1227|Nitrosococcus	35	263.943
33024|Phascolarctobacterium	35	299.629
326319|Dokdonia	35	348.886
2478349|Indioceanicola	35	395.343
2042066|Paraphotobacterium	34	265.794
329857|Cohnella	34	320.647
12141|Tombusvirus	34	248.853
1392389|Intestinimonas	34	336.706
1906945|Parageobacillus	34	299.706
379070|Gilvibacter	34	367.029
354203|Yangia	34	291
1505664|Gottschalkia	34	332.529
1784836|Fermentimonas	34	299.559
1940138|Candidatus Walczuchella	34	313.706
881616|Herbiconiux	34	212.647
96492|Frigoribacterium	34	339.882
1073531|Mycolicibacter	34	234.059
46254|Oenococcus	34	334
1779136|Bradymonas	34	278.059
1740|Thermodesulfobacterium	33	388.879
574697|Butyricimonas	33	350.212
1335745|Spiribacter	33	307.97
390846|Echinicola	33	340.333
44471|Microcoleus	33	282.909
99479|Tetrasphaera	33	320.939
159191|Nodularia	32	308.375
141450|Oleiphilus	32	336.938
1443919|Tabrizicola	32	328.875
387095|Maribius	32	233.5
57739|Vogesella	32	315.656
538|Eikenella	32	289.438
2483368|Sedimentisphaera	32	308.781
233189|Anaerolinea	31	369.129
1720323|Lessievirus	31	364.968
146|Spirochaeta	31	350.161
518753|Luteolibacter	30	363.167
1579315|Halocynthiibacter	30	309.167
221065|Kordia	30	307.6
265570|Sulfurovum	30	330.133
1524217|Labilithrix	30	273.933
2239|Halobacterium	30	252.767
414371|Aureimonas	30	345.033
958|Bdellovibrio	30	225.133
198251|Candidatus Pelagibacter	29	278.138
252306|Robiginitalea	29	342.448
885864|Jeongeupia	29	371.345
1299429|Yuavirus	29	388.862
253238|Ethanoligenens	29	303.69
1918540|Muribaculum	29	310.793
254245|Aquicella	28	210.607
75309|Rhodanobacter	28	324.179
114627|Alkaliphilus	28	367.107
1961799|Lacunisphaera	28	320.571
203804|Candidatus Blochmannia	28	346.75
947525|Miniimonas	27	364.185
134813|Natronorubrum	27	148.111
864|Pectinatus	27	385.407
83612|Psychroflexus	27	334.63
75687|Neptunomonas	27	340.222
447237|Frondihabitans	27	294.259
261825|Agarivorans	27	371.444
85076|Marichromatium	26	319.308
1190|Fischerella	26	334.115
2321115|Halarcobacter	26	321.077
1647|Erysipelothrix	26	368.769
2071|Saccharothrix	25	327.32
168808|Sneathia	25	363.04
1677050|Novibacillus	25	337.6
89404|Glaciecola	25	385.64
294702|Proteiniphilum	24	333.042
2680004|Protaetiibacter	24	235.417
2375|Sporomusa	24	223.083
367771|Marinovum	24	363.25
1184396|Mesotoga	24	385.458
1649453|Gimesia	24	347.875
1434032|Pontimonas	23	298.304
1525371|Neorhizobium	23	315.13
453161|Candidatus Nitrotoga	23	285.522
1912217|Pseudopropionibacterium	23	243.174
1007|Saprospira	22	339.636
687333|Gammatorquevirus	22	180.682
105|Runella	22	349.182
2330|Halanaerobium	22	394.318
244698|Gillisia	22	322.545
1051|Ectothiorhodospira	21	262.619
1537406|Bacterioplanes	21	281.762
2661818|Saliniradius	21	349.857
379899|Niabella	21	369.143
1055688|Sandaracinus	20	328.8
2733115|Naesvirus	20	358
292635|Laceyella	20	275.45
338321|Turneriella	20	408.4
67572|Psychromonas	20	344.4
2282740|Desulfallas	20	447.3
2529408|Schaalia	19	338.263
138|Borrelia	19	311.316
73778|Methylocaldum	19	379.316
83770|Succinivibrio	19	415.526
1524214|Vulgatibacter	19	382.579
1964366|Nissabacter	19	359.368
1434019|Mameliella	19	294.632
2093783|Methylomusa	19	259.421
1077265|Chthonomonas	18	387.5
299261|Tateyamaria	18	394.611
33073|Zymobacter	18	329.944
162289|Peptoniphilus	18	274.944
232244|Belliella	18	377.444
286130|Sulfuricurvum	17	355.118
2685905|Salicibibacter	17	316.941
2489367|Candidatus Cyclonatronum	16	206.562
280472|Aquiflexum	15	279.733
387342|Halopiger	15	245.067
741759|Tomitella	14	458.786
57495|Dermacoccus	14	241.929
28895|Thermoanaerobacterium	13	233.615
44|Melittangium	11	403
687332|Betatorquevirus	11	437.545
59734|Empedobacter	10	385.5
99|Ancylobacter	10	206.1
